# Supplementary material for: Divergent synthesis of nitrocyclopropanes and isoxazoline N-oxides from nitro compounds and vinyl sulfonium salts
Source: Royal Society of Chemistry journal article supplement (doi:10.1039/d3qo01664a), 2023-11-22

**Divergent synthesis of nitrocyclopropanes and isoxazoline *N*-oxides from nitro compounds  
and vinyl sulfonium salts**

Ushakov P. Yu., Golovanov I. S., Ioffe S. L., Tabolin A. A.

## Table of contents

|                                                                                 |     |
|---------------------------------------------------------------------------------|-----|
| 1. General information                                                          | 3   |
| 2. Synthesis of nitro compounds 3                                               | 4   |
| 3. Synthesis of sulfonium salts 4                                               | 6   |
| 4. Optimization study                                                           | 9   |
| 5. Synthesis of nitro cyclopropanes 1                                           | 12  |
| 6. Synthesis of isoxazoline <i>N</i> -oxides 2                                  | 22  |
| 7. Post transformations of nitro cyclopropanes and isoxazoline <i>N</i> -oxides | 29  |
| 8. DFT calculations                                                             | 32  |
| 9. References                                                                   | 133 |
| 10. Spectra copies                                                              | 135 |

## 1. General information

All reactions were carried out in oven-dried (150°C) glassware.

NMR spectra were recorded at 298K with residual solvents peaks as an internal standard. Multiplicities are indicated by s (singlet), d (doublet), t (triplet), q (quartet), p (pentet), m (multiplet), br (broad). Assignment of  $^1\text{H}$  and  $^{13}\text{C}$  NMR spectra is based on 2D NMR ( $^1\text{H}$ - $^1\text{H}$  COSY,  $^1\text{H}$ - $^{13}\text{C}$  HSQC,  $^1\text{H}$ - $^{13}\text{C}$  HMBC,  $^1\text{H}$ - $^1\text{H}$  NOESY) for characteristic compounds. HRMS were measured on electrospray ionization (ESI) instrument with a time-of-flight (TOF) detector. IR spectra were recorded in ATR mode. Relative intensities are indicated as follows: s (strong), m (medium), w (weak), br (broad), sh (shoulder).

Column chromatography was performed using Kieselgel 40–60  $\mu\text{m}$  60 A using ethyl acetate – petroleum ether (PE) mixture, ethyl acetate, and MeOH. Analytical thin layer chromatography was performed on silica gel plates with F 254 indicator. Visualization was accomplished with UV light and/or solution of anisaldehyde/ $\text{H}_2\text{SO}_4$  in ethanol and/or ninhydrin stain. Melting points were determined on a Koffler apparatus and are uncorrected.

Brine refers to a saturated aqueous solution of NaCl. TFE refers to 2,2,2-trifluoroethanol. Petroleum ether, ethyl acetate, MeOH, diethyl ether,  $\text{CHCl}_3$ , DMF, DMSO, THF, MeCN, PhMe,  $\text{Et}_2\text{O}$ , 1,4-dioxane, tBuOMe, TFE, EtOH, DME, AcMe,  $\text{CCl}_4$  were distilled without drying agents.  $\text{CH}_2\text{Cl}_2$  and  $\text{Et}_3\text{N}$  were distilled from  $\text{CaH}_2$ , DBU and TMG were distilled from  $\text{CaH}_2$  under reduced pressure. Most of the chemicals were acquired from commercial sources and used as received.

## 2. Synthesis of nitro compounds 3

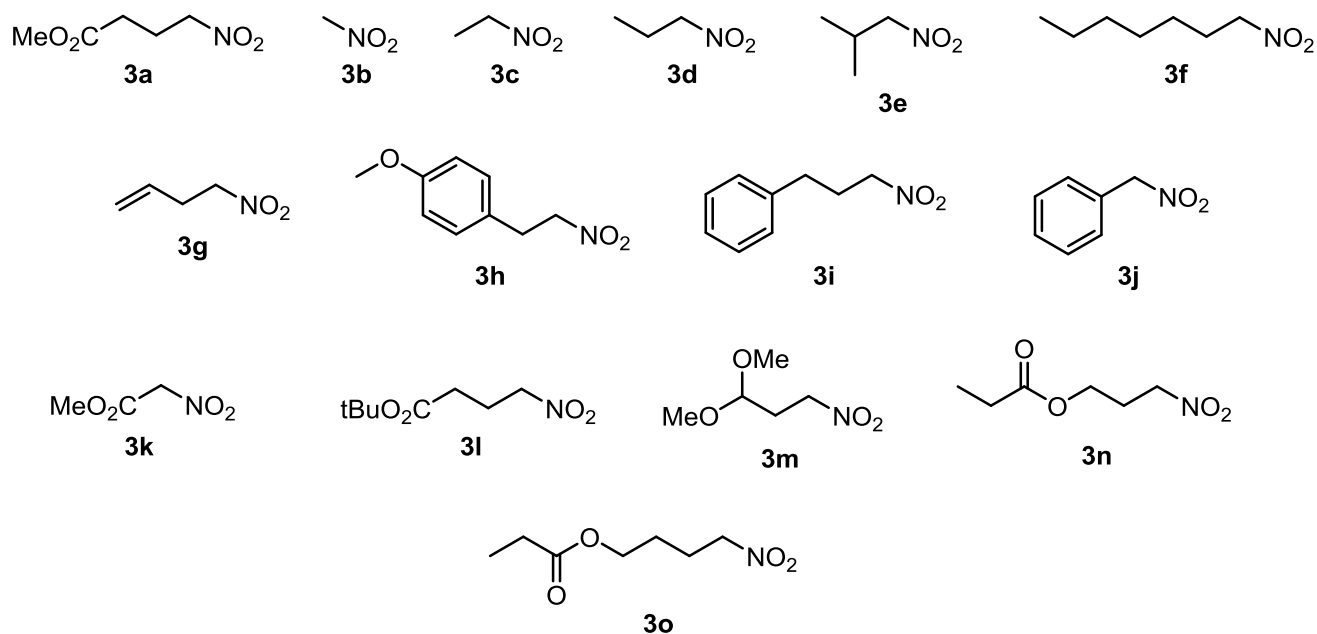

Nitro compounds **3b**, **3c**, **3d**, **3j** and **3k** were received from commercial sources.

Methyl 4-nitrobutanoate **3a**<sup>1</sup>, 2-methyl-1-nitropropane **3e**<sup>2</sup>, 2-(4-Methoxyphenyl)-1-nitroethane **3h**<sup>3</sup>, *tert*-butyl 4-nitrobutanoate **3l**<sup>4</sup>, 3-nitropropanal dimethylacetal **3m**<sup>5</sup>, 3-nitropropyl propionate **3o**<sup>6</sup> were synthesized according to literature procedures.

### Synthesis of nitro compounds **3f,g,i**<sup>7</sup>:

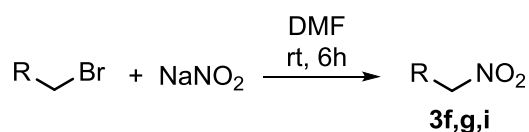

To a stirred solution of NaNO<sub>2</sub> (10.35 g, 150 mmol, 1.5 equiv.) a corresponding alkyl bromide (100 mmol, 1 equiv.) was added. Reaction mixture was stirred for 6h at room temperature. Then the mixture was diluted with water (500 mL) and extracted with Et<sub>2</sub>O (3 × 150 mL). Combined organic phase was dried over anhydrous Na<sub>2</sub>SO<sub>4</sub>. The solvent was evaporated and crude material was purified by vacuum distillation or flash column chromatography.

1-Nitroheptane **3f** was synthesized from heptyl bromide (17.9 g, 100 mmol) and sodium nitrite (10.35 g, 100 mmol), yield – 7.15 g (49%). Colorless liquid. Bp 54 – 59°C/1.0 mmHg (lit.<sup>8</sup> 60°C/1 mmHg).

<sup>1</sup>H NMR (300 MHz, CDCl<sub>3</sub>): δ 4.36 (t, J = 7.1 Hz, 2H, CH<sub>2</sub>NO<sub>2</sub>), 1.99 (p, J = 7.1 Hz, 2H, CH<sub>2</sub>), 1.41 – 1.21 (m, 8H, 4CH<sub>2</sub>), 0.92 – 0.83 (m, 3H, CH<sub>3</sub>). <sup>1</sup>H NMR spectrum was in accordance with literature data.<sup>9</sup>

4-Nitro-1-butene **3g** was synthesized from homoallyl bromide (5.05 g, 37 mmol) and sodium nitrite (3.8 g, 56 mmol), yield – 0.90 g (24%). Colorless liquid. Bp 64 – 66°C/9 mmHg.

<sup>1</sup>H NMR (300 MHz, CDCl<sub>3</sub>): δ 5.77 (ddt, J = 17.0, 10.2, 7.0 Hz, 1H, CH=CH<sub>2</sub>), 5.25 – 5.12 (m, 2H, CHCH<sub>2</sub>), 4.44 (t, J = 7.0 Hz, 2H, CH<sub>2</sub>CH<sub>2</sub>NO<sub>2</sub>), 2.75 (q, J = 7.0 Hz, 2H, CH<sub>2</sub>CH<sub>2</sub>NO<sub>2</sub>) ppm. <sup>1</sup>H NMR spectrum was in accordance with literature data.<sup>10</sup>

3-Phenyl-1-nitropropane **3i** was synthesized from 3-phenylpropyl bromide (8.7 g, 44 mmol) and sodium nitrite (5.18 g, 75 mmol). Column chromatography (PE/EtOAc 50:1) afforded **3i** as colorless oil, yield – 1.5 g (21%).  $R_f = 0.62$  (PE/EtOAc = 10:1, anisaldehyde).

$^1\text{H NMR}$  (300 MHz,  $\text{CDCl}_3$ ):  $\delta$  7.32 – 7.11 (m, 5H,  $\text{CH}_{\text{Ph}}$ ), 4.31 (t,  $J = 7.1$  Hz, 2H,  $\text{PhCH}_2\text{CH}_2\text{CH}_2$ ), 2.68 (t,  $J = 7.1$  Hz, 2H,  $\text{PhCH}_2\text{CH}_2\text{CH}_2$ ), 2.28 (p,  $J = 7.1$  Hz, 2H,  $\text{PhCH}_2\text{CH}_2\text{CH}_2$ ) ppm.  $^1\text{H NMR}$  spectrum was in accordance with literature data.<sup>11</sup>

#### Synthesis of acylated nitroalcohol **3n**<sup>6</sup>:

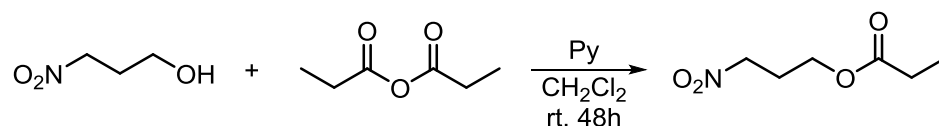

To a stirred solution of 3-nitropropanol<sup>5</sup> (202 mg, 1.9 mmol, 1 equiv.) in 4 mL of freshly distilled  $\text{CH}_2\text{Cl}_2$  propionic anhydride (245  $\mu\text{L}$ , 245 mg, 1.9 mmol, 1 equiv.) and freshly distilled pyridine (169  $\mu\text{L}$ , 165 mg, 5.7 mmol, 3 equiv.) were added. Reaction mixture was stirred for 48h at room temperature. Then the mixture was diluted with 50 mL of EtOAc and washed with 50 mL of water and 50 mL of 0.25M solution of  $\text{NaHSO}_4$ . Organic phase was dried over anhydrous  $\text{Na}_2\text{SO}_4$ . The solvent was evaporated and crude material was purified by flash column chromatography (PE/EtOAc 6:1 to 3:1), yield – 243 mg (79%). Colorless oil.  $R_f = 0.71$  (PE/EtOAc = 3:1, anisaldehyde).

$^1\text{H NMR}$  (300 MHz,  $\text{CDCl}_3$ ):  $\delta$  4.47 (t,  $J = 6.8$  Hz, 2H,  $\text{CH}_2\text{NO}_2$ ), 4.17 (t,  $J = 6.0$  Hz, 1H,  $\text{CH}_2\text{O}$ ), 2.40 – 2.24 (m, 4H,  $\text{CH}_2$  and  $\text{CH}_2\text{CH}_3$ ), 1.11 (t,  $J = 7.6$  Hz, 3H,  $\text{CH}_2\text{CH}_3$ ) ppm.

$^{13}\text{C NMR}$  (75 MHz,  $\text{CDCl}_3$ , DEPT):  $\delta$  174.2 (1C,  $\text{C}=\text{O}$ ), 72.5 (1C,  $\text{CH}_2\text{NO}_2$ ), 60.7 (1C,  $\text{CH}_2\text{O}$ ), 27.4 and 26.6 (2C,  $\text{CH}_2$  and  $\text{CH}_2\text{CH}_3$ ), 9.1 (1C,  $\text{CH}_2\text{CH}_3$ ) ppm.

**HRMS** (ESI):  $m/z$  calcd for  $\text{C}_6\text{H}_{11}\text{NaNO}_4^+$  [ $\text{M}+\text{Na}$ ]<sup>+</sup>: 184.0580, found 184.0587.

### 3. Synthesis of sulfonium salts 4

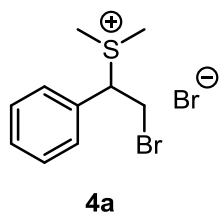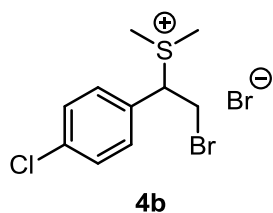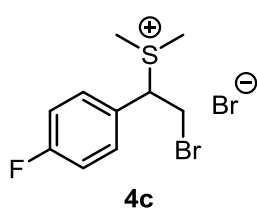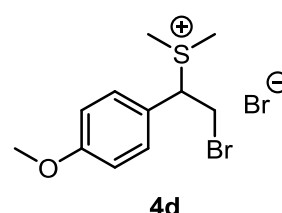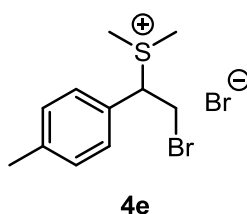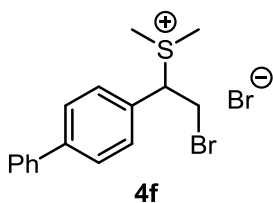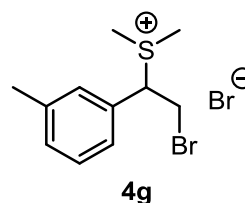

#### General procedure 1 (GP1) for the preparation of sulfonium salts 4:<sup>12,13</sup>

To a stirred solution of Me<sub>2</sub>S (7.7 mL, 6.51 g, 105 mmol, 3.5 equiv.) in 60 mL of MeCN a solution of bromine (1.6 mL, 4.8 g, 30 mmol, 1 equiv.) in 10 mL of CCl<sub>4</sub> was added at 0 °C. The mixture was stirred for 10 minutes at 0 °C. Orange solid was formed. Then corresponding styrene (60 mmol, 2 equiv.) was added and the resulting mixture was stirred at 0 °C for 30 minutes. During the reaction orange solid dissolved and white solid precipitated. To this suspension 100 mL of Et<sub>2</sub>O was added. After 30 minutes at rt resulted precipitate was filtered off, washed with Et<sub>2</sub>O and dried on filter to give pure sulfonium salt 4.

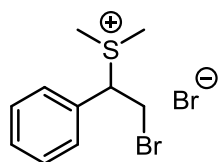

#### (2-Bromo-1-phenylethyl)dimethylsulfonium bromide 4a

Sulfonium bromide **4a** was synthesized by GP1 from styrene (6.9 mL, 6.24 g, 60 mmol), yield – 5.98 g (61%). White solid. Mp 143 – 145 °C (Et<sub>2</sub>O) (lit.<sup>13</sup> 145 – 148 °C). <sup>1</sup>H NMR spectrum was in accordance with literature data.<sup>13</sup>

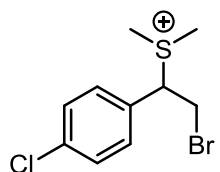

#### (2-Bromo-1-(4-chlorophenyl)ethyl)dimethylsulfonium bromide 4b

Sulfonium bromide **4b** was synthesized by GP1 from 4-chlorostyrene (508 μL, 554 mg, 4 mmol), yield – 535 mg (74%). White solid. Mp 140 – 143 °C (Et<sub>2</sub>O).

<sup>1</sup>H NMR (300 MHz, DMSO-d<sub>6</sub>): δ 7.62 (s, 4H, CH<sub>Ar</sub>), 5.43 (dd, *J* = 9.6, 6.1 Hz, 1H, CH<sub>Ar</sub>), 4.44 – 4.31 (m, 2H, CH<sub>2</sub>Br), 2.97 (s, 3H, SMe<sub>2</sub>), 2.71 (s, 3H, SMe<sub>2</sub>) ppm.

<sup>13</sup>C NMR (75 MHz, DMSO-d<sub>6</sub>, DEPT): δ 135.4 (1C, C<sub>Ar</sub>), 131.6 and 129.5 (4C, CH<sub>Ar</sub>), 129.1 (1C, C<sub>Ar</sub>), 57.6 (1C, CH<sub>Ar</sub>), 29.1 (1C, CH<sub>2</sub>Br), 24.0 and 22.7 (2C, SMe<sub>2</sub>) ppm.

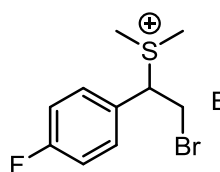

#### (2-Bromo-1-(4-fluorophenyl)ethyl)dimethylsulfonium bromide 4c

Sulfonium bromide **4c** was synthesized by GP1 from 4-fluorostyrene (477 μL, 488 mg, 4 mmol), yield – 647 mg (94%). White solid. Mp 143 – 145 °C (Et<sub>2</sub>O).

**<sup>1</sup>H NMR** (300 MHz, DMSO-d<sub>6</sub>): δ 7.66 (dd, *J* = 8.8, 5.4 Hz, 2H, CH<sub>Ar</sub>), 7.40 (t, *J* = 8.8 Hz, 2H, CH<sub>Ar</sub>), 5.45 (dd, *J* = 9.7, 6.1 Hz, 1H, CH–Ar), 4.46 – 4.31 (m, 2H, CH<sub>2</sub>Br), 2.97 (s, 3H, SMe<sub>2</sub>), 2.71 (s, 3H, SMe<sub>2</sub>) ppm.

**<sup>13</sup>C NMR** (75 MHz, DMSO-d<sub>6</sub>, DEPT): δ 163.2 (d, *J* = 248.0 Hz, 1C, C<sub>Ar</sub>), 132.1 (d, *J* = 9.0 Hz, 2C, CH<sub>Ar</sub>), 126.4 (d, *J* = 3.0 Hz, 1C, C<sub>Ar</sub>), 116.5 (d, *J* = 21.8 Hz, 2C, CH<sub>Ar</sub>), 57.7 (1C, CH–Ar), 29.3 (1C, CH<sub>2</sub>Br), 24.0 and 22.6 (2C, SMe<sub>2</sub>) ppm.

**<sup>19</sup>F NMR** (282 MHz, DMSO-d<sub>6</sub>): δ -109.78 (tt, *J* = 8.8, 5.4 Hz) ppm.

**FTIR** (ATR): 1605 (s), 1516 (s), 1421 (m), 1236 (s), 1172 (m), 1051 (m), 859 (s), 827 (m), 753 (m), 611 (s) cm<sup>-1</sup>.

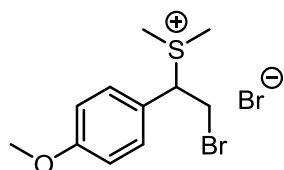

**(2-Bromo-1-(4-methoxyphenyl)ethyl)dimethylsulfonium bromide 4d**

Sulfonium bromide **4d** was synthesized by GP1 from 4-methoxystyrene (508 μL, 554 mg, 4 mmol), yield – 535 mg (74%). White solid. Mp 107 – 109 °C (Et<sub>2</sub>O).

We were unable to characterize this compound by NMR due to its decomposition in DMSO-d<sub>6</sub> (cf.<sup>12</sup>)

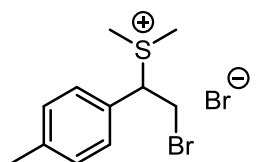

**(2-Bromo-1-(p-tolyl)ethyl)dimethylsulfonium bromide 4e**

Sulfonium bromide **4e** was synthesized by GP1 from 4-methylstyrene (526 μL, 472 mg, 4 mmol), yield – 616 mg (91%). White solid. Mp 139 – 141 °C (Et<sub>2</sub>O) (lit.<sup>14</sup> 145 – 148 °C).

**<sup>1</sup>H NMR** (300 MHz, DMSO-d<sub>6</sub>): δ 7.45 (d, *J* = 8.1 Hz, 2H, CH<sub>Ar</sub>), 7.34 (d, *J* = 8.1 Hz, 2H, CH<sub>Ar</sub>), 5.36 (dd, *J* = 9.8, 6.0 Hz, 1H, CH–Ar), 4.42 – 4.28 (m, 2H, CH<sub>2</sub>Br), 2.94 (s, 3H, SMe<sub>2</sub>), 2.66 (s, 3H, SMe<sub>2</sub>), 2.35 (s, 3H, Me<sub>Ar</sub>) ppm.

**<sup>13</sup>C NMR** (75 MHz, DMSO-d<sub>6</sub>, DEPT): δ 140.3 (1C, C<sub>Ar</sub>), 130.0 and 129.6 (4C, CH<sub>Ar</sub>), 126.9 (1C, C<sub>Ar</sub>), 58.5 (1C, CH–Ar), 29.4 (1C, CH<sub>2</sub>Br), 24.0 and 22.6 (2C, SMe<sub>2</sub>), 20.9 (1C, Me<sub>Ar</sub>) ppm.

**FTIR** (ATR): 2976 (m), 1610 (w), 1514 (m), 1450 (m), 1211 (m), 1189 (m), 1051 (s), 1005 (s), 827 (s), 744 (9s), 620 (s) cm<sup>-1</sup>.

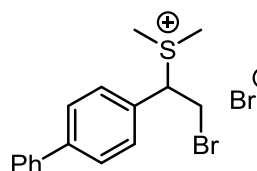

**(1-([1,1'-Biphenyl]-4-yl)-2-bromoethyl)dimethylsulfonium bromide 4f**

Sulfonium bromide **4f** was synthesized by GP1 from 4-phenylstyrene (720 mg, 4 mmol), yield – 662 mg (82%). White solid. Mp 131 – 133 °C (Et<sub>2</sub>O).

**<sup>1</sup>H NMR** (300 MHz, DMSO-d<sub>6</sub>): δ 7.84 (d, *J* = 8.3 Hz, 2H, CH<sub>Ar</sub>), 7.74 (d, *J* = 7.3 Hz, 2H, CH<sub>Ar</sub>), 7.67 (d, *J* = 8.3 Hz, 2H, H<sub>Ar</sub>), 7.49 (t, *J* = 7.3 Hz, 3H, H<sub>Ar</sub>), 7.42 (d, *J* = 7.3 Hz, 2H, H<sub>Ar</sub>), 5.47 (dd, *J* = 9.0, 6.6 Hz, 1H, CH–Ar), 4.49 – 4.35 (m, 2H, CH<sub>2</sub>Br), 2.99 (s, 3H, SMe<sub>2</sub>), 2.74 (s, 3H, SMe<sub>2</sub>) ppm.

**<sup>13</sup>C NMR** (75 MHz, DMSO-d<sub>6</sub>, DEPT): δ 142.0 and 138.9 (2C, C<sub>Ar</sub>), 130.3 (2C, CH<sub>Ar</sub>), 129.2 (2C, CH<sub>Ar</sub>), 129.1 (1C, C<sub>Ar</sub>), 128.2 (1C, CH<sub>Ar</sub>), 127.6 (2C, CH<sub>Ar</sub>), 126.9 (2C, CH<sub>Ar</sub>), 58.3 (1C, CH–Ar), 29.3 (1C, CH<sub>2</sub>Br), 24.0 and 22.7 (2C, SMe<sub>2</sub>) ppm.

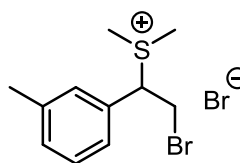

**(2-Bromo-1-(*m*-tolyl)ethyl)dimethylsulfonium bromide 4g**

Sulfonium bromide **4g** was synthesized by GP1 from 3-methylstyrene (530  $\mu$ L, 472 mg, 4 mmol), yield – 433 mg (64%). White solid. Mp 122 – 125  $^{\circ}$ C (Et<sub>2</sub>O).

**<sup>1</sup>H NMR** (300 MHz, DMSO-d<sub>6</sub>):  $\delta$  7.46 – 7.31 (m, 4H, CH<sub>Ar</sub>), 5.31 (dd,  $J$  = 9.8, 5.8 Hz, 1H, CH-Ar), 4.42 – 4.29 (m, 2H, CH<sub>2</sub>Br), 2.95 (s, 3H, SMe<sub>2</sub>), 2.67 (s, 3H, SMe<sub>2</sub>), 2.36 (s, 3H, Me<sub>Ar</sub>) ppm.

**<sup>13</sup>C NMR** (75 MHz, DMSO-d<sub>6</sub>, DEPT):  $\delta$  139.0 (2C, C<sub>Ar</sub>), 131.2, 130.0, 129.3 and 126.8 (4C, CH<sub>Ar</sub>), 58.6 (1C, CH-Ar), 29.3 (1C, CH<sub>2</sub>Br), 24.0 and 22.8 (2C, SMe<sub>2</sub>), 21.1 (1C, Me<sub>Ar</sub>) ppm.

**FTIR** (ATR): 3010 (w), 22987 (m), 2953 (m), 1606 (m), 1491 (m), 1437 (s), 1416 (m), 1233 (m), 1209 (s), 1152 (w), 1047 (s), 1101 (9s), 855 (w), 797 (s), 739 (s), 723 (s), 711 (s), 693 (s), 567 (m) cm<sup>-1</sup>.



#### 4. Optimization study

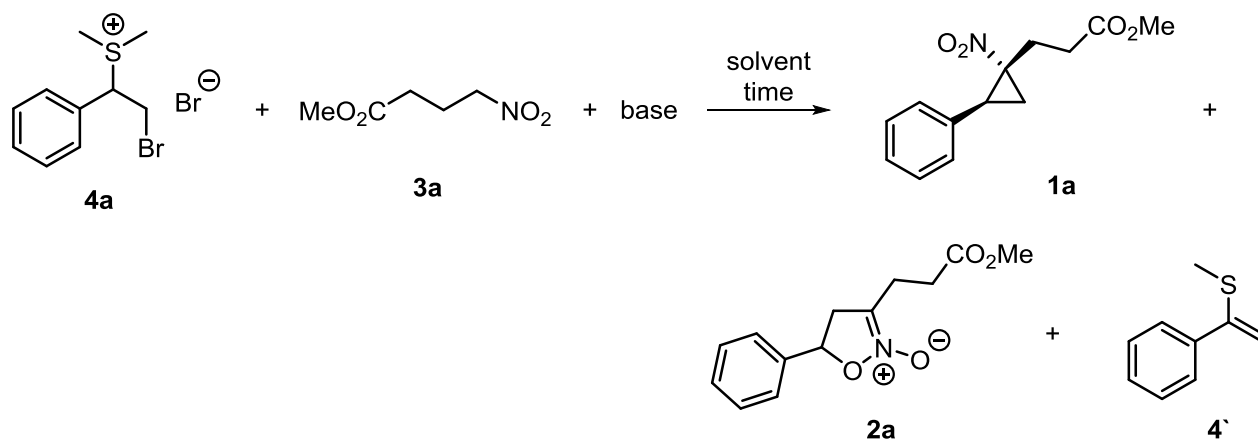

#### General procedure for optimization studies:

To a stirred suspension or solution of sulfonium salt **4a** (indicated amount) in 0.4 mL of solvent nitro compound **3a** (29 mg, 0.2 mmol, 1 equiv.) and base (indicated amount) were added and the reaction mixture was stirred under indicated conditions (temperature and time). Then dimethyl terephthalate (0.5 equiv., 0.1 mmol, 19 mg) was added to the mixture as internal standard. This mixture was diluted with 5 mL of EtOAc and washed with 5 mL of 0.25M aq. solution of NaHSO<sub>4</sub>. Aqueous layer was back extracted with 5 mL of EtOAc. Combined organic layer was dried over Na<sub>2</sub>SO<sub>4</sub> and the solvent was evaporated under reduced pressure. The crude material was analyzed by <sup>1</sup>H NMR using signal of dimethyl terephthalate at 8.09 ppm as standard.

Table 1.

| Entry | 4a       | Base          | Solvent                                | Time | Temperature | 3a, % | 4', % | 2a, % | 1a |
|-------|----------|---------------|----------------------------------------|------|-------------|-------|-------|-------|----|
| 1     | 1 equiv. | DBU, 2 equiv. | CHCl <sub>3</sub> , 0.5M               | 14h  | rt          | 0     | 0     | 39    | 59 |
| 2     | 1 equiv. | DBU, 2 equiv. | DMF, 0.5M                              | 14h  | rt          | 0     | 0     | 32    | 58 |
| 3     | 1 equiv. | DBU, 2 equiv. | THF, 0.5M                              | 14h  | rt          | 7     | 0     | 10    | 74 |
| 4     | 1 equiv. | DBU, 2 equiv. | MeCN, 0.5M                             | 14h  | rt          | 9     | 0     | 41    | 42 |
| 5     | 1 equiv. | DBU, 2 equiv. | CH <sub>2</sub> Cl <sub>2</sub> , 0.5M | 14h  | rt          | 6     | 0     | 35    | 56 |
| 6     | 1 equiv. | DBU, 2 equiv. | PhMe, 0.5M                             | 14h  | rt          | 5     | 0     | 18    | 78 |
| 7     | 1 equiv. | DBU, 2 equiv. | EtOAc, 0.5M                            | 14h  | rt          | 5     | 0     | 9     | 78 |
| 8     | 1 equiv. | DBU, 2 equiv. | Et <sub>2</sub> O, 0.5M                | 14h  | rt          | 5     | 2     | 33    | 53 |
| 9     | 1 equiv. | DBU, 2 equiv. | 1,4-dioxane, 0.5M                      | 14h  | rt          | 10    | 4     | 26    | 56 |
| 10    | 1 equiv. | DBU, 2 equiv. | tBuOMe, 0.5M                           | 14h  | rt          | 25    | 5     | 35    | 40 |

**Table 1.** (continued)

| Entry | 4a         | Base                             | Solvent    | Time | Temperature | 3a, % | 4', % | 2a, % | 1a |
|-------|------------|----------------------------------|------------|------|-------------|-------|-------|-------|----|
| 11    | 1 equiv.   | DBU,<br>2 equiv.                 | TFE, 0.5M  | 14h  | rt          | 24    | 0     | 60    | 10 |
| 12    | 1 equiv.   | DBU,<br>2 equiv.                 | EtOH, 0.5M | 14h  | rt          | 5     | 0     | 64    | 26 |
| 13    | 1 equiv.   | DBU,<br>2 equiv.                 | DME, 0.5M  | 14h  | rt          | 7     | 0     | 14    | 66 |
| 14    | 1 equiv.   | DBU,<br>2 equiv.                 | AcMe, 0.5M | 14h  | rt          | 8     | 2     | 31    | 48 |
| 15    | 1 equiv.   | DBN,<br>2 equiv.                 | EA, 0.5M   | 14h  | rt          | 8     | 0     | 40    | 40 |
| 16    | 1 equiv.   | Et <sub>3</sub> N,<br>2 equiv.   | EA, 0.5M   | 14h  | rt          | 27    | 14    | 26    | 36 |
| 17    | 1 equiv.   | DBU,<br>2.2 equiv.               | EA, 0.5M   | 14h  | rt          | 2     | 0     | 10    | 85 |
| 18    | 1.1 equiv. | DBU,<br>2.3 equiv.               | EA, 0.5M   | 14h  | rt          | 0     | 0     | 10    | 90 |
| 19    | 1.2 equiv. | DBU,<br>2.4 equiv.               | EA, 0.5M   | 14h  | rt          | 0     | 9     | 10    | 86 |
| 20    | 1.5 equiv. | DBU,<br>2.7 equiv.               | EA, 0.5M   | 14h  | rt          | 0     | 30    | 11    | 84 |
| 21    | 1.1 equiv. | DBU,<br>2.3 equiv.               | EA, 0.5M   | 1h   | rt          | 0     | 3     | 9     | 84 |
| 22    | 1.1 equiv. | DBU,<br>2.3 equiv.               | EA, 0.5M   | 2h   | rt          | 0     | 3     | 10    | 83 |
| 23    | 1.1 equiv. | DBU,<br>2.3 equiv.               | EA, 0.5M   | 4h   | rt          | 0     | 5     | 11    | 85 |
| 24    | 1.5 equiv. | DBU,<br>2.7 equiv.               | TFE, 0.5M  | 14h  | rt          | 0     | 0     | 74    | 10 |
| 25    | 1.5 equiv. | PS,<br>2.7 equiv.                | TFE, 0.5M  | 14h  | rt          | 0     | 0     | 82    | 10 |
| 26    | 1.5 equiv. | TMG,<br>2.7 equiv.               | TFE, 0.5M  | 14h  | rt          | 0     | 0     | 80    | 10 |
| 27    | 1.5 equiv. | DBN,<br>2.7 equiv.               | TFE, 0.5M  | 14h  | rt          | 10    | 1     | 74    | 10 |
| 28    | 1.5 equiv. | Et <sub>3</sub> N,<br>2.7 equiv. | TFE, 0.5M  | 14h  | rt          | 15    | 6     | 80    | 10 |
| 29    | 1.7 equiv. | Et <sub>3</sub> N,<br>2.9 equiv. | TFE, 0.5M  | 14h  | rt          | 4     | 9     | 80    | 10 |
| 30    | 2.0 equiv. | Et <sub>3</sub> N,<br>3.2 equiv. | TFE, 0.5M  | 14h  | rt          | 4     | 16    | 80    | 10 |
| 31    | 2.0 equiv. | Et <sub>3</sub> N,<br>3.2 equiv. | TFE, 0.5M  | 1h   | rt          | 11    | 4     | 75    | 10 |

**Table 1.** (continued)

| Entry | 4a         | Base                                          | Solvent                                            | Time | Temperature | 3a, % | 4', % | 2a, % | 1a |
|-------|------------|-----------------------------------------------|----------------------------------------------------|------|-------------|-------|-------|-------|----|
| 32    | 2.0 equiv. | Et <sub>3</sub> N,<br>3.2 equiv.              | TFE, 0.5M                                          | 2h   | rt          | 9     | 7     | 84    | 10 |
| 33    | 2.0 equiv. | Et <sub>3</sub> N,<br>3.2 equiv.              | TFE, 0.5M                                          | 4h   | rt          | 4     | 2     | 89    | 10 |
| 34    | 1.0 equiv. | K <sub>2</sub> CO <sub>3</sub> ,<br>5 equiv.  | CHCl <sub>3</sub> /H <sub>2</sub> O<br>(3:1), 0.5M | 14h  | rt          | 68    | 55    | 0     | 6  |
| 35    | 1.0 equiv. | K <sub>2</sub> CO <sub>3</sub> ,<br>5 equiv.  | AcMe/H <sub>2</sub> O<br>(3:1), 0.5M               | 14h  | rt          | 57    | 57    | 5     | 11 |
| 36    | 1.0 equiv. | tBuONa,<br>2 equiv.                           | THF, 0.5M                                          | 14h  | rt          | 36    | 19    | 12    | 42 |
| 37    | 1.0 equiv. | Cs <sub>2</sub> CO <sub>3</sub> ,<br>5 equiv. | DMF, 0.5M                                          | 14h  | rt          | 14    | 23    | 12    | 45 |
| 38    | 1.0 equiv. | K <sub>2</sub> CO <sub>3</sub> ,<br>2 equiv.  | DMSO, 0.5M                                         | 14h  | rt          | 24    | 20    | 14    | 35 |

## 5. Synthesis of nitro cyclopropanes 1

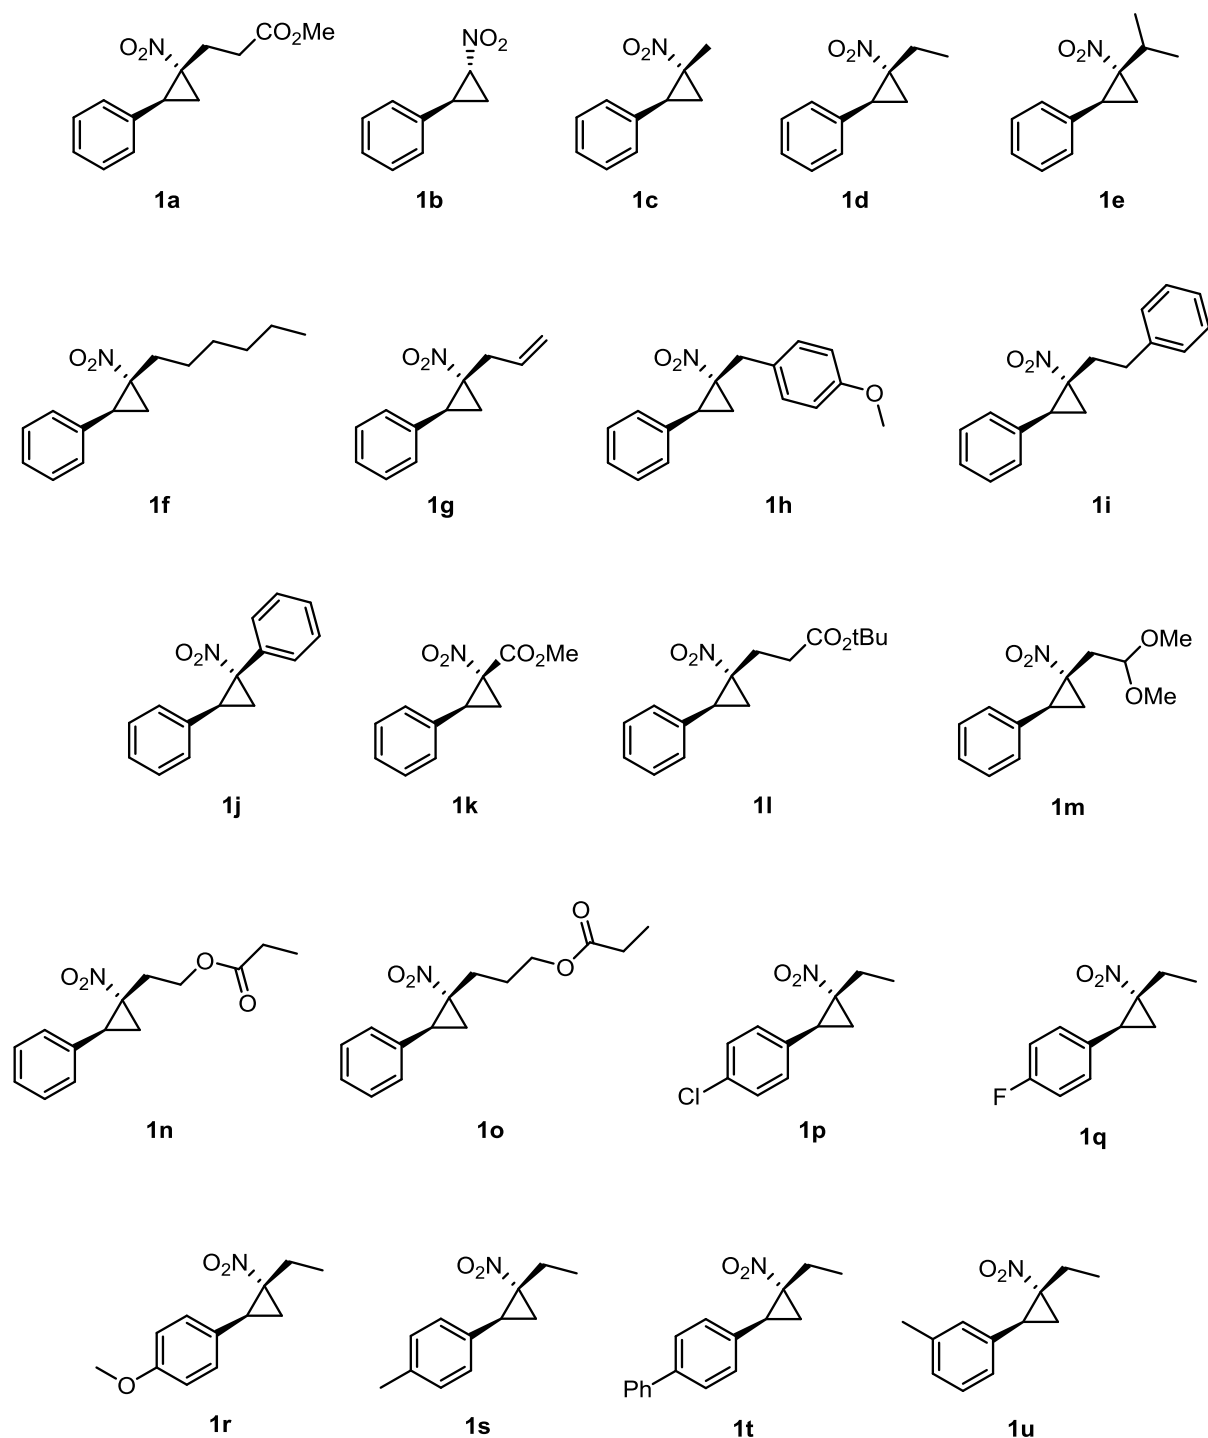

### General procedure 2 (GP2) for preparation of nitro cyclopropanes 1:

To a stirred suspension of sulfonium salt **4** (0.55 mmol, 1.1 equiv) in 1 mL of EtOAc nitro compound **3** (0.5 mmol, 1 equiv.) and DBU (172  $\mu$ L, 175 mg, 1.15 mmol, 2.3 equiv.) were added and the reaction mixture was stirred for 1 h at rt. Then the mixture was diluted with 25 mL of EtOAc and washed with 25 mL of 0.25M solution of NaHSO<sub>4</sub>. Aqueous layer was back extracted with 25 mL of EtOAc. Combined organic layers were dried over Na<sub>2</sub>SO<sub>4</sub> and the solvent was evaporated under reduced pressure. The crude material was subjected to column chromatography (PE/EtOAc 100:1 to 5:1) to give pure nitro cyclopropane **1**.

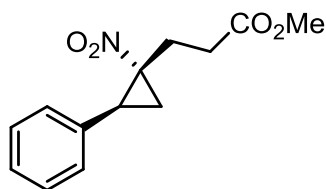

**Rel methyl 3-((1*R*,2*S*)-1-nitro-2-phenylcyclopropyl)propanoate 1a**

Cyclopropane **1a** was synthesized by **GP2** from methyl nitrobutyrate **3a** (147 mg, 1 mmol) and sulfonium bromide **4a** (359 mg, 1.1 mmol), yield – 210 mg (84%). Colorless oil.  $R_f = 0.76$  (PE/EtOAc = 3:1, anisaldehyde).

$^1\text{H NMR}$  (300 MHz,  $\text{CDCl}_3$ , COSY):  $\delta$  7.41 – 7.29 (m, 3H,  $\text{CH}_{\text{Ph}}$ ), 7.25 – 7.18 (m, 2H,  $\text{CH}_{\text{Ph}}$ ), 3.63 (s, 3H,  $\text{OCH}_3$ ), 3.38 (dd,  $J = 10.4, 8.4$  Hz, 1H,  $\text{CH-Ph}$ ), 2.53 – 2.42 and 2.42 – 2.31 (2m, 4H,  $\text{CH}_{2a}$  and  $\text{CH}_{2a}\text{CH}_2\text{CO}_2\text{Me}$ ), 1.80 – 1.60 (m, 2H,  $\text{CH}_{2b}$  and  $\text{CH}_{2b}\text{CH}_2\text{CO}_2\text{Me}$ ) ppm.  
 $^{13}\text{C NMR}$  (75 MHz,  $\text{CDCl}_3$ , DEPT):  $\delta$  172.9 (1C,  $\text{C=O}$ ), 134.0 (1C,  $\text{C}_{\text{Ph}}$ ), 128.9, 128.8 and 128.1 (5C,  $\text{CH}_{\text{Ph}}$ ), 69.2 (1C,  $\text{CNO}_2$ ), 51.8 (1C,  $\text{OCH}_3$ ), 35.7 (1C,  $\text{CH-Ph}$ ), 30.4 (1C,  $\text{CH}_2\text{CH}_2\text{CO}_2\text{Me}$ ), 24.1 (1C,  $\text{CH}_2\text{CH}_2\text{CO}_2\text{Me}$ ), 20.5 (1C,  $\text{CH}_2$ ) ppm.

**HRMS** (ESI):  $m/z$  calcd for  $\text{C}_{13}\text{H}_{16}\text{NO}_4^+$   $[\text{M}+\text{H}]^+$ : 250.1074, found 250.1071.

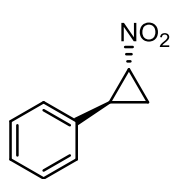

**Rel ((1*S*,2*R*)-2-nitrocyclopropyl)benzene 1b**

Cyclopropane **1a** was synthesized by **GP2** from nitromethane **3b** (61 mg, 1 mmol) and sulfonium bromide **4a** (359 mg, 1.1 mmol), yield – 115 mg (71%). Colorless oil.  $R_f = 0.76$  (PE/EtOAc = 5:1, anisaldehyde).

$^1\text{H NMR}$  (300 MHz,  $\text{CDCl}_3$ , COSY):  $\delta$  7.40 – 7.28 (m, 3H,  $\text{CH}_{\text{Ph}}$ ), 7.13 (dd,  $J = 7.8, 1.7$  Hz, 2H,  $\text{CH}_{\text{Ph}}$ ), 4.42 (ddd,  $J = 7.1, 4.0, 3.0$  Hz, 1H,  $\text{CHNO}_2$ ), 3.14 (ddd,  $J = 10.7, 7.9, 3.0$  Hz, 1H,  $\text{CH}_{2a}$ ), 2.25 (ddd,  $J = 10.7, 6.3, 4.0$  Hz, 1H,  $\text{CH-Ph}$ ), 1.68 (ddd,  $J = 7.9, 7.3, 6.3$  Hz, 1H,  $\text{CH}_{2a}$ ).  $^1\text{H NMR}$  spectrum was in accordance with literature data.<sup>15</sup>

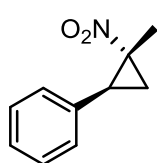

**Rel ((1*S*,2*R*)-2-methyl-2-nitrocyclopropyl)benzene 1c**

Cyclopropane **1a** was synthesized by **GP2** from nitroethane **3c** (75 mg, 1 mmol) and sulfonium bromide **4a** (359 mg, 1.1 mmol), yield – 210 mg (83%). Colorless oil.  $R_f = 0.77$  (PE/EtOAc = 3:1, anisaldehyde).

$^1\text{H NMR}$  (300 MHz,  $\text{CDCl}_3$ ):  $\delta$  6.60 – 6.46 (m, 3H,  $\text{CH}_{\text{Ph}}$ ), 6.42 – 6.35 (m, 2H,  $\text{CH}_{\text{Ph}}$ ), 2.57 (m, 1H,  $\text{CH-Ph}$ ), 1.55 (dd,  $J = 10.7, 5.7$  Hz, 1H,  $\text{CH}_{2a}$ ), 0.77 (dt,  $J = 8.2, 5.7$  Hz, 1H,  $\text{CH}_{2b}$ ), 0.64 (s, 3H,  $\text{CH}_3$ ) ppm.

$^{13}\text{C NMR}$  (75 MHz,  $\text{CDCl}_3$ , DEPT):  $\delta$  134.6 (1C,  $\text{C}_{\text{Ph}}$ ), 128.9, 128.8 and 127.9 (5C,  $\text{CH}_{\text{Ph}}$ ), 65.6 (1C,  $\text{CNO}_2$ ), 34.9 (1C,  $\text{CH-Ph}$ ), 22.1 (1C,  $\text{CH}_2$ ), 15.3 (1C,  $\text{CH}_3$ ) ppm.

**HRMS** (ESI):  $m/z$  calcd for  $\text{C}_{10}\text{H}_{12}\text{NO}_2^+$   $[\text{M}+\text{H}]^+$ : 178.0863, found 178.0868.

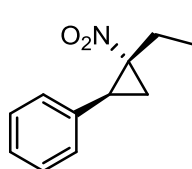

**Rel ((1*S*,2*R*)-2-ethyl-2-nitrocyclopropyl)benzene 1d**

Cyclopropane **1d** was synthesized by **GP2** from 1-nitropropane **3d** (89 mg, 1 mmol) and sulfonium bromide **4a** (359 mg, 1.1 mmol), yield – 168 mg (88%). White solid. Mp 48 – 50 °C (from  $\text{Et}_2\text{O}$ ).  $R_f = 0.82$  (PE/EtOAc = 3:1, anisaldehyde).

Scale up procedure: cyclopropane **1a** was synthesized by **GP2** from 1-nitropropane **3d** (623 mg, 7 mmol) and sulfonium bromide **4a** (2.51 g, 7.7 mmol), yield – 1.02 g (76%).

$^1\text{H NMR}$  (300 MHz,  $\text{CDCl}_3$ , NOESY):  $\delta$  7.41 – 7.31 (m, 3H,  $\text{CH}_{\text{Ph}}$ ), 7.24 – 7.18 (m, 2H,  $\text{CH}_{\text{Ph}}$ ), 3.38 (dd,  $J = 10.3, 8.3$  Hz, 1H,  $\text{CH-Ph}$ ), 2.35 (ddd,  $J = 10.3, 6.0, 1.7$  Hz, 1H,  $\text{CH}_{2a}$  anti to Ph), 2.16 (dq,  $J = 14.5, 7.1, 1.7$  Hz, 1H,  $\text{CH}_{2a}\text{CH}_3$ ), 1.56 (dd,  $J = 8.3, 6.0$  Hz, 1H,  $\text{CH}_{2b}$  syn to Ph), 1.30 (dq,  $J = 14.5$

7.3 Hz, 1H,  $\underline{\text{CH}}_{2\text{b}}\text{CH}_3$ ), 0.98 (t,  $J = 7.2$  Hz, 3H,  $\text{CH}_2\underline{\text{CH}}_3$ ) ppm. **Characteristic NOESY correlations:**  $\underline{\text{CH}}_2\text{CH}_3/\underline{\text{CH}}_{\text{Ph}}$ ;  $\underline{\text{CH}}_{\text{Ph}}/\underline{\text{CH}}_{2\text{b}}$  syn to Ph;  $\underline{\text{CH}}_2\text{CH}_3/\underline{\text{CH}}_{2\text{b}}$  syn to Ph.

$^{13}\text{C}$  NMR (75 MHz,  $\text{CDCl}_3$ , DEPT, HSQC):  $\delta$  134.7 (1C,  $\underline{\text{C}}_{\text{Ph}}$ ), 128.9, 128.7 and 127.9 (5C,  $\underline{\text{C}}_{\text{HPh}}$ ), 71.0 (1C,  $\underline{\text{C}}_{\text{NO}_2}$ ), 35.6 (1C,  $\underline{\text{C}}_{\text{H-Ph}}$ ), 22.2 (1C,  $\underline{\text{C}}_{\text{H}_2\text{CH}_3}$ ), 20.1 (1C,  $\underline{\text{C}}_{\text{H}_2}$ ), 10.2 (1C,  $\text{CH}_2\underline{\text{CH}}_3$ ) ppm.

**FTIR** (ATR): 2979 (br), 2945 (br), 1821 (br), 1524 (s), 1497 (m), 1458 (m), 1448 (m), 1350 (s), 1276 (m), 1080 (w), 1055 (w), 869 (m), 787 (m), 765 (s), 697 (s), 605 (m)  $\text{cm}^{-1}$ .

**HRMS** (ESI):  $m/z$  calcd for  $\text{C}_{11}\text{H}_{13}\text{NaNO}_2^+ [\text{M}+\text{Na}]^+$ : 214.0838, found 214.0830.

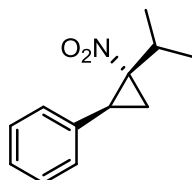

**Rel ((1S,2S)-2-isopropyl-2-nitrocyclopropyl)benzene 1e**

Cyclopropane **1e** was synthesized by **GP2** from 2-methyl-1-nitropropane **3e** (103 mg, 1 mmol) and sulfonium bromide **4a** (359 mg, 1.1 mmol). Column chromatography (PE/EtOAc, 100:1, then 3:1, then 1:1) afforded target cyclopropane **1e** (93 mg, 45%) and isoxazoline *N*-oxide **2e** (98 mg, 48%) as colorless oils.

Mixture of diastereomers with  $dr = 7:1$ .

$R_f = 0.56$  (PE/EtOAc = 100:1, anisaldehyde).

$^1\text{H}$  NMR (300 MHz,  $\text{CDCl}_3$ , COSY, NOESY):  $\delta$  7.42 – 7.19 (m, 5H,  $\underline{\text{C}}_{\text{HPh}}$ ), 3.48 (dd,  $J = 10.4, 8.3$  Hz, 1H,  $\underline{\text{C}}_{\text{H-Ph}}$ ), 2.21 (dd,  $J = 10.4, 6.0$  Hz, 1H,  $\underline{\text{C}}_{\text{H}_{2\text{a}}}$ ), 1.59 (dd,  $J = 8.3, 6.0$  Hz, 1H,  $\underline{\text{C}}_{\text{H}_{2\text{b}}}$ ), 1.47 – 1.32 (m, 1H,  $\underline{\text{C}}_{\text{HMe}_2}$ ), 1.25 (d,  $J = 6.9$  Hz, 3H,  $\underline{\text{C}}_{\text{H}_3}$ ), 0.98 (d,  $J = 6.9$  Hz, 3H,  $\underline{\text{C}}_{\text{H}_3}$ ) ppm. Characteristic signals of minor diastereomer: 3.32 (dd,  $J = 10.5, 8.4$  Hz, 1H,  $\underline{\text{C}}_{\text{H-Ph}}$ ), 2.40 (ddd,  $J = 10.5, 6.1, 1.7$  Hz, 1H,  $\underline{\text{C}}_{\text{H}_{2\text{a}}}$ ), 0.83 (m, 3H,  $\underline{\text{C}}_{\text{H}_3}$ ) ppm. **Characteristic NOESY correlations:**  $\underline{\text{C}}_{\text{HMe}_2}/\underline{\text{C}}_{\text{HPh}}$ ;  $\underline{\text{C}}_{\text{H}_{2\text{b}}}/\underline{\text{C}}_{\text{HPh}}$ ;  $\text{CH}_3/\underline{\text{C}}_{\text{HPh}}$ .

$^{13}\text{C}$  NMR (75 MHz,  $\text{CDCl}_3$ , DEPT, HSQC):  $\delta$  134.2 (1C,  $\underline{\text{C}}_{\text{Ph}}$ ), 129.0, 128.6 and 127.8 (5C,  $\underline{\text{C}}_{\text{HPh}}$ ), 73.9 (1C,  $\underline{\text{C}}_{\text{NO}_2}$ ), 35.4 (1C,  $\underline{\text{C}}_{\text{H-Ph}}$ ), 29.7 (1C,  $\underline{\text{C}}_{\text{HMe}_2}$ ), 20.9 (1C,  $\underline{\text{C}}_{\text{H}_2}$ ), 18.7 and 17.2 (2C,  $\underline{\text{C}}_{\text{HMe}_2}$ ) ppm.

**HRMS** (ESI):  $m/z$  calcd for  $\text{C}_{12}\text{H}_{16}\text{NO}_2^+ [\text{M}+\text{H}]^+$ : 206.1176, found 206.1170.

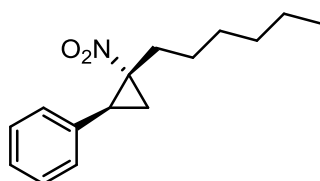

**Rel ((1S,2R)-2-hexyl-2-nitrocyclopropyl)benzene 1f**

Cyclopropane **1f** was synthesized by **GP2** from 1-nitroheptane **3f** (145 mg, 1 mmol) and sulfonium bromide **4a** (359 mg, 1.1 mmol), yield – 193 mg (78%). Colorless oil.  $R_f = 0.89$  (PE/EtOAc = 20:1, anisaldehyde).

$^1\text{H}$  NMR (300 MHz,  $\text{CDCl}_3$ ):  $\delta$  7.41 – 7.30 (m, 3H,  $\underline{\text{C}}_{\text{HPh}}$ ), 7.23 – 7.18 (m, 2H,  $\underline{\text{C}}_{\text{HPh}}$ ), 3.33 (dd,  $J = 10.4, 8.3$  Hz, 1H,  $\underline{\text{C}}_{\text{H-Ph}}$ ), 2.37 (ddd,  $J = 10.4, 6.1, 1.7$  Hz, 1H,  $\underline{\text{C}}_{\text{H}_{2\text{a}}}$ ), 2.18 – 2.07 (m, 1H,  $\underline{\text{C}}_{\text{H}_2$  of hexyl), 1.57 (dd,  $J = 8.3, 6.1$  Hz, 1H,  $\underline{\text{C}}_{\text{H}_{2\text{b}}}$ ), 1.46 – 1.31 (m, 2H,  $\underline{\text{C}}_{\text{H}_2$  of hexyl), 1.29 – 1.11 (m, 7H,  $\underline{\text{C}}_{\text{H}_2$  of hexyl), 0.85 (t,  $J = 6.8$  Hz, 3H,  $\underline{\text{C}}_{\text{H}_3}$ ) ppm.

$^{13}\text{C}$  NMR (75 MHz,  $\text{CDCl}_3$ , DEPT):  $\delta$  134.7 (1C,  $\underline{\text{C}}_{\text{Ph}}$ ), 128.9, 128.7 and 127.9 (5C,  $\underline{\text{C}}_{\text{HPh}}$ ), 70.3 (1C,  $\underline{\text{C}}_{\text{NO}_2}$ ), 35.3 (1C,  $\underline{\text{C}}_{\text{H-Ph}}$ ), 31.5, 29.1, 28.7, 25.8 and 22.5 (5C,  $\underline{\text{C}}_{\text{H}_2$  of hexyl), 20.2 (1C,  $\underline{\text{C}}_{\text{H}_2}$ ), 14.1 (1C,  $\underline{\text{C}}_{\text{H}_3}$ ) ppm.

**HRMS** (ESI):  $m/z$  calcd for  $\text{C}_{15}\text{H}_{22}\text{NO}_2^+ [\text{M}+\text{H}]^+$ : 248.1645, found 248.1646.

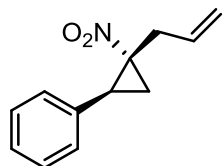

**Rel ((1S,2R)-2-allyl-2-nitrocyclopropyl)benzene 1g**

Cyclopropane **1g** was synthesized by **GP2** from 4-nitro-1-butene **3g** (101 mg, 1 mmol) and sulfonium bromide **4a** (359 g, 1.1 mmol), yield – 150 mg (75%).

Colorless oil.  $R_f = 0.61$  (PE/EtOAc = 50:1, anisaldehyde). Mixture of diastereomers with dr = 16:1.

$^1\text{H NMR}$  (300 MHz,  $\text{CDCl}_3$ , COSY, NOESY):  $\delta$  7.39 – 7.30 (m, 3H,  $\text{CH}_{\text{Ph}}$ ), 7.23 – 7.17 (m, 2H,  $\text{CH}_{\text{Ph}}$ ), 5.76 (ddt,  $J = 17.0, 10.4, 6.5$  Hz, 1H,  $\text{CH}=\text{CH}_2$ ), 5.04 (dq,  $J = 10.4, 1.5$  Hz, 1H,  $\text{CH}=\text{CH}_{2a}$ ), 4.98 (dq,  $J = 17.0, 1.5$  Hz, 1H,  $\text{CH}=\text{CH}_{2b}$ ), 3.39 (dd,  $J = 10.4, 8.4$  Hz, 1H,  $\text{CH}-\text{Ph}$ ), 2.94 (ddd,  $J = 16.1, 6.1, 1.5$  Hz, 1H,  $\text{CH}_{2a}\text{CH}=\text{CH}_2$ ), 2.38 (ddd,  $J = 10.5, 6.2, 1.7$  Hz, 1H,  $\text{CH}_{2a}$ ), 1.92 (ddt,  $J = 16.1, 6.8, 1.5$  Hz, 1H,  $\text{CH}_{2b}\text{CH}=\text{CH}_2$ ), 1.62 (dd,  $J = 8.4, 6.2$  Hz, 1H,  $\text{CH}_{2b}$ ) ppm. Characteristic signals of minor diastereomer:  $\delta$  6.00 – 5.86 (m, 1H,  $\text{CH}=\text{CH}_2$ ), 5.32 – 5.18 (m, 2H, 1H,  $\text{CH}=\text{CH}_2$ ), 2.76 – 2.68 (m, 1H), 2.68 – 2.57 (m, 1H) ppm.

**Characteristic NOESY correlations:**  $\text{CH}_2\text{CH}=\text{CH}_2/\text{CH}_{\text{Ph}}$ ;  $\text{CH}_{2b}/\text{CH}_{\text{Ph}}$ ;  $\text{CH}_{2a}/\text{CH}-\text{Ph}$ ;  $\text{CH}_{2b}/\text{CH}_{2b}\text{CH}=\text{CH}_2$ .

$^{13}\text{C NMR}$  (75 MHz,  $\text{CDCl}_3$ , DEPT, HSQC):  $\delta$  134.4 (1C,  $\text{C}_{\text{Ph}}$ ), 132.4 (1C,  $\text{CH}=\text{CH}_2$ ), 129.0, 128.8 and 128.0 (5C,  $\text{CH}_{\text{Ph}}$ ), 118.2 (1C,  $\text{CH}=\text{CH}_2$ ), 69.2 (1C,  $\text{CNO}_2$ ), 35.2 (1C,  $\text{CH}-\text{Ph}$ ), 32.6 (1C,  $\text{CH}_2\text{CH}=\text{CH}_2$ ), 20.0 (1C,  $\text{CH}_2$ ) ppm.

**HRMS** (ESI):  $m/z$  calcd for  $\text{C}_{12}\text{H}_{14}\text{NO}_2^+$   $[\text{M}+\text{H}]^+$ : 204.1019, found 204.1027.

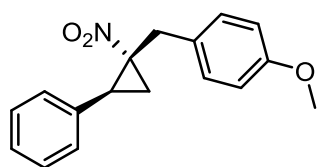

**Rel 1-methoxy-4-(((1S,2S)-1-nitro-2-phenylcyclopropyl)methyl)benzene 1h**

Cyclopropane **1h** was synthesized by **GP2** from 2-(4-methoxyphenyl)-1-nitroethane **3h** (181 mg, 1 mmol) and sulfonium bromide **4a** (359 g, 1.1 mmol), yield – 206 mg (73%). Colorless oil.  $R_f = 0.56$  (PE/EtOAc = 5:1, anisaldehyde).

$^1\text{H NMR}$  (300 MHz,  $\text{CDCl}_3$ , NOESY) 7.46 – 7.33 (m, 3H,  $\text{CH}_{\text{Ph}}$ ), 7.31 – 7.24 (m, 2H,  $\text{CH}_{\text{Ph}}$ ), 7.09 (d,  $J = 8.7$  Hz, 2H,  $\text{CH}_{\text{Ar}}$ ), 6.82 (d,  $J = 8.7$  Hz, 2H,  $\text{CH}_{\text{Ar}}$ ), 3.80 (s, 3H,  $\text{OCH}_3$ ), 3.71 (dd,  $J = 16.2, 1.8$  Hz, 1H,  $\text{CH}_{2a}\text{Ar}$ ), 3.38 (dd,  $J = 10.5, 8.4$  Hz, 1H,  $\text{CH}-\text{Ph}$ ), 2.54 (ddd,  $J = 10.5, 6.4, 1.8$  Hz, 1H,  $\text{CH}_{2a}$  anti to Ph), 2.31 (d,  $J = 16.2$  Hz, 1H,  $\text{CH}_{2b}\text{Ar}$ ), 1.79 (dd,  $J = 8.4, 6.4$  Hz, 1H,  $\text{CH}_{2b}$  syn to Ph) ppm.

**Characteristic NOESY correlations:**  $\text{CH}_2\text{Ar}/\text{CH}_{\text{Ph}}$ ;  $\text{CH}_{2b}\text{Ar}/\text{CH}_{2b}$  syn to Ph;  $\text{CH}_{\text{Ph}}/\text{CH}_{2b}$  syn to Ph.

$^{13}\text{C NMR}$  (75 MHz,  $\text{CDCl}_3$ , DEPT, HSQC):  $\delta$  158.6 (1C,  $\text{C}_{\text{Ar}}$ ), 134.5 (1C,  $\text{C}_{\text{Ph}}$ ), 129.9, 129.0, 128.95, 128.92 and 128.1 (7C,  $\text{CH}_{\text{Ar}}$  and  $\text{CH}_{\text{Ph}}$ ), 125.9 (1C,  $\text{C}_{\text{Ar}}$ ), 114.0 (2C,  $\text{CH}_{\text{Ar}}$ ), 70.7 (1C,  $\text{CNO}_2$ ), 55.3 (1C,  $\text{OCH}_3$ ), 35.8 (1C,  $\text{CH}-\text{Ph}$ ), 32.9 (1C,  $\text{CH}_2\text{Ar}$ ), 19.9 (1C,  $\text{CH}_2$ ) ppm.

**FTIR** (ATR): 3011 (br), 2928 (br), 1611 (w), 1527 (s), 1511 (s), 1451 (m), 1422 (m), 1344 (s), 1304 (m), 1244 (s), 1178 (m), 1030 (s), 876 (m), 830 (9m), 811 (m), 802 (m), 741 (m), 702 (s), 590 (m)  $\text{cm}^{-1}$ .

**HRMS** (ESI):  $m/z$  calcd for  $\text{C}_{17}\text{H}_{18}\text{NO}_3^+$   $[\text{M}+\text{H}]^+$ : 284.1281, found 284.1275

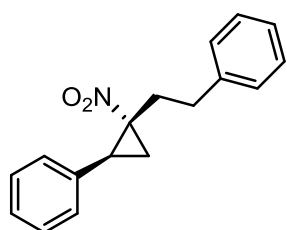

**Rel ((1S,2R)-2-nitro-2-phenethylcyclopropyl)benzene 1i**

Cyclopropane **1i** was synthesized by **GP2** from 3-phenyl-1-nitropropane **3i** (165 mg, 1 mmol) and sulfonium bromide **4a** (359 g, 1.1 mmol), yield – 191 mg (72%). Colorless oil.  $R_f = 0.78$  (PE/EtOAc = 10:1, anisaldehyde).

Mixture of diastereomers with dr = 17:1.

$^1\text{H NMR}$  (300 MHz,  $\text{CDCl}_3$ , COSY):  $\delta$  7.44 – 7.34 (m, 3H,  $\text{CH}_{\text{Ph}}$ ), 7.30 – 7.15 (m, 5H,  $\text{CH}_{\text{Ph}}$ ), 7.02 – 6.97 (m, 2H,  $\text{CH}_{\text{Ph}}$ ), 3.42 (dd,  $J = 10.4, 8.3$  Hz, 1H,  $\text{CH}-\text{Ph}$ ), 2.83 – 2.65 (m, 2H,  $\text{CH}_2\text{CH}_2\text{Ph}$ ), 2.41 – 2.29 (m, 2H,  $\text{CH}_{2a}\text{CH}_2\text{Ph}$  and  $\text{CH}_{2a}$ ), 1.71 (ddd,  $J = 15.2, 10.0, 7.2$  Hz, 1H,  $\text{CH}_{2b}\text{CH}_2\text{Ph}$ ), 1.54 (dd,  $J = 8.3, 6.2$  Hz, 1H,  $\text{CH}_{2b}$ ) ppm.

$^{13}\text{C NMR}$  (75 MHz,  $\text{CDCl}_3$ , DEPT, HSQC):  $\delta$  141.0 and 134.4 (2C,  $\text{C}_{\text{Ph}}$ ), 128.8, 128.5, 128.5, 128.0 and 126.5 (10C,  $\text{CH}_{\text{Ph}}$ ), 69.6 (1C,  $\text{CNO}_2$ ), 35.1 (1C,  $\text{CH}-\text{Ph}$ ), 32.3 (1C,  $\text{CH}_2\text{CH}_2\text{Ph}$ ), 31.2 (1C,  $\text{CH}_2\text{CH}_2\text{Ph}$ ), 20.7 (1C,  $\text{CH}_2$ ) ppm.

HRMS (ESI):  $m/z$  calcd for  $\text{C}_{17}\text{H}_{18}\text{NO}_3^+$   $[\text{M}+\text{H}]^+$ : 268.1332, found 268.1339.

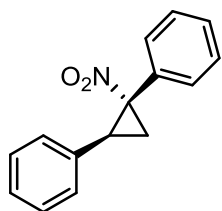

### **Rel ((1R,2S)-1-nitrocyclopropane-1,2-diyl)dibenzene 1j**

Cyclopropane **1j** was synthesized by **GP2** from phenylnitromethane **3j** (137 mg, 1 mmol) and sulfonium bromide **4a** (359 mg, 1.1 mmol). Column chromatography (PE/EtOAc, 20:1, then 5:1) afforded target cyclopropane **1j** (42 mg, 18%) as colorless oil and isoxazoline *N*-oxide **2j** (137 mg, 57%) as white solid.

Mixture of diastereomers with dr = 14:1.

$R_f = 0.75$  (PE/EtOAc = 5:1, anisaldehyde).

$^1\text{H NMR}$  (300 MHz,  $\text{CDCl}_3$ ):  $\delta$  7.34 – 7.14 (m, 8H,  $\text{CH}_{\text{Ph}}$ ), 6.93 – 6.78 (m, 2H,  $\text{CH}_{\text{Ph}}$ ), 3.70 (dd,  $J = 10.7, 8.4$  Hz, 1H,  $\text{CH}-\text{Ph}$ ), 2.78 (dd,  $J = 10.7, 6.3$  Hz, 1H,  $\text{CH}_{2a}$ ), 2.18 (dd,  $J = 8.4, 6.3$  Hz, 1H,  $\text{CH}_{2b}$ ) ppm. Characteristic signals of minor diastereomer: 3.19 (t,  $J = 9.1$  Hz, 1H,  $\text{CH}-\text{Ph}$ ), 2.98 (dd,  $J = 8.6, 6.5$  Hz, 1H,  $\text{CH}_{2a}$ ), 1.94 (dd,  $J = 9.7, 6.5$  Hz, 1H,  $\text{CH}_{2b}$ ) ppm.

$^{13}\text{C NMR}$  (75 MHz,  $\text{CDCl}_3$ , DEPT):  $\delta$  134.4 and 129.8 (2C,  $\text{C}_{\text{Ph}}$ ), 132.5, 129.5, 128.4, 128.3, 128.1 and 127.5 (10C,  $\text{CH}_{\text{Ph}}$ ), 73.7 (1C,  $\text{CNO}_2$ ), 35.2 (1C,  $\text{CH}-\text{Ph}$ ), 21.7 (1C,  $\text{CH}_2$ ) ppm.

HRMS (ESI):  $m/z$  calcd for  $\text{C}_{15}\text{H}_{14}\text{NO}_2^+$   $[\text{M}+\text{H}]^+$ : 240.1019, found 240.1022.

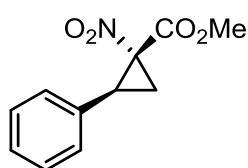

**1k**, *Rel* (1R,2S)

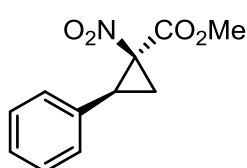

**1k'**, *Rel* (1S,2S)

### **Rel methyl (1R,2S)-1-nitro-2-phenylcyclopropane-1-carboxylate 1k and Rel methyl (1S,2S)-1-nitro-2-phenylcyclopropane-1-carboxylate 1k'**

Cyclopropanes **1k** and **1k'** were synthesized by **GP2** from methyl nitroacetate **3k** (119 mg, 1 mmol) and sulfonium bromide **4a** (359 g, 1.1 mmol). Column chromatography (PE/EtOAc, 30:1, then 1:1) afforded **1k** (68 mg, 31%), **1k'** (56 mg, 25%), and isoxazoline *N*-oxide **2k** (77 mg, 35%) as colorless oils.

### **Rel methyl (1R,2S)-1-nitro-2-phenylcyclopropane-1-carboxylate 1k**

$R_f = 0.51$  (PE/EtOAc = 10:1, anisaldehyde).

$^1\text{H NMR}$  (300 MHz,  $\text{CDCl}_3$ ):  $\delta$  7.36 – 7.27 (m, 3H,  $\text{CH}_{\text{Ph}}$ ), 7.23 – 7.17 (m, 2H,  $\text{CH}_{\text{Ph}}$ ), 3.77 (dd,  $J = 10.7, 9.2$  Hz, 1H,  $\text{CH}-\text{Ph}$ ), 3.50 (s, 3H,  $\text{OCH}_3$ ), 2.45 (dd,  $J = 9.2, 6.6$  Hz, 1H,  $\text{CH}_{2a}$ ), 2.22 (dd,  $J = 10.7, 6.6$  Hz, 1H,  $\text{CH}_{2b}$ ) ppm.

$^{13}\text{C NMR}$  (75 MHz,  $\text{CDCl}_3$ , DEPT):  $\delta$  162.5 (1C,  $\text{C}=\text{O}$ ), 132.1 (1C,  $\text{C}_{\text{Ph}}$ ), 128.6 and 128.4 (4C,  $\text{CH}_{\text{Ph}}$ ), 128.4 (1C,  $\text{CH}_{\text{Ph}}$ ), 71.8 (1C,  $\text{CNO}_2$ ), 53.2 (1C,  $\text{OCH}_3$ ), 34.3 (1C,  $\text{CH}-\text{Ph}$ ), 21.0 (1C,  $\text{CH}_2$ ) ppm.



### **Rel methyl (1*S*,2*S*)-1-nitro-2-phenylcyclopropane-1-carboxylate 1k`**

$R_f$  = 0.32 (PE/EtOAc = 10:1, anisaldehyde).

$^1\text{H NMR}$  (300 MHz,  $\text{CDCl}_3$ ):  $\delta$  7.35 – 7.18 (m, 5H,  $\text{CH}_{\text{Ph}}$ ), 3.89 (s, 3H,  $\text{OCH}_3$ ), 3.49 (t,  $J$  = 9.6 Hz, 1H,  $\text{CH}-\text{Ph}$ ), 2.69 (dd,  $J$  = 9.2, 7.0 Hz, 1H,  $\text{CH}_{2a}$ ), 2.04 (dd,  $J$  = 9.9, 7.0 Hz, 1H,  $\text{CH}_{2b}$ ) ppm.

$^{13}\text{C NMR}$  (75 MHz,  $\text{CDCl}_3$ , DEPT):  $\delta$  165.9 (1C,  $\text{C}=\text{O}$ ), 131.4 (1C,  $\text{C}_{\text{Ph}}$ ), 128.8, 128.7 and 128.4 (5C,  $\text{CH}_{\text{Ph}}$ ), 72.58 (1C,  $\text{CNO}_2$ ), 53.8 (1C,  $\text{OCH}_3$ ), 33.9 (1C,  $\text{CH}-\text{Ph}$ ), 20.1 (1C,  $\text{CH}_2$ ) ppm.

NMR spectra were in accordance with literature data.<sup>16</sup>

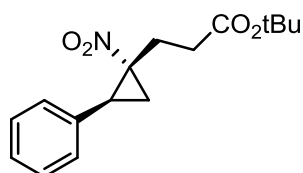

### **Rel tert-butyl 3-((1*R*,2*S*)-1-nitro-2-phenylcyclopropyl)propanoate 1l**

Cyclopropane **1l** was synthesized by **GP2** from *tert*-butyl 4-nitrobutanoate **3l** (378 mg, 3 mmol) and sulfonium bromide **4a** (717 g, 3.3 mmol), yield – 432 mg (74%). Colorless oil.  $R_f$  = 0.56 (PE/EtOAc = 20:1,

anisaldehyde).

$^1\text{H NMR}$  (300 MHz,  $\text{CDCl}_3$ ):  $\delta$  7.40 – 7.28 (m, 3H,  $\text{CH}_{\text{Ph}}$ ), 7.23 – 7.18 (m, 2H,  $\text{CH}_{\text{Ph}}$ ), 3.33 (dd,  $J$  = 10.5, 8.4 Hz, 1H,  $\text{CH}-\text{Ph}$ ), 2.42 – 2.31 (m, 4H,  $\text{CH}_{2a}$  and  $\text{CH}_2\text{CH}_2\text{CO}_2\text{tBu}$  and  $\text{CH}_{2a}\text{CH}_2\text{CO}_2\text{tBu}$ ), 1.69 (dd,  $J$  = 8.4, 6.1 Hz, 1H,  $\text{CH}_{2b}$ ), 1.65 – 1.54 (m, 1H,  $\text{CH}_{2b}\text{CH}_2\text{CO}_2\text{tBu}$ ), 1.39 (s, 9H,  $\text{tBu}$ ) ppm.

$^{13}\text{C NMR}$  (75 MHz,  $\text{CDCl}_3$ , DEPT, HSQC):  $\delta$  171.8 (1C,  $\text{C}=\text{O}$ ), 134.1 (1C,  $\text{C}_{\text{Ph}}$ ), 128.88, 128.85 and 128.1 (5C,  $\text{CH}_{\text{Ph}}$ ), 80.8 (1C,  $\text{CMe}_3$ ), 69.4 (1C,  $\text{CNO}_2$ ), 35.8 (1C,  $\text{CH}-\text{Ph}$ ), 31.9 (1C,  $\text{CH}_2\text{CH}_2\text{CO}_2\text{tBu}$ ), 28.1 (3C,  $\text{CMe}_3$ ), 24.0 (1C,  $\text{CH}_2\text{CH}_2\text{CO}_2\text{tBu}$ ), 20.4 (1C,  $\text{CH}_2$ ) ppm.

**FTIR** (ATR): 2976 (br), 1730 (s), 1529 (9s), 1428 (m), 1347 (s), 1331 (s), 1281 (m), 1148 (s), 1136 (s), 950 (m), 880 (m), 789 (m), 758 (m), 698 (s), 575 (m)  $\text{cm}^{-1}$ .

**HRMS** (ESI):  $m/z$  calcd for  $\text{C}_{16}\text{H}_{22}\text{NO}_4^+$  [ $\text{M}+\text{H}$ ] $^+$ : 292.1543, found 292.1534.

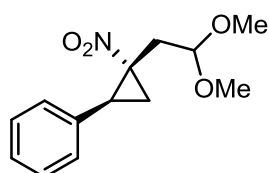

### **Rel ((1*S*,2*S*)-2-(2,2-dimethoxyethyl)-2-nitrocyclopropyl)benzene 1m**

Cyclopropane **1m** was synthesized by **GP2** from 3-nitropropanal dimethylacetal **3m** (149 mg, 1 mmol) and sulfonium bromide **4a** (359 mg, 1.1 mmol), yield – 181 mg (72%). Colorless oil.  $R_f$  = 0.74 (PE/EtOAc = 5:1,

anisaldehyde).

$^1\text{H NMR}$  (300 MHz,  $\text{CDCl}_3$ , COSY, NOESY):  $\delta$  7.39 – 7.30 (m, 3H,  $\text{CH}_{\text{Ph}}$ ), 7.22 – 7.16 (m, 2H,  $\text{CH}_{\text{Ph}}$ ), 4.61 (dd,  $J$  = 7.7, 3.1 Hz, 1H,  $\text{CH}_2\text{CH}(\text{OMe})_2$ ), 3.34 and 3.32 (2s, 6H, 2  $\text{OCH}_3$ ), 3.25 (dd,  $J$  = 10.5, 8.6 Hz, 1H,  $\text{CH}-\text{Ph}$ ), 2.70 (ddd,  $J$  = 15.6, 3.1, 1.9 Hz, 1H,  $\text{CH}_{2a}\text{CH}(\text{OMe})_2$ ), 2.45 (ddd,  $J$  = 10.5, 6.4, 1.9 Hz, 1H,  $\text{CH}_{2a}$ ), 1.91 (dd,  $J$  = 8.6, 6.4 Hz, 1H,  $\text{CH}_{2b}$ ), 1.23 (dd,  $J$  = 15.6, 7.7 Hz, 1H,  $\text{CH}_{2b}\text{CH}(\text{OMe})_2$ ) ppm. **Characteristic NOESY correlations:**  $\text{CH}_2\text{CH}(\text{OMe})_2/\text{CH}_{\text{Ph}}$ ;  $\text{CH}_{2b}/\text{CH}_{\text{Ph}}$ .

$^{13}\text{C NMR}$  (75 MHz,  $\text{CDCl}_3$ , DEPT, HSQC):  $\delta$  134.3 (1C,  $\text{C}_{\text{Ph}}$ ), 128.9, 128.8 and 128.0 (5C,  $\text{CH}_{\text{Ph}}$ ), 103.4 (1C,  $\text{CH}_2\text{CH}(\text{OMe})_2$ ), 67.1 (1C,  $\text{CNO}_2$ ), 54.9 and 54.0 (2C,  $\text{OCH}_3$ ), 34.9 (1C,  $\text{CH}-\text{Ph}$ ), 32.1 (1C,  $\text{CH}_2\text{CH}(\text{OMe})_2$ ), 19.9 (1C,  $\text{CH}_2$ ) ppm.

**HRMS** (ESI):  $m/z$  calcd for  $\text{C}_{13}\text{H}_{17}\text{NaNO}_4^+$  [ $\text{M}+\text{Na}$ ] $^+$ : 274.1050, found 274.1044.

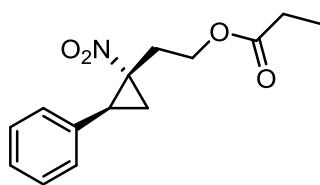

**Rel 2-((1S,2S)-1-nitro-2-phenylcyclopropyl)ethyl propionate 1n**

Cyclopropane **1n** was synthesized by **GP2** from 3-nitropropyl propionate **3n** (175 mg, 1 mmol) and sulfonium bromide **4a** (359 mg, 1.1 mmol), yield – 168 mg (64%). Colorless oil.  $R_f = 0.40$  (PE/EtOAc = 5:1, anisaldehyde).

$^1\text{H NMR}$  (300 MHz,  $\text{CDCl}_3$ , COSY, NOESY):  $\delta$  7.42 – 7.31 (m, 3H,  $\text{CH}_{\text{Ph}}$ ), 7.23 – 7.17 (m, 2H,  $\text{CH}_{\text{Ph}}$ ), 4.28 (dt,  $J = 11.1, 6.8$  Hz, 1H,  $\text{CH}_2\text{CH}_{2\text{a}}\text{O}$ ), 4.16 (ddd,  $J = 11.1, 7.1, 5.6$  Hz, 1H,  $\text{CH}_2\text{CH}_{2\text{b}}\text{O}$ ), 3.33 (dd,  $J = 10.5, 8.5$  Hz, 1H,  $\text{CH}-\text{Ph}$ ), 2.65 (dddd,  $J = 15.6, 6.5, 5.6, 1.8$  Hz, 1H,  $\text{CH}_{2\text{a}}\text{CH}_2\text{O}$ ), 2.45 (ddd,  $J = 10.6, 6.3, 1.8$  Hz, 1H,  $\text{CH}_{2\text{a}}$  anti to Ph), 2.28 (q,  $J = 7.6$  Hz, 2H,  $\text{CH}_3\text{CH}_2$ ), 1.72 (dd,  $J = 8.4, 6.3$  Hz, 1H,  $\text{CH}_{2\text{b}}$  syn to Ph), 1.44 (dt,  $J = 15.6, 7.1$  Hz, 1H,  $\text{CH}_{2\text{b}}\text{CH}_2\text{O}$ ), 1.12 (t,  $J = 7.6$  Hz, 3H,  $\text{CH}_3\text{CH}_2$ ) ppm. **Characteristic NOESY correlations:**  $\text{CH}_2\text{CH}_2\text{O}/\text{CH}_{\text{Ph}}$ ;  $\text{CH}_{\text{Ph}}/\text{CH}_{2\text{b}}$  syn to Ph;  $\text{CH}_{2\text{b}}\text{CH}_2\text{O}/\text{CH}_{2\text{b}}$  syn to Ph.

$^{13}\text{C NMR}$  (75 MHz,  $\text{CDCl}_3$ , DEPT, HSQC):  $\delta$  174.2 (1C, C=O), 134.1 (1C,  $\text{C}_{\text{Ph}}$ ), 129.0, 128.9 and 128.2 (5C,  $\text{CH}_{\text{Ph}}$ ), 67.5 (1C,  $\text{CNO}_2$ ), 61.2 (1C,  $\text{CH}_2\text{CH}_2\text{O}$ ), 35.1 (1C,  $\text{CH}-\text{Ph}$ ), 27.9 (1C,  $\text{CH}_2\text{CH}_2\text{O}$ ), 27.5 (1C,  $\text{CH}_3\text{CH}_2$ ), 20.0 (1C,  $\text{CH}_2$ ), 9.1 (1C,  $\text{CH}_3\text{CH}_2$ ) ppm.

**HRMS** (ESI):  $m/z$  calcd for  $\text{C}_{14}\text{H}_{18}\text{NO}_4^+$  [ $\text{M}+\text{H}$ ] $^+$ : 264.1230, found 264.1238.

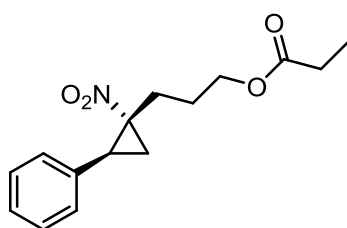

**Rel 3-((1R,2S)-1-nitro-2-phenylcyclopropyl)propyl propionate 1o**

Cyclopropane **1o** was synthesized by **GP2** from 4-nitrobutyl propionate **3o** (175 mg, 1 mmol) and sulfonium bromide **4a** (359 mg, 1.1 mmol), yield – 140 mg (51%). Colorless oil.  $R_f = 0.56$  (PE/EtOAc = 5:1, anisaldehyde).

$^1\text{H NMR}$  (300 MHz,  $\text{CDCl}_3$ , COSY, NOESY):  $\delta$  7.41 – 7.30 (m, 3H,  $\text{CH}_{\text{Ph}}$ ), 7.22 – 7.16 (m, 2H,  $\text{CH}_{\text{Ph}}$ ), 4.04 – 3.88 (m, 2H,  $\text{CH}_2\text{CH}_2\text{CH}_2\text{O}$ ), 3.38 (dd,  $J = 10.4, 8.3$  Hz, 1H,  $\text{CH}-\text{Ph}$ ), 2.37 (ddd,  $J = 10.4, 6.1, 1.5$  Hz, 1H,  $\text{CH}_{2\text{a}}$  anti to Ph), 2.24 (q,  $J = 7.5$  Hz, 2H,  $\text{CH}_3\text{CH}_2$ ), 2.19 – 2.09 (m, 1H,  $\text{CH}_{2\text{a}}\text{CH}_2\text{CH}_2\text{O}$ ), 1.83 – 1.70 (m, 2H,  $\text{CH}_2\text{CH}_2\text{CH}_2\text{O}$ ), 1.61 (dd,  $J = 8.3, 6.1$  Hz, 1H,  $\text{CH}_{2\text{b}}$  syn to Ph), 1.44 – 1.29 (m, 1H,  $\text{CH}_{2\text{b}}\text{CH}_2\text{CH}_2\text{O}$ ), 1.08 (t,  $J = 7.6$  Hz, 3H,  $\text{CH}_3\text{CH}_2$ ) ppm. **Characteristic NOESY correlations:**  $\text{CH}_2\text{CH}_2\text{CH}_2\text{O}/\text{CH}_{\text{Ph}}$ ;  $\text{CH}_{\text{Ph}}/\text{CH}_{2\text{b}}$  syn to Ph;  $\text{CH}_2\text{CH}_2\text{CH}_2\text{O}/\text{CH}_{2\text{b}}$  syn to Ph

$^{13}\text{C NMR}$  (75 MHz,  $\text{CDCl}_3$ , DEPT, HSQC):  $\delta$  174.3 (1C, C=O), 134.3 (1C,  $\text{C}_{\text{Ph}}$ ), 128.8 and 128.0 (5C,  $\text{CH}_{\text{Ph}}$ ), 69.6 (1C,  $\text{CNO}_2$ ), 63.4 (1C,  $\text{CH}_2\text{CH}_2\text{CH}_2\text{O}$ ), 35.4 (1C,  $\text{CH}-\text{Ph}$ ), 27.6 (1C,  $\text{CH}_3\text{CH}_2$ ), 25.5 (1C,  $\text{CH}_2\text{CH}_2\text{CH}_2\text{O}$ ), 25.2 (1C,  $\text{CH}_2\text{CH}_2\text{CH}_2\text{O}$ ), 20.5 (1C,  $\text{CH}_2$ ), 9.2 (1C,  $\text{CH}_3\text{CH}_2$ ) ppm.

**HRMS** (ESI):  $m/z$  calcd for  $\text{C}_{15}\text{H}_{20}\text{NO}_4^+$  [ $\text{M}+\text{H}$ ] $^+$ : 278.1387, found 278.1385.

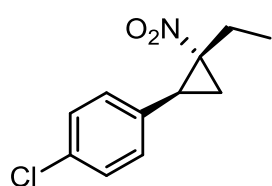

**Rel 1-chloro-4-((1S,2R)-2-ethyl-2-nitrocyclopropyl)benzene 1p**

Cyclopropane **1p** was synthesized by **GP2** from 1-nitropropane **3d** (45 mg, 0.5 mmol) and sulfonium bromide **4b** (198 g, 0.55 mmol). Column chromatography (PE/EtOAc, 100:1, then 1:1) afforded target cyclopropane **1p** (25 mg, 22%) and isoxazoline *N*-oxide **2p** (64 mg, 57%) as colorless oils.

Mixture of diastereomers with  $dr = 4:1$ .

$R_f = 0.55$  (major) and 0.32 (minor) (PE/EtOAc = 20:1, anisaldehyde).

**<sup>1</sup>H NMR** (300 MHz, CDCl<sub>3</sub>, COSY): δ 7.34 (d, *J* = 8.4 Hz, 2H, CH<sub>Ar</sub>), 7.15 (d, *J* = 8.4 Hz, 2H, CH<sub>Ar</sub>), 3.33 (dd, *J* = 10.4, 8.2 Hz, 1H, CH–Ar), 2.35 (ddd, *J* = 10.4, 6.2, 1.7 Hz, 1H, CH<sub>2a</sub> anti to Ar), 2.14 (dq, *J* = 15.7, 7.1, 1.7 Hz, 1H, CH<sub>2a</sub>CH<sub>3</sub>), 1.51 (dd, *J* = 8.1, 6.1 Hz, 1H, CH<sub>2b</sub> syn to Ar), 1.29 (dq, *J* = 15.7, 7.3 Hz, 1H, CH<sub>2b</sub>CH<sub>3</sub>), 0.98 (t, *J* = 7.2 Hz, 3H, CH<sub>2</sub>CH<sub>3</sub>) ppm. Characteristic signals of minor diastereomer: 7.28 (d, *J* = 8.5 Hz, 2H, CH<sub>Ar</sub>), 2.79 – 2.65 (m, 1H, CH<sub>2a</sub>CH<sub>3</sub>), 2.68 – 2.60 (m, 1H, CH–Ar), 2.53 (ddd, *J* = 8.1, 6.4, 1.5 Hz, 1H, CH<sub>2</sub>), 1.79 (dq, *J* = 14.7, 7.3 Hz, 1H, CH<sub>2b</sub>CH<sub>3</sub>), 1.17 (t, *J* = 7.3 Hz, 3H, CH<sub>2</sub>CH<sub>3</sub>).

**<sup>13</sup>C NMR** (75 MHz, CDCl<sub>3</sub>, DEPT, HSQC): δ 133.9 and 133.3 (2C, C<sub>Ar</sub>), 130.2 and 129.0 (4C, CH<sub>Ar</sub>), 70.9 (1C, CNO<sub>2</sub>), 34.7 (1C, CH–Ar), 22.3 (1C, CH<sub>2</sub>CH<sub>3</sub>), 20.2 (1C, CH<sub>2</sub>), 10.2 (1C, CH<sub>2</sub>CH<sub>3</sub>) ppm. Characteristic signals of minor diastereomer: 130.3 and 128.7 (4C, CH<sub>Ar</sub>), 33.4 (1C, CH–Ar), 28.2 (1C, CH<sub>2</sub>CH<sub>3</sub>), 18.4 (1C, CH<sub>2</sub>), 10.5 (1C, CH<sub>2</sub>CH<sub>3</sub>) ppm.

**HRMS** (ESI): *m/z* calcd for C<sub>11</sub>H<sub>13</sub><sup>35</sup>ClNO<sub>2</sub><sup>+</sup> [M+H]<sup>+</sup>: 226.0629, found 226.0635.

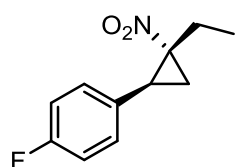

**Rel 1-((1*S*,2*R*)-2-ethyl-2-nitrocyclopropyl)-4-fluorobenzene **1q****

Cyclopropane **1q** was synthesized by **GP2** from 1-nitropropane **3d** (45 mg, 0.5 mmol) and sulfonium bromide **4c** (189 mg, 0.55 mmol), yield – 74 mg (71%).

Colorless oil. *R<sub>f</sub>* = 0.74 (PE/EtOAc = 20:1, anisaldehyde). Mixture of diastereomers with *dr* = 14:1.

**<sup>1</sup>H NMR** (300 MHz, CDCl<sub>3</sub>): δ 7.19 (dd, *J* = 8.6, 5.2 Hz, 2H, CH<sub>Ar</sub>), 7.05 (t, *J* = 8.6 Hz, 2H, CH<sub>Ar</sub>), 3.41 – 3.27 (m, 1H, CH–Ar), 2.34 (ddd, *J* = 10.5, 6.1, 1.7 Hz, 1H, CH<sub>2a</sub> anti to Ar), 2.15 (dq, *J* = 14.5, 7.2, 1.7 Hz, 1H, CH<sub>3</sub>CH<sub>2a</sub>), 1.50 (dd, *J* = 8.2, 6.1 Hz, 1H, CH<sub>2b</sub> syn to Ar), 1.27 (dq, *J* = 14.5, 7.2 Hz, 1H, CH<sub>3</sub>CH<sub>2b</sub>), 0.98 (t, *J* = 7.2 Hz, 3H, CH<sub>3</sub>CH<sub>2</sub>) ppm. Characteristic signals of minor diastereomer: 2.79 – 2.60 (m, 2H, CH<sub>2a</sub>CH<sub>3</sub> and CH–Ar), 2.52 (ddd, *J* = 8.2, 6.5, 1.5 Hz, 1H, CH<sub>2a</sub>), 1.78 (dq, *J* = 14.7, 7.3 Hz, 1H, CH<sub>2b</sub>CH<sub>3</sub>), 1.17 (t, *J* = 7.3 Hz, 3H, CH<sub>2</sub>CH<sub>3</sub>) ppm.

**<sup>13</sup>C NMR** (75 MHz, CDCl<sub>3</sub>, DEPT, HMBC): δ 162.4 (d, *J* = 247.0 Hz, 1C, C<sub>Ar</sub>), 130.5 (d, *J* = 8.2 Hz, 2C, CH<sub>Ar</sub>), 115.7 (d, *J* = 21.6 Hz, 2C, CH<sub>Ar</sub>), 100.1 (1C, C<sub>Ar</sub>), 70.8 (1C, CNO<sub>2</sub>), 34.7 (1C, CH–Ar), 22.2 (1C, CH<sub>3</sub>CH<sub>2</sub>), 20.3 (1C, CH<sub>2</sub>), 10.2 (1C, CH<sub>3</sub>CH<sub>2</sub>) ppm.

**<sup>19</sup>F NMR** (282 MHz, CDCl<sub>3</sub>): δ -114.07 (tt, *J* = 8.6, 5.2 Hz) ppm.

**HRMS** (ESI): *m/z* calcd for C<sub>11</sub>H<sub>13</sub>FNO<sub>2</sub><sup>+</sup> [M+H]<sup>+</sup>: 210.0925, found 210.0929.

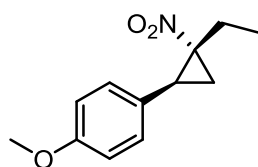

**Rel 1-((1*S*,2*R*)-2-ethyl-2-nitrocyclopropyl)-4-methoxybenzene **1r****

Cyclopropane **1r** was synthesized by **GP2** from 1-nitropropane **3d** (45 mg, 0.5 mmol) and sulfonium bromide **4d** (196 mg, 0.55 mmol), yield – 70 mg (64%). Colorless oil. *R<sub>f</sub>* = 0.42 (PE/EtOAc = 20:1, anisaldehyde).

**<sup>1</sup>H NMR** (300 MHz, CDCl<sub>3</sub>, COSY): δ 7.12 (d, *J* = 8.4 Hz, 2H, CH<sub>Ar</sub>), 6.88 (d, *J* = 8.7 Hz, 2H, CH<sub>Ar</sub>), 3.82 (s, 3H, OCH<sub>3</sub>), 3.31 (dd, *J* = 10.4, 8.2 Hz, 1H, CH–Ar), 2.32 (ddd, *J* = 10.3, 6.0, 1.7 Hz, 1H, CH<sub>2a</sub> anti to Ar), 2.15 (dq, *J* = 15.8, 7.0, 1.7 Hz, 1H, CH<sub>3</sub>CH<sub>2a</sub>), 1.49 (dd, *J* = 8.2, 6.0 Hz, 1H, CH<sub>2b</sub> syn to Ar), 1.29 (dq, *J* = 15.1, 7.3 Hz, 1H, CH<sub>3</sub>CH<sub>2b</sub>), 0.98 (t, *J* = 7.2 Hz, 3H, CH<sub>3</sub>CH<sub>2</sub>) ppm.

**<sup>13</sup>C NMR** (75 MHz, CDCl<sub>3</sub>, DEPT, HSQC): δ 159.3 (1C, C–OCH<sub>3</sub>), 130.0 (2C, CH<sub>Ar</sub>), 126.7 (1C, C<sub>Ar</sub>), 114.1 (2C, CH<sub>Ar</sub>), 71.0 (1C, CNO<sub>2</sub>), 55.4 (1C, OCH<sub>3</sub>), 35.3 (1C, CH–Ar), 22.2 (1C, CH<sub>3</sub>CH<sub>2</sub>), 20.4 (1C, CH<sub>2</sub>), 10.2 (1C, CH<sub>3</sub>CH<sub>2</sub>) ppm.

**HRMS (ESI):**  $m/z$  calcd for  $C_{12}H_{16}NO_3^+$   $[M+H]^+$ : 222.1125, found 222.1121.

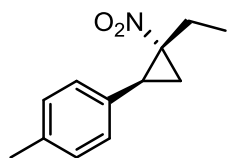

**Rel 1-((1S,2R)-2-ethyl-2-nitrocyclopropyl)-4-methylbenzene 1s**

Cyclopropane **1s** was synthesized by **GP2** from 1-nitropropane **3d** (45 mg, 0.5 mmol) and sulfonium bromide **4e** (187 mg, 0.55 mmol), yield – 83 mg (81%).

Colorless oil.  $R_f$  = 0.74 (PE/EtOAc = 20:1, anisaldehyde). Mixture of diastereomers with dr = 17:1.

**$^1H$  NMR** (300 MHz,  $CDCl_3$ , COSY, NOESY):  $\delta$  7.17 (d,  $J$  = 8.0 Hz, 2H,  $CH_{Ar}$ ), 7.10 (d,  $J$  = 8.0 Hz, 2H,  $CH_{Ar}$ ), 3.34 (dd,  $J$  = 10.4, 8.3 Hz, 1H,  $CH-Ar$ ), 2.41 – 2.29 (m, 4H,  $CH_3-Ar$  and  $CH_{2a}$ ), 2.15 (dtd,  $J$  = 15.6, 7.1, 1.7 Hz, 1H,  $CH_3CH_{2a}$ ), 1.53 (dd,  $J$  = 8.3, 6.0 Hz, 1H,  $CH_{2b}$ ), 1.37 – 1.23 (m, 1H,  $CH_3CH_{2b}$ ), 0.99 (t,  $J$  = 7.1 Hz, 3H,  $CH_3CH_2$ ) ppm. **Characteristic NOESY correlations:**  $CH_{2a}CH_3/CH_{Ar}$ ;  $CH_3CH_{2b}/CH_{Ar}$ ;  $CH_{2b}/CH_{Ar}$ ;  $CH_{2b}/CH_3CH_{2b}$ .

**$^{13}C$  NMR** (75 MHz,  $CDCl_3$ , DEPT, HSQC):  $\delta$  137.6 and 131.7 (2C,  $C_{Ar}$ ), 129.4 and 128.8 (4C,  $CH_{Ar}$ ), 71.0 (1C,  $CNO_2$ ), 35.5 (1C,  $CH-Ar$ ), 22.2 (1C,  $CH_3CH_2$ ), 21.2 (1C,  $CH_{3Ar}$ ), 20.2 (1C,  $CH_2$ ), 10.2 (1C,  $CH_3CH_2$ ) ppm.

**HRMS (ESI):**  $m/z$  calcd for  $C_{12}H_{15}NaNO_2^+$   $[M+Na]^+$ : 228.0995, found 228.0997.

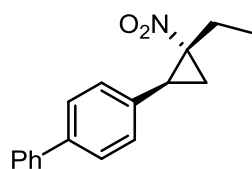

**Rel 4-((1S,2R)-2-ethyl-2-nitrocyclopropyl)-1,1'-biphenyl 1t**

Cyclopropane **1t** was synthesized by **GP2** from 1-nitropropane **3d** (45 mg, 0.5 mmol) and sulfonium bromide **4f** (221 mg, 0.55 mmol), yield – 51 mg (38%). Colorless oil.  $R_f$  = 0.39 (major) and 0.24 (minor) (PE/EtOAc = 100:1, anisaldehyde). Mixture of diastereomers with dr = 6:1.

Mixture of diastereomers with dr = 6:1.

**$^1H$  NMR** (300 MHz,  $CDCl_3$ , COSY):  $\delta$  7.62 – 7.30 (m, 9H,  $CH_{Ar}$ ), 3.43 (dd,  $J$  = 10.4, 8.3 Hz, 1H,  $CH-Ar$ ), 2.40 (ddd,  $J$  = 10.4, 6.1, 1.7 Hz, 1H,  $CH_{2a}$ ), 2.32 – 2.15 (m, 1H,  $CH_{2a}CH_3$ ), 1.61 (dd,  $J$  = 8.3, 6.1 Hz, 1H,  $CH_{2b}$ ), 1.46 – 1.30 (m, 1H,  $CH_{2b}CH_3$ ), 1.03 (t,  $J$  = 7.2 Hz, 3H,  $CH_2CH_3$ ) ppm. Characteristic signals of minor diastereomer: 2.85 – 2.70 (m, 2H,  $CH_{2a}CH_3$  and  $CH-Ar$ ), 2.63 (ddd,  $J$  = 8.2, 6.4, 1.5 Hz, 1H,  $CH_{2a}$ ), 1.83 (dq,  $J$  = 14.8, 7.3 Hz, 1H,  $CH_{2b}CH_3$ ), 1.55 (dd,  $J$  = 9.3, 6.4 Hz, 1H,  $CH_{2b}$ ), 1.22 (t,  $J$  = 7.3 Hz, 3H,  $CH_2CH_3$ ) ppm.

**$^{13}C$  NMR** (75 MHz,  $CDCl_3$ , DEPT, HSQC):  $\delta$  140.8, 140.4 and 133.8 (3C,  $C_{Ar}$ ), 129.3, 129.0, 127.6, 127.4 and 127.1 (9C,  $CH_{Ar}$ ), 71.1 (1C,  $CNO_2$ ), 35.3 (1C,  $CH-Ar$ ), 22.3 (1C,  $CH_3CH_2$ ), 20.3 (1C,  $CH_2$ ), 10.3 (1C,  $CH_3CH_2$ ) ppm. Characteristic signals of minor diastereomer: 128.8 and 127.2 ( $CH_{Ar}$ ), 33.9 (1C,  $CH-Ar$ ), 28.3 (1C,  $CH_3CH_2$ ), 18.4 (1C,  $CH_2$ ), 10.5 (1C,  $CH_3CH_2$ ) ppm.

**HRMS (ESI):**  $m/z$  calcd for  $C_{17}H_{18}NO_2^+$   $[M+H]^+$ : 268.1332, found 268.1332.

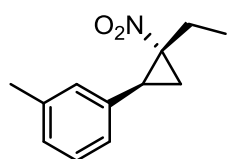

**Rel 1-((1S,2R)-2-ethyl-2-nitrocyclopropyl)-3-methylbenzene 1u**

Cyclopropane **1u** was synthesized by **GP2** from 1-nitropropane **3d** (45 mg, 1 mmol) and sulfonium bromide **4g** (187 g, 1.1 mmol). Column chromatography (PE/EtOAc, 100:1, then 3:1) afforded target cyclopropane **1u** (20 mg, 20%) and isoxazoline *N*-oxide **2u** (49 mg, 48%) as colorless oils.

Colorless oils.

$R_f$  = 0.76 (PE/EtOAc = 20:1, anisaldehyde).

Mixture of diastereomers with dr = 6:1.

**<sup>1</sup>H NMR** (300 MHz, CDCl<sub>3</sub>, COSY): δ 7.26 – 6.95 (m, 4H, CH<sub>Ar</sub>), 3.32 (dd, *J* = 10.4, 8.3 Hz, 1H, CH-Ar), 2.35 (s, 3H, Me<sub>Ar</sub>), 2.34 – 2.27 (m, 1H, CH<sub>2a</sub>), 2.16 (dq, *J* = 15.7, 7.1, 1.8 Hz, 1H, CH<sub>2a</sub>CH<sub>3</sub>), 1.52 (dd, *J* = 8.3, 6.0 Hz, 1H, CH<sub>2b</sub>), 1.32 – 1.19 (m, 1H, CH<sub>2b</sub>CH<sub>3</sub>), 0.97 (t, *J* = 7.2 Hz, 3H, CH<sub>2</sub>CH<sub>3</sub>) ppm. Characteristic signals of minor diastereomer: δ 2.78 – 2.69 (m, 1H, CH<sub>2</sub>CH<sub>3</sub>), 2.68 – 2.60 (m, 1H, CH-Ar), 2.53 (ddd, *J* = 8.2, 6.3, 1.5 Hz, 1H, CH<sub>2</sub>), 2.32 (s, 3H, Me<sub>Ar</sub>), 1.77 (dq, *J* = 14.8, 7.3 Hz, 1H, CH<sub>2</sub>CH<sub>3</sub>), 1.46 (dd, *J* = 9.2, 6.3 Hz, 1H, CH<sub>2</sub>), 1.16 (t, *J* = 7.3 Hz, 3H, CH<sub>2</sub>CH<sub>3</sub>) ppm.

**<sup>13</sup>C NMR** (75 MHz, CDCl<sub>3</sub>, DEPT, HSQC): δ 138.4 and 134.7 (2C, C<sub>Ar</sub>), 129.7, 128.6, 128.6 and 125.9 (4C, CH<sub>Ar</sub>), 71.0 (1C, CNO<sub>2</sub>), 35.7 (1C, CH-Ar), 22.2 (1C, CH<sub>2</sub>CH<sub>3</sub>), 21.5 (1C, Me<sub>Ar</sub>), 20.1 (1C, CH<sub>2</sub>), 10.3 (1C, CH<sub>2</sub>CH<sub>3</sub>) ppm. Characteristic signals of minor diastereomer: δ 129.7 and 128.3 (2C, CH<sub>Ar</sub>), 34.2 (1C, CH-Ar), 28.4 (1C, CH<sub>2</sub>CH<sub>3</sub>), 18.3 (1C, CH<sub>2</sub>), 10.5 (1C, CH<sub>2</sub>CH<sub>3</sub>).

**HRMS** (ESI): *m/z* calcd for C<sub>12</sub>H<sub>16</sub>NO<sub>2</sub><sup>+</sup> [M+H]<sup>+</sup>: 206.1176, found 206.1182.

## 6. Synthesis of isoxazoline *N*-oxides 2

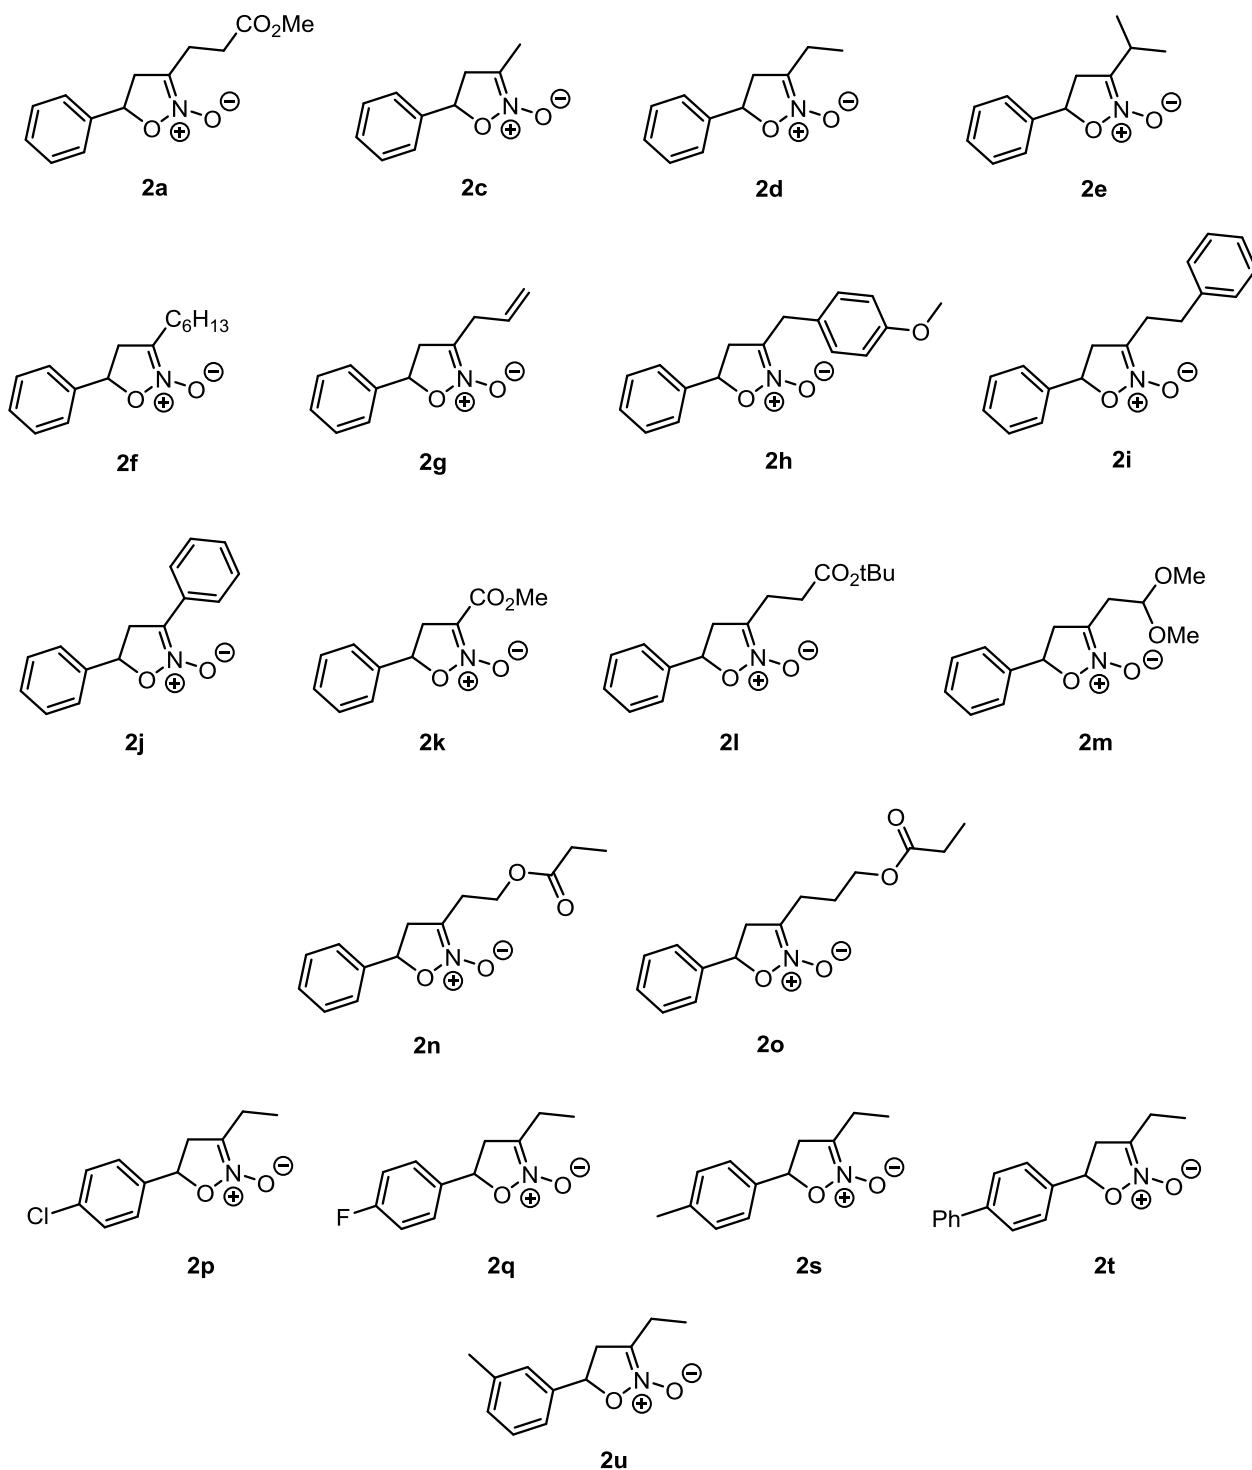

### General procedure 3 (GP3) for preparation of isoxazoline *N*-oxides 2:

To a stirred solution of sulfonium salt **4** (1.0 mmol, 2 equiv.) in 1 mL of TFE (2,2,2-trifluoroethanol) nitro compound **3** (0.5 mmol, 1 equiv.) and Et<sub>3</sub>N (160 μL, 116 mg, 1.15 mmol, 2.3 equiv.) were added and the reaction mixture was stirred for 4h at rt. Then the mixture was diluted with 25 mL of EtOAc and washed with 25 mL of 0.25M aq. solution of NaHSO<sub>4</sub>. Aqueous layer was back extracted with 25 mL of EtOAc. Combined organic layers were dried over Na<sub>2</sub>SO<sub>4</sub> and the solvent was evaporated under reduced pressure. The crude material was subjected to column chromatography (PE/EtOAc 10:1 to 1:1) to give pure isoxazoline *N*-oxide **2**.

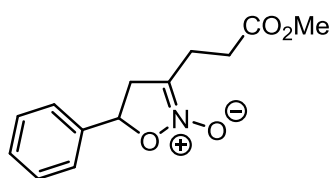

### 3-(3-Methoxy-3-oxopropyl)-5-phenyl-4,5-dihydroisoxazole 2-oxide 2a

*N*-oxide **2a** was synthesized by **GP3** from methyl 3-nitrobutyrate **3a** (74 mg, 0.5 mmol) and sulfonium bromide **4a** (326 mg, 1 mmol), yield – 94 mg (75%). White solid. Mp 39 – 40 °C (Et<sub>2</sub>O). *R<sub>f</sub>* = 0.38 (PE/EtOAc = 1:1, anisaldehyde).

<sup>1</sup>H NMR (300 MHz, CDCl<sub>3</sub>): δ 7.38 – 7.30 (m, 5H, CH<sub>Ph</sub>), 5.56 (dd, *J* = 9.5, 7.6 Hz, 1H, CH–Ph), 3.62 (s, 3H, OCH<sub>3</sub>), 3.51 (dd, *J* = 17.1, 9.6 Hz, 1H, CH<sub>2a</sub>), 3.10 (dd, *J* = 17.1, 7.6 Hz, 1H, CH<sub>2b</sub>), 2.64 (s, 4H, CH<sub>2</sub>CH<sub>2</sub>CO<sub>2</sub>Me) ppm.

<sup>13</sup>C NMR (75 MHz, CDCl<sub>3</sub>, DEPT): δ 172.5 (1C, C=O), 138.8 (1C, C<sub>Ph</sub>), 128.9, 128.7 and 125.6 (5C, CH<sub>Ph</sub>), 114.6 (1C, C=N-O), 76.0 (1C, CH–Ph), 51.9 (1C, OCH<sub>3</sub>), 41.3 (1C, CH<sub>2</sub>), 28.9 and 21.5 (2C, CH<sub>2</sub>CH<sub>2</sub>CO<sub>2</sub>Me) ppm.

FTIR (ATR): 2949 (br), 1728 (s), 1638 (s), 1498 (w), 1437 (m), 1354 (m), 1309 (m), 1244 (m), 1202 (m), 1176 (s), 1157 (s), 1075 (m), 973 (w), 867 (s), 828 (m), 767 (s), 750 (m), 698 (s), 655 (w), 625 (m), 602 (w) cm<sup>-1</sup>.

HRMS (ESI): *m/z* calcd for C<sub>13</sub>H<sub>16</sub>NO<sub>4</sub><sup>+</sup> [M+H]<sup>+</sup>: 250.1074, found 250.1082.

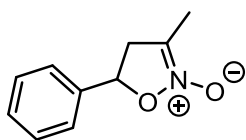

### 3-Methyl-5-phenyl-4,5-dihydroisoxazole 2-oxide 2c

*N*-oxide **2c** was synthesized by **GP3** from nitroethane **3c** (38 mg, 0.5 mmol) and sulfonium bromide **4a** (326 mg, 1 mmol), yield – 50 mg (56%). Colorless oil. *R<sub>f</sub>* = 0.42 (PE/EtOAc = 1:1, anisaldehyde).

Scale up procedure: *N*-oxide **2c** was synthesized by **GP3** from nitroethane **3c** (380 mg, 5 mmol) and sulfonium bromide **4a** (3.26 g, 10 mmol), yield – 724 mg (82%).

<sup>1</sup>H NMR (300 MHz, CDCl<sub>3</sub>): δ 7.43 – 7.33 (m, 5H, CH<sub>Ph</sub>), 5.59 (dd, *J* = 9.6, 7.6 Hz, 1H, CH–Ph), 3.49 (ddq, *J* = 17.2, 9.6, 1.8 Hz, 1H, CH<sub>2a</sub>), 3.09 (ddq, *J* = 17.2, 7.6, 1.8 Hz, 1H, CH<sub>2b</sub>), 2.03 (br s, 3H, CH<sub>3</sub>) ppm. <sup>1</sup>H NMR spectrum was in accordance with literature data.<sup>17</sup>

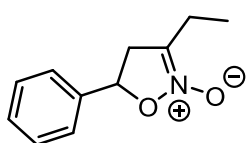

### 3-Ethyl-5-phenyl-4,5-dihydroisoxazole 2-oxide 2d

*N*-oxide **2d** was synthesized by **GP3** from 1-nitropropane **3d** (45 mg, 0.5 mmol) and sulfonium bromide **4a** (326 mg, 1 mmol), yield – 80 mg (83%). White solid. Mp 44 – 46 °C. *R<sub>f</sub>* = 0.70 (PE/EtOAc = 1:1, anisaldehyde).

<sup>1</sup>H NMR (300 MHz, CDCl<sub>3</sub>): δ 7.42 – 7.29 (m, 5H, CH<sub>Ph</sub>), 5.59 (dd, *J* = 9.6, 7.6 Hz, 1H, CH–Ph), 3.49 (ddt, *J* = 17.1, 9.6, 1.6 Hz, 1H, CH<sub>2a</sub>), 3.07 (ddt, *J* = 17.1, 7.6, 1.6 Hz, 1H, CH<sub>2b</sub>), 2.51 – 2.42 (m, 2H, CH<sub>2</sub>CH<sub>3</sub>), 1.14 (t, *J* = 7.7 Hz, 3H, CH<sub>2</sub>CH<sub>3</sub>) ppm. <sup>1</sup>H NMR spectrum was in accordance with literature data.<sup>17</sup>

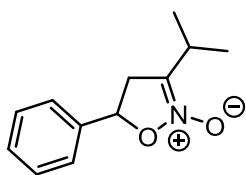

### 3-Isopropyl-5-phenyl-4,5-dihydroisoxazole 2-oxide 2e

*N*-oxide **2e** was synthesized by **GP3** from 2-methyl-1-nitropropane **3e** (52 mg, 0.5 mmol) and sulfonium bromide **4a** (326 mg, 1 mmol), yield – 40 mg (40%). Colorless oil. *R<sub>f</sub>* = 0.38 (PE/EtOAc = 3:1, anisaldehyde).

**<sup>1</sup>H NMR** (300 MHz, CDCl<sub>3</sub>): δ 7.40 – 7.29 (m, 5H, CH<sub>Ph</sub>), 5.55 (dd, *J* = 9.5, 7.5 Hz, 1H, CH–Ph), 3.44 (ddd, *J* = 17.1, 9.5, 1.0 Hz, 1H, CH<sub>2a</sub>), 3.05 – 2.94 (m, 2H, CH<sub>2b</sub> and CHMe<sub>2</sub>), 1.15 (d, *J* = 7.0 Hz, 3H, CHMe<sub>2</sub>), 1.10 (d, *J* = 7.0 Hz, 3H, CHMe<sub>2</sub>) ppm.

**<sup>13</sup>C NMR** (75 MHz, CDCl<sub>3</sub>, DEPT): δ 139.2 (1C, 1-C<sub>Ph</sub>), 129.0, 128.7 and 125.5 (5C, CH<sub>Ph</sub>), 119.9 (1C, C=N-O), 75.7 (1C, CH–Ph), 38.5 (1C, CH<sub>2</sub>), 26.4 (1C, CHMe<sub>2</sub>), 18.8 (1C, CHMe<sub>2</sub>), 18.6 (1C, CHMe<sub>2</sub>).

**HRMS** (ESI): *m/z* calcd for C<sub>12</sub>H<sub>16</sub>NO<sub>2</sub><sup>+</sup> [M+H]<sup>+</sup>: 206.1176, found 206.1182.

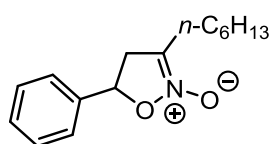

### 3-Hexyl-5-phenyl-4,5-dihydroisoxazole 2-oxide **2f**

*N*-oxide **2f** was synthesized by **GP3** from 1-nitroheptane **3f** (73 mg, 0.5 mmol) and sulfonium bromide **4a** (326 mg, 1 mmol), yield – 99 mg (80%).

White solid. Mp 42 – 44 °C. *R<sub>f</sub>* = 0.39 (PE/EtOAc = 3:1, anisaldehyde).

**<sup>1</sup>H NMR** (300 MHz, CDCl<sub>3</sub>): δ 7.43 – 7.28 (m, 5H, CH<sub>Ph</sub>), 5.57 (dd, *J* = 9.5, 7.4 Hz, 1H, CH–Ph), 3.53 – 3.40 (m, 1H, CH<sub>2a</sub>), 3.13 – 2.95 (m, 1H, CH<sub>2b</sub>), 2.44 – 2.35 (m, 2H, CH<sub>2</sub> of hexyl), 1.52 (p, *J* = 7.7 Hz, 2H, CH<sub>2</sub> of hexyl), 1.39 – 1.20 (m, 6H, CH<sub>2</sub> of hexyl), 0.92 – 0.82 (m, 3H, CH<sub>3</sub> of hexyl) ppm.

**<sup>13</sup>C NMR** (75 MHz, CDCl<sub>3</sub>, DEPT): δ 139.2 (1C, 1-C<sub>Ph</sub>), 129.0, 128.7 and 125.6 (5C, CH<sub>Ph</sub>), 115.9 (1C, C=N-O), 75.5 (1C, CH–Ph), 41.1 (1C, CH<sub>2</sub>), 31.5, 29.0, 26.2, 25.5 and 22.6 (5C, CH<sub>2</sub> of hexyl), 14.1 (1C, CH<sub>3</sub>) ppm.

**HRMS** (ESI): *m/z* calcd for C<sub>15</sub>H<sub>22</sub>NO<sub>2</sub><sup>+</sup> [M+H]<sup>+</sup>: 248.1645, found 248.1646.

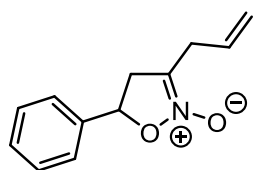

### 3-Allyl-5-phenyl-4,5-dihydroisoxazole 2-oxide **2g**

*N*-oxide **2g** was synthesized by **GP3** from 4-nitro-1-butene **3g** (51 mg, 0.5 mmol) and sulfonium bromide **4a** (326 mg, 1 mmol), yield – 32 mg (30%).

Colorless oil. *R<sub>f</sub>* = 0.22 (PE/EtOAc = 3:1, anisaldehyde).

**<sup>1</sup>H NMR** (300 MHz, CDCl<sub>3</sub>): δ 7.41 – 7.31 (m, 5H, CH<sub>Ph</sub>), 5.76 (ddt, *J* = 16.8, 10.0, 6.7 Hz, 1H, CH=CH<sub>2</sub>), 5.59 (dd, *J* = 9.6, 7.6 Hz, 1H, CH–Ph), 5.23 – 5.17 (m, 1H, CH=CH<sub>2</sub>), 5.16 – 5.14 (m, 1H, CH=CH<sub>2</sub>), 3.46 (ddt, *J* = 17.1, 9.6, 1.5 Hz, 1H, CH<sub>2a</sub>), 3.20 – 3.13 (m, 2H, CH<sub>2</sub>CH=CH<sub>2</sub>), 3.06 (ddt, *J* = 17.1, 7.6, 1.5 Hz, 1H, CH<sub>2b</sub>) ppm.

**<sup>13</sup>C NMR** (75 MHz, CDCl<sub>3</sub>, DEPT, HSQC): δ 139.0 (1C, 1-C<sub>Ph</sub>), 130.0 (1C, CH=CH<sub>2</sub>), 129.0, 128.8 and 125.6 (5C, CH<sub>Ph</sub>), 119.3 (1C, CH=CH<sub>2</sub>), 113.9 (1C, C=N-O), 75.8 (1C, CH–Ph), 40.7 (1C, CH<sub>2</sub>), 30.6 (1C, CH<sub>2</sub>CH=CH<sub>2</sub>) ppm.

**HRMS** (ESI): *m/z* calcd for C<sub>12</sub>H<sub>14</sub>NO<sub>2</sub><sup>+</sup> [M+H]<sup>+</sup>: 204.1019, found 204.1024.

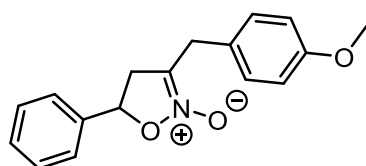

### 3-(4-Methoxybenzyl)-5-phenyl-4,5-dihydroisoxazole 2-oxide **2h**

*N*-oxide **2h** was synthesized by **GP3** from 2-(4-methoxyphenyl)-1-nitroethane **3h** (91 mg, 0.5 mmol) and sulfonium bromide **4a** (326 mg, 1 mmol), yield – 110 mg (77%). Colorless oil. *R<sub>f</sub>* = 0.29 (PE/EtOAc

= 3:1, anisaldehyde).

**<sup>1</sup>H NMR** (300 MHz, CDCl<sub>3</sub>): δ 7.40 – 7.29 (m, 5H, CH<sub>Ph</sub>), 7.14 (d, *J* = 8.6 Hz, 2H, 2,6-CH<sub>Ar</sub>), 6.84 (d, *J* = 8.6 Hz, 2H, 3,5-CH<sub>Ar</sub>), 5.55 (dd, *J* = 9.5, 7.7 Hz, 1H, CH–Ph), 3.78 (s, 3H, OCH<sub>3</sub>), 3.73 (d, *J* = 15.8 Hz, 1H, CH<sub>2a</sub>Ar), 3.64 (d, *J* = 15.8 Hz, 1H, CH<sub>2b</sub>Ar), 3.34 (ddt, *J* = 17.1, 9.5, 1.5 Hz, 1H, CH<sub>2a</sub>), 2.95 (ddt, *J* = 17.1, 7.7, 1.5 Hz, 1H, CH<sub>2b</sub>) ppm.



**<sup>13</sup>C NMR** (75 MHz, CDCl<sub>3</sub>, DEPT, HSQC): δ 159.0 (1C, 4-C<sub>Ar</sub>), 138.9 (1C, 1-C<sub>Ph</sub>), 129.9 (2C, 2,6-CH<sub>Ar</sub>), 129.0, 128.8 and 125.7 (5C, CH<sub>Ph</sub>), 127.0 (1C, 1-C<sub>Ar</sub>), 115.3 (1C, C=N-O), 114.5 (2C, 3,5-CH<sub>Ar</sub>), 75.9 (1C, CH-Ph), 55.4 (1C, OCH<sub>3</sub>), 40.7 (1C, CH<sub>2</sub>), 31.8 (1C, CH<sub>2</sub>Ar) ppm.

**HRMS** (ESI): m/z calcd for C<sub>17</sub>H<sub>18</sub>NO<sub>3</sub><sup>+</sup> [M+H]<sup>+</sup>: 284.1281, found 284.1279.

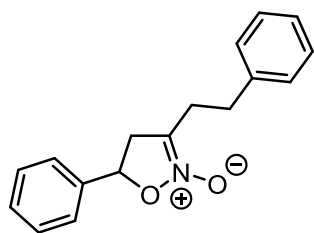

### 3-Phenethyl-5-phenyl-4,5-dihydroisoxazole 2-oxide **2i**

*N*-oxide **2i** was synthesized by **GP3** from 3-phenyl-1-nitropropane **3i** (83 mg, 0.5 mmol) and sulfonium bromide **4a** (326 mg, 1 mmol), yield – 94 mg (75%). White solid. Mp 64 – 66 °C (Et<sub>2</sub>O/PE 1:1). R<sub>f</sub> = 0.28 (PE/EtOAc = 3:1, anisaldehyde).

**<sup>1</sup>H NMR** (300 MHz, CDCl<sub>3</sub>): δ 7.44 – 7.16 (m, 10H, CH<sub>Ph</sub>), 5.51 (dd, *J* = 9.6, 7.3 Hz, 1H, CH-Ph), 3.27 (br dd, *J* = 17.1, 9.6 Hz, 1H, CH<sub>2a</sub>), 2.97 – 2.73 (m, 5H, CH<sub>2b</sub> and CH<sub>2</sub>CH<sub>2</sub>Ph) ppm.

**<sup>13</sup>C NMR** (75 MHz, CDCl<sub>3</sub>, DEPT, HSQC): δ 139.8 and 139.0 (2C, C<sub>Ph</sub>), 128.9, 128.8, 128.7, 128.3, 126.7 and 125.7 (10C, CH<sub>Ph</sub>), 115.1 (1C, C=N-O), 75.6 (1C, CH-Ph), 41.4 (1C, CH<sub>2</sub>), 31.1 and 27.6 (2C, CH<sub>2</sub>CH<sub>2</sub>Ph).

**FTIR** (ATR): 3029 (br), 1630 (s), 1495 (m), 1457 (m), 1302 (m), 1217 (s), 1136 (m), 1077 (w), 1026 (w), 870 (s), 739 (s), 697 (s), 657 (s), 568 (m) cm<sup>-1</sup>.

**HRMS** (ESI): m/z calcd for C<sub>17</sub>H<sub>18</sub>NO<sub>2</sub><sup>+</sup> [M+H]<sup>+</sup>: 268.1332, found 268.1328.

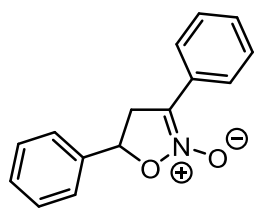

### 3,5-Diphenyl-4,5-dihydroisoxazole 2-oxide **2j**

*N*-oxide **2j** was synthesized by **GP3** from phenylnitromethane **3j** (69 mg, 0.5 mmol) and sulfonium bromide **4a** (326 mg, 1 mmol), yield – 75 mg (63%). White solid. Mp 89 – 91 °C (Et<sub>2</sub>O). R<sub>f</sub> = 0.70 (PE/EtOAc = 3:1, anisaldehyde).

**<sup>1</sup>H NMR** (300 MHz, CDCl<sub>3</sub>): δ 8.02 – 7.89 (m, 2H, CH<sub>Ph</sub>), 7.50 – 7.36 (m, 8H, CH<sub>Ph</sub>), 5.74 (dd, *J* = 9.5, 7.7 Hz, 1H, CH-Ph), 3.93 (dd, *J* = 16.2, 9.5 Hz, 1H, CH<sub>2a</sub>), 3.55 (dd, *J* = 16.2, 7.7 Hz, 1H, CH<sub>2b</sub>) ppm.

**<sup>13</sup>C NMR** (75 MHz, CDCl<sub>3</sub>, DEPT): δ 138.8 (1C, C<sub>Ph</sub>), 129.6, 129.1, 128.94, 128.85, 126.3 and 125.8 (10C, CH<sub>Ph</sub>), 126.8 (1C, C<sub>Ph</sub>), 114.1 (1C, C=N-O), 75.8 (1C, C-HPH), 40.4 (1C, CH<sub>2</sub>) ppm.

**HRMS** (ESI): m/z calcd for C<sub>15</sub>H<sub>14</sub>NO<sub>2</sub><sup>+</sup> [M+H]<sup>+</sup>: 240.1019, found 240.1021.

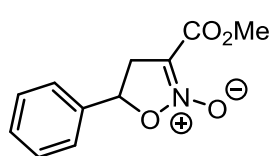

### 3-(Methoxycarbonyl)-5-phenyl-4,5-dihydroisoxazole 2-oxide **2k**

*N*-oxide **2k** was synthesized by **GP3** from methyl nitroacetate **3k** (60 mg, 0.5 mmol) and sulfonium bromide **4a** (326 mg, 1 mmol), yield – 101 mg (91%). Colorless oil. R<sub>f</sub> = 0.64 (PE/EtOAc = 2:1, anisaldehyde).

**<sup>1</sup>H NMR** (300 MHz, CDCl<sub>3</sub>): δ 7.45 – 7.34 (m, 5H, CH<sub>Ph</sub>), 5.71 (dd, *J* = 9.6, 7.8 Hz, 1H, CH-Ph), 3.85 (s, 3H, OCH<sub>3</sub>), 3.79 (dd, *J* = 16.9, 9.6 Hz, 1H, CH<sub>2a</sub>), 3.42 (dd, *J* = 16.9, 7.8 Hz, 1H, CH<sub>2b</sub>) ppm. <sup>1</sup>H NMR spectrum was in accordance with literature data.<sup>18</sup>

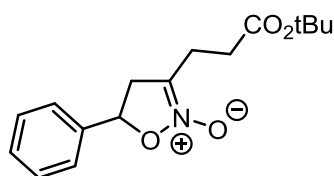

### 3-(3-(*tert*-Butoxy)-3-oxopropyl)-5-phenyl-4,5-dihydroisoxazole 2-oxide **2l**

*N*-oxide **2l** was synthesized by **GP3** from *tert*-butyl 4-nitrobutanoate **3l** (95 mg, 0.5 mmol) and sulfonium bromide **4a** (326 mg, 1 mmol), yield – 107 mg (73%). White solid. Mp 76 – 78 °C (Et<sub>2</sub>O/PE 1:1). R<sub>f</sub> = 0.28 (PE/EtOAc = 3:1, anisaldehyde).

<sup>1</sup>H NMR (300 MHz, CDCl<sub>3</sub>): δ 7.39 – 7.31 (m, 5H, CH<sub>Ph</sub>), 5.57 (dd, *J* = 9.6, 7.5 Hz, 1H, CH–Ph), 3.52 (ddt, *J* = 17.2, 9.6, 1.4 Hz, 1H, CH<sub>2a</sub>), 3.12 (ddt, *J* = 17.1, 7.5, 1.4 Hz, 1H, CH<sub>2b</sub>), 2.66 – 2.61 (m, CH<sub>2</sub>CH<sub>2</sub>CO<sub>2</sub>tBu), 2.56 – 2.52 (m, 2H, CH<sub>2</sub>CH<sub>2</sub>CO<sub>2</sub>tBu), 1.41 (s, 9H, OCM<sub>3</sub>) ppm.

<sup>13</sup>C NMR (75 MHz, CDCl<sub>3</sub>, DEPT, HSQC): δ 171.4 (1C, C=O), 139.0 (1C, C<sub>Ph</sub>), 129.0, 128.8 and 125.7 (5C, CH<sub>Ph</sub>), 114.8 (1C, C=N-O), 81.2 (1C, OCM<sub>3</sub>), 75.9 (1C, CH–Ph), 41.3 (1C, CH<sub>2</sub>), 30.6 (1C, CH<sub>2</sub>CH<sub>2</sub>CO<sub>2</sub>tBu), 21.7 (1C, CH<sub>2</sub>CH<sub>2</sub>CO<sub>2</sub>tBu), 28.1 (3C, OCM<sub>3</sub>) ppm.

HRMS (ESI): *m/z* calcd for C<sub>16</sub>H<sub>22</sub>NO<sub>4</sub><sup>+</sup> [M+H]<sup>+</sup>: 292.1543, found 292.1549.

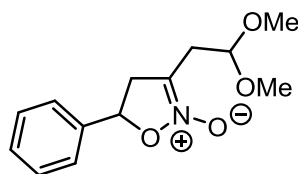

### 3-(2,2-Dimethoxyethyl)-5-phenyl-4,5-dihydroisoxazole 2-oxide **2m**

*N*-oxide **2m** was synthesized by **GP3** from 3-nitropropanal dimethylacetal **3m** (75 mg, 0.5 mmol) and sulfonium bromide **4a** (326 mg, 1 mmol), yield – 50 mg (40%). Colorless oil. R<sub>f</sub> = 0.25 (PE/EtOAc = 2:1, anisaldehyde).

<sup>1</sup>H NMR (300 MHz, CDCl<sub>3</sub>): δ 7.40 – 7.29 (m, 5H, CH<sub>Ph</sub>), 5.56 (dd, *J* = 9.6, 7.5 Hz, 1H, CH–Ph), 4.59 (t, *J* = 5.4 Hz, 1H, CH<sub>2</sub>CH(OMe)<sub>2</sub>), 3.52 (ddt, *J* = 17.3, 9.6, 1.4 Hz, 1H, CH<sub>2a</sub>), 3.34 (s, 3H, OMe), 3.35 – 3.28 (m, 3H, OMe), 3.12 (ddt, *J* = 17.3, 7.5, 1.5 Hz, 1H, CH<sub>2b</sub>), 2.72 (br d, *J* = 5.4 Hz, 3H, CH<sub>2</sub>CH(OMe)<sub>2</sub>) ppm.

<sup>13</sup>C NMR (75 MHz, CDCl<sub>3</sub>, DEPT, HSQC): δ 139.0 (1C, C<sub>Ph</sub>), 128.9, 128.7 and 125.7 (5C, CH<sub>Ph</sub>), 112.6 (1C, C=N), 101.2 (1C, CH<sub>2</sub>CH(OMe)<sub>2</sub>), 76.1 (1C, CH–Ph), 53.94 and 53.91 (2C, 2OMe), 41.4 (1C, CH<sub>2</sub>), 30.5 (1C, CH<sub>2</sub>CH(OMe)<sub>2</sub>) ppm.

HRMS (ESI): *m/z* calcd for C<sub>13</sub>H<sub>18</sub>NO<sub>4</sub><sup>+</sup> [M+H]<sup>+</sup>: 252.1230, found 252.1240.

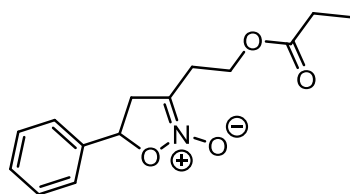

### 5-Phenyl-3-(2-(propionyloxy)ethyl)-4,5-dihydroisoxazole 2-oxide **2n**

*N*-oxide **2n** was synthesized by **GP3** from 3-nitropropyl propionate **3n** (81 mg, 0.5 mmol) and sulfonium bromide **4a** (326 mg, 1 mmol), yield – 87 mg (66%). Colorless oil. R<sub>f</sub> = 0.26 (PE/EtOAc = 2:1, anisaldehyde).

<sup>1</sup>H NMR (300 MHz, CDCl<sub>3</sub>, COSY): δ 7.45 – 7.30 (m, 5H, CH<sub>Ph</sub>), 5.61 (dd, *J* = 9.6, 7.3 Hz, 1H, CH–Ph), 4.33 – 4.20 (m, 2H, CH<sub>2</sub>CH<sub>2</sub>O), 3.55 (dd, *J* = 17.1, 9.6 Hz, 1H, CH<sub>2a</sub>), 3.12 (dd, *J* = 17.0, 7.3 Hz, 1H, CH<sub>2b</sub>), 2.77 (t, *J* = 6.1 Hz, 2H, CH<sub>2</sub>CH<sub>2</sub>O), 2.28 (q, *J* = 7.6 Hz, 2H, CH<sub>2</sub>CH<sub>3</sub>), 1.11 (t, *J* = 7.6 Hz, 3H, CH<sub>2</sub>CH<sub>3</sub>) ppm.

<sup>13</sup>C NMR (75 MHz, CDCl<sub>3</sub>, DEPT, HSQC): δ 174.1 (1C, C=O), 138.9 (1C, C<sub>Ph</sub>), 129.0, 128.8 and 125.6 (5C, CH<sub>Ph</sub>), 112.8 (1C, C=N-O), 75.9 (1C, CH–Ph), 59.8 (1C, CH<sub>2</sub>CH<sub>2</sub>O), 41.1 (1C, CH<sub>2</sub>), 27.4 (1C, CH<sub>2</sub>CH<sub>3</sub>), 26.2 (1C, CH<sub>2</sub>CH<sub>2</sub>O), 9.0 (1C, CH<sub>2</sub>CH<sub>3</sub>) ppm.

HRMS (ESI): *m/z* calcd for C<sub>14</sub>H<sub>18</sub>NO<sub>4</sub><sup>+</sup> [M+H]<sup>+</sup>: 264.1230, found 264.1236.

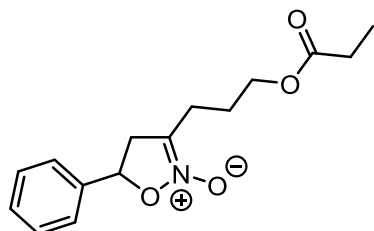

### 5-Phenyl-3-(3-(propionyloxy)propyl)-4,5-dihydroisoxazole 2-oxide **2o**

*N*-oxide **2o** was synthesized by **GP3** from 4-nitrobutyl propionate **3o** (88 mg, 0.5 mmol) and sulfonium bromide **4a** (326 mg, 1 mmol), yield – 98 mg (71%). Colorless oil.  $R_f = 0.34$  (PE/EtOAc = 2:1, anisaldehyde).

$^1\text{H NMR}$  (300 MHz,  $\text{CDCl}_3$ ):  $\delta$  7.41 – 7.32 (m, 5H,  $\text{CH}_{\text{Ph}}$ ), 5.59 (dd,  $J = 9.5, 7.5$  Hz, 1H,  $\text{CH}-\text{Ph}$ ), 4.09 (t,  $J = 6.3$  Hz, 2H,  $\text{CH}_2\text{CH}_2\text{CH}_2\text{O}$ ), 3.49 (ddt,  $J = 17.0, 9.5, 1.5$  Hz, 1H,  $\text{CH}_{2a}$ ), 3.08 (ddt,  $J = 17.0, 7.5, 1.5$  Hz, 1H,  $\text{CH}_{2b}$ ), 2.56 – 2.43 (m, 2H,  $\text{CH}_2\text{CH}_2\text{CH}_2\text{O}$ ), 2.31 (q,  $J = 7.6$  Hz, 2H,  $\text{CH}_2\text{CH}_3$ ), 1.89 (tt,  $J = 7.7, 6.3$  Hz, 2H,  $\text{CH}_2\text{CH}_2\text{CH}_2\text{O}$ ), 1.12 (t,  $J = 7.6$  Hz, 3H,  $\text{CH}_2\text{CH}_3$ ) ppm.

$^{13}\text{C NMR}$  (75 MHz,  $\text{CDCl}_3$ , DEPT, HSQC):  $\delta$  174.5 (1C,  $\text{C}=\text{O}$ ), 138.9 (1C,  $\text{C}_{\text{Ph}}$ ), 129.0, 128.8 and 125.6 (5C,  $\text{CH}_{\text{Ph}}$ ), 114.7 (1C,  $\text{C}=\text{N}-\text{O}$ ), 75.7 (1C,  $\text{CH}-\text{Ph}$ ), 63.3 (1C,  $\text{CH}_2\text{CH}_2\text{CH}_2\text{O}$ ), 41.1 (1C,  $\text{CH}_2$ ), 27.6 (1C,  $\text{CH}_2\text{CH}_3$ ), 24.6 (1C,  $\text{CH}_2\text{CH}_2\text{CH}_2\text{O}$ ), 23.1 (1C,  $\text{CH}_2\text{CH}_2\text{CH}_2\text{O}$ ), 9.2 (1C,  $\text{CH}_2\text{CH}_3$ ) ppm.

**HRMS** (ESI):  $m/z$  calcd for  $\text{C}_{15}\text{H}_{20}\text{NO}_4^+$  [ $\text{M}+\text{H}$ ] $^+$ : 278.1387, found 278.1386.

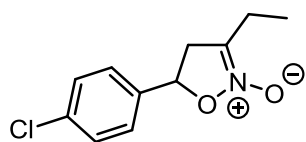

### 5-(4-Chlorophenyl)-3-ethyl-4,5-dihydroisoxazole 2-oxide **2p**

*N*-oxide **2p** was synthesized by **GP3** from 1-nitropropane **3d** (22 mg, 0.25 mmol) and sulfonium bromide **4b** (181 mg, 1 mmol), yield – 40 mg (71%). Colorless oil.  $R_f = 0.38$  (PE/EtOAc = 2:1, anisaldehyde).

$^1\text{H NMR}$  (300 MHz,  $\text{CDCl}_3$ ):  $\delta$  7.39 – 7.30 (m, 4H,  $\text{CH}_{\text{Ar}}$ ), 5.55 (dd,  $J = 9.5, 7.3$  Hz, 1H,  $\text{CH}-\text{Ar}$ ), 3.49 (ddt,  $J = 17.1, 9.5, 1.5$  Hz, 1H,  $\text{CH}_{2a}$ ), 3.01 (ddt,  $J = 17.1, 7.3, 1.6$  Hz, 1H,  $\text{CH}_{2b}$ ), 2.49 – 2.39 (m, 2H,  $\text{CH}_2\text{CH}_3$ ), 1.12 (t,  $J = 7.6$  Hz, 3H,  $\text{CH}_2\text{CH}_3$ ) ppm.

$^{13}\text{C NMR}$  (75 MHz,  $\text{CDCl}_3$ , DEPT):  $\delta$  137.8 and 134.6 (2C,  $\text{C}_{\text{Ar}}$ ), 129.2 and 127.0 (4C,  $\text{CH}_{\text{Ar}}$ ), 116.4 (1C,  $\text{C}=\text{N}-\text{O}$ ), 74.8 (1C,  $\text{CH}-\text{Ph}$ ), 40.6 (1C,  $\text{CH}_2$ ), 19.7 (1C,  $\text{CH}_2\text{CH}_3$ ), 9.9 (1C,  $\text{CH}_2\text{CH}_3$ ) ppm.

**FTIR** (ATR): 2976 (br), 1636 (s), 1491 (m), 1438 (w), 1415 (w), 1351 (w), 1265 (m), 1212 (s), 1159 (m), 1091 (s), 1014 (m), 862 (s), 833 (s), 686 (m), 621 (m), 596 (m)  $\text{cm}^{-1}$ .

**HRMS** (ESI):  $m/z$  calcd for  $\text{C}_{11}\text{H}_{13}^{35}\text{ClNO}_2^+$  [ $\text{M}+\text{H}$ ] $^+$ : 226.0629, found 226.0622.

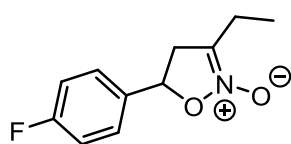

### 3-Ethyl-5-(4-fluorophenyl)-4,5-dihydroisoxazole 2-oxide **2q**

*N*-oxide **2q** was synthesized by **GP3** from 1-nitropropane **3d** (22 mg, 0.25 mmol) and sulfonium bromide **4c** (172 mg, 0.5 mmol), yield – 42 mg (81%). White solid. Mp 56 – 58 °C ( $\text{Et}_2\text{O}$ ).  $R_f = 0.32$  (PE/EtOAc = 2:1, anisaldehyde).

$^1\text{H NMR}$  (300 MHz,  $\text{CDCl}_3$ ):  $\delta$  7.37 (dd,  $J = 8.6, 5.3$  Hz, 2H, 2,6- $\text{CH}_{\text{Ar}}$ ), 7.08 (t,  $J = 8.6$  Hz, 2H, 3,5- $\text{CH}_{\text{Ar}}$ ), 5.56 (dd,  $J = 9.5, 7.5$  Hz, 1H,  $\text{CH}-\text{Ar}$ ), 3.47 (dd,  $J = 17.1, 9.5$  Hz, 1H,  $\text{CH}_{2a}$ ), 3.03 (dd,  $J = 17.1, 7.5$  Hz, 1H,  $\text{CH}_{2b}$ ), 2.52 – 2.38 (m, 2H,  $\text{CH}_2\text{CH}_3$ ), 1.13 (t,  $J = 7.6$  Hz, 3H,  $\text{CH}_2\text{CH}_3$ ) ppm.

$^{13}\text{C NMR}$  (75 MHz,  $\text{CDCl}_3$ , DEPT, HMBC):  $\delta$  162.9 (d,  $J = 247.6$  Hz, 1C, 4- $\text{C}_{\text{Ar}}$ ), 134.9 (d,  $J = 3.2$  Hz, 1C, 1- $\text{C}_{\text{Ar}}$ ), 127.6 (d,  $J = 8.4$  Hz, 2C, 2,6- $\text{CH}_{\text{Ar}}$ ), 116.6 (1C,  $\text{C}=\text{N}-\text{O}$ ), 116.0 (d,  $J = 21.8$  Hz, 2C, 3,5- $\text{CH}_{\text{Ar}}$ ), 75.1 (1C,  $\text{CH}-\text{Ar}$ ), 40.7 (1C,  $\text{CH}_2$ ), 19.8 (1C,  $\text{CH}_2\text{CH}_3$ ), 9.9 (1C,  $\text{CH}_2\text{CH}_3$ ) ppm.

$^{19}\text{F NMR}$  (282 MHz,  $\text{CDCl}_3$ ):  $\delta$  -112.93 (tt,  $J = 8.5, 5.2$  Hz) ppm.

**HRMS** (ESI):  $m/z$  calcd for  $\text{C}_{11}\text{H}_{13}\text{FNO}_2^+$  [ $\text{M}+\text{H}$ ] $^+$ : 210.0925, found 210.0926.

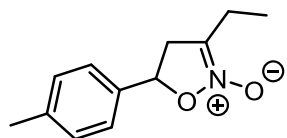

### 3-Ethyl-5-(*p*-tolyl)-4,5-dihydroisoxazole 2-oxide **2s**

*N*-oxide **2s** was synthesized by **GP3** from 1-nitropropane **3d** (22 mg, 0.25 mmol) and sulfonium bromide **4e** (170 mg, 0.5 mmol), yield – 44 mg (86%). White solid. Mp 79 – 81 °C (Et<sub>2</sub>O/PE 1:1). *R<sub>f</sub>* = 0.46 (PE/EtOAc = 2:1, anisaldehyde).

<sup>1</sup>H NMR (300 MHz, CDCl<sub>3</sub>): δ 7.30 (d, *J* = 8.1 Hz, 2H, 2,6-CH<sub>Ar</sub>), 7.21 (d, *J* = 8.1 Hz, 2H, 3,5-CH<sub>Ar</sub>), 5.57 (dd, *J* = 9.4, 7.7 Hz, 1H, CH–Ar), 3.47 (dd, *J* = 17.1, 9.5 Hz, 1H, CH<sub>2a</sub>), 3.07 (dd, *J* = 17.1, 7.7 Hz, 1H, CH<sub>2b</sub>), 2.53 – 2.43 (m, 2H, CH<sub>2</sub>CH<sub>3</sub>), 2.37 (s, 3H, CH<sub>3</sub>), 1.15 (t, *J* = 7.6 Hz, 3H, CH<sub>2</sub>CH<sub>3</sub>) ppm.

<sup>13</sup>C NMR (75 MHz, CDCl<sub>3</sub>, DEPT): δ 138.7 and 136.0 (2C, C<sub>Ar</sub>), 129.6 and 125.7 (4C, CH<sub>Ar</sub>), 116.9 (1C, C=N-O), 75.7 (1C, CH–Ph), 40.5 (1C, CH<sub>2</sub>), 21.3 (1C, CH<sub>3</sub>), 19.7 (1C, CH<sub>2</sub>CH<sub>3</sub>), 9.9 (1C, CH<sub>2</sub>CH<sub>3</sub>) ppm.

HRMS (ESI): *m/z* calcd for C<sub>12</sub>H<sub>16</sub>NO<sub>2</sub><sup>+</sup> [M+H]<sup>+</sup>: 206.1176, found 206.1168.

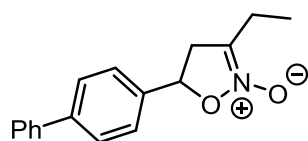

### 5-([1,1'-Biphenyl]-4-yl)-3-ethyl-4,5-dihydroisoxazole 2-oxide **2t**

*N*-oxide **2t** was synthesized by **GP3** from 1-nitropropane **3d** (22 mg, 0.25 mmol) and sulfonium bromide **4f** (201 mg, 0.5 mmol), yield – 45 mg (67%). Colorless oil. *R<sub>f</sub>* = 0.42 (PE/EtOAc = 2:1, anisaldehyde).

<sup>1</sup>H NMR (300 MHz, CDCl<sub>3</sub>): δ 7.65 – 7.56 (m, 4H, CH<sub>Ar</sub>), 7.50 – 7.33 (m, 5H, CH<sub>Ar</sub>), 5.64 (dd, *J* = 9.5, 7.5 Hz, 1H, CH–Ar), 3.52 (dd, *J* = 17.1, 9.5 Hz, 1H, CH<sub>2a</sub>), 3.11 (dd, *J* = 17.1, 7.5 Hz, 1H, CH<sub>2b</sub>), 2.56 – 2.41 (m, 2H, CH<sub>2</sub>CH<sub>3</sub>), 1.16 (t, *J* = 7.6 Hz, 3H, CH<sub>2</sub>CH<sub>3</sub>) ppm.

<sup>13</sup>C NMR (75 MHz, CDCl<sub>3</sub>, DEPT): δ 141.8, 140.5 and 138.1 (3C, C<sub>Ar</sub>), 129.0, 127.7, 127.7, 127.2 and 126.1 (9C, CH<sub>Ar</sub>), 116.7 (1C, C=N-O), 75.5 (1C, CH–Ar), 40.6 (1C, CH<sub>2</sub>), 19.8 (1C, CH<sub>2</sub>CH<sub>3</sub>), 9.9 (1C, CH<sub>2</sub>CH<sub>3</sub>) ppm.

FTIR (ATR): 2975 (w), 1632 (s), 1484 (m), 1449 (m), 1362 (m), 1269 (m), 1212 (s), 1158 (m), 1074 (m), 1006 (m), 927 (w), 865 (s), 839 (s), 822 (s), 765 (s), 699 (s), 589 (m) cm<sup>-1</sup>.

HRMS (ESI): *m/z* calcd for C<sub>17</sub>H<sub>18</sub>NO<sub>2</sub><sup>+</sup> [M+H]<sup>+</sup>: 268.1332, found 268.1334.

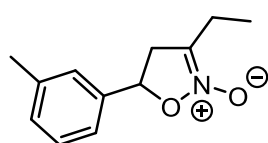

### 3-Ethyl-5-(*m*-tolyl)-4,5-dihydroisoxazole 2-oxide **2u**

*N*-oxide **2u** was synthesized by **GP3** from 1-nitropropane **3d** (22 mg, 0.25 mmol) and sulfonium bromide **4g** (170 mg, 0.5 mmol), yield – 39 mg (76%). Colorless oil. *R<sub>f</sub>* = 0.46 (PE/EtOAc = 2:1, anisaldehyde).

<sup>1</sup>H NMR (300 MHz, CDCl<sub>3</sub>): δ 7.31 – 7.12 (m, 4H, CH<sub>Ar</sub>), 5.54 (dd, *J* = 9.5, 7.6 Hz, 1H, CH–Ar), 3.47 (dd, *J* = 17.1, 9.6 Hz, 1H, CH<sub>2a</sub>), 3.06 (dd, *J* = 17.1, 7.6 Hz, 1H, CH<sub>2b</sub>), 2.51 – 2.40 (m, 2H, CH<sub>2</sub>CH<sub>3</sub>), 2.36 (s, 3H, CH<sub>3</sub>), 1.13 (t, *J* = 7.6 Hz, 3H, CH<sub>2</sub>CH<sub>3</sub>) ppm.

<sup>13</sup>C NMR (75 MHz, CDCl<sub>3</sub>, DEPT): δ 139.1 and 138.8 (2C, C<sub>Ar</sub>), 129.5, 128.9, 126.2 and 122.7 (4C, CH<sub>Ar</sub>), 116.8 (1C, C=N-O), 75.6 (1C, CH–Ar), 40.6 (1C, CH<sub>2</sub>), 21.5 (1C, CH<sub>3</sub>), 19.8 (1C, CH<sub>2</sub>CH<sub>3</sub>), 9.9 (1C, CH<sub>2</sub>CH<sub>3</sub>) ppm.

HRMS (ESI): *m/z* calcd for C<sub>12</sub>H<sub>16</sub>NO<sub>2</sub><sup>+</sup> [M+H]<sup>+</sup>: 206.1176, found 206.1179.

## 7. Post transformations of nitro cyclopropanes and isoxazoline *N*-oxides

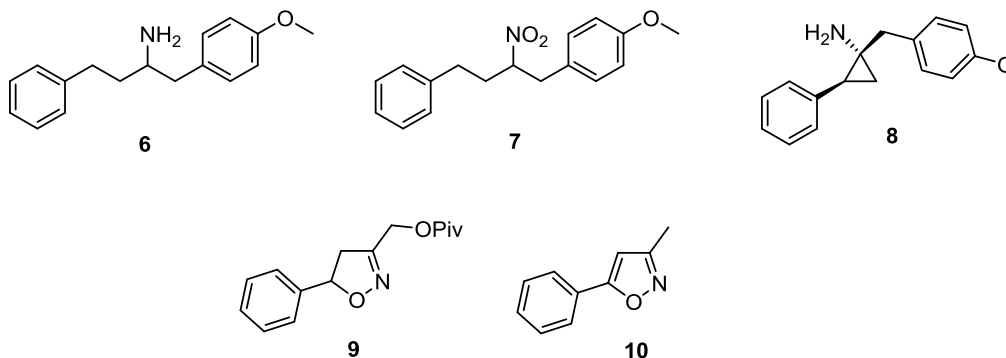

### Hydrogenation to amine 6 (Scheme 6, Part B):

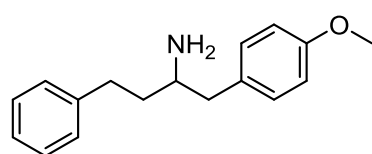

#### 1-(4-Methoxyphenyl)-4-phenylbutan-2-amine 6

To a stirred solution of nitrocyclopropane **1h** (56 mg, 0.2 mmol) in 2 mL of MeOH 5% Pd/C (50 mg) was added. Resulted mixture was hydrogenated under atmospheric pressure (balloon) of H<sub>2</sub> for 6h. After that solid catalyst was filtered off. The solvent was evaporated and the crude product was purified by flash column chromatography (eluent MeOH) to give pure amine **6**, yield – 37 mg (73%). Colorless oil. R<sub>f</sub> = 0.50 (MeOH, ninhydrin).

**<sup>1</sup>H NMR** (300 MHz, CDCl<sub>3</sub>, COSY): δ 7.36 – 7.28 (m, 2H, CH<sub>Ph</sub>), 7.24 – 7.19 (m, 3H, CH<sub>Ph</sub>), 7.13 (d, *J* = 8.5 Hz, 2H, 2,6-CH<sub>Ar</sub>), 6.88 (d, *J* = 8.5 Hz, 2H, 3,5-CH<sub>Ar</sub>), 3.82 (s, 3H, OCH<sub>3</sub>), 3.01 (tt, *J* = 8.5, 4.8 Hz, 1H, CHNH<sub>2</sub>), 2.90 – 2.77 (m, 2H, CH<sub>2a</sub>Ar and PhCH<sub>2a</sub>CH<sub>2</sub>), 2.70 (ddd, *J* = 13.7, 10.0, 6.1 Hz, 1H, PhCH<sub>2b</sub>CH<sub>2</sub>), 2.47 (dd, *J* = 13.5, 8.6 Hz, 1H, CH<sub>2b</sub>Ar), 1.85 (dddd, *J* = 13.5, 10.6, 6.1, 4.8 Hz, 1H, PhCH<sub>2</sub>CH<sub>2a</sub>), 1.68 (dddd, *J* = 13.5, 10.0, 7.8, 5.9 Hz, 1H, PhCH<sub>2</sub>CH<sub>2b</sub>), 1.30 (br s, 2H, NH<sub>2</sub>) ppm.

**<sup>13</sup>C NMR** (75 MHz, CDCl<sub>3</sub>, DEPT, HSQC): δ 158.2 (1C, 4-C<sub>Ar</sub>), 142.3 (1C, C<sub>Ph</sub>), 131.5 (1C, C<sub>Ar</sub>), 130.3 (2C, 2,6-CH<sub>Ar</sub>), 128.5, 128.5 and 125.9 (5C, CH<sub>Ph</sub>), 114.0 (2C, 3,5-CH<sub>Ar</sub>), 55.3 (1C, OCH<sub>3</sub>), 52.5 (1C, CHNH<sub>2</sub>), 43.9 (1C, CH<sub>2</sub>Ar), 39.4 (1C, PhCH<sub>2</sub>CH<sub>2</sub>), 32.8 (1C, PhCH<sub>2</sub>CH<sub>2</sub>) ppm.

**FTIR** (ATR): 3332 (w), 3173 (br), 2912 (br), 1609 (m), 1582 (w), 1509 (s), 1452 (m), 1296 (w), 1244 (s), 1174 (m), 1105 (w), 1032 (s), 808 (m), 740 (s), 696 (s), 602 (w) cm<sup>-1</sup>.

**HRMS** (ESI): *m/z* calcd for C<sub>17</sub>H<sub>22</sub>NO<sup>+</sup> [M+H]<sup>+</sup>: 256.1696, found 256.1691.

### Hydrogenation to nitro compound 7 (Scheme 6, Part C):

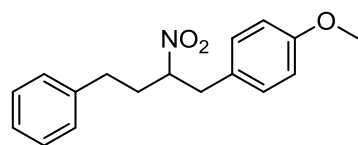

#### 1-Methoxy-4-(2-nitro-4-phenylbutyl)benzene 7

To a stirred solution of nitrocyclopropane **1h** (43 mg, 0.15 mmol) in 1 mL of MeOH PtO<sub>2</sub> (10 mg) was added. Resulted mixture was hydrogenated under atmospheric pressure (balloon) of H<sub>2</sub> for 2h. After that solid catalyst was filtered off. The solvent was evaporated and the crude product was purified by flash column chromatography (eluent PE/EtOAc, 20:1) to give pure nitro compound **7**, yield – 29 mg (67%). Colorless oil. R<sub>f</sub> = 0.62 (PE/EtOAc = 5:1, anisaldehyde).

**<sup>1</sup>H NMR** (300 MHz, CDCl<sub>3</sub>, COSY): δ 7.37 – 7.22 (m, 3H, CH<sub>Ph</sub>), 7.20 – 7.14 (m, 2H, CH<sub>Ph</sub>), 7.07 (d, *J* = 8.6 Hz, 2H, CH<sub>Ar</sub>), 6.85 (d, *J* = 8.6 Hz, 2H, CH<sub>Ar</sub>), 4.69 (dddd, *J* = 9.8, 8.5, 5.9, 3.9 Hz, 1H, CHNO<sub>2</sub>), 3.81 (s, 3H, OCH<sub>3</sub>), 3.24 (dd, *J* = 14.3, 8.5 Hz, 1H, CH<sub>2a</sub>Ar), 3.01 (dd, *J* = 14.3, 5.9 Hz, 1H, CH<sub>2b</sub>Ar),

2.73 (ddt,  $J = 13.4, 9.3, 4.6$  Hz, 1H, PhCH<sub>2a</sub>CH<sub>2</sub>), 2.66 – 2.57 (m, 1H, PhCH<sub>2b</sub>CH<sub>2</sub>), 2.46 – 2.27 (m, 1H, PhCH<sub>2</sub>CH<sub>2a</sub>), 2.17 – 1.95 (m, 1H, PhCH<sub>2</sub>CH<sub>2b</sub>) ppm.

<sup>13</sup>C NMR (75 MHz, CDCl<sub>3</sub>, DEPT, HSQC):  $\delta$  159.0 (1C, 4-C<sub>Ar</sub>), 139.8 (1C, C<sub>Ph</sub>), 127.4 (1C, C<sub>Ar</sub>), 130.0 (2C, CH<sub>Ar</sub>), 128.8 and 128.5 (4C, CH<sub>Ph</sub>), 126.6 (1C, CH<sub>Ph</sub>), 114.3 (2C, CH<sub>Ar</sub>), 89.5 (1C, CHNO<sub>2</sub>), 55.4 (1C, OCH<sub>3</sub>), 39.4 (1C, CH<sub>2</sub>Ar), 35.0 (1C, PhCH<sub>2</sub>CH<sub>2</sub>), 32.1 (1C, PhCH<sub>2</sub>CH<sub>2</sub>) ppm.

FTIR (ATR): 2996 (br), 2927 (br), 2833 (w), 1611 (w), 1544 (s), 1509 (s), 1450 (m), 1379 (m), 1302 (m), 1245 (s), 1179 (s), 1110 (m), 1034 (s), 836 (m), 745 (s), 699 (s) 595 (w) cm<sup>-1</sup>.

HRMS (ESI):  $m/z$  calcd for C<sub>17</sub>H<sub>19</sub>NaNO<sub>3</sub><sup>+</sup> [M+Na]<sup>+</sup>: 308.1257, found 308.1256.

### Reduction to amino cyclopropane **8** (Scheme 6, Part D):

#### *Rel* (1*S*,2*S*)-1-(4-methoxybenzyl)-2-phenylcyclopropan-1-amine **8**

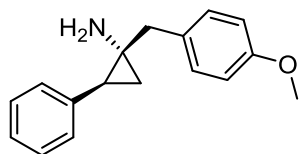

To a stirred solution of nitrocyclopropane **1h** (28 mg, 0.1 mmol, 1 equiv.) in 1 mL of MeOH 1M aq. HCl (2 mL, 2 mmol, 20 equiv.) was added followed by Zn dust (activated<sup>19</sup> by consecutive washing with 1M aq. HCl, water, EtOH and Et<sub>2</sub>O prior to use) (130 mg, 2 mmol, 20 equiv.) in one portion. Reaction mixture was stirred for 14h, diluted with 10 mL of CH<sub>2</sub>Cl<sub>2</sub> and washed with 10 mL of saturated aq. solution of NaHCO<sub>3</sub>. Aqueous phase was washed with 10 mL of CH<sub>2</sub>Cl<sub>2</sub>. Combined organic phase was dried over anhydrous Na<sub>2</sub>SO<sub>4</sub>. Then the solvent was evaporated, and crude material was purified by flash column chromatography (EtOAc) to give pure amino cyclopropane **8**, yield – 17 mg (68%). Colorless oil.  $R_f = 0.50$  (EtOAc, ninhydrin).

<sup>1</sup>H NMR (300 MHz, CDCl<sub>3</sub>):  $\delta$  7.38 – 7.20 (m, 5H, CH<sub>Ph</sub>), 6.99 (d,  $J = 8.6$  Hz, 2H, 2,6-CH<sub>Ar</sub>), 6.82 (d,  $J = 8.6$  Hz, 2H, 3,5-CH<sub>Ar</sub>), 3.80 (s, 3H, OCH<sub>3</sub>), 2.60 (dd,  $J = 14.7, 1.2$  Hz, 1H, CH<sub>2a</sub>Ar), 2.38 – 2.30 (m, 2H, CH<sub>2b</sub>Ar and CH<sub>Ph</sub>), 1.66 (br s, 2H, NH<sub>2</sub>), 1.31 – 1.21 (m, 1H, CH<sub>2a</sub>), 1.16 (ddd,  $J = 9.2, 5.3, 1.0$  Hz, 1H, CH<sub>2b</sub>) ppm.

<sup>13</sup>C NMR (75 MHz, CDCl<sub>3</sub>, DEPT, HSQC):  $\delta$  158.3 (1C, 4-C<sub>Ar</sub>), 139.2 (1C, C<sub>Ph</sub>), 131.4 (1C, C<sub>Ar</sub>), 130.3 (2C, CH<sub>Ar</sub>), 128.8, 128.3 and 126.1 (5C, CH<sub>Ph</sub>), 113.9 (2C, CH<sub>Ar</sub>), 55.4 (1C, OCH<sub>3</sub>), 41.5 (1C, CNH<sub>2</sub>), 40.5 (1C, CH<sub>2</sub>Ar), 31.8 (1C, CH<sub>Ph</sub>), 19.0 (1C, CH<sub>2</sub>) ppm.

FTIR (ATR): 1709 (w), 1511 (w), 1052 (br s), 795 (br m), 699 (w) cm<sup>-1</sup>.

HRMS (ESI):  $m/z$  calcd for C<sub>17</sub>H<sub>20</sub>NO<sup>+</sup> [M+H]<sup>+</sup>: 254.1539, found 254.1540.

### Cyclopropane – *N*-oxide rearrangement (Scheme 6, Part E):

To a mixture of nitro cyclopropane **1d** (57 mg, 0.3 mmol, 1 equiv.), Yb(OTf)<sub>3</sub>·6H<sub>2</sub>O (66 mg, 0.09 mmol, 0.3 equiv.) and MS4Å (90 mg) 0.6 mL of CH<sub>2</sub>Cl<sub>2</sub> was added under Ar atmosphere at rt. The mixture was stirred for 14h. After that the reaction mass was diluted with 25 mL of EtOAc and washed with 25 mL of Brine. Aqueous layer was back extracted with 25 mL of EtOAc. Combined organic phase was dried over anhydrous Na<sub>2</sub>SO<sub>4</sub>. The solvent was evaporated, and crude material was purified by flash column chromatography (eluent PE/EtOAc, 2:1) to give pure isoxazoline *N*-oxide **2d**, yield – 50 mg (88%).

### Acylation of *N*-oxide **2c** (Scheme 6, Part F):

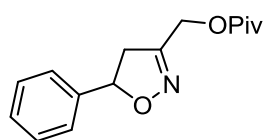

### (5-Phenyl-4,5-dihydroisoxazol-3-yl)methyl pivalate **9** and 3-Methyl-5-phenylisoxazole **10**

To a stirred solution of isoxazoline *N*-oxide **2c** (177 mg, 1 mmol, 1 equiv.) in 2 mL of CH<sub>2</sub>Cl<sub>2</sub> Et<sub>3</sub>N (417 μL, 303 mg, 3 mmol, 3 equiv.) and PivCl (246 μL, 241 mg, 2 mmol, 2 equiv.) were added at -15 °C. Reaction mixture was warmed up to rt and stirred for 72h. Then the mixture was diluted with 50 mL of EtOAc and washed with 50 mL of 0.25M aq. solution of NaHSO<sub>4</sub>. Aqueous layer was back extracted with 25 mL of EtOAc. Combined organic layers were dried over Na<sub>2</sub>SO<sub>4</sub> and the solvent was evaporated under reduced pressure. The crude material was subjected to column chromatography (eluent PE/EtOAc, 4:1) to give target isoxazoline **9** (217 mg, 83%) and isoxazole **10** (20 mg, 13%) as colorless oils.

#### Isoxazoline **9**:

R<sub>f</sub> = 0.49 (PE/EtOAc = 3:1, anisaldehyde).

<sup>1</sup>H NMR (300 MHz, CDCl<sub>3</sub>): δ 7.45 – 7.28 (m, 5H, CH<sub>Ph</sub>), 5.63 (dd, *J* = 11.1, 8.3 Hz, 1H, CH<sub>Ph</sub>), 4.90 (s, 2H, CH<sub>2</sub>OPiv), 3.42 (dd, *J* = 17.3, 11.1 Hz, 1H, CH<sub>2a</sub>), 2.97 (dd, *J* = 17.3, 8.3 Hz, 1H, CH<sub>2b</sub>), 1.21 (s, 9H, CMe<sub>3</sub>) ppm.

<sup>13</sup>C NMR (75 MHz, CDCl<sub>3</sub>, DEPT): δ 177.9 (1C, C=O), 154.4 (1C, C=N), 140.6 (1C, C<sub>Ph</sub>), 128.9, 128.4 and 125.6 (5C, CH<sub>Ph</sub>), 82.5 (1C, CH<sub>Ph</sub>), 58.7 (1C, CH<sub>2</sub>OPiv), 43.3 (1C, CH<sub>2</sub>), 39.0 (1C, CMe<sub>3</sub>), 27.2 (3C, CMe<sub>3</sub>) ppm.

FTIR (ATR): 2972 (w), 1731 (s), 1479 (w), 1397 (w), 1278 (m), 1137 (s), 1031 (w), 885 (br m), 757 (m), 697 (m) cm<sup>-1</sup>.

HRMS (ESI): *m/z* calcd for C<sub>15</sub>H<sub>20</sub>NO<sub>3</sub><sup>+</sup> [M+H]<sup>+</sup>: 262.1438, found 262.1442.

#### Isoxazole **10**:

R<sub>f</sub> = 0.49 (PE/EtOAc = 3:1, anisaldehyde).

<sup>1</sup>H NMR (300 MHz, CDCl<sub>3</sub>, characteristic signals): δ 7.77 – 7.73 (m, 2H, CH<sub>Ph</sub>), 6.36 (s, 1H, 4-CH), 2.35 (s, 3H, CH<sub>3</sub>) ppm.

<sup>13</sup>C NMR (75 MHz, CDCl<sub>3</sub>, DEPT, characteristic signals) δ 160.4 (1C, 5-C), 130.1 and 129.0 (4C, CH<sub>Ph</sub>), 100.3 (4-CH), 11.6 (1C, CH<sub>3</sub>) ppm.

NMR spectra were in accordance with literature data.<sup>20</sup>

## 8. DFT calculations

DFT calculations were performed with the Gaussian 16 Rev C.01.<sup>21</sup> M11 DFT functional with cc-pvdz+d basis set was used for geometry optimization, calculations of thermodynamics and kinetics. Calculations were performed in gas phase, 2,2,2-trifluoroethanol or ethyl acetate (SMD model). The approach of Martin and co-workers was followed for free energy correction in solution,<sup>22,23</sup> particularly, pressures of  $p = 251$  and  $336$  atm were used for solvents EtOAc and TFE, respectively. Cartesian coordinates are given in angstroms; absolute energies for all substances are given in hartrees. Analysis of vibrational frequencies was performed for all optimized structures. All compounds, except transition state structures, were characterized by only real vibrational frequencies. TS were characterized by one imaginary frequency. Wavefunction stability, using stable keyword, was also checked for each molecule.

For calculations of optimized geometries, frequencies and thermodynamics, following keywords were used (calculations in 2,2,2-trifluoroethanol as an example):

```
# opt=calcfc freq cc-pvdz+d m11 scf=xqc nosymm scrf=(smd,solvent=2,2,2-TriFluoroEthanol)
pressure=336 test
```

The same parameters were calculated for transition state structures with keywords:

```
# opt=(calcfc,ts,noeigentest) freq scf=xqc cc-pvdz+d m11 nosymm scrf=(smd,solvent=2,2,2-
TriFluoroEthanol) pressure=336 test
```

IRC calculation was performed for TS and proved that TS connects products and reactants:

```
# irc=(forward,calcfc,maxcycle=150,MaxPoints=10,HPC) scf=xqc cc-pvdz+d m11
nosymm scrf=(smd,solvent=2,2,2-TriFluoroEthanol) pressure=336 test
```

```
# irc=( reverse,calcfc,maxcycle=150,MaxPoints=10,HPC) scf=xqc cc-pvdz+d m11 nosymm
scrf=(smd,solvent=2,2,2-TriFluoroEthanol) pressure=336 test
```



## 8.1 Calculations in gas phase

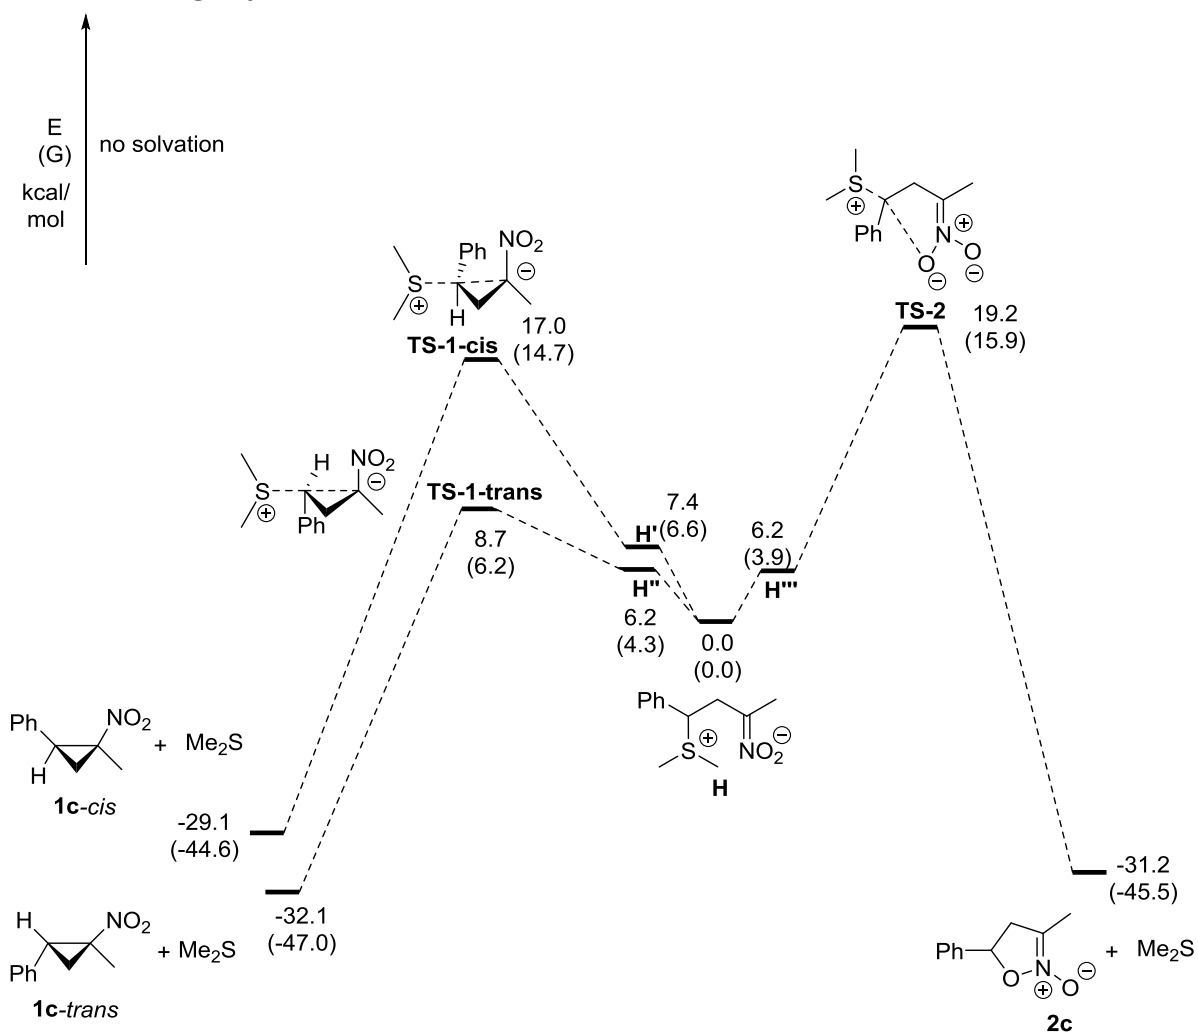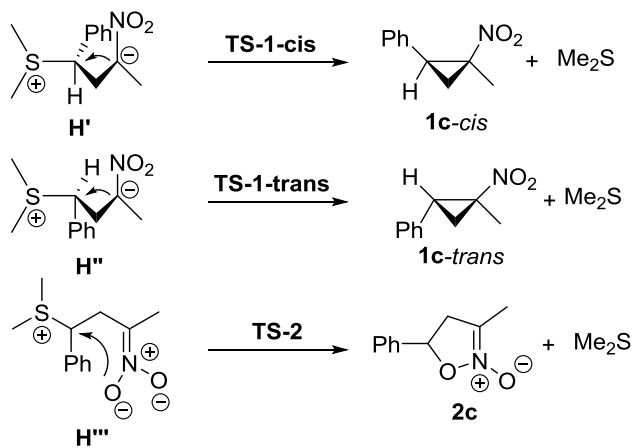

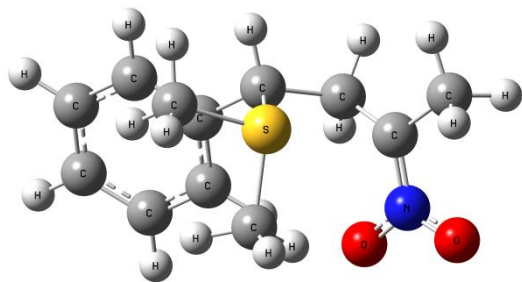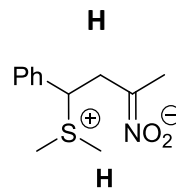

Charge 0; multiplicity 1

C -2.16594000 5.74905800 -1.90989800  
 C -1.63163800 4.47070200 -1.33943300  
 C -2.34749600 3.15882500 -1.42879000  
 C -3.12958500 2.77153200 -0.13226700  
 N -0.31119100 4.45107900 -1.04434500  
 O 0.36347700 5.49073100 -1.13099100  
 O 0.21636500 3.36645500 -0.60253200  
 S -2.85990700 4.19535200 1.03279400  
 H -4.22449500 2.84185400 -0.28525300  
 C -3.97635000 3.69211700 2.37308000  
 C -1.27996100 3.90721300 1.83706400  
 H -1.93580300 6.60204500 -1.24497600  
 H -1.70904400 5.99134000 -2.89104900  
 H -3.26217900 5.68585500 -2.04083800  
 H -1.62300900 2.35739000 -1.64468500  
 H -5.01319800 3.75597500 2.00207100  
 H -3.83799500 4.41445500 3.19433100  
 H -3.74360700 2.66785400 2.71025500  
 H -0.52417300 3.65767400 1.04997300  
 H -1.01796400 4.85068600 2.34281000  
 H -1.39130500 3.07830000 2.55494500  
 H -3.08267600 3.18656300 -2.25355500  
 C -2.80838500 1.43789000 0.49517200  
 C -1.48366700 0.98365900 0.56012600  
 C -3.83793100 0.64043800 1.01038900  
 C -1.20518900 -0.24723300 1.15268500  
 H -0.68242200 1.60789700 0.13396100  
 C -3.55395900 -0.59166800 1.59756400  
 H -4.87971700 0.98466100 0.93765800  
 C -2.23364000 -1.03413900 1.67298900  
 H -0.16756800 -0.59871900 1.20032800  
 H -4.36863800 -1.21187700 1.98995000  
 H -2.00594600 -2.00400900 2.13154000

DFT M11; cc-pvdz+d, gas phase

Total electronic energy= -1070.371148 E<sub>0</sub>

Sum of electronic and zero-point Energies= -1070.100177 E<sub>0</sub> + E<sub>ZPE</sub>

Sum of electronic and thermal Energies= -1070.083679 E<sub>0</sub> + E<sub>tot</sub>

Sum of electronic and thermal Enthalpies= -1070.082735 E<sub>0</sub> + H<sub>corr</sub>

Sum of electronic and thermal Free Energies= -1070.143610 E<sub>0</sub> + G<sub>corr</sub>

Zero-point correction (*unscaled*) = 0.270971

Number of imaginary vibrational frequencies = 0

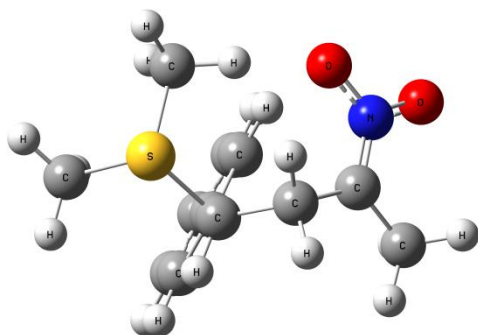

Pre-reaction conformation H'

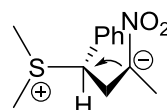

H'

Charge 0; multiplicity 1

C 0.81791500 -1.97173700 0.23759300  
 C 2.10553200 -1.94778900 0.99593500  
 H 2.07295300 -1.20307600 1.81906600  
 H 2.95044700 -1.69916400 0.32793900  
 H 2.30233900 -2.92453600 1.47636600  
 C 0.66232000 -1.53466000 -1.17057400  
 H -0.18251400 -2.09034800 -1.61884800  
 H 1.57152000 -1.78765400 -1.74559100  
 C 0.44226500 0.01937300 -1.39356700  
 H 1.22034500 0.39956200 -2.08284200  
 C 0.39091200 0.93201500 -0.19357500  
 C -0.42793600 0.67037500 0.91649600  
 H -1.07164700 -0.21969900 0.94629100  
 C -0.41878000 1.55023000 1.99785000  
 H -1.04869800 1.32941200 2.86744800  
 C 0.39229700 2.68584600 1.99019600  
 H 0.39596000 3.36485200 2.85142000  
 C 1.20697000 2.94841000 0.89064100  
 H 1.85599100 3.83202300 0.87868400  
 C 1.20498800 2.07160700 -0.19342300  
 H 1.86343700 2.26742900 -1.05184700  
 N -0.27899600 -2.31084700 0.91875400  
 O -1.44065500 -2.23750900 0.34474200  
 O -0.20469600 -2.63956100 2.11969400  
 S -1.05256800 0.20733500 -2.47039500  
 C -1.20171100 1.98942200 -2.65055700  
 H -2.13239100 2.19014200 -3.20586300  
 H -1.22232100 2.45358400 -1.64979900  
 H -0.33542500 2.34988800 -3.22950000  
 C -2.43316900 -0.19281500 -1.40208700  
 H -2.09939700 -1.07904500 -0.78529400  
 H -2.64151800 0.66905800 -0.74722100  
 H -3.29061600 -0.42736500 -2.05260900

DFT M11; cc-pvdz+d, gas phase

Total electronic energy= -1070.359276 E<sub>0</sub>

Sum of electronic and zero-point Energies= -1070.088755 E<sub>0</sub> + E<sub>ZPE</sub>

Sum of electronic and thermal Energies= -1070.072102 E<sub>0</sub> + E<sub>tot</sub>

Sum of electronic and thermal Enthalpies= -1070.071158 E<sub>0</sub> + H<sub>corr</sub>

Zero-point correction (*unscaled*) = 0.270521

Number of imaginary vibrational frequencies = 0

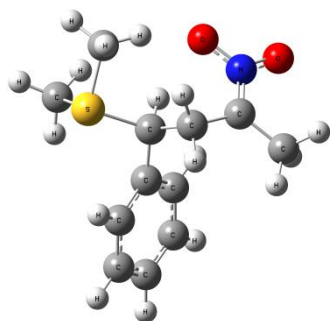

Pre-reaction conformation H''

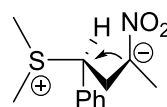

H''

Charge 0; multiplicity 1

C 1.12238300 -0.74779800 -1.67366400  
 C 2.43350400 -1.42863100 -1.44777400  
 N 0.14139900 -1.46645100 -2.23651700  
 C 0.75482300 0.62505000 -1.21571700  
 O -1.02716500 -0.92611800 -2.39300400  
 O 0.33439200 -2.65215600 -2.57304600  
 C -0.29704400 0.43261900 -0.09608100  
 S -1.50278500 1.83784000 -0.03094100  
 C -2.81669400 1.01949600 0.88699900  
 C -2.16099500 1.76319100 -1.71740000  
 H 2.30640700 -2.36360800 -0.86534100  
 H 2.90163200 -1.73372300 -2.40436100  
 H 3.13129200 -0.76347200 -0.90825000  
 H 0.32385500 1.22187000 -2.04522400  
 H -2.41517800 0.79574000 1.88936800  
 H -3.67656300 1.70407500 0.96042700  
 H -3.08423800 0.08952800 0.35620900  
 H -1.71935000 2.60059600 -2.27931600  
 H -3.25289600 1.89353900 -1.64903000  
 H -1.85816200 0.77511000 -2.14259800  
 H 1.63373500 1.16075000 -0.81590500  
 C 0.28433100 0.18108200 1.26981000  
 C 0.46332800 -1.15051800 1.66046900  
 C 0.71561700 1.21050700 2.11405300  
 C 1.06474400 -1.44697000 2.88256600  
 H 0.14418700 -1.95220200 0.98000500  
 C 1.30242300 0.91133500 3.34272400  
 H 0.60380100 2.26024700 1.80728400  
 C 1.47819000 -0.41777900 3.72804600  
 H 1.21071100 -2.49331900 3.17575400  
 H 1.63434800 1.72357200 4.00034200  
 H 1.94562000 -0.65218100 4.69179300  
 H -0.95336200 -0.39054400 -0.43612800

DFT M11; cc-pvdz+d, gas phase

Total electronic energy= -1070.361314 E<sub>0</sub>

Sum of electronic and zero-point Energies= -1070.090963 E<sub>0</sub> + E<sub>ZPE</sub>

Sum of electronic and thermal Energies= -1070.073958 E<sub>0</sub> + E<sub>tot</sub>

Sum of electronic and thermal Enthalpies= -1070.073014 E<sub>0</sub> + H<sub>corr</sub>

Sum of electronic and thermal Free Energies= -1070.136775 E<sub>0</sub> + G<sub>corr</sub>

Zero-point correction (*unscaled*) = 0.270351

Number of imaginary vibrational frequencies = 0

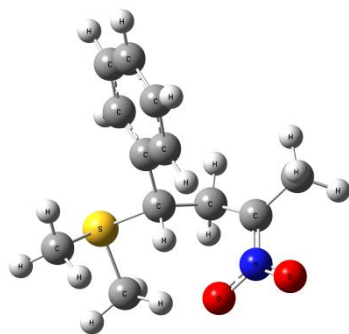

Pre-reaction conformation H'''

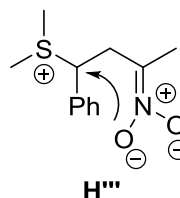

Charge 0; multiplicity 1

C -0.90499400 -1.78982500 -0.84971200  
 C -0.13839500 -2.33099900 -2.01289100  
 N -0.96977300 -2.54600400 0.25460900  
 C -1.50561500 -0.42630200 -0.75141100  
 O -1.57587100 -2.08164100 1.30296800  
 O -0.42386700 -3.66716800 0.29090500  
 C -0.66629000 0.33368400 0.30444800  
 S -1.68002400 1.58354700 1.22236900  
 H 0.89184600 -2.61553100 -1.71792200  
 H -0.60205000 -3.25562400 -2.40976900  
 H -0.08426500 -1.58500600 -2.82592000  
 H -2.56580200 -0.47831100 -0.42990700  
 H -1.45660000 0.10198700 -1.71983600  
 C 0.58577300 0.97253800 -0.23472100  
 C 1.77235600 0.23513500 -0.15715400  
 C 0.59062300 2.22087200 -0.86734000  
 C 2.94952100 0.74301400 -0.70430500  
 H 1.75365400 -0.75493000 0.31924300  
 C 1.77266800 2.73344700 -1.39976800  
 H -0.34046600 2.79846600 -0.95679500  
 C 2.95330300 1.99472200 -1.31934000  
 H 3.87235300 0.15365600 -0.64832000  
 H 1.76924800 3.71421100 -1.89013000  
 H 3.88123600 2.39595400 -1.74384400  
 C -2.96386000 0.50301800 1.90597000  
 H -3.12249400 0.80469600 2.95370200  
 H -3.88234500 0.67602800 1.32418200  
 H -2.59816400 -0.54742400 1.79780600  
 C -0.61078200 1.79555900 2.65442500  
 H -0.42640400 0.80295300 3.10039700  
 H 0.32962300 2.24029500 2.28857200  
 H -1.10532000 2.47329900 3.36821700  
 H -0.45707300 -0.39745900 1.10794100

|                                                                                              |
|----------------------------------------------------------------------------------------------|
| DFT M11; cc-pvdz+d, gas phase                                                                |
| Total electronic energy= -1070.361297 E <sub>0</sub>                                         |
| Sum of electronic and zero-point Energies= -1070.091032 E <sub>0</sub> + E <sub>ZPE</sub>    |
| Sum of electronic and thermal Energies= -1070.073954 E <sub>0</sub> + E <sub>tot</sub>       |
| Sum of electronic and thermal Enthalpies= -1070.073009 E <sub>0</sub> + H <sub>corr</sub>    |
| Sum of electronic and thermal Free Energies= -1070.137331 E <sub>0</sub> + G <sub>corr</sub> |
| Zero-point correction ( <i>unscaled</i> ) = 0.270265                                         |
| Number of imaginary vibrational frequencies = 0                                              |

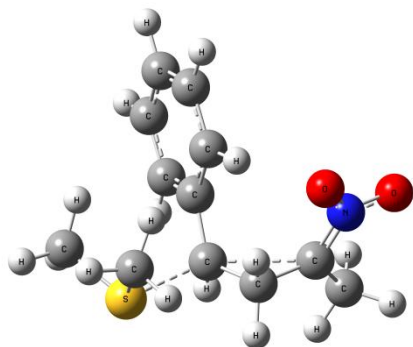

TS-1-cis

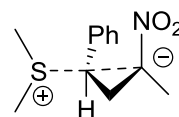

TS-1-cis

Charge 0; multiplicity 1

C 4.95385600 4.26327400 7.08152400  
 C 6.41154300 3.95789600 6.95636000  
 H 7.03442700 4.61028500 7.59940700  
 H 6.74295400 4.07594300 5.90688000  
 H 6.62800000 2.91982400 7.27703800  
 C 4.06277200 4.65938400 5.96328500  
 H 3.02507600 4.55116300 6.31608100  
 H 4.21337300 4.07401100 5.03015100  
 C 4.45257100 6.10056700 5.72830600  
 H 5.44639500 6.18177200 5.25159500  
 C 4.24574500 7.15619600 6.75667600  
 C 3.22410500 7.08135400 7.71540000  
 H 2.67641600 6.13729400 7.85605200  
 C 3.01557900 8.15456900 8.58245900  
 H 2.23210800 8.08032600 9.34593800  
 C 3.80888700 9.29885100 8.50593200  
 H 3.63595200 10.13537500 9.19370300  
 C 4.84718200 9.36407800 7.57411100  
 H 5.49715000 10.24614300 7.53139000  
 C 5.06397100 8.29693600 6.70873400  
 H 5.88946700 8.33825300 5.98348800  
 N 4.37942000 4.07694700 8.30423000  
 O 3.13258900 4.25362000 8.46114000  
 O 5.10314800 3.72062600 9.25002300  
 S 3.30867300 6.67923000 4.05688600  
 C 3.16111000 8.46982500 4.17759200  
 H 2.43283700 8.80541900 3.42026000  
 H 2.83934900 8.74818800 5.19631000  
 H 4.14901400 8.90802500 3.96324500  
 C 1.68479500 6.21699800 4.68013700  
 H 1.57809000 5.12665900 4.57194300  
 H 1.60639800 6.50954800 5.74267900  
 H 0.92262400 6.73061800 4.07158500

DFT M11; cc-pvdz+d, gas phase

Total electronic energy= -1070.344102 E<sub>0</sub>

Sum of electronic and zero-point Energies= -1070.075322 E<sub>0</sub> + E<sub>ZPE</sub>

Sum of electronic and thermal Energies= -1070.058502 E<sub>0</sub> + E<sub>tot</sub>

Sum of electronic and thermal Enthalpies= -1070.057558 E<sub>0</sub> + H<sub>corr</sub>

Sum of electronic and thermal Free Energies= -1070.120131 E<sub>0</sub> + G<sub>corr</sub>

Zero-point correction (*unscaled*) = 0.268780

Number of imaginary vibrational frequencies = 1; 240i

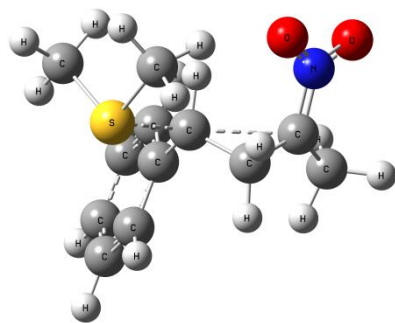

**TS-1-trans**

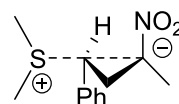

**TS-1-trans**

Charge 0; multiplicity 1

C 1.89765700 -0.17067200 -0.49066200  
 C 3.14567700 -0.83931800 -0.01762700  
 N 1.00299900 -0.91023100 -1.20156800  
 C 1.47761300 1.23080100 -0.18990700  
 O -0.09452900 -0.36905300 -1.55982000  
 O 1.25673400 -2.09769900 -1.46404800  
 C 0.52131500 0.84154500 0.90085100  
 S -0.92067500 2.34231600 1.17955900  
 C -2.05262100 1.33915100 2.15482400  
 C -1.65525200 2.17344100 -0.46335100  
 H 2.91300800 -1.79211700 0.49595100  
 H 3.81887800 -1.09652500 -0.85930400  
 H 3.69170000 -0.18018300 0.68132900  
 H 0.98280100 1.71586300 -1.04982000  
 H -1.61083700 1.23119900 3.15943100  
 H -3.02909200 1.84553300 2.22233400  
 H -2.16029400 0.34729600 1.67995200  
 H -1.28757200 3.01300000 -1.07468200  
 H -2.75107700 2.24282800 -0.36911600  
 H -1.32885900 1.20574100 -0.90387100  
 H 2.31141800 1.84612700 0.18701700  
 C 1.07337900 0.57058200 2.26464500  
 C 0.88055200 -0.68737100 2.84529900  
 C 1.78907300 1.54908300 2.96460400  
 C 1.40028900 -0.96547200 4.10862100  
 H 0.34345200 -1.46022700 2.27841100  
 C 2.30124500 1.27373500 4.23028600  
 H 1.94168500 2.53839600 2.51098300  
 C 2.10733300 0.01567400 4.80337600  
 H 1.25771000 -1.95879500 4.55031500  
 H 2.85971900 2.04517100 4.77368400  
 H 2.51580500 -0.20227900 5.79740200  
 H -0.21392300 0.10388700 0.54142800

DFT M11; cc-pvdz+d, gas phase

Total electronic energy= -1070.357291 E<sub>0</sub>

Sum of electronic and zero-point Energies= -1070.088287 E<sub>0</sub> + E<sub>ZPE</sub>

Sum of electronic and thermal Energies= -1070.071327 E<sub>0</sub> + E<sub>tot</sub>

Sum of electronic and thermal Enthalpies= -1070.070383 E<sub>0</sub> + H<sub>corr</sub>

Sum of electronic and thermal Free Energies= -1070.133676 E<sub>0</sub> + G<sub>corr</sub>

Zero-point correction (*unscaled*) = 0.269005

Number of imaginary vibrational frequencies = 1; 357i

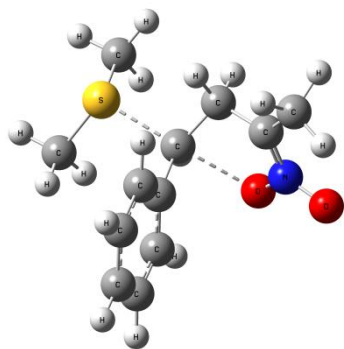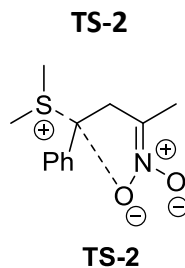

Charge 0; multiplicity 1

C 2.13020500 -0.59548500 -0.37052400  
 C 1.88233300 -0.79376400 -1.82646000  
 N 3.05924400 -1.30739200 0.26628000  
 C 1.33159100 0.30037100 0.52144400  
 O 3.19073900 -1.06379000 1.54044600  
 O 3.79231400 -2.15003600 -0.28111600  
 C 2.24641000 0.94641100 1.56303700  
 S 1.16591700 2.69952400 2.07557200  
 H 2.71594900 -1.39378700 -2.22499100  
 H 0.93825500 -1.33717600 -2.04167700  
 H 1.83961000 0.17037800 -2.37305200  
 H 0.52900200 -0.24033700 1.07309800  
 H 0.84232300 1.07798000 -0.09945900  
 C 3.53124600 1.57367500 1.11385000  
 C 4.70414000 1.34735900 1.83894300  
 C 3.55890000 2.40260900 -0.01152600  
 C 5.88800000 1.97425800 1.45835300  
 H 4.68053100 0.62460500 2.66288200  
 C 4.74580600 3.02588500 -0.39347500  
 H 2.64238200 2.55753500 -0.59833600  
 C 5.90927400 2.81897300 0.34711900  
 H 6.80884200 1.78569300 2.02282800  
 H 4.76354600 3.66949100 -1.28081700  
 H 6.84468200 3.30546800 0.04553300  
 C -0.13674300 1.94236100 3.06051200  
 H -0.64195200 2.71417300 3.66396400  
 H -0.85771300 1.49249200 2.35871300  
 H 0.29374100 1.15884400 3.70891200  
 C 2.25482500 3.30406700 3.37267100  
 H 2.58781500 2.45716800 3.99922500  
 H 3.12564000 3.75742400 2.87074700  
 H 1.72562800 4.05887800 3.97665000  
 H 2.23184600 0.54470800 2.58312300

DFT M11; cc-pvdz+d, gas phase

Total electronic energy= -1070.340495 E<sub>0</sub>

Sum of electronic and zero-point Energies= -1070.072411 E<sub>0</sub> + E<sub>ZPE</sub>

Sum of electronic and thermal Energies= -1070.055194 E<sub>0</sub> + E<sub>tot</sub>

Sum of electronic and thermal Enthalpies= -1070.054250 E<sub>0</sub> + H<sub>corr</sub>

Sum of electronic and thermal Free Energies= -1070.118245 E<sub>0</sub> + G<sub>corr</sub>

Zero-point correction (*unscaled*) = 0.268083

Number of imaginary vibrational frequencies = 1; 396i



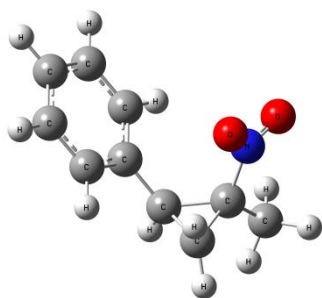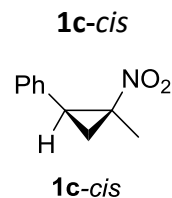

Charge 0; multiplicity 1

C 1.24129500 -1.89241200 0.43294300  
 C 2.31193800 -2.63000700 -0.32549100  
 H 3.22019400 -2.01442600 -0.42311500  
 H 1.93181900 -2.87957100 -1.33047400  
 H 2.58310900 -3.56675800 0.19126000  
 C -0.22574900 -2.14206700 0.23606600  
 H -0.83737400 -2.08228100 1.14245400  
 H -0.49813400 -2.91206500 -0.49369500  
 C 0.37156400 -0.84989000 -0.24772000  
 H 0.57764100 -0.78025500 -1.32548000  
 C 0.05351500 0.45913800 0.41153800  
 C -1.26377500 0.80322600 0.71880900  
 H -2.06998400 0.08938600 0.50575700  
 C -1.55383200 2.03917700 1.29474400  
 H -2.59206400 2.29935100 1.53351500  
 C -0.52599000 2.93925600 1.57226300  
 H -0.75296300 3.90940200 2.03018700  
 C 0.79340600 2.59850100 1.27351200  
 H 1.60735000 3.29759300 1.49954700  
 C 1.08096900 1.36515400 0.69353900  
 H 2.12131100 1.08879100 0.47210500  
 N 1.64600200 -1.53066300 1.81838900  
 O 0.77795100 -1.27088000 2.62411500  
 O 2.84170200 -1.48554400 2.03548600

|                                                                                             |
|---------------------------------------------------------------------------------------------|
| DFT M11; cc-pvdz+d, gas phase                                                               |
| Total electronic energy= -592.481950 E <sub>0</sub>                                         |
| Sum of electronic and zero-point Energies= -592.288658 E <sub>0</sub> + E <sub>ZPE</sub>    |
| Sum of electronic and thermal Energies= -592.277294 E <sub>0</sub> + E <sub>tot</sub>       |
| Sum of electronic and thermal Enthalpies= -592.276349 E <sub>0</sub> + H <sub>corr</sub>    |
| Sum of electronic and thermal Free Energies= -592.327181 E <sub>0</sub> + G <sub>corr</sub> |
| Zero-point correction ( <i>unscaled</i> ) = 0.193292                                        |
| Number of imaginary vibrational frequencies = 0                                             |

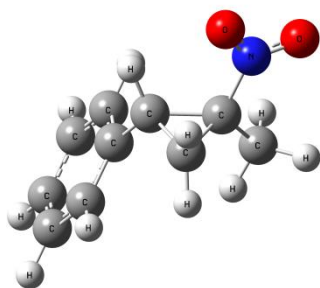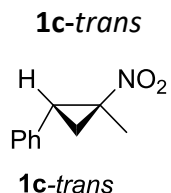

Charge 0; multiplicity 1

C 1.10326900 -0.75978700 -1.47317500  
 C 2.45236800 -1.31648000 -1.11468600  
 N 0.43659000 -1.47126200 -2.59413800  
 C 0.78060300 0.70997500 -1.40215200  
 O -0.64881500 -1.06021600 -2.96077100  
 O 1.02030500 -2.42297800 -3.06890900  
 C 0.13083200 -0.23129000 -0.43353800  
 H 2.36922400 -2.36868000 -0.79356600  
 H 3.13244000 -1.27248100 -1.98131400  
 H 2.87529700 -0.72575300 -0.28518800  
 H 0.15459500 1.11047700 -2.20512900  
 H 1.59681900 1.34943100 -1.04566400  
 C 0.52600500 -0.28957600 1.00955600  
 C 0.45316800 -1.50813100 1.69572700  
 C 0.96665100 0.84624000 1.69211500  
 C 0.81855800 -1.58884300 3.03682600  
 H 0.10653200 -2.40430500 1.16355500  
 C 1.33246400 0.76795000 3.03656400  
 H 1.01311000 1.80845300 1.16626300  
 C 1.26154000 -0.44934000 3.71075700  
 H 0.75881400 -2.54985200 3.56170900  
 H 1.67318200 1.66842800 3.56165700  
 H 1.55005700 -0.51186800 4.76678100  
 H -0.91539800 -0.47262900 -0.66159200

|                                                                                             |
|---------------------------------------------------------------------------------------------|
| DFT M11; cc-pvdz+d, gas phase                                                               |
| Total electronic energy= -592.486656 E <sub>0</sub>                                         |
| Sum of electronic and zero-point Energies= -592.292973 E <sub>0</sub> + E <sub>ZPE</sub>    |
| Sum of electronic and thermal Energies= -592.281758 E <sub>0</sub> + E <sub>tot</sub>       |
| Sum of electronic and thermal Enthalpies= -592.280813 E <sub>0</sub> + H <sub>corr</sub>    |
| Sum of electronic and thermal Free Energies= -592.330926 E <sub>0</sub> + G <sub>corr</sub> |
| Zero-point correction ( <i>unscaled</i> ) = 0.193683                                        |
| Number of imaginary vibrational frequencies = 0                                             |

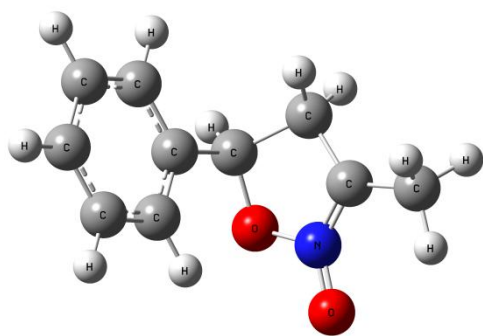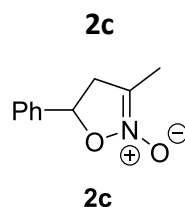

Charge 0; multiplicity 1

C -0.70126000 -1.90905400 -1.33021100  
 C -0.94260900 -2.55017500 -2.65122800  
 N 0.01312900 -2.52011000 -0.42690300  
 C -1.18581100 -0.59279200 -0.80690000  
 O 0.10074700 -1.74761900 0.77494100  
 O 0.59504100 -3.59340100 -0.40799100  
 C -0.22704900 -0.41276800 0.38925700  
 H -0.42331400 -3.52128800 -2.67281200  
 H -2.02272100 -2.71459500 -2.82029400  
 H -0.56388600 -1.91612000 -3.47333100  
 H -2.24764900 -0.64617900 -0.49643000  
 H -1.07497200 0.22234800 -1.54250700  
 C 1.02625900 0.35306200 -0.00156500  
 C 2.24435000 -0.30725100 -0.16901400  
 C 0.95157200 1.73236400 -0.21572000  
 C 3.37568300 0.41094200 -0.55922400  
 H 2.30360400 -1.38800300 0.01244800  
 C 2.08316500 2.44801800 -0.59915400  
 H -0.00572500 2.25483600 -0.07635400  
 C 3.29943500 1.78569300 -0.77408900  
 H 4.32966900 -0.11332700 -0.69255300  
 H 2.01725200 3.53090000 -0.75943200  
 H 4.19209700 2.34649700 -1.07592000  
 H -0.71881100 0.05536500 1.25847700

|                                                                                             |
|---------------------------------------------------------------------------------------------|
| DFT M11; cc-pvdz+d, gas phase                                                               |
| Total electronic energy= -592.485295 E <sub>0</sub>                                         |
| Sum of electronic and zero-point Energies= -592.290918 E <sub>0</sub> + E <sub>ZPE</sub>    |
| Sum of electronic and thermal Energies= -592.279925 E <sub>0</sub> + E <sub>tot</sub>       |
| Sum of electronic and thermal Enthalpies= -592.278981 E <sub>0</sub> + H <sub>corr</sub>    |
| Sum of electronic and thermal Free Energies= -592.328560 E <sub>0</sub> + G <sub>corr</sub> |
| Zero-point correction ( <i>unscaled</i> ) = 0.194376                                        |
| Number of imaginary vibrational frequencies = 0                                             |

## Me<sub>2</sub>S

Charge 0; multiplicity 1

S -1.93670700 2.57604300 0.01958500  
C -2.64414300 1.35277000 1.14530600  
C -2.61482800 1.93464200 -1.52743100  
H -2.31484100 1.61211100 2.16509800  
H -3.74777400 1.37500200 1.11102800  
H -2.28486000 0.33708000 0.90249000  
H -2.26357900 2.59156000 -2.34029100  
H -3.71901600 1.94742600 -1.51097000  
H -2.25753800 0.90756700 -1.72009200

|                                                                                             |
|---------------------------------------------------------------------------------------------|
| DFT M11; cc-pvdz+d, gas phase                                                               |
| Total electronic energy= -477.935584 E <sub>0</sub>                                         |
| Sum of electronic and zero-point Energies= -477.860500 E <sub>0</sub> + E <sub>ZPE</sub>    |
| Sum of electronic and thermal Energies= -477.855594 E <sub>0</sub> + E <sub>tot</sub>       |
| Sum of electronic and thermal Enthalpies= -477.854650 E <sub>0</sub> + H <sub>corr</sub>    |
| Sum of electronic and thermal Free Energies= -477.887552 E <sub>0</sub> + G <sub>corr</sub> |
| Zero-point correction ( <i>unscaled</i> ) = 0.075084                                        |
| Number of imaginary vibrational frequencies = 0                                             |

## 8.2 Calculations of competitive formation of *cis*- and *trans*- nitrocyclopropanes 1c in EtOAc

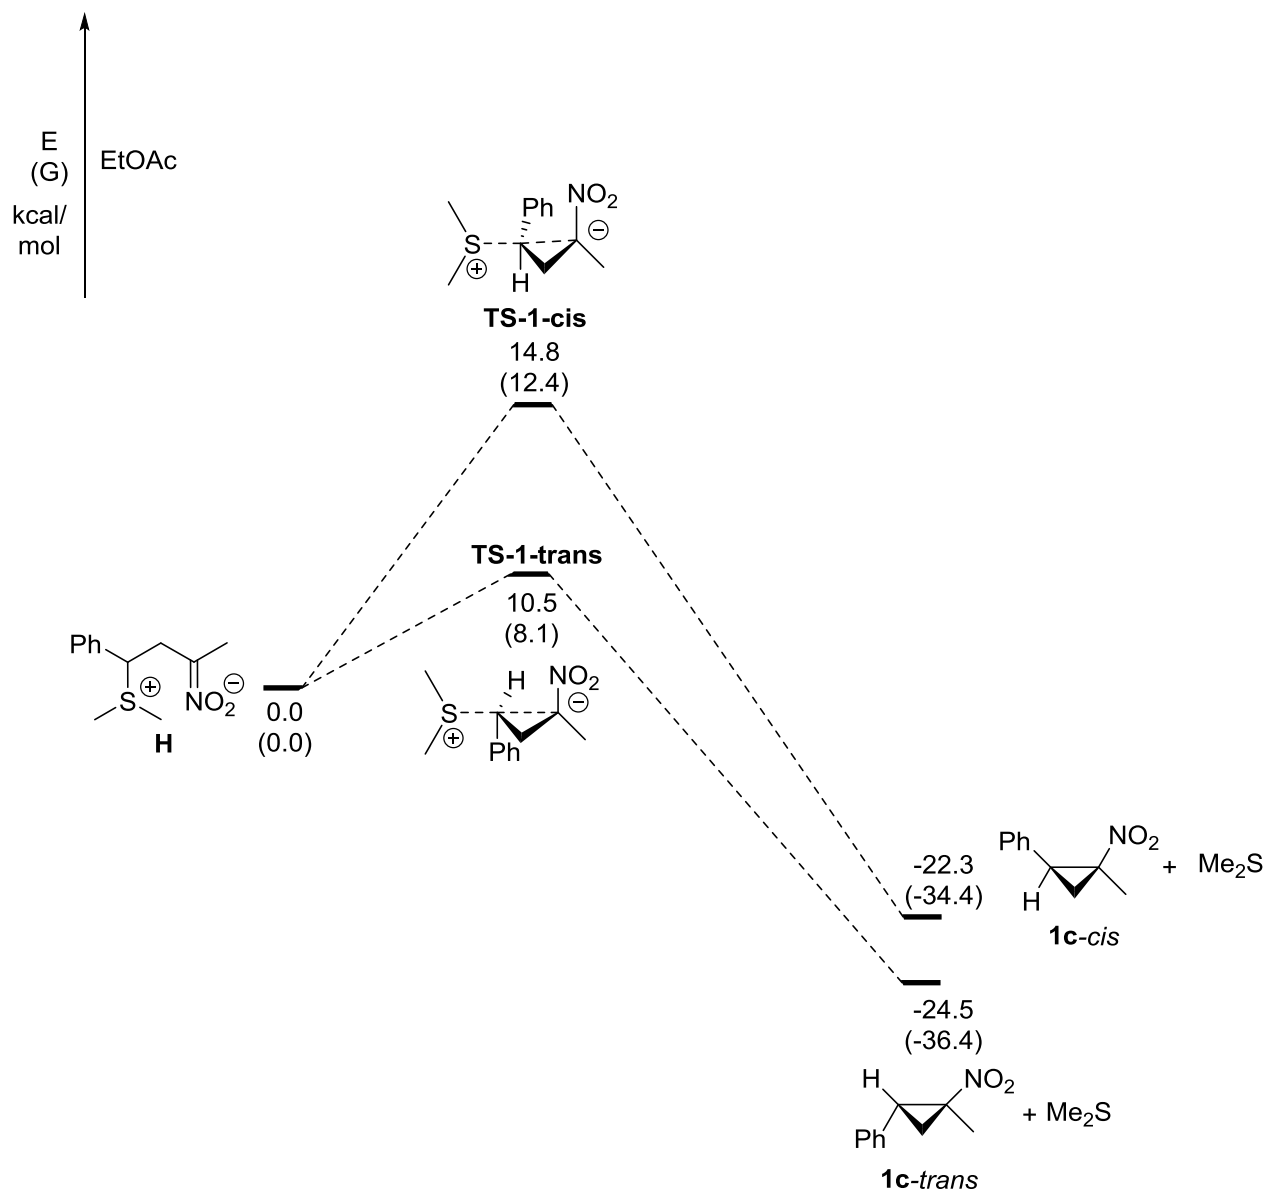

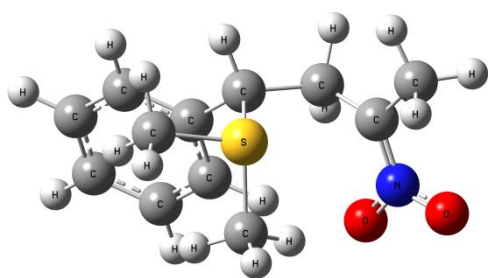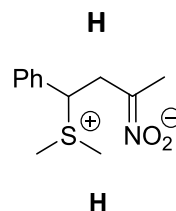

Charge 0; multiplicity 1

C -2.18092600 5.73422300 -1.92447400  
 C -1.59435500 4.44825700 -1.43128200  
 C -2.32640800 3.14301500 -1.42783500  
 C -3.10640500 2.78729000 -0.11829700  
 N -0.29908200 4.46226800 -1.10075700  
 O 0.36490000 5.52876400 -1.18597500  
 O 0.26912200 3.39268600 -0.65389900  
 S -2.86253700 4.18308000 1.07429800  
 H -4.19800300 2.86088200 -0.28381000  
 C -3.99990300 3.72282900 2.38975400  
 C -1.28509900 3.88007600 1.87218900  
 H -2.01377700 6.55395100 -1.19840300  
 H -1.71608800 6.06815600 -2.87500300  
 H -3.26847600 5.62547500 -2.08949700  
 H -1.60902900 2.33041700 -1.62360700  
 H -5.02743100 3.79419200 1.99449100  
 H -3.86421800 4.46049000 3.19873600  
 H -3.77800700 2.70472500 2.75103800  
 H -0.52389100 3.69577700 1.08058100  
 H -1.04939500 4.79509800 2.44164000  
 H -1.38059000 3.01077700 2.54395100  
 H -3.07208800 3.14036100 -2.24292700  
 C -2.79442800 1.44631100 0.50063500  
 C -1.47376400 0.97913200 0.56065200  
 C -3.83060200 0.65820100 1.01595200  
 C -1.20261000 -0.25962100 1.14100500  
 H -0.66860600 1.60332800 0.14241000  
 C -3.55512400 -0.58264700 1.59138400  
 H -4.86674400 1.01979800 0.95386900  
 C -2.23900400 -1.04116300 1.65675400  
 H -0.16798800 -0.62190100 1.18576000  
 H -4.37452400 -1.19671200 1.98504800  
 H -2.01965700 -2.01756000 2.10669100

DFT M11; cc-pvdz+d, solvent EtOAc, SMD model

Total electronic energy= -1070.402777 E<sub>0</sub>

Sum of electronic and zero-point Energies= -1070.131560 E<sub>0</sub> + E<sub>ZPE</sub>

Sum of electronic and thermal Energies= -1070.115083 E<sub>0</sub> + E<sub>tot</sub>

Sum of electronic and thermal Enthalpies= -1070.114138 E<sub>0</sub> + H<sub>corr</sub>

Sum of electronic and thermal Free Energies= -1070.169911 E<sub>0</sub> + G<sub>corr</sub>

Zero-point correction (*unscaled*) = 0.271217

Number of imaginary vibrational frequencies = 0

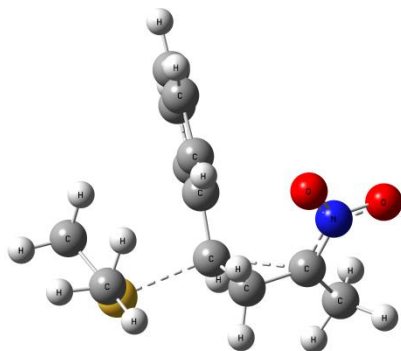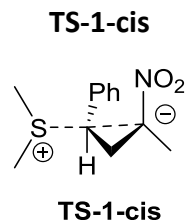

Charge 0; multiplicity 1

C 5.01779200 4.26286700 7.09852000  
 C 6.40758600 3.84256700 6.74085900  
 H 7.17334400 4.50256700 7.19305200  
 H 6.53785300 3.85087900 5.64324600  
 H 6.62664900 2.81940700 7.10703300  
 C 3.96406100 4.60763700 6.09571800  
 H 2.95866600 4.53992700 6.53631700  
 H 4.03350600 4.00515100 5.17140400  
 C 4.43986900 6.00694900 5.88570400  
 H 5.42540600 6.06298900 5.39737800  
 C 4.19762300 7.09885600 6.85211600  
 C 3.05205000 7.15328900 7.66059500  
 H 2.34370200 6.32048600 7.66495700  
 C 2.83106900 8.26102200 8.48061400  
 H 1.93464700 8.29579400 9.11188200  
 C 3.74605700 9.31289200 8.50983800  
 H 3.56718700 10.17777600 9.16091300  
 C 4.89517300 9.26119900 7.71499700  
 H 5.62203700 10.08223100 7.74126600  
 C 5.11467200 8.16378200 6.88985200  
 H 6.01182500 8.11933000 6.25638000  
 N 4.69972100 4.31804700 8.42117300  
 O 3.53233400 4.62071600 8.78578700  
 O 5.59005900 4.04929100 9.26170400  
 S 3.33895400 6.71139100 4.02875700  
 C 3.17392600 8.48925600 4.25251500  
 H 2.47179500 8.87548500 3.49347100  
 H 2.80452400 8.70941900 5.27020500  
 H 4.16664200 8.94477000 4.10004200  
 C 1.67999100 6.19659600 4.49586000  
 H 1.61540800 5.10296200 4.37266100  
 H 1.47709000 6.48011000 5.54351400  
 H 0.95435700 6.68356200 3.82221000

|                                                                                              |
|----------------------------------------------------------------------------------------------|
| DFT M11; cc-pvdz+d, solvent EtOAc, SMD model                                                 |
| Total electronic energy= -1070.379180 E <sub>0</sub>                                         |
| Sum of electronic and zero-point Energies= -1070.110758 E <sub>0</sub> + E <sub>ZPE</sub>    |
| Sum of electronic and thermal Energies= -1070.093766 E <sub>0</sub> + E <sub>tot</sub>       |
| Sum of electronic and thermal Enthalpies= -1070.092822 E <sub>0</sub> + H <sub>corr</sub>    |
| Sum of electronic and thermal Free Energies= -1070.150181 E <sub>0</sub> + G <sub>corr</sub> |
| Zero-point correction ( <i>unscaled</i> ) = 0.268422                                         |
| Number of imaginary vibrational frequencies = 1; 444 <i>i</i>                                |

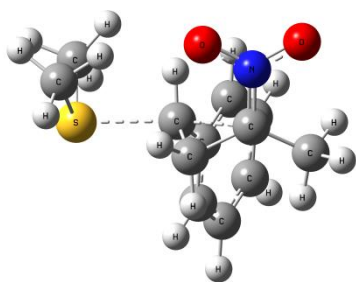

**TS-1-trans**

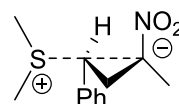

**TS-1-trans**

Charge 0; multiplicity 1

C 1.91861100 -0.13801500 -0.46804100  
 C 3.17783300 -0.73862800 0.06361900  
 N 1.10235100 -0.92717400 -1.22303600  
 C 1.44596600 1.26307300 -0.22872700  
 O 0.00952700 -0.45797000 -1.65848300  
 O 1.44114400 -2.10683700 -1.46028600  
 C 0.55572800 0.78427500 0.86137000  
 S -0.99289000 2.35614600 1.24137700  
 C -2.10975800 1.28732700 2.16258100  
 C -1.71256900 2.21952200 -0.40580200  
 H 2.97476900 -1.66339800 0.63845100  
 H 3.87108200 -1.02002800 -0.75400800  
 H 3.69272400 -0.01836800 0.72347200  
 H 0.90810900 1.68336500 -1.09290300  
 H -1.72337300 1.20657200 3.19269700  
 H -3.11645000 1.73813000 2.18018100  
 H -2.14765600 0.28879400 1.68909400  
 H -1.29372000 3.03132900 -1.02367700  
 H -2.80588400 2.34660100 -0.33381800  
 H -1.45149900 1.23575800 -0.84557900  
 H 2.25088600 1.92911500 0.11806600  
 C 1.10517900 0.52388100 2.22152200  
 C 0.76227500 -0.66168800 2.88352700  
 C 1.95425300 1.44326500 2.85198000  
 C 1.26921800 -0.93050100 4.15479000  
 H 0.10468900 -1.38561000 2.38291000  
 C 2.45582200 1.17610100 4.12379300  
 H 2.21608800 2.38192700 2.34511400  
 C 2.11575500 -0.01168800 4.77620600  
 H 1.00347200 -1.86601800 4.66219300  
 H 3.11821900 1.90134500 4.61223400  
 H 2.51459000 -0.22132600 5.77650400  
 H -0.22918200 0.09215000 0.51920700

|                                                                                              |
|----------------------------------------------------------------------------------------------|
| DFT M11; cc-pvdz+d, solvent EtOAc, SMD model                                                 |
| Total electronic energy= -1070.385997 E <sub>0</sub>                                         |
| Sum of electronic and zero-point Energies= -1070.117206 E <sub>0</sub> + E <sub>ZPE</sub>    |
| Sum of electronic and thermal Energies= -1070.100243 E <sub>0</sub> + E <sub>tot</sub>       |
| Sum of electronic and thermal Enthalpies= -1070.099299 E <sub>0</sub> + H <sub>corr</sub>    |
| Sum of electronic and thermal Free Energies= -1070.157059 E <sub>0</sub> + G <sub>corr</sub> |
| Zero-point correction ( <i>unscaled</i> ) = 0.268791                                         |
| Number of imaginary vibrational frequencies = 1; 519i                                        |



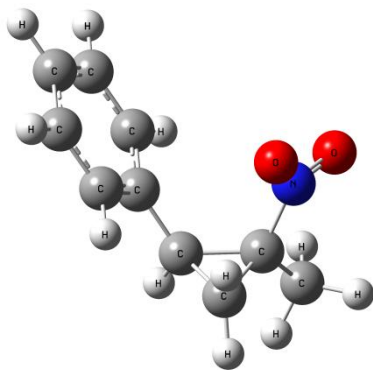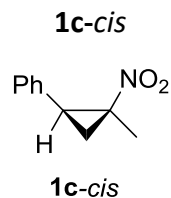

Charge 0; multiplicity 1

C 1.22748900 -1.90325400 0.44213500  
 C 2.32445500 -2.63482900 -0.28119000  
 H 3.24151400 -2.02554000 -0.33531500  
 H 1.98244400 -2.85976400 -1.30543800  
 H 2.56370500 -3.58582200 0.22627300  
 C -0.23107500 -2.12419900 0.15723900  
 H -0.89671500 -2.08513100 1.02598600  
 H -0.46357300 -2.87405400 -0.60673300  
 C 0.40424000 -0.83188200 -0.26244800  
 H 0.68391800 -0.74648000 -1.32192400  
 C 0.07403200 0.47181000 0.40092000  
 C -1.22873900 0.76664500 0.81005900  
 H -2.02084700 0.01951700 0.66905100  
 C -1.52406200 1.99844000 1.39495800  
 H -2.55117600 2.21905000 1.71167300  
 C -0.51609800 2.94523000 1.58106700  
 H -0.74729900 3.91231600 2.04474100  
 C 0.78885300 2.65559400 1.17790700  
 H 1.58735200 3.39351500 1.32527200  
 C 1.08123200 1.42593700 0.58936800  
 H 2.10922500 1.19650200 0.27576200  
 N 1.55824700 -1.58335800 1.85141400  
 O 0.65778000 -1.27563800 2.60778300  
 O 2.73500000 -1.62245100 2.16169300

|                                                                                             |
|---------------------------------------------------------------------------------------------|
| DFT M11; cc-pvdz+d, solvent EtOAc, SMD model                                                |
| Total electronic energy= -592.498252 E <sub>0</sub>                                         |
| Sum of electronic and zero-point Energies= -592.305119 E <sub>0</sub> + E <sub>ZPE</sub>    |
| Sum of electronic and thermal Energies= -592.293856 E <sub>0</sub> + E <sub>tot</sub>       |
| Sum of electronic and thermal Enthalpies= -592.292912 E <sub>0</sub> + H <sub>corr</sub>    |
| Sum of electronic and thermal Free Energies= -592.337878 E <sub>0</sub> + G <sub>corr</sub> |
| Zero-point correction ( <i>unscaled</i> ) = 0.193132                                        |
| Number of imaginary vibrational frequencies = 0                                             |

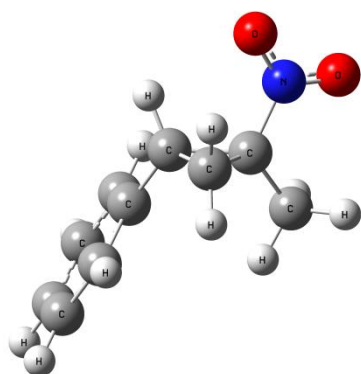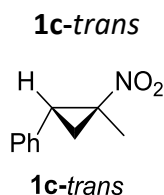

Charge 0; multiplicity 1

C 1.11074400 -0.74011300 -1.46901800  
 C 2.47866400 -1.24810200 -1.11396000  
 N 0.46574000 -1.47417900 -2.58290100  
 C 0.73602300 0.71733500 -1.39067100  
 O -0.63343500 -1.10371800 -2.95690500  
 O 1.07353500 -2.41263000 -3.05987500  
 C 0.12134900 -0.24612200 -0.42379800  
 H 2.43714400 -2.29780400 -0.77509300  
 H 3.15547500 -1.18599500 -1.98285200  
 H 2.88771500 -0.62930000 -0.29800800  
 H 0.09620900 1.10379300 -2.19017200  
 H 1.53543100 1.37991100 -1.03790700  
 C 0.51981500 -0.30260500 1.01898500  
 C 0.41243300 -1.51406300 1.71527100  
 C 0.99706000 0.82596900 1.69112400  
 C 0.77966000 -1.59470500 3.05705800  
 H 0.03659100 -2.40445300 1.19282400  
 C 1.36451400 0.74693500 3.03609700  
 H 1.07447400 1.78260400 1.15830800  
 C 1.25893700 -0.46299300 3.72120000  
 H 0.69245800 -2.54976400 3.59008500  
 H 1.73454000 1.64143300 3.55268600  
 H 1.54862700 -0.52572400 4.77750200  
 H -0.91533300 -0.53062900 -0.64508100

|                                              |
|----------------------------------------------|
| DFT M11; cc-pvdz+d, solvent EtOAc, SMD model |
|----------------------------------------------|

|                                                     |
|-----------------------------------------------------|
| Total electronic energy= -592.501729 E <sub>0</sub> |
|-----------------------------------------------------|

|                                                                                          |
|------------------------------------------------------------------------------------------|
| Sum of electronic and zero-point Energies= -592.308362 E <sub>0</sub> + E <sub>ZPE</sub> |
|------------------------------------------------------------------------------------------|

|                                                                                       |
|---------------------------------------------------------------------------------------|
| Sum of electronic and thermal Energies= -592.297142 E <sub>0</sub> + E <sub>tot</sub> |
|---------------------------------------------------------------------------------------|

|                                                                                          |
|------------------------------------------------------------------------------------------|
| Sum of electronic and thermal Enthalpies= -592.296198 E <sub>0</sub> + H <sub>corr</sub> |
|------------------------------------------------------------------------------------------|

|                                                                                             |
|---------------------------------------------------------------------------------------------|
| Sum of electronic and thermal Free Energies= -592.341132 E <sub>0</sub> + G <sub>corr</sub> |
|---------------------------------------------------------------------------------------------|

|                                                      |
|------------------------------------------------------|
| Zero-point correction ( <i>unscaled</i> ) = 0.193367 |
|------------------------------------------------------|

|                                                 |
|-------------------------------------------------|
| Number of imaginary vibrational frequencies = 0 |
|-------------------------------------------------|

## Me<sub>2</sub>S

Charge 0; multiplicity 1

S -1.99520000 2.60720400 0.00558000  
C -2.71513100 1.39651600 1.13883200  
C -2.64550900 1.94385200 -1.54533500  
H -2.40559200 1.66979300 2.16225700  
H -3.81838400 1.41299000 1.08379700  
H -2.34729800 0.37923600 0.91454800  
H -2.28715400 2.59207300 -2.36343800  
H -3.75026200 1.94927600 -1.54358100  
H -2.27938200 0.91602600 -1.71828600

|                                                                                             |
|---------------------------------------------------------------------------------------------|
| DFT M11; cc-pvdz+d, solvent EtOAc, SMD model                                                |
| Total electronic energy= -477.940106 E <sub>0</sub>                                         |
| Sum of electronic and zero-point Energies= -477.865010 E <sub>0</sub> + E <sub>ZPE</sub>    |
| Sum of electronic and thermal Energies= -477.860128 E <sub>0</sub> + E <sub>tot</sub>       |
| Sum of electronic and thermal Enthalpies= -477.859184 E <sub>0</sub> + H <sub>corr</sub>    |
| Sum of electronic and thermal Free Energies= -477.886806 E <sub>0</sub> + G <sub>corr</sub> |
| Zero-point correction ( <i>unscaled</i> ) = 0.075096                                        |
| Number of imaginary vibrational frequencies = 0                                             |

### 8.3 Calculations of competitive formation of *cis*- and *trans*- nitrocyclopropanes 1c in TFE

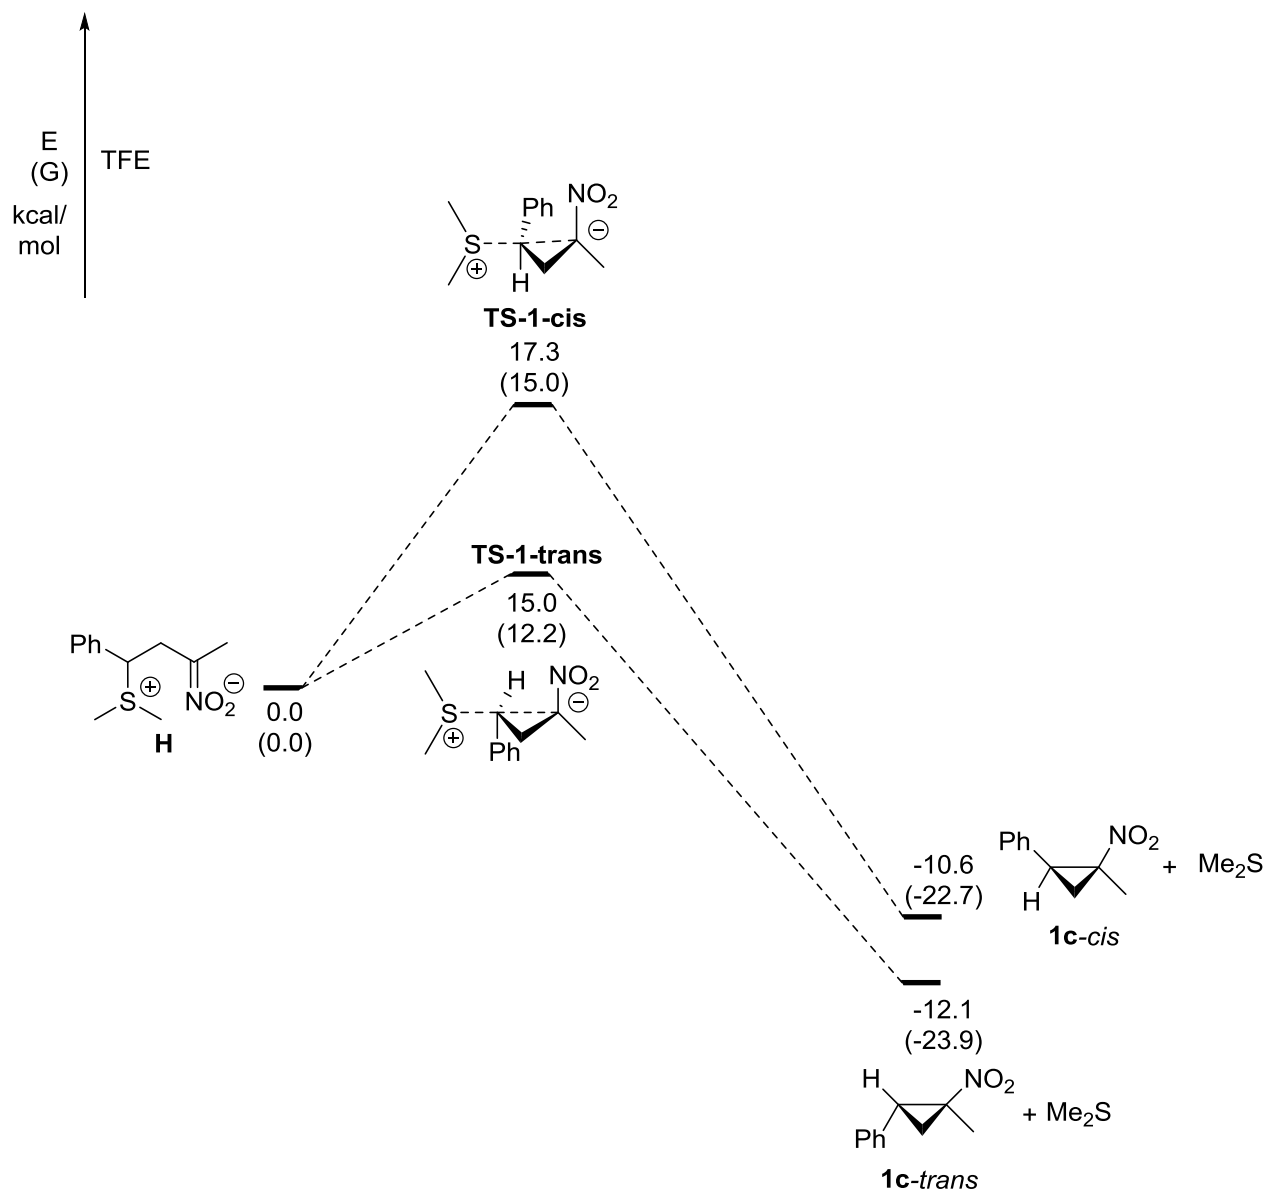

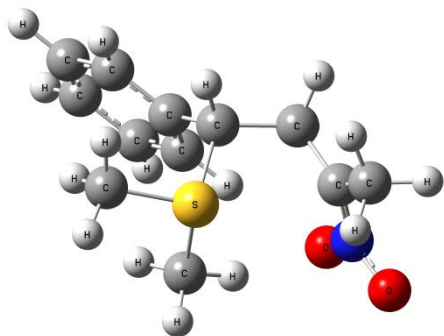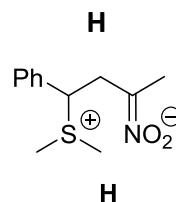

Charge 0; multiplicity 1

C -2.25561700 5.70532200 -1.92277600  
 C -1.57941400 4.44901400 -1.47048800  
 C -2.26492700 3.11864900 -1.41920200  
 C -3.06231700 2.79997200 -0.11486500  
 N -0.29705500 4.52605600 -1.15928500  
 O 0.32338500 5.64131900 -1.24530300  
 O 0.36338500 3.49419500 -0.73543200  
 S -2.82192300 4.18208300 1.09355600  
 H -4.14819200 2.89761300 -0.29990200  
 C -3.97041100 3.73083400 2.39655400  
 C -1.25062200 3.86778600 1.89734800  
 H -2.11994100 6.51867600 -1.18363700  
 H -1.83459000 6.07449500 -2.87964200  
 H -3.33682700 5.52981500 -2.06220700  
 H -1.51704600 2.32652000 -1.57239300  
 H -4.99140300 3.79068900 1.98329400  
 H -3.84689100 4.48060800 3.19634600  
 H -3.74185700 2.71893600 2.77055500  
 H -0.47478100 3.76499900 1.11331300  
 H -1.05212900 4.74803000 2.53238200  
 H -1.32953000 2.95262800 2.50740300  
 H -2.99238100 3.05983300 -2.24777200  
 C -2.78532800 1.45056700 0.50204100  
 C -1.47444100 0.96242300 0.59612400  
 C -3.84658300 0.67585500 0.98497400  
 C -1.23473500 -0.28373100 1.17356600  
 H -0.64318900 1.57121600 0.21092300  
 C -3.60376800 -0.57338900 1.55729300  
 H -4.87439400 1.05591000 0.90185400  
 C -2.29717100 -1.05338300 1.65358200  
 H -0.20674900 -0.66035500 1.24489300  
 H -4.44248000 -1.17682700 1.92625700  
 H -2.10480900 -2.03640500 2.10171700

DFT M11; cc-pvdz+d, solvent TFE, SMD model

Total electronic energy= -1070.418027 E<sub>0</sub>

Sum of electronic and zero-point Energies= -1070.146737 E<sub>0</sub> + E<sub>ZPE</sub>

Sum of electronic and thermal Energies= -1070.130174 E<sub>0</sub> + E<sub>tot</sub>

Sum of electronic and thermal Enthalpies= -1070.129228 E<sub>0</sub> + H<sub>corr</sub>

Sum of electronic and thermal Free Energies= -1070.185002 E<sub>0</sub> + G<sub>corr</sub>

Zero-point correction (*unscaled*) = 0.271290

Number of imaginary vibrational frequencies = 0

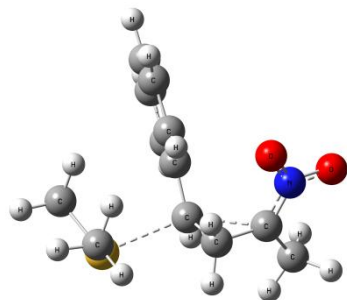

TS-1-cis

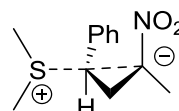

TS-1-cis

Charge 0; multiplicity 1

C 5.03844600 4.26095100 7.10672800  
 C 6.39440700 3.78430100 6.69304100  
 H 7.19836200 4.42277700 7.10527100  
 H 6.47299600 3.78061900 5.59205000  
 H 6.58016900 2.75536000 7.05939100  
 C 3.94161500 4.59334300 6.13765900  
 H 2.94202400 4.53559500 6.59015700  
 H 4.00899100 3.99521800 5.21417900  
 C 4.47988400 5.96570600 5.97944500  
 H 5.44515400 6.02289100 5.45555800  
 C 4.21071300 7.08152700 6.89685800  
 C 3.02877500 7.17564800 7.64908700  
 H 2.29082500 6.36775700 7.61899700  
 C 2.78837100 8.30688300 8.42975100  
 H 1.86170100 8.37650500 9.01257300  
 C 3.71999700 9.34436100 8.47139900  
 H 3.52523700 10.23086900 9.08821700  
 C 4.90060800 9.25733900 7.72664900  
 H 5.63388800 10.07255400 7.75785100  
 C 5.14080400 8.13562600 6.94127700  
 H 6.05866400 8.06400600 6.34126600  
 N 4.78763100 4.35419400 8.43084700  
 O 3.64972900 4.69271400 8.86125100  
 O 5.71354300 4.08616400 9.24850700  
 S 3.34999200 6.76268900 3.99745400  
 C 3.13472500 8.52197900 4.31197200  
 H 2.40986800 8.93054900 3.58647700  
 H 2.77332000 8.68202200 5.34435600  
 H 4.11192500 9.01402400 4.17094200  
 C 1.70144000 6.18127800 4.42677800  
 H 1.67508200 5.08952500 4.27269500  
 H 1.47399600 6.42328600 5.48020900  
 H 0.96269200 6.66094300 3.76164600

DFT M11; cc-pvdz+d, solvent TFE, SMD model

Total electronic energy= -1070.390431 E<sub>0</sub>

Sum of electronic and zero-point Energies= -1070.121986 E<sub>0</sub> + E<sub>ZPE</sub>

Sum of electronic and thermal Energies= -1070.105015 E<sub>0</sub> + E<sub>tot</sub>

Sum of electronic and thermal Enthalpies= -1070.104071 E<sub>0</sub> + H<sub>corr</sub>

Sum of electronic and thermal Free Energies= -1070.161062 E<sub>0</sub> + G<sub>corr</sub>

Zero-point correction (*unscaled*) = 0.268445

Number of imaginary vibrational frequencies = 1; 542i

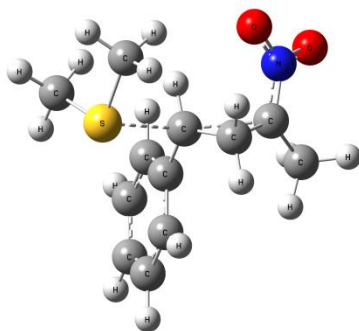

**TS-1-trans**

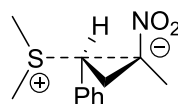

**TS-1-trans**

Charge 0; multiplicity 1

C 1.94338800 -0.13753500 -0.45189000  
 C 3.21574600 -0.68338500 0.10740000  
 N 1.18594800 -0.95875200 -1.22004600  
 C 1.44457800 1.26656800 -0.26840700  
 O 0.09701000 -0.54825300 -1.71873600  
 O 1.56699300 -2.14114300 -1.42422600  
 C 0.59255000 0.73286200 0.81514200  
 S -1.02324600 2.37636800 1.27210600  
 C -2.11164200 1.27768400 2.19351800  
 C -1.78370400 2.26740900 -0.35681200  
 H 3.03427800 -1.58114800 0.72973900  
 H 3.90564400 -0.98280300 -0.70546200  
 H 3.71482500 0.08238500 0.72474800  
 H 0.89367700 1.64759300 -1.14064800  
 H -1.72029200 1.20196400 3.22225200  
 H -3.12933600 1.70356700 2.21818700  
 H -2.13013200 0.27897700 1.71890900  
 H -1.30434500 3.02142600 -1.00351200  
 H -2.86120300 2.49036100 -0.27503300  
 H -1.63153400 1.25614300 -0.78039700  
 H 2.23640300 1.95258800 0.06507000  
 C 1.12184700 0.49056600 2.18038700  
 C 0.70971300 -0.65561800 2.87283100  
 C 2.01469900 1.38347600 2.78929100  
 C 1.19316900 -0.91316400 4.15550400  
 H 0.01291700 -1.35449000 2.39001300  
 C 2.49210000 1.12642100 4.07209800  
 H 2.32707400 2.29384600 2.26030900  
 C 2.08436700 -0.02257000 4.75577300  
 H 0.87245900 -1.81638000 4.68920300  
 H 3.18774100 1.83004600 4.54594900  
 H 2.46404500 -0.22281700 5.76562600  
 H -0.23042600 0.07923500 0.48763900

DFT M11; cc-pvdz+d, solvent TFE, SMD model

Total electronic energy= -1070.3941689 E<sub>0</sub>

Sum of electronic and zero-point Energies= -1070.125660 E<sub>0</sub> + E<sub>ZPE</sub>

Sum of electronic and thermal Energies= -1070.108585 E<sub>0</sub> + E<sub>tot</sub>

Sum of electronic and thermal Enthalpies= -1070.107640 E<sub>0</sub> + H<sub>corr</sub>

Sum of electronic and thermal Free Energies= -1070.16530 E<sub>0</sub> + G<sub>corr</sub>

Zero-point correction (*unscaled*) = 0.268509

Number of imaginary vibrational frequencies = 1; 607i

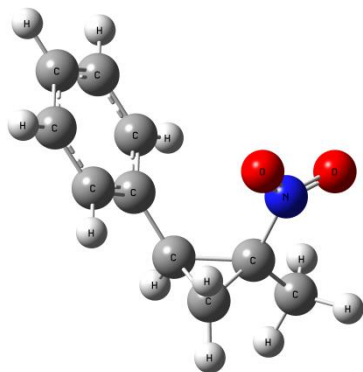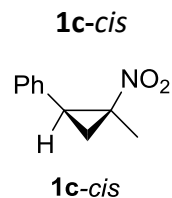

Charge 0; multiplicity 1

C 1.23221200 -1.90372400 0.44295300  
 C 2.32837900 -2.63422300 -0.28045600  
 H 3.24614300 -2.02462100 -0.33264400  
 H 1.98583300 -2.85201600 -1.30580200  
 H 2.56259900 -3.58783000 0.22448200  
 C -0.22934500 -2.11920500 0.15442800  
 H -0.89859500 -2.08789500 1.02140000  
 H -0.45422000 -2.86940200 -0.61152100  
 C 0.40589600 -0.82869600 -0.25962300  
 H 0.69585200 -0.74407900 -1.31631800  
 C 0.07403700 0.47566400 0.40056200  
 C -1.22804400 0.76389200 0.81851300  
 H -2.01797300 0.01300400 0.68365500  
 C -1.52533900 1.99574600 1.40367500  
 H -2.55167000 2.21183100 1.72660500  
 C -0.52082000 2.94843700 1.58053100  
 H -0.75389000 3.91558900 2.04357000  
 C 0.78306000 2.66490800 1.16787300  
 H 1.57846100 3.40808600 1.30688000  
 C 1.07804900 1.43546400 0.57944300  
 H 2.10436000 1.21032600 0.25727400  
 N 1.55607400 -1.59947200 1.84943600  
 O 0.67149600 -1.21103100 2.59012100  
 O 2.71734900 -1.72859700 2.19521600

|                                                                                             |
|---------------------------------------------------------------------------------------------|
| DFT M11; cc-pvdz+d, solvent TFE, SMD model                                                  |
| Total electronic energy= -592.495059 E <sub>0</sub>                                         |
| Sum of electronic and zero-point Energies= -592.302073 E <sub>0</sub> + E <sub>ZPE</sub>    |
| Sum of electronic and thermal Energies= -592.290818 E <sub>0</sub> + E <sub>tot</sub>       |
| Sum of electronic and thermal Enthalpies= -592.289874 E <sub>0</sub> + H <sub>corr</sub>    |
| Sum of electronic and thermal Free Energies= -592.334735 E <sub>0</sub> + G <sub>corr</sub> |
| Zero-point correction ( <i>unscaled</i> ) = 0.192986                                        |
| Number of imaginary vibrational frequencies = 0                                             |



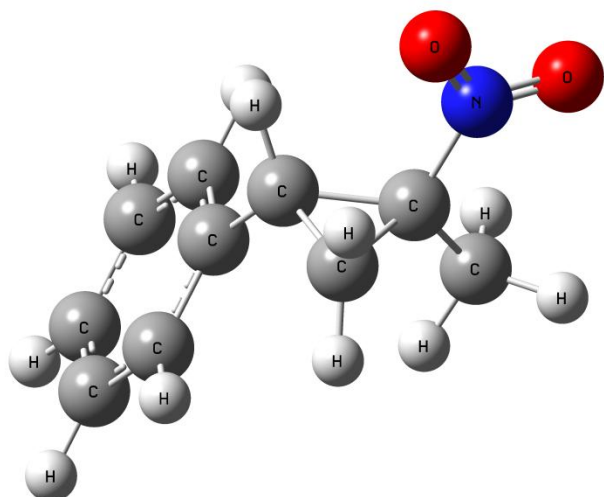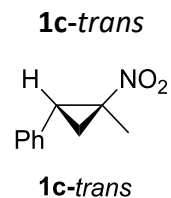

Charge 0; multiplicity 1

C 1.11665700 -0.72517400 -1.46998000  
 C 2.47532600 -1.24215100 -1.09671400  
 N 0.47913900 -1.46314900 -2.57716400  
 C 0.74890800 0.73583500 -1.40699200  
 O -0.61194900 -1.09169100 -2.97502400  
 O 1.07718000 -2.41689500 -3.03914900  
 C 0.11668400 -0.21361200 -0.44040500  
 H 2.41819400 -2.28541600 -0.73917200  
 H 3.15891100 -1.19916500 -1.96195700  
 H 2.88476800 -0.61195100 -0.28976500  
 H 0.12410900 1.12156100 -2.21912500  
 H 1.55305900 1.39192000 -1.05270600  
 C 0.50234000 -0.27073400 1.00536400  
 C 0.35867700 -1.47662800 1.70504600  
 C 1.00349900 0.84893500 1.67524900  
 C 0.71370500 -1.56074400 3.05021800  
 H -0.03539600 -2.35920100 1.18253500  
 C 1.35839700 0.76593500 3.02371200  
 H 1.11103900 1.80107200 1.13942600  
 C 1.21665300 -0.43821800 3.71322000  
 H 0.59873600 -2.51123300 3.58654800  
 H 1.74807300 1.65291000 3.53918500  
 H 1.49694300 -0.50368300 4.77211000  
 H -0.91841300 -0.49948300 -0.66856700

|                                                                                             |
|---------------------------------------------------------------------------------------------|
| DFT M11; cc-pvdz+d, solvent TFE, SMD model                                                  |
| Total electronic energy= -592.497399 E <sub>0</sub>                                         |
| Sum of electronic and zero-point Energies= -592.304158 E <sub>0</sub> + E <sub>ZPE</sub>    |
| Sum of electronic and thermal Energies= -592.292975 E <sub>0</sub> + E <sub>tot</sub>       |
| Sum of electronic and thermal Enthalpies= -592.292031 E <sub>0</sub> + H <sub>corr</sub>    |
| Sum of electronic and thermal Free Energies= -592.336584 E <sub>0</sub> + G <sub>corr</sub> |
| Zero-point correction ( <i>unscaled</i> ) = 0.193241                                        |
| Number of imaginary vibrational frequencies = 0                                             |

## Me<sub>2</sub>S

Charge 0; multiplicity 1

S -2.63823800 2.20471200 1.26977200  
C -3.37823000 0.76629900 2.07787100  
H -3.83940600 1.05109900 3.04051900  
H -4.16221500 0.37106200 1.40904000  
H -2.62200000 -0.02110500 2.24700200  
C -1.43128000 2.63734800 2.54469300  
H -0.71499200 1.81141200 2.70352700  
H -0.87912300 3.52741500 2.19689500  
H -1.93634000 2.87929400 3.49696700

|                                                                                             |
|---------------------------------------------------------------------------------------------|
| DFT M11; cc-pvdz+d, solvent TFE, SMD model                                                  |
| Total electronic energy= -477.939926 E <sub>0</sub>                                         |
| Sum of electronic and zero-point Energies= -477.864936 E <sub>0</sub> + E <sub>ZPE</sub>    |
| Sum of electronic and thermal Energies= -477.860021 E <sub>0</sub> + E <sub>tot</sub>       |
| Sum of electronic and thermal Enthalpies= -477.859077 E <sub>0</sub> + H <sub>corr</sub>    |
| Sum of electronic and thermal Free Energies= -477.886519 E <sub>0</sub> + G <sub>corr</sub> |
| Zero-point correction ( <i>unscaled</i> ) = 0.074990                                        |
| Number of imaginary vibrational frequencies = 0                                             |

## 8.4 Calculations of competitive formation of *trans*-cyclopropane **1c-trans** and *N*-oxide **2c** in EtOAc

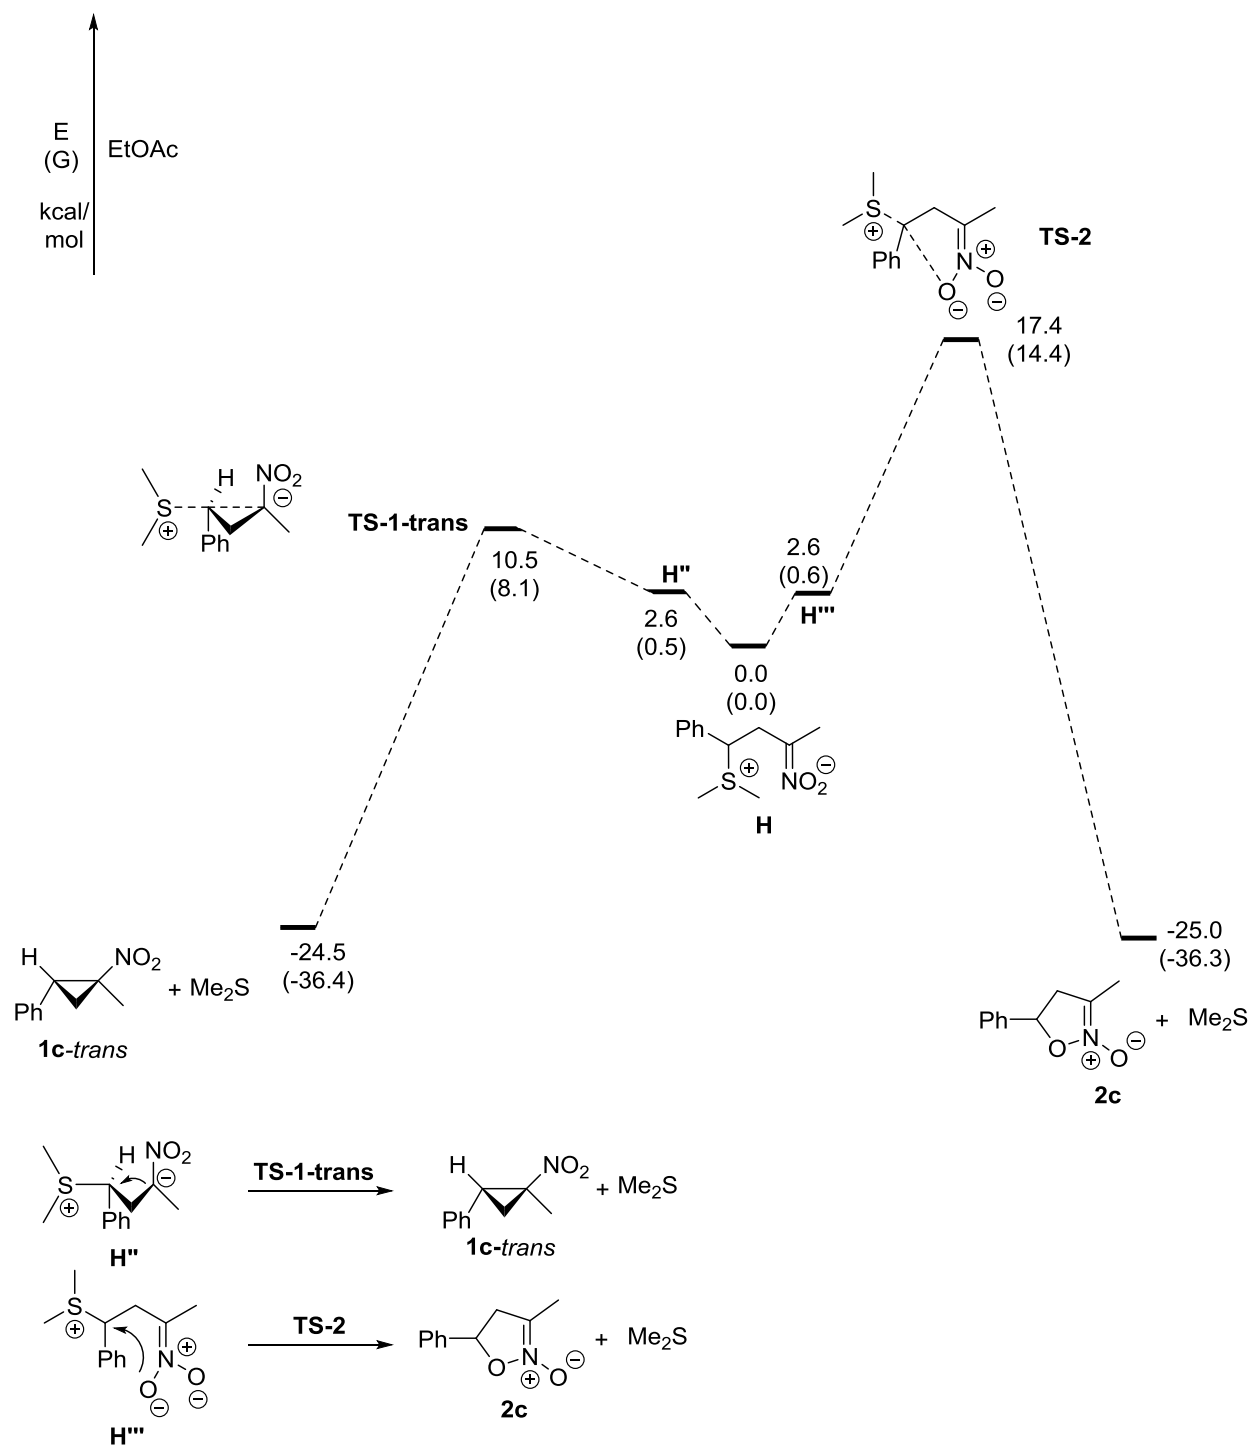

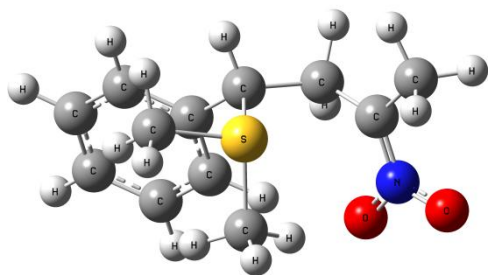

Charge 0; multiplicity 1

C -2.18092600 5.73422300 -1.92447400  
 C -1.59435500 4.44825700 -1.43128200  
 C -2.32640800 3.14301500 -1.42783500  
 C -3.10640500 2.78729000 -0.11829700  
 N -0.29908200 4.46226800 -1.10075700  
 O 0.36490000 5.52876400 -1.18597500  
 O 0.26912200 3.39268600 -0.65389900  
 S -2.86253700 4.18308000 1.07429800  
 H -4.19800300 2.86088200 -0.28381000  
 C -3.99990300 3.72282900 2.38975400  
 C -1.28509900 3.88007600 1.87218900  
 H -2.01377700 6.55395100 -1.19840300  
 H -1.71608800 6.06815600 -2.87500300  
 H -3.26847600 5.62547500 -2.08949700  
 H -1.60902900 2.33041700 -1.62360700  
 H -5.02743100 3.79419200 1.99449100  
 H -3.86421800 4.46049000 3.19873600  
 H -3.77800700 2.70472500 2.75103800  
 H -0.52389100 3.69577700 1.08058100  
 H -1.04939500 4.79509800 2.44164000  
 H -1.38059000 3.01077700 2.54395100  
 H -3.07208800 3.14036100 -2.24292700  
 C -2.79442800 1.44631100 0.50063500  
 C -1.47376400 0.97913200 0.56065200  
 C -3.83060200 0.65820100 1.01595200  
 C -1.20261000 -0.25962100 1.14100500  
 H -0.66860600 1.60332800 0.14241000  
 C -3.55512400 -0.58264700 1.59138400  
 H -4.86674400 1.01979800 0.95386900  
 C -2.23900400 -1.04116300 1.65675400  
 H -0.16798800 -0.62190100 1.18576000  
 H -4.37452400 -1.19671200 1.98504800  
 H -2.01965700 -2.01756000 2.10669100

DFT M11; cc-pvdz+d, solvent EtOAc, SMD model

Total electronic energy= -1070.402777 E<sub>0</sub>

Sum of electronic and zero-point Energies= -1070.131560 E<sub>0</sub> + E<sub>ZPE</sub>

Sum of electronic and thermal Energies= -1070.115083 E<sub>0</sub> + E<sub>tot</sub>

Sum of electronic and thermal Enthalpies= -1070.114138 E<sub>0</sub> + H<sub>corr</sub>

Sum of electronic and thermal Free Energies= -1070.169911 E<sub>0</sub> + G<sub>corr</sub>

Zero-point correction (*unscaled*) = 0.271217

Number of imaginary vibrational frequencies = 0

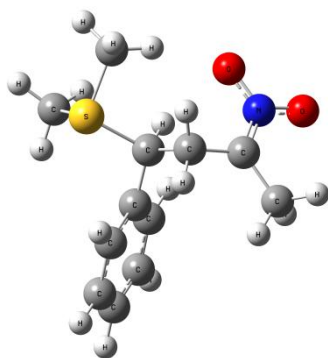

Pre-reaction conformation H''

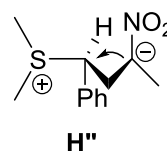

Charge 0; multiplicity 1

C 1.19949900 -0.64184300 -1.72616900  
 C 2.51994800 -1.24821900 -1.37367000  
 N 0.32816400 -1.39714300 -2.39773200  
 C 0.69529300 0.68065000 -1.24078200  
 O -0.85818000 -0.94867800 -2.63736200  
 O 0.65248800 -2.55371400 -2.78718500  
 C -0.34141300 0.39879200 -0.13238200  
 S -1.54887500 1.79190500 -0.00078900  
 C -2.81265500 1.01810700 1.01493600  
 C -2.30022200 1.70162300 -1.64320800  
 H 2.39230700 -2.20639000 -0.82898200  
 H 3.12110100 -1.49045700 -2.27362200  
 H 3.10635300 -0.55900500 -0.73943800  
 H 0.21421800 1.23257500 -2.07127300  
 H -2.39708600 0.90311300 2.02996600  
 H -3.68304800 1.69438400 1.03783000  
 H -3.07671300 0.03956400 0.57820100  
 H -1.91866900 2.55032800 -2.23308900  
 H -3.39110500 1.79450400 -1.51513300  
 H -2.00276600 0.73327500 -2.09697100  
 H 1.51776700 1.29766200 -0.83757100  
 C 0.25227700 0.12567100 1.22679300  
 C 0.10605000 -1.14404600 1.79295800  
 C 0.97388500 1.10911300 1.91573900  
 C 0.67890600 -1.43151500 3.03288900  
 H -0.45265200 -1.91547100 1.24591200  
 C 1.53621700 0.82448900 3.15870400  
 H 1.10106600 2.10800900 1.47405800  
 C 1.39065800 -0.44715500 3.71824800  
 H 0.56737100 -2.43349300 3.46520600  
 H 2.09776500 1.60031300 3.69363200  
 H 1.83875300 -0.67151100 4.69415200  
 H -0.97611900 -0.43751700 -0.47716100

DFT M11; cc-pvdz+d, solvent EtOAc, SMD model

Total electronic energy= -1070.398590 E<sub>0</sub>

Sum of electronic and zero-point Energies= -1070.128273 E<sub>0</sub> + E<sub>ZPE</sub>

Sum of electronic and thermal Energies= -1070.111141 E<sub>0</sub> + E<sub>tot</sub>

Sum of electronic and thermal Enthalpies= -1070.110197 E<sub>0</sub> + H<sub>corr</sub>

Sum of electronic and thermal Free Energies= -1070.169161 E<sub>0</sub> + G<sub>corr</sub>

Zero-point correction (*unscaled*) = 0.270318

Number of imaginary vibrational frequencies = 0

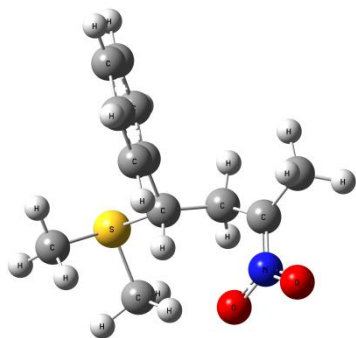

Pre-reaction conformation H'''

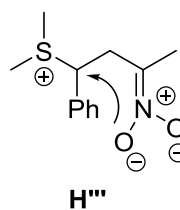

Charge 0; multiplicity 1

C -0.99052900 -1.79295400 -0.94686400  
 C -0.16690300 -2.19622000 -2.12780100  
 N -1.10288700 -2.66231900 0.05908800  
 C -1.56536100 -0.43154100 -0.71489500  
 O -1.72598700 -2.31910700 1.13597100  
 O -0.59120800 -3.81338500 -0.03063200  
 C -0.69288900 0.26584100 0.35095700  
 S -1.67756400 1.54240100 1.25257600  
 H 0.84929000 -2.51823800 -1.82045900  
 H -0.60633000 -3.05957100 -2.66802500  
 H -0.06949200 -1.35538700 -2.83822800  
 H -2.60670400 -0.51486800 -0.34744700  
 H -1.56719000 0.16383800 -1.64510700  
 C 0.56787100 0.89570500 -0.18549500  
 C 1.80714100 0.37114400 0.19310600  
 C 0.51889000 1.97264700 -1.08007000  
 C 2.98666300 0.91410300 -0.31892800  
 H 1.84124500 -0.47972800 0.88696100  
 C 1.69753100 2.52121400 -1.58206700  
 H -0.45201700 2.38434000 -1.39140200  
 C 2.93329700 1.99165500 -1.20277500  
 H 3.95442500 0.49049800 -0.02348700  
 H 1.65198400 3.36636700 -2.27994000  
 H 3.86012600 2.42134100 -1.60251500  
 C -2.91252100 0.48136000 2.03838500  
 H -2.99836500 0.79522600 3.09159300  
 H -3.87067300 0.64398400 1.51942300  
 H -2.57167400 -0.56952400 1.93045100  
 C -0.56772300 1.89037000 2.62134100  
 H -0.27137900 0.93986800 3.09704100  
 H 0.30718100 2.41977000 2.20799600  
 H -1.10331500 2.54348100 3.32976100  
 H -0.47481100 -0.47473100 1.14169600

DFT M11; cc-pvdz+d, solvent EtOAc, SMD model

Total electronic energy= -1070.398619 E<sub>0</sub>

Sum of electronic and zero-point Energies= -1070.128245 E<sub>0</sub> + E<sub>ZPE</sub>

Sum of electronic and thermal Energies= -1070.111148 E<sub>0</sub> + E<sub>tot</sub>

Sum of electronic and thermal Enthalpies= -1070.110204 E<sub>0</sub> + H<sub>corr</sub>

Sum of electronic and thermal Free Energies= -1070.168902 E<sub>0</sub> + G<sub>corr</sub>

Zero-point correction (*unscaled*) = 0.270374

Number of imaginary vibrational frequencies = 0



**TS-1-trans**

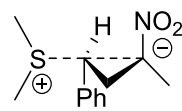

**TS-1-trans**

Charge 0; multiplicity 1

C 1.91861100 -0.13801500 -0.46804100  
 C 3.17783300 -0.73862800 0.06361900  
 N 1.10235100 -0.92717400 -1.22303600  
 C 1.44596600 1.26307300 -0.22872700  
 O 0.00952700 -0.45797000 -1.65848300  
 O 1.44114400 -2.10683700 -1.46028600  
 C 0.55572800 0.78427500 0.86137000  
 S -0.99289000 2.35614600 1.24137700  
 C -2.10975800 1.28732700 2.16258100  
 C -1.71256900 2.21952200 -0.40580200  
 H 2.97476900 -1.66339800 0.63845100  
 H 3.87108200 -1.02002800 -0.75400800  
 H 3.69272400 -0.01836800 0.72347200  
 H 0.90810900 1.68336500 -1.09290300  
 H -1.72337300 1.20657200 3.19269700  
 H -3.11645000 1.73813000 2.18018100  
 H -2.14765600 0.28879400 1.68909400  
 H -1.29372000 3.03132900 -1.02367700  
 H -2.80588400 2.34660100 -0.33381800  
 H -1.45149900 1.23575800 -0.84557900  
 H 2.25088600 1.92911500 0.11806600  
 C 1.10517900 0.52388100 2.22152200  
 C 0.76227500 -0.66168800 2.88352700  
 C 1.95425300 1.44326500 2.85198000  
 C 1.26921800 -0.93050100 4.15479000  
 H 0.10468900 -1.38561000 2.38291000  
 C 2.45582200 1.17610100 4.12379300  
 H 2.21608800 2.38192700 2.34511400  
 C 2.11575500 -0.01168800 4.77620600  
 H 1.00347200 -1.86601800 4.66219300  
 H 3.11821900 1.90134500 4.61223400  
 H 2.51459000 -0.22132600 5.77650400  
 H -0.22918200 0.09215000 0.51920700

|                                                                                              |
|----------------------------------------------------------------------------------------------|
| DFT M11; cc-pvdz+d, solvent EtOAc, SMD model                                                 |
| Total electronic energy= -1070.385997 E <sub>0</sub>                                         |
| Sum of electronic and zero-point Energies= -1070.117206 E <sub>0</sub> + E <sub>ZPE</sub>    |
| Sum of electronic and thermal Energies= -1070.100243 E <sub>0</sub> + E <sub>tot</sub>       |
| Sum of electronic and thermal Enthalpies= -1070.099299 E <sub>0</sub> + H <sub>corr</sub>    |
| Sum of electronic and thermal Free Energies= -1070.157059 E <sub>0</sub> + G <sub>corr</sub> |
| Zero-point correction ( <i>unscaled</i> ) = 0.268791                                         |
| Number of imaginary vibrational frequencies = 1; 519i                                        |

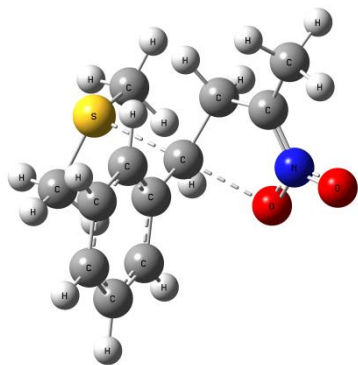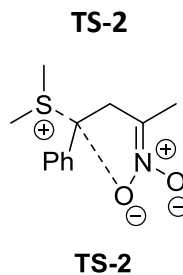

Charge 0; multiplicity 1

C 2.07577100 -0.60287400 -0.41668000  
 C 1.72457900 -0.82042800 -1.84855400  
 N 3.04458700 -1.29129300 0.16008800  
 C 1.36056800 0.33502800 0.50864800  
 O 3.26949600 -1.01984100 1.42302800  
 O 3.75314200 -2.15727400 -0.41246600  
 C 2.33961300 0.88212800 1.54340200  
 S 1.20352400 2.73493200 2.12204400  
 H 2.51378100 -1.43656900 -2.30830800  
 H 0.75695900 -1.34832600 -1.97764700  
 H 1.64844900 0.13839600 -2.39864800  
 H 0.53252500 -0.16336100 1.05553500  
 H 0.91308200 1.15496700 -0.08466500  
 C 3.59861300 1.55668900 1.11021800  
 C 4.72218600 1.52372300 1.94503400  
 C 3.66638800 2.23043300 -0.11302600  
 C 5.89528300 2.17053400 1.56709000  
 H 4.67257700 0.95727400 2.88382000  
 C 4.84453700 2.87569300 -0.49273800  
 H 2.78917000 2.26000200 -0.77357200  
 C 5.95758100 2.85026200 0.34712400  
 H 6.77359400 2.13696400 2.22354400  
 H 4.89178000 3.40091800 -1.45455700  
 H 6.88335600 3.35720900 0.04758700  
 C -0.13767300 1.93383000 3.01626900  
 H -0.62173300 2.66709200 3.68321400  
 H -0.87158200 1.57699700 2.27466900  
 H 0.25504200 1.08364800 3.60317000  
 C 2.23997900 3.24303800 3.50017200  
 H 2.56663800 2.35575000 4.07311600  
 H 3.11443700 3.76999400 3.08321500  
 H 1.66962800 3.92922200 4.14882100  
 H 2.27845300 0.54380600 2.58351900

|                                                                                              |
|----------------------------------------------------------------------------------------------|
| DFT M11; cc-pvdz+d, solvent EtOAc, SMD model                                                 |
| Total electronic energy= -1070.375040 E <sub>0</sub>                                         |
| Sum of electronic and zero-point Energies= -1070.106710 E <sub>0</sub> + E <sub>ZPE</sub>    |
| Sum of electronic and thermal Energies= -1070.089574 E <sub>0</sub> + E <sub>tot</sub>       |
| Sum of electronic and thermal Enthalpies= -1070.088630 E <sub>0</sub> + H <sub>corr</sub>    |
| Sum of electronic and thermal Free Energies= -1070.146890 E <sub>0</sub> + G <sub>corr</sub> |
| Zero-point correction ( <i>unscaled</i> ) = 0.268331                                         |
| Number of imaginary vibrational frequencies = 1; 532i                                        |



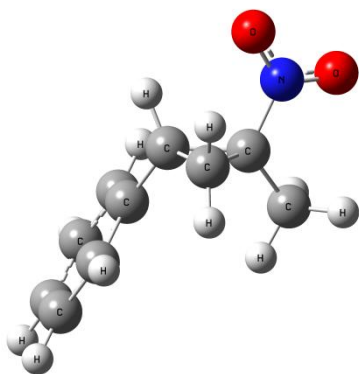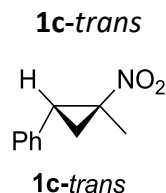

Charge 0; multiplicity 1

C 1.11074400 -0.74011300 -1.46901800  
 C 2.47866400 -1.24810200 -1.11396000  
 N 0.46574000 -1.47417900 -2.58290100  
 C 0.73602300 0.71733500 -1.39067100  
 O -0.63343500 -1.10371800 -2.95690500  
 O 1.07353500 -2.41263000 -3.05987500  
 C 0.12134900 -0.24612200 -0.42379800  
 H 2.43714400 -2.29780400 -0.77509300  
 H 3.15547500 -1.18599500 -1.98285200  
 H 2.88771500 -0.62930000 -0.29800800  
 H 0.09620900 1.10379300 -2.19017200  
 H 1.53543100 1.37991100 -1.03790700  
 C 0.51981500 -0.30260500 1.01898500  
 C 0.41243300 -1.51406300 1.71527100  
 C 0.99706000 0.82596900 1.69112400  
 C 0.77966000 -1.59470500 3.05705800  
 H 0.03659100 -2.40445300 1.19282400  
 C 1.36451400 0.74693500 3.03609700  
 H 1.07447400 1.78260400 1.15830800  
 C 1.25893700 -0.46299300 3.72120000  
 H 0.69245800 -2.54976400 3.59008500  
 H 1.73454000 1.64143300 3.55268600  
 H 1.54862700 -0.52572400 4.77750200  
 H -0.91533300 -0.53062900 -0.64508100

|                                                                                             |
|---------------------------------------------------------------------------------------------|
| DFT M11; cc-pvdz+d, solvent EtOAc, SMD model                                                |
| Total electronic energy= -592.501729 E <sub>0</sub>                                         |
| Sum of electronic and zero-point Energies= -592.308362 E <sub>0</sub> + E <sub>ZPE</sub>    |
| Sum of electronic and thermal Energies= -592.297142 E <sub>0</sub> + E <sub>tot</sub>       |
| Sum of electronic and thermal Enthalpies= -592.296198 E <sub>0</sub> + H <sub>corr</sub>    |
| Sum of electronic and thermal Free Energies= -592.341132 E <sub>0</sub> + G <sub>corr</sub> |
| Zero-point correction ( <i>unscaled</i> ) = 0.193367                                        |
| Number of imaginary vibrational frequencies = 0                                             |

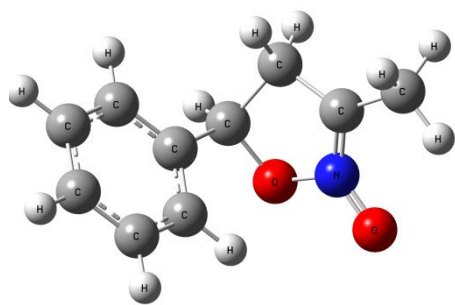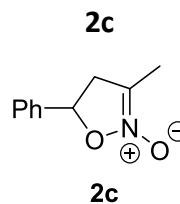

Charge 0; multiplicity 1

C -0.74039700 -1.90276000 -1.30416600  
 C -1.03775700 -2.51260900 -2.62694900  
 N -0.01742700 -2.53651700 -0.42880500  
 C -1.18425500 -0.58344400 -0.75316600  
 O 0.11896300 -1.78525200 0.77997200  
 O 0.54412800 -3.63152100 -0.43284600  
 C -0.19949100 -0.43467500 0.42352400  
 H -0.54890300 -3.49745600 -2.69302000  
 H -2.12800900 -2.63893200 -2.76053400  
 H -0.67071800 -1.86635600 -3.44493900  
 H -2.23818000 -0.62633600 -0.41826700  
 H -1.08060400 0.23510900 -1.48529300  
 C 1.05977700 0.31713200 0.02501500  
 C 2.25956300 -0.35964200 -0.20544900  
 C 1.00822100 1.70587100 -0.13540200  
 C 3.39579300 0.34913100 -0.60243800  
 H 2.30489600 -1.44795000 -0.06871000  
 C 2.14439800 2.41225900 -0.52594300  
 H 0.06555100 2.23971400 0.05094800  
 C 3.34228000 1.73327900 -0.76271400  
 H 4.33425700 -0.18936500 -0.78492100  
 H 2.09643100 3.50202700 -0.64435600  
 H 4.23768100 2.28767800 -1.07021600  
 H -0.66915500 0.02689300 1.30762800

|                                                                                             |
|---------------------------------------------------------------------------------------------|
| DFT M11; cc-pvdz+d, solvent EtOAc, SMD model                                                |
| Total electronic energy= -592.502485 E <sub>0</sub>                                         |
| Sum of electronic and zero-point Energies= -592.308450 E <sub>0</sub> + E <sub>ZPE</sub>    |
| Sum of electronic and thermal Energies= -592.297411 E <sub>0</sub> + E <sub>tot</sub>       |
| Sum of electronic and thermal Enthalpies= -592.296466 E <sub>0</sub> + H <sub>corr</sub>    |
| Sum of electronic and thermal Free Energies= -592.340985 E <sub>0</sub> + G <sub>corr</sub> |
| Zero-point correction ( <i>unscaled</i> ) = 0.194035                                        |
| Number of imaginary vibrational frequencies = 0                                             |

## Me<sub>2</sub>S

Charge 0; multiplicity 1

S -1.99520000 2.60720400 0.00558000  
C -2.71513100 1.39651600 1.13883200  
C -2.64550900 1.94385200 -1.54533500  
H -2.40559200 1.66979300 2.16225700  
H -3.81838400 1.41299000 1.08379700  
H -2.34729800 0.37923600 0.91454800  
H -2.28715400 2.59207300 -2.36343800  
H -3.75026200 1.94927600 -1.54358100  
H -2.27938200 0.91602600 -1.71828600

|                                                                                             |
|---------------------------------------------------------------------------------------------|
| DFT M11; cc-pvdz+d, solvent EtOAc, SMD model                                                |
| Total electronic energy= -477.940106 E <sub>0</sub>                                         |
| Sum of electronic and zero-point Energies= -477.865010 E <sub>0</sub> + E <sub>ZPE</sub>    |
| Sum of electronic and thermal Energies= -477.860128 E <sub>0</sub> + E <sub>tot</sub>       |
| Sum of electronic and thermal Enthalpies= -477.859184 E <sub>0</sub> + H <sub>corr</sub>    |
| Sum of electronic and thermal Free Energies= -477.886806 E <sub>0</sub> + G <sub>corr</sub> |
| Zero-point correction ( <i>unscaled</i> ) = 0.075096                                        |
| Number of imaginary vibrational frequencies = 0                                             |

## 8.5 Calculations of competitive formation of *trans*-cyclopropane **1c-trans** and *N*-oxide **2c** in 2,2,2-trifluoroethanol (TFE)

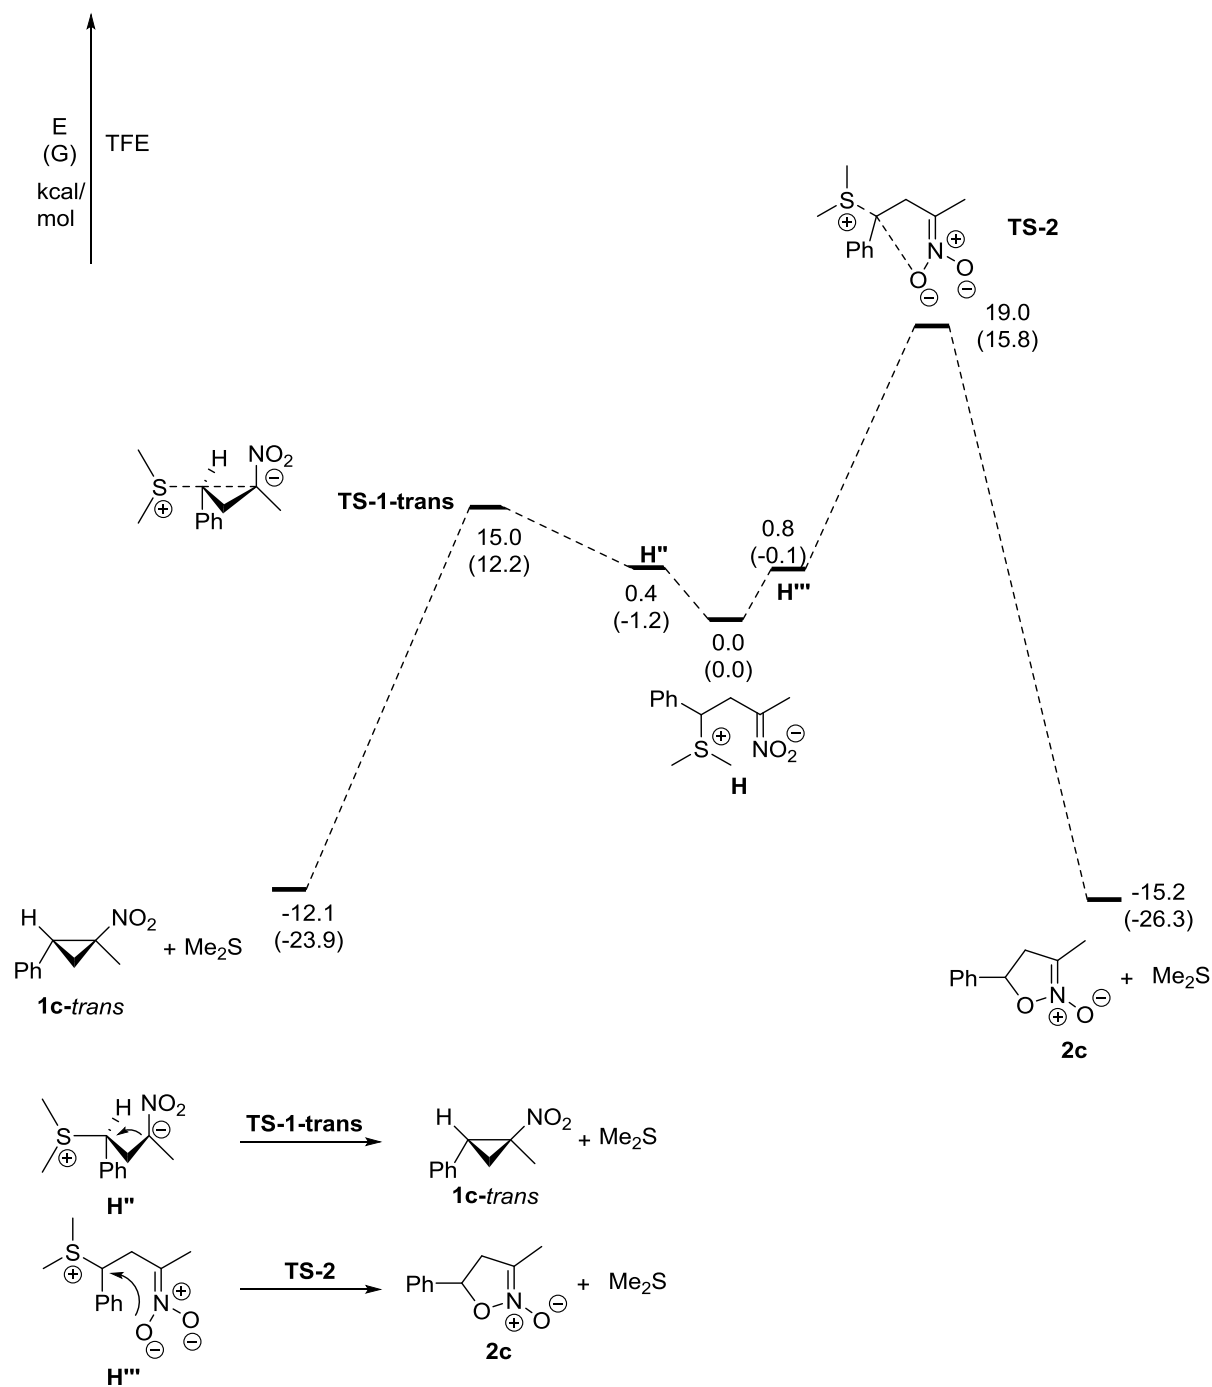



Charge 0; multiplicity 1

C -2.25561700 5.70532200 -1.92277600  
 C -1.57941400 4.44901400 -1.47048800  
 C -2.26492700 3.11864900 -1.41920200  
 C -3.06231700 2.79997200 -0.11486500  
 N -0.29705500 4.52605600 -1.15928500  
 O 0.32338500 5.64131900 -1.24530300  
 O 0.36338500 3.49419500 -0.73543200  
 S -2.82192300 4.18208300 1.09355600  
 H -4.14819200 2.89761300 -0.29990200  
 C -3.97041100 3.73083400 2.39655400  
 C -1.25062200 3.86778600 1.89734800  
 H -2.11994100 6.51867600 -1.18363700  
 H -1.83459000 6.07449500 -2.87964200  
 H -3.33682700 5.52981500 -2.06220700  
 H -1.51704600 2.32652000 -1.57239300  
 H -4.99140300 3.79068900 1.98329400  
 H -3.84689100 4.48060800 3.19634600  
 H -3.74185700 2.71893600 2.77055500  
 H -0.47478100 3.76499900 1.11331300  
 H -1.05212900 4.74803000 2.53238200  
 H -1.32953000 2.95262800 2.50740300  
 H -2.99238100 3.05983300 -2.24777200  
 C -2.78532800 1.45056700 0.50204100  
 C -1.47444100 0.96242300 0.59612400  
 C -3.84658300 0.67585500 0.98497400  
 C -1.23473500 -0.28373100 1.17356600  
 H -0.64318900 1.57121600 0.21092300  
 C -3.60376800 -0.57338900 1.55729300  
 H -4.87439400 1.05591000 0.90185400  
 C -2.29717100 -1.05338300 1.65358200  
 H -0.20674900 -0.66035500 1.24489300  
 H -4.44248000 -1.17682700 1.92625700  
 H -2.10480900 -2.03640500 2.10171700

DFT M11; cc-pvdz+d, solvent TFE, SMD model

Total electronic energy= -1070.418027 E<sub>0</sub>

Sum of electronic and zero-point Energies= -1070.146737 E<sub>0</sub> + E<sub>ZPE</sub>

Sum of electronic and thermal Energies= -1070.130174 E<sub>0</sub> + E<sub>tot</sub>

Sum of electronic and thermal Enthalpies= -1070.129228 E<sub>0</sub> + H<sub>corr</sub>

Sum of electronic and thermal Free Energies= -1070.185002 E<sub>0</sub> + G<sub>corr</sub>

Zero-point correction (*unscaled*) = 0.271290

Number of imaginary vibrational frequencies = 0

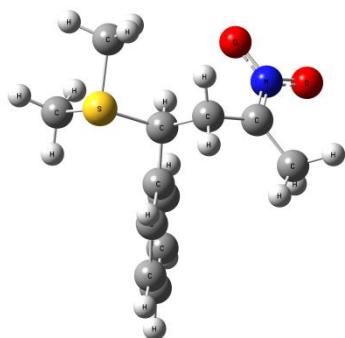

Pre-reaction conformation H''

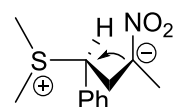

H''

Charge 0; multiplicity 1

C 1.23957400 -0.63425000 -1.63532000  
 C 2.59461900 -1.04926200 -1.15882500  
 N 0.52077400 -1.51315700 -2.30730000  
 C 0.58089000 0.67122200 -1.30676400  
 O -0.68577500 -1.23801300 -2.68540800  
 O 1.00303200 -2.66671200 -2.59586200  
 C -0.44179600 0.40013300 -0.18853700  
 S -1.58629900 1.82899300 0.01710700  
 C -2.83631900 1.09002200 1.07271000  
 C -2.42575300 1.82699300 -1.57440400  
 H 2.53565700 -1.95415700 -0.52009300  
 H 3.26229300 -1.30749000 -2.00470200  
 H 3.06408600 -0.23739100 -0.57669300  
 H 0.06429000 1.06077300 -2.20243200  
 H -2.38548900 0.94860800 2.06910400  
 H -3.67479900 1.80344100 1.13536700  
 H -3.15594600 0.12945500 0.63385000  
 H -1.83341400 2.44223300 -2.27033300  
 H -3.41523900 2.28822200 -1.41827300  
 H -2.51460800 0.78664900 -1.93340400  
 H 1.32908200 1.41073600 -0.97131800  
 C 0.19064800 0.08935100 1.14808500  
 C -0.02652800 -1.16153000 1.73310200  
 C 1.01883300 1.01939700 1.78897100  
 C 0.58515900 -1.48480400 2.94551800  
 H -0.67510100 -1.88860800 1.22573700  
 C 1.62226100 0.69795700 3.00376700  
 H 1.19856200 2.00405700 1.33387300  
 C 1.40808100 -0.55542400 3.58224100  
 H 0.41595200 -2.47103700 3.39543400  
 H 2.26918400 1.43105200 3.50144400  
 H 1.88790900 -0.80844900 4.53600600  
 H -1.10079000 -0.42518400 -0.51616200

DFT M11; cc-pvdz+d, solvent TFE, SMD model

Total electronic energy= -1070.417393 E<sub>0</sub>

Sum of electronic and zero-point Energies= -1070.146820 E<sub>0</sub> + E<sub>ZPE</sub>

Sum of electronic and thermal Energies= -1070.129740 E<sub>0</sub> + E<sub>tot</sub>

Sum of electronic and thermal Enthalpies= -1070.128796 E<sub>0</sub> + H<sub>corr</sub>

Sum of electronic and thermal Free Energies= -1070.186899 E<sub>0</sub> + G<sub>corr</sub>

Zero-point correction (*unscaled*) = 0.270573

Number of imaginary vibrational frequencies = 0

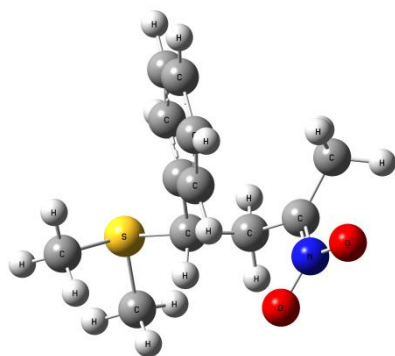

Pre-reaction conformation H'''

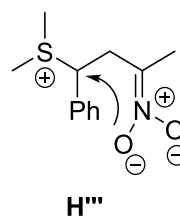

Charge 0; multiplicity 1

C -0.69985700 -1.67966000 -1.01878300  
 C -0.20472400 -1.55849000 -2.42481100  
 N -0.10806600 -2.56201100 -0.24015500  
 C -1.62548100 -0.69091600 -0.37313200  
 O -0.40412600 -2.65179300 1.01621900  
 O 0.80887700 -3.33035700 -0.70444600  
 C -0.82171200 0.18598900 0.61813500  
 S -1.83315100 1.59881000 1.18802900  
 H 0.86984100 -1.27366600 -2.44388400  
 H -0.28258100 -2.52039200 -2.96692600  
 H -0.78033400 -0.79460200 -2.97542700  
 H -2.43120800 -1.20355500 0.18483800  
 H -2.07985300 -0.05746300 -1.15755100  
 C 0.47503500 0.68881100 0.02203600  
 C 1.64498100 -0.02002300 0.31961700  
 C 0.51681500 1.74182200 -0.89723800  
 C 2.84860900 0.32941900 -0.29075200  
 H 1.59237800 -0.87582400 1.00835900  
 C 1.72582200 2.09558500 -1.49930200  
 H -0.39911200 2.28980400 -1.16137200  
 C 2.89178500 1.39106500 -1.19757700  
 H 3.76027700 -0.23532200 -0.05881700  
 H 1.75344700 2.92550900 -2.21640400  
 H 3.83981800 1.66740800 -1.67591900  
 C -3.16936900 0.75919400 2.04337400  
 H -3.68740900 1.52002900 2.65072400  
 H -3.85692900 0.35815100 1.28128700  
 H -2.75214700 -0.04226400 2.67634400  
 C -0.84280600 2.18817800 2.56421900  
 H -0.59865200 1.33745300 3.22235200  
 H 0.06747100 2.64349100 2.13949100  
 H -1.43650300 2.95190200 3.09378200  
 H -0.61361100 -0.40925400 1.52358900

|                                                                                              |
|----------------------------------------------------------------------------------------------|
| DFT M11; cc-pvdz+d, solvent TFE, SMD model                                                   |
| Total electronic energy= -1070.416707 E <sub>0</sub>                                         |
| Sum of electronic and zero-point Energies= -1070.146028 E <sub>0</sub> + E <sub>ZPE</sub>    |
| Sum of electronic and thermal Energies= -1070.129143 E <sub>0</sub> + E <sub>tot</sub>       |
| Sum of electronic and thermal Enthalpies= -1070.128199 E <sub>0</sub> + H <sub>corr</sub>    |
| Sum of electronic and thermal Free Energies= -1070.185084 E <sub>0</sub> + G <sub>corr</sub> |
| Zero-point correction ( <i>unscaled</i> ) = 0.270680                                         |
| Number of imaginary vibrational frequencies = 0                                              |

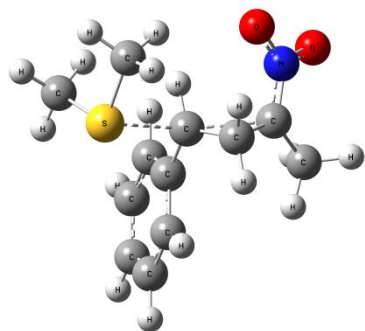

**TS-1-trans**

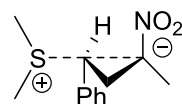

**TS-1-trans**

Charge 0; multiplicity 1

C 1.94338800 -0.13753500 -0.45189000  
 C 3.21574600 -0.68338500 0.10740000  
 N 1.18594800 -0.95875200 -1.22004600  
 C 1.44457800 1.26656800 -0.26840700  
 O 0.09701000 -0.54825300 -1.71873600  
 O 1.56699300 -2.14114300 -1.42422600  
 C 0.59255000 0.73286200 0.81514200  
 S -1.02324600 2.37636800 1.27210600  
 C -2.11164200 1.27768400 2.19351800  
 C -1.78370400 2.26740900 -0.35681200  
 H 3.03427800 -1.58114800 0.72973900  
 H 3.90564400 -0.98280300 -0.70546200  
 H 3.71482500 0.08238500 0.72474800  
 H 0.89367700 1.64759300 -1.14064800  
 H -1.72029200 1.20196400 3.2225200  
 H -3.12933600 1.70356700 2.21818700  
 H -2.13013200 0.27897700 1.71890900  
 H -1.30434500 3.02142600 -1.00351200  
 H -2.86120300 2.49036100 -0.27503300  
 H -1.63153400 1.25614300 -0.78039700  
 H 2.23640300 1.95258800 0.06507000  
 C 1.12184700 0.49056600 2.18038700  
 C 0.70971300 -0.65561800 2.87283100  
 C 2.01469900 1.38347600 2.78929100  
 C 1.19316900 -0.91316400 4.15550400  
 H 0.01291700 -1.35449000 2.39001300  
 C 2.49210000 1.12642100 4.07209800  
 H 2.32707400 2.29384600 2.26030900  
 C 2.08436700 -0.02257000 4.75577300  
 H 0.87245900 -1.81638000 4.68920300  
 H 3.18774100 1.83004600 4.54594900  
 H 2.46404500 -0.22281700 5.76562600  
 H -0.23042600 0.07923500 0.48763900

DFT M11; cc-pvdz+d, solvent TFE, SMD model

Total electronic energy= -1070.3941689 E<sub>0</sub>

Sum of electronic and zero-point Energies= -1070.125660 E<sub>0</sub> + E<sub>ZPE</sub>

Sum of electronic and thermal Energies= -1070.108585 E<sub>0</sub> + E<sub>tot</sub>

Sum of electronic and thermal Enthalpies= -1070.107640 E<sub>0</sub> + H<sub>corr</sub>

Sum of electronic and thermal Free Energies= -1070.16530 E<sub>0</sub> + G<sub>corr</sub>

Zero-point correction (*unscaled*) = 0.268509

Number of imaginary vibrational frequencies = 1; 607i



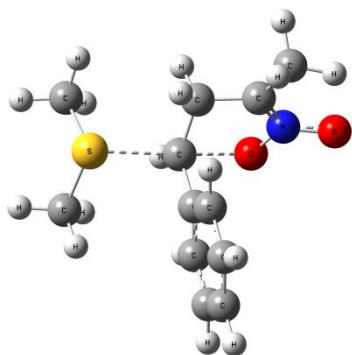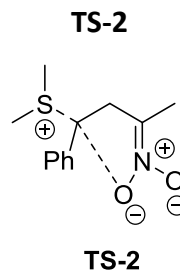

Charge 0; multiplicity 1

C 2.06240800 -0.61056200 -0.43911000  
 C 1.66107900 -0.82893100 -1.85647200  
 N 3.03357500 -1.28641900 0.11712100  
 C 1.38166700 0.34778600 0.49334600  
 O 3.29565500 -1.00813900 1.38058200  
 O 3.75071800 -2.17139000 -0.45314300  
 C 2.38463000 0.84602700 1.52539200  
 S 1.19384900 2.75992700 2.14564900  
 H 2.35930400 -1.53334200 -2.33381700  
 H 0.63682900 -1.24436700 -1.92587900  
 H 1.66878200 0.12412000 -2.41925400  
 H 0.54093500 -0.14038100 1.02529500  
 H 0.96337600 1.18305700 -0.09631600  
 C 3.62490600 1.55316400 1.10353400  
 C 4.71662800 1.60060800 1.98092100  
 C 3.71896100 2.15981800 -0.15362100  
 C 5.88603100 2.25743700 1.60852100  
 H 4.64289400 1.09881500 2.95520400  
 C 4.89338300 2.81659800 -0.52497900  
 H 2.86657100 2.13262300 -0.84603700  
 C 5.97539200 2.86835400 0.35409100  
 H 6.73834500 2.28937300 2.29860400  
 H 4.96167400 3.29226500 -1.51115200  
 H 6.89732600 3.38575800 0.06010000  
 C -0.13524900 1.91426900 3.01833900  
 H -0.61813200 2.61647500 3.71906200  
 H -0.87295700 1.58125000 2.26921900  
 H 0.26853800 1.04447300 3.56835700  
 C 2.22611900 3.23158800 3.54084600  
 H 2.56422300 2.32924800 4.08319600  
 H 3.09362700 3.78577600 3.14491900  
 H 1.64738700 3.88661400 4.21424600  
 H 2.29585200 0.54667300 2.57570500

DFT M11; cc-pvdz+d, solvent TFE, SMD model

Total electronic energy= -1070.387772 E<sub>0</sub>

Sum of electronic and zero-point Energies= -1070.119528 E<sub>0</sub> + E<sub>ZPE</sub>

Sum of electronic and thermal Energies= -1070.102320 E<sub>0</sub> + E<sub>tot</sub>

Sum of electronic and thermal Enthalpies= -1070.101376 E<sub>0</sub> + H<sub>corr</sub>

Sum of electronic and thermal Free Energies= -1070.159791 E<sub>0</sub> + G<sub>corr</sub>

Zero-point correction (*unscaled*) = 0.268243

Number of imaginary vibrational frequencies = 1; 581i

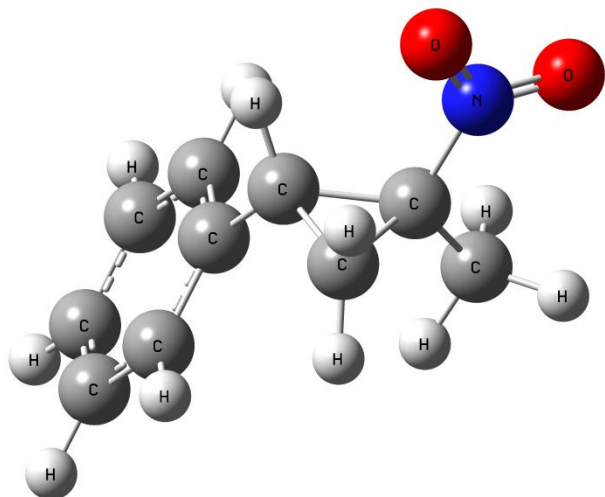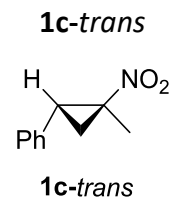

Charge 0; multiplicity 1

C 1.11665700 -0.72517400 -1.46998000  
 C 2.47532600 -1.24215100 -1.09671400  
 N 0.47913900 -1.46314900 -2.57716400  
 C 0.74890800 0.73583500 -1.40699200  
 O -0.61194900 -1.09169100 -2.97502400  
 O 1.07718000 -2.41689500 -3.03914900  
 C 0.11668400 -0.21361200 -0.44040500  
 H 2.41819400 -2.28541600 -0.73917200  
 H 3.15891100 -1.19916500 -1.96195700  
 H 2.88476800 -0.61195100 -0.28976500  
 H 0.12410900 1.12156100 -2.21912500  
 H 1.55305900 1.39192000 -1.05270600  
 C 0.50234000 -0.27073400 1.00536400  
 C 0.35867700 -1.47662800 1.70504600  
 C 1.00349900 0.84893500 1.67524900  
 C 0.71370500 -1.56074400 3.05021800  
 H -0.03539600 -2.35920100 1.18253500  
 C 1.35839700 0.76593500 3.02371200  
 H 1.11103900 1.80107200 1.13942600  
 C 1.21665300 -0.43821800 3.71322000  
 H 0.59873600 -2.51123300 3.58654800  
 H 1.74807300 1.65291000 3.53918500  
 H 1.49694300 -0.50368300 4.77211000  
 H -0.91841300 -0.49948300 -0.66856700

|                                                                                             |
|---------------------------------------------------------------------------------------------|
| DFT M11; cc-pvdz+d, solvent TFE, SMD model                                                  |
| Total electronic energy= -592.497399 E <sub>0</sub>                                         |
| Sum of electronic and zero-point Energies= -592.304158 E <sub>0</sub> + E <sub>ZPE</sub>    |
| Sum of electronic and thermal Energies= -592.292975 E <sub>0</sub> + E <sub>tot</sub>       |
| Sum of electronic and thermal Enthalpies= -592.292031 E <sub>0</sub> + H <sub>corr</sub>    |
| Sum of electronic and thermal Free Energies= -592.336584 E <sub>0</sub> + G <sub>corr</sub> |
| Zero-point correction ( <i>unscaled</i> ) = 0.193241                                        |
| Number of imaginary vibrational frequencies = 0                                             |

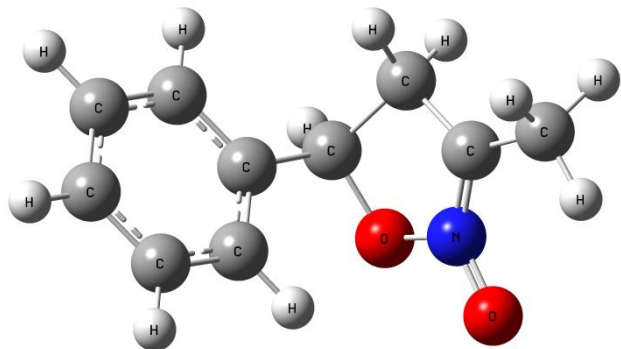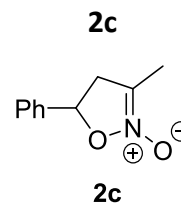

Charge 0; multiplicity 1

C -0.75196800 -1.89939100 -1.29319900  
 C -1.09374400 -2.48157100 -2.61558300  
 N 0.00351900 -2.53679800 -0.45590600  
 C -1.18672500 -0.59578800 -0.69897100  
 O 0.18222700 -1.82020100 0.75461900  
 O 0.58267200 -3.63769000 -0.50028500  
 C -0.16434300 -0.45893400 0.44496600  
 H -0.62031600 -3.47020100 -2.72189800  
 H -2.18967100 -2.58680700 -2.71160400  
 H -0.74581600 -1.81647700 -3.42638100  
 H -2.22705600 -0.66503000 -0.33002800  
 H -1.12028800 0.23521900 -1.42067300  
 C 1.07565800 0.30941300 0.02229400  
 C 2.27345600 -0.35033700 -0.26377500  
 C 1.00516200 1.70102600 -0.10409200  
 C 3.38988200 0.37912900 -0.68039300  
 H 2.33761100 -1.44145900 -0.15777000  
 C 2.12155600 2.42719600 -0.51522900  
 H 0.06352900 2.21968800 0.12493600  
 C 3.31801300 1.76613300 -0.80614100  
 H 4.32673100 -0.14577700 -0.90649700  
 H 2.05901500 3.51890200 -0.60742100  
 H 4.19763000 2.33663900 -1.12984800  
 H -0.60690400 -0.02964500 1.35792100

|                                                                                             |
|---------------------------------------------------------------------------------------------|
| DFT M11; cc-pvdz+d, solvent TFE, SMD model                                                  |
| Total electronic energy= -592.502283 E <sub>0</sub>                                         |
| Sum of electronic and zero-point Energies= -592.308244 E <sub>0</sub> + E <sub>ZPE</sub>    |
| Sum of electronic and thermal Energies= -592.297268 E <sub>0</sub> + E <sub>tot</sub>       |
| Sum of electronic and thermal Enthalpies= -592.296324 E <sub>0</sub> + H <sub>corr</sub>    |
| Sum of electronic and thermal Free Energies= -592.340326 E <sub>0</sub> + G <sub>corr</sub> |
| Zero-point correction ( <i>unscaled</i> ) = 0.194039                                        |
| Number of imaginary vibrational frequencies = 0                                             |

## Me<sub>2</sub>S

Charge 0; multiplicity 1

S -2.63823800 2.20471200 1.26977200  
C -3.37823000 0.76629900 2.07787100  
H -3.83940600 1.05109900 3.04051900  
H -4.16221500 0.37106200 1.40904000  
H -2.62200000 -0.02110500 2.24700200  
C -1.43128000 2.63734800 2.54469300  
H -0.71499200 1.81141200 2.70352700  
H -0.87912300 3.52741500 2.19689500  
H -1.93634000 2.87929400 3.49696700

|                                                                                             |
|---------------------------------------------------------------------------------------------|
| DFT M11; cc-pvdz+d, solvent TFE, SMD model                                                  |
| Total electronic energy= -477.939926 E <sub>0</sub>                                         |
| Sum of electronic and zero-point Energies= -477.864936 E <sub>0</sub> + E <sub>ZPE</sub>    |
| Sum of electronic and thermal Energies= -477.860021 E <sub>0</sub> + E <sub>tot</sub>       |
| Sum of electronic and thermal Enthalpies= -477.859077 E <sub>0</sub> + H <sub>corr</sub>    |
| Sum of electronic and thermal Free Energies= -477.886519 E <sub>0</sub> + G <sub>corr</sub> |
| Zero-point correction ( <i>unscaled</i> ) = 0.074990                                        |
| Number of imaginary vibrational frequencies = 0                                             |

## 8.6 Calculations in EtOAc with DBUH<sup>+</sup> as HBD

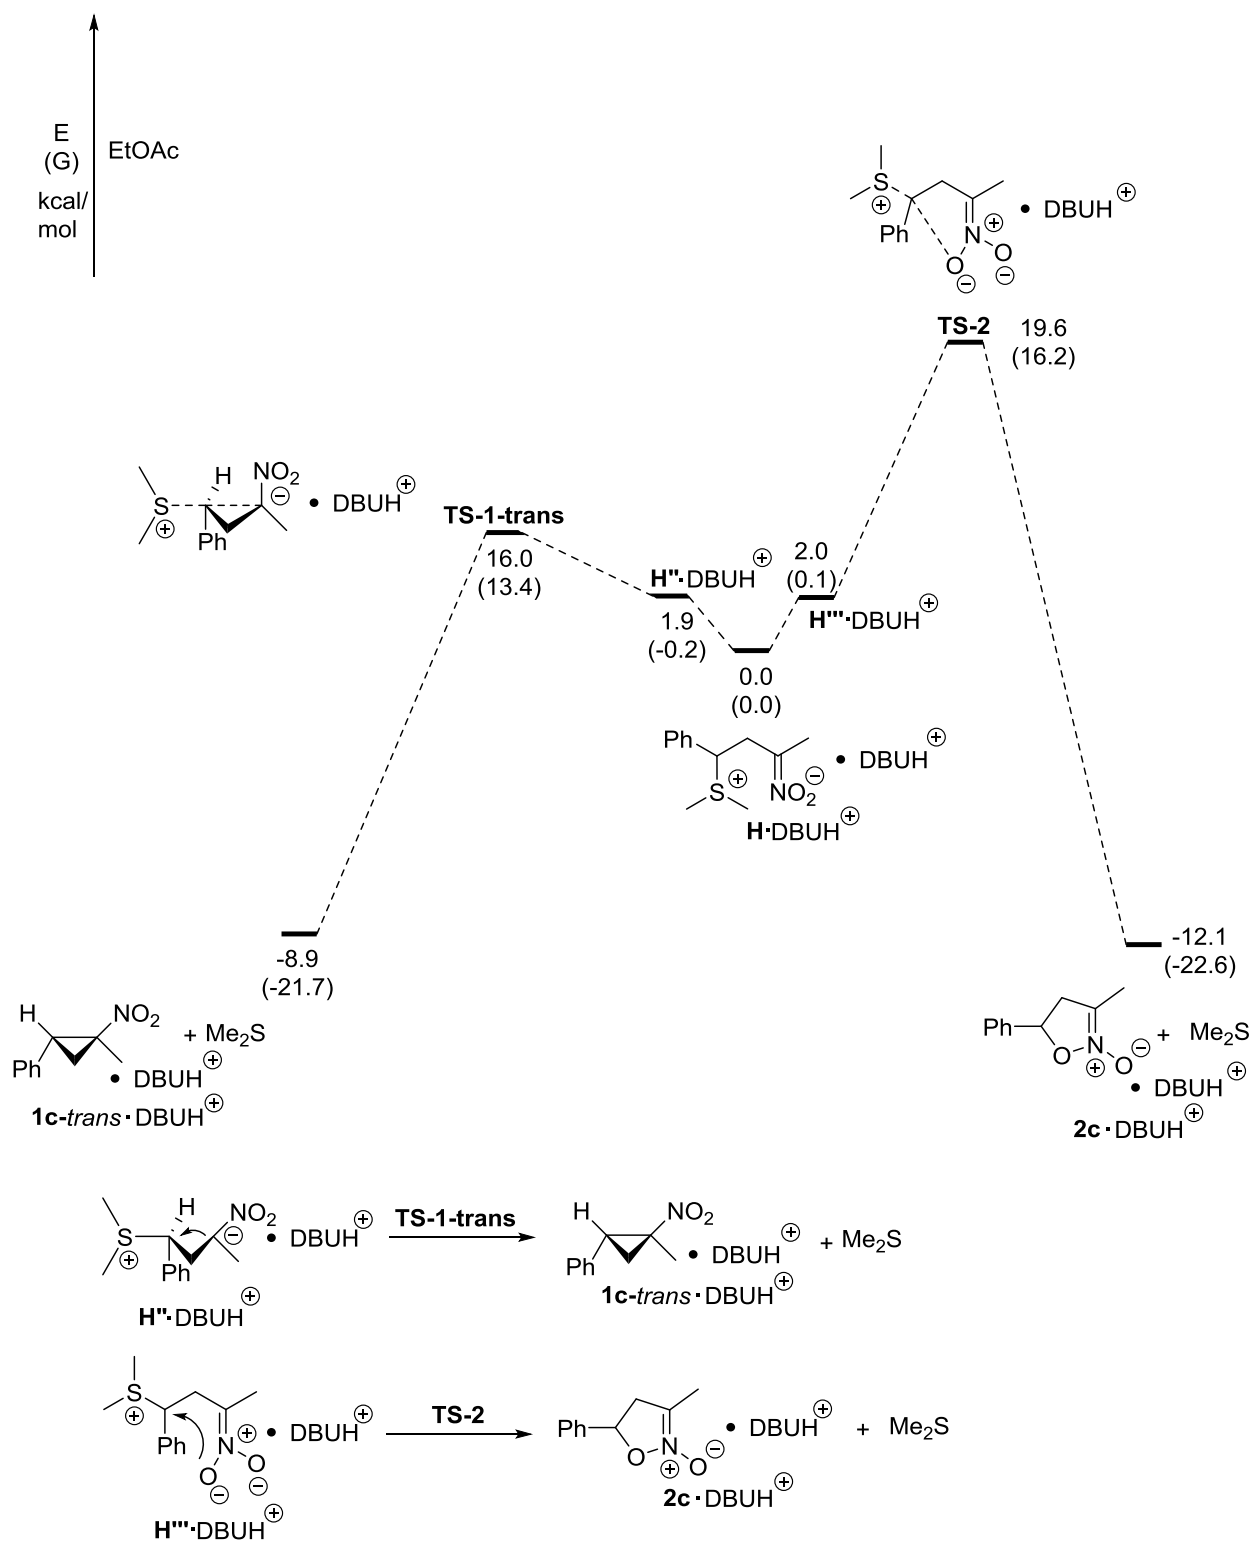

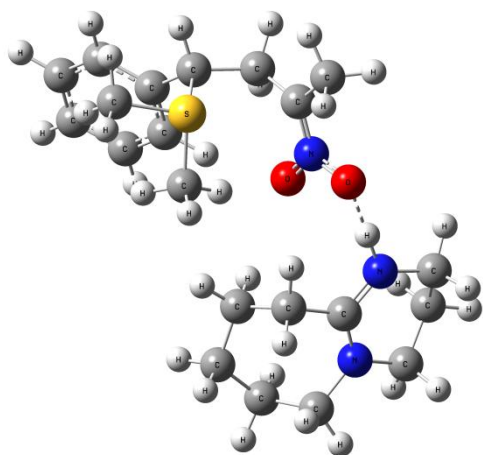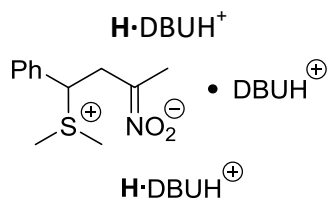

### Charge 1; multiplicity 1

C -3.20893400 6.30589000 -1.28120700  
 C -2.54882400 4.99023100 -1.55694400  
 C -3.21045200 3.66454800 -1.32490300  
 C -3.04201100 3.03388600 0.09566200  
 N -1.35040200 5.00544500 -2.10898700  
 O -0.69437600 3.93016300 -2.36735000  
 S -2.02625400 4.18630500 1.13299300  
 H -4.00086000 3.06850700 0.64611200  
 C -2.13922000 3.42625500 2.75602700  
 C -0.32348300 3.82364500 0.69581600  
 H -2.54691400 6.96538100 -0.68976000  
 H -3.43971000 6.84890100 -2.21872000  
 H -4.15047900 6.15152000 -0.72561400  
 H -2.82965600 2.94492100 -2.06617600  
 H -3.18545600 3.50484000 3.09608400  
 H -1.48768700 4.01434100 3.42443600  
 H -1.80543200 2.37632800 2.70808100  
 H -0.25335300 3.81739800 -0.41157000  
 H 0.29080000 4.63013400 1.13137400  
 H -0.04534300 2.84194200 1.11450000  
 H -4.29557200 3.78019900 -1.49033400  
 C -2.50468600 1.62305800 0.13136300  
 C -1.46680500 1.22598300 -0.72392100  
 C -3.04898600 0.69967100 1.03153600  
 C -0.97712100 -0.07804200 -0.66174000  
 H -1.05232500 1.95103800 -1.44066900  
 C -2.55952900 -0.60560500 1.08680500  
 H -3.87381100 1.00737000 1.68925200  
 C -1.51974400 -0.99425800 0.24200300  
 H -0.16548200 -0.38485200 -1.33308100  
 H -2.99787300 -1.32402300 1.79023100  
 H -1.13471500 -2.02076300 0.28197600  
 O -0.78720800 6.13796500 -2.37548700  
 H 0.43090200 5.80507500 -3.39831700  
 N 1.25913700 5.63959600 -4.04081300  
 C 1.13013200 5.90252900 -5.46697500  
 C 2.34003200 5.11811400 -3.50732600  
 H 1.45618200 6.93723900 -5.68835200  
 H 0.06298800 5.82016200 -5.72994500  
 C 1.97655700 4.89654500 -6.23323100  
 N 3.41085100 4.80920300 -4.23530100  
 C 2.32027800 4.83375000 -2.02829400  
 H 1.55210900 3.88451400 -6.09934600  
 H 1.97924000 5.12938800 -7.31054800

C 3.40031700 4.92968700 -5.69920200  
 C 4.64707100 4.31482300 -3.61713600  
 C 2.41957800 3.32860000 -1.72051000  
 H 1.36774700 5.23904000 -1.65023300  
 H 3.15104100 5.38340100 -1.54526500  
 H 3.98735700 4.08571800 -6.10147500  
 H 3.91260200 5.86791000 -5.98890900  
 H 4.93842200 4.98768000 -2.78886100  
 H 5.42791600 4.40137400 -4.39068800  
 C 4.53751700 2.87249100 -3.11906800  
 C 3.84161800 2.76470900 -1.76168400  
 H 1.75220400 2.78132400 -2.41340800  
 H 2.01129100 3.16885200 -0.70572600  
 H 5.55807600 2.45604600 -3.03602900  
 H 4.00475400 2.27266400 -3.88343000  
 H 3.81880800 1.70530400 -1.44603800  
 H 4.45588900 3.30352800 -1.01106700

|                                                                            |
|----------------------------------------------------------------------------|
| DFT M11; cc-pvdz+d, solvent EtOAc, SMD model                               |
| Total electronic energy= -1532.766559 $E_0$                                |
| Sum of electronic and zero-point Energies= -1532.235179 $E_0 + E_{ZPE}$    |
| Sum of electronic and thermal Energies= -1532.207161 $E_0 + E_{tot}$       |
| Sum of electronic and thermal Enthalpies= -1532.206217 $E_0 + H_{corr}$    |
| Sum of electronic and thermal Free Energies= -1532.289258 $E_0 + G_{corr}$ |
| Zero-point correction ( <i>unscaled</i> ) = 0.531379                       |
| Number of imaginary vibrational frequencies = 0                            |

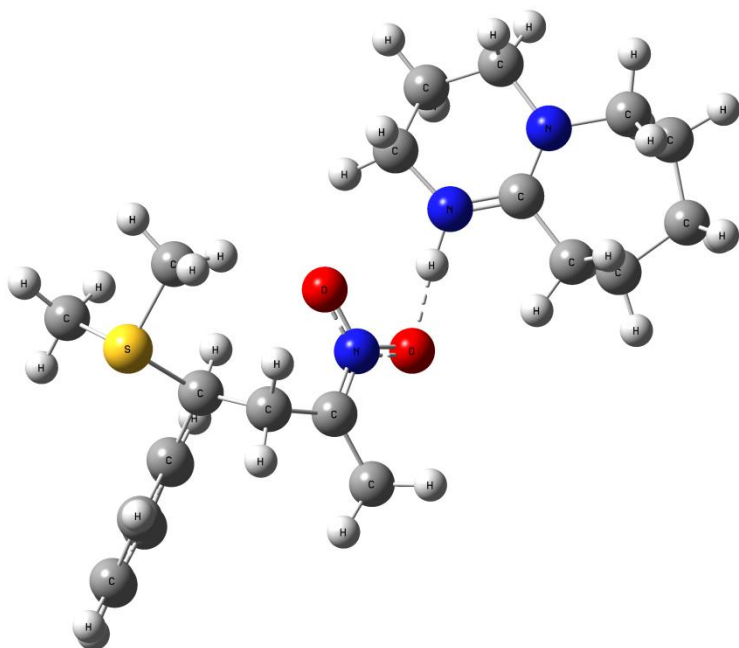

## Pre-reaction conformation

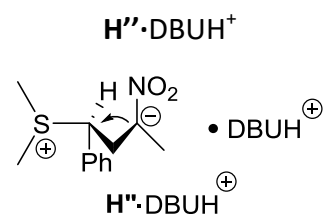

## Charge 1; multiplicity 1

C 1.74065500 0.43353500 -0.92115900  
 C 2.99344700 0.86645500 -0.22905000  
 H 2.76714100 1.56949900 0.59539100  
 H 3.67278100 1.36233900 -0.94353800  
 H 3.52587200 0.00895500 0.22672000  
 C 1.45084300 0.61674900 -2.37979200  
 H 1.00919200 -0.31374700 -2.78234800  
 H 2.37434200 0.84712900 -2.93814700  
 C 0.44696700 1.77935600 -2.51264900  
 H -0.33939300 1.64712700 -1.74682000  
 C 1.07291700 3.15039900 -2.42677100  
 C 0.74471400 3.98754900 -1.35673300  
 H 0.02331400 3.64277500 -0.60353400  
 C 1.34131000 5.24398000 -1.24050400  
 H 1.08641700 5.89188600 -0.39294300  
 C 2.25774800 5.67337200 -2.20007900  
 H 2.72401000 6.66222500 -2.11033600  
 C 2.58369500 4.84237600 -3.27445900  
 H 3.30466400 5.17725900 -4.03009100  
 C 1.99752100 3.58331200 -3.38586700  
 H 2.26450700 2.92909400 -4.22823100  
 N 0.76147200 -0.07444700 -0.20234700  
 O -0.36515400 -0.40874900 -0.72748800  
 O 0.91445500 -0.23586500 1.07357900  
 S -0.48083600 1.63633200 -4.09953200  
 C -1.78771900 2.83433200 -3.81424400  
 H -2.50819000 2.74212000 -4.64387600  
 H -2.26598700 2.62621600 -2.84193000  
 H -1.32443100 3.83506500 -3.82700900  
 C -1.34774600 0.07603600 -3.82416800  
 H -0.81601700 -0.70688400 -4.38812300  
 H -1.33404900 -0.13937800 -2.73836600  
 H -2.37050600 0.19150600 -4.21895500  
 H -0.31780300 -1.17574000 1.46223000  
 N -1.08247000 -1.85572100 1.76512300  
 C -2.41941600 -1.70715800 1.21449400  
 C -0.77112400 -2.79074100 2.63058300  
 H -2.51050300 -2.32173500 0.29829500



H -2.53896600 -0.65415600 0.91604900  
 C -3.43104300 -2.13972900 2.26550300  
 N -1.67142700 -3.65564600 3.09612000  
 C 0.65270700 -2.83619300 3.12040700  
 H -3.39407800 -1.43861200 3.11980700  
 H -4.45450600 -2.12670000 1.85594200  
 C -3.09281300 -3.54589000 2.74030100  
 C -1.29341500 -4.75139500 3.99714100  
 C 0.77780500 -2.53235500 4.62396100  
 H 1.21294700 -2.09874800 2.52186000  
 H 1.07496600 -3.83521900 2.89960300  
 H -3.67815700 -3.80394800 3.64036600  
 H -3.32725400 -4.29423900 1.95821200  
 H -0.45043300 -5.31685500 3.55677200  
 H -2.15841800 -5.43455400 4.01973600  
 C -0.94475600 -4.28103600 5.41126700  
 C 0.47660700 -3.72823200 5.52961700  
 H 0.12096300 -1.67803300 4.88001100  
 H 1.81332000 -2.19706400 4.81191600  
 H -1.05431000 -5.14096300 6.09715700  
 H -1.68839600 -3.52179200 5.72522600  
 H 0.67140100 -3.44455400 6.58022700  
 H 1.19010800 -4.54167800 5.28537800

|                                                                                              |
|----------------------------------------------------------------------------------------------|
| DFT M11; cc-pvdz+d, solvent EtOAc, SMD model                                                 |
| Total electronic energy= -1532.763475 E <sub>0</sub>                                         |
| Sum of electronic and zero-point Energies= -1532.232941 E <sub>0</sub> + E <sub>ZPE</sub>    |
| Sum of electronic and thermal Energies= -1532.204347 E <sub>0</sub> + E <sub>tot</sub>       |
| Sum of electronic and thermal Enthalpies= -1532.203403 E <sub>0</sub> + H <sub>corr</sub>    |
| Sum of electronic and thermal Free Energies= -1532.289524 E <sub>0</sub> + G <sub>corr</sub> |
| Zero-point correction ( <i>unscaled</i> ) = 0.530534                                         |
| Number of imaginary vibrational frequencies = 0                                              |

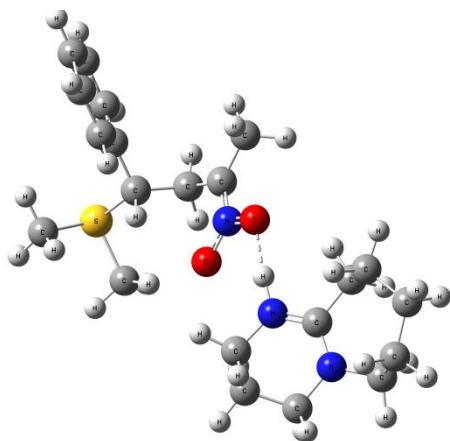

Pre-reaction conformation  $\text{H}^{\text{***}}\cdot\text{DBUH}^+$

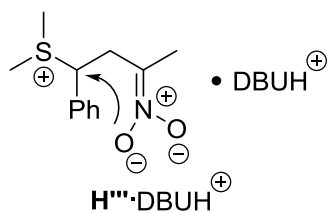

Charge 1; multiplicity 1

C -0.36280400 1.56498300 -1.28845000  
 C 0.31495700 1.66104200 -2.61784400  
 C -1.02344700 2.70324800 -0.57243600  
 O -0.81176100 0.29592200 0.54806100  
 O 0.28431800 -0.59641500 -1.15815900  
 C -0.07669500 3.15134300 0.55802000  
 S -1.03556500 4.02023500 1.87221700  
 H 1.37805600 1.36154700 -2.54268800  
 H -0.14930900 0.98607800 -3.36289100  
 H 0.26266400 2.69526100 -2.99932600  
 H -1.98404100 2.35824500 -0.14581500  
 H -1.21898800 3.54151600 -1.26280400  
 C 1.06480300 4.03019900 0.10767100  
 C 2.37658300 3.56656300 0.24310700  
 C 0.83083200 5.28825300 -0.46228500  
 C 3.44666900 4.34931400 -0.19267900  
 H 2.55562800 2.57712300 0.68499200  
 C 1.90111400 6.07272200 -0.88770600  
 H -0.19767200 5.65995800 -0.57692000  
 C 3.21004400 5.60337100 -0.75498400  
 H 4.47267300 3.97510500 -0.09085000  
 H 1.71249900 7.05806700 -1.33114700  
 H 4.05080100 6.22065600 -1.09476800  
 C -2.08105000 2.66230000 2.44462900  
 H -2.09765900 2.69704600 3.54629500  
 H -3.09554300 2.83008700 2.04928400  
 H -1.65731800 1.71472300 2.05900600  
 C 0.20443200 4.10342400 3.16965100  
 H 0.64116000 3.10096300 3.31917000  
 H 0.96889000 4.82993800 2.84692200  
 H -0.29634200 4.46456700 4.08309200  
 H 0.29443500 2.24738100 1.07557800  
 N -0.30592700 0.42705100 -0.62856100  
 H -0.22446300 -1.80949200 -0.24514400  
 N -0.58553000 -2.66596100 0.27810800  
 C -0.78405000 -2.58512000 1.71609600  
 C -0.81246400 -3.75835100 -0.41217600  
 H -1.82182100 -2.26251400 1.92712200  
 H -0.11216300 -1.80070300 2.09753700  
 C -0.50318000 -3.95039200 2.32616000  
 N -1.21948200 -4.88955800 0.16169100  
 C -0.55947200 -3.70560500 -1.89624100  
 H 0.56860500 -4.19347300 2.20389300  
 H -0.73451700 -3.95455400 3.40402500  
 C -1.35005500 -5.00031700 1.62107500

C -1.54057600 -6.08351500 -0.63048200  
 C 0.59487100 -4.62261500 -2.33847300  
 H -0.34005700 -2.65262200 -2.13879800  
 H -1.48963800 -3.98287300 -2.42817400  
 H -1.02585100 -6.01720200 1.90338100  
 H -2.41801300 -4.89726100 1.89606600  
 H -2.25813900 -5.81500500 -1.42879900  
 H -2.06687000 -6.76828800 0.05456100  
 C -0.30722300 -6.76615700 -1.22657300  
 C 0.19812300 -6.09122200 -2.50285100  
 H 1.43272000 -4.52670700 -1.62019100  
 H 0.96930400 -4.24570400 -3.30684400  
 H -0.57119400 -7.81494100 -1.45515100  
 H 0.48911800 -6.79481300 -0.45649800  
 H 1.06230000 -6.65712600 -2.89679400  
 H -0.59797700 -6.15595500 -3.27254000

|                                                                                              |
|----------------------------------------------------------------------------------------------|
| DFT M11; cc-pvdz+d, solvent EtOAc, SMD model                                                 |
| Total electronic energy= -1532.763433 E <sub>0</sub>                                         |
| Sum of electronic and zero-point Energies= -1532.232560 E <sub>0</sub> + E <sub>ZPE</sub>    |
| Sum of electronic and thermal Energies= -1532.204018 E <sub>0</sub> + E <sub>tot</sub>       |
| Sum of electronic and thermal Enthalpies= -1532.203074 E <sub>0</sub> + H <sub>corr</sub>    |
| Sum of electronic and thermal Free Energies= -1532.289102 E <sub>0</sub> + G <sub>corr</sub> |
| Zero-point correction ( <i>unscaled</i> ) = 0.530873                                         |
| Number of imaginary vibrational frequencies = 0                                              |

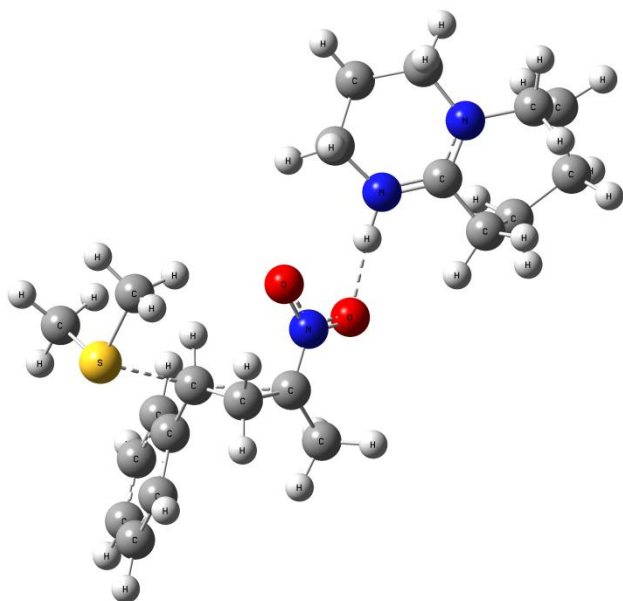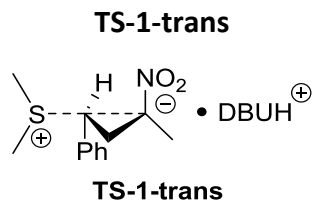

Charge 1; multiplicity 1

C 7.00074800 4.86749100 7.68563800  
 C 8.23943500 5.37720100 8.34575400  
 H 7.99888100 6.08933500 9.15669000  
 H 8.87654500 5.88440400 7.60171900  
 H 8.81810400 4.54837900 8.79680900  
 C 6.72729200 4.88893200 6.20905000  
 H 6.13452600 4.02610900 5.87215700  
 H 7.64037800 5.03786800 5.61522900  
 C 5.94222100 6.11584200 6.45908600  
 H 5.00796500 5.96544500 7.02183900  
 C 6.57930600 7.44976900 6.57371700  
 C 6.11418700 8.34109000 7.54933200  
 H 5.29717700 8.03067300 8.21492100  
 C 6.69543400 9.60117600 7.68423700  
 H 6.33227100 10.29139200 8.45534200  
 C 7.73860000 9.98011600 6.83869600  
 H 8.19560000 10.97201000 6.94250300  
 C 8.20073700 9.09837300 5.85791100  
 H 9.01589400 9.39922000 5.18869500  
 C 7.62553900 7.83756500 5.72520100  
 H 7.97969000 7.15228800 4.94359100  
 N 6.04294300 4.30321900 8.45836300  
 O 4.97218700 3.86713400 7.95601700  
 O 6.22838400 4.23090100 9.71226700  
 S 4.59313400 6.43070900 4.54692900  
 C 3.49447300 7.62019600 5.33399800  
 H 2.54186000 7.66860300 4.77939200  
 H 3.30741500 7.32912200 6.38432700  
 H 3.99004300 8.60527000 5.29907500  
 C 3.66592600 4.91009200 4.82290500  
 H 4.11940700 4.12345800 4.19659700  
 H 3.72193000 4.61749400 5.89014500  
 H 2.61689800 5.05598400 4.51400800  
 H 4.94494000 3.18739200 10.19805800  
 N 4.23490100 2.49692300 10.52701400  
 C 2.91426900 2.49632500 9.91485900  
 C 4.58802500 1.66351400 11.48178100  
 H 2.91422600 1.81970200 9.03903100  
 H 2.71612100 3.51561000 9.54860500  
 C 1.89987900 2.04674000 10.95534900

N 3.74311800 0.76852100 11.98091700  
 C 5.98669400 1.78151000 12.02646000  
 H 1.83341800 2.80642500 11.75589700  
 H 0.90054300 1.93591800 10.50378600  
 C 2.33911700 0.71562000 11.54717300  
 C 4.16784500 -0.21315700 12.98884600  
 C 6.01789300 2.21967000 13.50191600  
 H 6.51575300 2.51040000 11.39064900  
 H 6.49888400 0.80773400 11.90877700  
 H 1.73229900 0.46409100 12.43405800  
 H 2.22274800 -0.10412000 10.81200900  
 H 5.07393400 -0.73748400 12.63057600  
 H 3.36227400 -0.96389700 13.03578600  
 C 4.41118800 0.40136700 14.36885800  
 C 5.77539600 1.08098900 14.49456600  
 H 5.28226800 3.03299200 13.65725300  
 H 7.01323100 2.65630000 13.69788900  
 H 4.34083200 -0.40606900 15.12034000  
 H 3.59412600 1.11706100 14.58772900  
 H 5.89790600 1.46656300 15.52322900  
 H 6.56396900 0.31462400 14.34857900

|                                                                                              |
|----------------------------------------------------------------------------------------------|
| DFT M11; cc-pvdz+d, solvent EtOAc, SMD model                                                 |
| Total electronic energy= -1532.741042 E <sub>0</sub>                                         |
| Sum of electronic and zero-point Energies= -1532.211724 E <sub>0</sub> + E <sub>ZPE</sub>    |
| Sum of electronic and thermal Energies= -1532.183072 E <sub>0</sub> + E <sub>tot</sub>       |
| Sum of electronic and thermal Enthalpies= -1532.182127 E <sub>0</sub> + H <sub>corr</sub>    |
| Sum of electronic and thermal Free Energies= -1532.267887 E <sub>0</sub> + G <sub>corr</sub> |
| Zero-point correction ( <i>unscaled</i> ) = 0.529318                                         |
| Number of imaginary vibrational frequencies = 1; 550i                                        |

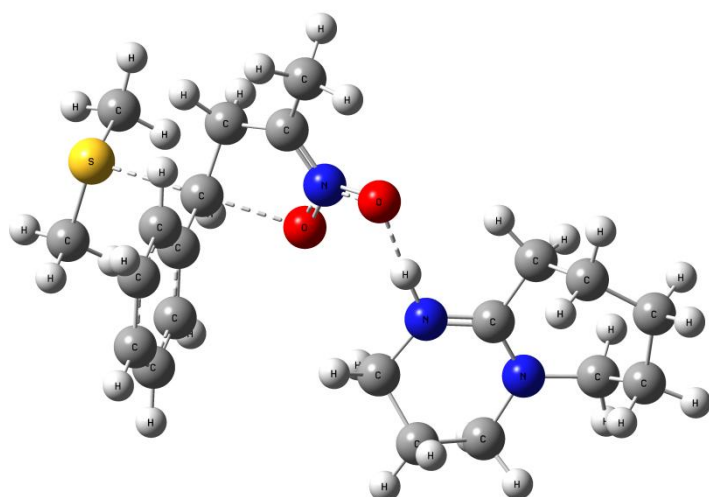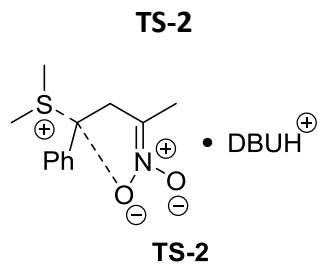

Charge 1; multiplicity 1

C 1.44884400 0.08029600 -1.32784900  
 C 1.48957600 0.37216400 -2.78754100  
 C 1.01037600 1.05493700 -0.27361300  
 O 1.72241100 -1.24902300 0.45113000  
 O 2.18875100 -2.07844400 -1.55637500  
 C 1.72191600 0.74516400 1.03809100  
 S 1.35038900 2.82951300 2.02192300  
 H 1.96704300 -0.46950500 -3.31194100  
 H 0.47269800 0.51697300 -3.20118000  
 H 2.06219000 1.29780500 -2.98663500  
 H -0.08305900 0.99546100 -0.10416300  
 H 1.23858400 2.08012800 -0.61795700  
 C 3.20539500 0.76855100 1.12849900  
 C 3.83692400 0.13236000 2.20594500  
 C 3.97809300 1.40243600 0.14998400  
 C 5.22489900 0.13607900 2.30626700  
 H 3.22595800 -0.38351500 2.95921000  
 C 5.36997800 1.40163800 0.25076700  
 H 3.49285500 1.90730700 -0.69586200  
 C 5.99406900 0.77187500 1.32697000  
 H 5.71413300 -0.36443100 3.15098700  
 H 5.97083900 1.89898700 -0.52022200  
 H 7.08833700 0.77359900 1.40419500  
 C -0.43748000 2.69005800 2.19271300  
 H -0.78142300 3.36426800 2.99564400  
 H -0.89559500 3.00105700 1.23914200  
 H -0.71644800 1.64622800 2.42734800  
 C 1.84666600 2.39824900 3.69581500  
 H 1.47196300 1.39039200 3.95242800  
 H 2.94840400 2.41897000 3.73649000  
 H 1.43928300 3.14497600 4.39848200  
 H 1.16267500 0.32725600 1.88198800  
 N 1.78325400 -1.08604500 -0.84802800  
 H 2.45269900 -3.26948100 -0.45867500  
 N 2.57466100 -4.07624400 0.21135200  
 C 3.23519700 -3.83946500 1.48511200  
 C 2.09478200 -5.24591900 -0.14279200  
 H 2.48634700 -3.51750000 2.23400800  
 H 3.94511100 -3.00815700 1.34461000  
 C 3.93174500 -5.12098600 1.91828900  
 N 2.20179000 -6.32040100 0.63444400

C 1.44511100 -5.34684300 -1.49736700  
 H 4.75968700 -5.34199800 1.21978300  
 H 4.35696800 -5.01211400 2.92945100  
 C 2.93318500 -6.26967600 1.90808500  
 C 1.59996200 -7.60610500 0.25694300  
 C 2.22695800 -6.25690300 -2.46209000  
 H 1.37840100 -4.31943900 -1.89202600  
 H 0.41212100 -5.72335700 -1.37248900  
 H 3.45146000 -7.23689000 2.02799800  
 H 2.20510600 -6.16996900 2.73677300  
 H 0.53371300 -7.45295700 0.00316100  
 H 1.62572700 -8.22956200 1.16551000  
 C 2.33157700 -8.30148600 -0.89342800  
 C 1.95413100 -7.75033600 -2.26958700  
 H 3.30986400 -6.04554200 -2.36570000  
 H 1.94385400 -5.97437700 -3.49160600  
 H 2.08455100 -9.37824400 -0.85750300  
 H 3.42286500 -8.21528400 -0.72177700  
 H 2.49202100 -8.31904300 -3.05019300  
 H 0.87267400 -7.93323600 -2.43559700

|                                                                                              |
|----------------------------------------------------------------------------------------------|
| DFT M11; cc-pvdz+d, solvent EtOAc, SMD model                                                 |
| Total electronic energy= -1532.735360 E <sub>0</sub>                                         |
| Sum of electronic and zero-point Energies= -1532.206755 E <sub>0</sub> + E <sub>ZPE</sub>    |
| Sum of electronic and thermal Energies= -1532.177993 E <sub>0</sub> + E <sub>tot</sub>       |
| Sum of electronic and thermal Enthalpies= -1532.177049 E <sub>0</sub> + H <sub>corr</sub>    |
| Sum of electronic and thermal Free Energies= -1532.263412 E <sub>0</sub> + G <sub>corr</sub> |
| Zero-point correction ( <i>unscaled</i> ) = 0.528605                                         |
| Number of imaginary vibrational frequencies = 1; 552i                                        |

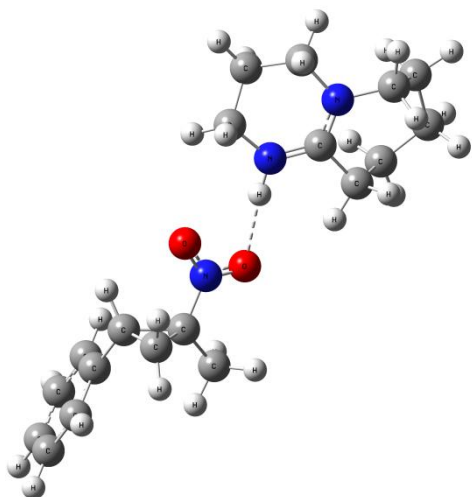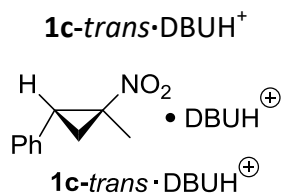

Charge 1; multiplicity 1

C 1.53501900 0.83807500 -0.96379200  
 C 2.84792400 1.18696100 -0.32453900  
 H 2.70023900 1.79932000 0.58167200  
 H 3.44700000 1.76485000 -1.04753400  
 H 3.40429000 0.27462700 -0.05054700  
 C 1.38649200 0.55795100 -2.44052500  
 H 0.71418700 -0.25827200 -2.72323100  
 H 2.31924400 0.64685100 -3.01024500  
 C 0.77467100 1.79776800 -1.87719600  
 H -0.31248500 1.76117800 -1.73001400  
 C 1.35854000 3.15677700 -2.11278400  
 C 1.18864300 4.15729700 -1.14704900  
 H 0.62872000 3.93248700 -0.22894400  
 C 1.72656900 5.42746800 -1.34378100  
 H 1.59018200 6.20270200 -0.57953300  
 C 2.43934400 5.71232300 -2.51093800  
 H 2.86327300 6.71210100 -2.66648600  
 C 2.60755900 4.72220500 -3.47828200  
 H 3.16093900 4.94193900 -4.39979900  
 C 2.07010200 3.44886800 -3.27938500  
 H 2.19782800 2.67425500 -4.04666600  
 N 0.64438000 0.03432200 -0.11065800  
 O -0.42894000 -0.33492800 -0.55096300  
 O 1.02668900 -0.22643300 1.02281500  
 H -0.43586100 -1.40651400 1.60215400  
 N -1.13461300 -2.09772200 1.88769600  
 C -2.45793200 -2.05988200 1.27508100  
 C -0.77025000 -2.98684500 2.79450700  
 H -2.45461600 -2.66597900 0.34945900  
 H -2.67244300 -1.01583100 0.99822700  
 C -3.46344700 -2.59899400 2.28031500  
 N -1.60608300 -3.91634700 3.22824000  
 C 0.62191800 -2.88265600 3.35663500  
 H -3.54299700 -1.89904500 3.13217000  
 H -4.45921800 -2.69144700 1.81758300  
 C -3.00596100 -3.96190000 2.77603200  
 C -1.17639900 -4.95729900 4.17587300  
 C 0.63348100 -2.53789700 4.85763500  
 H 1.15103600 -2.10658300 2.77942000  
 H 1.15090000 -3.83830500 3.18000700  
 H -3.61447700 -4.28795000 3.63664800  
 H -3.09766700 -4.72825800 1.98266700



H -0.26131800 -5.44436500 3.78988100  
H -1.97334300 -5.71816000 4.16579600  
C -0.95215600 -4.42902800 5.59372500  
C 0.40146900 -3.74092200 5.77354000  
H -0.11542100 -1.74684100 5.05725300  
H 1.62085000 -2.10044700 5.08789900  
H -1.01655600 -5.28456600 6.29017800  
H -1.78093100 -3.74072400 5.85202700  
H 0.51050100 -3.41854700 6.82502400  
H 1.20248200 -4.48470100 5.58590000

|                                                                            |
|----------------------------------------------------------------------------|
| DFT M11; cc-pvdz+d, solvent EtOAc, SMD model                               |
| Total electronic energy= -1054.840660 $E_0$                                |
| Sum of electronic and zero-point Energies= -1054.386959 $E_0 + E_{ZPE}$    |
| Sum of electronic and thermal Energies= -1054.363912 $E_0 + E_{tot}$       |
| Sum of electronic and thermal Enthalpies= -1054.362968 $E_0 + H_{corr}$    |
| Sum of electronic and thermal Free Energies= -1054.437084 $E_0 + G_{corr}$ |
| Zero-point correction ( <i>unscaled</i> ) = 0.453701                       |
| Number of imaginary vibrational frequencies = 0                            |

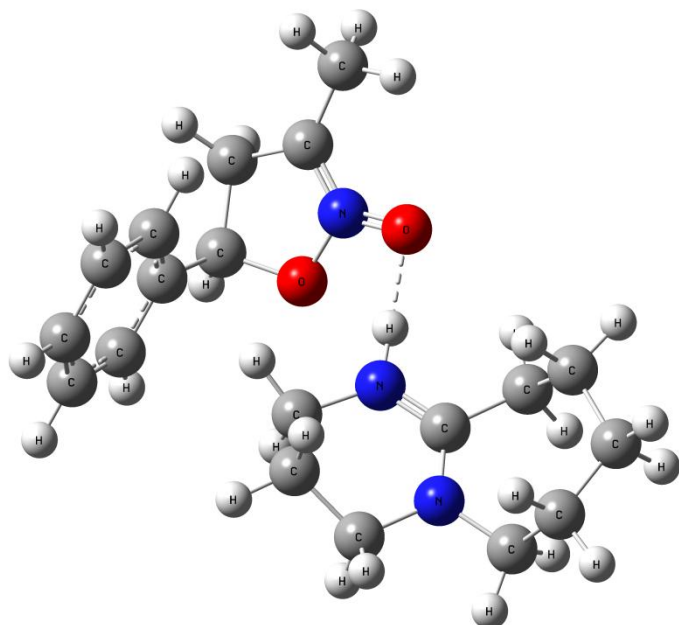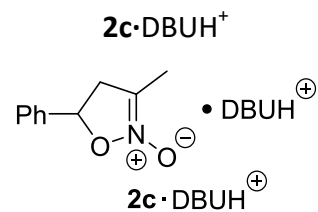

### Charge 1; multiplicity 1

C -1.19491400 2.10903000 -1.88490000  
 C -1.18856100 2.43728800 -3.33314600  
 C -1.16616000 3.03928100 -0.71234200  
 O -1.25483300 0.76750300 -0.07450700  
 O -1.26563500 -0.20746400 -2.09191000  
 C -0.85223900 2.07366600 0.44269400  
 H -1.17791100 1.50849400 -3.92414600  
 H -2.08634100 3.02693900 -3.59316000  
 H -0.30183100 3.04726000 -3.58273800  
 H -2.14537200 3.53613100 -0.58668900  
 H -0.39536400 3.82101000 -0.82453200  
 C 0.60247600 1.97783400 0.84742900  
 C 0.91402600 1.65410400 2.17067000  
 C 1.63370100 2.08698300 -0.09357300  
 C 2.23650600 1.42528100 2.55177900  
 H 0.10415400 1.57033500 2.90831000  
 C 2.95603100 1.85472500 0.28510300  
 H 1.41113600 2.34875700 -1.13695700  
 C 3.25888100 1.51833400 1.60629800  
 H 2.47038800 1.17494400 3.59402200  
 H 3.75852200 1.94030700 -0.45798800  
 H 4.30006400 1.33907900 1.90205200  
 H -1.48492400 2.25122000 1.32600200  
 N -1.23369200 0.88267500 -1.47389800  
 H -0.50631500 -1.37264100 -1.00033500  
 N -0.04430200 -2.05638600 -0.37387600  
 C 0.87851800 -1.57604400 0.64679900  
 C -0.31415900 -3.33110600 -0.57022500  
 H 0.31891500 -1.35615700 1.57657800  
 H 1.32120400 -0.63117600 0.29016400  
 C 1.93904100 -2.64038200 0.88169300  
 N 0.25437100 -4.28671000 0.15167200  
 C -1.27251500 -3.67526600 -1.67849300  
 H 2.57399000 -2.73018900 -0.01882500  
 H 2.58457400 -2.35920400 1.73000100  
 C 1.26862300 -3.97533000 1.17042300  
 C -0.09476500 -5.70244700 -0.03771300  
 C -0.60132000 -4.44849900 -2.82816100  
 H -1.69798600 -2.72589600 -2.04408000

H -2.10559000 -4.26746500 -1.25473500  
H 2.00852300 -4.79402200 1.15533000  
H 0.78462500 -3.97175200 2.16600900  
H -1.19328200 -5.81943000 0.02154500  
H 0.33287400 -6.23539200 0.82677200  
C 0.43807900 -6.28494600 -1.34858500  
C -0.43472100 -5.94494900 -2.55779900  
H 0.37781100 -3.98407500 -3.05646400  
H -1.22814700 -4.31673100 -3.72767600  
H 0.48802700 -7.38348000 -1.23925100  
H 1.47642300 -5.92885900 -1.49949800  
H -0.01498000 -6.42902400 -3.45849600  
H -1.43944400 -6.38758800 -2.40099700

|                                                                            |
|----------------------------------------------------------------------------|
| DFT M11; cc-pvdz+d, solvent EtOAc, SMD model                               |
| Total electronic energy= -1054.845799 $E_0$                                |
| Sum of electronic and zero-point Energies= -1054.391162 $E_0 + E_{ZPE}$    |
| Sum of electronic and thermal Energies= -1054.368630 $E_0 + E_{tot}$       |
| Sum of electronic and thermal Enthalpies= -1054.367686 $E_0 + H_{corr}$    |
| Sum of electronic and thermal Free Energies= -1054.438473 $E_0 + G_{corr}$ |
| Zero-point correction ( <i>unscaled</i> ) = 0.454637                       |
| Number of imaginary vibrational frequencies = 0                            |

## 8.7 Calculations in 2,2,2-trifluoroethanol (TFE) with DBUH<sup>+</sup> as HBD

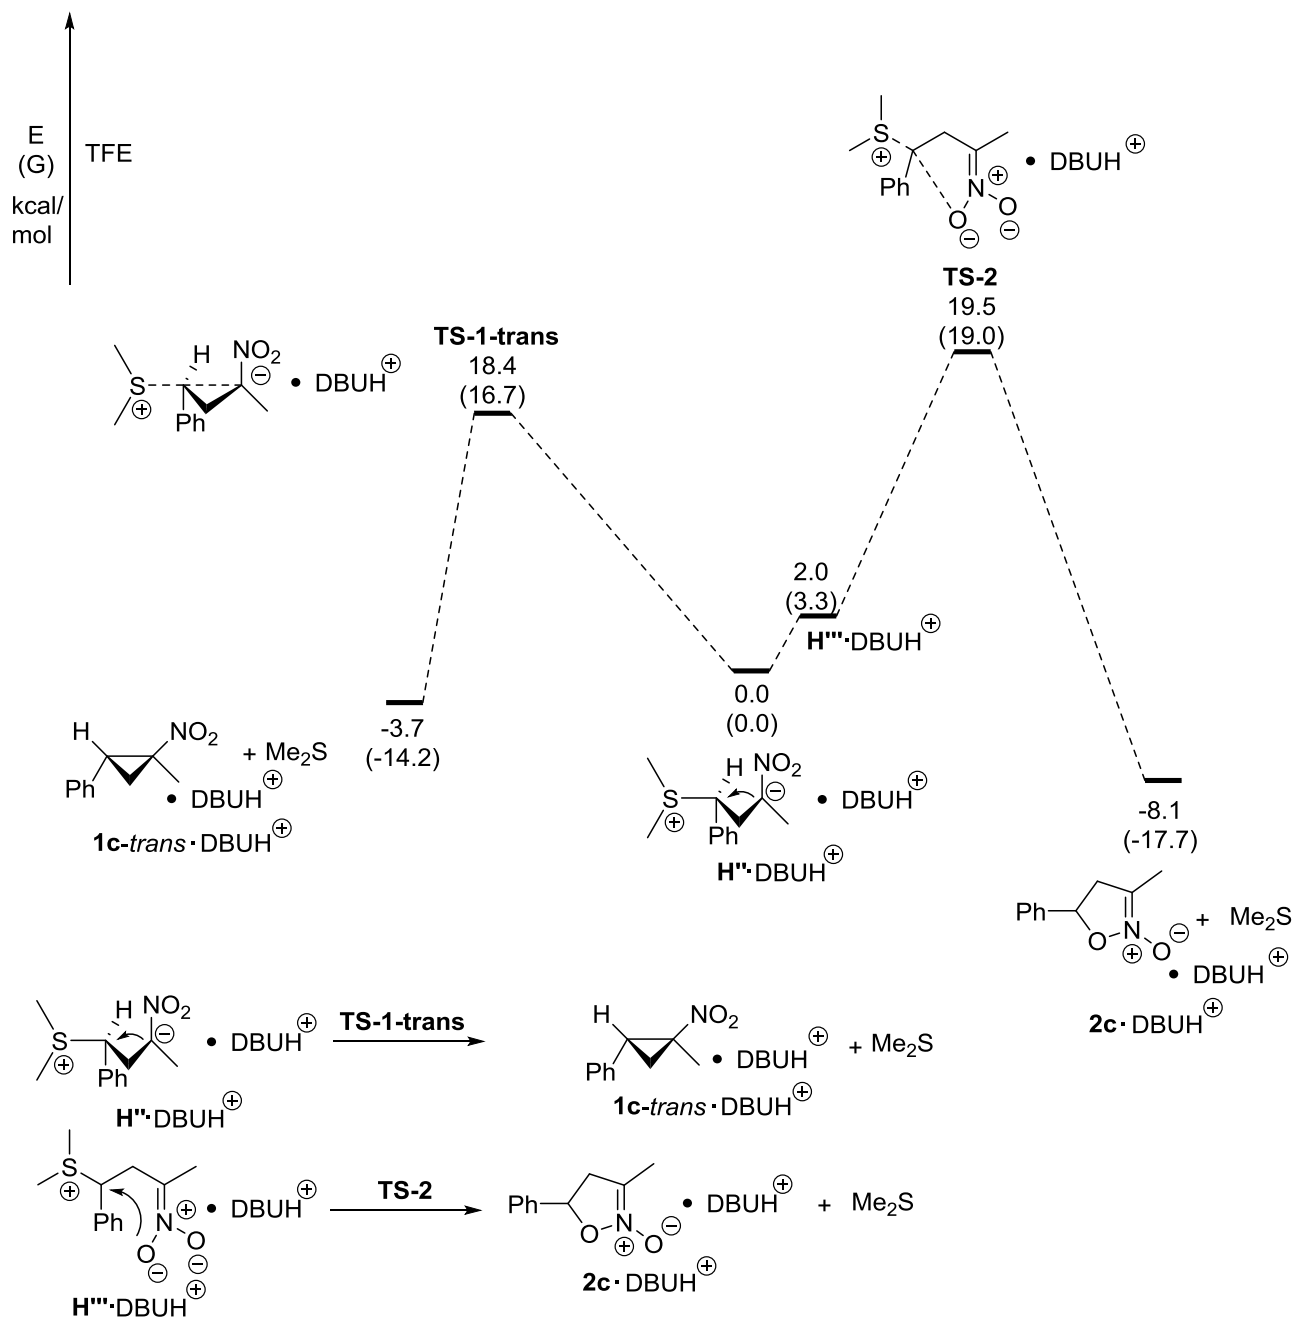

Pre-reaction conformation  $\text{H}^{\ominus}\cdot\text{DBUH}^{\oplus}$

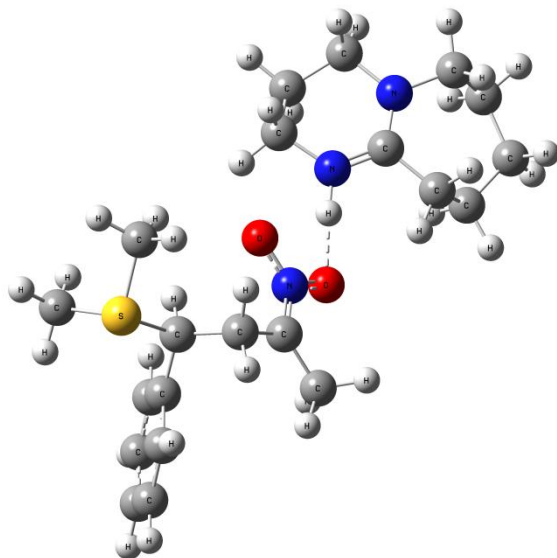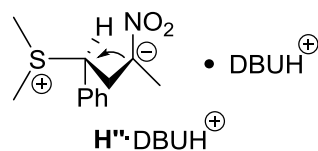

Charge 1; multiplicity 1

C 1.68237200 0.35904300 -1.09205900  
 C 2.95452900 0.82877500 -0.46193100  
 H 2.75197400 1.58087500 0.32597200  
 H 3.61324600 1.28042600 -1.22283100  
 H 3.49553000 -0.00551300 0.02529400  
 C 1.33959300 0.52319500 -2.54257900  
 H 0.85791400 -0.39998500 -2.91173700  
 H 2.25192300 0.71709300 -3.13284200  
 C 0.36304100 1.70723100 -2.65770000  
 H -0.49297100 1.52432600 -1.98161600  
 C 0.99708000 3.04801600 -2.36789500  
 C 0.52569900 3.80828400 -1.29372000  
 H -0.31545700 3.43336400 -0.69504000  
 C 1.12763300 5.02813500 -0.98059600  
 H 0.75789500 5.61627500 -0.13149700  
 C 2.19515800 5.49700500 -1.74666400  
 H 2.66759700 6.45658800 -1.50202300  
 C 2.66288900 4.74378300 -2.82619400  
 H 3.50128800 5.11038400 -3.43134800  
 C 2.06906200 3.52109300 -3.13503200  
 H 2.44704100 2.92849500 -3.98042900  
 N 0.75377300 -0.15906800 -0.32456300  
 O -0.39297700 -0.53146200 -0.78680800  
 O 0.96989200 -0.30372600 0.95131300  
 S -0.38814900 1.75490300 -4.33664600  
 C -1.68458900 2.96875100 -4.07689200  
 H -2.31192400 2.97473700 -4.98369400  
 H -2.26888100 2.68710700 -3.18436600  
 H -1.19620900 3.94906200 -3.94807000  
 C -1.33370100 0.22474000 -4.33071600  
 H -0.66793400 -0.58755600 -4.66318800  
 H -1.71632100 0.04040100 -3.31155000  
 H -2.15615800 0.35296800 -5.05391100  
 H -0.32208500 -1.23413100 1.47144500  
 N -1.10121200 -1.82994600 1.85138300  
 C -2.46861000 -1.54610400 1.44199400  
 C -0.79211600 -2.79014600 2.69556300  
 H -2.71699400 -2.13924000 0.54070100  
 H -2.52220700 -0.48041800 1.16696900  
 C -3.40211000 -1.88844400 2.59208300  
 N -1.71699000 -3.56392500 3.25311200

C 0.66141000 -2.96988000 3.03900400  
 H -3.21301000 -1.19804600 3.43486000  
 H -4.45523400 -1.77821700 2.28575000  
 C -3.15131900 -3.32102200 3.03718800  
 C -1.35464500 -4.67307100 4.14626700  
 C 0.96210100 -2.64988300 4.51416300  
 H 1.23009200 -2.30230900 2.37097700  
 H 0.95797400 -4.00971400 2.80320900  
 H -3.66657700 -3.52634900 3.99167500  
 H -3.52821600 -4.04221000 2.28645900  
 H -0.61099900 -5.31997300 3.64401900  
 H -2.27085300 -5.27364800 4.26741000  
 C -0.83110300 -4.21159900 5.50749300  
 C 0.63988700 -3.79391100 5.47748700  
 H 0.41324500 -1.73244000 4.80495300  
 H 2.03790400 -2.41161200 4.59234900  
 H -0.95286800 -5.04719800 6.22097000  
 H -1.46873700 -3.38162000 5.87140900  
 H 0.95918700 -3.50803800 6.49683000  
 H 1.24860700 -4.67560000 5.19030700

|                                                                                              |
|----------------------------------------------------------------------------------------------|
| DFT M11; cc-pvdz+d, solvent TFE, SMD model                                                   |
| Total electronic energy= -1532.776704 E <sub>0</sub>                                         |
| Sum of electronic and zero-point Energies= -1532.246396 E <sub>0</sub> + E <sub>ZPE</sub>    |
| Sum of electronic and thermal Energies= -1532.217577 E <sub>0</sub> + E <sub>tot</sub>       |
| Sum of electronic and thermal Enthalpies= -1532.216633 E <sub>0</sub> + H <sub>corr</sub>    |
| Sum of electronic and thermal Free Energies= -1532.303663 E <sub>0</sub> + G <sub>corr</sub> |
| Zero-point correction ( <i>unscaled</i> ) = 0.530308                                         |
| Number of imaginary vibrational frequencies = 0                                              |

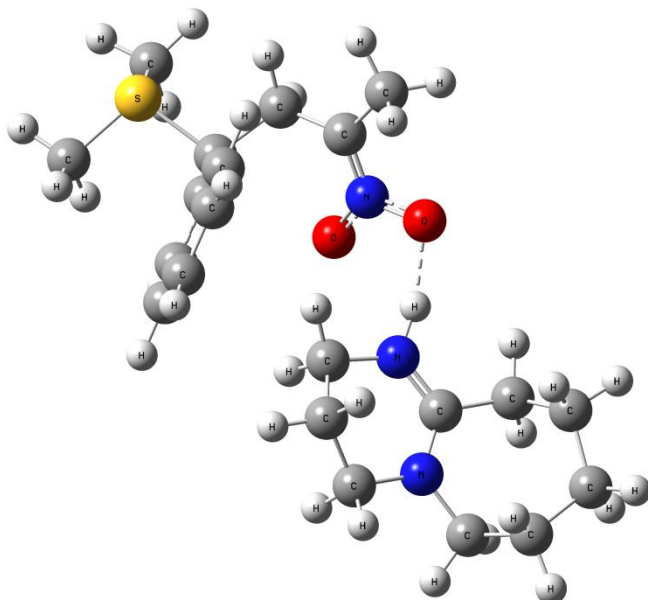

Pre-reaction conformation  $\text{H}^{\bullet\bullet\bullet}\cdot\text{DBUH}^+$

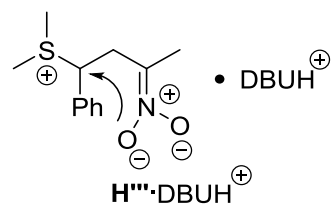

Charge 1; multiplicity 1

C -0.95534300 2.15094900 -1.60538300  
 C -0.33242700 2.40206900 -2.94287000  
 C -1.33322800 3.24601900 -0.65139800  
 O -1.73246200 0.60277500 -0.13215300  
 O -0.95367300 -0.05021600 -2.10932200  
 C -0.80894800 3.07166400 0.79510000  
 S -0.72058600 4.76672100 1.52273700  
 H 0.61907500 1.84417800 -3.04497800  
 H -0.98995600 2.05933600 -3.76526200  
 H -0.13089900 3.47787200 -3.07888000  
 H -2.43583600 3.33428500 -0.58646000  
 H -0.95657200 4.19339000 -1.08091300  
 C 0.55723800 2.44657100 0.95688600  
 C 0.79997600 1.62224700 2.06118800  
 C 1.58674200 2.69565000 0.04144100  
 C 2.05958100 1.05537400 2.25496200  
 H -0.01456100 1.42145700 2.77148100  
 C 2.84111100 2.11329300 0.22605600  
 H 1.40974300 3.35091900 -0.82281500  
 C 3.07980900 1.29517300 1.33311900  
 H 2.24147700 0.41313000 3.12618600  
 H 3.64198300 2.30593200 -0.49851000  
 H 4.06947600 0.84341700 1.47784200  
 C -2.44526200 5.26776300 1.48883700  
 H -2.52860100 6.16656400 2.12263000  
 H -2.70592100 5.51958100 0.44821000  
 H -3.07078500 4.44607400 1.87721300  
 C -0.50393900 4.43618100 3.27232300  
 H -1.25116100 3.69546600 3.60381300  
 H 0.52584300 4.07312200 3.42118900  
 H -0.63952400 5.39925900 3.79311100  
 H -1.54284800 2.53367600 1.41676300  
 N -1.22196400 0.91393400 -1.27208700  
 H -0.69079900 -1.37026400 -1.16092600  
 N -0.23094400 -2.04523000 -0.49632900  
 C 0.68684400 -1.45026400 0.46215000  
 C -0.40065900 -3.34002300 -0.63325700  
 H 0.14906100 -1.22224600 1.40243800  
 H 1.03140600 -0.49309100 0.03049800

C 1.83461400 -2.41691400 0.70633500  
 N 0.24718100 -4.21574000 0.12824000  
 C -1.33473700 -3.80972300 -1.71478100  
 H 2.43928100 -2.50936800 -0.21494800  
 H 2.49042600 -2.05107000 1.51400800  
 C 1.27220400 -3.77864200 1.08798200  
 C -0.00859200 -5.65885000 0.03056900  
 C -0.60963900 -4.60259900 -2.81687400  
 H -1.81232800 -2.90996300 -2.13776300  
 H -2.13354200 -4.42564300 -1.25946800  
 H 2.06890800 -4.54260000 1.08545200  
 H 0.82869100 -3.75411200 2.10223800  
 H -1.09589200 -5.84424500 0.11528000  
 H 0.46209900 -6.10950000 0.91951500  
 C 0.54445300 -6.29045300 -1.24787600  
 C -0.35386500 -6.06953600 -2.46571400  
 H 0.34182800 -4.09171500 -3.06418900  
 H -1.23598300 -4.55942700 -3.72573600  
 H 0.65237200 -7.37666200 -1.07280600  
 H 1.56150600 -5.89078600 -1.43145000  
 H 0.08846200 -6.57756600 -3.34263900  
 H -1.33055400 -6.55952000 -2.27495800

|                                                                                              |
|----------------------------------------------------------------------------------------------|
| DFT M11; cc-pvdz+d, solvent TFE, SMD model                                                   |
| Total electronic energy= -1532.773504 E <sub>0</sub>                                         |
| Sum of electronic and zero-point Energies= -1532.243416 E <sub>0</sub> + E <sub>ZPE</sub>    |
| Sum of electronic and thermal Energies= -1532.214848 E <sub>0</sub> + E <sub>tot</sub>       |
| Sum of electronic and thermal Enthalpies= -1532.213904 E <sub>0</sub> + H <sub>corr</sub>    |
| Sum of electronic and thermal Free Energies= -1532.298410 E <sub>0</sub> + G <sub>corr</sub> |
| Zero-point correction ( <i>unscaled</i> ) = 0.530087                                         |
| Number of imaginary vibrational frequencies = 0                                              |



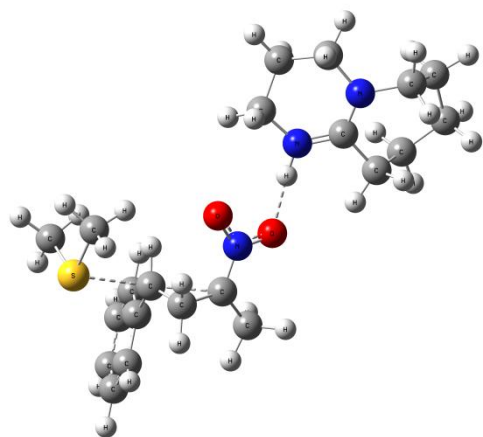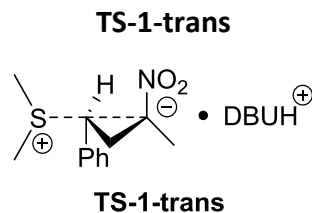

Charge 1; multiplicity 1

C 6.97959400 4.81899900 7.60328000  
 C 8.25556000 5.29139700 8.21900200  
 H 8.06846800 6.04579100 9.00648400  
 H 8.90275200 5.73446300 7.44409100  
 H 8.79627200 4.44731200 8.68825500  
 C 6.66073300 4.84094600 6.13380800  
 H 6.02252700 4.00284200 5.81965000  
 H 7.56023200 4.95531100 5.51291600  
 C 5.93852000 6.09119900 6.43306700  
 H 4.99602300 5.97807600 6.99114800  
 C 6.61547400 7.40314200 6.54014300  
 C 6.15712800 8.31927300 7.49667200  
 H 5.31684400 8.04155800 8.14772100  
 C 6.77146000 9.56418700 7.62711600  
 H 6.41247000 10.27451100 8.38196900  
 C 7.84089300 9.90254600 6.79689900  
 H 8.32396300 10.88267200 6.89673100  
 C 8.29690600 8.99508900 5.83629500  
 H 9.13364700 9.26385400 5.17985000  
 C 7.68921800 7.74919600 5.70726900  
 H 8.04193800 7.04466700 4.94251500  
 N 6.04277300 4.27890100 8.41281800  
 O 4.94483000 3.85574200 7.95536100  
 O 6.26913900 4.21008300 9.66165600  
 S 4.55237600 6.51159400 4.49730400  
 C 3.52155100 7.73365900 5.32594100  
 H 2.55624000 7.82341000 4.79871200  
 H 3.35239300 7.43735400 6.37798900  
 H 4.05141000 8.70066600 5.28706800  
 C 3.54492100 5.03947200 4.74795600  
 H 3.99819900 4.21916100 4.16625400  
 H 3.51968500 4.76899700 5.82113800  
 H 2.52181900 5.22410400 4.37801700  
 H 4.94662300 3.14813700 10.23170800  
 N 4.23274700 2.47997900 10.57591000  
 C 2.89904400 2.50473200 9.98993400  
 C 4.58664100 1.64480300 11.53255300  
 H 2.86701500 1.83178600 9.11170700  
 H 2.70556000 3.53026500 9.63733700  
 C 1.89866300 2.06926400 11.04813900  
 N 3.73800000 0.76142100 12.03967500  
 C 5.98880200 1.74860900 12.06541800  
 H 1.86039900 2.82847000 11.85110300  
 H 0.89036000 1.97617900 10.61294000  
 C 2.32568500 0.73083400 11.62933500

C 4.15502000 -0.20190900 13.06915800  
 C 6.02312400 2.22596200 13.52877100  
 H 6.53163600 2.45158400 11.41272200  
 H 6.48186700 0.76277800 11.97222500  
 H 1.73055000 0.48840200 12.52634700  
 H 2.18403200 -0.08593900 10.89578100  
 H 5.05743200 -0.73966500 12.72273500  
 H 3.34406500 -0.94554700 13.13077900  
 C 4.40045500 0.44035300 14.43527300  
 C 5.76868800 1.11435000 14.54864200  
 H 5.29199000 3.04796000 13.65966600  
 H 7.02192400 2.65893700 13.71561800  
 H 4.32573000 -0.35226800 15.20215200  
 H 3.58655400 1.16397200 14.63959100  
 H 5.89005700 1.52519200 15.56797700  
 H 6.55231000 0.33931200 14.42383800

|                                                                                              |
|----------------------------------------------------------------------------------------------|
| DFT M11; cc-pvdz+d, solvent TFE, SMD model                                                   |
| Total electronic energy= -1532.747359 E <sub>0</sub>                                         |
| Sum of electronic and zero-point Energies= -1532.219214 E <sub>0</sub> + E <sub>ZPE</sub>    |
| Sum of electronic and thermal Energies= -1532.190187 E <sub>0</sub> + E <sub>tot</sub>       |
| Sum of electronic and thermal Enthalpies= -1532.189242 E <sub>0</sub> + H <sub>corr</sub>    |
| Sum of electronic and thermal Free Energies= -1532.277108 E <sub>0</sub> + G <sub>corr</sub> |
| Zero-point correction ( <i>unscaled</i> ) = 0.528145                                         |
| Number of imaginary vibrational frequencies = 1; 601i                                        |

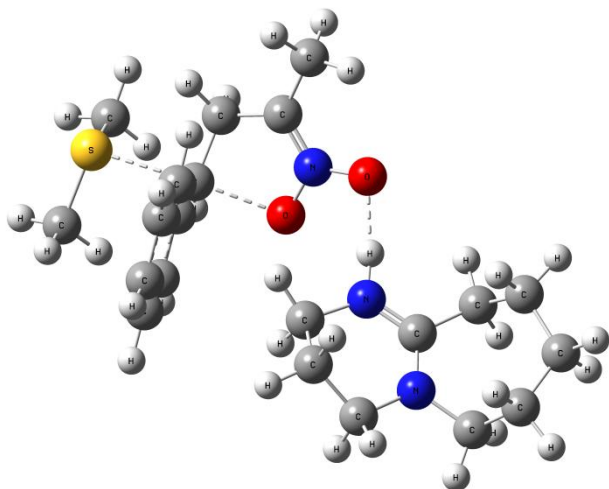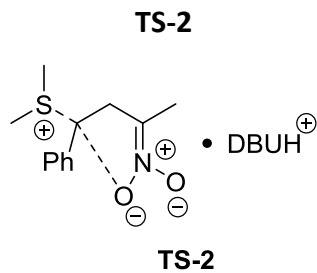

Charge 1; multiplicity 1

C 1.33561000 0.26065200 -1.40117800  
 C 1.58119700 0.54055200 -2.84235200  
 C 1.17994700 1.32597900 -0.35680400  
 O 0.99279000 -1.10869400 0.34174500  
 O 1.26721500 -2.01668700 -1.67377100  
 C 1.53218000 0.77619700 1.01684900  
 S 1.71793200 2.92943200 2.04240600  
 H 1.84274900 -0.39120400 -3.36652100  
 H 0.68359500 0.97714100 -3.32132900  
 H 2.40476800 1.26953500 -2.95430500  
 H 0.13747600 1.69770400 -0.34114900  
 H 1.83537100 2.17567600 -0.62030200  
 C 2.90732300 0.32768700 1.34587100  
 C 3.13686200 -0.32240900 2.56662400  
 C 3.96634900 0.51332500 0.44834500  
 C 4.41233400 -0.77793900 2.88944500  
 H 2.29771000 -0.48210100 3.25725700  
 C 5.24073900 0.04454200 0.77048100  
 H 3.80302300 1.03101700 -0.50591700  
 C 5.46618100 -0.59869700 1.98868500  
 H 4.58570300 -1.28507600 3.84703300  
 H 6.06687100 0.18887900 0.06333000  
 H 6.47114100 -0.96101000 2.23985500  
 C -0.00299700 3.42740600 1.84547800  
 H -0.23992500 4.21776200 2.57817500  
 H -0.12598900 3.82859600 0.82564000  
 H -0.66857000 2.55750900 1.99620100  
 C 1.67404100 2.40038200 3.76200000  
 H 0.95017600 1.57430500 3.88610900  
 H 2.68738000 2.06761200 4.04138000  
 H 1.38407200 3.25716000 4.39414300  
 H 0.74398200 0.59727700 1.75680300  
 N 1.19827500 -0.95062400 -0.94848700  
 H 1.77968100 -3.23676400 -0.63268400  
 N 2.26174400 -3.91161900 0.00596000  
 C 3.21397500 -3.36733800 0.96227800  
 C 2.04743500 -5.20013700 -0.14717600  
 H 2.70017400 -3.16072600 1.92068800  
 H 3.57653300 -2.40581700 0.55954200  
 C 4.34139800 -4.36866800 1.15399100  
 N 2.68828400 -6.10803700 0.57941800  
 C 1.06713400 -5.62072100 -1.20753200  
 H 4.92177100 -4.45265600 0.21649900

H 5.02422700 -4.03669900 1.95398900  
 C 3.75479000 -5.72446300 1.51735100  
 C 2.39170000 -7.54193000 0.45524500  
 C 1.73676100 -6.40457400 -2.35058500  
 H 0.59628900 -4.70074000 -1.59241200  
 H 0.27007700 -6.22885700 -0.73916000  
 H 4.52960000 -6.50910400 1.46899800  
 H 3.34286100 -5.71653000 2.54489000  
 H 1.30267300 -7.70092500 0.56622300  
 H 2.87496300 -8.02513300 1.31989600  
 C 2.89365100 -8.15481700 -0.85299400  
 C 1.96698800 -7.88475300 -2.03944400  
 H 2.69219800 -5.91099100 -2.61698800  
 H 1.08278300 -6.32553100 -3.23724400  
 H 2.98081800 -9.24702500 -0.70629700  
 H 3.91438300 -7.77432900 -1.05592000  
 H 2.37184000 -8.38310200 -2.93966600  
 H 0.98452100 -8.35565100 -1.83126200

|                                                                                              |
|----------------------------------------------------------------------------------------------|
| DFT M11; cc-pvdz+d, solvent TFE, SMD model                                                   |
| Total electronic energy= -1532.745575 E <sub>0</sub>                                         |
| Sum of electronic and zero-point Energies= -1532.217401 E <sub>0</sub> + E <sub>ZPE</sub>    |
| Sum of electronic and thermal Energies= -1532.188576 E <sub>0</sub> + E <sub>tot</sub>       |
| Sum of electronic and thermal Enthalpies= -1532.187632 E <sub>0</sub> + H <sub>corr</sub>    |
| Sum of electronic and thermal Free Energies= -1532.273433 E <sub>0</sub> + G <sub>corr</sub> |
| Zero-point correction ( <i>unscaled</i> ) = 0.528174                                         |
| Number of imaginary vibrational frequencies = 1; 577i                                        |

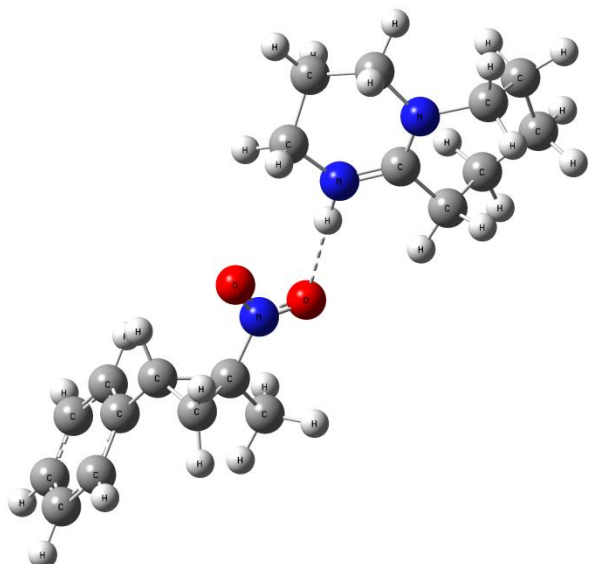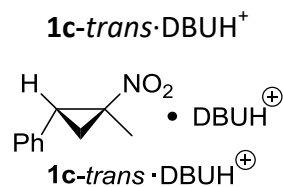

Charge 1; multiplicity 1

C 1.56671000 0.84320400 -0.96972200  
 C 2.88334700 1.21288700 -0.35160600  
 H 2.73948000 1.85850500 0.53257700  
 H 3.48044500 1.76126300 -1.09900100  
 H 3.43852400 0.30866800 -0.04855400  
 C 1.40457600 0.51707200 -2.43526200  
 H 0.73096100 -0.30973200 -2.68350000  
 H 2.33245700 0.58705200 -3.01556200  
 C 0.79597900 1.77254800 -1.90414700  
 H -0.28913400 1.74117500 -1.74027200  
 C 1.37348400 3.12679200 -2.17735600  
 C 1.18118200 4.15414900 -1.24404900  
 H 0.61010100 3.95027900 -0.32782200  
 C 1.71094100 5.42310600 -1.47083800  
 H 1.55677000 6.21937500 -0.73167400  
 C 2.43833000 5.67981900 -2.63595900  
 H 2.85598500 6.67853800 -2.81536300  
 C 2.62934000 4.66232600 -3.57072700  
 H 3.19520500 4.85900800 -4.49015200  
 C 2.10024200 3.39004900 -3.34173100  
 H 2.24798900 2.59393100 -4.08307500  
 N 0.68598100 0.06654100 -0.08413200  
 O -0.39453100 -0.30971100 -0.50080100  
 O 1.08122000 -0.16630900 1.04942200  
 H -0.38664600 -1.31964900 1.70360600  
 N -1.12805600 -1.96270600 1.99370400  
 C -2.47264900 -1.78055800 1.45966600  
 C -0.80159400 -2.92586600 2.83711800  
 H -2.57753300 -2.34726300 0.51498700  
 H -2.60508200 -0.71076400 1.23306600  
 C -3.46778400 -2.26499500 2.50139700  
 N -1.69598700 -3.79975300 3.26988200  
 C 0.61970600 -2.97948500 3.32409800  
 H -3.42863000 -1.59947500 3.38331300  
 H -4.49220500 -2.24120200 2.09588800  
 C -3.11973000 -3.68584100 2.91459100  
 C -1.31909600 -4.91505500 4.15233100  
 C 0.73230900 -2.69989300 4.83408200  
 H 1.19285700 -2.23267700 2.74997200  
 H 1.04191700 -3.97342800 3.08386900

H -3.70099800 -3.98541900 3.80344100  
H -3.34206400 -4.40445800 2.10284900  
H -0.47110500 -5.46474600 3.70303700  
H -2.18193000 -5.60054800 4.15156100  
C -0.98338600 -4.47258900 5.57674100  
C 0.43348200 -3.91394900 5.71530800  
H 0.06554600 -1.85538100 5.09728900  
H 1.76461100 -2.36129800 5.03270200  
H -1.09031500 -5.35093000 6.23915300  
H -1.73496700 -3.72768700 5.90522400  
H 0.61913700 -3.64625900 6.77181600  
H 1.15387200 -4.71763400 5.46006900

|                                                                                              |
|----------------------------------------------------------------------------------------------|
| DFT M11; cc-pvdz+d, solvent TFE, SMD model                                                   |
| Total electronic energy= -1054.842614 E <sub>0</sub>                                         |
| Sum of electronic and zero-point Energies= -1054.389217 E <sub>0</sub> + E <sub>ZPE</sub>    |
| Sum of electronic and thermal Energies= -1054.366067 E <sub>0</sub> + E <sub>tot</sub>       |
| Sum of electronic and thermal Enthalpies= -1054.365123 E <sub>0</sub> + H <sub>corr</sub>    |
| Sum of electronic and thermal Free Energies= -1054.439821 E <sub>0</sub> + G <sub>corr</sub> |
| Zero-point correction ( <i>unscaled</i> ) = 0.453398                                         |
| Number of imaginary vibrational frequencies = 0                                              |

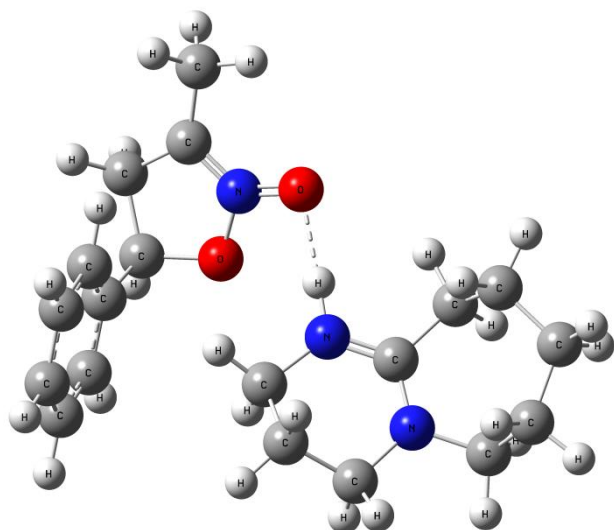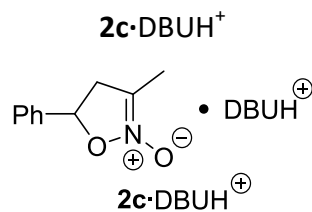

Charge 1; multiplicity 1

C -0.91574000 2.26307500 -2.13643800  
 C -0.89014400 2.58050100 -3.58546600  
 C -0.89366100 3.20528100 -0.97443500  
 O -1.01387100 0.94300400 -0.31524900  
 O -1.02887000 -0.05775700 -2.32019000  
 C -0.60219500 2.25227300 0.19498500  
 H -0.91134500 1.65137800 -4.17564600  
 H -1.76348400 3.20475900 -3.84733900  
 H 0.02115900 3.15588900 -3.82870200  
 H -1.87371800 3.70516900 -0.87073700  
 H -0.11868600 3.98201700 -1.08865800  
 C 0.84778500 2.14279600 0.61276000  
 C 1.14322000 1.81840100 1.93988200  
 C 1.88915900 2.24253800 -0.31843000  
 C 2.45993500 1.57787600 2.33398400  
 H 0.32515400 1.74205400 2.66932100  
 C 3.20589800 2.00049100 0.07424000  
 H 1.68098100 2.50522300 -1.36477500  
 C 3.49270900 1.66186900 1.39859500  
 H 2.68113500 1.32344900 3.37821900  
 H 4.01620600 2.07752300 -0.66154700  
 H 4.52925700 1.47169700 1.70449100  
 H -1.24379800 2.44186000 1.06887800  
 N -0.97934400 1.04444500 -1.71174200  
 H -0.29891200 -1.25936500 -1.18066600  
 N 0.09647900 -1.91773200 -0.48954400  
 C 1.02882800 -1.41992100 0.51425800  
 C -0.28453300 -3.17832700 -0.56199000  
 H 0.46645000 -1.07816700 1.40459100  
 H 1.55466600 -0.54922100 0.08804600  
 C 1.99246400 -2.53896100 0.87392900  
 N 0.17424600 -4.09554700 0.27667200  
 C -1.23813000 -3.55505400 -1.66111400  
 H 2.62981300 -2.76882400 0.00025700  
 H 2.64619600 -2.23065000 1.70653700  
 C 1.20666300 -3.77721100 1.27581300  
 C -0.29163200 -5.48935900 0.22155300  
 C -0.59144900 -4.49212400 -2.69749300  
 H -1.57281400 -2.61814500 -2.13610300  
 H -2.12902200 -4.03371000 -1.21307600  
 H 1.87235000 -4.65451400 1.34593700  
 H 0.71953900 -3.63885700 2.26000700

H -1.39723700 -5.50740800 0.25416200  
H 0.06408600 -5.96018600 1.15224600  
C 0.22563500 -6.25144400 -0.99934700  
C -0.56915200 -5.96205800 -2.27375100  
H 0.43405100 -4.13580700 -2.91834600  
H -1.16682100 -4.40058200 -3.63578800  
H 0.16495900 -7.33232100 -0.77605400  
H 1.29807600 -6.01122900 -1.14057800  
H -0.16280300 -6.56998200 -3.10307400  
H -1.61506200 -6.29682600 -2.11811400

|                                                                                              |
|----------------------------------------------------------------------------------------------|
| DFT M11; cc-pvdz+d, solvent TFE, SMD model                                                   |
| Total electronic energy= -1054.849741 E <sub>0</sub>                                         |
| Sum of electronic and zero-point Energies= -1054.396066 E <sub>0</sub> + E <sub>ZPE</sub>    |
| Sum of electronic and thermal Energies= -1054.373138 E <sub>0</sub> + E <sub>tot</sub>       |
| Sum of electronic and thermal Enthalpies= -1054.372193 E <sub>0</sub> + H <sub>corr</sub>    |
| Sum of electronic and thermal Free Energies= -1054.445278 E <sub>0</sub> + G <sub>corr</sub> |
| Zero-point correction ( <i>unscaled</i> ) = 0.453675                                         |
| Number of imaginary vibrational frequencies = 0                                              |



## 8.8 Calculations in 2,2,2-trifluoroethanol (TFE) with $\text{Et}_3\text{NH}^+$ as HBD

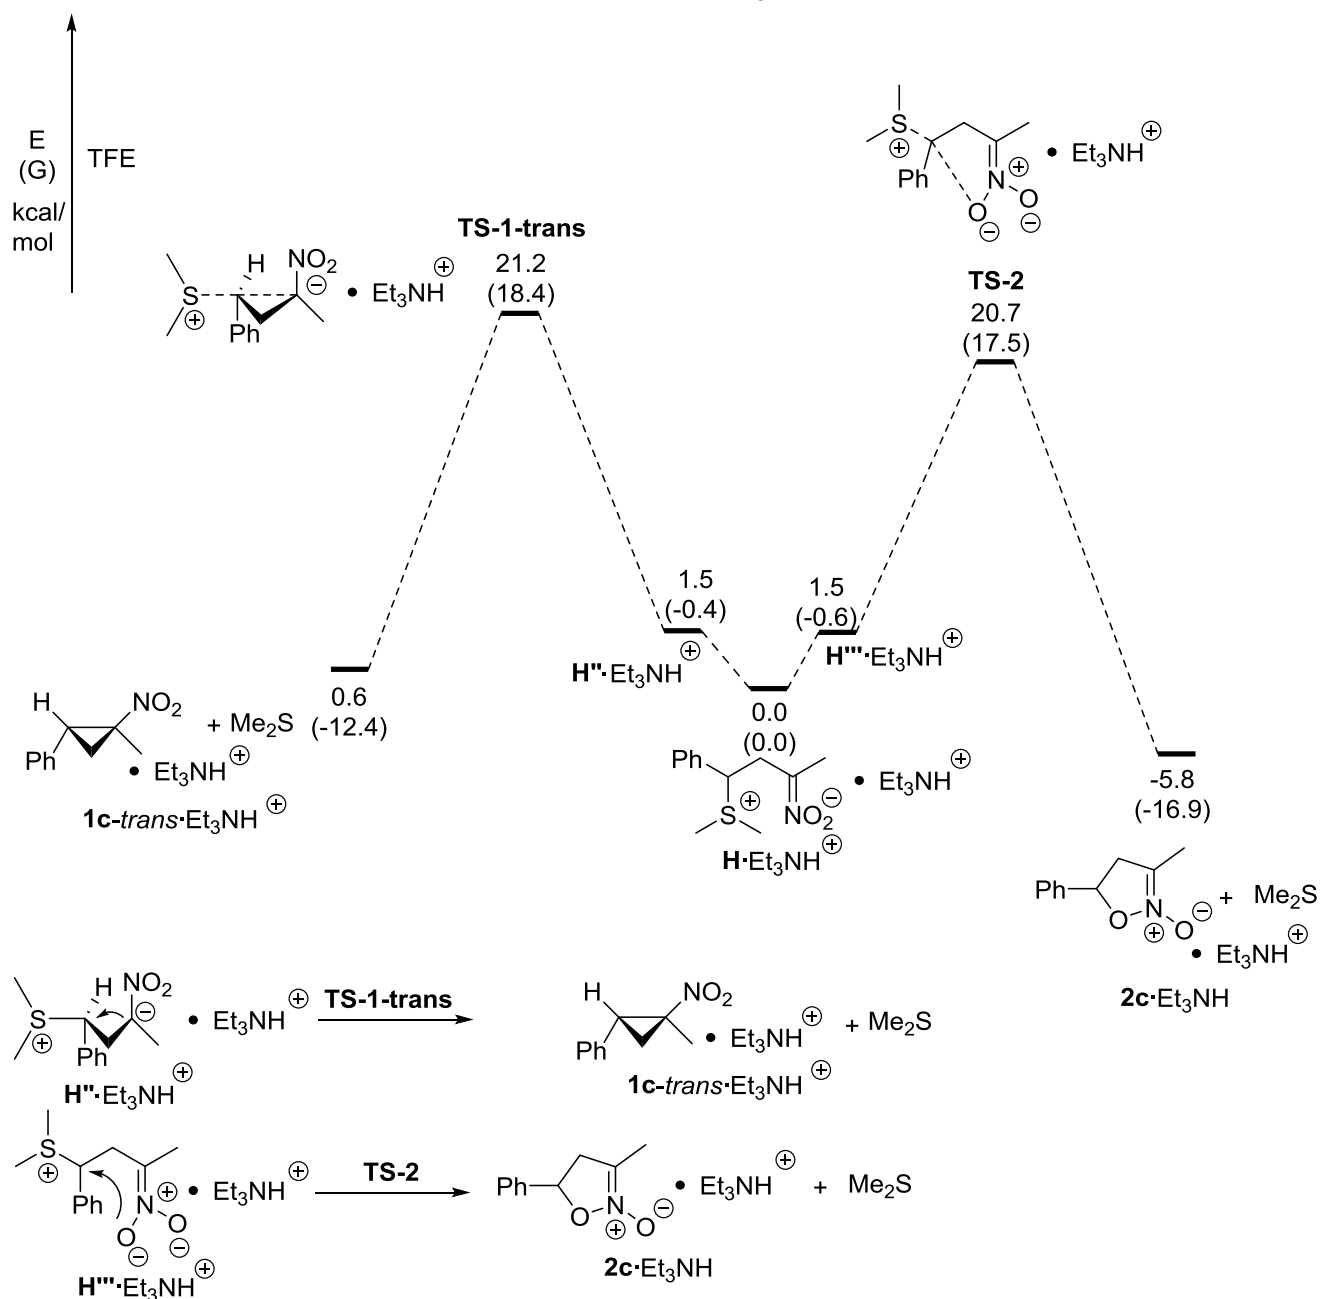

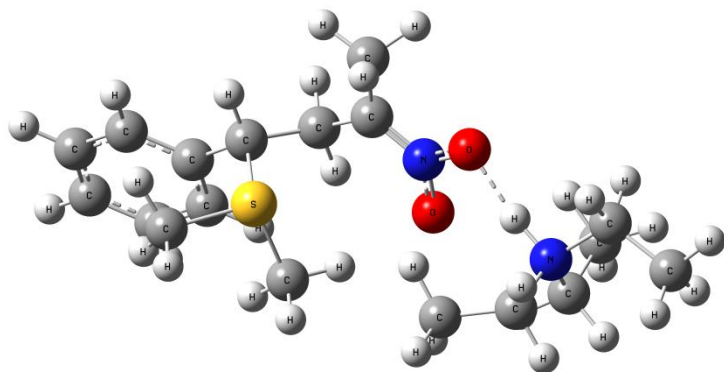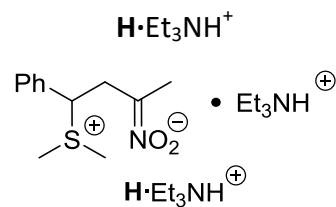

### Charge 1; multiplicity 1

C -4.00451900 4.88301100 -2.08087900  
 C -2.80511500 3.99062900 -2.14684200  
 C -2.68086100 2.74642200 -1.32023700  
 C -2.69599300 3.02858500 0.19313200  
 N -1.83839700 4.31916200 -2.97085500  
 O -0.75488700 3.63352500 -3.12137500  
 S -1.54710900 4.45295200 0.51005300  
 H -3.66428400 3.47974400 0.48208700  
 C -1.36010300 4.44954800 2.29334600  
 C 0.05496400 3.86096800 -0.03003600  
 H -3.73172000 5.90199200 -1.74377600  
 H -4.46911000 4.99064200 -3.07923900  
 H -4.75466800 4.46694400 -1.38639800  
 H -1.76505800 2.21107000 -1.61222600  
 H -2.35587800 4.62380900 2.73529600  
 H -0.69092100 5.29275100 2.53495700  
 H -0.92950200 3.49118000 2.62747700  
 H -0.01302400 3.68616900 -1.12160200  
 H 0.76911500 4.67489200 0.18439900  
 H 0.32656200 2.95058200 0.53023000  
 H -3.54129100 2.07433900 -1.50626800  
 C -2.41354700 1.83835300 1.07635300  
 C -1.42332300 0.90010000 0.75679100  
 C -3.15730200 1.67408300 2.25230200  
 C -1.17616600 -0.17637900 1.60953800  
 H -0.83918200 0.99812000 -0.16696800  
 C -2.91225900 0.59549400 3.10052500  
 H -3.94154100 2.40241800 2.50001000  
 C -1.91691800 -0.32984700 2.78202000  
 H -0.39808400 -0.90488900 1.35036200  
 H -3.50447800 0.47667100 4.01628000  
 H -1.72126000 -1.17899700 3.44872600  
 O -1.96005900 5.40108200 -3.68835100  
 H -0.76938600 7.70962000 -5.44176700  
 C -0.19428500 6.90347900 -5.92935300  
 N 0.36259300 6.07305900 -4.81735900  
 C 0.86716100 7.46663200 -6.85709500  
 H -0.91429300 6.26840700 -6.47274100  
 C 1.13312700 6.89194500 -3.83045500  
 C 1.14958900 4.89462100 -5.28726400  
 H 1.38825300 6.67072400 -7.41799700  
 H 1.61589400 8.06369000 -6.30605200  
 H 0.37959800 8.13112900 -7.59104300  
 C 1.09501000 6.27801600 -2.43951400  
 H 0.67305900 7.89486800 -3.81700500  
 H 2.16733300 6.99275200 -4.20520600

C 0.34196800 4.00930400 -6.22108600  
H 1.43464400 4.33588000 -4.38156400  
H 2.07038600 5.27323100 -5.76564200  
H 1.63490400 6.94151200 -1.74166900  
H 0.04974900 6.17998300 -2.09170300  
H 1.57600800 5.28495500 -2.40825800  
H 0.88125200 3.05814700 -6.37082400  
H -0.64248600 3.78186300 -5.77353900  
H 0.19230500 4.47399100 -7.21148100  
H -0.50998800 5.69991700 -4.31001700

|                                                                                              |
|----------------------------------------------------------------------------------------------|
| DFT M11; cc-pvdz+d, solvent TFE, SMD model                                                   |
| Total electronic energy= -1363.157299 E <sub>0</sub>                                         |
| Sum of electronic and zero-point Energies= -1362.665398 E <sub>0</sub> + E <sub>ZPE</sub>    |
| Sum of electronic and thermal Energies= -1362.638070 E <sub>0</sub> + E <sub>tot</sub>       |
| Sum of electronic and thermal Enthalpies= -1362.637126 E <sub>0</sub> + H <sub>corr</sub>    |
| Sum of electronic and thermal Free Energies= -1362.717621 E <sub>0</sub> + G <sub>corr</sub> |
| Zero-point correction ( <i>unscaled</i> ) = 0.491902                                         |
| Number of imaginary vibrational frequencies = 0                                              |

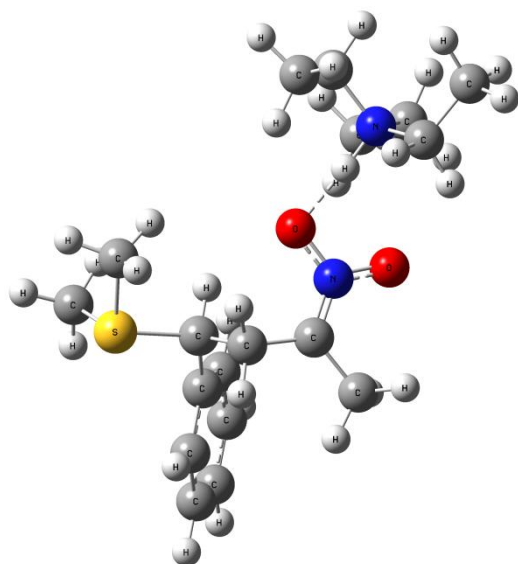

Pre-reaction conformation  $\text{H}'' \cdot \text{Et}_3\text{NH}^+$

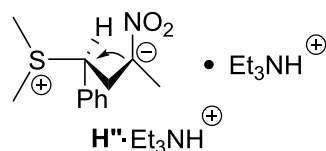

Charge 1; multiplicity 1

C 1.56127500 -0.60901000 -0.01747200  
 C 2.93166300 -0.35690700 0.52387400  
 H 2.92180300 0.48459300 1.24498200  
 H 3.63016300 -0.11686800 -0.29507600  
 H 3.31095200 -1.24106200 1.07149000  
 C 1.17608100 -0.46796600 -1.46076700  
 H 0.50093500 -1.29468700 -1.74294200  
 H 2.07665800 -0.50094000 -2.09856200  
 C 0.45406400 0.88157200 -1.62276200  
 H -0.41626400 0.90412100 -0.94148400  
 C 1.34984400 2.07536500 -1.38244100  
 C 1.06590100 2.93909700 -0.32047200  
 H 0.17955300 2.75639000 0.30256300  
 C 1.91117200 4.01610100 -0.04850200  
 H 1.68741100 4.68581900 0.79109100  
 C 3.03585200 4.23936000 -0.84333100  
 H 3.69915800 5.08708800 -0.63078500  
 C 3.31775600 3.38246100 -1.90987500  
 H 4.20111800 3.55580500 -2.53682400  
 C 2.48011300 2.30094500 -2.17784900  
 H 2.71314600 1.62404300 -3.01241800  
 N 0.61105500 -0.89319300 0.83686900  
 O -0.62600600 -1.06978600 0.42993200  
 O 0.84170600 -1.00246500 2.09551200  
 S -0.28394600 1.01968600 -3.30248300  
 C -1.30650900 2.47874500 -3.08319400  
 H -1.93643900 2.57313700 -3.98323400  
 H -1.91878500 2.35671600 -2.17334300  
 H -0.62980000 3.34556600 -3.00303500  
 C -1.51941800 -0.28573200 -3.24261900  
 H -1.02599000 -1.23319400 -3.51250400  
 H -1.95070500 -0.32782000 -2.22702100  
 H -2.28649200 -0.03769100 -3.99480600  
 N -1.82923700 -2.25894300 2.51536500  
 C -1.78699700 -1.40648200 3.74181400  
 C -2.06948800 0.05250700 3.42091600  
 H -0.77316700 -1.51343500 4.16167700  
 H -2.51375500 -1.81599000 4.46583300  
 H -1.90982800 0.65620100 4.33097500  
 H -1.37382500 0.40916300 2.64044800  
 H -3.10774000 0.21953400 3.08612700

C -3.22777100 -2.46906000 2.03670400  
 C -3.28731700 -3.31201000 0.77329100  
 H -3.64020000 -1.46460100 1.84448700  
 H -3.80615600 -2.92144700 2.86244000  
 H -4.30869400 -3.26132700 0.35870600  
 H -2.58478100 -2.92833800 0.01081300  
 H -3.05412000 -4.37303200 0.96983600  
 H -1.32400100 -1.72285300 1.73493000  
 C -1.04718400 -3.52237300 2.67776200  
 H -0.03572700 -3.20237900 2.97891400  
 C -1.65619200 -4.49328300 3.67299900  
 H -2.64457000 -4.85929000 3.34200700  
 H -1.76094400 -4.04159200 4.67551200  
 H -0.96202500 -3.97372900 1.67422000  
 H -0.98855700 -5.36718400 3.76653200

|                                                                                              |
|----------------------------------------------------------------------------------------------|
| DFT M11; cc-pvdz+d, solvent TFE, SMD model                                                   |
| Total electronic energy= -1363.154892 E <sub>0</sub>                                         |
| Sum of electronic and zero-point Energies= -1362.663710 E <sub>0</sub> + E <sub>ZPE</sub>    |
| Sum of electronic and thermal Energies= -1362.635802 E <sub>0</sub> + E <sub>tot</sub>       |
| Sum of electronic and thermal Enthalpies= -1362.634858 E <sub>0</sub> + H <sub>corr</sub>    |
| Sum of electronic and thermal Free Energies= -1362.718317 E <sub>0</sub> + G <sub>corr</sub> |
| Zero-point correction ( <i>unscaled</i> ) = 0.491183                                         |
| Number of imaginary vibrational frequencies = 0                                              |

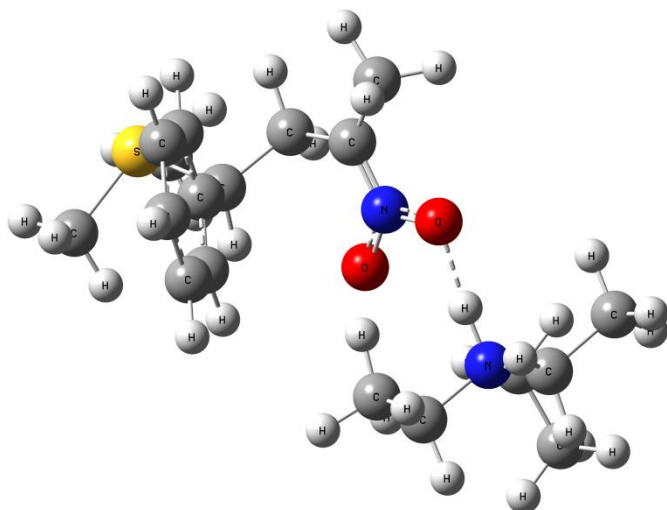

Pre-reaction conformation  $\text{H}^{\bullet\bullet\bullet}\cdot\text{Et}_3\text{NH}^+$

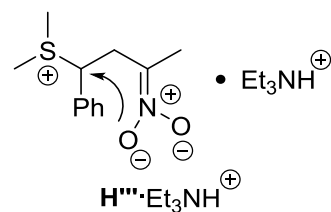

Charge 1; multiplicity 1

C -0.39678000 0.99551800 -1.60518600  
 C 0.31765900 1.13630200 -2.91188900  
 C -0.86404700 2.15325900 -0.77017500  
 O -1.15258700 -0.42268800 0.00875900  
 O -0.19497300 -1.24954300 -1.81637800  
 C -0.17312300 2.17911400 0.61240600  
 S -0.33628400 3.86131100 1.32754900  
 H -0.22741800 0.61908900 -3.72459700  
 H 0.42596900 2.20068400 -3.17836600  
 H 1.32433300 0.67659600 -2.85941600  
 H -1.95754800 2.09562200 -0.60762800  
 H -0.64558900 3.08409200 -1.32533700  
 C 1.29638300 1.82605800 0.56762000  
 C 1.75041000 0.71554200 1.28358600  
 C 2.19303400 2.56519100 -0.21455600  
 C 3.09461000 0.34341400 1.21851700  
 H 1.03634500 0.13134700 1.88057300  
 C 3.53556400 2.19547600 -0.27240300  
 H 1.83918700 3.43378800 -0.78921800  
 C 3.98753300 1.08388500 0.44370100  
 H 3.44595600 -0.53312900 1.77766400  
 H 4.23531400 2.77759400 -0.88480000  
 H 5.04426300 0.79285200 0.39409000  
 C -2.11543200 4.00078600 1.52235700  
 H -2.30074500 4.87920100 2.16294900  
 H -2.55044700 4.16925600 0.52365300  
 H -2.50509100 3.07818800 1.98491300  
 C 0.18362900 3.56493000 3.01884600  
 H -0.36391200 2.69493200 3.41925700  
 H 1.27143600 3.38537100 3.00158400  
 H -0.03898800 4.48040000 3.59242000  
 H -0.70087300 1.51349200 1.31435000  
 N -0.59014700 -0.20727600 -1.13371000  
 H -0.75194400 -2.46265000 -0.92714000  
 N -1.04982300 -3.36994100 -0.43099400  
 C -0.37782300 -3.36612400 0.90252500  
 C 1.08848700 -2.97320000 0.79249800  
 H -0.50073200 -4.36688500 1.35356000  
 H -0.92337200 -2.63138600 1.51798600  
 H 1.48156900 -2.77205300 1.80450000  
 H 1.70657000 -3.77192700 0.34700700  
 H 1.19248700 -2.05765400 0.18272300

C -0.55150700 -4.47226000 -1.30516700  
C -1.20859000 -4.46064700 -2.67589800  
H -0.70835300 -5.42913100 -0.77493700  
H 0.53474500 -4.31179800 -1.40753100  
H -0.66849300 -5.16041100 -3.33639000  
H -2.26488000 -4.77913300 -2.63598700  
H -1.15562400 -3.45180300 -3.12489300  
C -2.53753500 -3.31126800 -0.31404600  
H -2.92739900 -3.08908800 -1.32201800  
C -3.15893400 -4.57734900 0.24929900  
H -2.77000200 -4.81610800 1.25499100  
H -2.99473600 -5.44704800 -0.41183900  
H -4.24845600 -4.42472900 0.33847600  
H -2.75104300 -2.43346900 0.31824000

|                                                                                              |
|----------------------------------------------------------------------------------------------|
| DFT M11; cc-pvdz+d, solvent TFE, SMD model                                                   |
| Total electronic energy= -1363.154972 E <sub>0</sub>                                         |
| Sum of electronic and zero-point Energies= -1362.664320 E <sub>0</sub> + E <sub>ZPE</sub>    |
| Sum of electronic and thermal Energies= -1362.636314 E <sub>0</sub> + E <sub>tot</sub>       |
| Sum of electronic and thermal Enthalpies= -1362.635370 E <sub>0</sub> + H <sub>corr</sub>    |
| Sum of electronic and thermal Free Energies= -1362.718632 E <sub>0</sub> + G <sub>corr</sub> |
| Zero-point correction ( <i>unscaled</i> ) = 0.490653                                         |
| Number of imaginary vibrational frequencies = 0                                              |

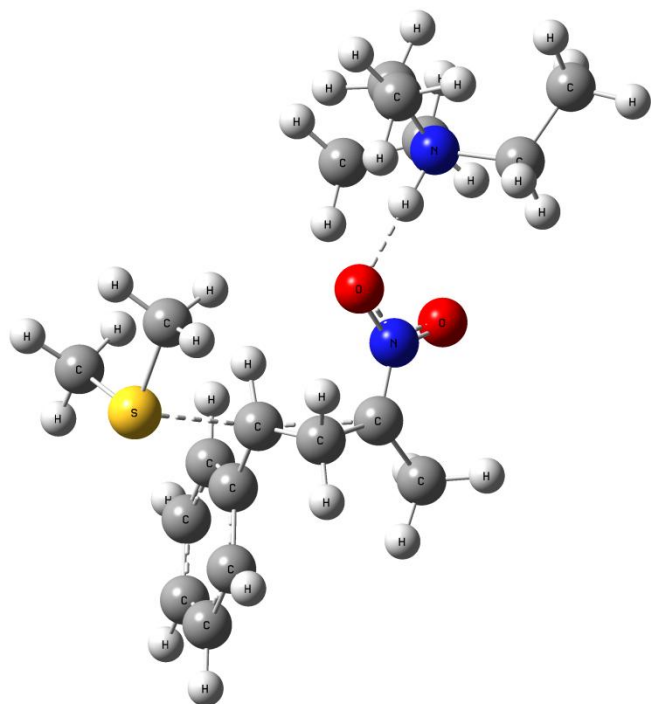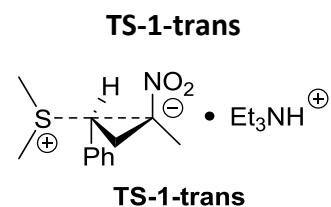

Charge 1; multiplicity 1

C 6.67575500 4.82366800 7.61515300  
 C 7.98839000 5.15661600 8.24417600  
 H 7.88007800 5.95464800 9.00309000  
 H 8.70117700 5.48808800 7.47139000  
 H 8.40695400 4.26764300 8.75335800  
 C 6.38388400 4.85421900 6.13928900  
 H 5.65816400 4.09054000 5.82641100  
 H 7.30144700 4.85406300 5.53490000  
 C 5.80875700 6.18354800 6.40897600  
 H 4.84374600 6.19254800 6.93772300  
 C 6.62489100 7.41151700 6.50612900  
 C 6.23175000 8.40782400 7.41086000  
 H 5.33624500 8.25166600 8.02786400  
 C 6.97933000 9.57806300 7.53361800  
 H 6.67105600 10.35173700 8.24738000  
 C 8.11784400 9.76136200 6.74756200  
 H 8.70583900 10.68304500 6.84101000  
 C 8.50995100 8.77385600 5.83883000  
 H 9.40162200 8.92207900 5.21743200  
 C 7.76890900 7.60182200 5.71745200  
 H 8.07217400 6.83302100 4.99455700  
 N 5.67952900 4.41520700 8.42735700  
 O 4.53484700 4.10990500 7.94517100  
 O 5.86044500 4.34447900 9.67035400  
 S 4.49619800 6.71554300 4.41696300  
 C 3.58581900 8.05420700 5.20638000  
 H 2.64859200 8.24230100 4.65477800  
 H 3.35948900 7.79383900 6.25728800  
 H 4.21883800 8.95720300 5.17062300  
 C 3.33741900 5.36201100 4.68358700  
 H 3.71486500 4.48234500 4.13538900  
 H 3.26283700 5.12752300 5.76272200  
 H 2.34588200 5.63847200 4.28583800  
 N 3.18438700 3.13061800 10.16708800  
 C 3.14669500 4.15701300 11.25651300



C 2.87659000 5.54765500 10.70598100  
 H 4.13255100 4.12681200 11.75004200  
 H 2.37690300 3.84526600 11.98414700  
 H 2.95630400 6.27811500 11.52930200  
 H 3.62795700 5.80808500 9.93845300  
 H 1.86716200 5.64133300 10.27028900  
 C 1.81710000 2.82797100 9.64193600  
 C 1.84804200 1.82565800 8.50044300  
 H 1.40007200 3.78898000 9.29880000  
 H 1.20444800 2.47369100 10.48972400  
 H 0.85014600 1.79131000 8.03098100  
 H 2.58138700 2.12806300 7.73006600  
 H 2.09493000 0.80724900 8.84762500  
 H 3.71919900 3.55546700 9.36485900  
 C 3.96315800 1.91361700 10.56062000  
 H 4.94950500 2.28620000 10.88356000  
 C 3.29020600 1.08997200 11.64332500  
 H 2.33007800 0.66301600 11.30296200  
 H 3.11451600 1.68124600 12.55942100  
 H 4.11728700 1.32486600 9.64056100  
 H 3.95595400 0.25051700 11.90798700

|                                                                                              |
|----------------------------------------------------------------------------------------------|
| DFT M11; cc-pvdz+d, solvent TFE, SMD model                                                   |
| Total electronic energy= -1363.123566 E <sub>0</sub>                                         |
| Sum of electronic and zero-point Energies= -1362.633956 E <sub>0</sub> + E <sub>ZPE</sub>    |
| Sum of electronic and thermal Energies= -1362.605859 E <sub>0</sub> + E <sub>tot</sub>       |
| Sum of electronic and thermal Enthalpies= -1362.604915 E <sub>0</sub> + H <sub>corr</sub>    |
| Sum of electronic and thermal Free Energies= -1362.688358 E <sub>0</sub> + G <sub>corr</sub> |
| Zero-point correction ( <i>unscaled</i> ) = 0.489611                                         |
| Number of imaginary vibrational frequencies = 1; 597i                                        |

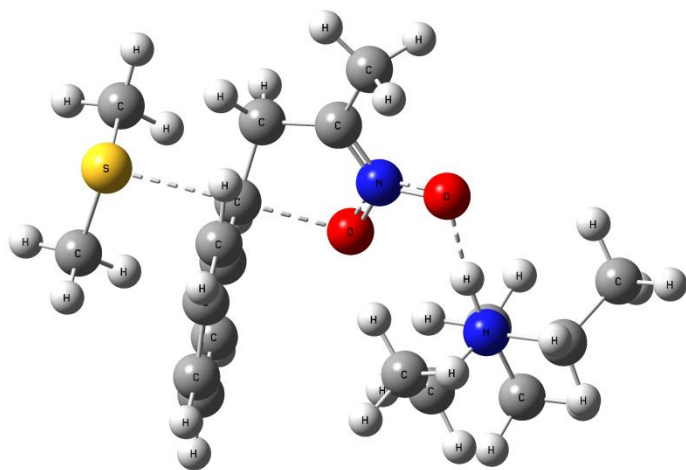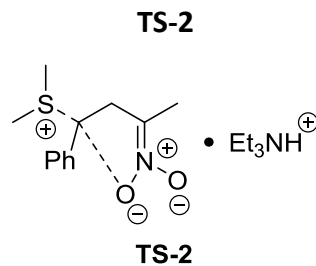

Charge 1; multiplicity 1

C 1.37724100 0.26380500 -1.43366300  
 C 1.70436300 0.46431700 -2.87322400  
 C 1.17726800 1.33822200 -0.40567900  
 O 0.93638200 -1.08748900 0.30708000  
 O 1.33669500 -2.00570900 -1.68854100  
 C 1.47812700 0.78013400 0.97857600  
 S 1.66466900 2.93865800 2.02382000  
 H 0.87141900 0.12313900 -3.51699500  
 H 1.89959500 1.52884300 -3.07924300  
 H 2.59571500 -0.12943000 -3.14911300  
 H 0.13401600 1.70739000 -0.42963600  
 H 1.84084400 2.18763600 -0.64393900  
 C 2.83896800 0.31901200 1.34713700  
 C 3.01042800 -0.40534100 2.53615200  
 C 3.94086300 0.56991400 0.52130300  
 C 4.27374900 -0.85982000 2.90232300  
 H 2.13691700 -0.61392500 3.16916300  
 C 5.20512100 0.10616200 0.88901100  
 H 3.82100300 1.13998400 -0.40934600  
 C 5.37420900 -0.60275500 2.07843000  
 H 4.40347600 -1.42284400 3.83506200  
 H 6.06683900 0.30710500 0.24061400  
 H 6.37054900 -0.96109800 2.36655700  
 C -0.05703600 3.43093400 1.82021500  
 H -0.30546500 4.21072700 2.56041800  
 H -0.17325200 3.84438300 0.80433500  
 H -0.72021300 2.55631500 1.95332800  
 C 1.61151800 2.37402500 3.73154600  
 H 0.88743300 1.54496000 3.83437900  
 H 2.62355700 2.03432200 4.00789200  
 H 1.31839600 3.21600700 4.38184100  
 H 0.66812400 0.62285100 1.69953100  
 N 1.21484200 -0.93663200 -0.97179000  
 H 1.17764700 -3.19966000 -0.57444800  
 N 1.12098000 -4.06541400 0.04494900  
 C 2.23292900 -3.96220000 1.04116600  
 C 3.50623400 -3.40916200 0.41990800  
 H 2.39263800 -4.96732700 1.47063600  
 H 1.87692300 -3.29178900 1.84306700  
 H 4.29361900 -3.38079400 1.19252500  
 H 3.87624900 -4.03804000 -0.40848800  
 H 3.34607200 -2.38182400 0.04421200  
 C 1.31274900 -5.22235700 -0.88174900

C 0.22579900 -5.29163400 -1.94164300  
 H 1.35929900 -6.14195700 -0.27173600  
 H 2.29787800 -5.07761900 -1.35500800  
 H 0.52126800 -6.02885500 -2.70756900  
 H -0.74510100 -5.60886400 -1.52279300  
 H 0.09878100 -4.31144600 -2.43713600  
 C -0.22662800 -4.03180600 0.69241200  
 H -0.96515200 -3.88510800 -0.11389700  
 C -0.53654900 -5.27301400 1.50990900  
 H 0.21749800 -5.44320200 2.29909800  
 H -0.60399300 -6.17776500 0.87999500  
 H -1.51390300 -5.13360100 2.00330600  
 H -0.23419300 -3.12232200 1.31523000

|                                                                                              |
|----------------------------------------------------------------------------------------------|
| DFT M11; cc-pvdz+d, solvent TFE, SMD model                                                   |
| Total electronic energy= -1363.124293 E <sub>0</sub>                                         |
| Sum of electronic and zero-point Energies= -1362.635469 E <sub>0</sub> + E <sub>ZPE</sub>    |
| Sum of electronic and thermal Energies= -1362.607322 E <sub>0</sub> + E <sub>tot</sub>       |
| Sum of electronic and thermal Enthalpies= -1362.606377 E <sub>0</sub> + H <sub>corr</sub>    |
| Sum of electronic and thermal Free Energies= -1362.689736 E <sub>0</sub> + G <sub>corr</sub> |
| Zero-point correction ( <i>unscaled</i> ) = 0.488824                                         |
| Number of imaginary vibrational frequencies = 1; 581i                                        |

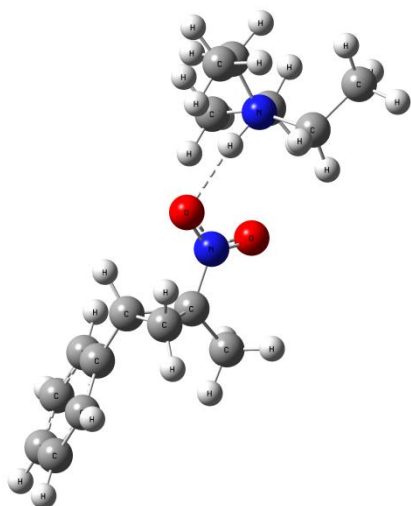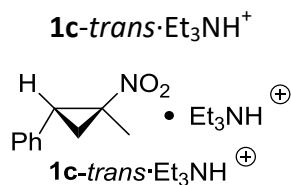

Charge 1; multiplicity 1

C 1.46966500 -0.14525900 0.12639500  
 C 2.75350000 0.05087300 0.87901400  
 H 2.60669200 0.71879700 1.74601000  
 H 3.49384900 0.50633300 0.20071500  
 H 3.14690500 -0.91675100 1.23479400  
 C 1.41394900 -0.44985400 -1.35211900  
 H 0.66540000 -1.18012000 -1.67652800  
 H 2.39749100 -0.50860000 -1.83361300  
 C 0.92569000 0.87615300 -0.87206800  
 H -0.16511500 0.98894900 -0.81949900  
 C 1.69888400 2.14404800 -1.06352600  
 C 1.52856300 3.19103000 -0.14779400  
 H 0.83166000 3.06459100 0.69216600  
 C 2.23583900 4.38252000 -0.29688400  
 H 2.09611300 5.19477000 0.42759100  
 C 3.12216600 4.54100000 -1.36540200  
 H 3.67975200 5.47859900 -1.48380200  
 C 3.29259400 3.50405200 -2.28255500  
 H 3.98328900 3.62398500 -3.12678000  
 C 2.58470200 2.30938500 -2.13171900  
 H 2.71765100 1.49956300 -2.86081400  
 N 0.41465400 -0.79213900 0.91660100  
 O -0.66275000 -1.03347900 0.38202400  
 O 0.64534700 -1.05777000 2.08042000  
 N -2.00394000 -2.47274000 2.58065700  
 C -1.85564500 -1.68764800 3.85040100  
 C -2.21111900 -0.22500500 3.64558900  
 H -0.80220600 -1.79187100 4.15905800  
 H -2.49737000 -2.16613100 4.61008000  
 H -1.95183500 0.33397000 4.56093100  
 H -1.63245900 0.20435000 2.80601200  
 H -3.28684100 -0.07398200 3.45352800  
 C -3.44354700 -2.69950200 2.23277800  
 C -3.60560300 -3.43011200 0.91203100  
 H -3.90723300 -1.70114800 2.18317600  
 H -3.89929600 -3.24853500 3.07492700  
 H -4.66910100 -3.40009300 0.62016900  
 H -3.01768100 -2.93812300 0.11453700  
 H -3.30179900 -4.48909800 0.98010100  
 H -1.60418400 -1.88862400 1.82050300  
 C -1.17802300 -3.72659200 2.58914400  
 H -0.15255100 -3.40353700 2.83651300

C -1.68579600 -4.77159900 3.56498500  
H -2.68123900 -5.15530100 3.27985600  
H -1.73204600 -4.38279200 4.59755000  
H -1.16962700 -4.10820500 1.55442500  
H -0.98288700 -5.62224500 3.55699300

|                                                                             |
|-----------------------------------------------------------------------------|
| DFT M11; cc-pvdz+d, solvent TFE, SMD model                                  |
| Total electronic energy= -885.216356 $E_0$                                  |
| Sum of electronic and zero-point Energies= -884.802122 $E_0$ + $E_{ZPE}$    |
| Sum of electronic and thermal Energies= -884.779696 $E_0$ + $E_{tot}$       |
| Sum of electronic and thermal Enthalpies= -884.778751 $E_0$ + $H_{corr}$    |
| Sum of electronic and thermal Free Energies= -884.850818 $E_0$ + $G_{corr}$ |
| Zero-point correction ( <i>unscaled</i> ) = 0.414234                        |
| Number of imaginary vibrational frequencies = 0                             |

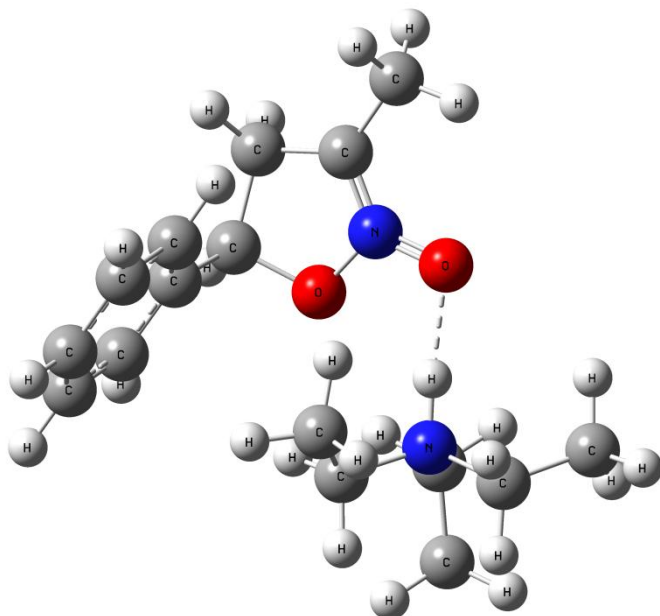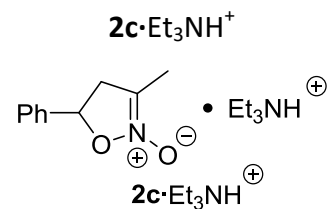

Charge 1; multiplicity 1

C -0.52072800 1.21543400 -2.20974100  
 C -0.37096700 1.57707700 -3.64054600  
 C -0.54384500 2.11793800 -1.01579800  
 O -0.82359200 -0.15152200 -0.44829900  
 O -0.75247600 -1.09215000 -2.47737900  
 C -0.37890300 1.11636700 0.13723900  
 H -1.18110200 2.26740000 -3.93679500  
 H 0.59069900 2.09810600 -3.79652600  
 H -0.40900900 0.67232200 -4.26651500  
 H -1.50985700 2.65237700 -0.96716900  
 H 0.26496900 2.86689200 -1.04655700  
 C 1.03234100 0.92781400 0.65198900  
 C 1.21355700 0.49972800 1.97142700  
 C 2.15068900 1.09911000 -0.17276300  
 C 2.49379300 0.24678500 2.46509700  
 H 0.33626000 0.36925000 2.62012700  
 C 3.43106300 0.84261200 0.31902500  
 H 2.03337900 1.43806500 -1.21130400  
 C 3.60500600 0.41711300 1.63736800  
 H 2.62464800 -0.08141400 3.50391300  
 H 4.30197700 0.98075800 -0.33383700  
 H 4.61367100 0.22237500 2.02318500  
 H -1.07161900 1.30988200 0.97025800  
 N -0.68267800 -0.00813000 -1.83186400  
 H -0.72472600 -2.34841100 -1.27799900  
 N -0.75806500 -3.15310600 -0.60239600  
 C 0.31911400 -2.91516500 0.41044500  
 C 1.62645100 -2.50592300 -0.24997600  
 H 0.43078800 -3.83784700 1.00614100  
 H -0.05089200 -2.11121100 1.06907900  
 H 2.30933100 -2.10961100 0.52241700  
 H 2.13106700 -3.35383600 -0.74400100  
 H 1.45263500 -1.70990700 -0.99789800  
 C -0.49623900 -4.37878400 -1.41975900  
 C -1.54837500 -4.58522300 -2.49574000  
 H -0.43389500 -5.23513600 -0.72515300  
 H 0.49590800 -4.23463800 -1.87769400  
 H -1.20678400 -5.38350000 -3.17643400

H -2.52166900 -4.89159700 -2.07476800  
H -1.68937300 -3.66354000 -3.09047100  
C -2.12793700 -3.10770400 0.00333000  
H -2.84295600 -3.03989100 -0.83398100  
C -2.43424300 -4.29184900 0.90222700  
H -1.70793900 -4.38097500 1.72923100  
H -2.45685600 -5.24259800 0.34090000  
H -3.43290500 -4.14074500 1.34699200  
H -2.17547600 -2.15566300 0.55870500

|                                                                                             |
|---------------------------------------------------------------------------------------------|
| DFT M11; cc-pvdz+d, solvent TFE, SMD model                                                  |
| Total electronic energy= -885.226672 E <sub>0</sub>                                         |
| Sum of electronic and zero-point Energies= -884.811648 E <sub>0</sub> + E <sub>ZPE</sub>    |
| Sum of electronic and thermal Energies= -884.789681 E <sub>0</sub> + E <sub>tot</sub>       |
| Sum of electronic and thermal Enthalpies= -884.788737 E <sub>0</sub> + H <sub>corr</sub>    |
| Sum of electronic and thermal Free Energies= -884.857987 E <sub>0</sub> + G <sub>corr</sub> |
| Zero-point correction ( <i>unscaled</i> ) = 0.415025                                        |
| Number of imaginary vibrational frequencies = 0                                             |

### 8.9 Calculations in 2,2,2-trifluoroethanol (TFE) with 2,2,2-trifluoroethanol (TFE) as HBD

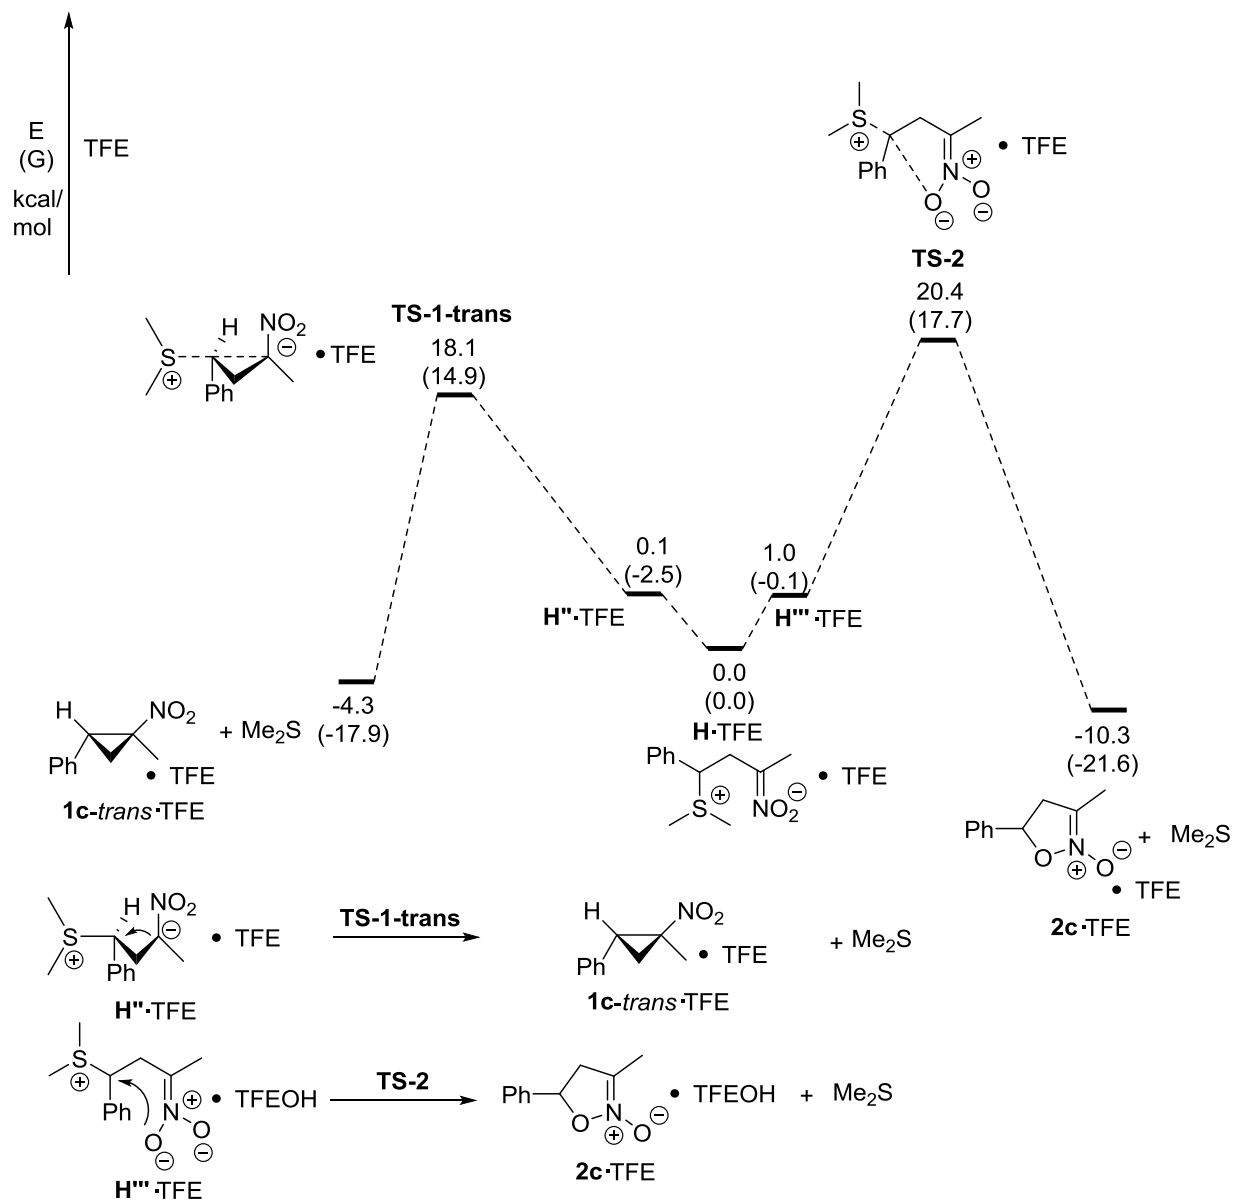



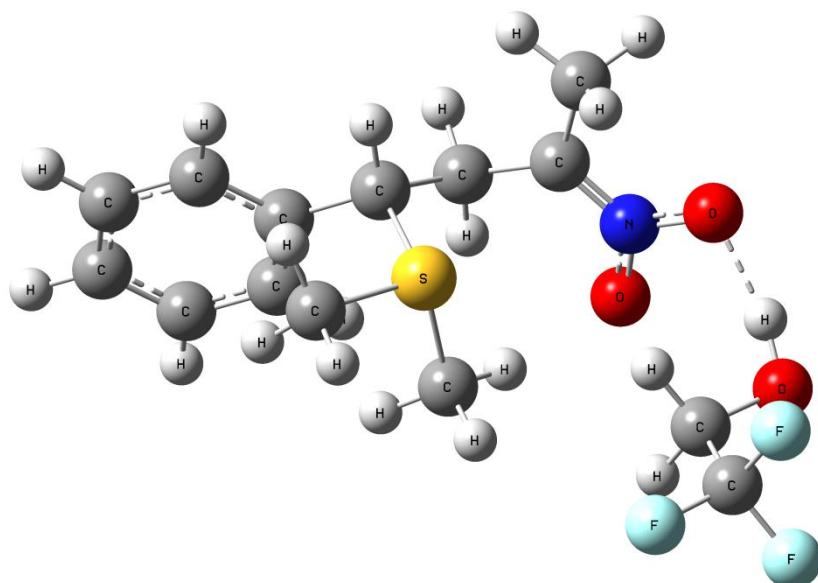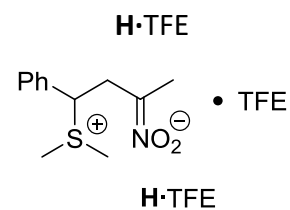

Charge 0; multiplicity 1

C -3.76503900 5.71160600 -1.53931200  
 C -2.95822300 4.55762600 -2.04643200  
 C -3.02515200 3.19316700 -1.42902800  
 C -2.59191500 3.18271900 0.04885000  
 N -2.16133400 4.76683700 -3.07162200  
 O -1.41726200 3.85520700 -3.59664000  
 S -1.05956100 4.22131500 0.19104900  
 H -3.30040900 3.77979700 0.65368800  
 C -0.45517300 3.84348000 1.83667200  
 C 0.14554400 3.38369600 -0.83792000  
 H -3.11460900 6.53752200 -1.19042200  
 H -4.40575700 6.12813800 -2.33972400  
 H -4.41192000 5.39124800 -0.70405500  
 H -2.40841800 2.50220700 -2.02244100  
 H -1.21700700 4.17825300 2.56081400  
 H 0.46950900 4.43056300 1.96874500  
 H -0.25535000 2.76280600 1.92665100  
 H -0.25134200 3.38026600 -1.87268100  
 H 1.06697300 3.99018900 -0.78463800  
 H 0.32459100 2.36675200 -0.45015800  
 H -4.06496300 2.81152300 -1.43659400  
 C -2.43288600 1.81716100 0.66953300  
 C -1.82617100 0.75879300 -0.01953600  
 C -2.89472100 1.60826900 1.97557000  
 C -1.67986200 -0.48500000 0.59559400  
 H -1.46659600 0.89534100 -1.04723600  
 C -2.75120500 0.36391800 2.58696500  
 H -3.37680400 2.43547100 2.51437000  
 C -2.13979900 -0.68477400 1.89786900  
 H -1.20404600 -1.30758700 0.04757800  
 H -3.12130300 0.21242800 3.60853100  
 H -2.02537800 -1.66520400 2.37698100  
 O -2.10402400 5.95867400 -3.59130700  
 H -0.66972000 6.04271600 -4.37228500  
 O 0.30860000 6.09771100 -4.57778400  
 C 0.93699700 5.74258500 -3.37766300  
 C 2.05117700 6.71760800 -3.09818500  
 H 1.38971500 4.72946900 -3.40358100  
 H 0.24384200 5.79892600 -2.51453600

F 2.70484400 6.39811500 -1.95346600  
F 2.97248300 6.73940900 -4.08848200  
F 1.60249900 7.98534600 -2.96006800

|                                                                                              |
|----------------------------------------------------------------------------------------------|
| DFT M11; cc-pvdz+d, solvent TFE, SMD model                                                   |
| Total electronic energy= -1523.102948 E <sub>0</sub>                                         |
| Sum of electronic and zero-point Energies= -1522.772579 E <sub>0</sub> + E <sub>ZPE</sub>    |
| Sum of electronic and thermal Energies= -1522.748999 E <sub>0</sub> + E <sub>tot</sub>       |
| Sum of electronic and thermal Enthalpies= -1522.748054 E <sub>0</sub> + H <sub>corr</sub>    |
| Sum of electronic and thermal Free Energies= -1522.822011 E <sub>0</sub> + G <sub>corr</sub> |
| Zero-point correction ( <i>unscaled</i> ) = 0.330370                                         |
| Number of imaginary vibrational frequencies = 0                                              |

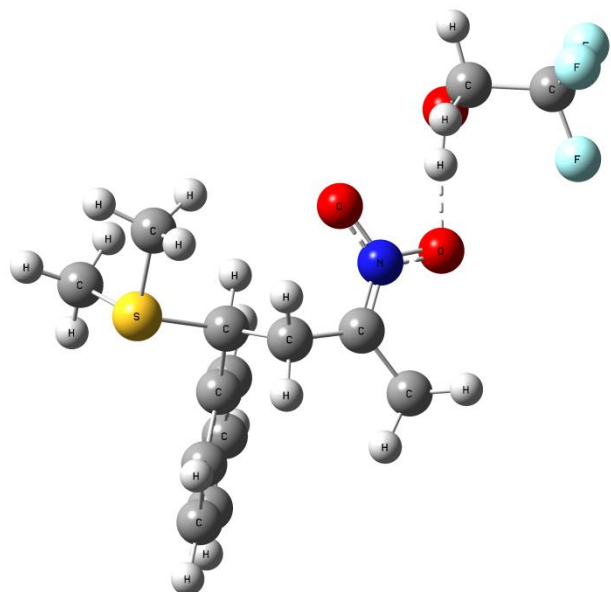

Pre-reaction conformation  $H'' \cdot TFE$

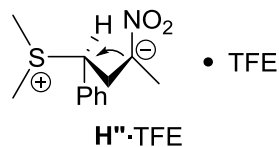

Charge 0; multiplicity 1

C 1.12971500 -0.51503600 -0.40717100  
 C 2.54599600 -0.42756800 0.06379500  
 H 2.65923100 0.36085100 0.83368300  
 H 3.21601500 -0.19700700 -0.78191400  
 H 2.87587800 -1.37668400 0.52905900  
 C 0.68253700 -0.29522500 -1.82132500  
 H -0.09595700 -1.03613800 -2.07700000  
 H 1.53237300 -0.40526900 -2.51685000  
 C 0.10189800 1.12791300 -1.90190900  
 H -0.66611700 1.24081000 -1.11427800  
 C 1.14648700 2.21466300 -1.79359800  
 C 1.09092300 3.11386900 -0.72482400  
 H 0.27436200 3.03384700 0.00559200  
 C 2.07211700 4.09678300 -0.58399800  
 H 2.02682800 4.79456300 0.26138400  
 C 3.10524100 4.19097900 -1.51673000  
 H 3.87495800 4.96529800 -1.40771600  
 C 3.15965200 3.29829600 -2.58988900  
 H 3.97058300 3.37011100 -3.32527800  
 C 2.18617100 2.31016100 -2.72715000  
 H 2.23968400 1.60442500 -3.56856600  
 N 0.18430800 -0.71712800 0.47917500  
 O -1.06410200 -0.74405400 0.15498200  
 O 0.49605400 -0.89616500 1.72920500  
 S -0.83140800 1.35998500 -3.47136600  
 C -1.67256200 2.90535100 -3.11641500  
 H -2.39492700 3.07826500 -3.93141700  
 H -2.17877600 2.82289300 -2.13959500  
 H -0.91012700 3.70225700 -3.11158800  
 C -2.16688800 0.17398900 -3.25259300  
 H -1.82068200 -0.80004200 -3.63354600  
 H -2.42855400 0.11732600 -2.18135800  
 H -3.01704600 0.53088500 -3.85757600  
 H -0.87836000 -0.86351700 2.57519400  
 O -1.73981900 -1.05357400 3.05641700  
 C -2.05056900 -2.37549400 2.71474400  
 C -1.36271200 -3.32668700 3.66633200  
 H -1.72379900 -2.63147200 1.68750000  
 H -3.13781100 -2.55877700 2.80308500  
 F -1.62302900 -4.62118900 3.36506200

F -1.75178400 -3.13246500 4.94904600  
F -0.01729300 -3.17591400 3.64853400

|                                                                                              |
|----------------------------------------------------------------------------------------------|
| DFT M11; cc-pvdz+d, solvent TFE, SMD model                                                   |
| Total electronic energy= -1523.102787 E <sub>0</sub>                                         |
| Sum of electronic and zero-point Energies= -1522.773245 E <sub>0</sub> + E <sub>ZPE</sub>    |
| Sum of electronic and thermal Energies= -1522.749011 E <sub>0</sub> + E <sub>tot</sub>       |
| Sum of electronic and thermal Enthalpies= -1522.748067 E <sub>0</sub> + H <sub>corr</sub>    |
| Sum of electronic and thermal Free Energies= -1522.826007 E <sub>0</sub> + G <sub>corr</sub> |
| Zero-point correction ( <i>unscaled</i> ) = 0.329542                                         |
| Number of imaginary vibrational frequencies = 0                                              |

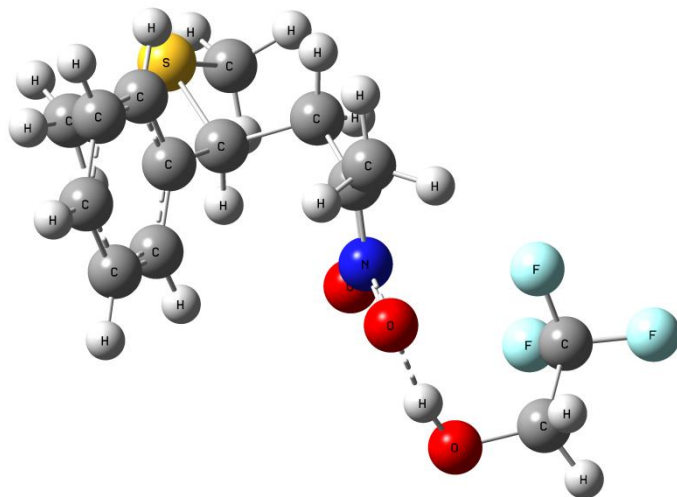

Pre-reaction conformation H'''·TFE

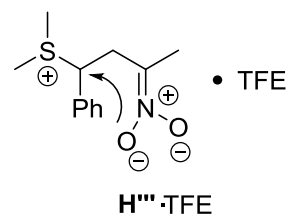

Charge 0; multiplicity 1

C -0.67325800 0.08007700 -1.05427900  
 C -0.52936400 0.14275000 -2.54160400  
 C -1.18807100 1.21158500 -0.21213900  
 O -0.17546600 -1.04395800 0.86030400  
 O 0.40976300 -1.90437900 -1.09588300  
 C 0.00886600 1.85274500 0.52514400  
 S -0.51052700 3.36822000 1.40807100  
 H 0.54070400 0.18737800 -2.83502700  
 H -0.95512200 -0.75871000 -3.02134100  
 H -1.04090200 1.03474100 -2.94106700  
 H -1.91385900 0.83896800 0.53406800  
 H -1.68169200 1.95634000 -0.86250400  
 C 1.15233800 2.17107400 -0.41214500  
 C 2.24402100 1.29622600 -0.43419600  
 C 1.08745700 3.22577800 -1.32864800  
 C 3.26744500 1.47913400 -1.36370900  
 H 2.26675600 0.44745800 0.26506000  
 C 2.11812900 3.41216400 -2.25084600  
 H 0.22196100 3.90403600 -1.33788000  
 C 3.20768700 2.53983200 -2.27003900  
 H 4.11715400 0.78532400 -1.38203900  
 H 2.06449200 4.24248700 -2.96594900  
 H 4.01386600 2.68477600 -3.00005400  
 C -1.64665900 2.69726800 2.62621300  
 H -1.79458600 3.47986700 3.38914500  
 H -2.60090200 2.48495200 2.11726800  
 H -1.20920500 1.78527300 3.06714900  
 C 0.94243200 3.67759700 2.41510000  
 H 1.21620800 2.75041500 2.94648500  
 H 1.74714500 4.00772300 1.73728500  
 H 0.68598300 4.48628300 3.11946800  
 H 0.34692700 1.15776500 1.31356700  
 N -0.15828300 -0.94525800 -0.42279100  
 C -0.76792800 -4.58760800 0.06478800  
 O 0.37962700 -3.94153900 0.53339200  
 H 0.48726700 -3.11454100 -0.02625200  
 H -0.80552700 -4.68469200 -1.04016600  
 H -0.83226800 -5.59885000 0.50656400  
 C -2.03353700 -3.85909800 0.47691100  
 F -3.12703800 -4.63899200 0.28336200  
 F -2.02061000 -3.50732300 1.78110800  
 F -2.24484800 -2.72374800 -0.23144400

|                                                                              |
|------------------------------------------------------------------------------|
| DFT M11; cc-pvdz+d, solvent TFE, SMD model                                   |
| Total electronic energy= -1523.101408 $E_0$                                  |
| Sum of electronic and zero-point Energies= -1522.771753 $E_0$ + $E_{ZPE}$    |
| Sum of electronic and thermal Energies= -1522.747748 $E_0$ + $E_{tot}$       |
| Sum of electronic and thermal Enthalpies= -1522.746804 $E_0$ + $H_{corr}$    |
| Sum of electronic and thermal Free Energies= -1522.822172 $E_0$ + $G_{corr}$ |
| Zero-point correction ( <i>unscaled</i> ) = 0.329655                         |
| Number of imaginary vibrational frequencies = 0                              |

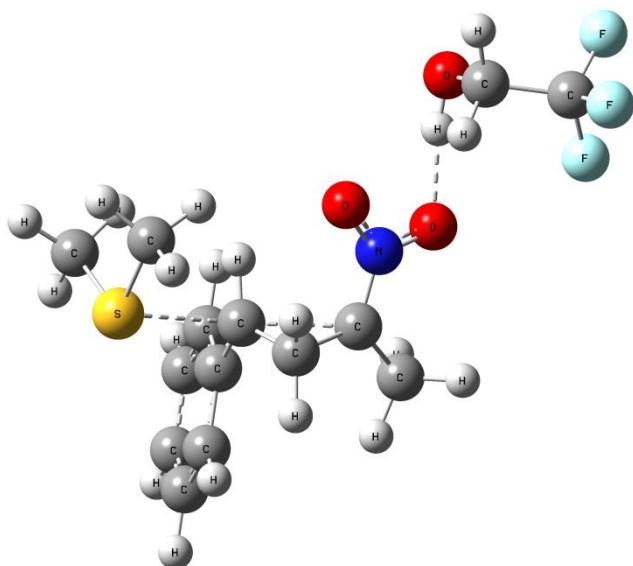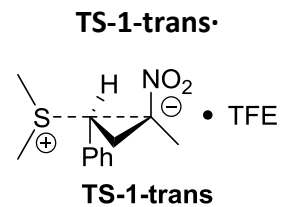

Charge 0; multiplicity 1

C 6.54561800 4.51737400 7.18469600  
 C 7.92269400 4.70954800 7.72921300  
 H 7.95641800 5.54380000 8.45530500  
 H 8.62430000 4.92227000 6.90565700  
 H 8.26278800 3.79710200 8.25526200  
 C 6.17852100 4.50417000 5.72682400  
 H 5.34830700 3.82038800 5.49915200  
 H 7.05208700 4.35444000 5.07719800  
 C 5.78315200 5.90917400 5.93537600  
 H 4.86831100 6.06629900 6.52686000  
 C 6.75392000 7.02623000 5.91268000  
 C 6.57163700 8.09202800 6.80438000  
 H 5.72262400 8.07095600 7.50138700  
 C 7.46857100 9.15951200 6.81455000  
 H 7.32530500 9.98720200 7.51998600  
 C 8.54636200 9.17090400 5.92804700  
 H 9.25160200 10.01155300 5.93300400  
 C 8.72758300 8.11405100 5.03105700  
 H 9.57140100 8.12683800 4.33019500  
 C 7.83732500 7.04356900 5.02256600  
 H 7.97547000 6.22108500 4.30830700  
 N 5.54305000 4.28094900 8.05866400  
 O 4.35672600 4.10971300 7.66609500  
 O 5.80838800 4.24210000 9.30122100  
 S 4.44285200 6.48792700 4.01354100  
 C 3.75856200 7.97511300 4.76424000  
 H 2.82364500 8.25428500 4.24871400  
 H 3.56042700 7.80138200 5.83827200  
 H 4.49931000 8.78389300 4.64321700  
 C 3.13973100 5.31203400 4.41952900  
 H 3.36181800 4.36857100 3.89291600  
 H 3.10961600 5.13424000 5.51166400  
 H 2.16835600 5.70211200 4.07037000  
 H 4.32920300 4.11516100 10.12879400  
 O 3.47732100 3.81392900 10.53534800  
 C 3.37441900 2.45187700 10.21834300  
 C 4.16826100 1.63384600 11.21066400  
 H 3.75972200 2.21844800 9.20599600  
 H 2.32213200 2.12146300 10.28820100  
 F 4.11698300 0.31111000 10.92945100

F 3.71501600 1.78981300 12.47634200  
F 5.47441400 1.99024300 11.22446000

|                                                                                              |
|----------------------------------------------------------------------------------------------|
| DFT M11; cc-pvdz+d, solvent TFE, SMD model                                                   |
| Total electronic energy= -1523.074169 E <sub>0</sub>                                         |
| Sum of electronic and zero-point Energies= -1522.746365 E <sub>0</sub> + E <sub>ZPE</sub>    |
| Sum of electronic and thermal Energies= -1522.722086 E <sub>0</sub> + E <sub>tot</sub>       |
| Sum of electronic and thermal Enthalpies= -1522.721142 E <sub>0</sub> + H <sub>corr</sub>    |
| Sum of electronic and thermal Free Energies= -1522.798326 E <sub>0</sub> + G <sub>corr</sub> |
| Zero-point correction ( <i>unscaled</i> ) = 0.327804                                         |
| Number of imaginary vibrational frequencies = 1; 602i                                        |



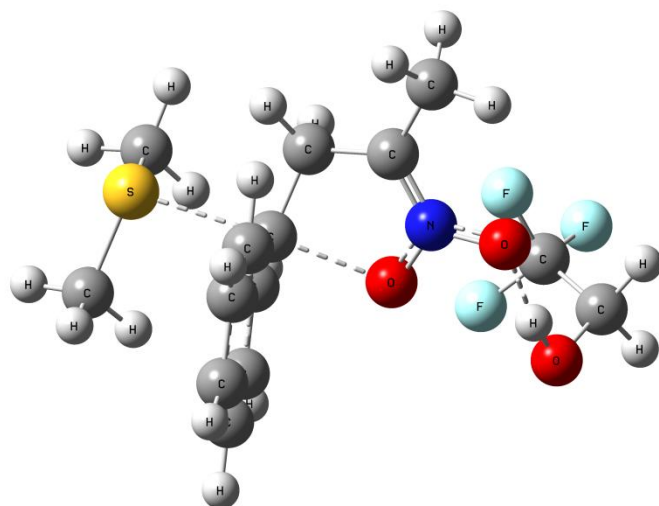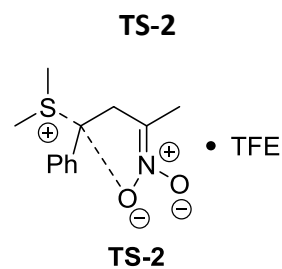

Charge 0; multiplicity 1

C 1.10259800 -0.18896600 -0.48973400  
 C 0.32166500 -0.17513700 -1.75643900  
 C 0.96249500 0.82918200 0.60436700  
 O 2.57114400 -1.06273600 0.95101600  
 O 2.21267300 -2.14921500 -0.95501100  
 C 2.27432600 0.92833800 1.36998800  
 S 1.83181500 3.04233600 2.34114600  
 H 0.63873600 -1.00819000 -2.40160300  
 H -0.76120500 -0.27459800 -1.55020800  
 H 0.47095900 0.77957600 -2.29469100  
 H 0.16117900 0.52862200 1.30785700  
 H 0.67792700 1.79862000 0.15925100  
 C 3.53108000 1.32908000 0.68418300  
 C 4.76064000 1.02218600 1.28287700  
 C 3.50493500 1.98594400 -0.55106700  
 C 5.95167900 1.37703500 0.65629400  
 H 4.77152500 0.48332400 2.23995000  
 C 4.70115300 2.33820500 -1.17781700  
 H 2.54669200 2.23694500 -1.02593100  
 C 5.92311400 2.03711900 -0.57576700  
 H 6.91128800 1.13216300 1.12822700  
 H 4.67625900 2.85355600 -2.14586500  
 H 6.86190500 2.31503200 -1.07126100  
 C 0.52876700 2.49212500 3.45679200  
 H 0.42777200 3.21197400 4.28706300  
 H -0.41390600 2.46098600 2.88498800  
 H 0.76783400 1.48733400 3.85133100  
 C 3.22466800 3.05413400 3.47997600  
 H 3.38882100 2.03962000 3.88810500  
 H 4.11425500 3.38735600 2.91966600  
 H 3.01872400 3.76461000 4.29866200  
 H 2.34049600 0.57373800 2.40442500  
 N 1.94479600 -1.13615500 -0.20204100  
 C 1.86730200 -4.65216900 0.94971300  
 O 3.06983100 -3.96995600 0.73809200  
 H 2.87526800 -3.23958000 0.08728600  
 H 1.31281800 -4.87793100 0.01585900  
 H 2.06979600 -5.60219600 1.47690900  
 C 0.92156400 -3.86552800 1.83833800  
 F -0.08203200 -4.65386400 2.29643100  
 F 1.54787000 -3.34644900 2.91623900  
 F 0.32853300 -2.82897500 1.19627800

|                                                                              |
|------------------------------------------------------------------------------|
| DFT M11; cc-pvdz+d, solvent TFE, SMD model                                   |
| Total electronic energy= -1523.070472 $E_0$                                  |
| Sum of electronic and zero-point Energies= -1522.742944 $E_0$ + $E_{ZPE}$    |
| Sum of electronic and thermal Energies= -1522.718650 $E_0$ + $E_{tot}$       |
| Sum of electronic and thermal Enthalpies= -1522.717706 $E_0$ + $H_{corr}$    |
| Sum of electronic and thermal Free Energies= -1522.793838 $E_0$ + $G_{corr}$ |
| Zero-point correction ( <i>unscaled</i> ) = 0.327529                         |
| Number of imaginary vibrational frequencies = 1; 582 <i>i</i>                |

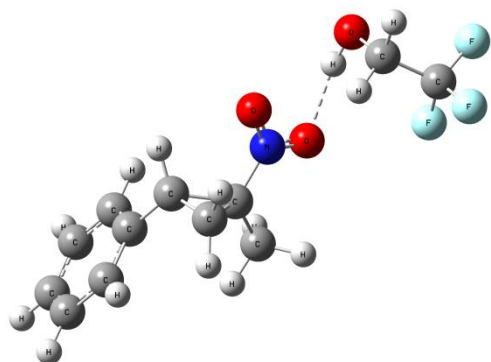

**1c-trans-TFE**

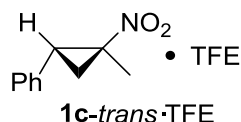

Charge 0; multiplicity 1

```

C 0.93790400 -0.03867200 -0.13697300
C 2.32962600 -0.08567900 0.42316400
H 2.43575700 0.60273500 1.27997800
H 3.03746600 0.21731600 -0.36602300
H 2.58162200 -1.10835900 0.75238200
C 0.61838100 -0.33506800 -1.58216500
H -0.29324900 -0.90959200 -1.77655500
H 1.49371200 -0.58148300 -2.19487600
C 0.46070600 1.06253300 -1.08128200
H -0.57130400 1.38024600 -0.88243600
C 1.42326300 2.15864800 -1.41862200
C 1.58101300 3.22607500 -0.52450100
H 0.99584200 3.24108600 0.40527200
C 2.47232500 4.25947100 -0.80705300
H 2.58905900 5.08870400 -0.09786600
C 3.21608000 4.23821000 -1.98979100
H 3.91785600 5.05149300 -2.21362900
C 3.06065700 3.18046400 -2.88557900
H 3.63804300 3.16009200 -3.81853800
C 2.16878200 2.14379300 -2.60075100
H 2.04610200 1.31766900 -3.31325200
N -0.10292200 -0.46793800 0.80920700
O -1.26134600 -0.51211800 0.44052100
O 0.24980300 -0.76261200 1.94319800
H -1.33791800 -1.09895000 2.91934200
O -2.15290900 -1.58212700 3.15357600
C -2.05169100 -2.84930800 2.55639600
C -1.13592800 -3.73058600 3.37567200
H -1.65286400 -2.81483700 1.52280100
H -3.04659000 -3.32751500 2.53932800
F -0.99041900 -4.95493200 2.82226600
F -1.59800600 -3.91012400 4.63345600
F 0.10141100 -3.19241400 3.49344200

```

DFT M11; cc-pvdz+d, solvent TFE, SMD model

Total electronic energy= -1045.169799 E<sub>0</sub>

Sum of electronic and zero-point Energies= -1044.917619 E<sub>0</sub> + E<sub>ZPE</sub>

Sum of electronic and thermal Energies= -1044.898828 E<sub>0</sub> + E<sub>tot</sub>

Sum of electronic and thermal Enthalpies= -1044.897884 E<sub>0</sub> + H<sub>corr</sub>

Sum of electronic and thermal Free Energies= -1044.963956 E<sub>0</sub> + G<sub>corr</sub>

Zero-point correction (*unscaled*) = 0.252180

Number of imaginary vibrational frequencies = 0

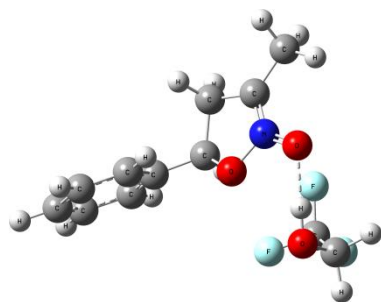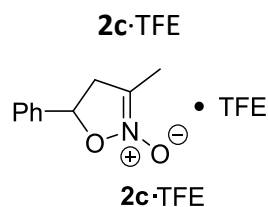

Charge 0; multiplicity 1

C -1.65453900 0.50863500 -1.62879200  
 C -3.07951000 0.52723300 -2.04270600  
 C -0.76646500 1.66010400 -1.27607400  
 O 0.35463600 -0.40897900 -1.20095400  
 O -1.29762100 -1.78521700 -1.82339500  
 C 0.43486100 0.93080000 -0.64782000  
 H -3.43475400 -0.49965400 -2.21981200  
 H -3.69366900 1.00423000 -1.25855800  
 H -3.19262200 1.12041800 -2.96837300  
 H -1.24516500 2.35464700 -0.56717700  
 H -0.48931600 2.22226900 -2.18875100  
 C 1.78645200 1.51150100 -0.97409500  
 C 2.49215800 2.22463700 -0.00361300  
 C 2.32497800 1.36352800 -2.25686300  
 C 3.72593200 2.79995300 -0.31541000  
 H 2.07178700 2.32774000 1.00576900  
 C 3.56026700 1.93038400 -2.56459300  
 H 1.77181100 0.79122600 -3.01350800  
 C 4.26159300 2.65254200 -1.59486000  
 H 4.27535000 3.36085700 0.45109700  
 H 3.98176200 1.80731900 -3.57023300  
 H 5.23387400 3.09902600 -1.83865600  
 H 0.30135100 0.84338100 0.44602400  
 N -0.97849500 -0.59051900 -1.58121700  
 C 0.00574300 -3.39683500 0.80544900  
 O 0.53937900 -3.24783700 -0.48053300  
 H -0.12343100 -2.77337200 -1.03708200  
 H -1.01895000 -3.82002200 0.81838600  
 H 0.66647500 -4.05506800 1.39695100  
 C -0.05831800 -2.07293100 1.54137600  
 F -0.33901700 -2.25397200 2.85156400  
 F 1.10288600 -1.38520000 1.46721200  
 F -1.02334200 -1.25108700 1.04923400

|                                                                                              |
|----------------------------------------------------------------------------------------------|
| DFT M11; cc-pvdz+d, solvent TFE, SMD model                                                   |
| Total electronic energy= -1045.179441 E <sub>0</sub>                                         |
| Sum of electronic and zero-point Energies= -1044.926398 E <sub>0</sub> + E <sub>ZPE</sub>    |
| Sum of electronic and thermal Energies= -1044.908035 E <sub>0</sub> + E <sub>tot</sub>       |
| Sum of electronic and thermal Enthalpies= -1044.907091 E <sub>0</sub> + H <sub>corr</sub>    |
| Sum of electronic and thermal Free Energies= -1044.969924 E <sub>0</sub> + G <sub>corr</sub> |
| Zero-point correction ( <i>unscaled</i> ) = 0.253042                                         |
| Number of imaginary vibrational frequencies = 0                                              |

## 9. References

1. M. A. Drinan, T. D. Lash, *J. Heterocyclic Chem.*, 1994, **31**, 255.
2. C. A. Citron, P. Rabe, J. S. Dickschat, *J. Nat. Prod.*, 2012, **75**, 10, 1765.
3. A. Bhattacharjya, R. Mukhopadhyay, S. C. Pakrashi, *Synthesis*, 1985, **9**, 886.
4. S. Hajra, B. Jana, *Org. Lett.*, 2017, **19**, 4778.
5. H. Griesser, R. Öhrlein, W. Schwab, R. Ehrler, V. Jäger, *Org. Synth.*, 2000, **77**, 236.
6. Y. A. Antonova, S. L. Ioffe, A. Y. Sukhorukov, A. A. Tabolin, *Eur. J. Org. Chem.*, 2021, **2021**, 3197.
7. R. Ballini, G. Bosica, G. Rifaiani, *Helvetica Chim. Acta*, 1995, **78**, 879.
8. D. Seebach, F. Lehr, *Helvetica Chim. Acta*, 1979, **62**, 2239.
9. S. Cai, X. Zhao, X. Wang, Q. Liu, Z. Li, D.Z. Wang, *Angew. Chem. Int. Ed.*, 2012, **51**, 8050.
10. G. P. Marsh, P. J. Parsons, C. McCarthy, X. G. Corniquet, *Org. Lett.*, 2007, **9**, 2613.
11. J. Li, M. J. Lear, Y. Hayashi, *Chem. Commun.*, 2018, **54**, 6360.
12. J. V. Matlock, S. P. Fritz, S. A. Harrison, D. M. Coe, E. M. McGarrigle, V. K. Aggarwal, *J. Org. Chem.*, 2014, **79**, 10226.
13. Y. L. Chow, B. H. Bakker, *Synthesis*, 1982, **8**, 648.
14. P. Gopinath, S. Chandrasekaran, *J. Org. Chem.*, 2011, **76**, 700.
15. A. Reichle, M. Koch, H. Sterzel, L. J. Großkopf, J. Floss, J. Rehbein, O. Reiser, *Angew. Chem. Int. Ed.*, 2023, **62**, e202219086.
16. A. B. Charette, R. Wurz, *J. Mol. Catal. A: Chemical*, 2003, **196**, 83.
17. R. A. Kunetsky, A. D. Dilman, S. L. Ioffe, M. I. Struchkova, Y. A. Strelenko, V. A. Tartakovsky, *Org. Lett.*, 2003, **5**, 4907.
18. O. Lifchits, A.B. Charette, *Org. Lett.*, 2008, **10**, 2809.
19. S. Yamamura, M. Toda, Y. Hirata, *Org. Synth.* 1973, **53**, 86.
20. A. Baglieri, L. Meschisi, F. De Sarlo, F. Machetti, *Eur. J. Org. Chem.*, 2016, **2016**, 4643.
21. Gaussian 16, Revision C.01, M. J. Frisch, G. W. Trucks, H. B. Schlegel, G. E. Scuseria, M. A. Robb, J. R. Cheeseman, G. Scalmani, V. Barone, G. A. Petersson, H. Nakatsuji, X. Li, M. Caricato, A. V. Marenich, J. Bloino, B. G. Janesko, R. Gomperts, B. Mennucci, H. P. Hratchian, J. V. Ortiz, A. F. Izmaylov, J. L. Sonnenberg, D. Williams-Young, F. Ding, F. Lipparini, F. Egidi, J. Goings, B. Peng, A. Petrone, T. Henderson, D. Ranasinghe, V. G. Zakrzewski, J. Gao, N. Rega, G. Zheng, W. Liang, M. Hada, M. Ehara, K. Toyota, R. Fukuda, J. Hasegawa, M. Ishida, T. Nakajima, Y. Honda, O. Kitao, H. Nakai, T. Vreven, K. Throssell, J. A. Montgomery, Jr., J. E. Peralta, F. Ogliaro, M. J. Bearpark, J. J. Heyd, E. N. Brothers, K. N. Kudin, V. N. Staroverov, T. A. Keith, R. Kobayashi, J. Normand, K. Raghavachari, A. P. Rendell, J. C. Burant, S. S. Iyengar, J. Tomasi, M. Cossi, J. M. Millam, M. Klene, C. Adamo, R. Cammi, J. W. Ochterski, R. L. Martin, K. Morokuma, O. Farkas, J. B. Foresman, D. J. Fox, Gaussian, Inc., Wallingford CT, 2016.
22. R. L. Martin, P. J. Hay, L. R. Pratt, *J. Phys. Chem. A*, 1998, **102**, 3565.
23. a) A. Poater, E. Pump, S. V. C. Vummaleti, L. Cavallo, *J. Chem. Theory Comput.*, 2014, **10**, 4442. b) D. G. Gusev, *ACS Catal.*, 2016, **6**, 6967. c) P. Pandey, P. Daw, N. U D. Reshi, K. R.

Ehmann, M. Hoelscher, W. Leitner, J. K. Bera, *Organometallics*, 2020, **39**, 3849. d) Z. Alassad, A. Nandi, S. Kozuch, A. Milo, *J. Am. Chem. Soc.*, 2023, **145**, 89. e) M. Wodrich, M. Chang, S. Gallarati, L. Wozniak, N. Cramer, C. Corminboeuf, *Chem. Eur. J.*, 2022, **28**, e202200399.

## 10. Spectra copies

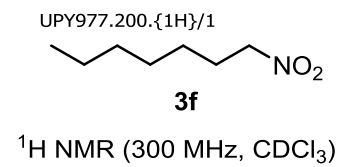

NMR of **3f**

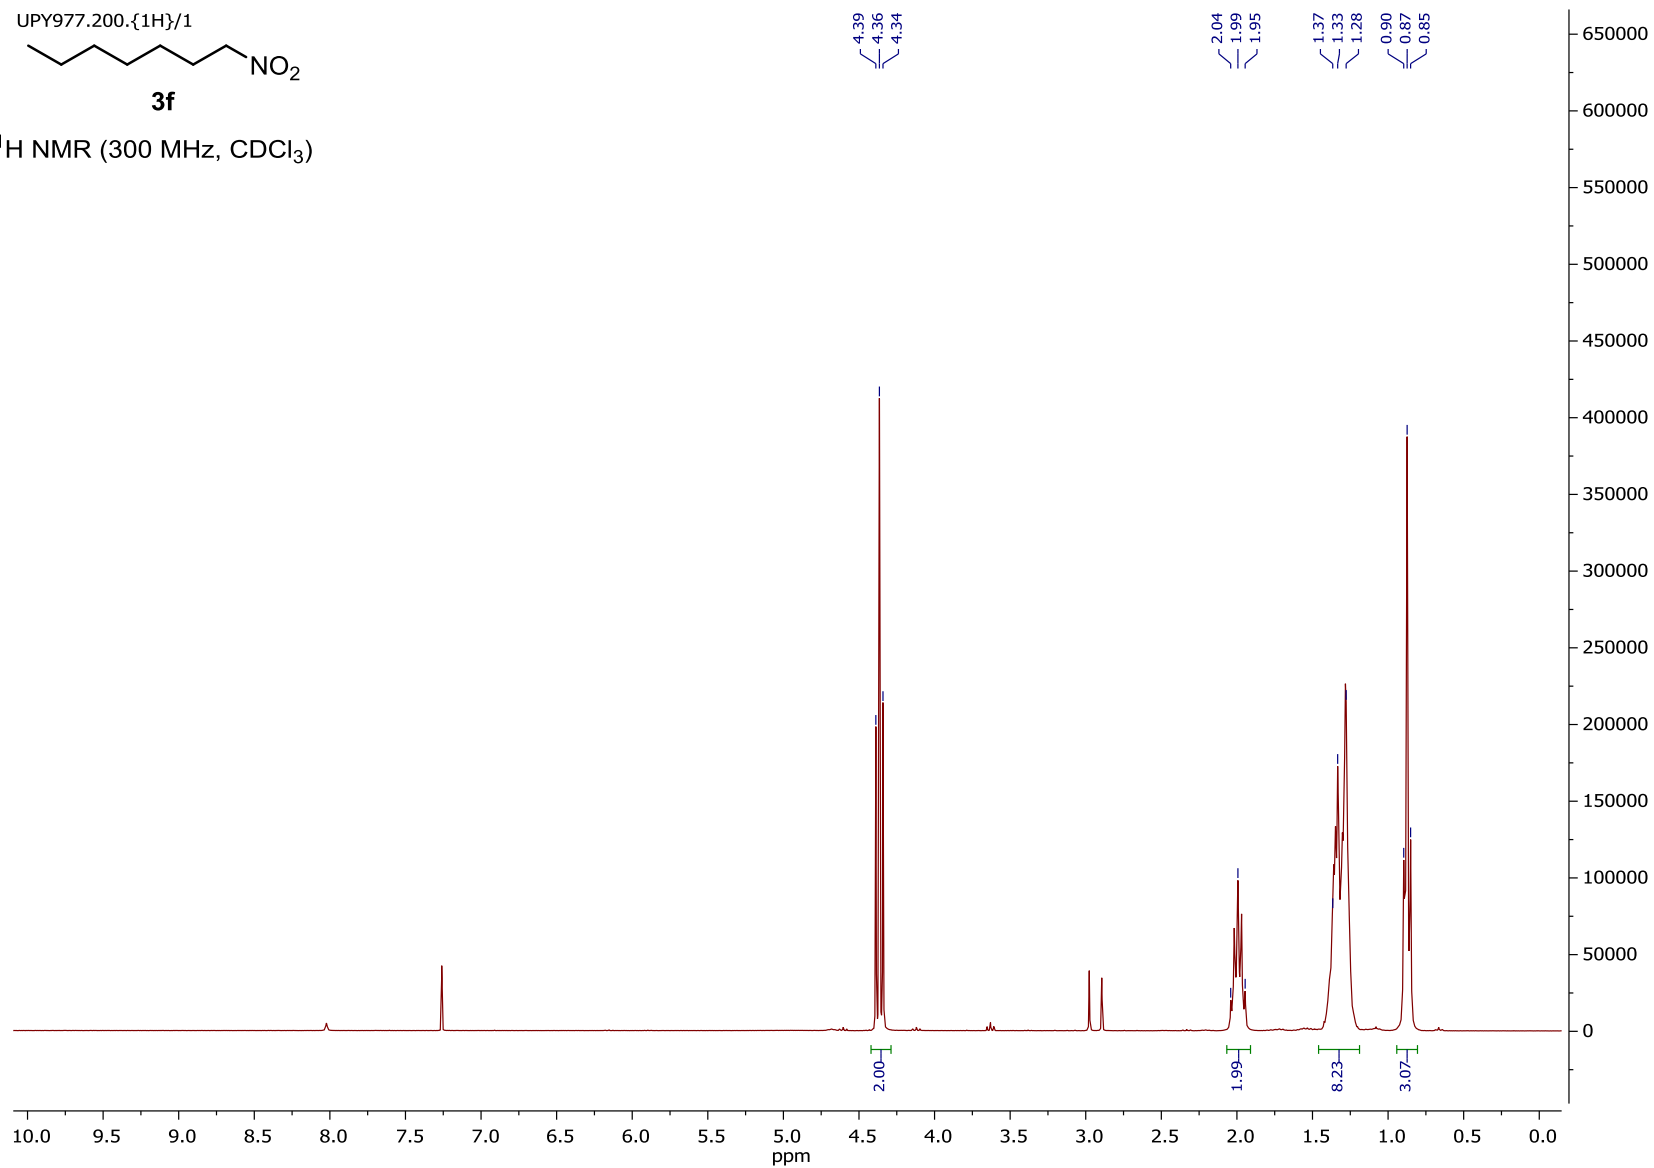

UPY1063.301.{1H}/1

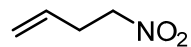

**3g**

<sup>1</sup>H NMR (300 MHz, CDCl<sub>3</sub>)

NMR of **3g**

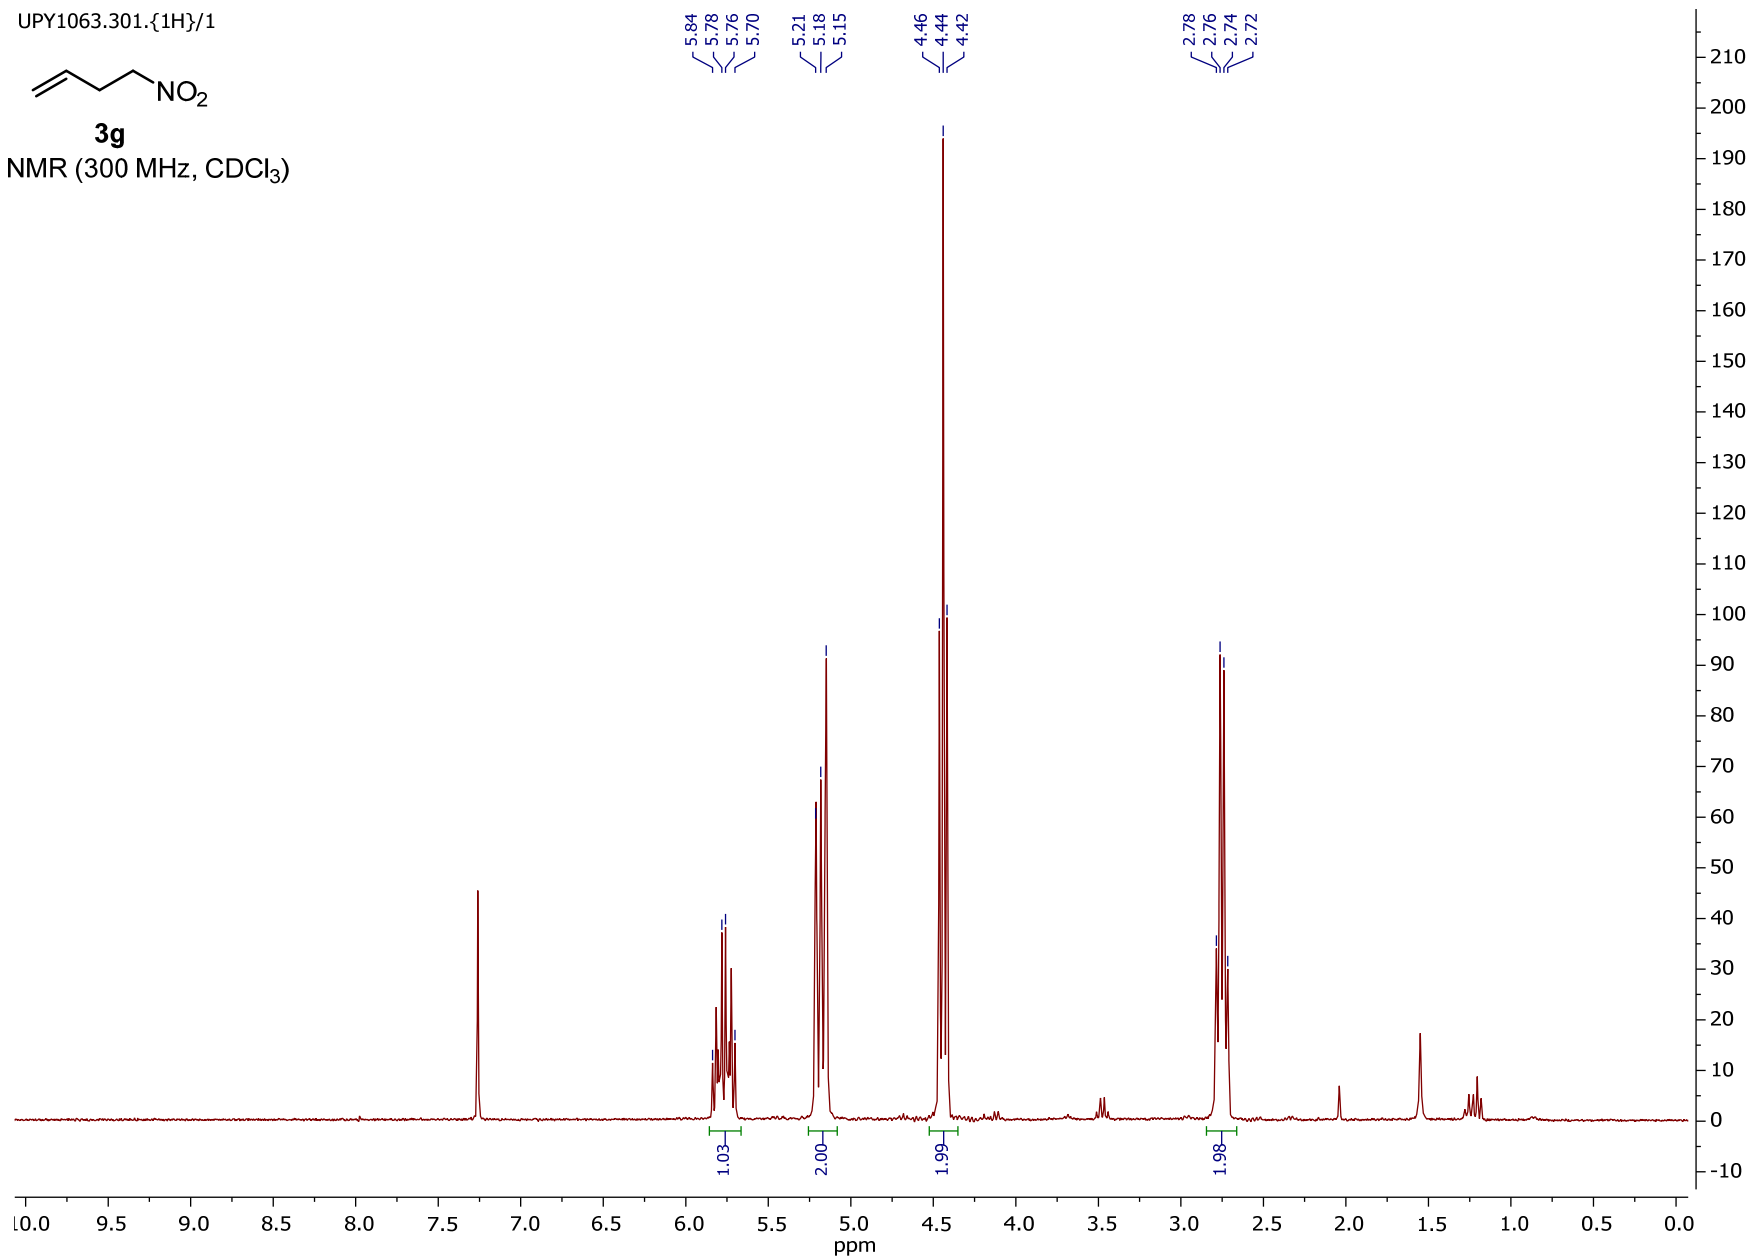



UPY1019.201.{1H}/1

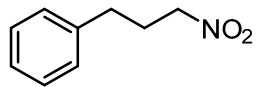

**3i**

<sup>1</sup>H NMR (300 MHz, CDCl<sub>3</sub>)

### NMR of **3i**

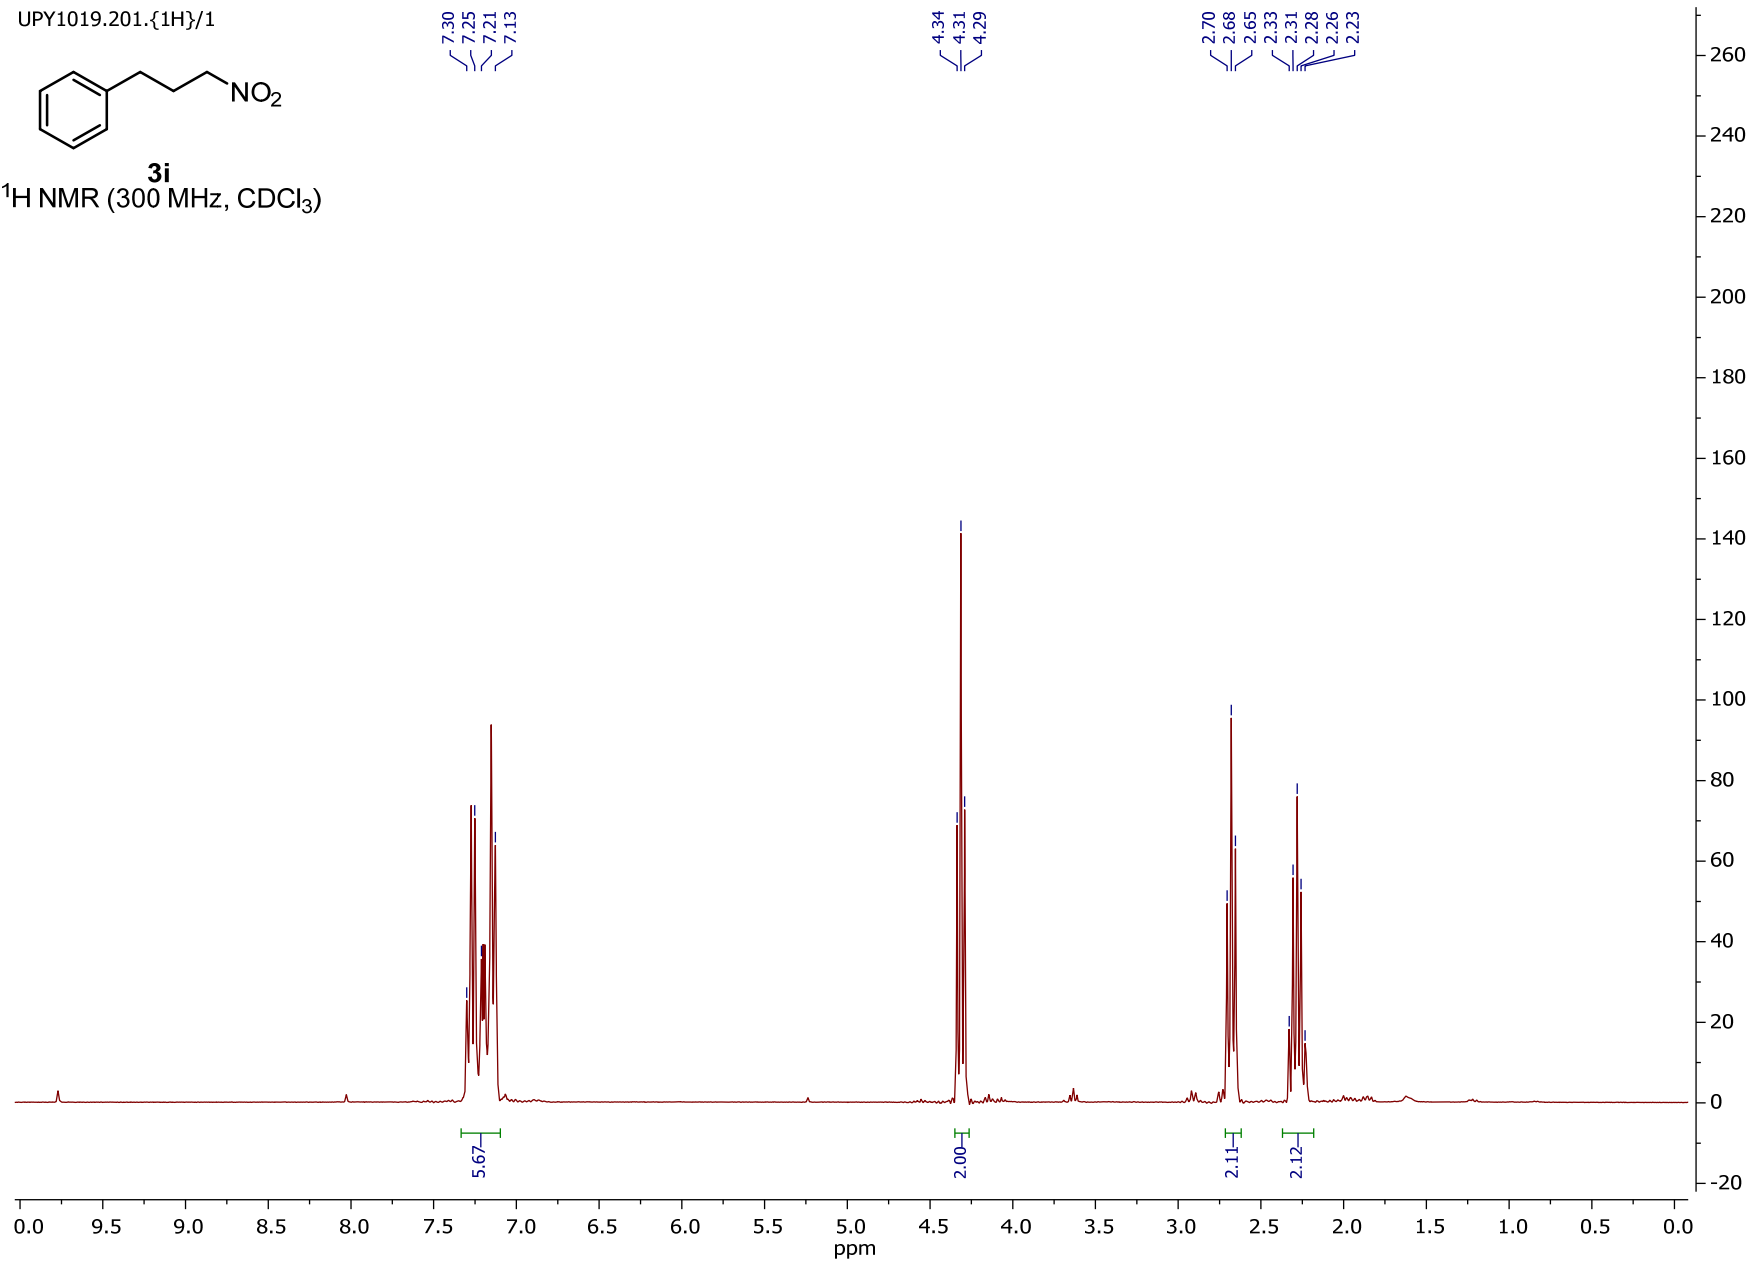

UPY1174.100.{1H}/1

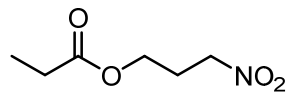

**3n**

<sup>1</sup>H NMR (300 MHz, CDCl<sub>3</sub>)

NMR of **3n**

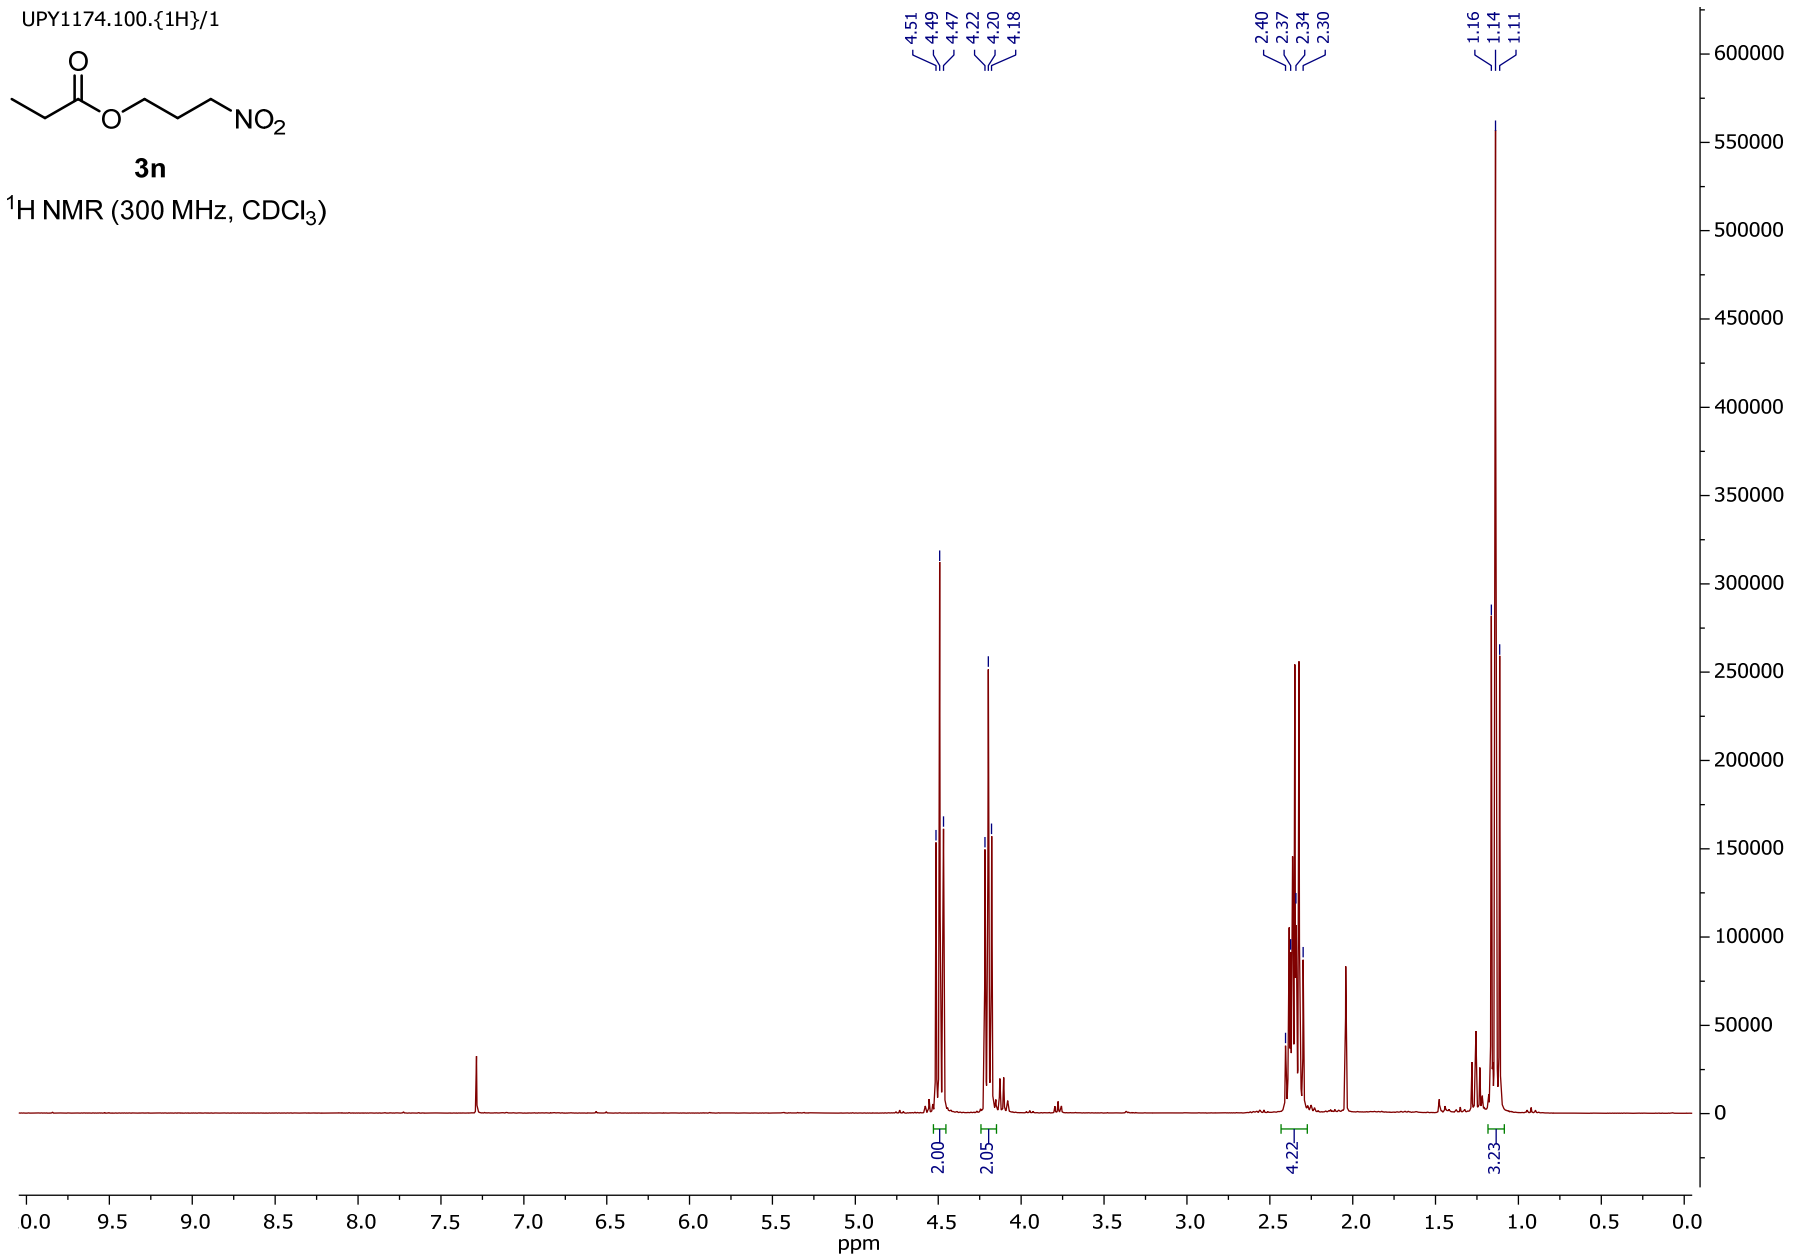

# NMR of 3n

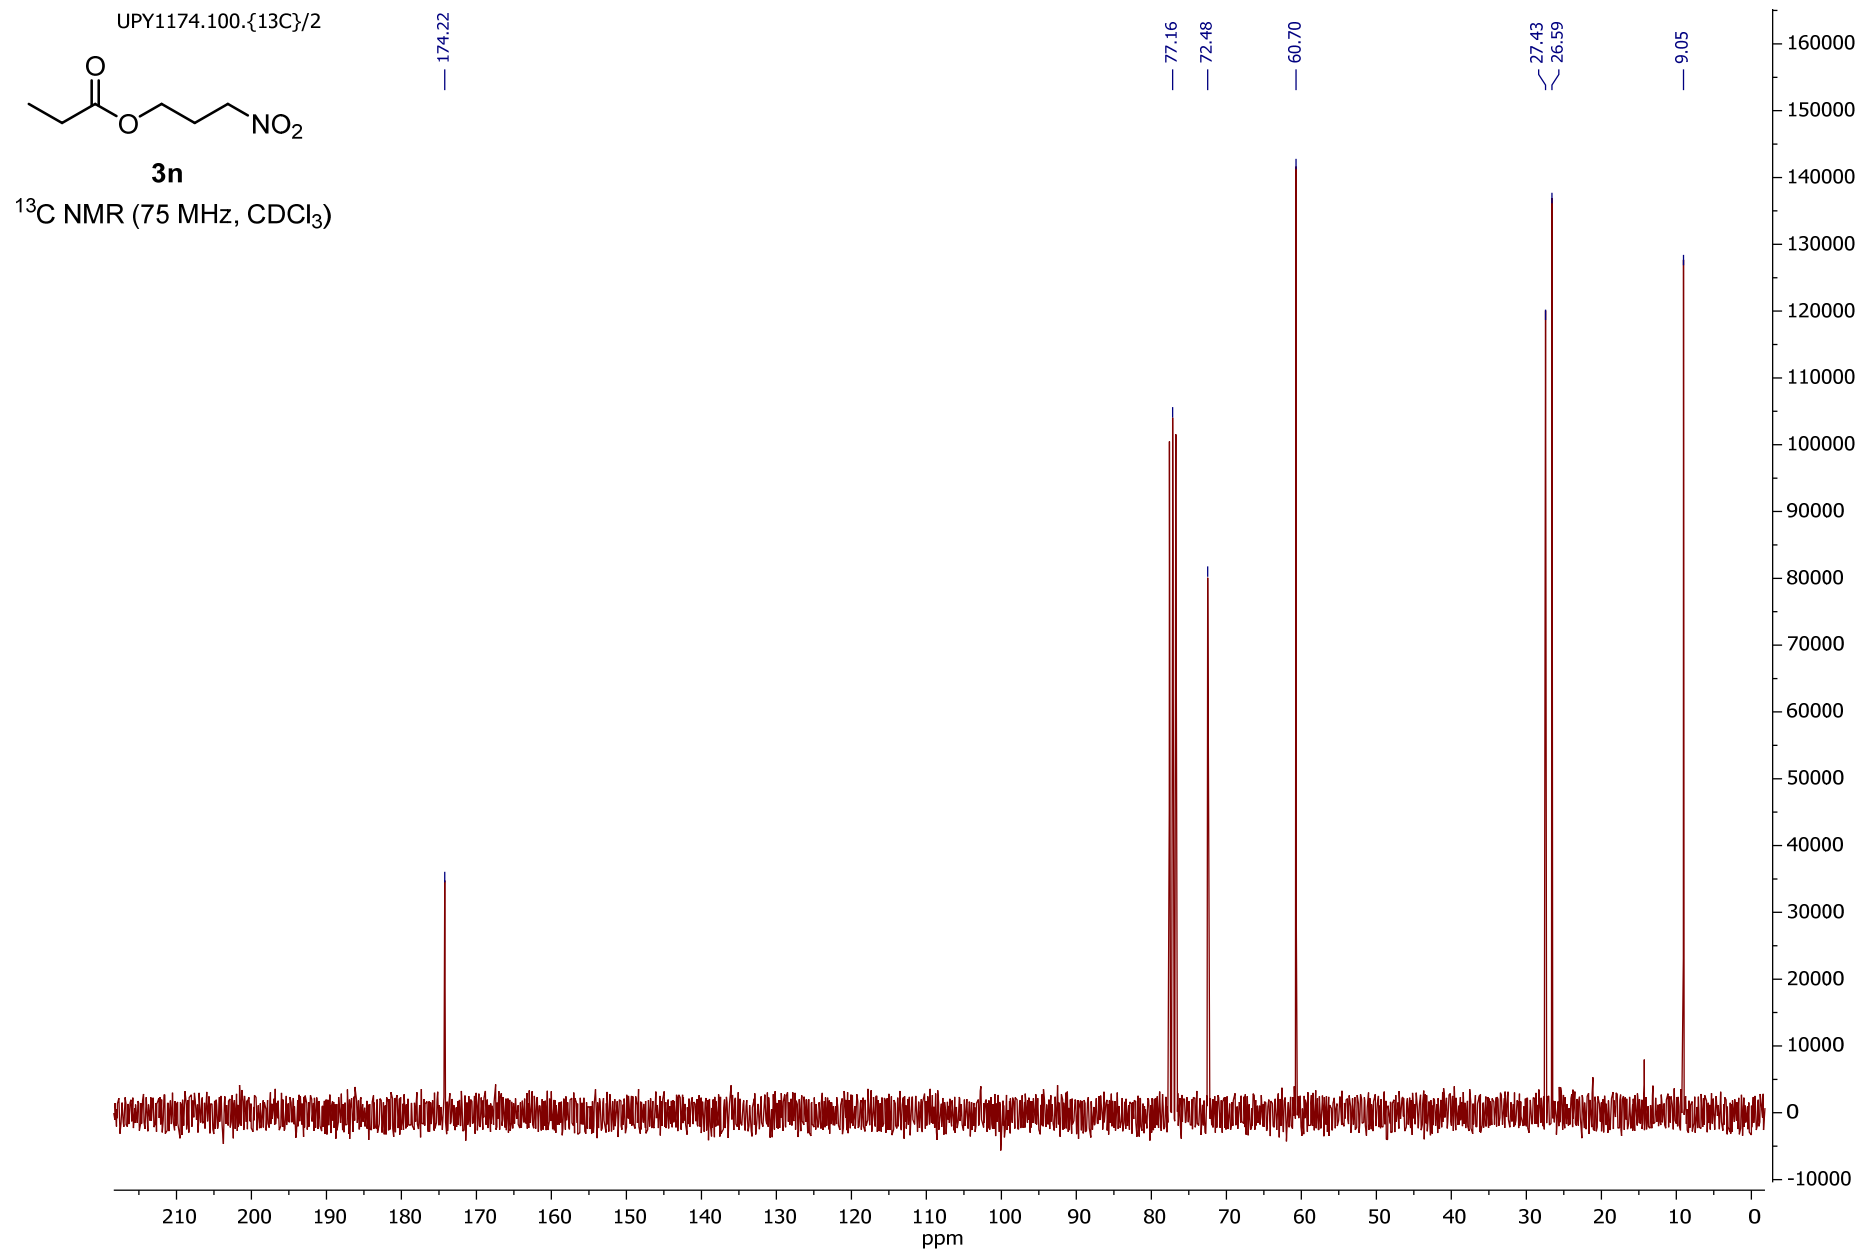

UPY1174.100.{13C}deptsp135/3

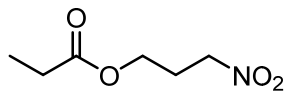

**3n**

<sup>13</sup>C DEPT NMR  
(75 MHz, CDCl<sub>3</sub>)

### NMR of 3n

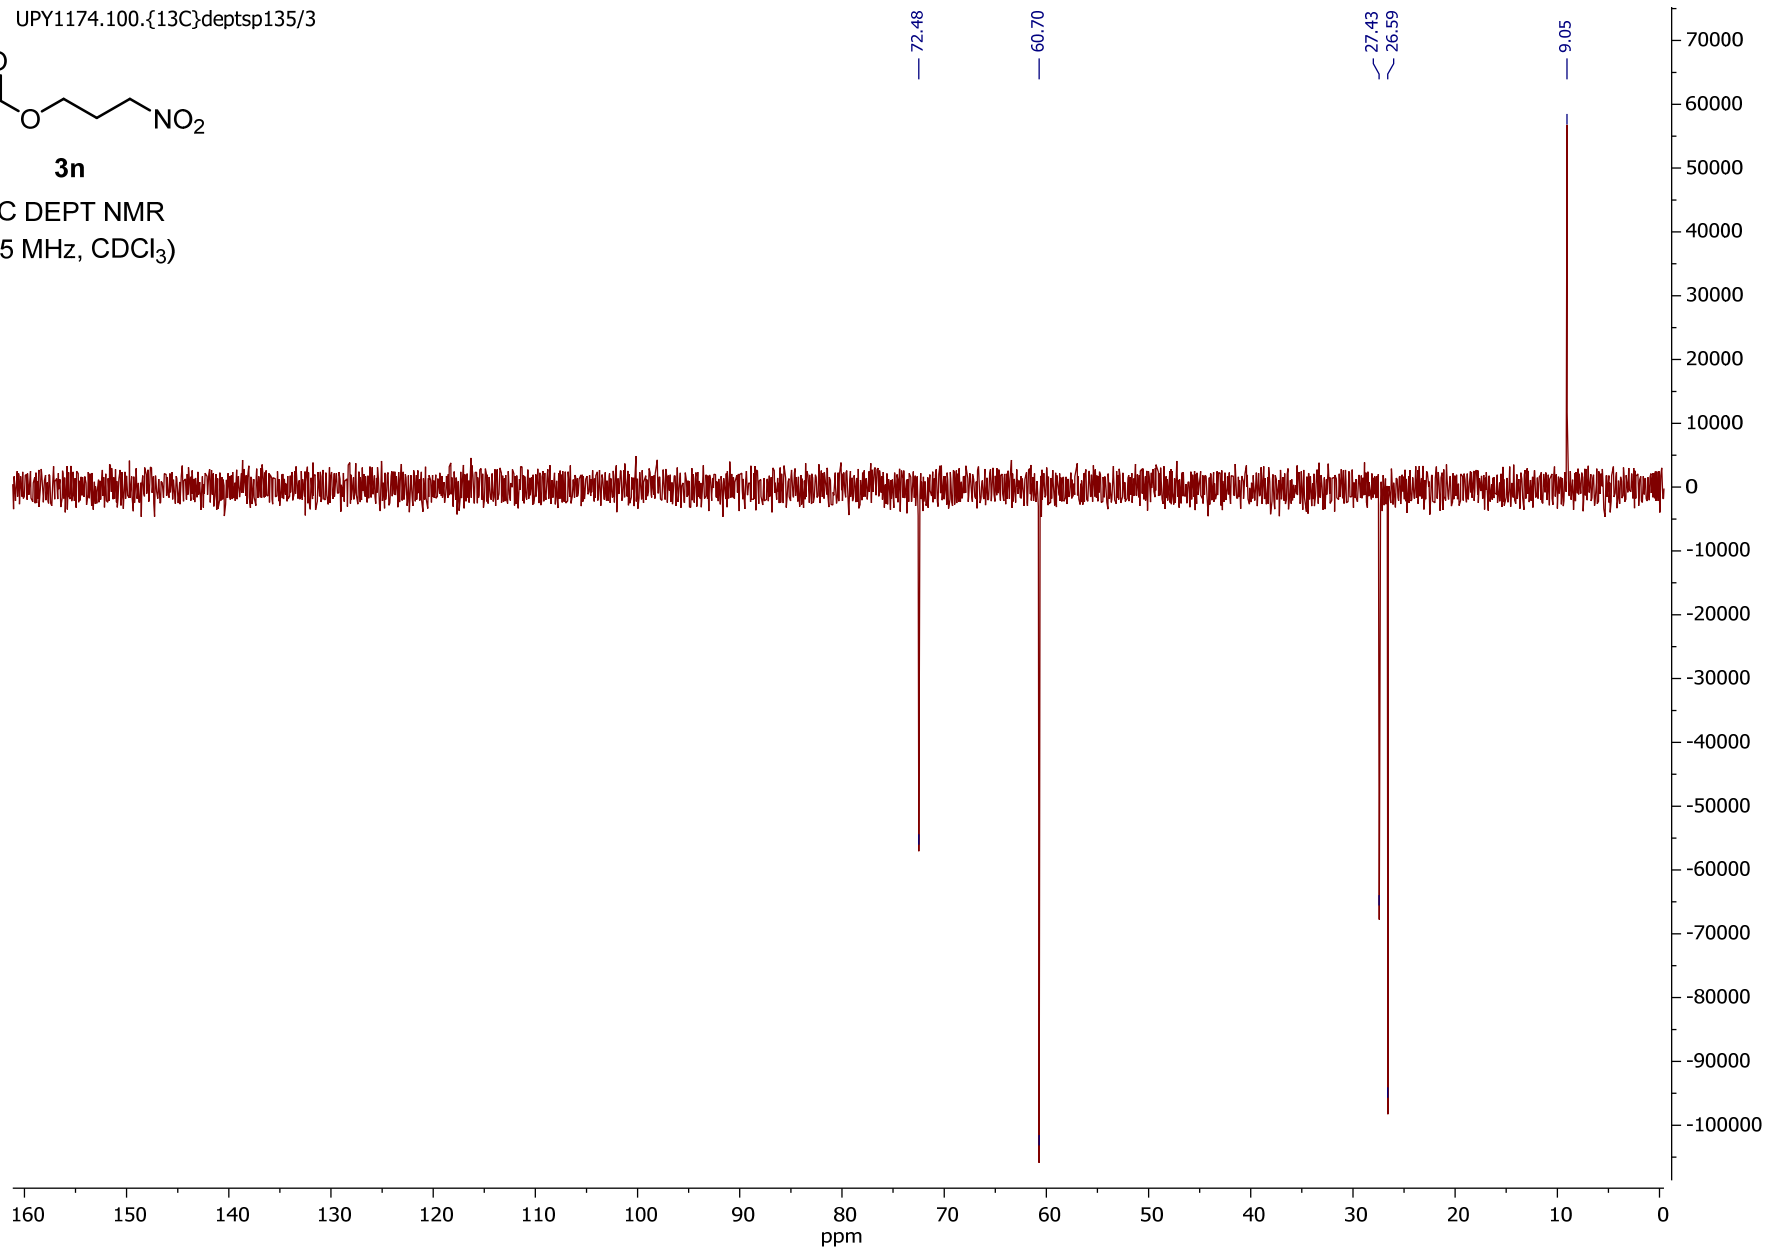

UPY929.100.{1H}/1

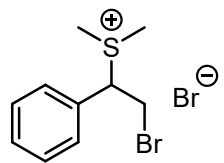

**4a**

<sup>1</sup>H NMR (300 MHz, DMSO-d<sub>6</sub>)

NMR of **4a**

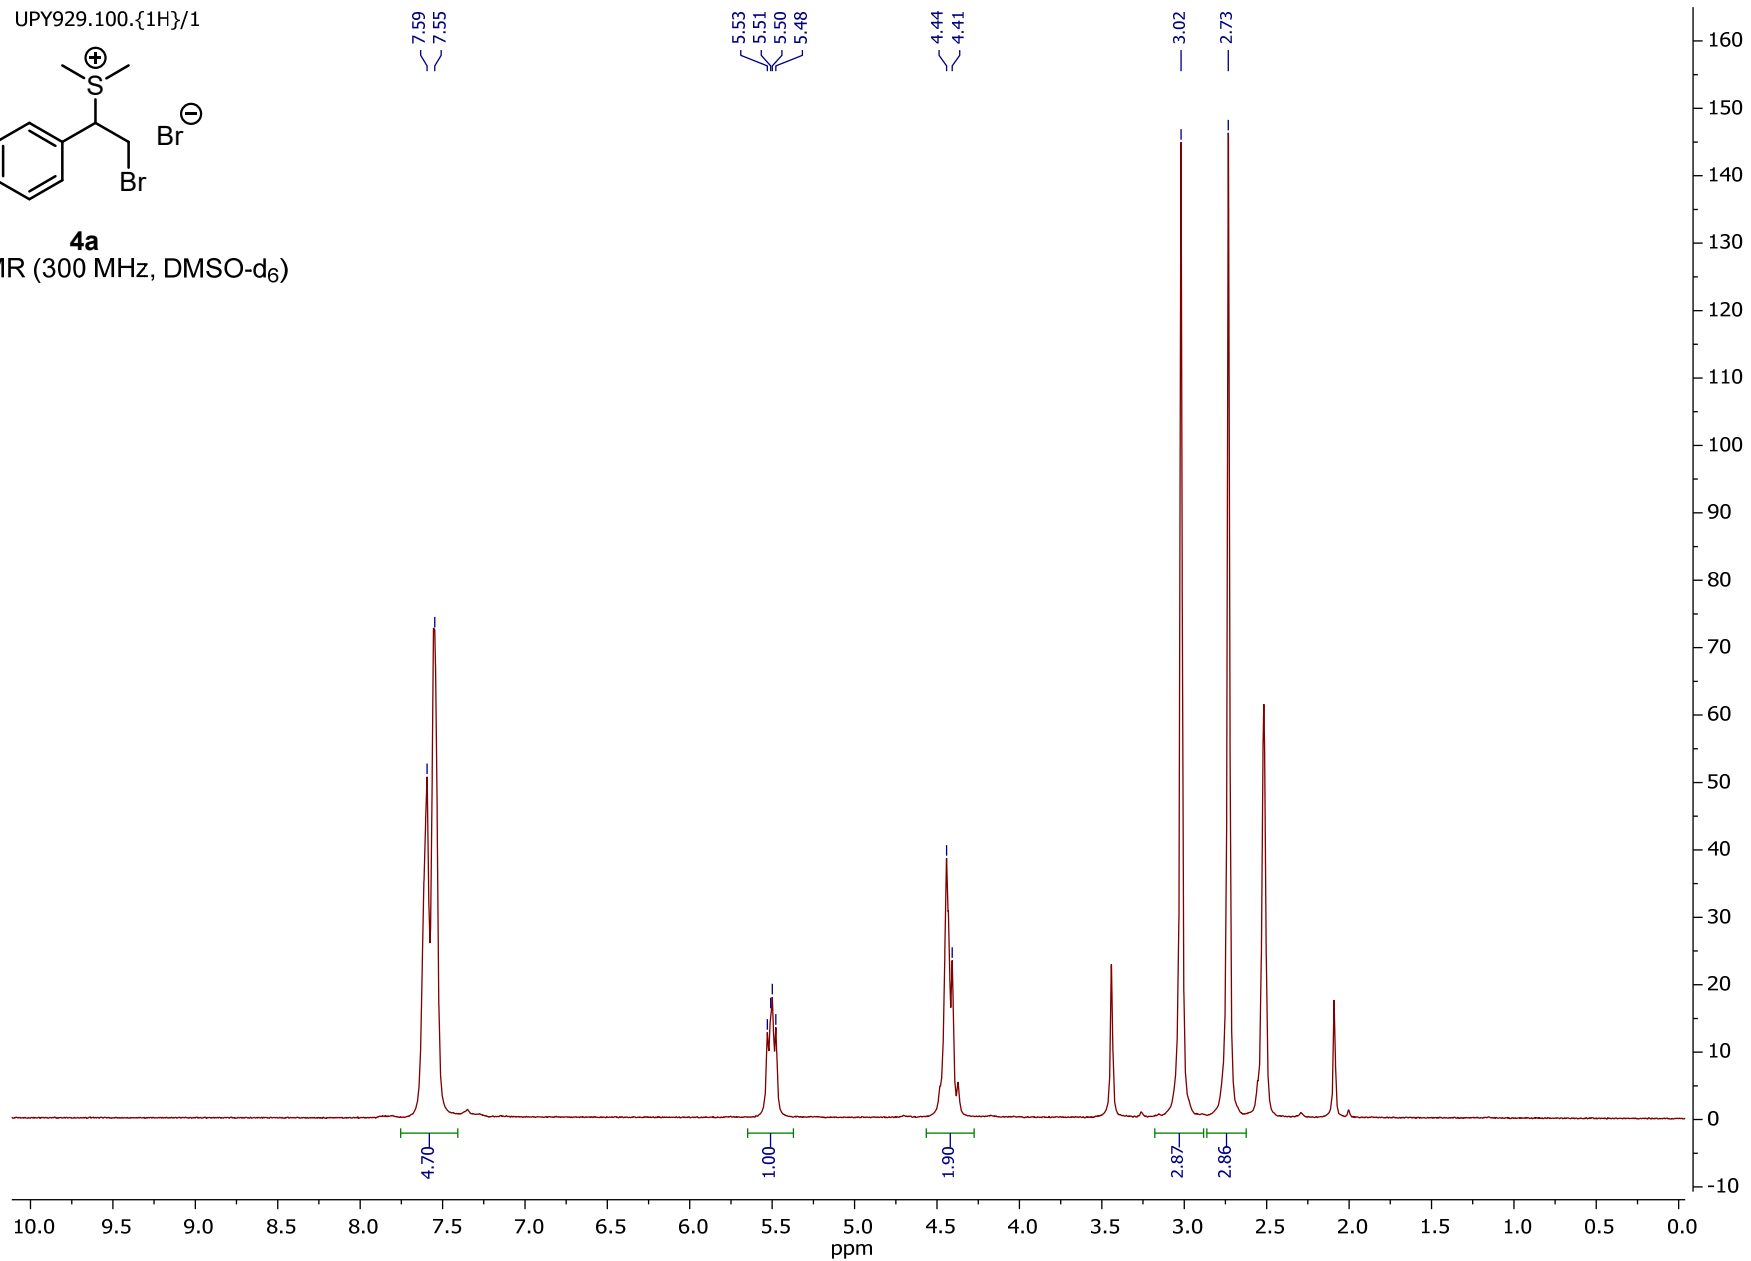

# NMR of 5a (reaction mixture of 4a + NEt<sub>3</sub> in TFE)

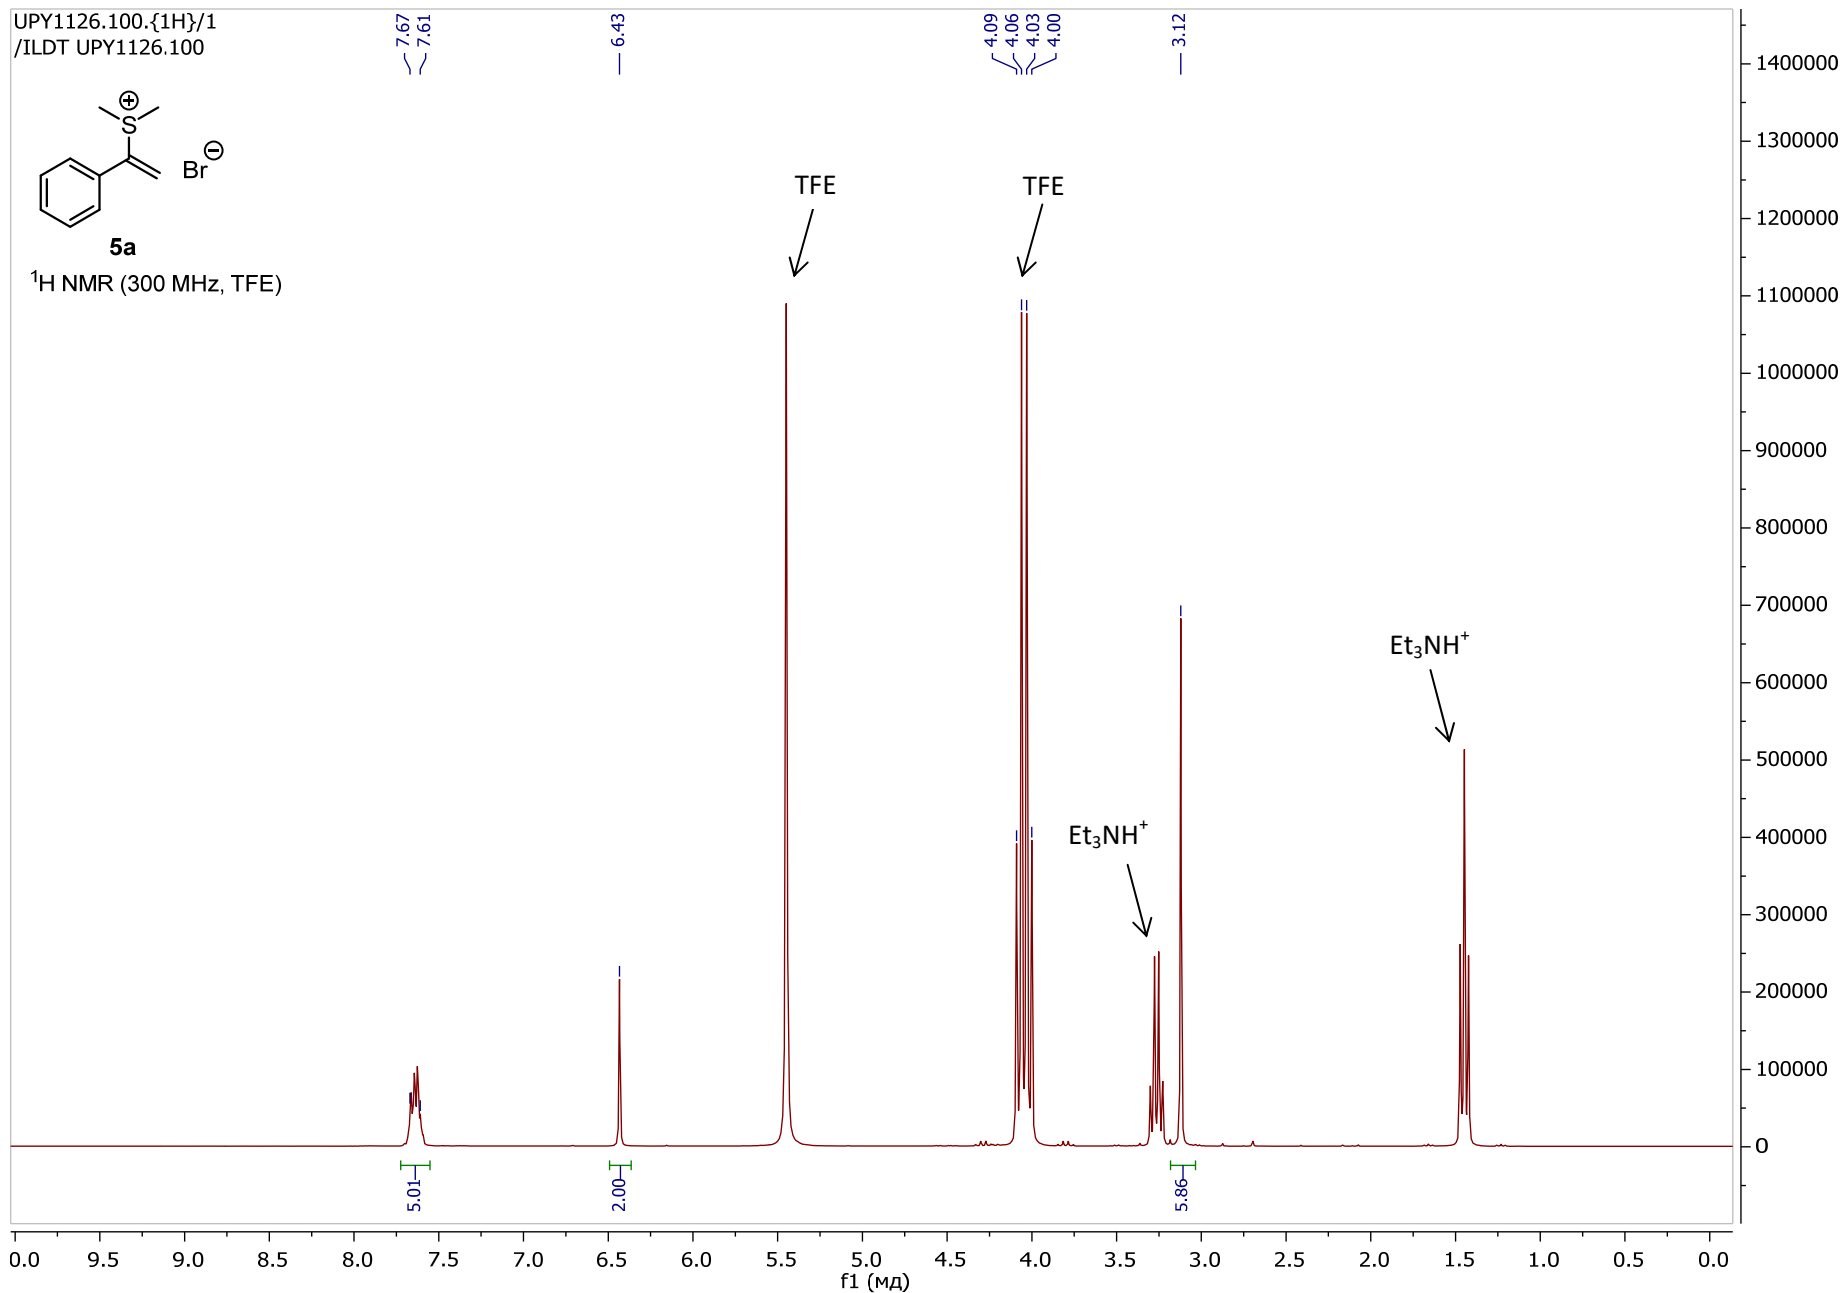

# NMR of 5a (reaction mixture of 4a + NEt<sub>3</sub> in TFE)

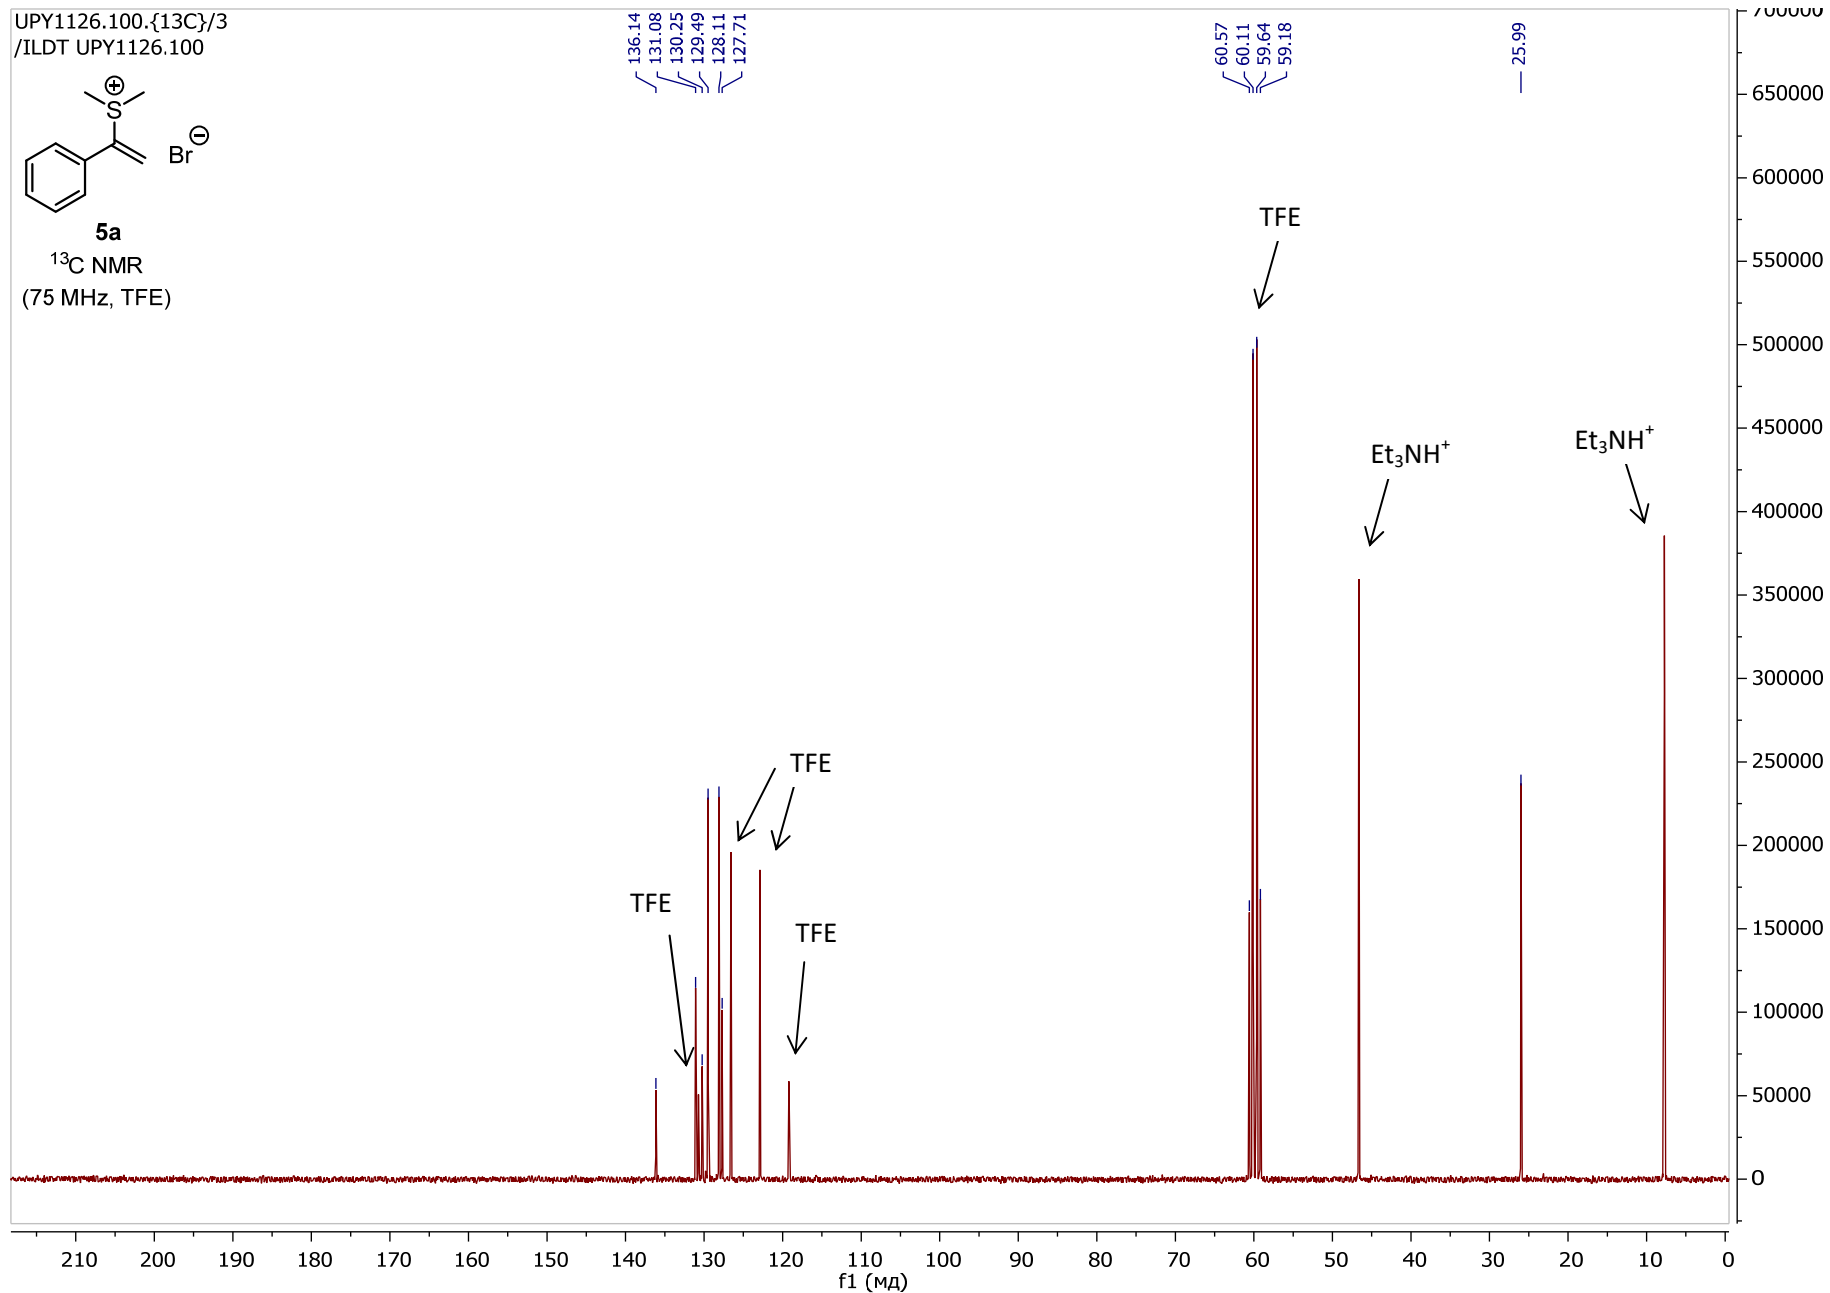

# NMR of 5a (reaction mixture of 4a + NEt<sub>3</sub> in TFE)

UPY1126.100.{13C}deptsp135/6  
/ILDY UPY1126.100

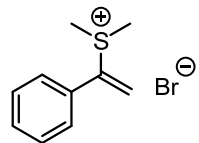

**5a**

<sup>13</sup>C DEPT NMR  
(75 MHz, TFE)

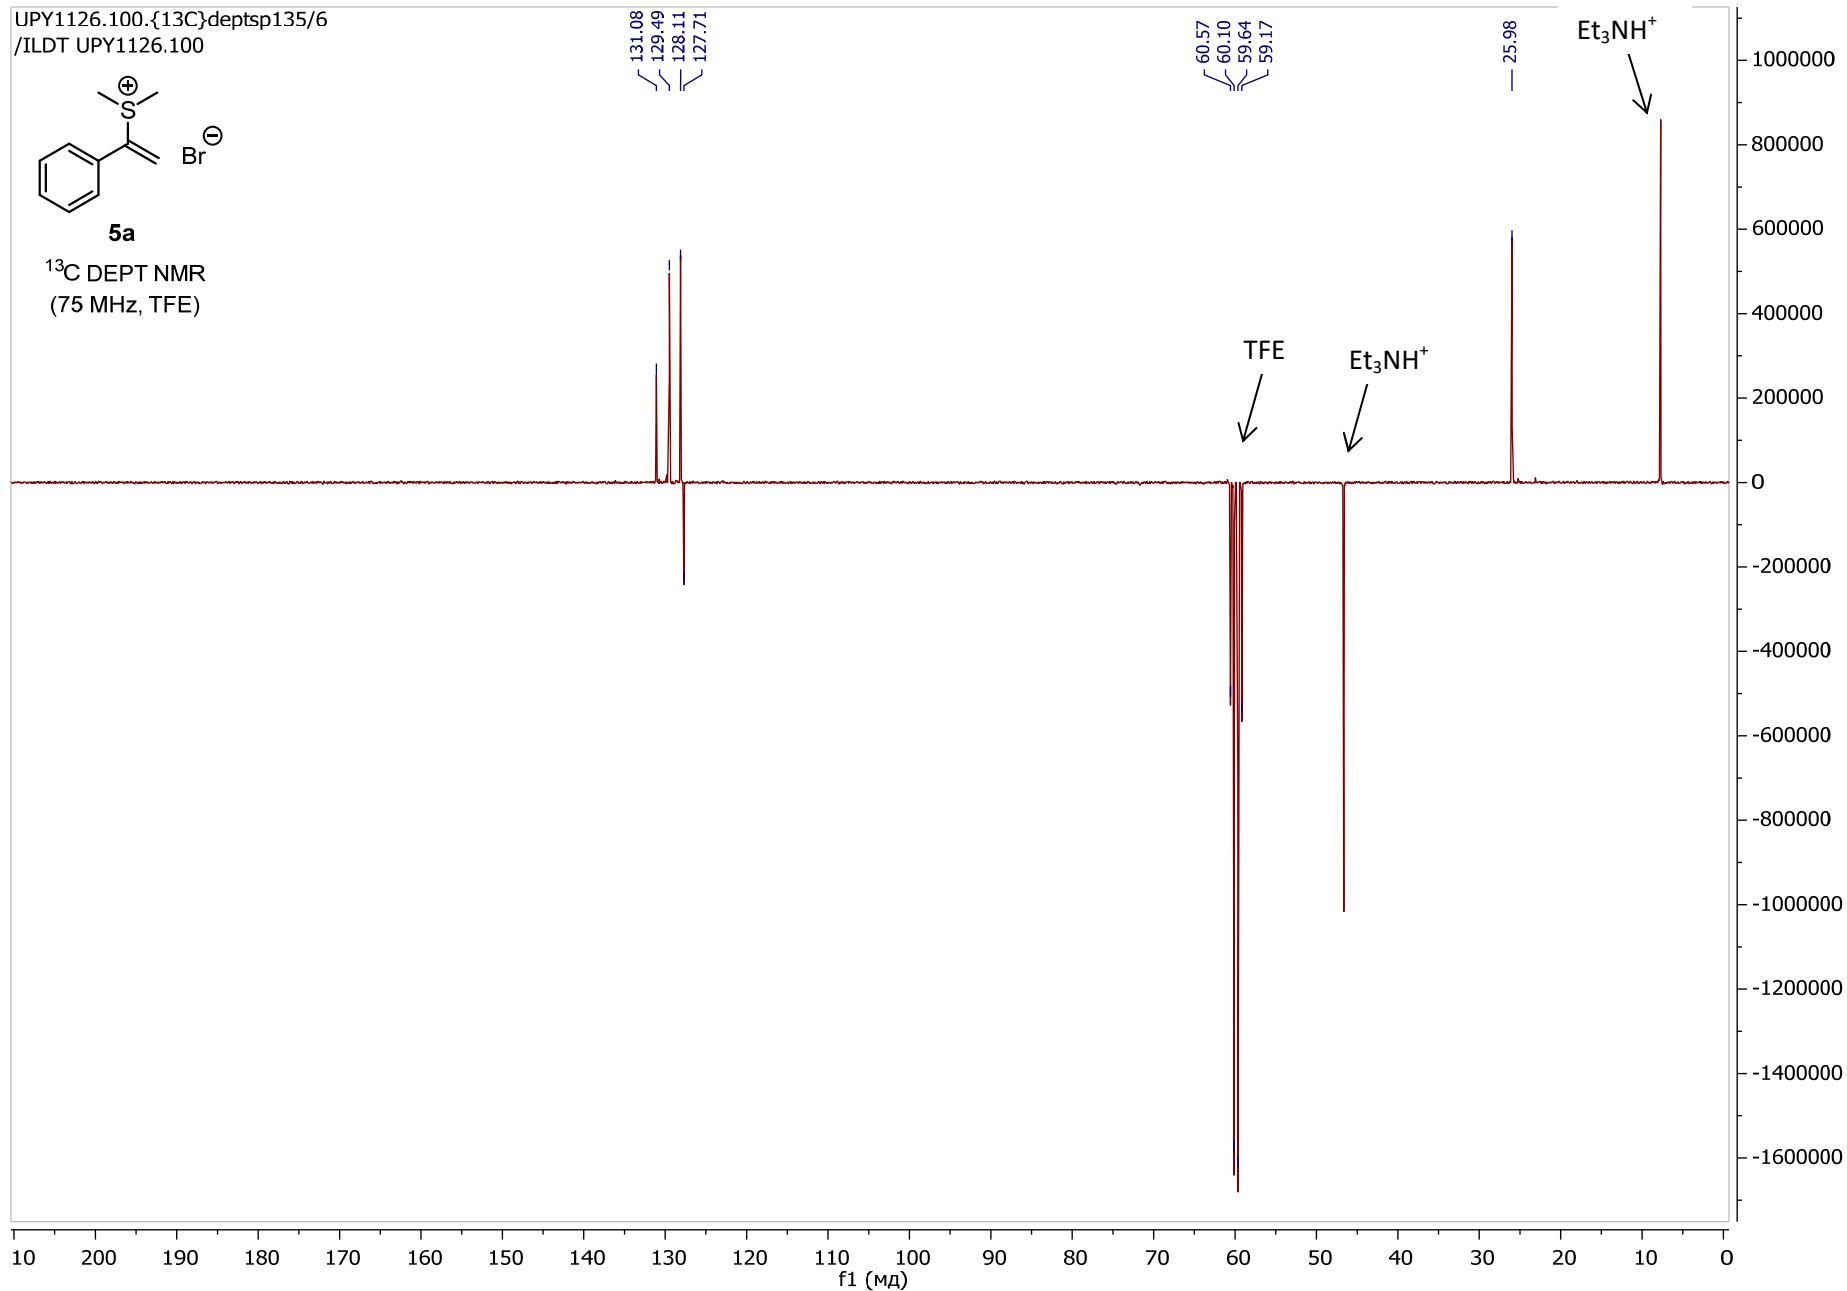



NMR of **5a** (reaction mixture of **4a** + NEt<sub>3</sub> in TFE)

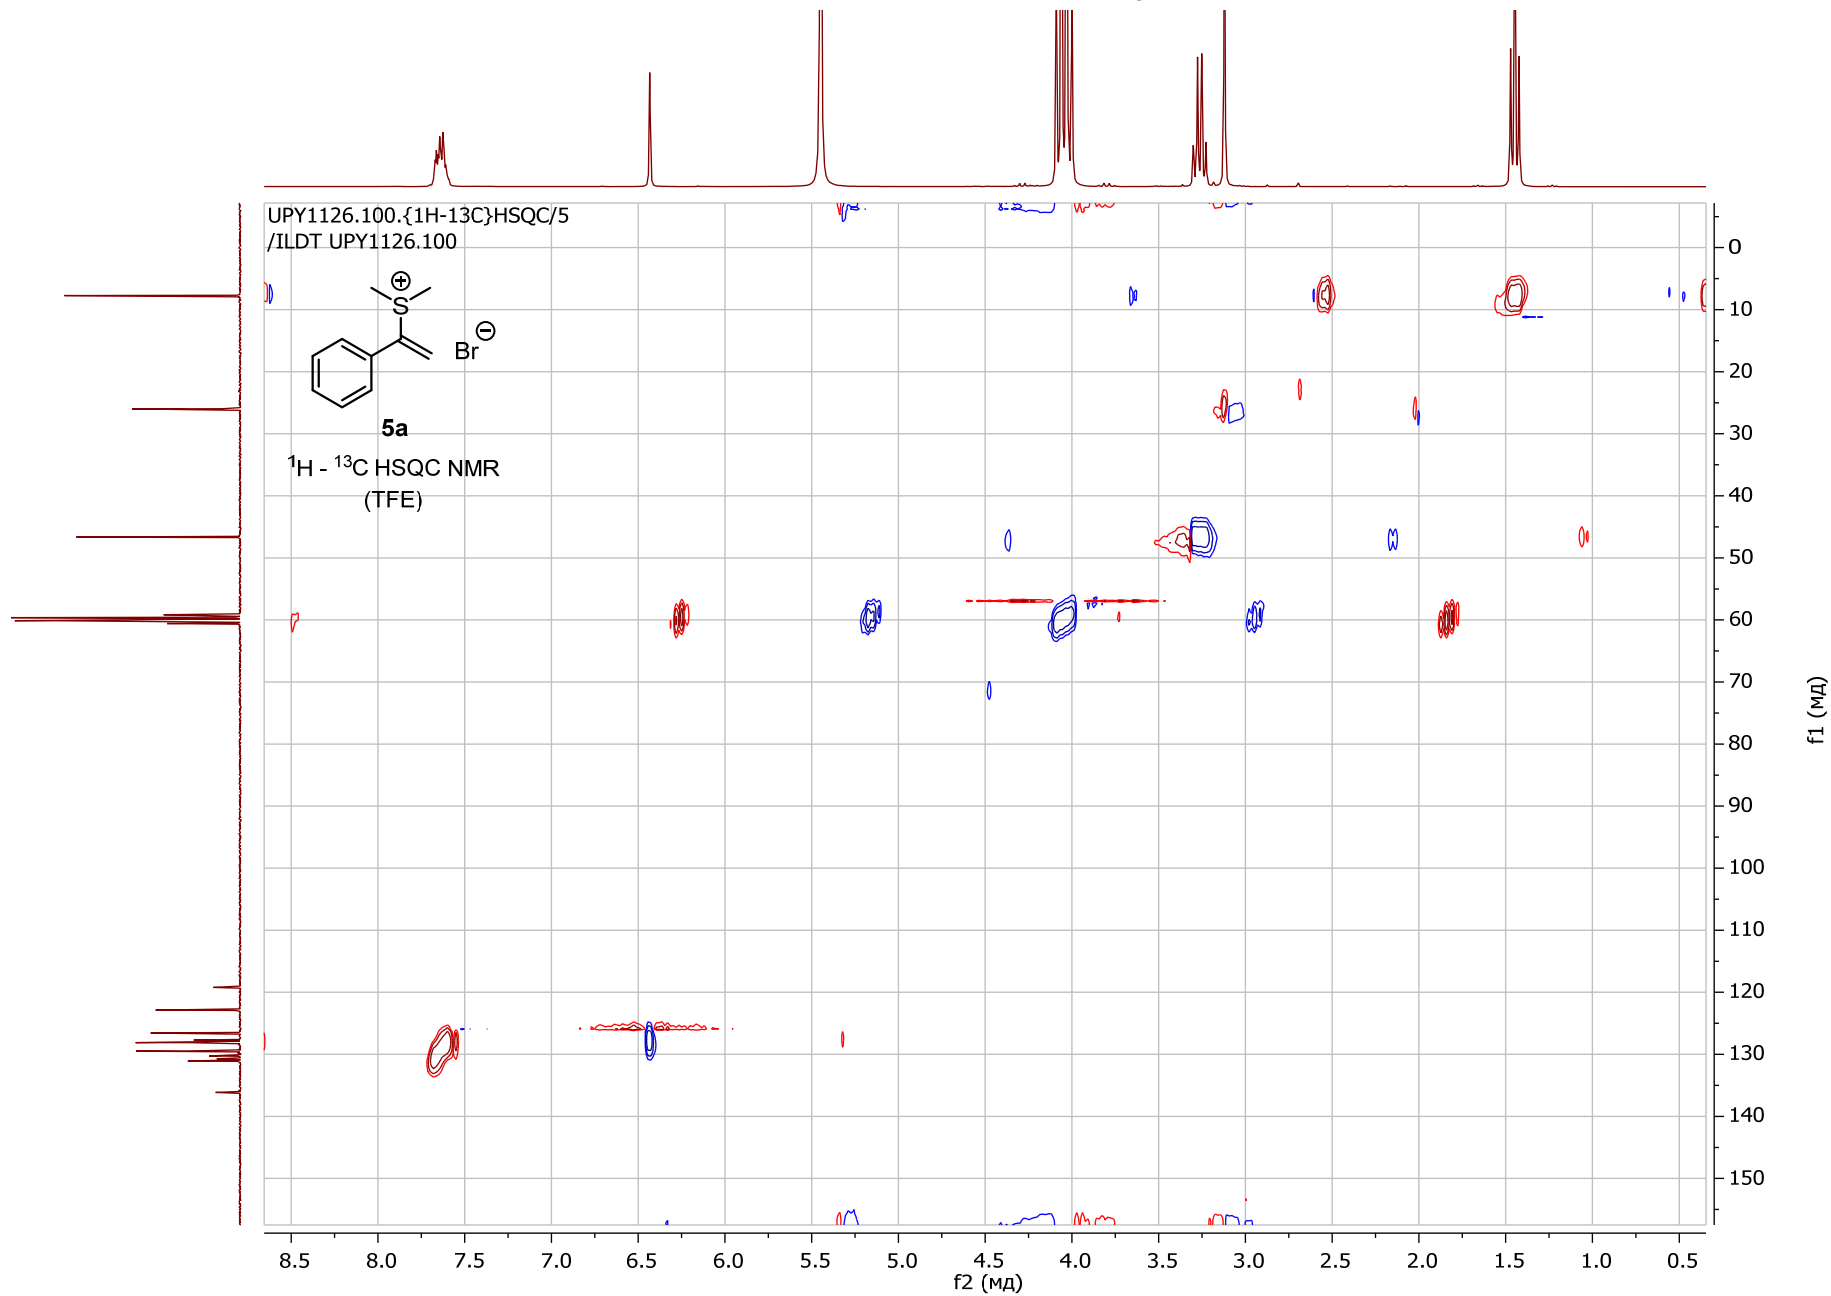

NMR of **5a** (reaction mixture of **4a** + NEt<sub>3</sub> in TFE)

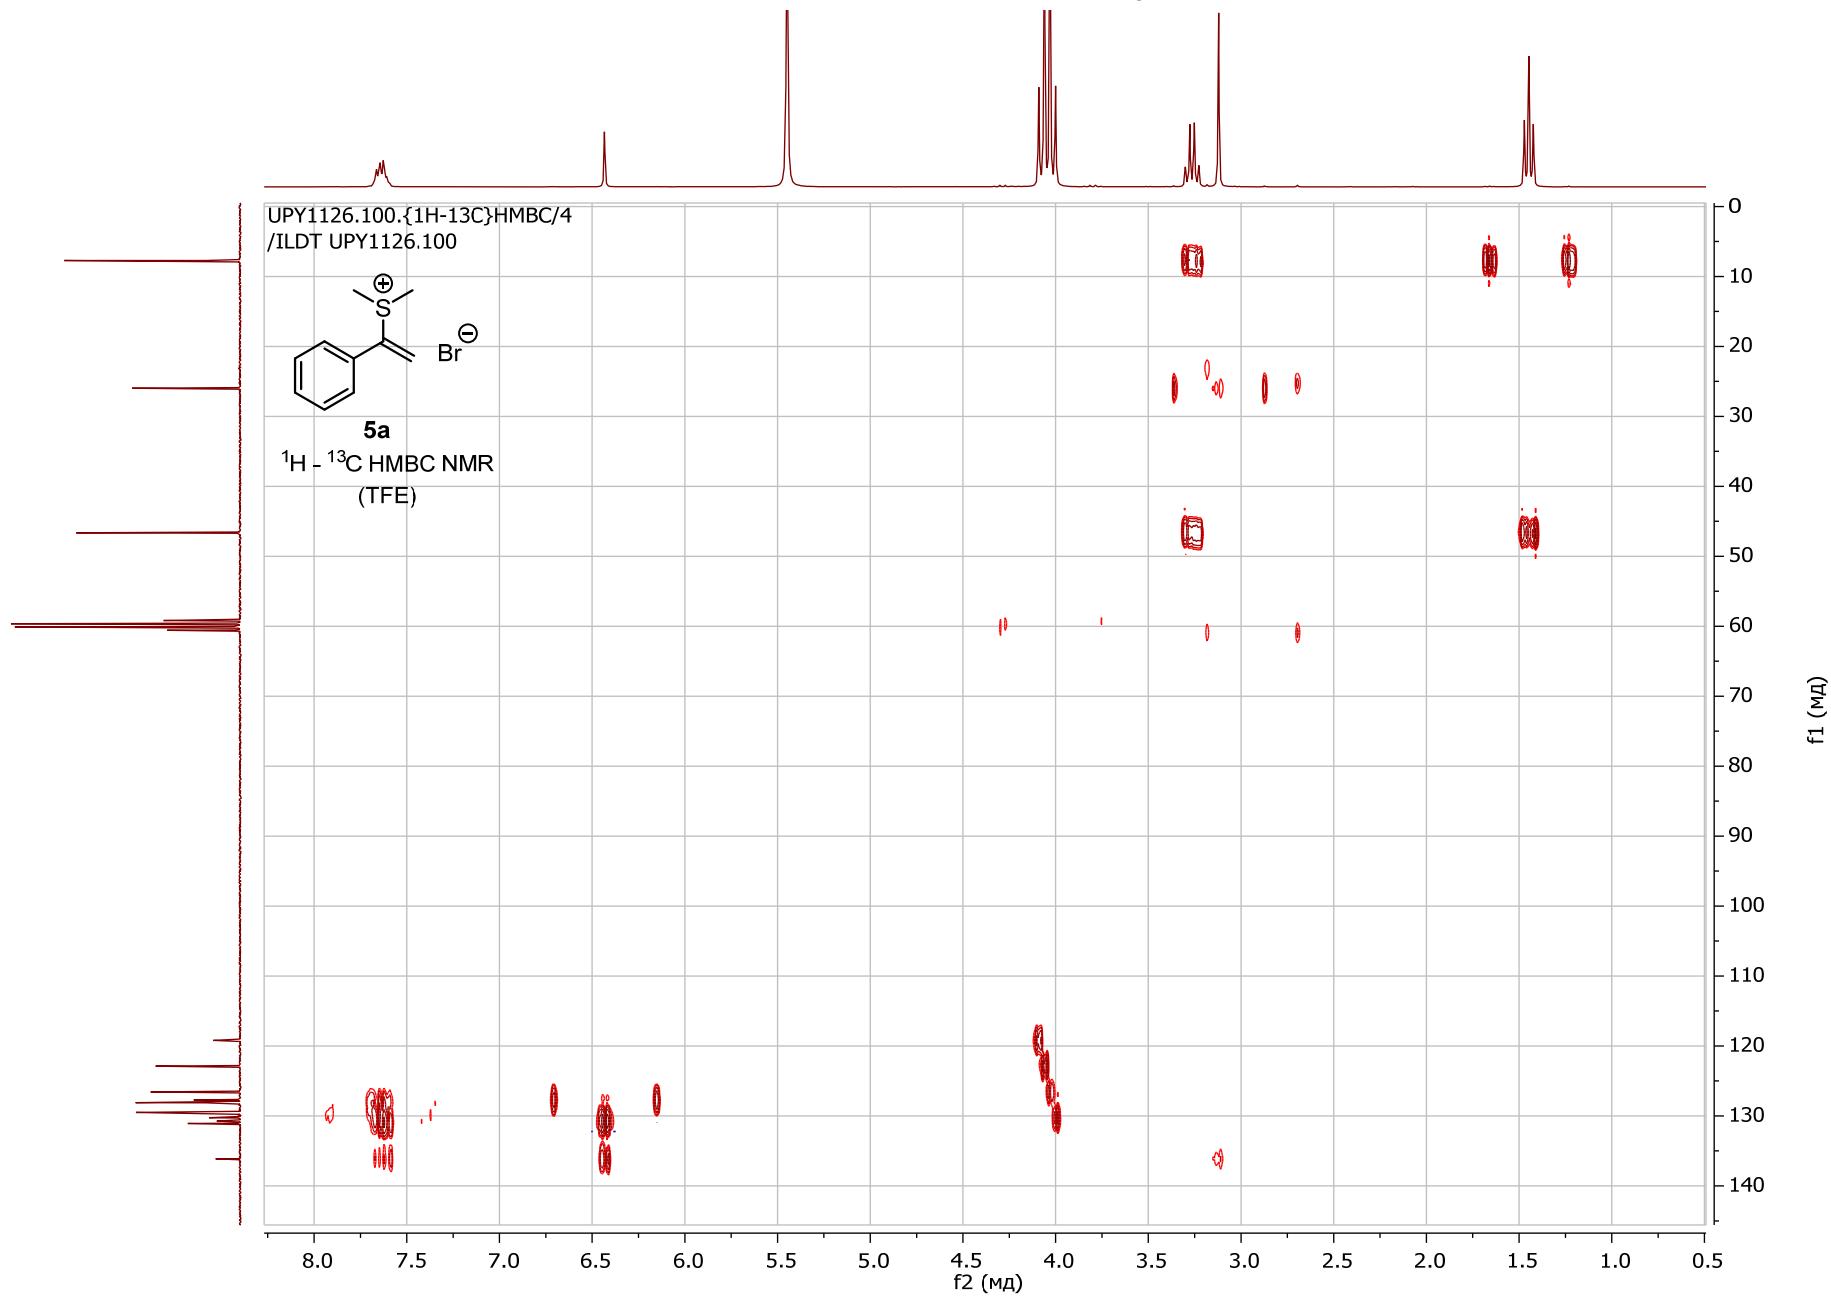

NMR of **4b**

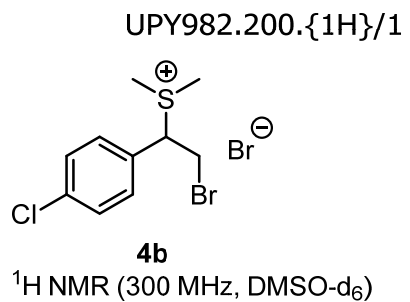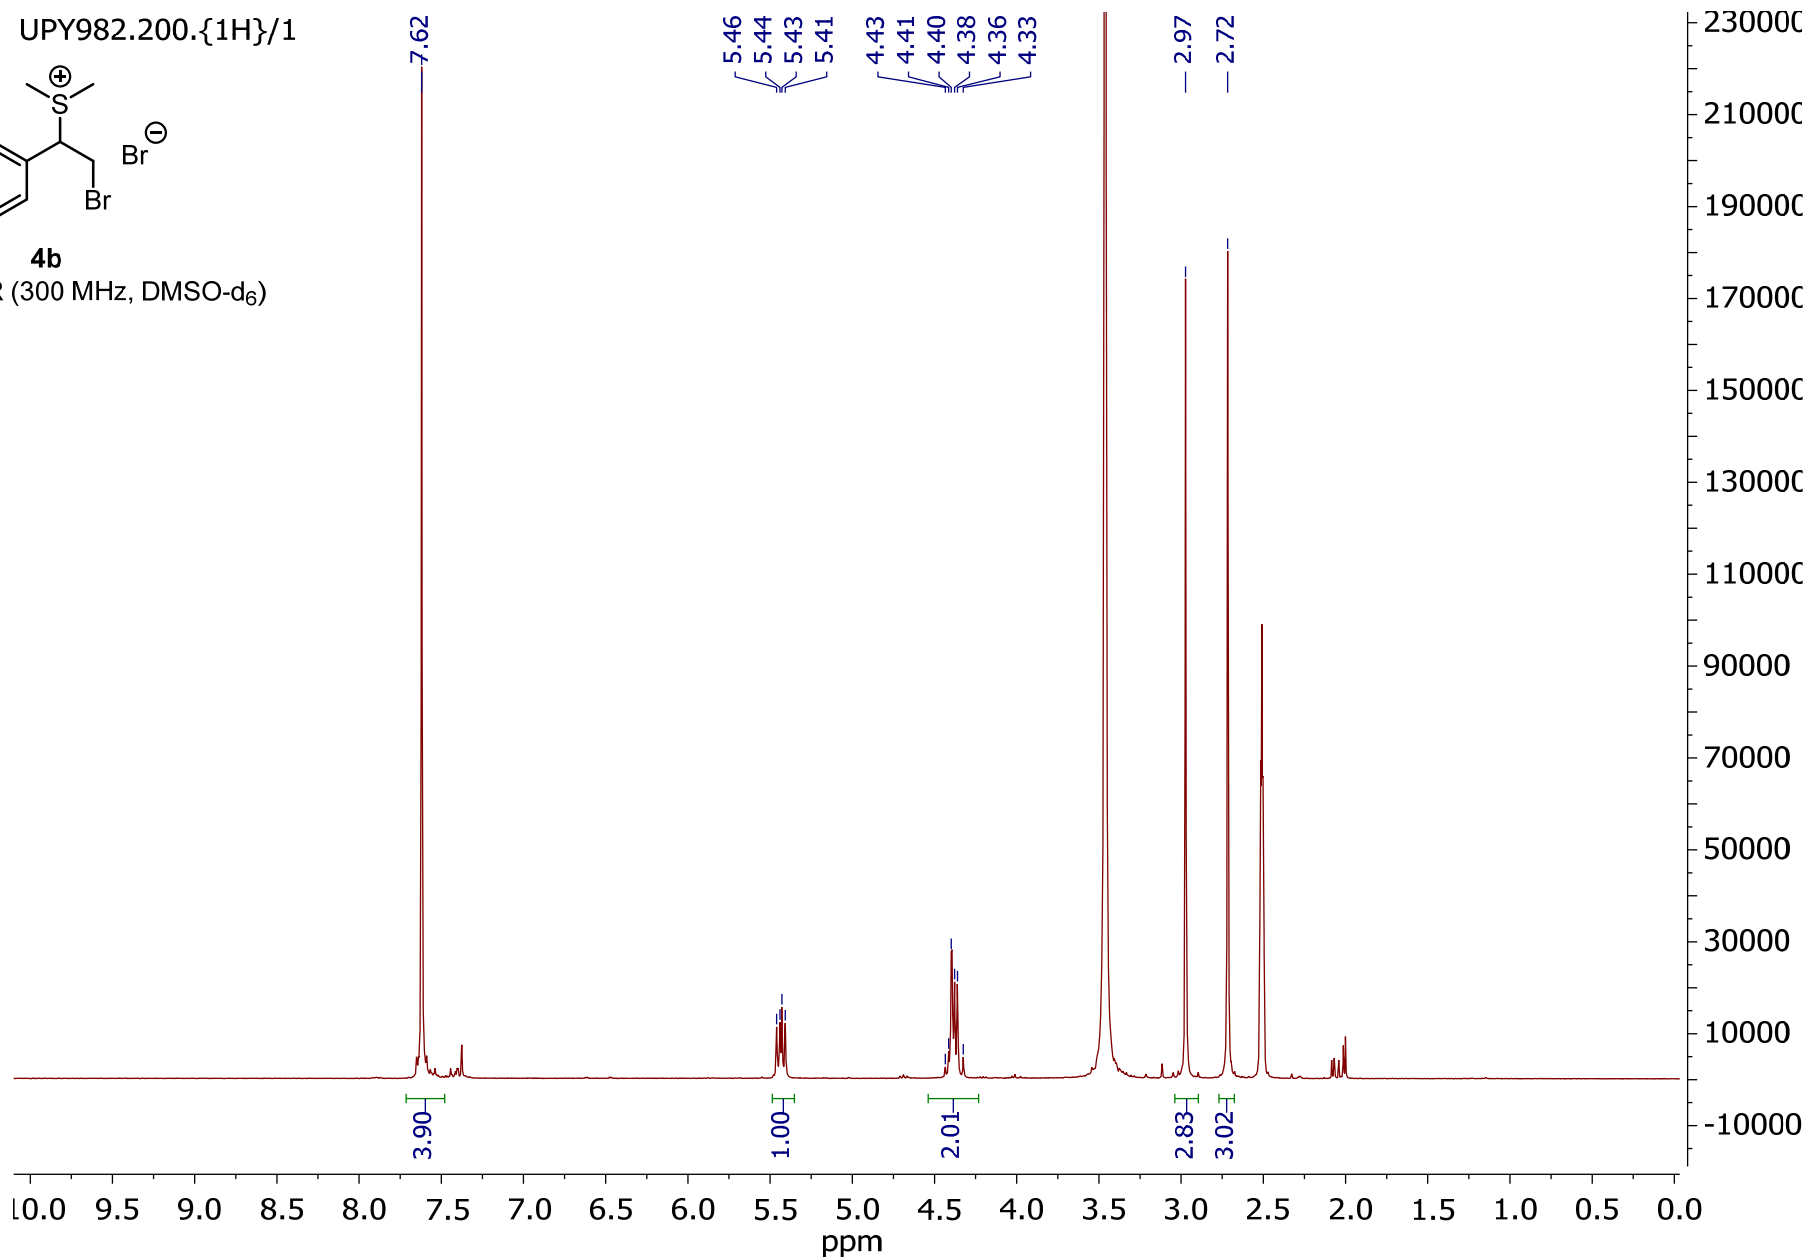

NMR of **4b**

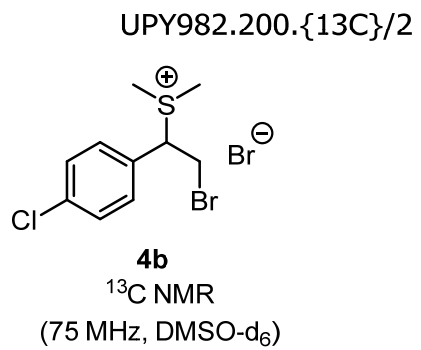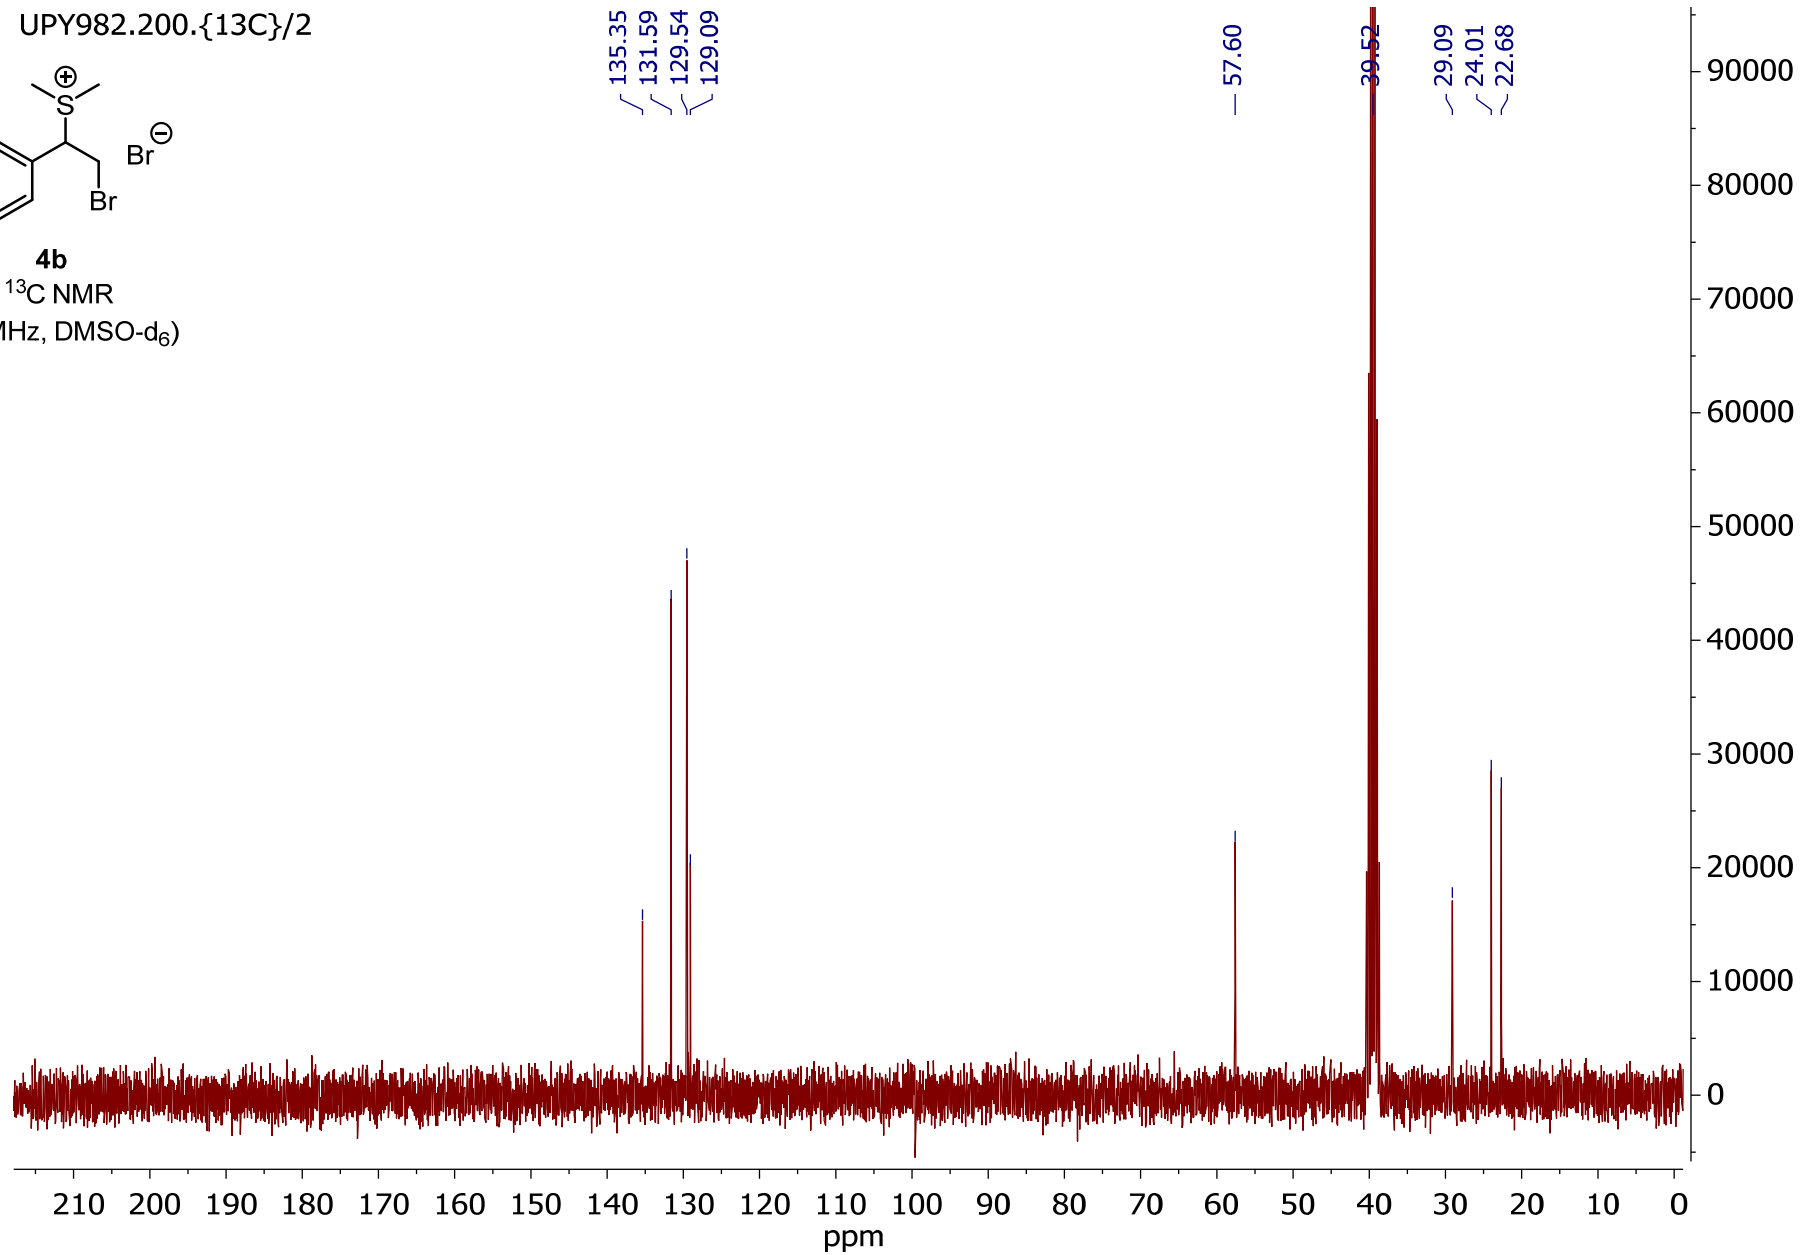

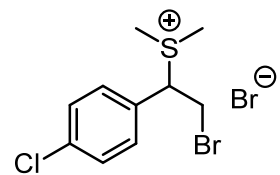

**4b**

$^{13}\text{C}$  DEPT NMR  
(75 MHz, DMSO- $d_6$ )

NMR of **4b**

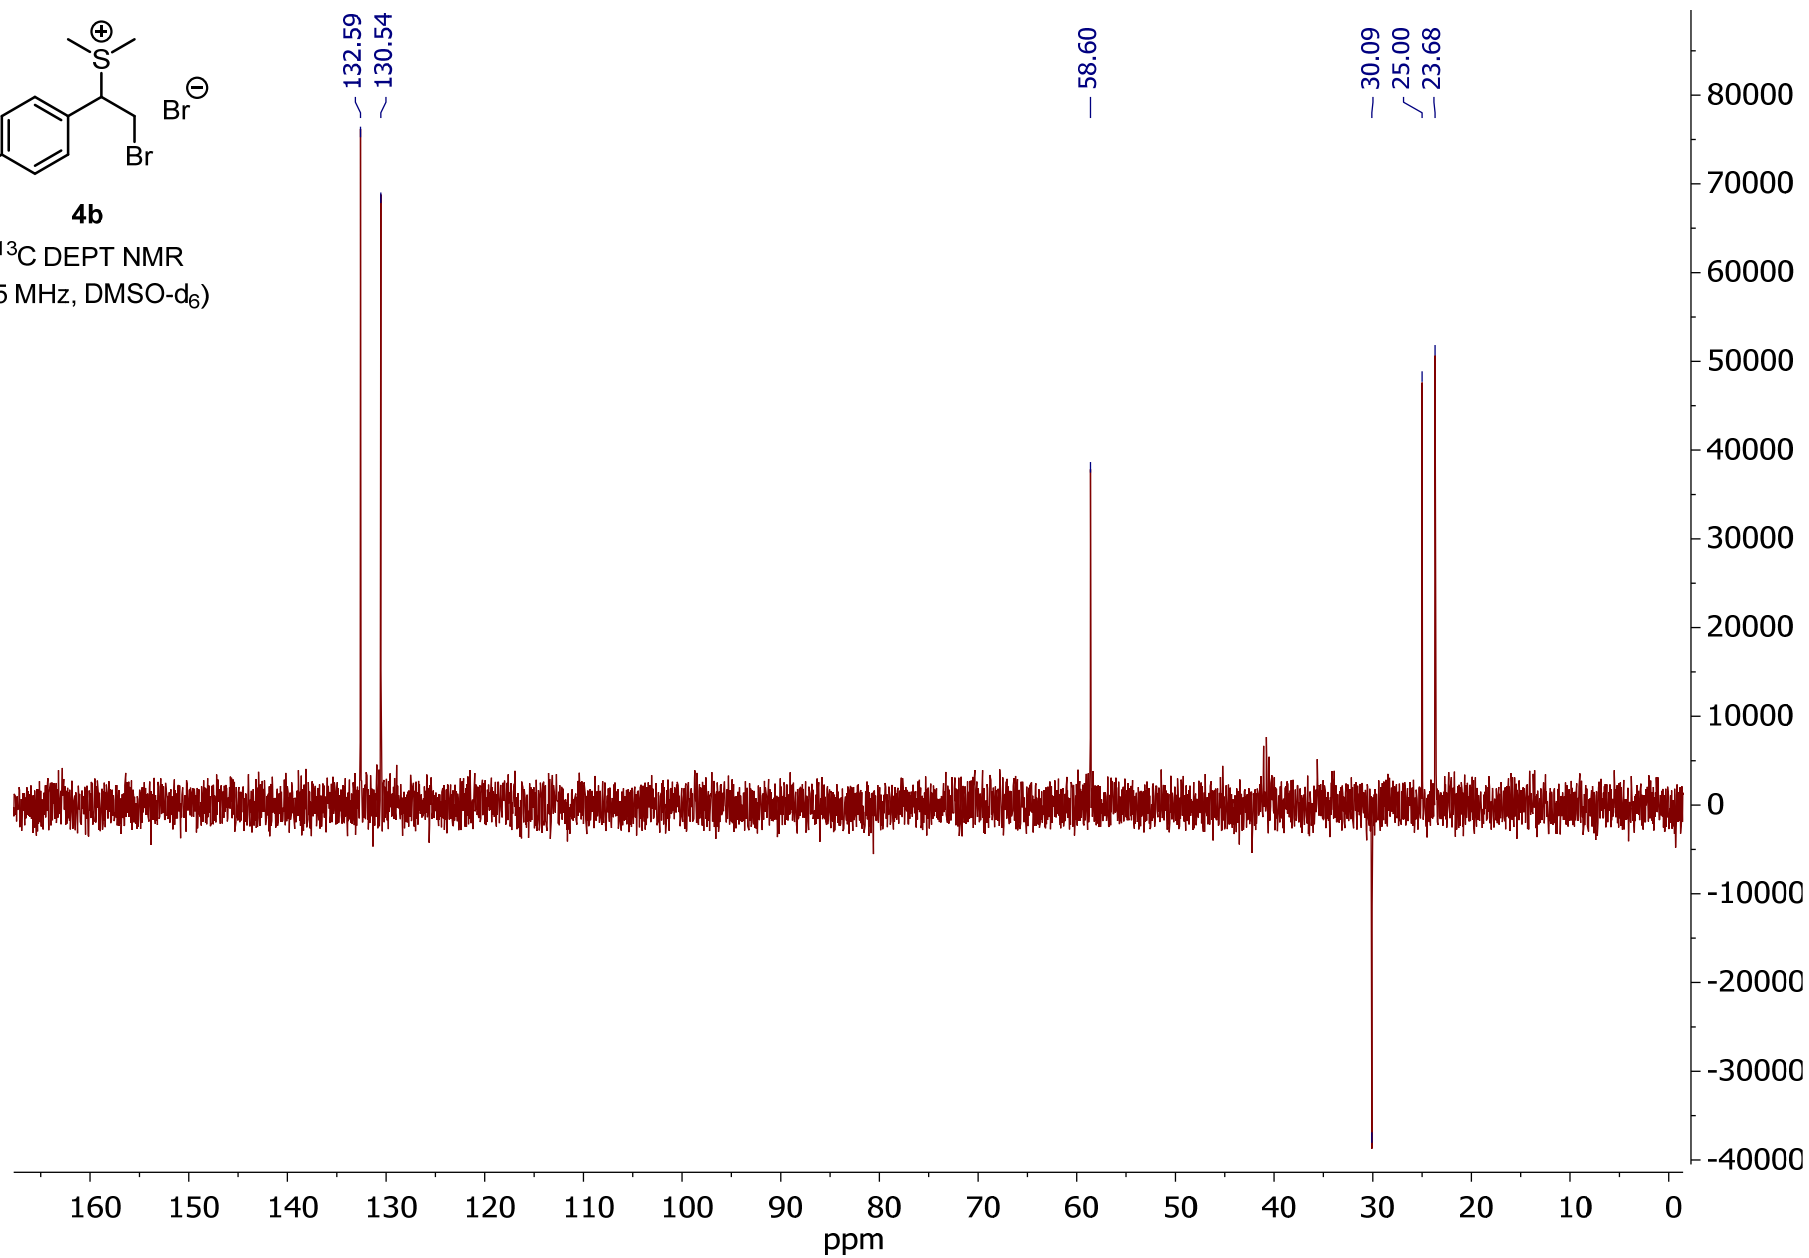

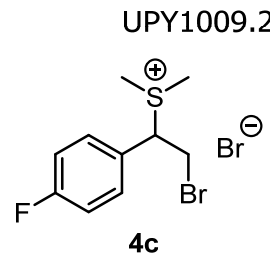

<sup>1</sup>H NMR (300 MHz, DMSO-d<sub>6</sub>)

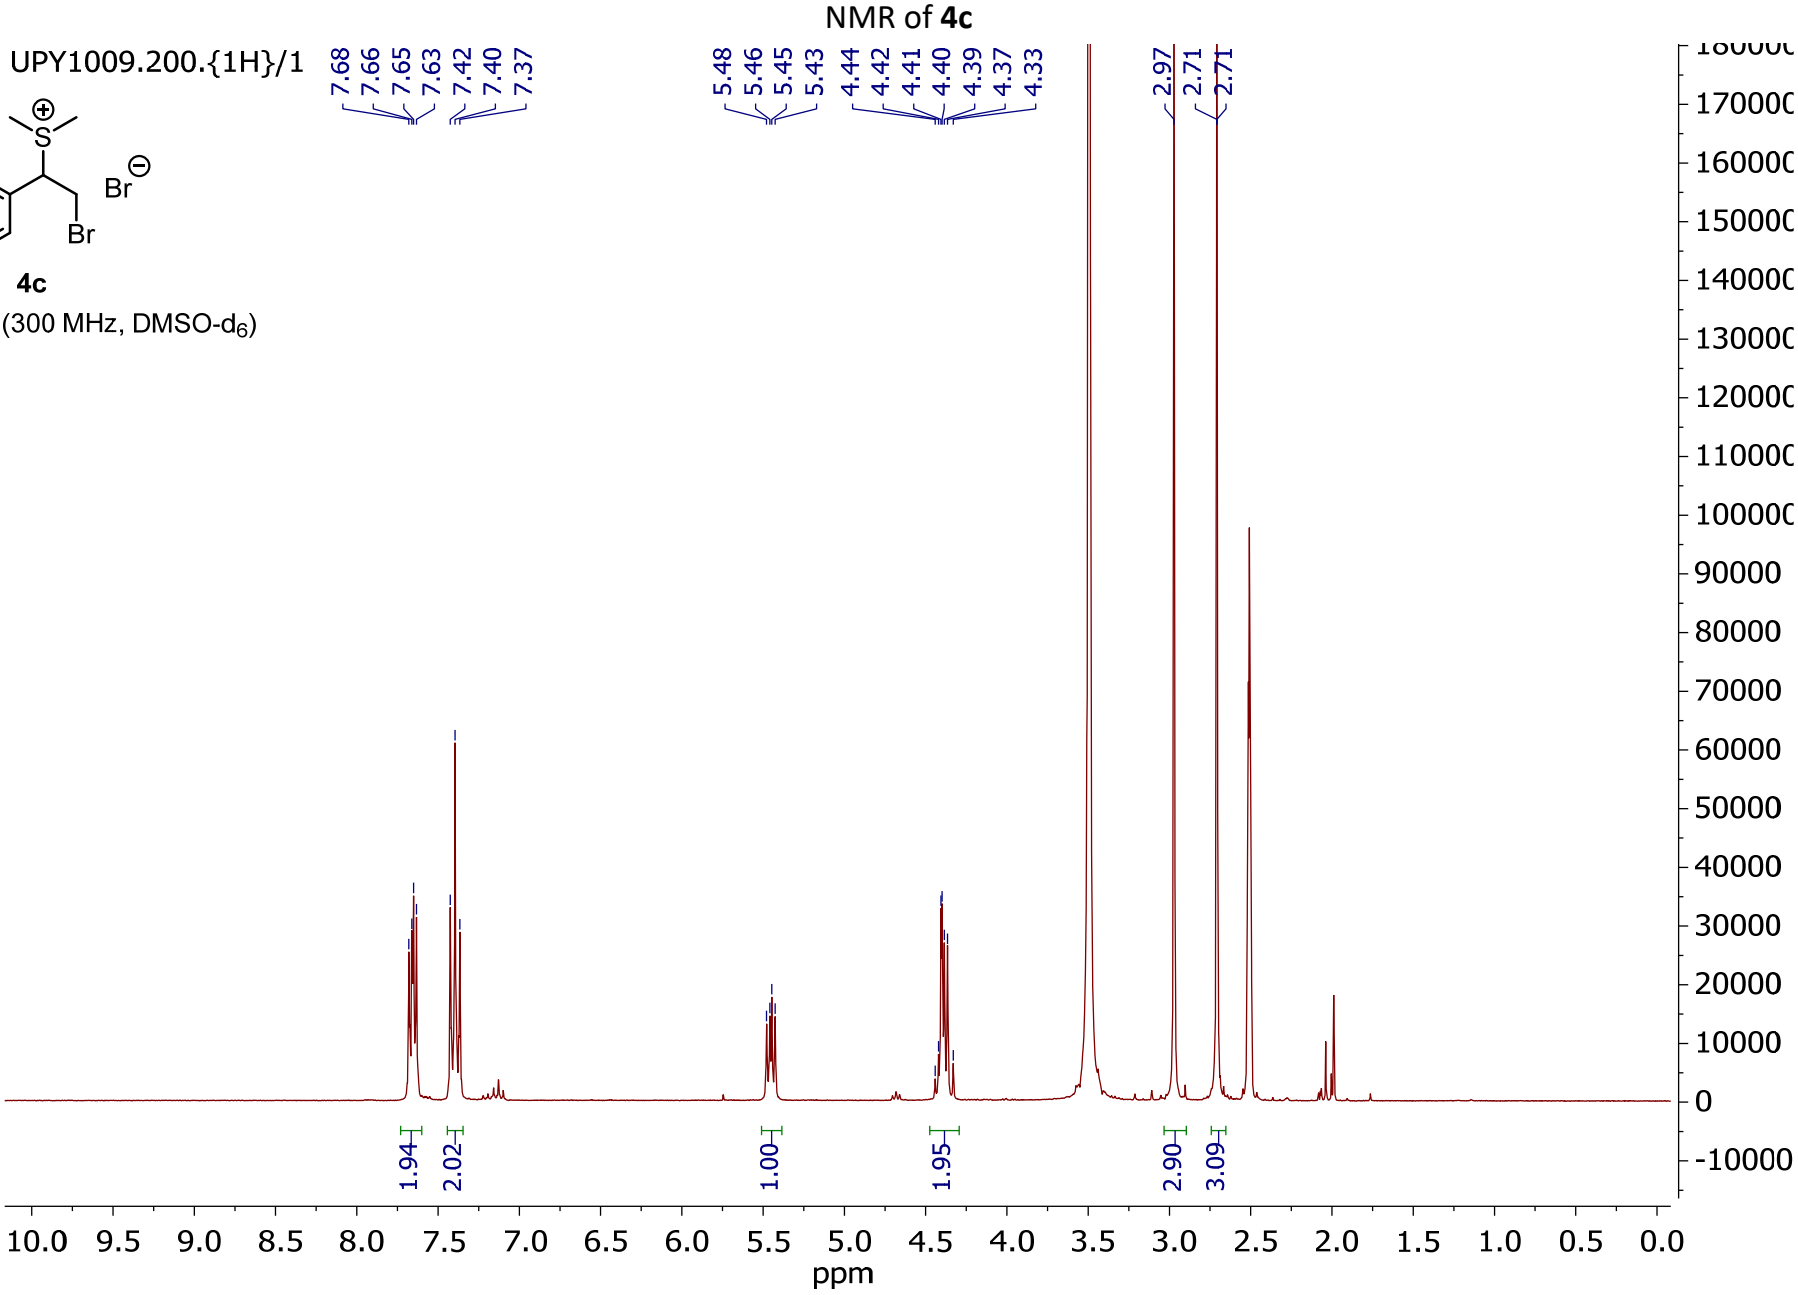

NMR of 4c

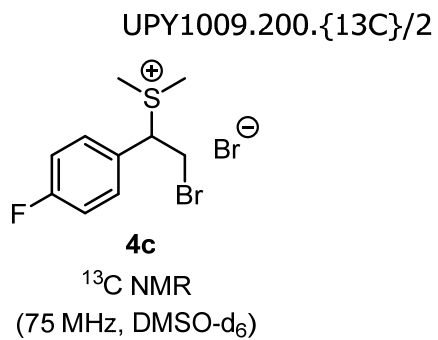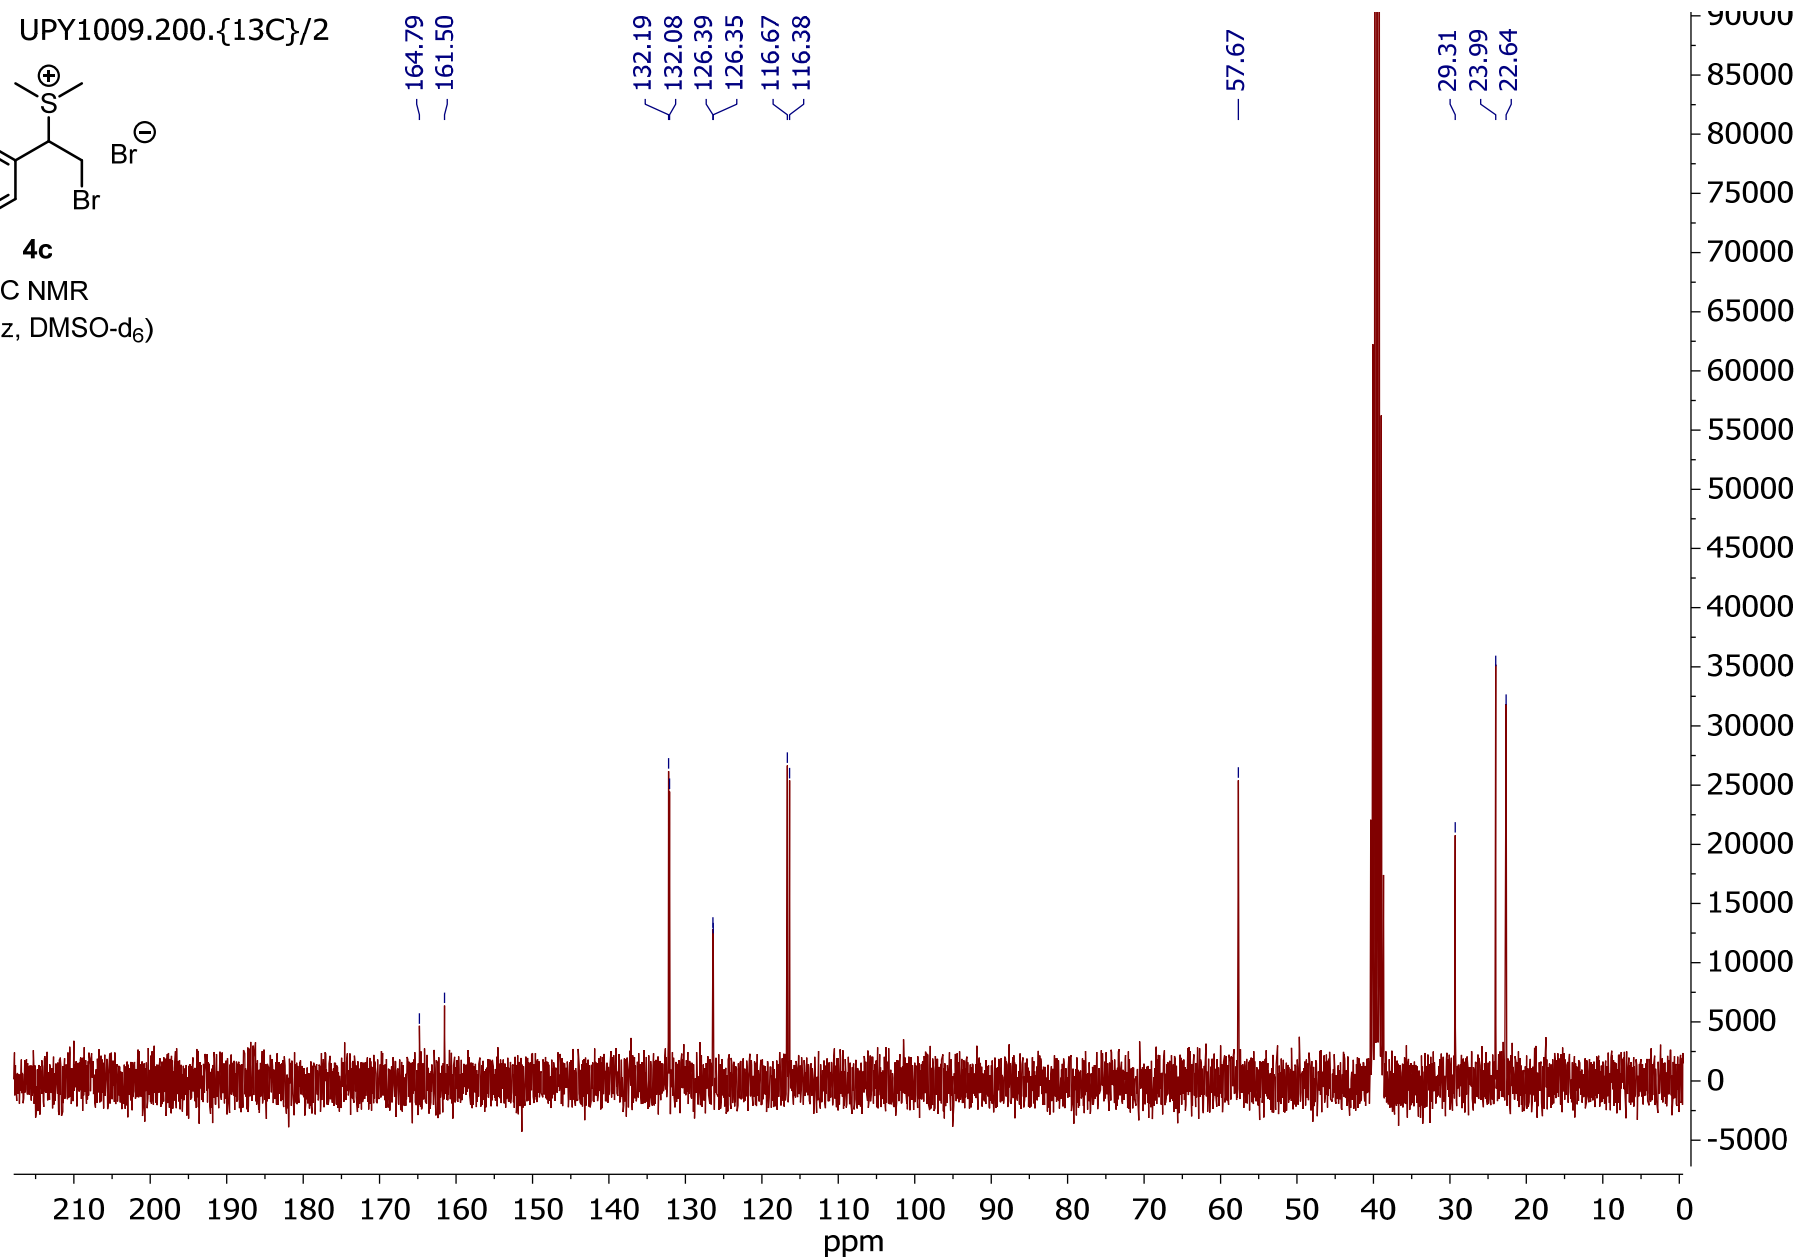

NMR of 4c

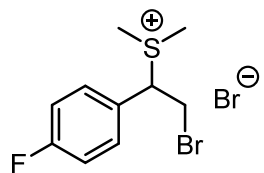

4c

<sup>13</sup>C DEPT NMR  
(75 MHz, DMSO-d<sub>6</sub>)

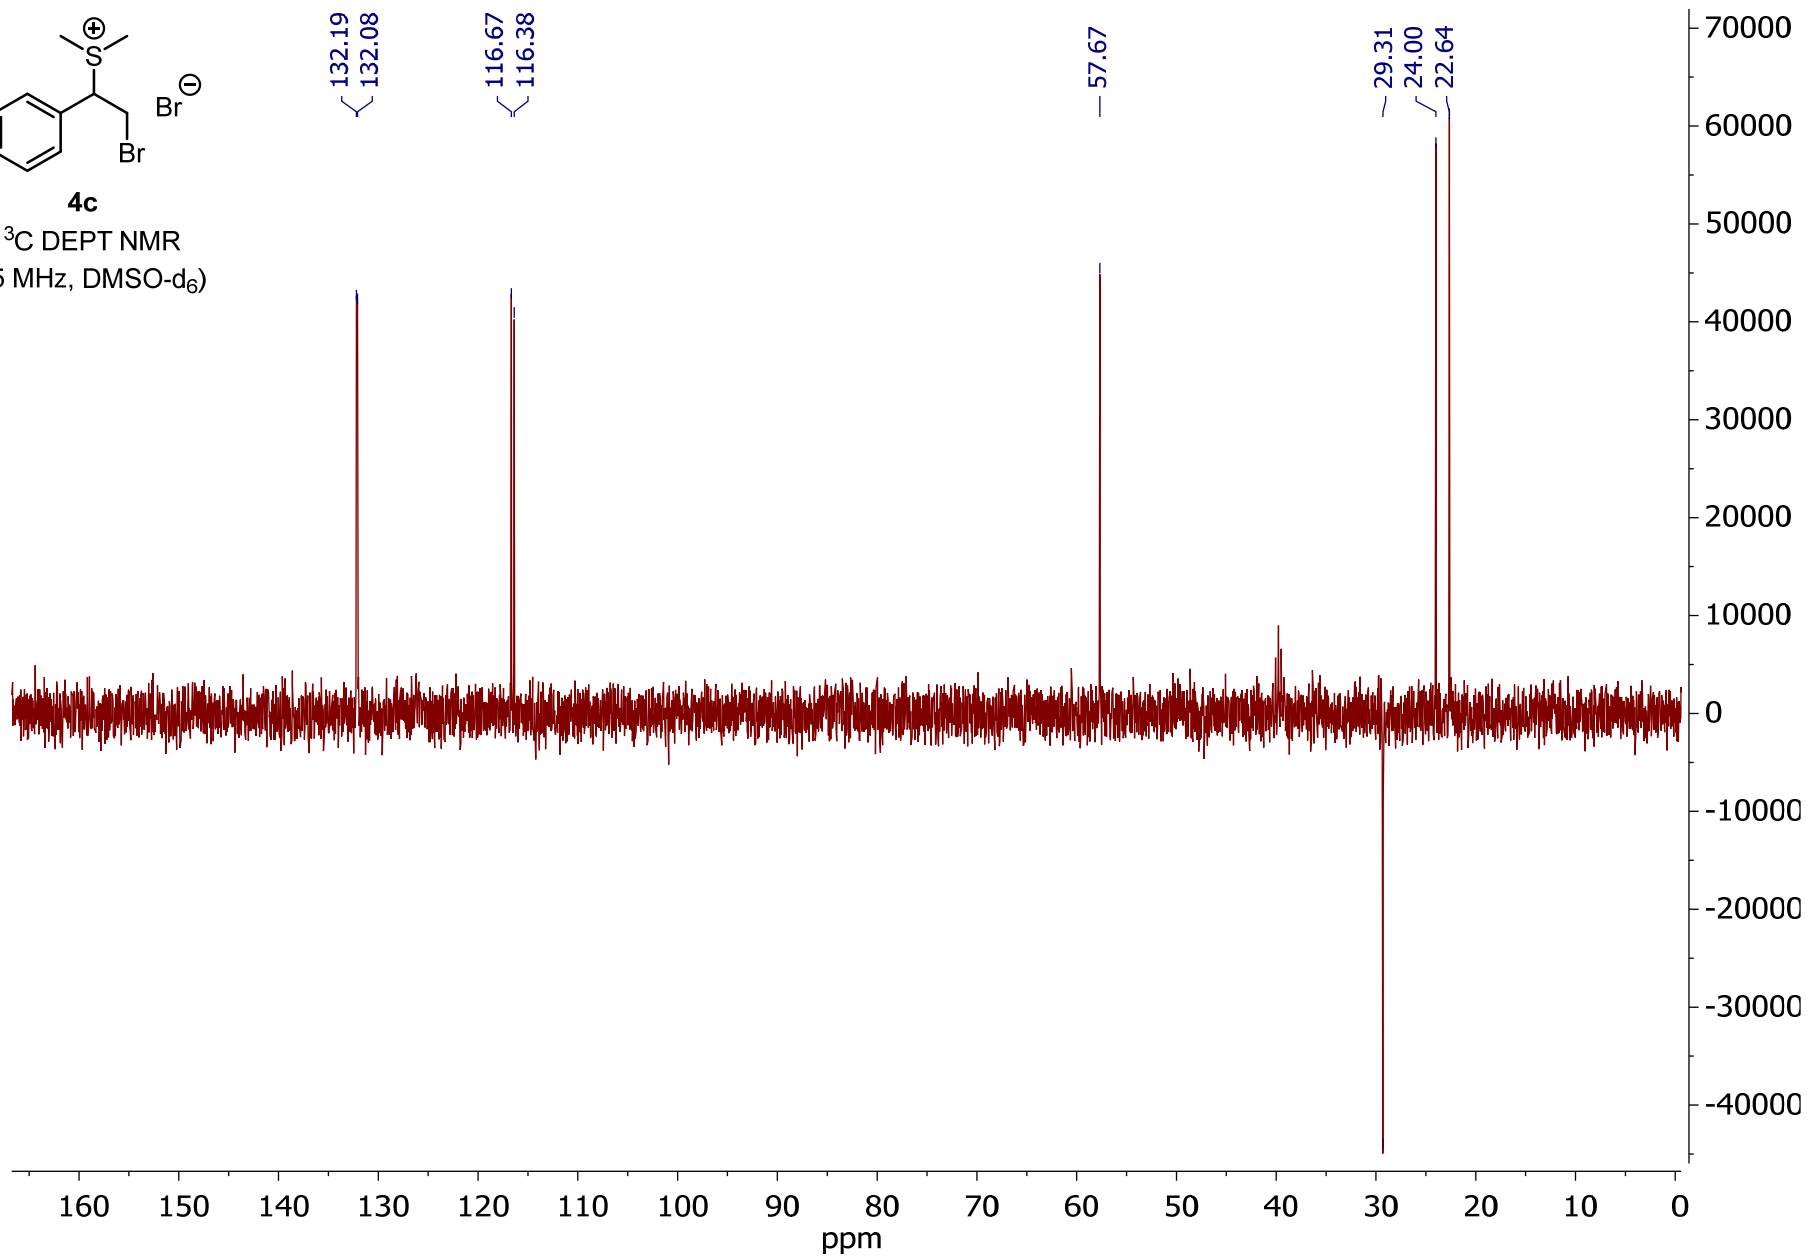



UPY1009.200.{19F}/19

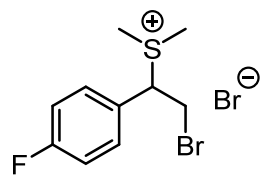

**4c**

<sup>19</sup>F NMR (282 MHz, DMSO-d<sub>6</sub>)

NMR of **4c**

-109.73  
-109.75  
-109.76  
-109.77  
-109.78  
-109.79  
-109.80  
-109.81  
-109.83

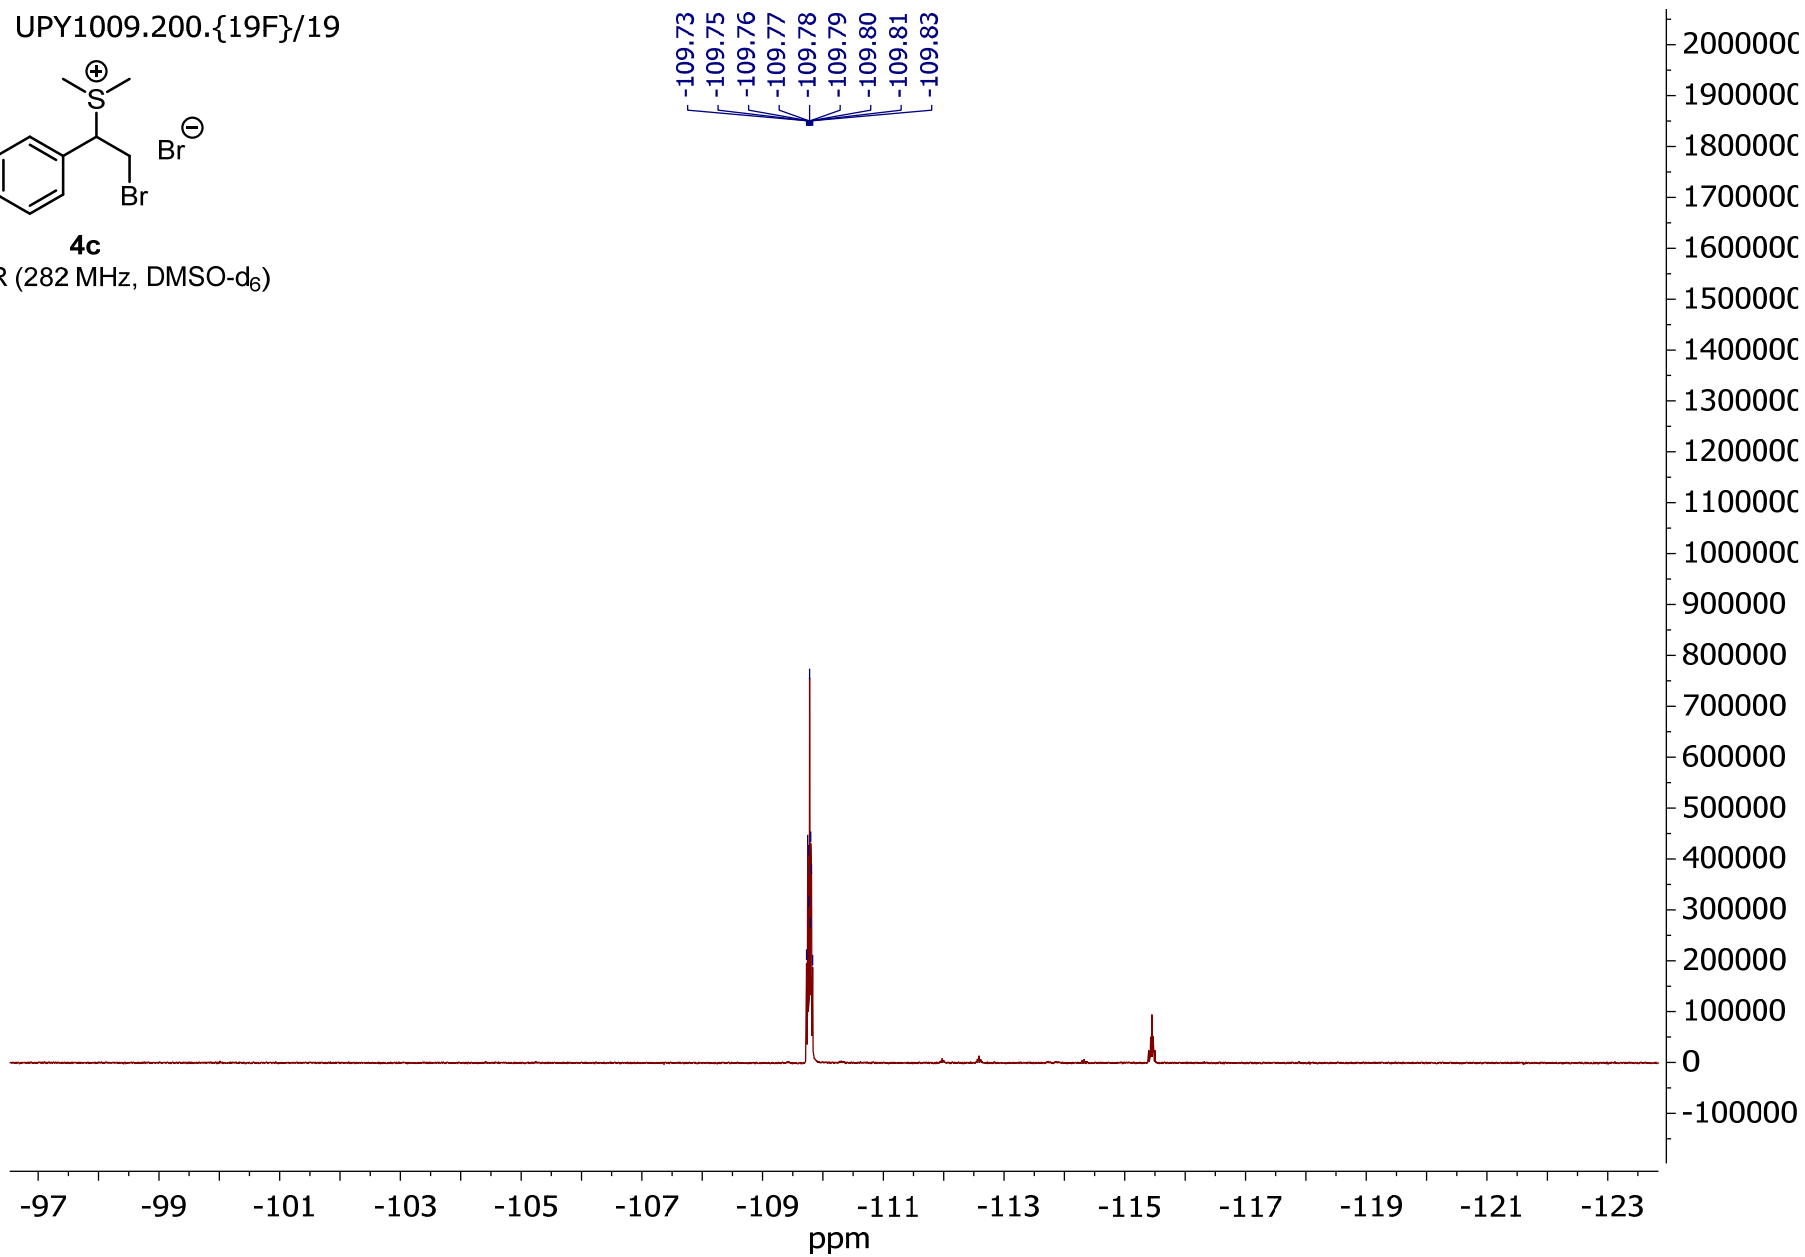

# FTIR (ATR) of 4c

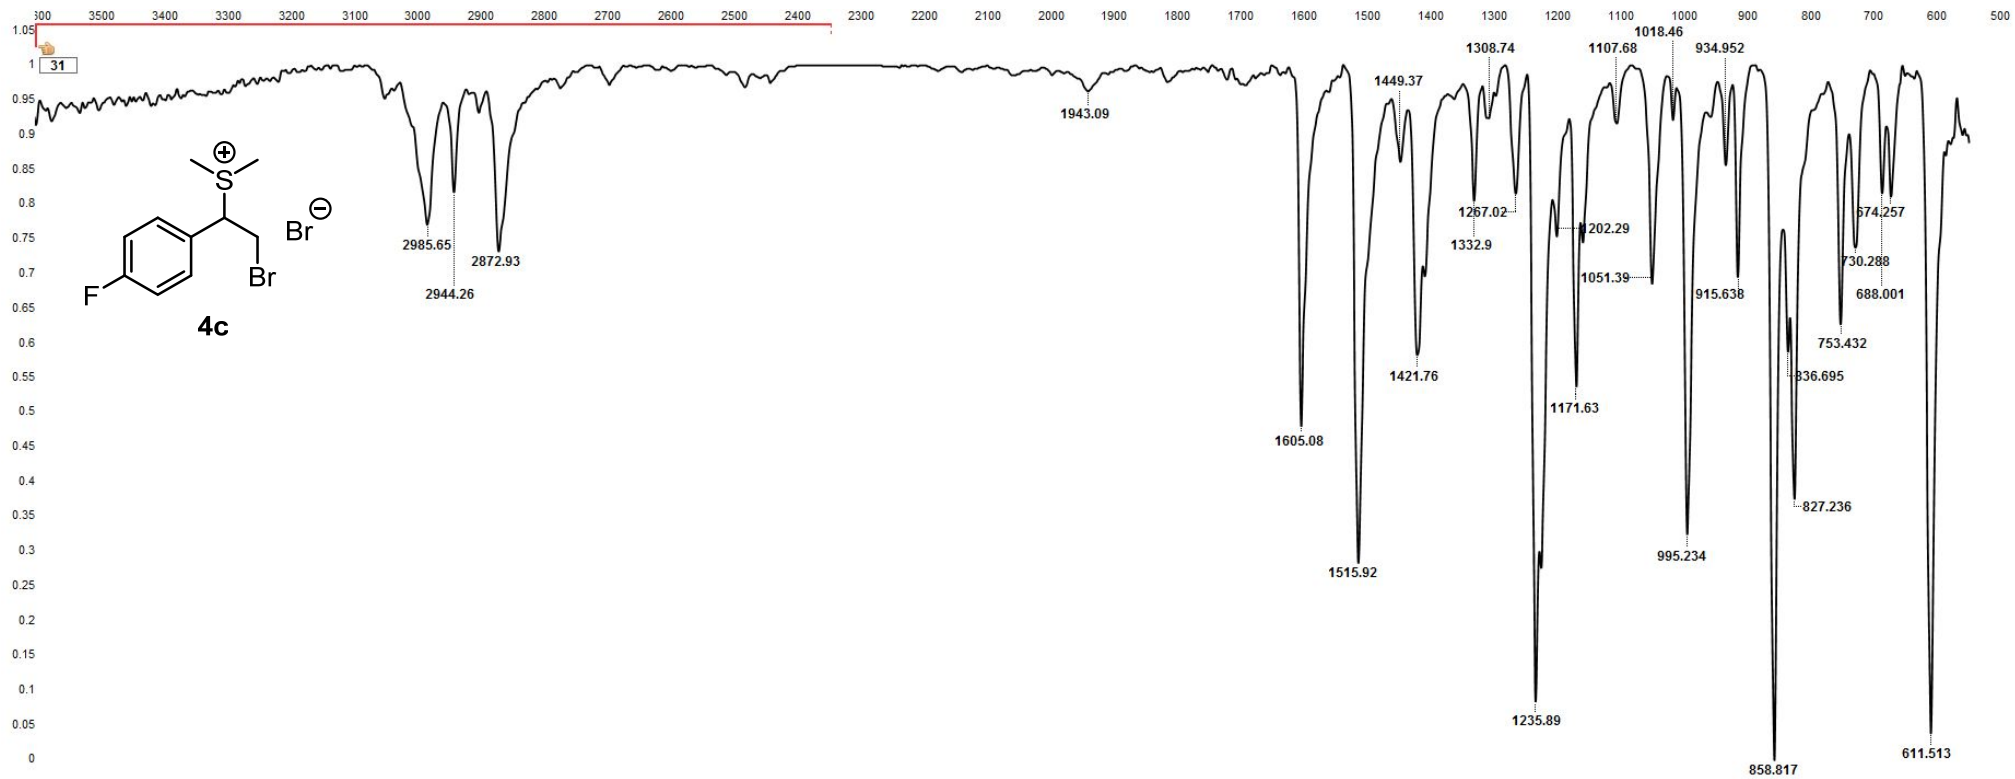

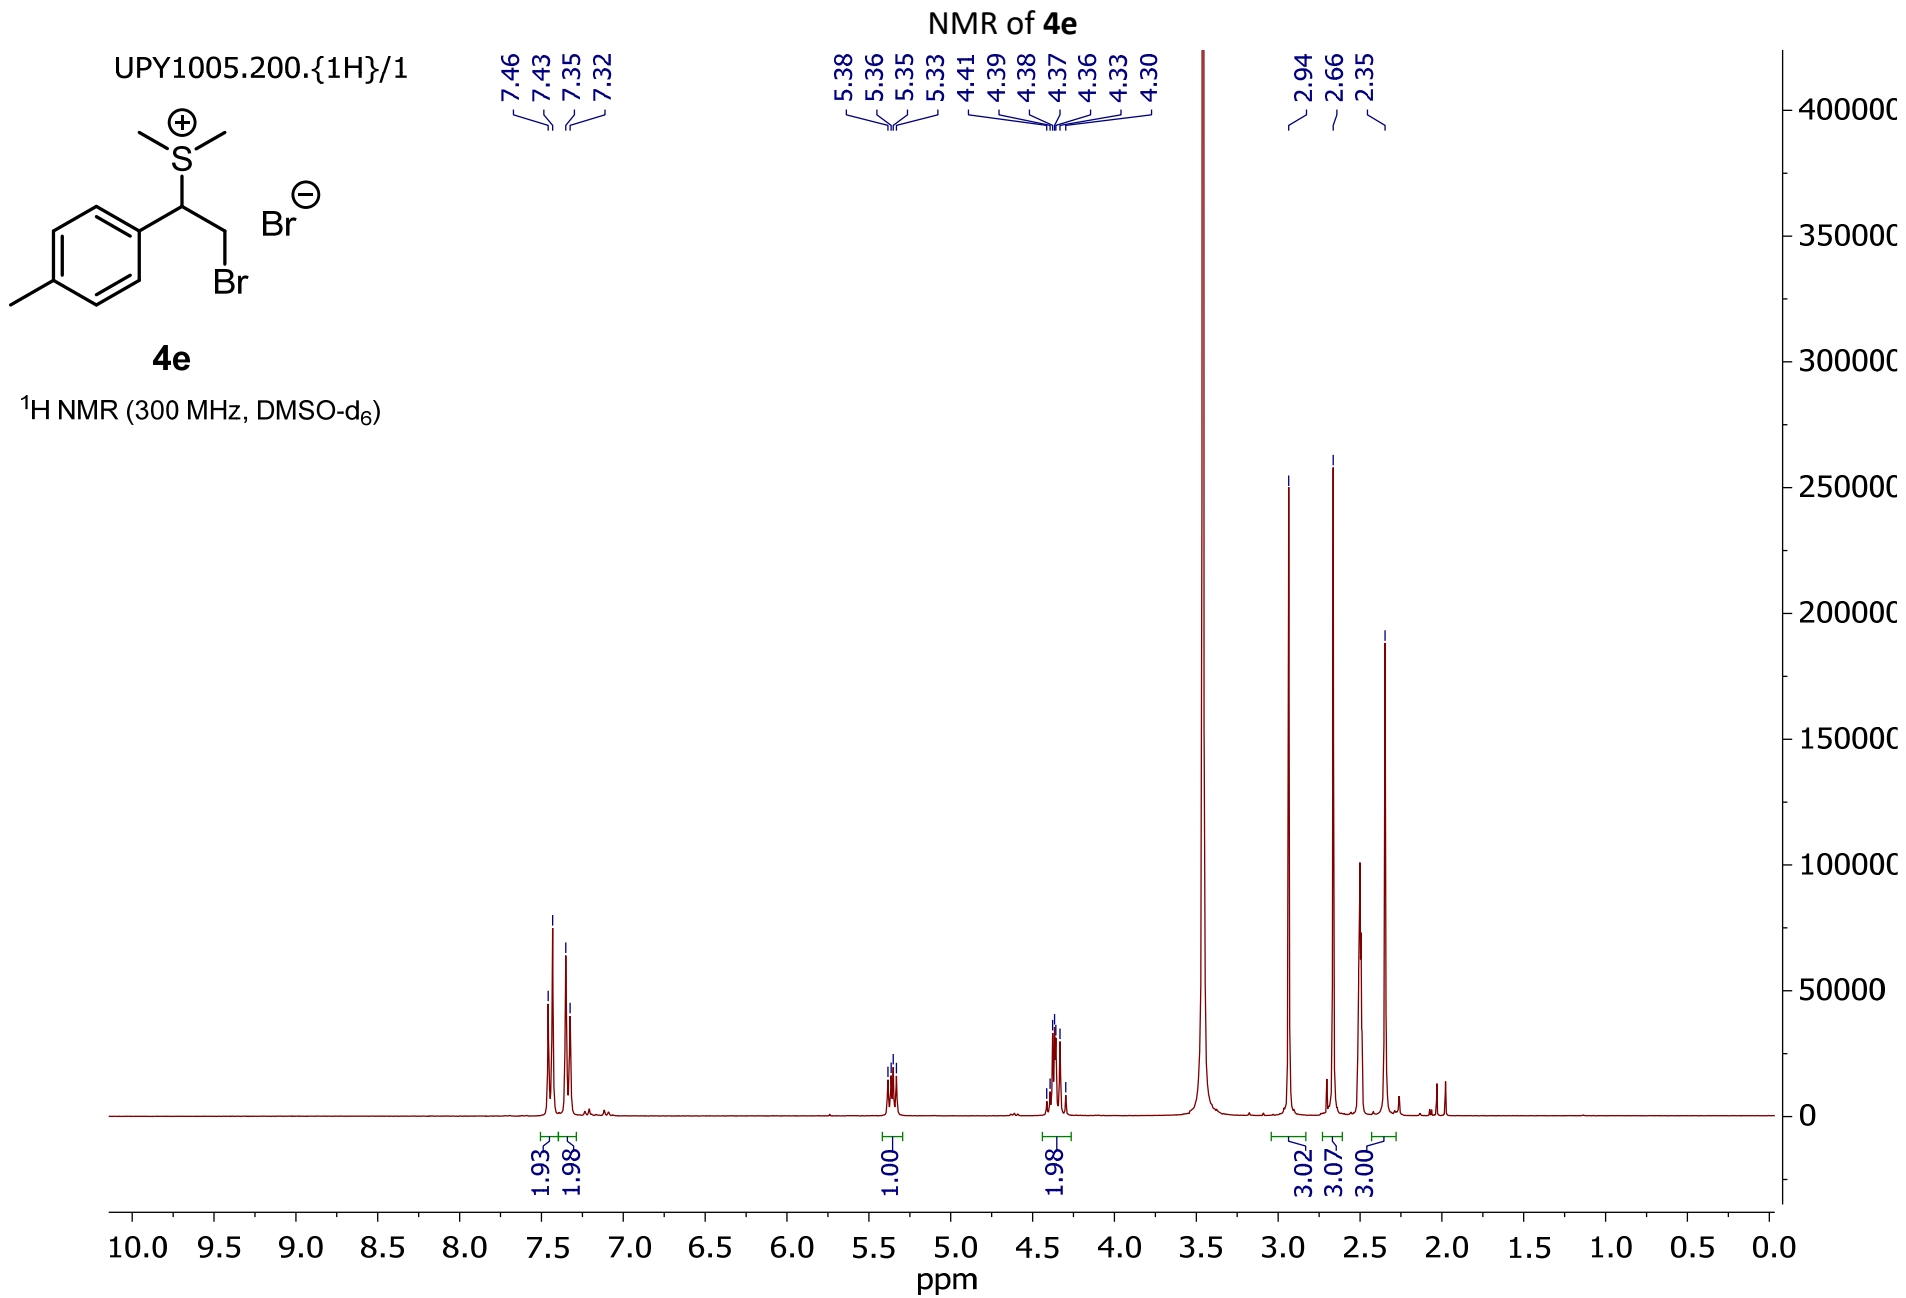

NMR of 4e

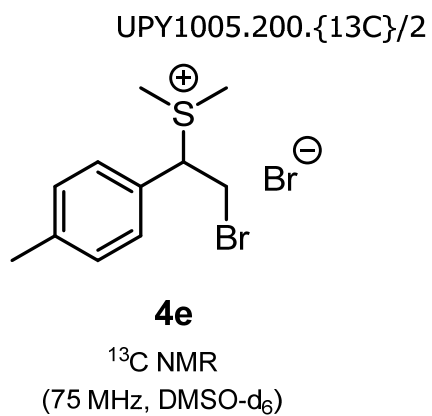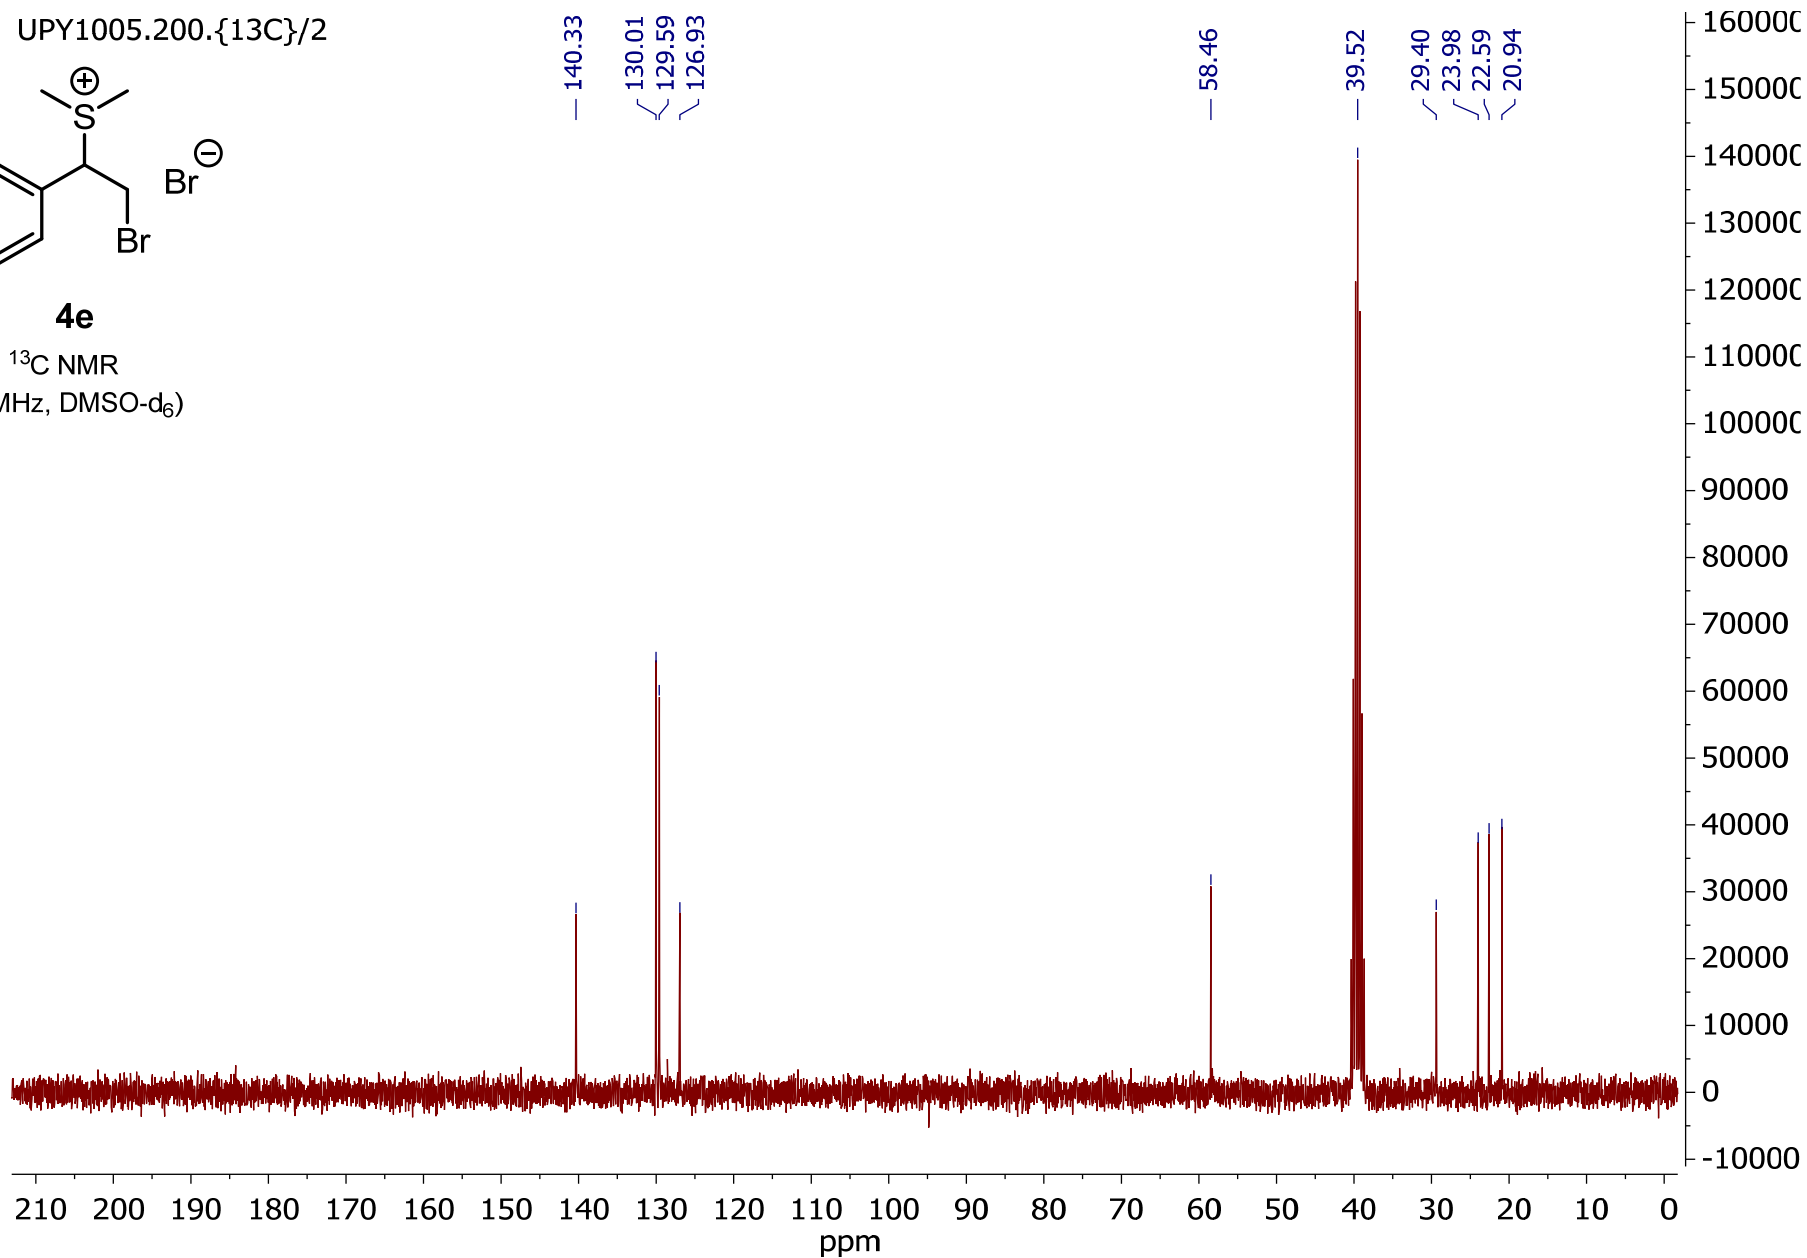

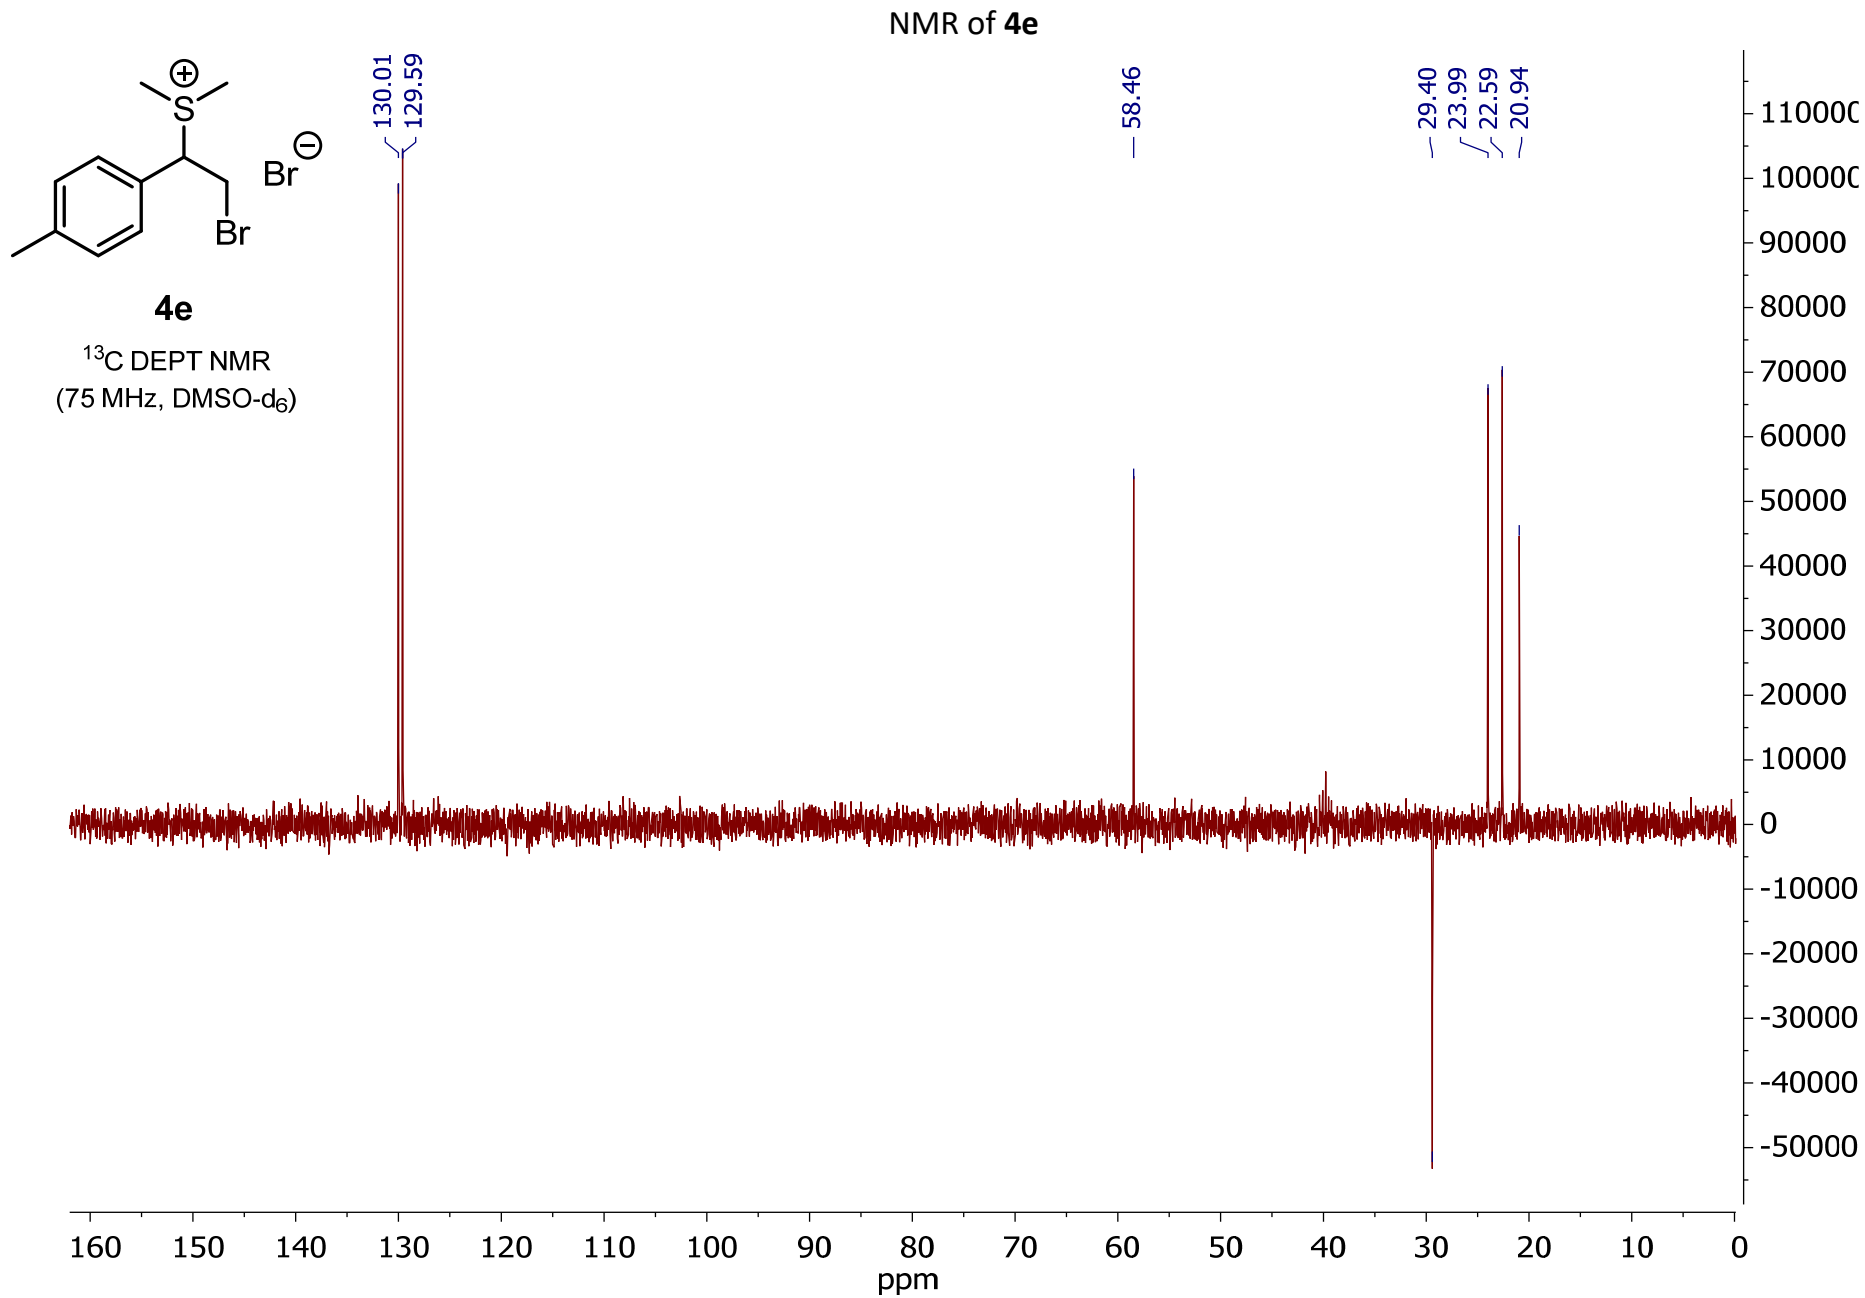

# FTIR (ATR) of 4e

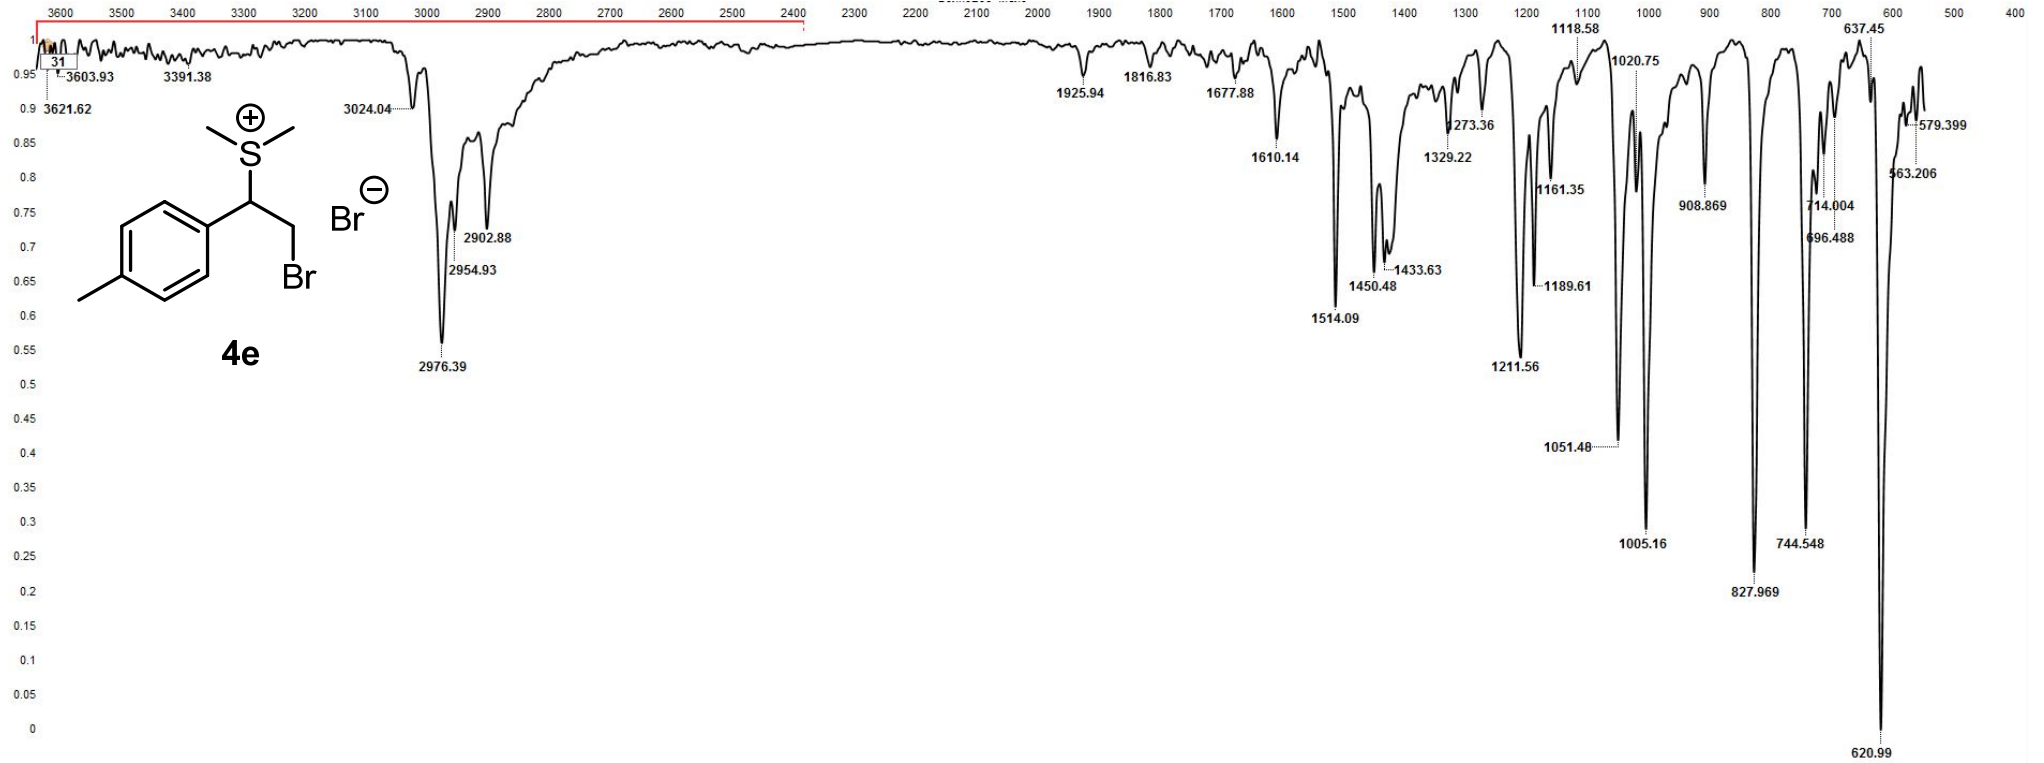

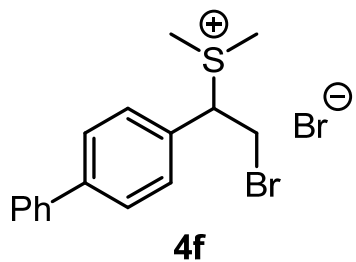

<sup>1</sup>H NMR (300 MHz, DMSO-d<sub>6</sub>)

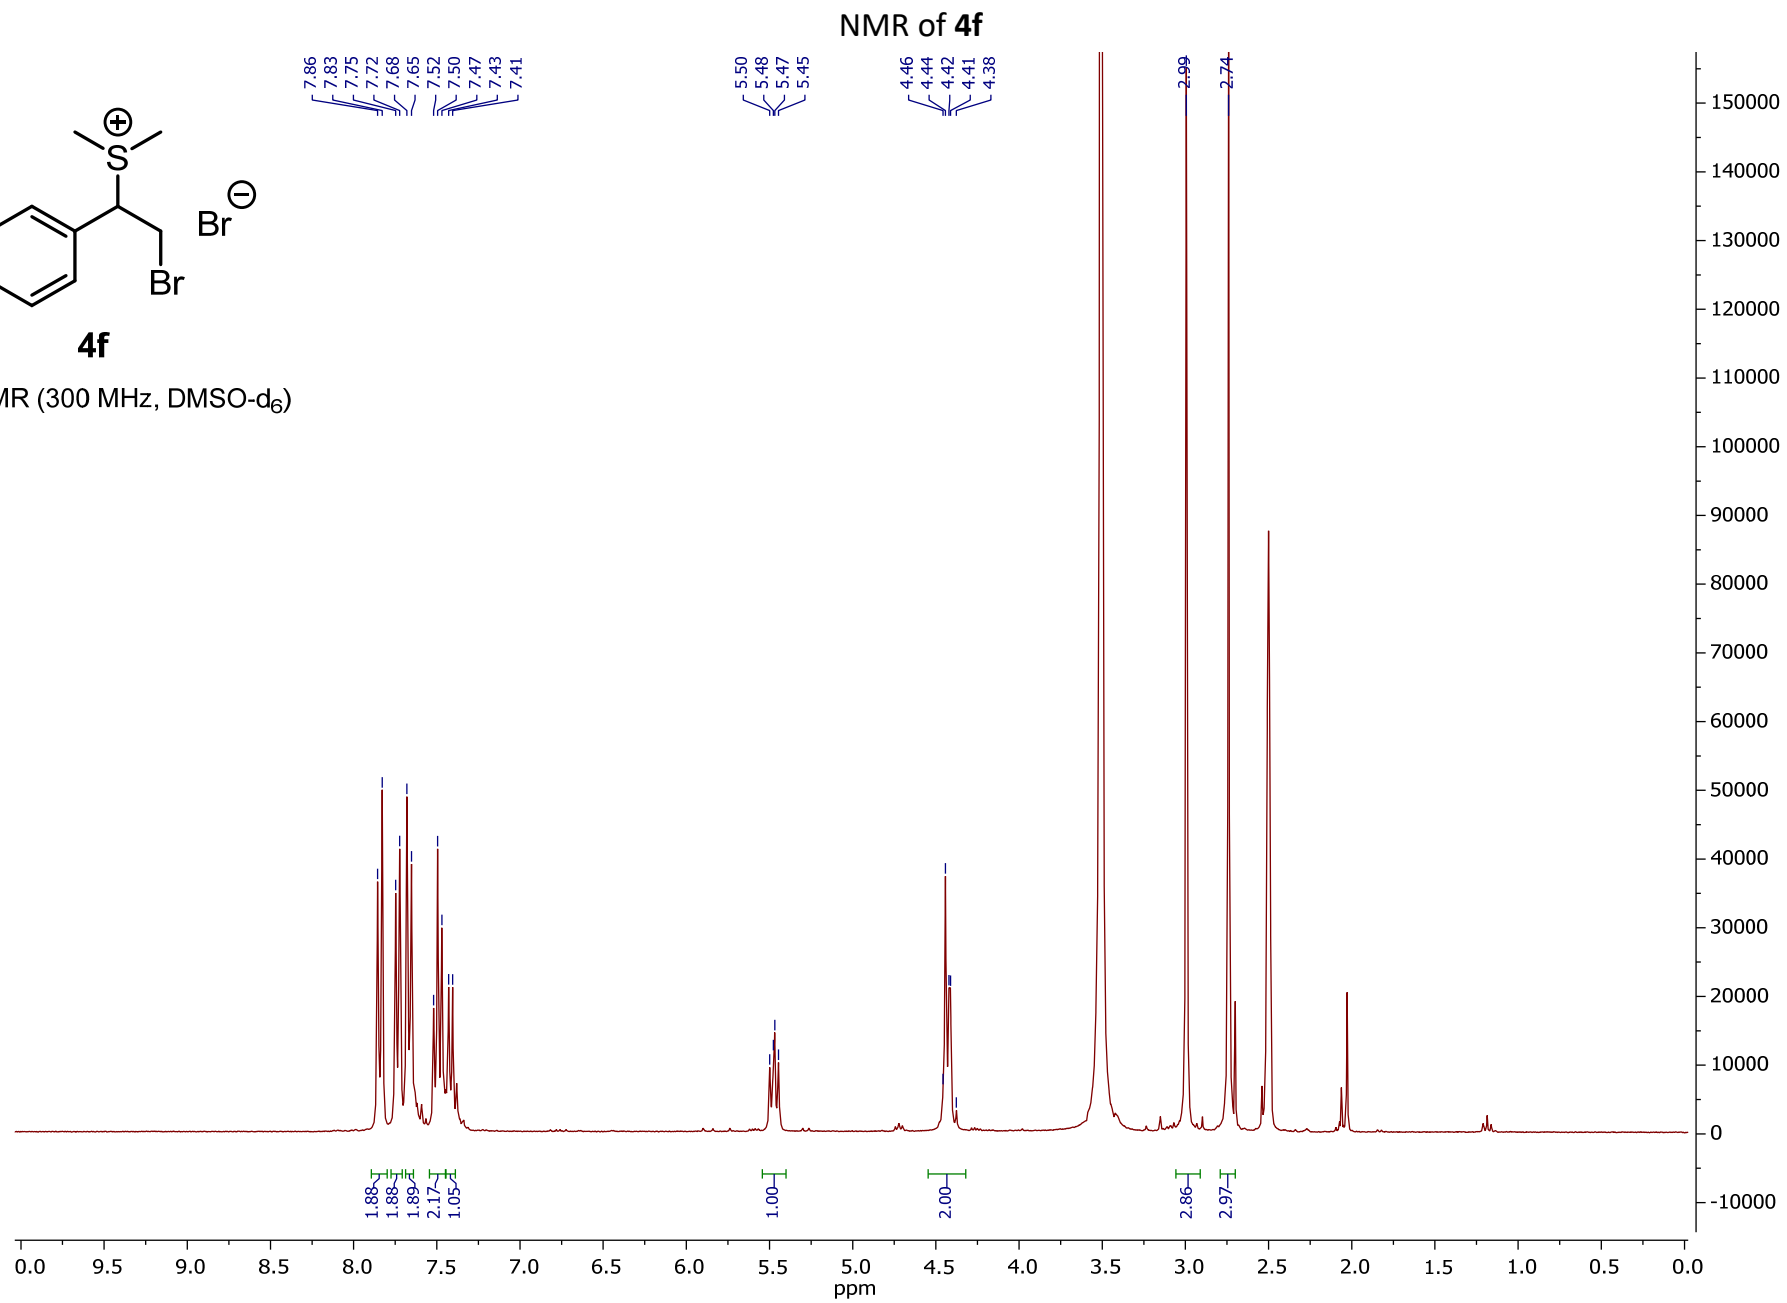

NMR of 4f

UPY1017.200.{13C}/2

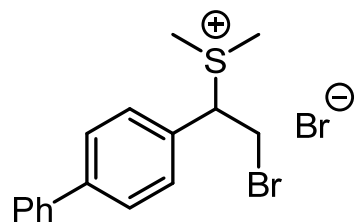

**4f**

<sup>13</sup>C NMR  
(75 MHz, DMSO-d<sub>6</sub>)

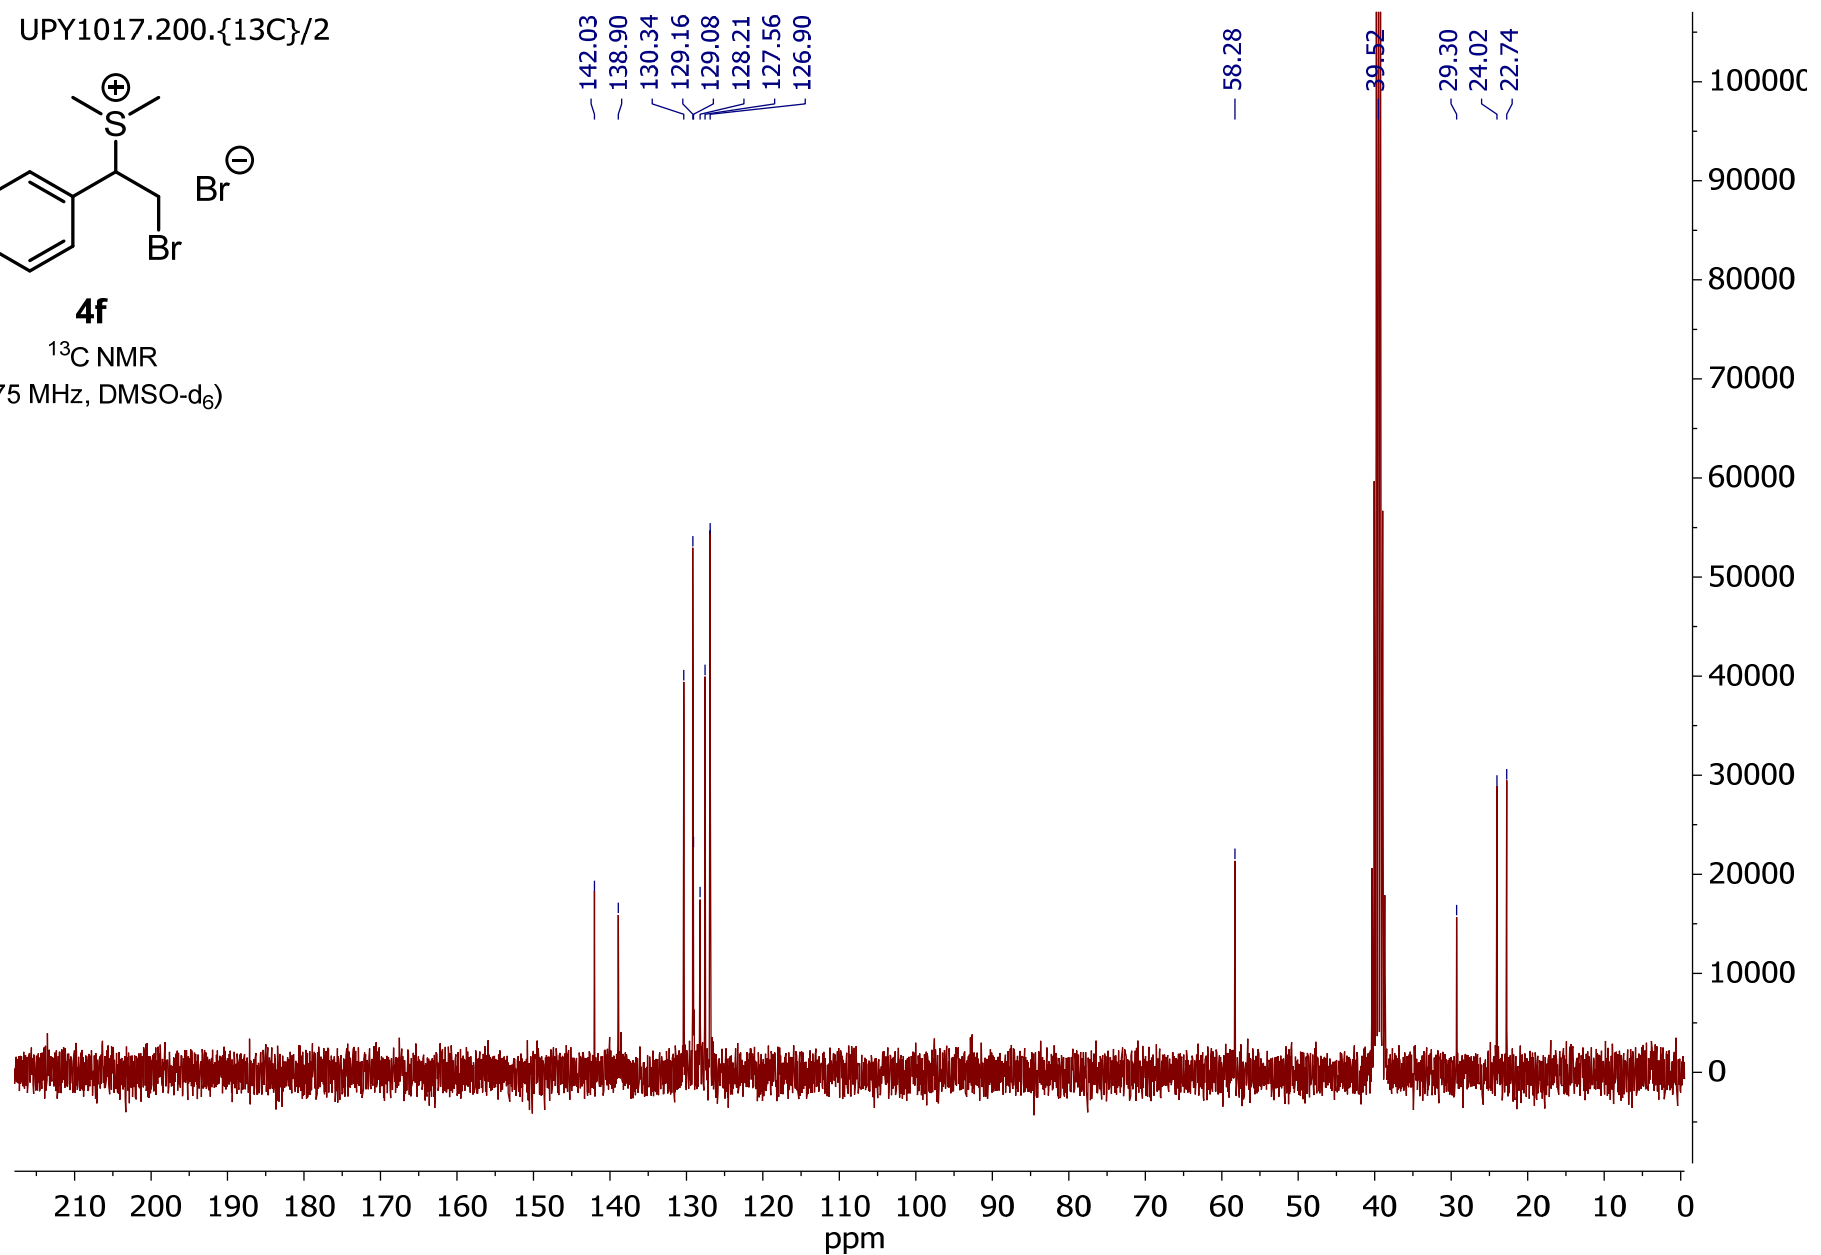



# NMR of 4f

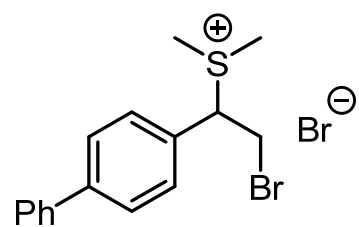

**4f**

<sup>13</sup>C DEPT NMR  
(75 MHz, DMSO-d<sub>6</sub>)

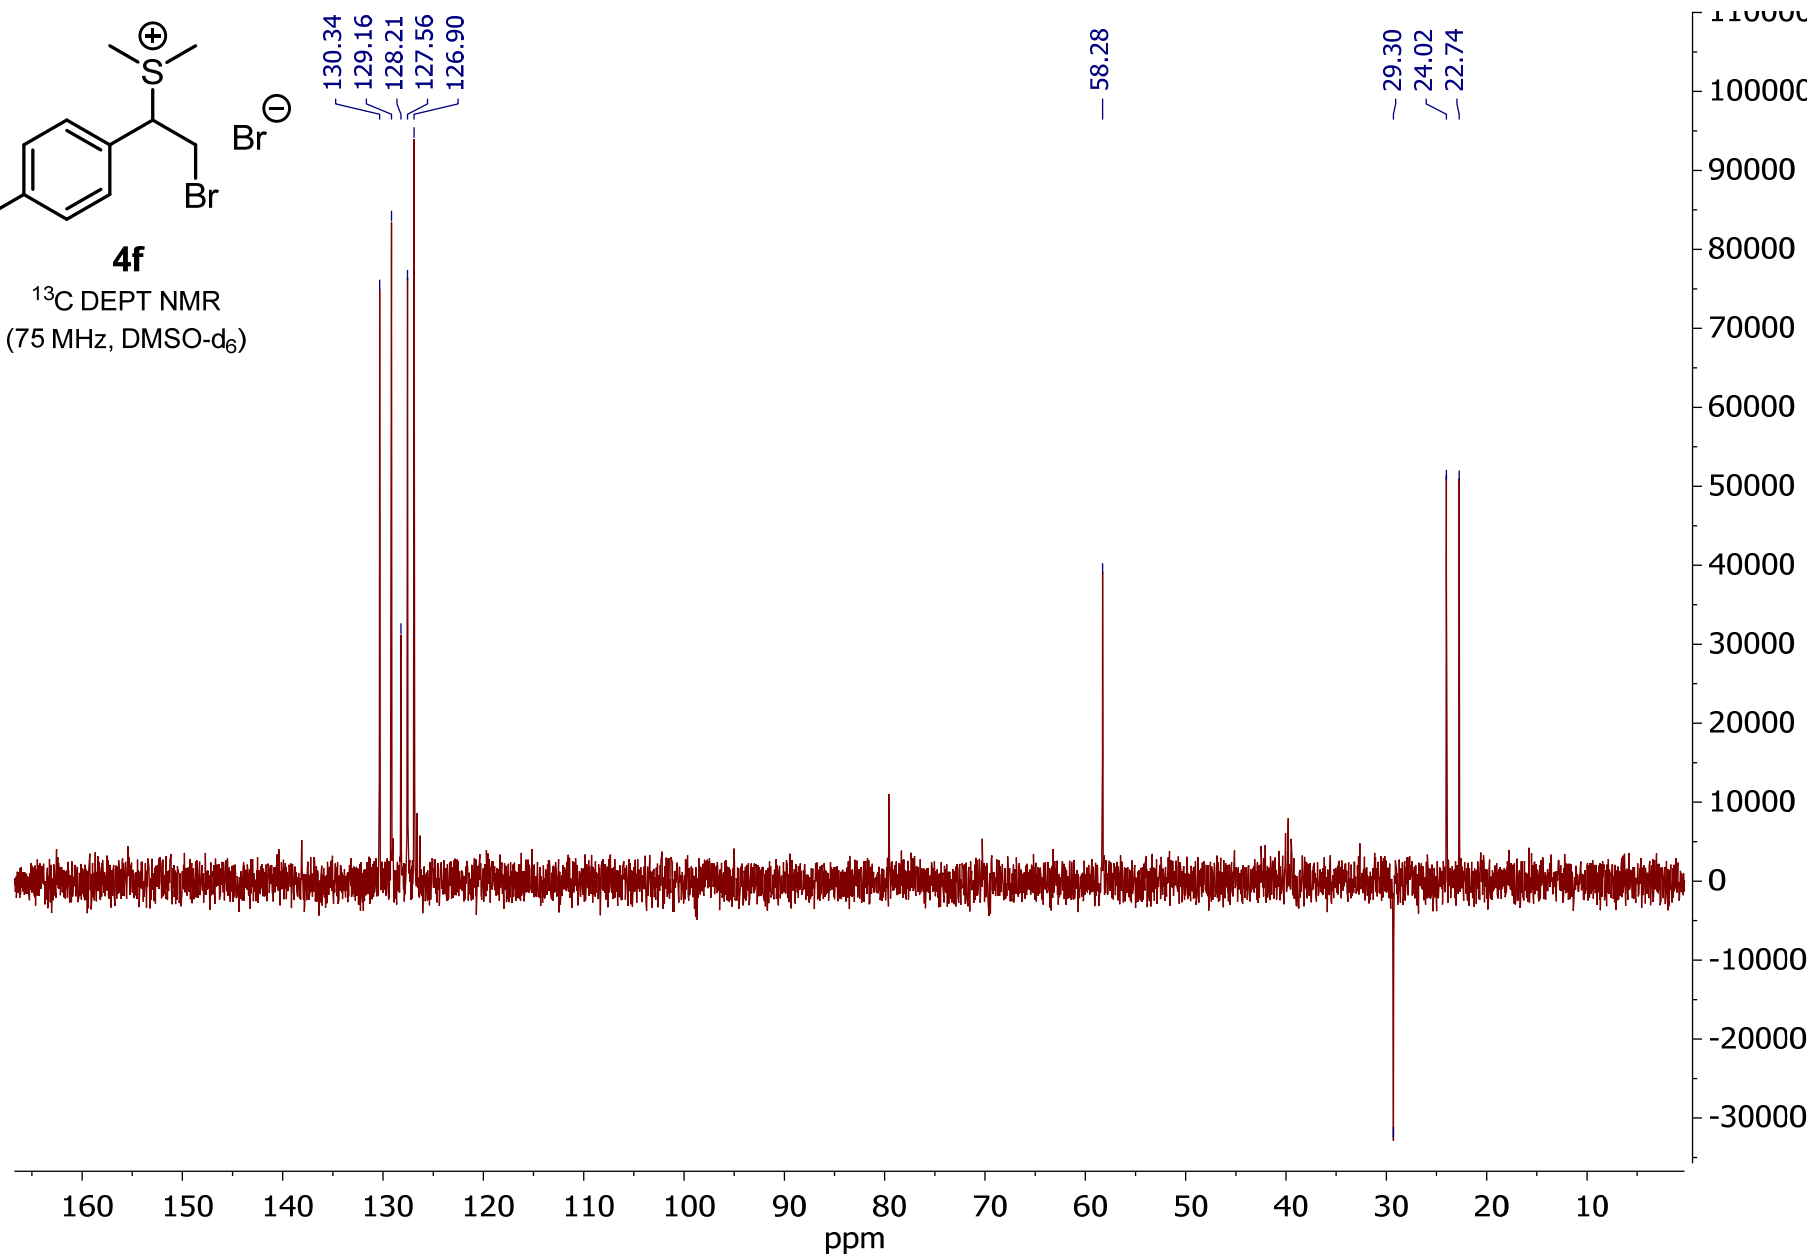

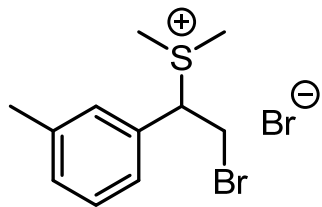

<sup>1</sup>H NMR (300 MHz, DMSO-d<sub>6</sub>)

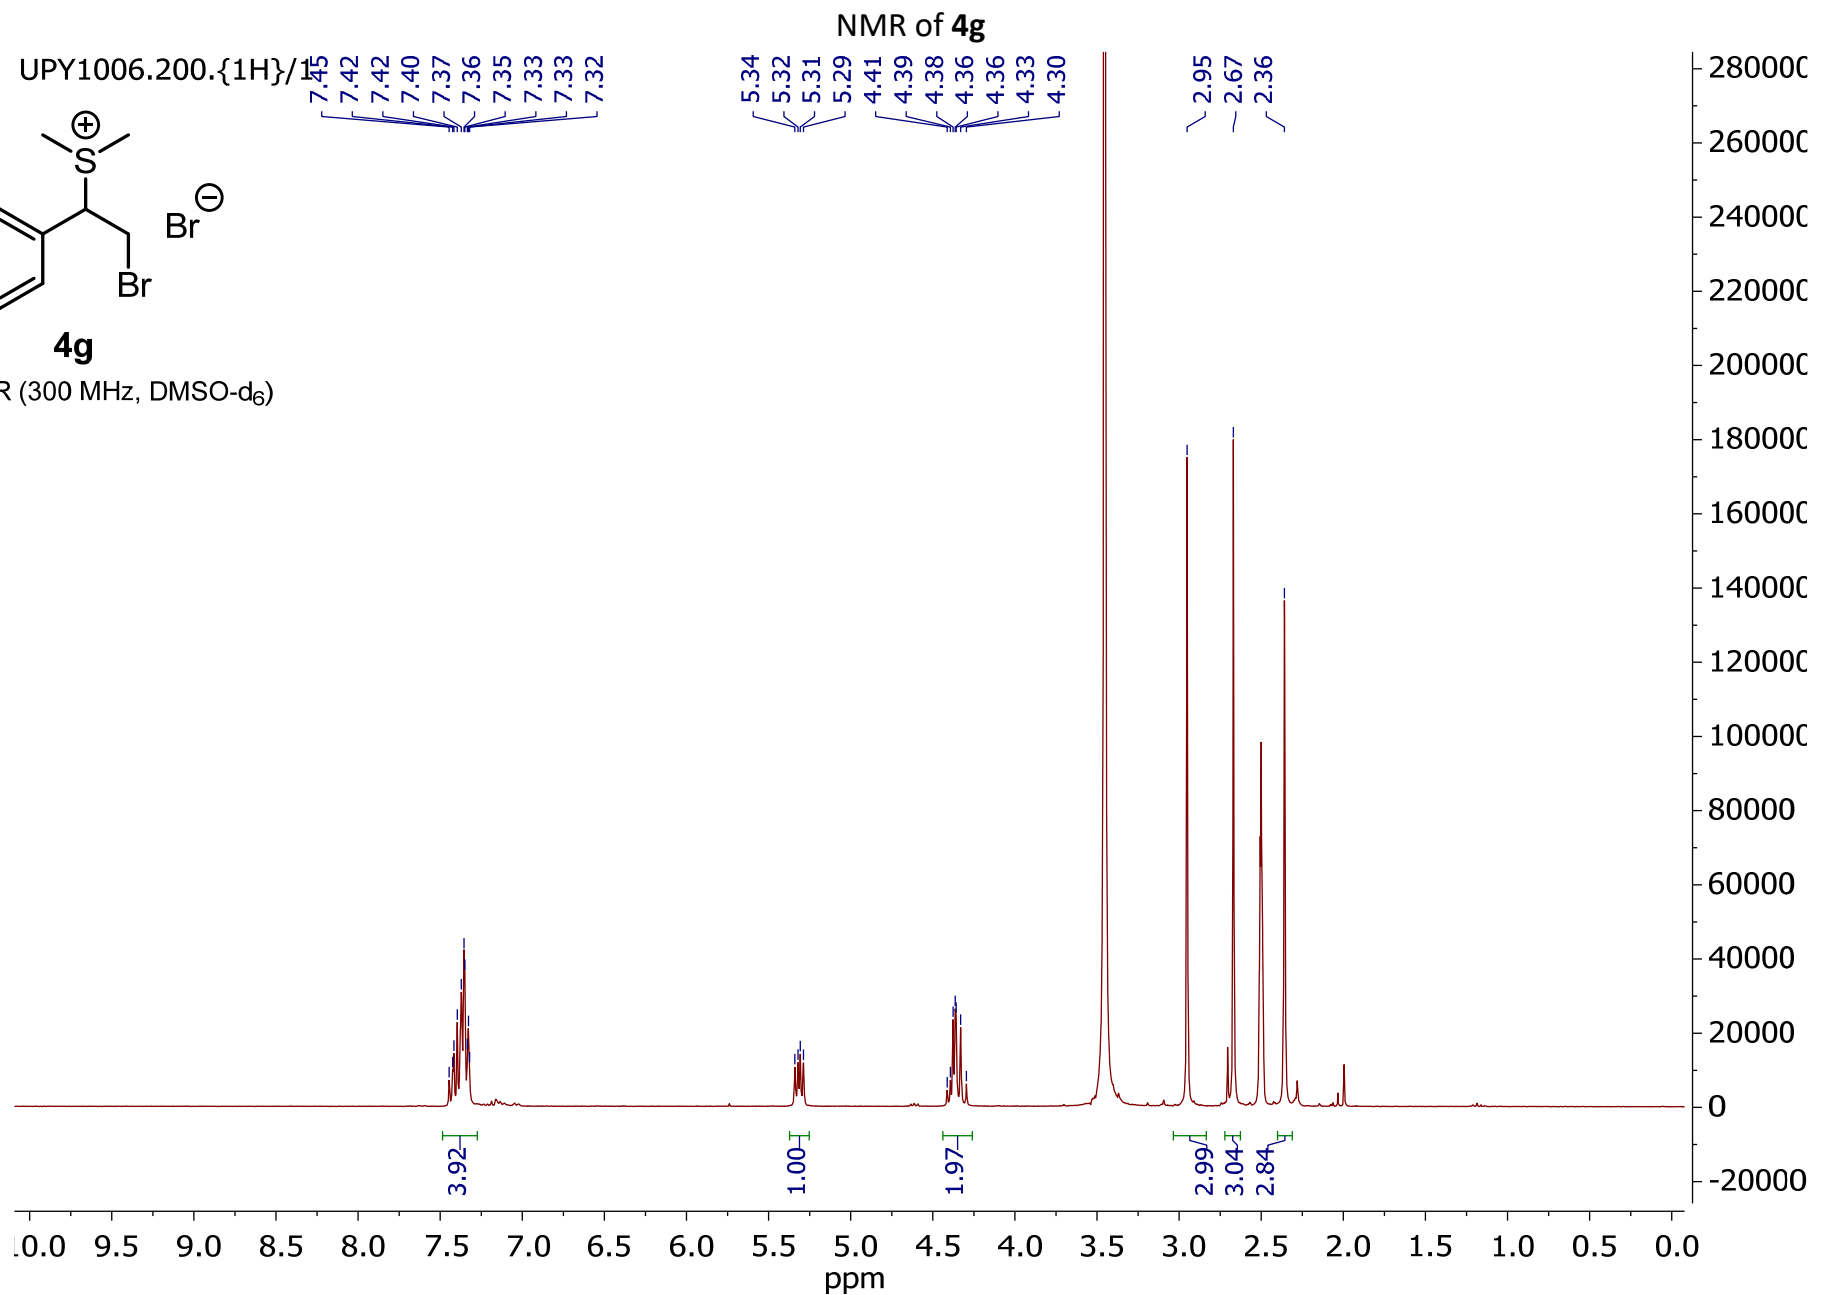

NMR of 4g

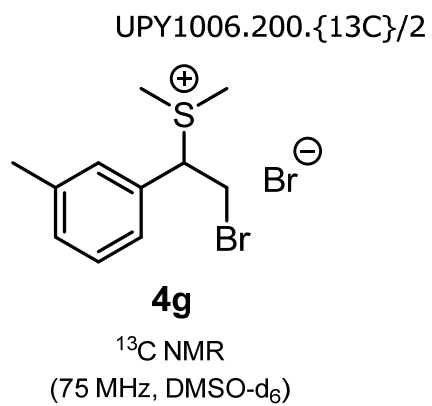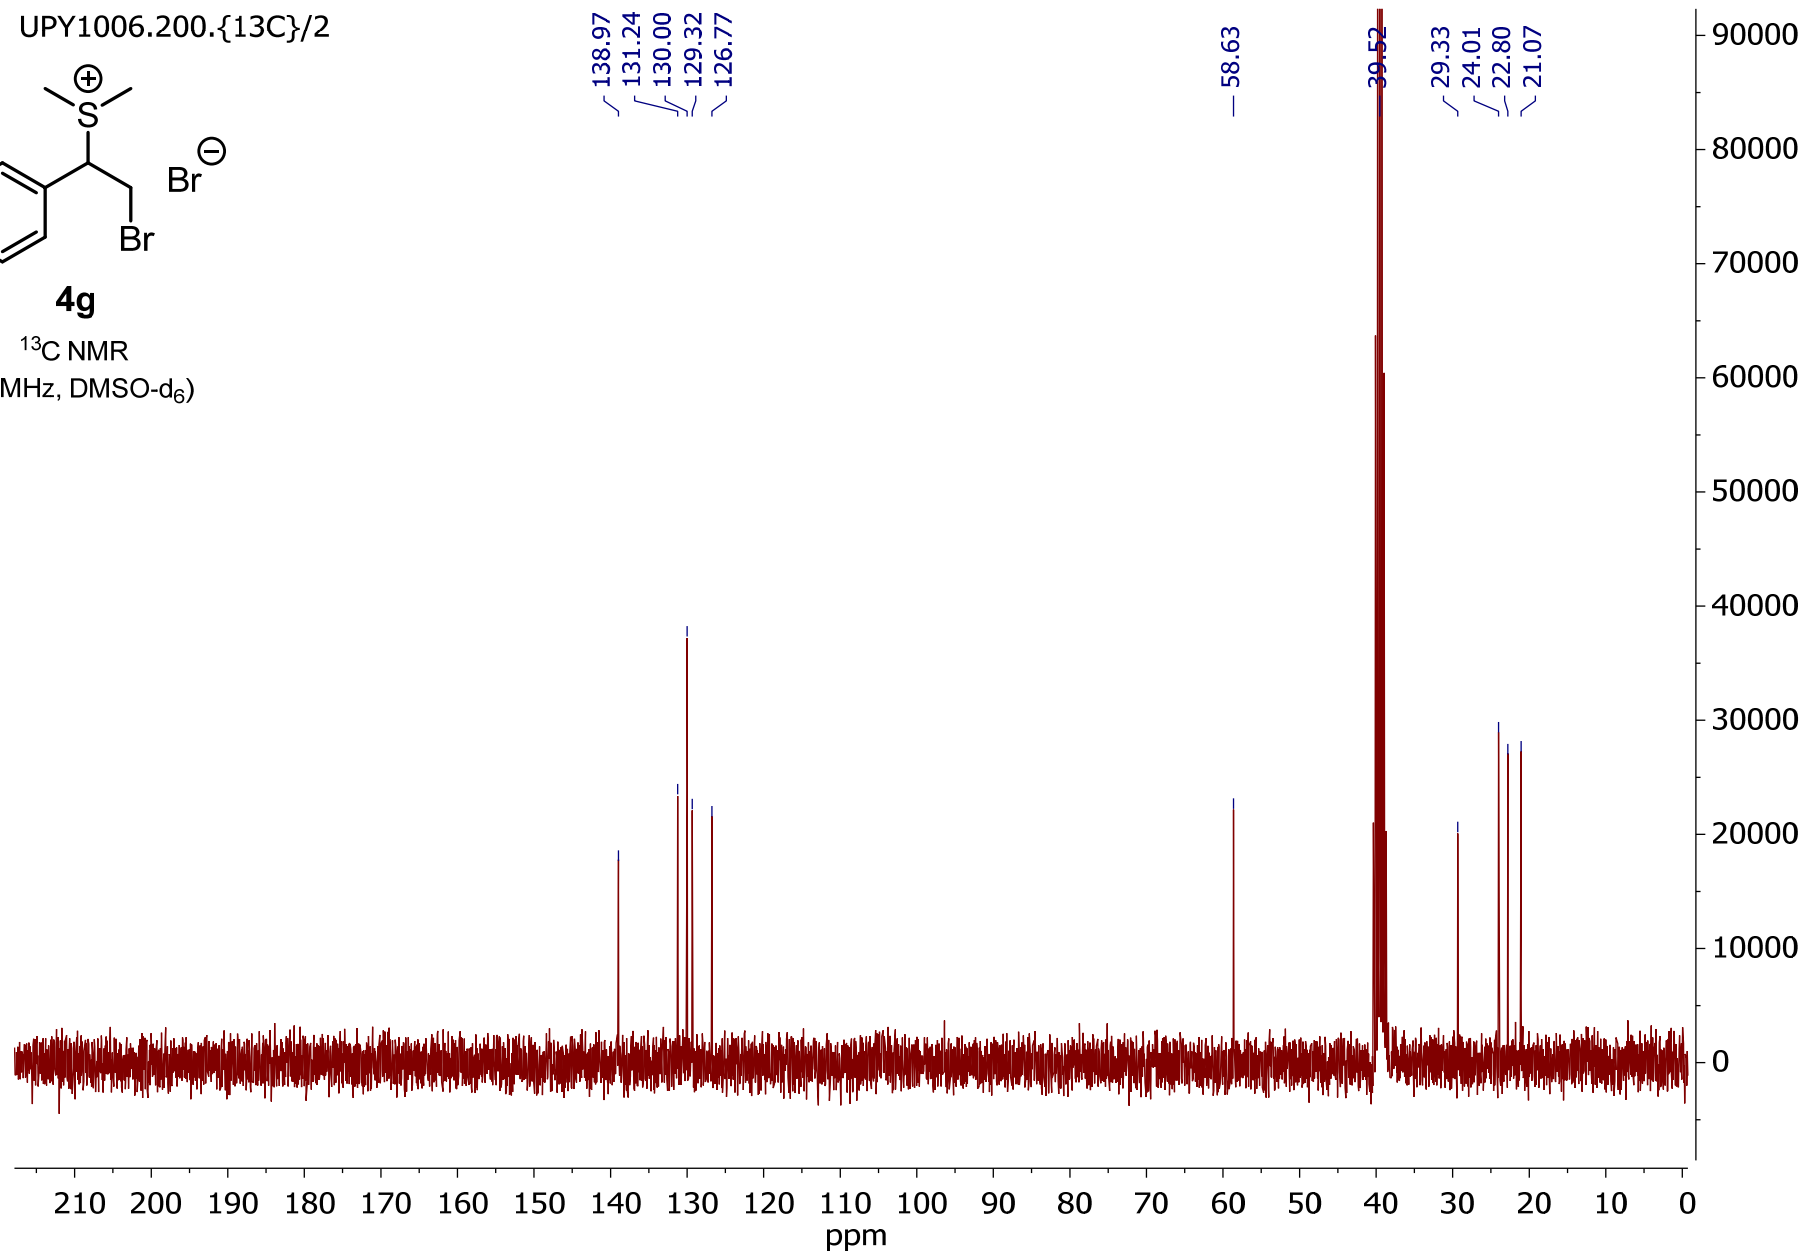

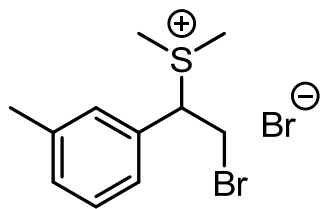

**4g**

<sup>13</sup>C DEPT NMR  
(75 MHz, DMSO-d<sub>6</sub>)

131.24  
129.99  
129.32  
126.77

NMR of 4g

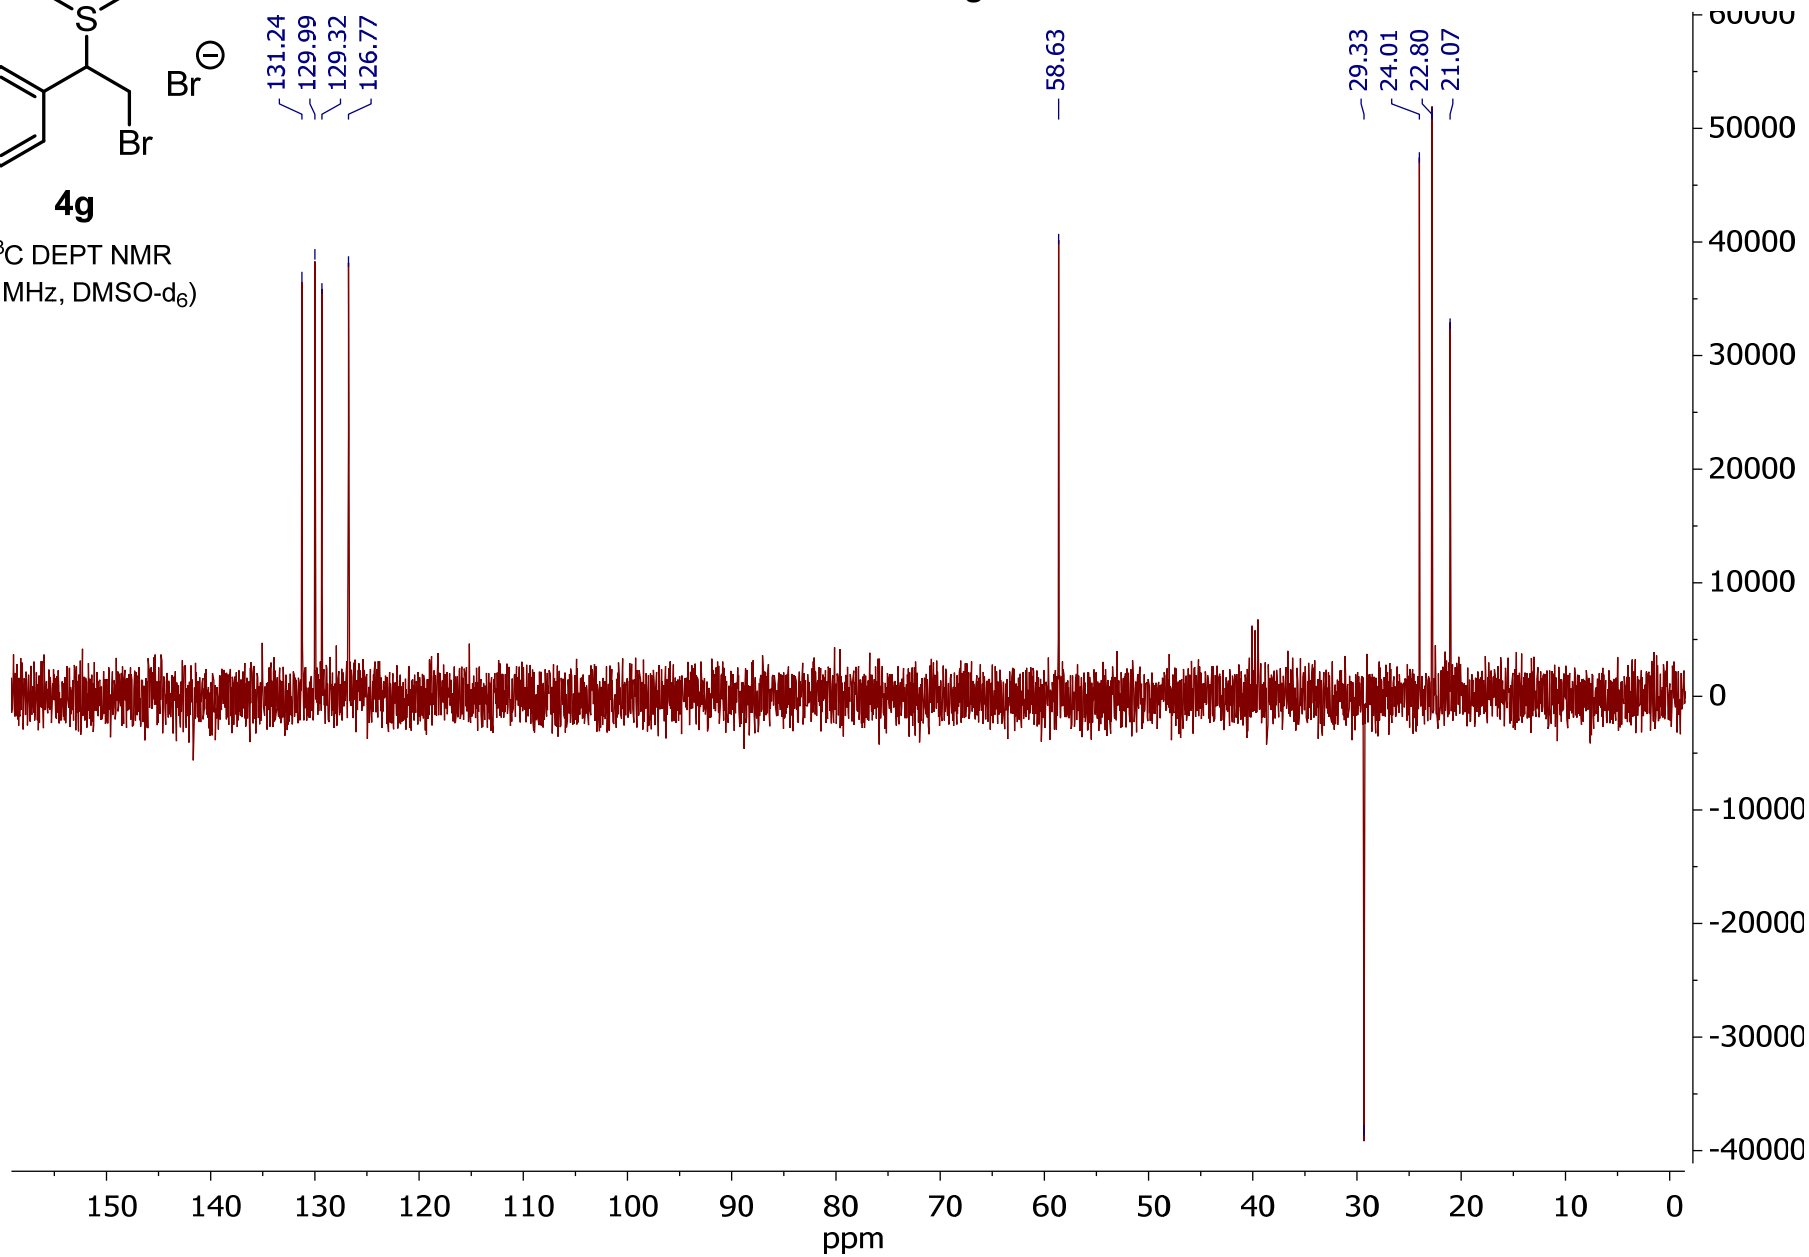

# FTIR (ATR) of 4g

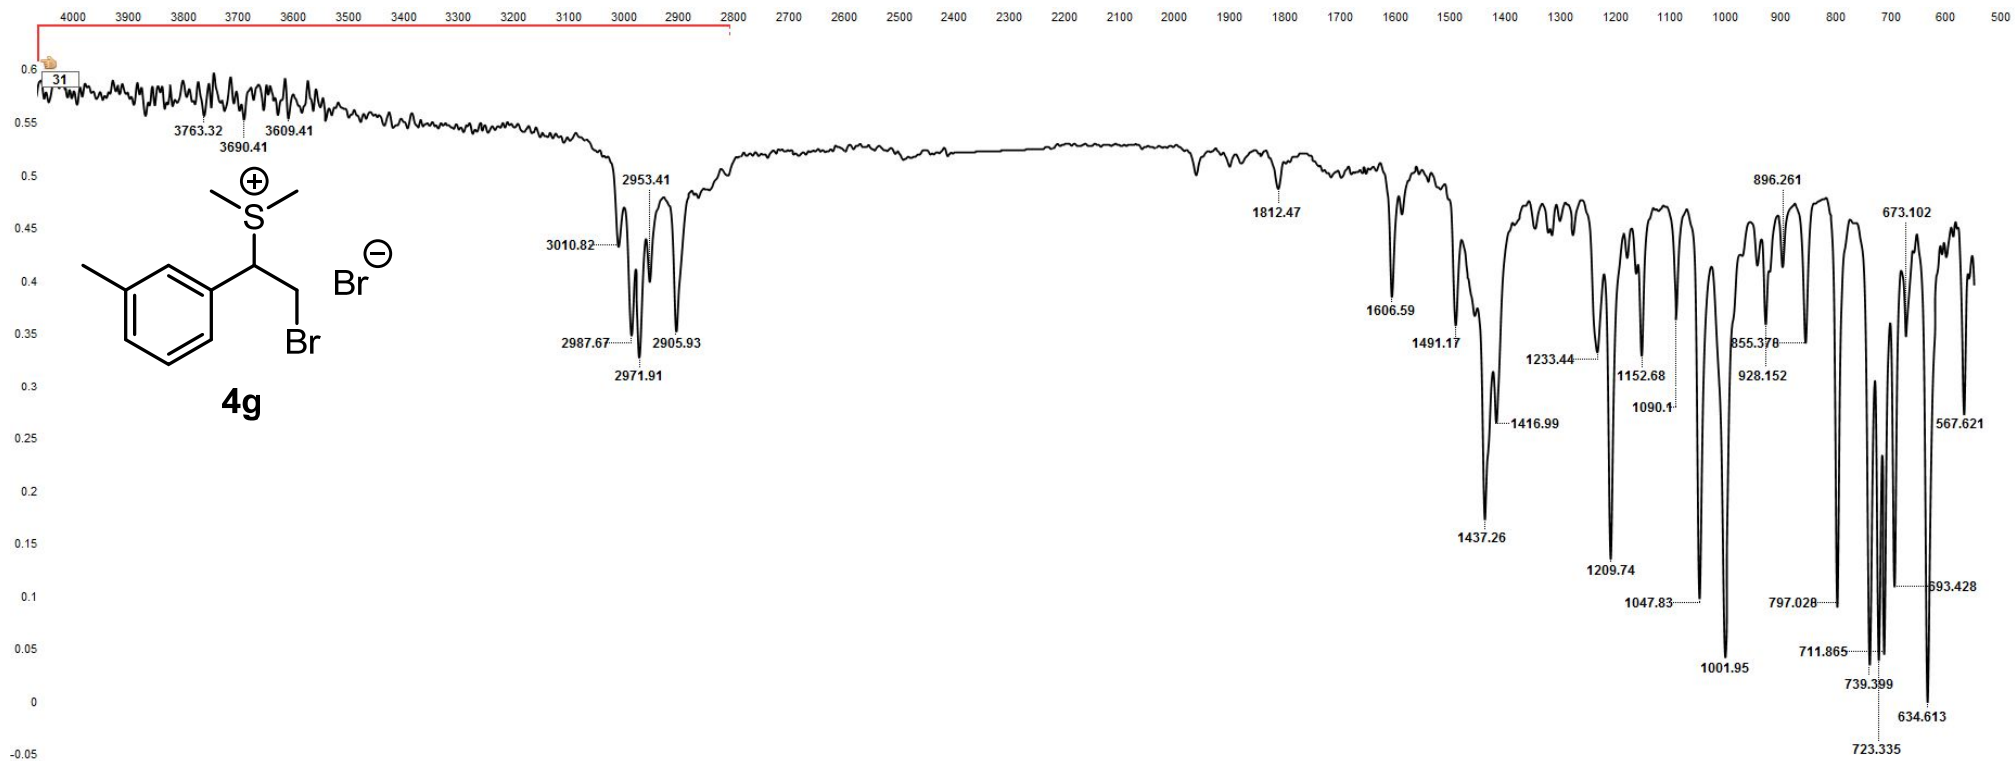

UPY960.100.{1H}/1

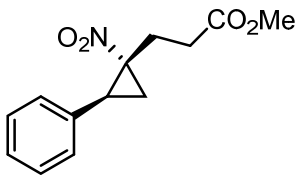

**1a**

$^1\text{H}$  NMR (300 MHz,  $\text{CDCl}_3$ )

### NMR of **1a**

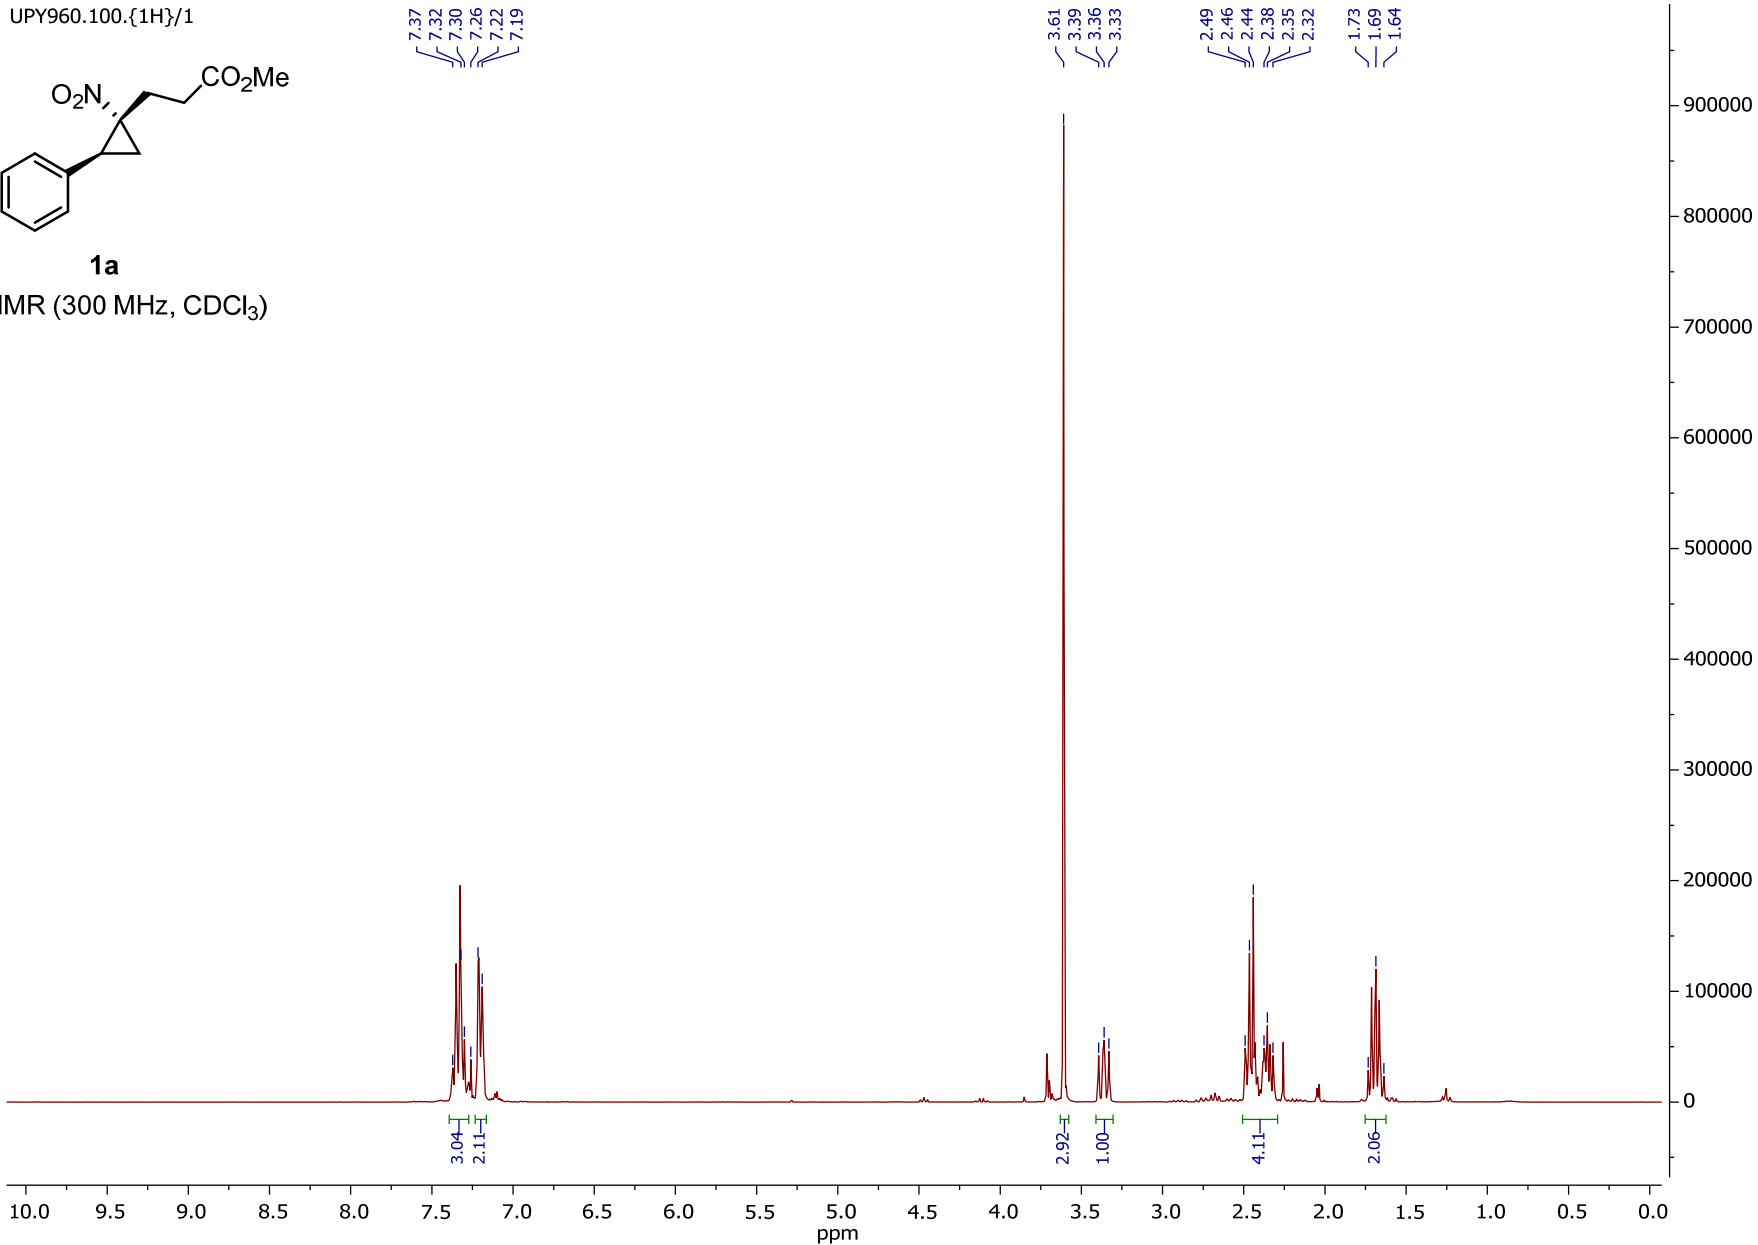

# NMR of 1a

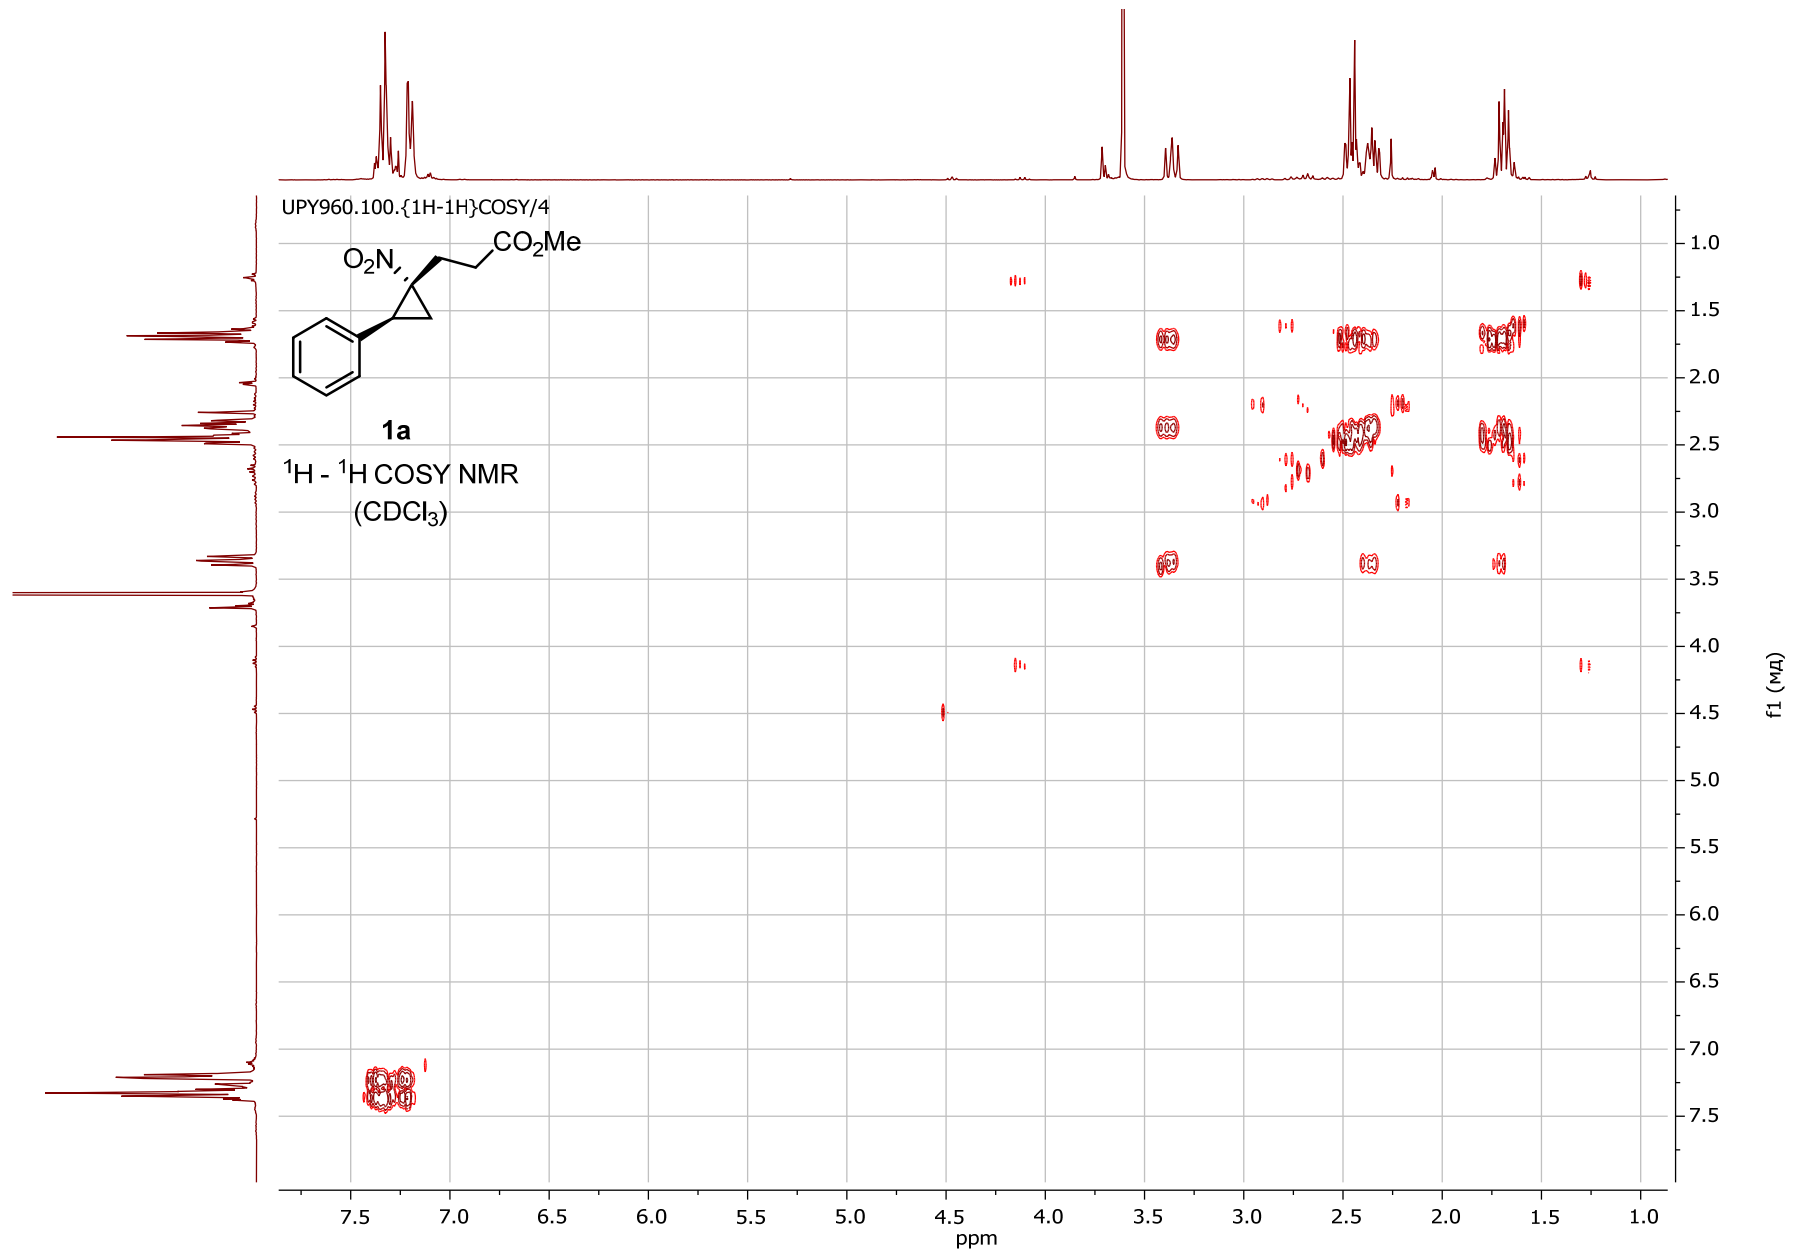

# NMR of 1a

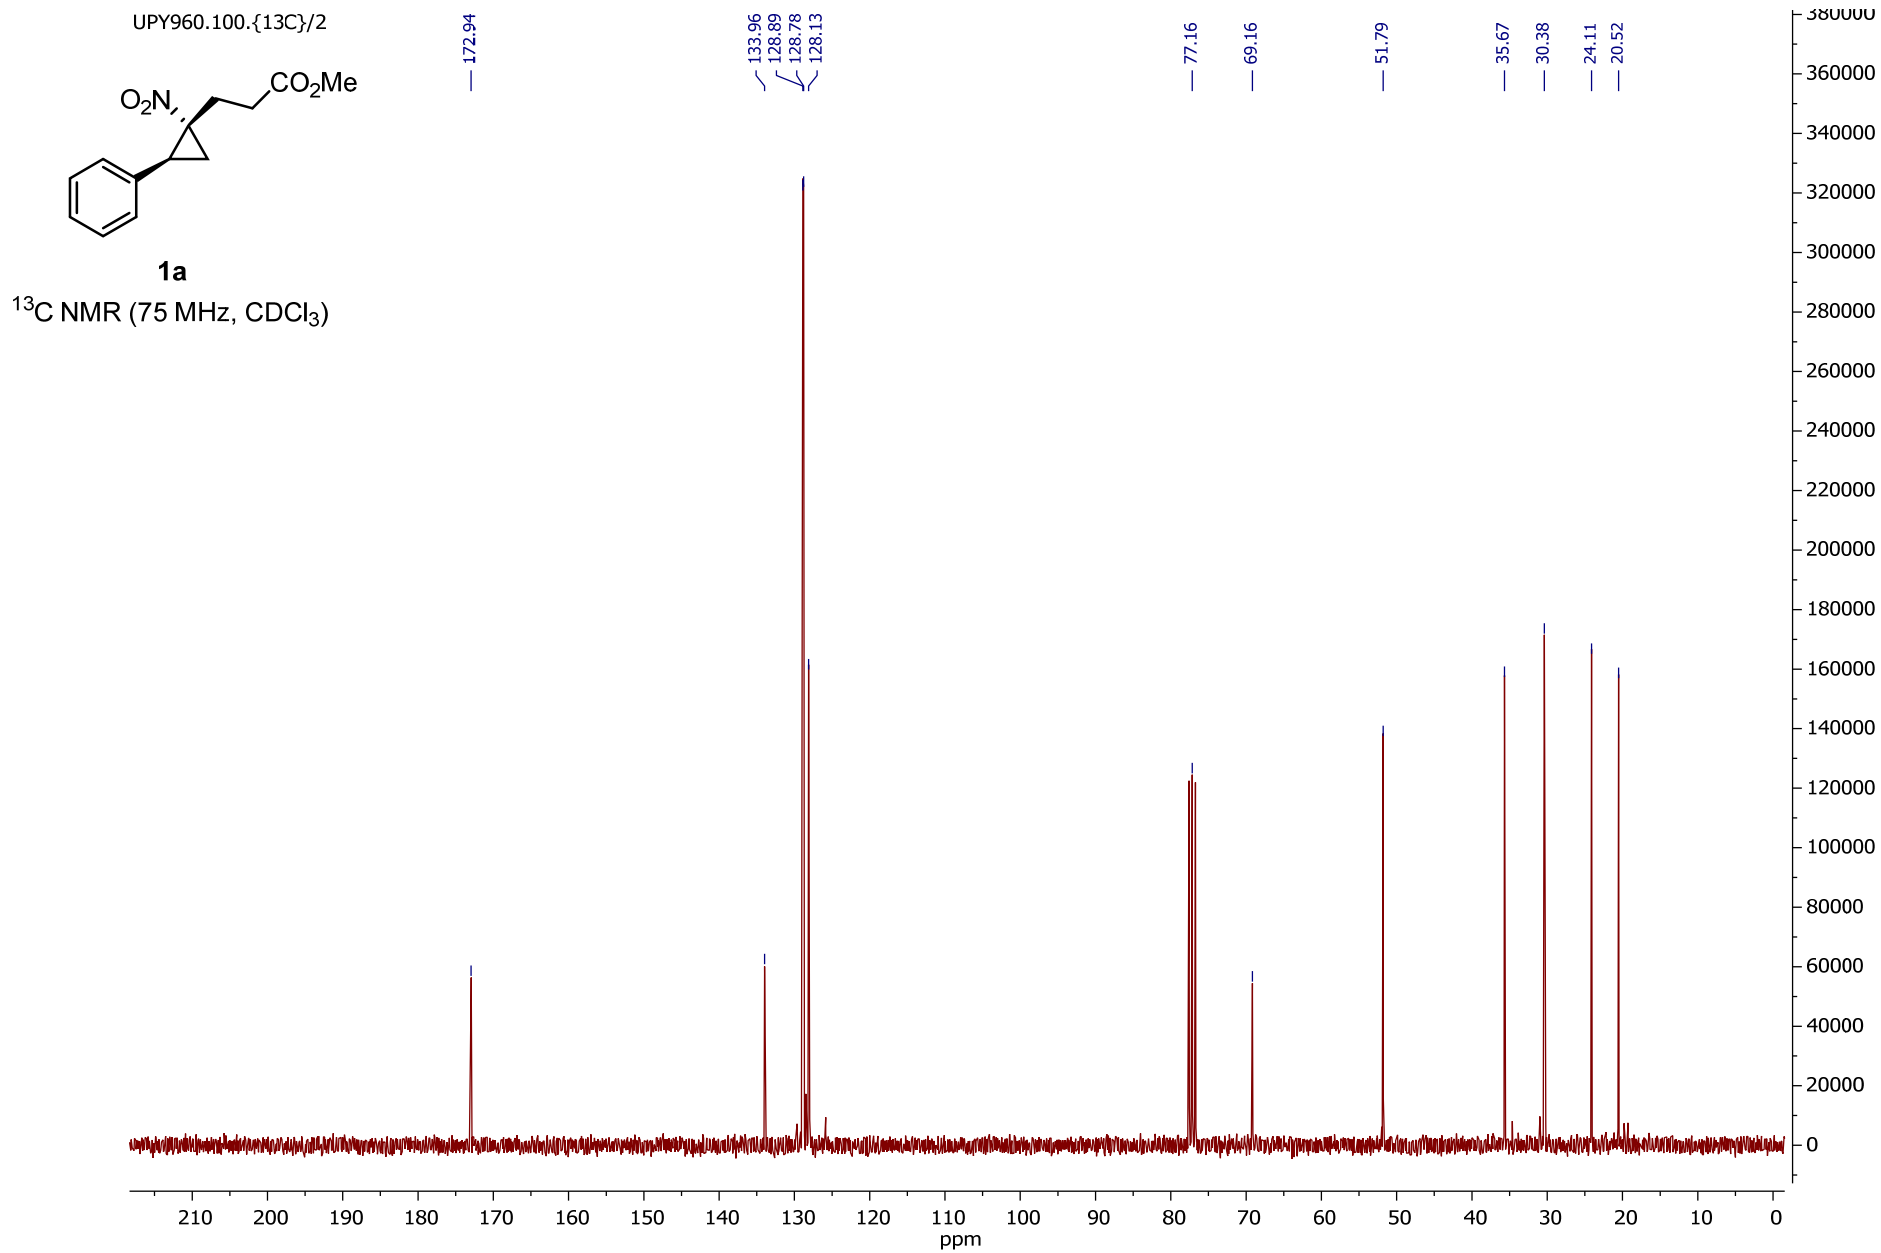



# NMR of **1a**

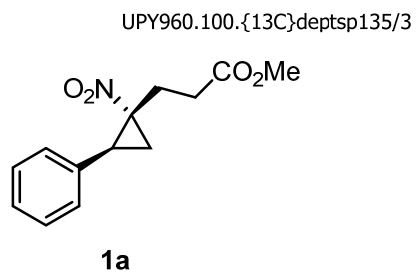

<sup>13</sup>C DEPT NMR  
(75 MHz, CDCl<sub>3</sub>)

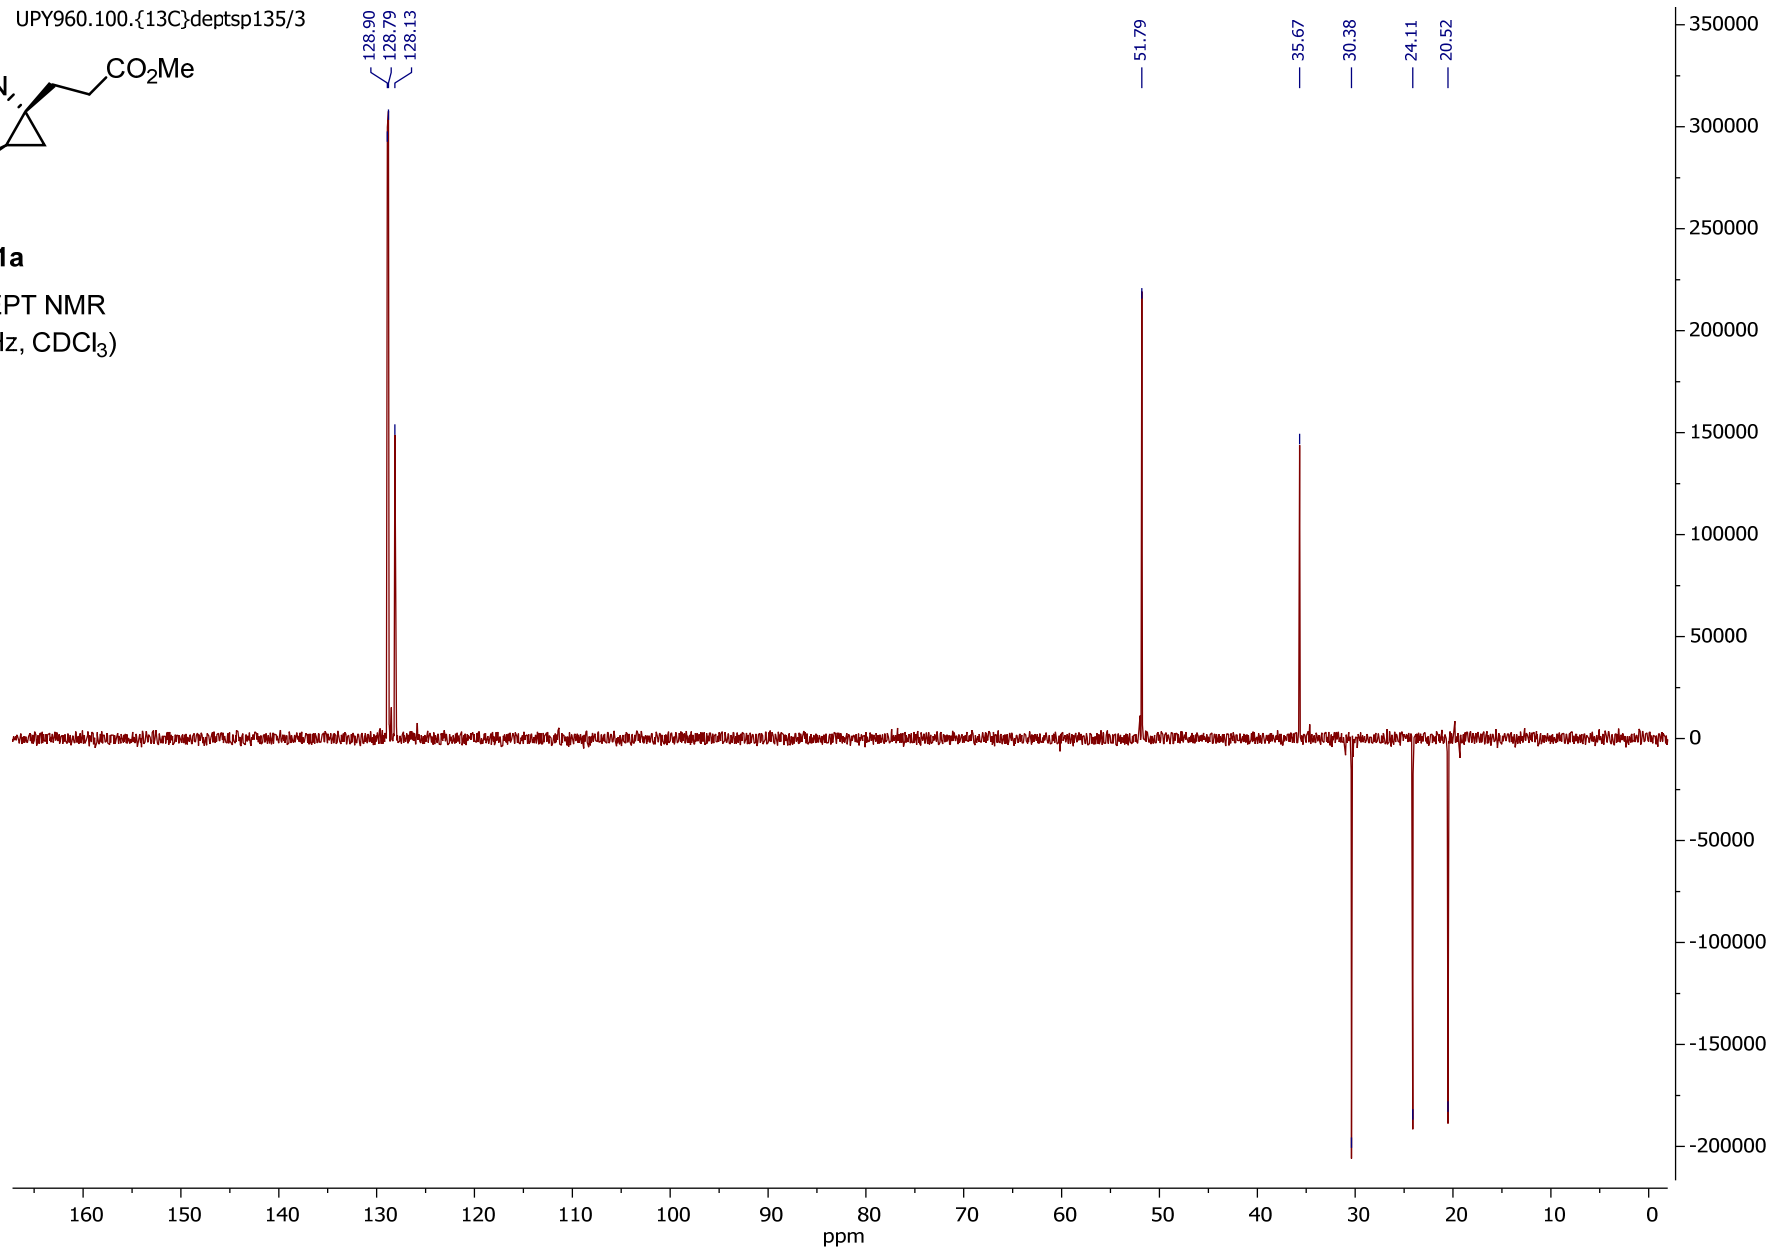

# NMR of **1b**

UPY968.100.{1H}/1

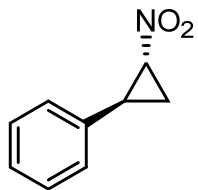

**1b**

<sup>1</sup>H NMR (300 MHz, CDCl<sub>3</sub>)

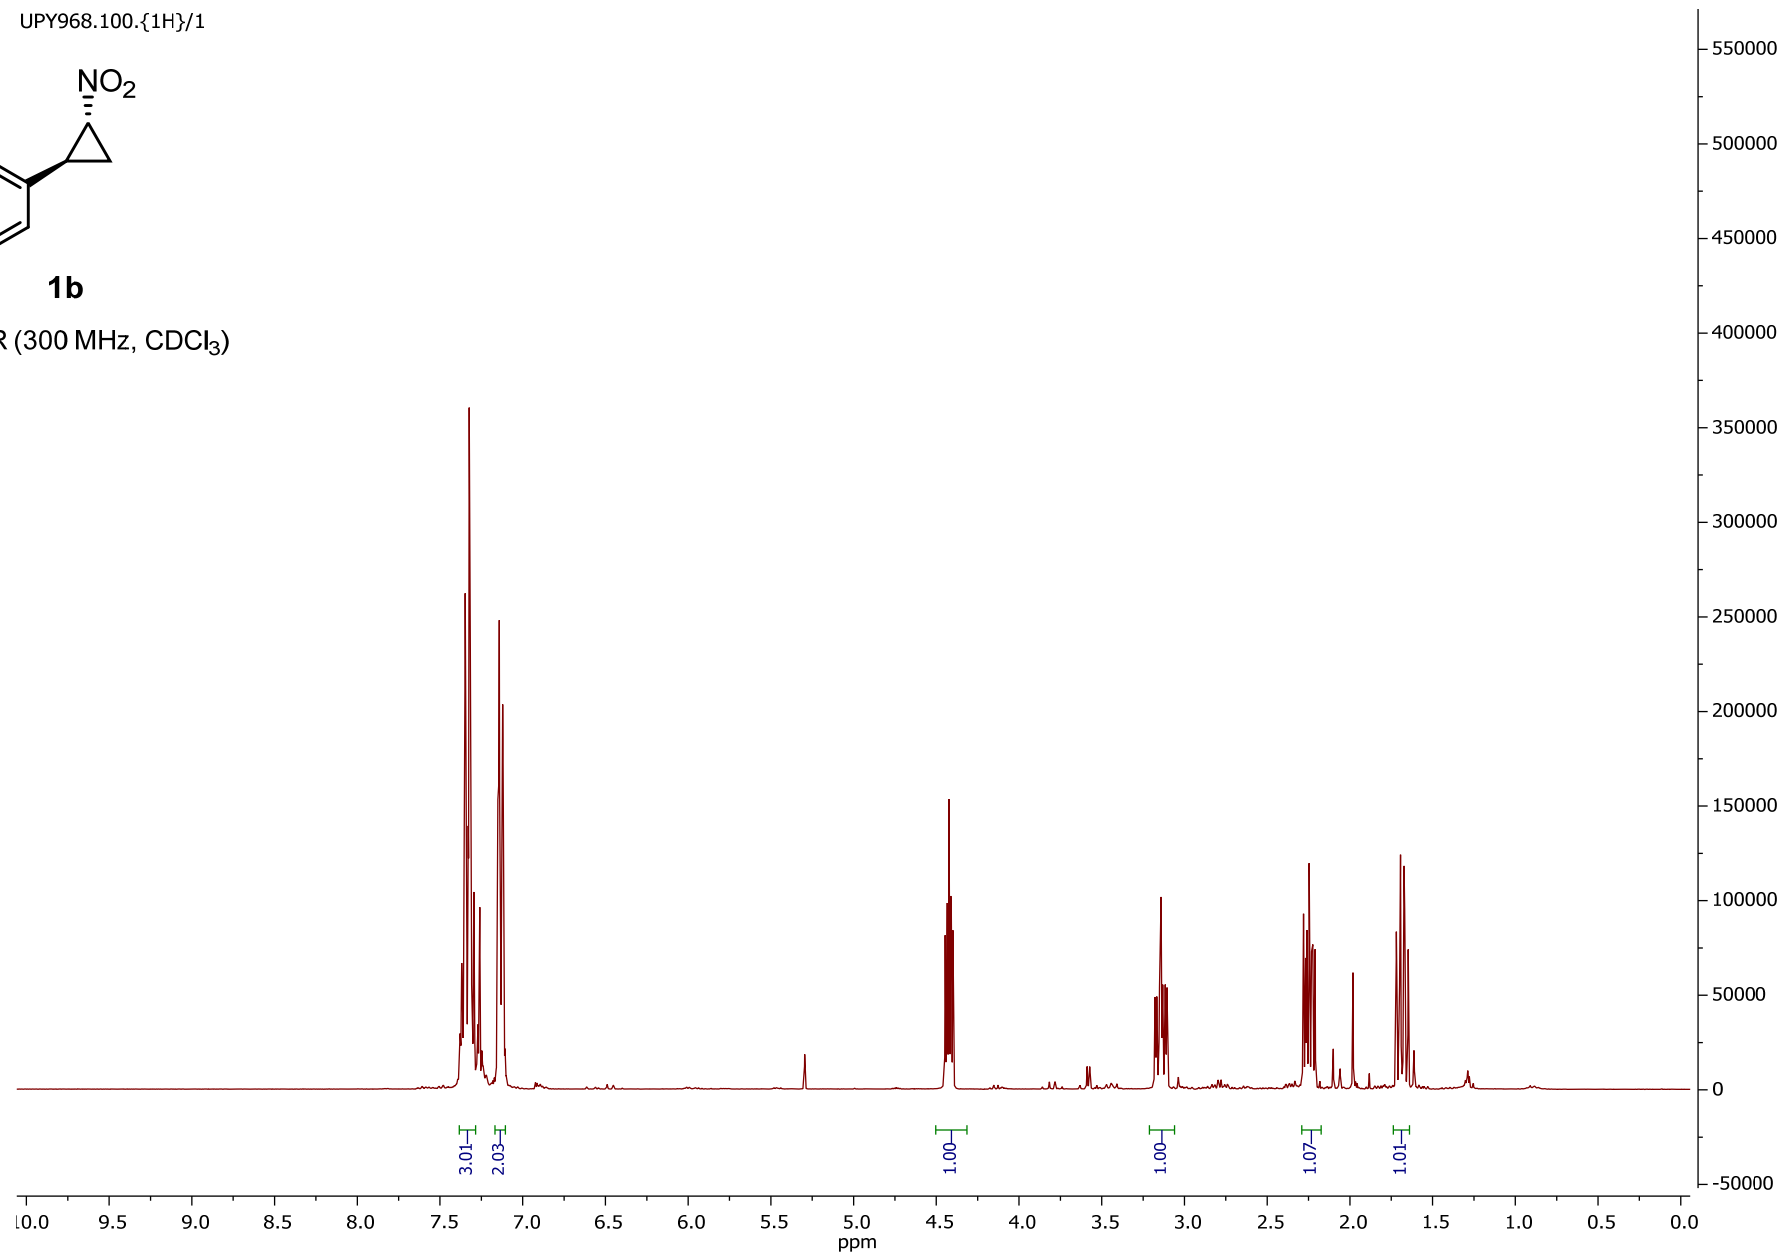

# NMR of 1c

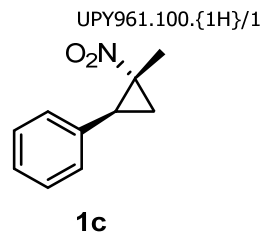

<sup>1</sup>H NMR (300 MHz, CDCl<sub>3</sub>)

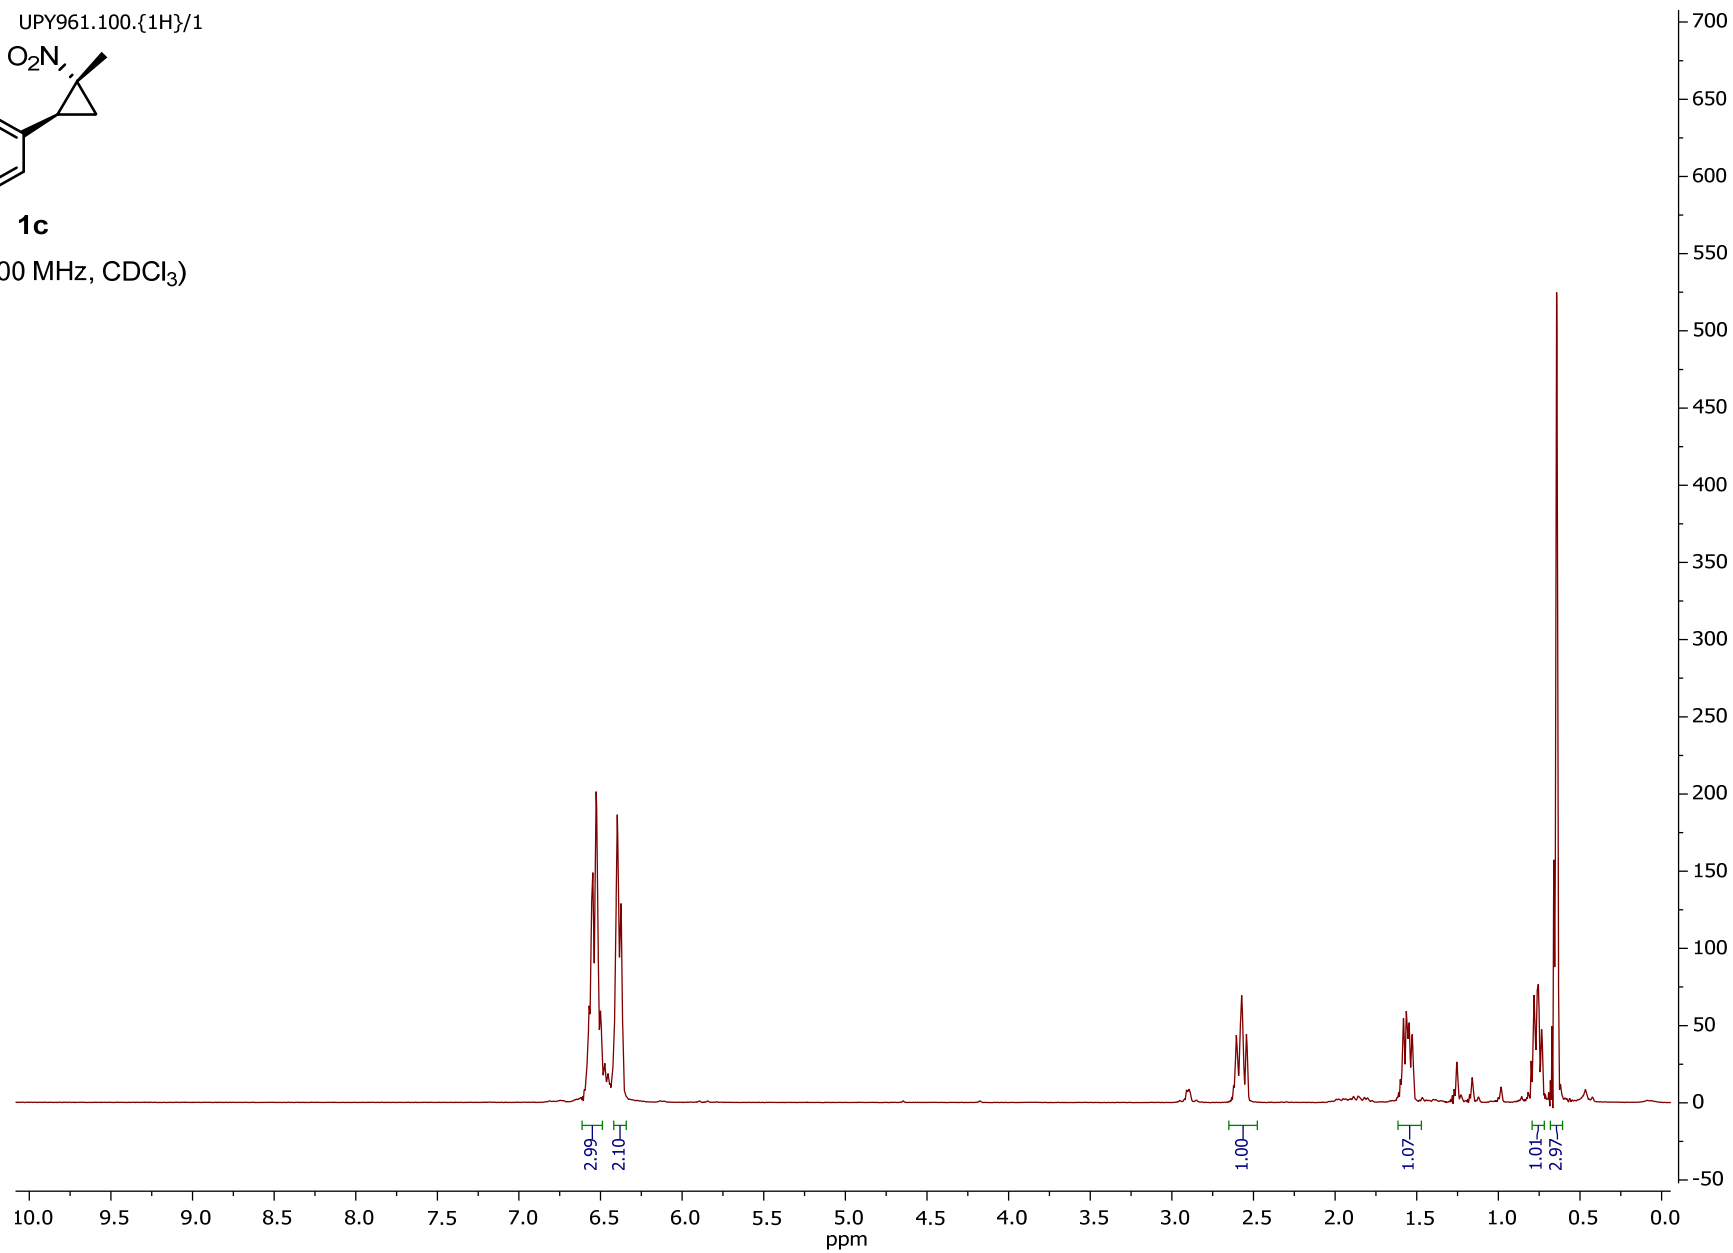

# NMR of 1c

UPY961.100.{13C}/2

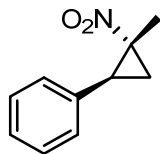

**1c**

<sup>13</sup>C NMR (75 MHz, CDCl<sub>3</sub>)

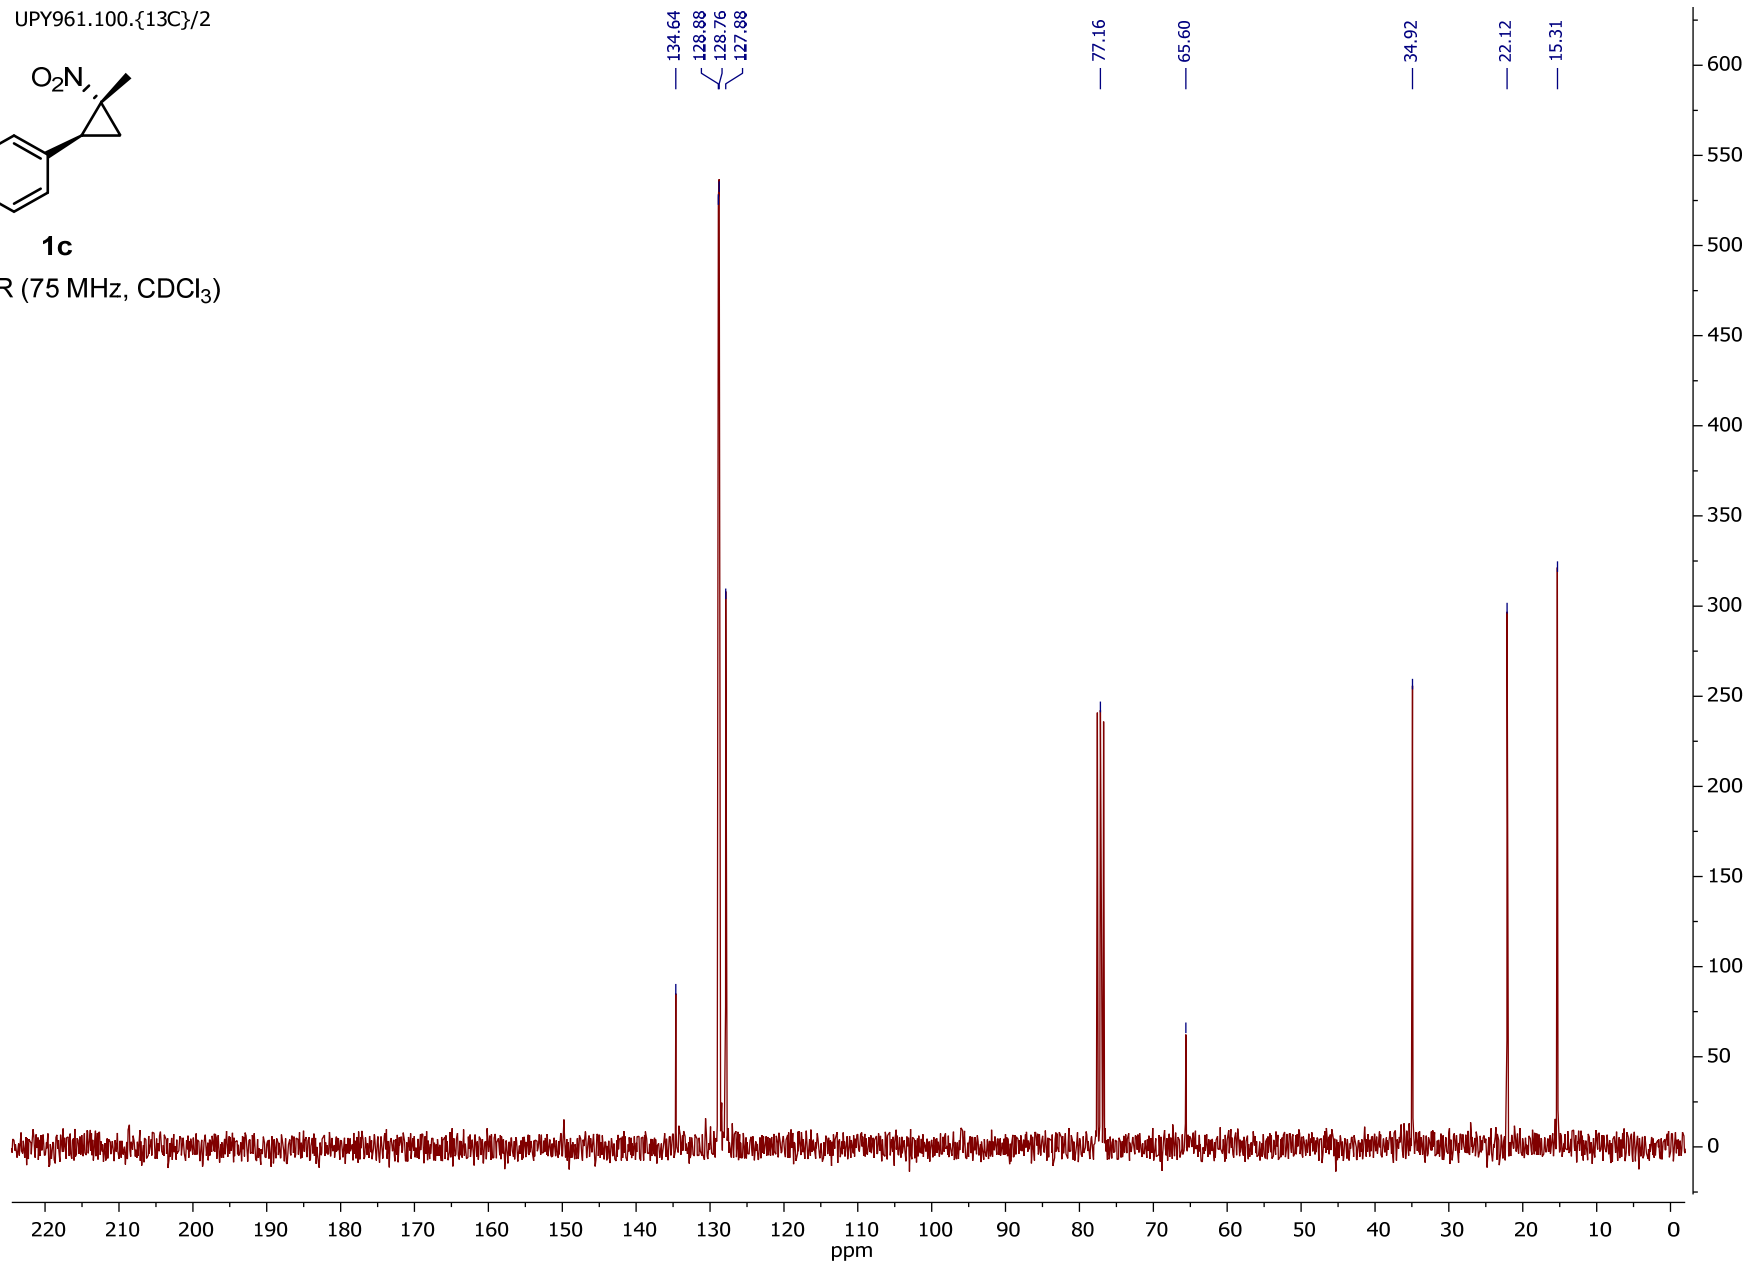

# NMR of 1c

UPY961.100.{13C}deftsp135/3

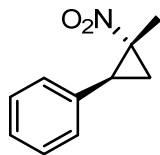

**1c**

<sup>13</sup>C DEPT NMR  
(75 MHz, CDCl<sub>3</sub>)

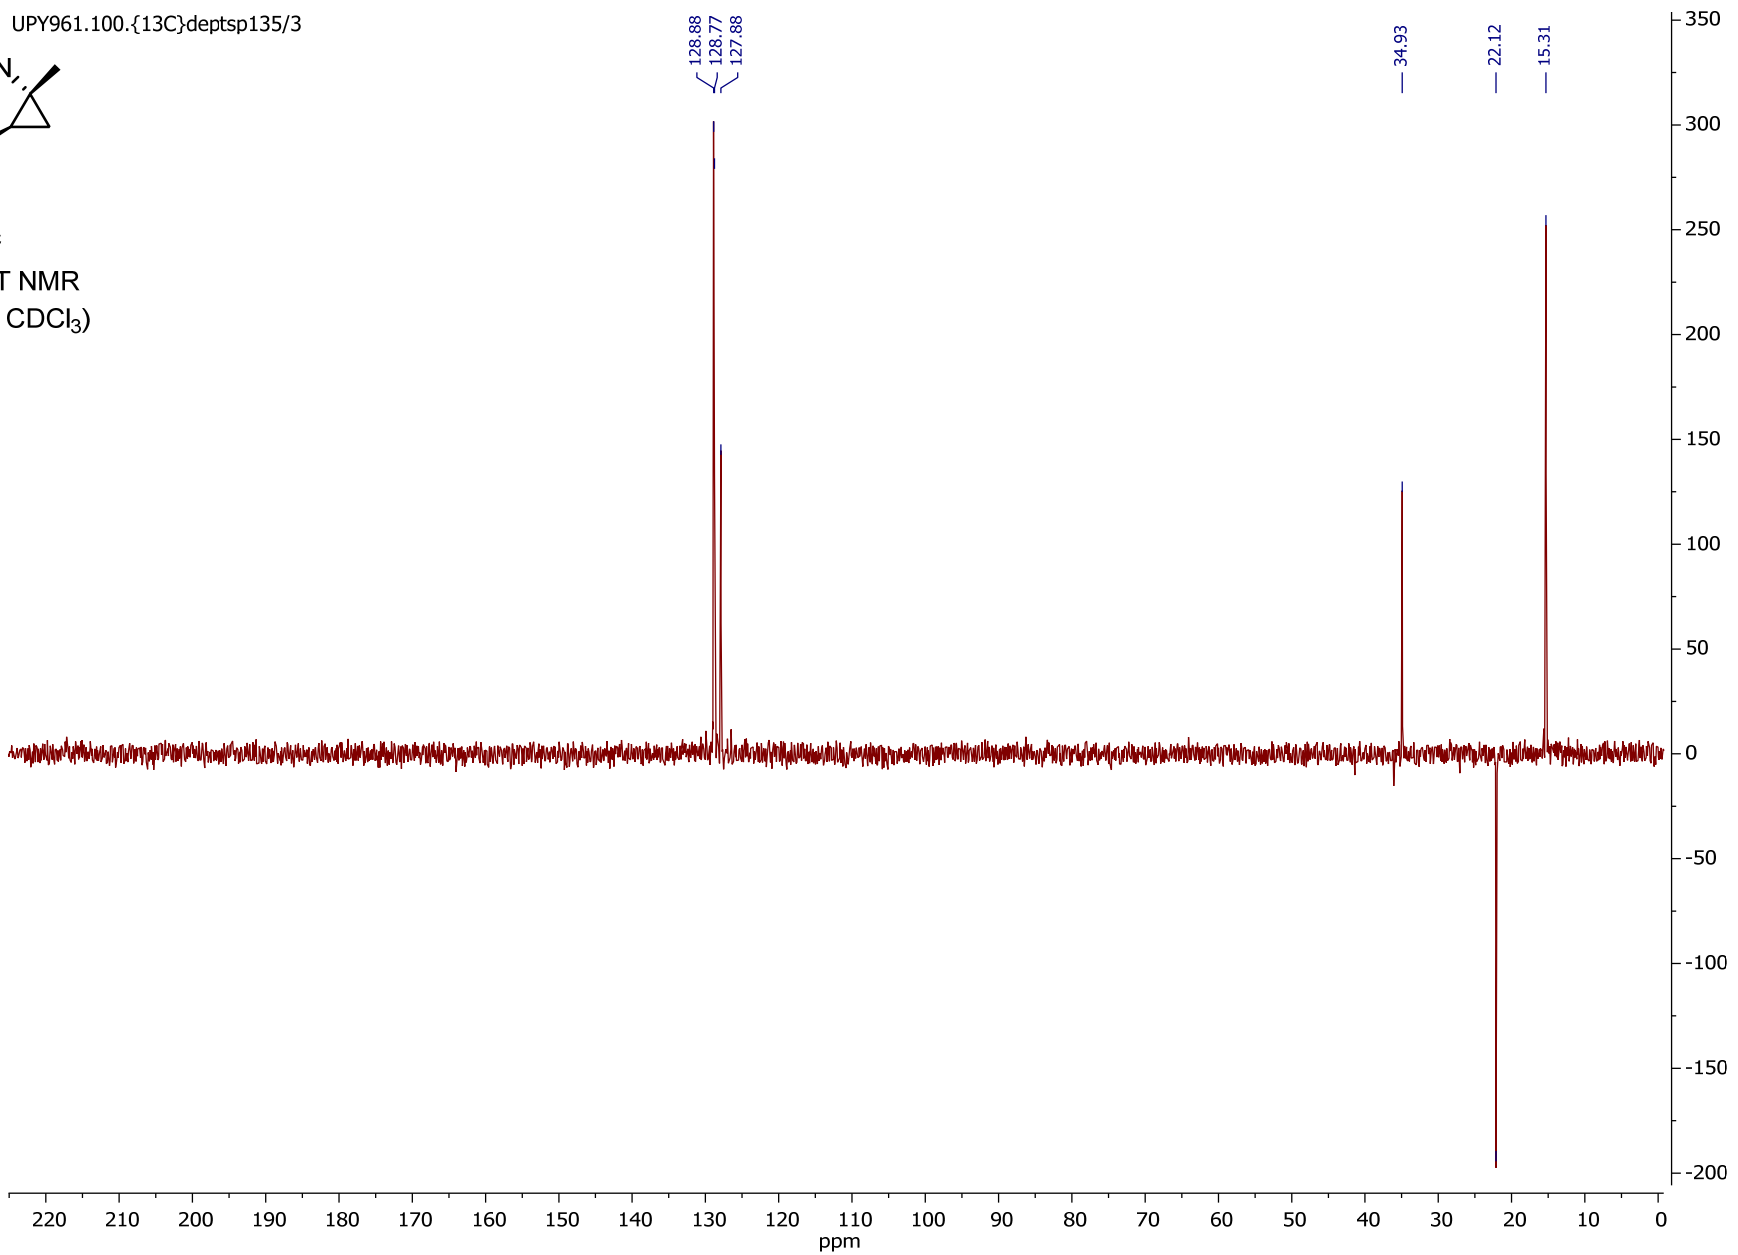

# NMR of 1d

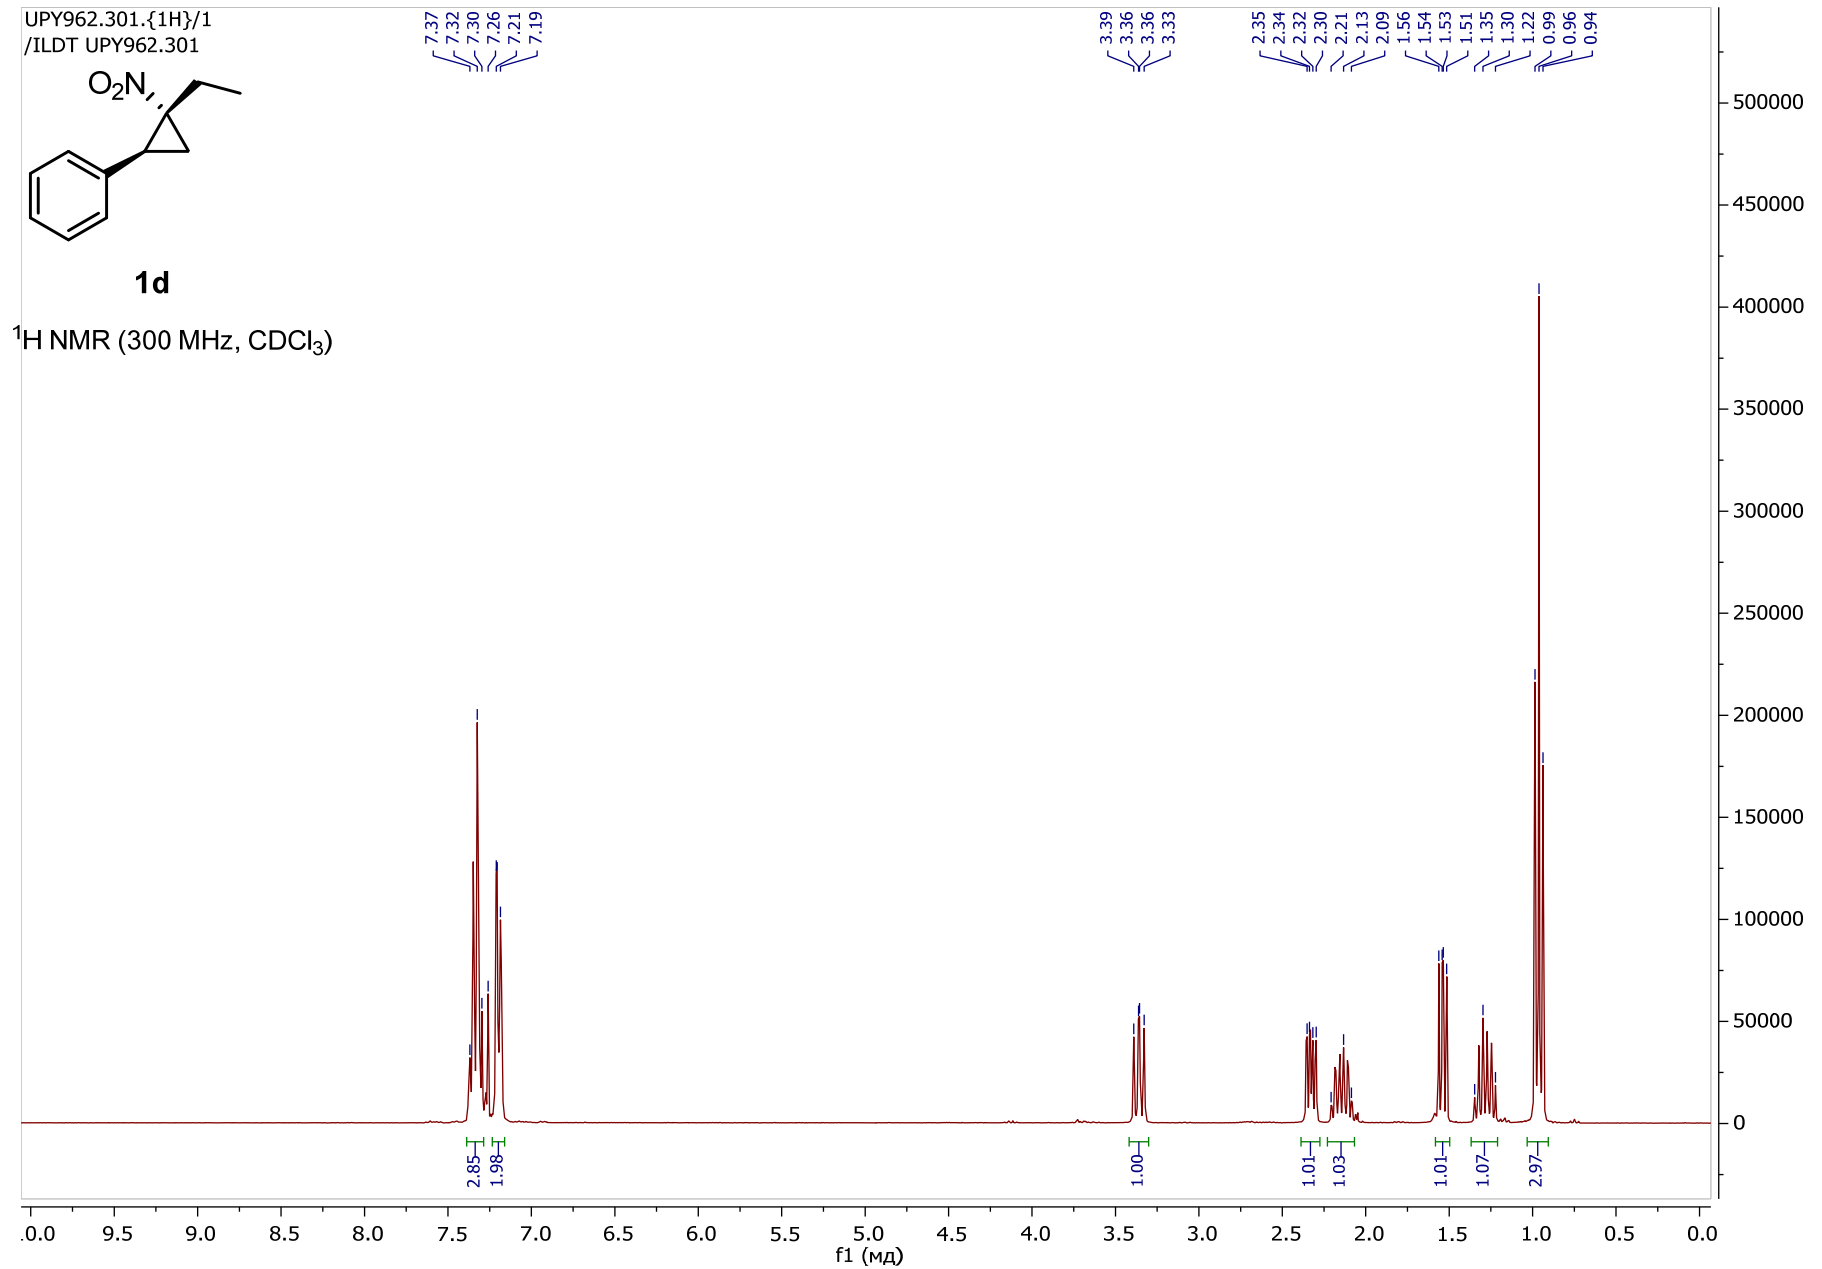

NMR of **1d**

UPY962.301.{13C}/2

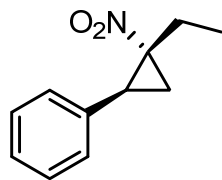

**1d**

<sup>13</sup>C NMR (75 MHz, CDCl<sub>3</sub>)

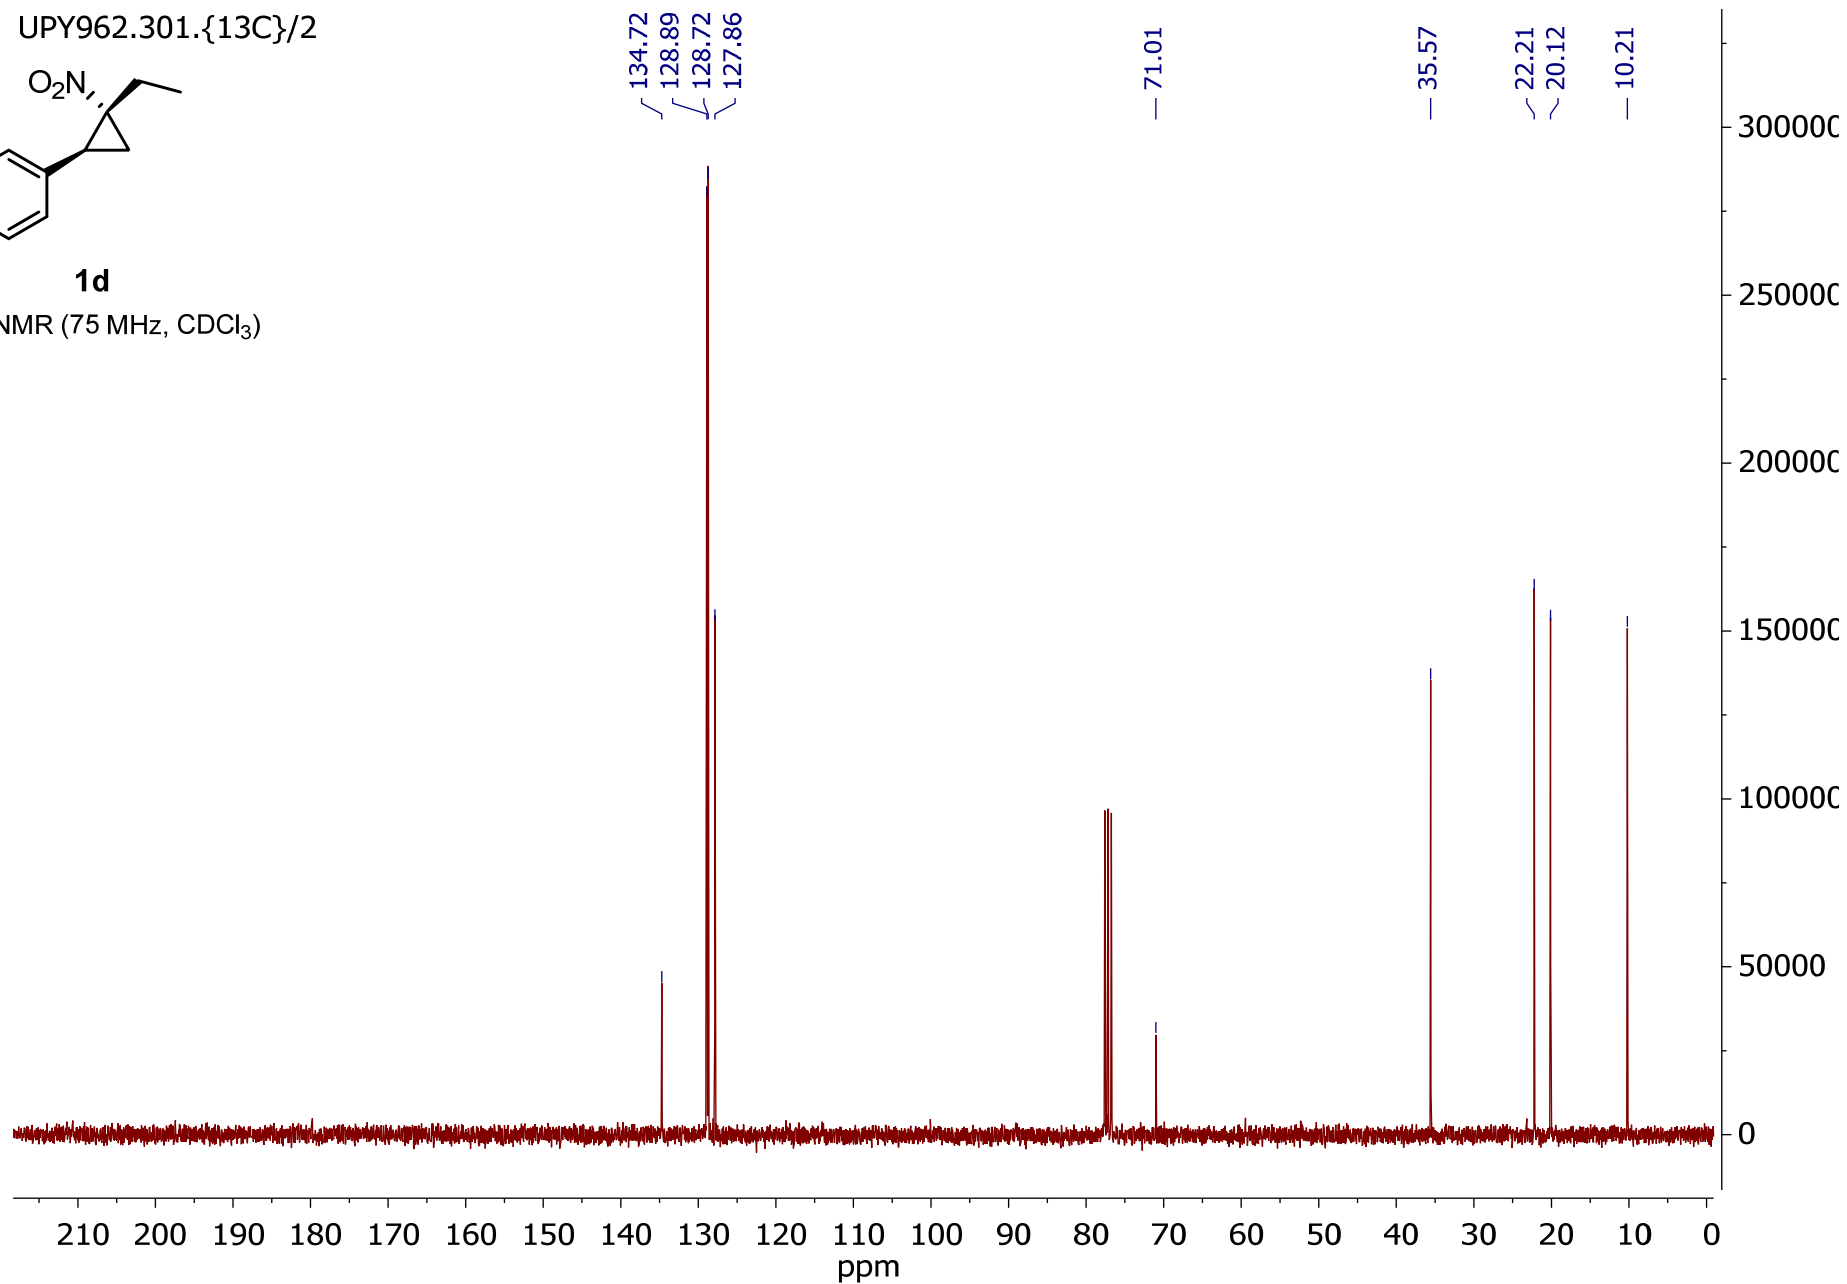

# NMR of **1d**

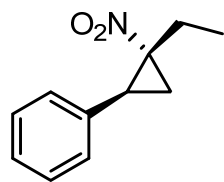

**1d**

$^{13}\text{C}$  DEPT NMR  
(75 MHz,  $\text{CDCl}_3$ )

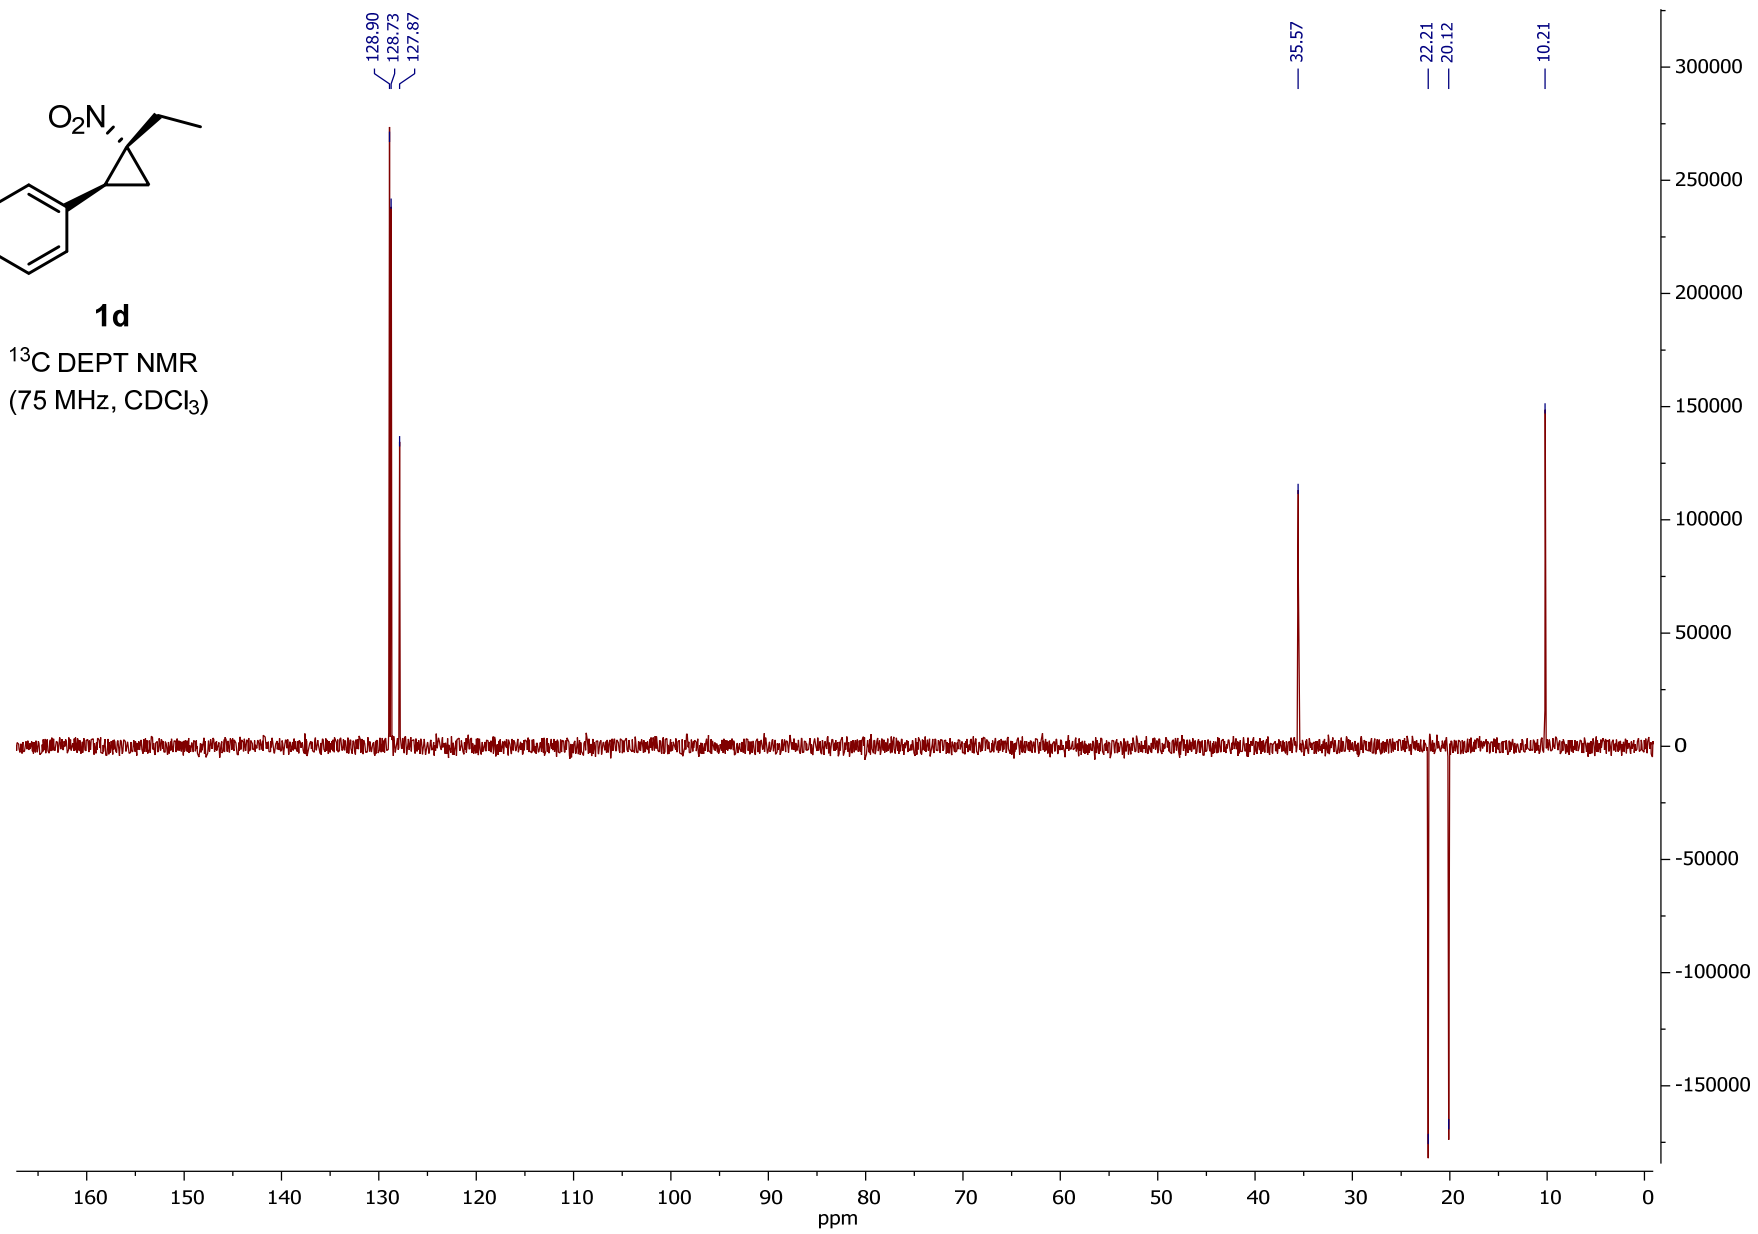



NMR of **1d**

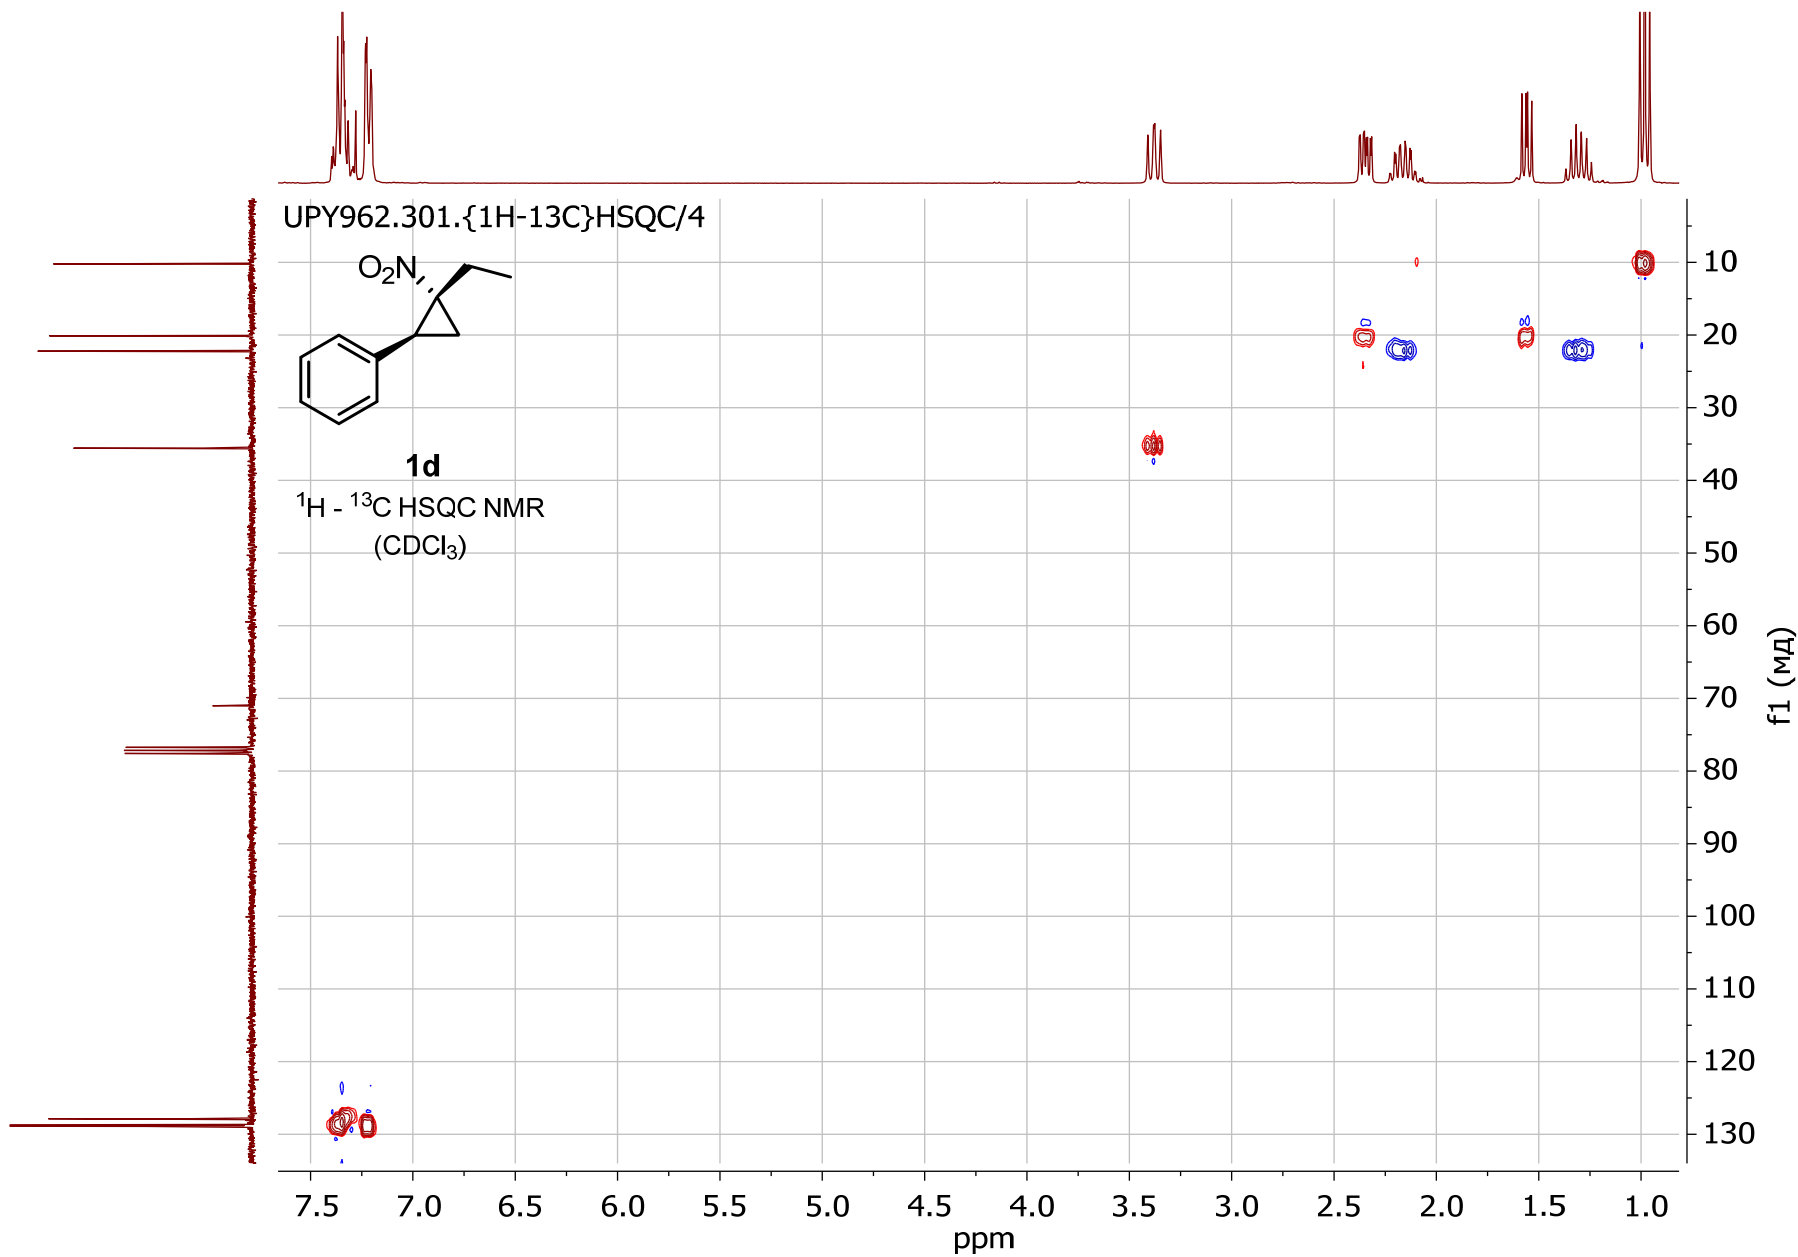

NMR of **1d**

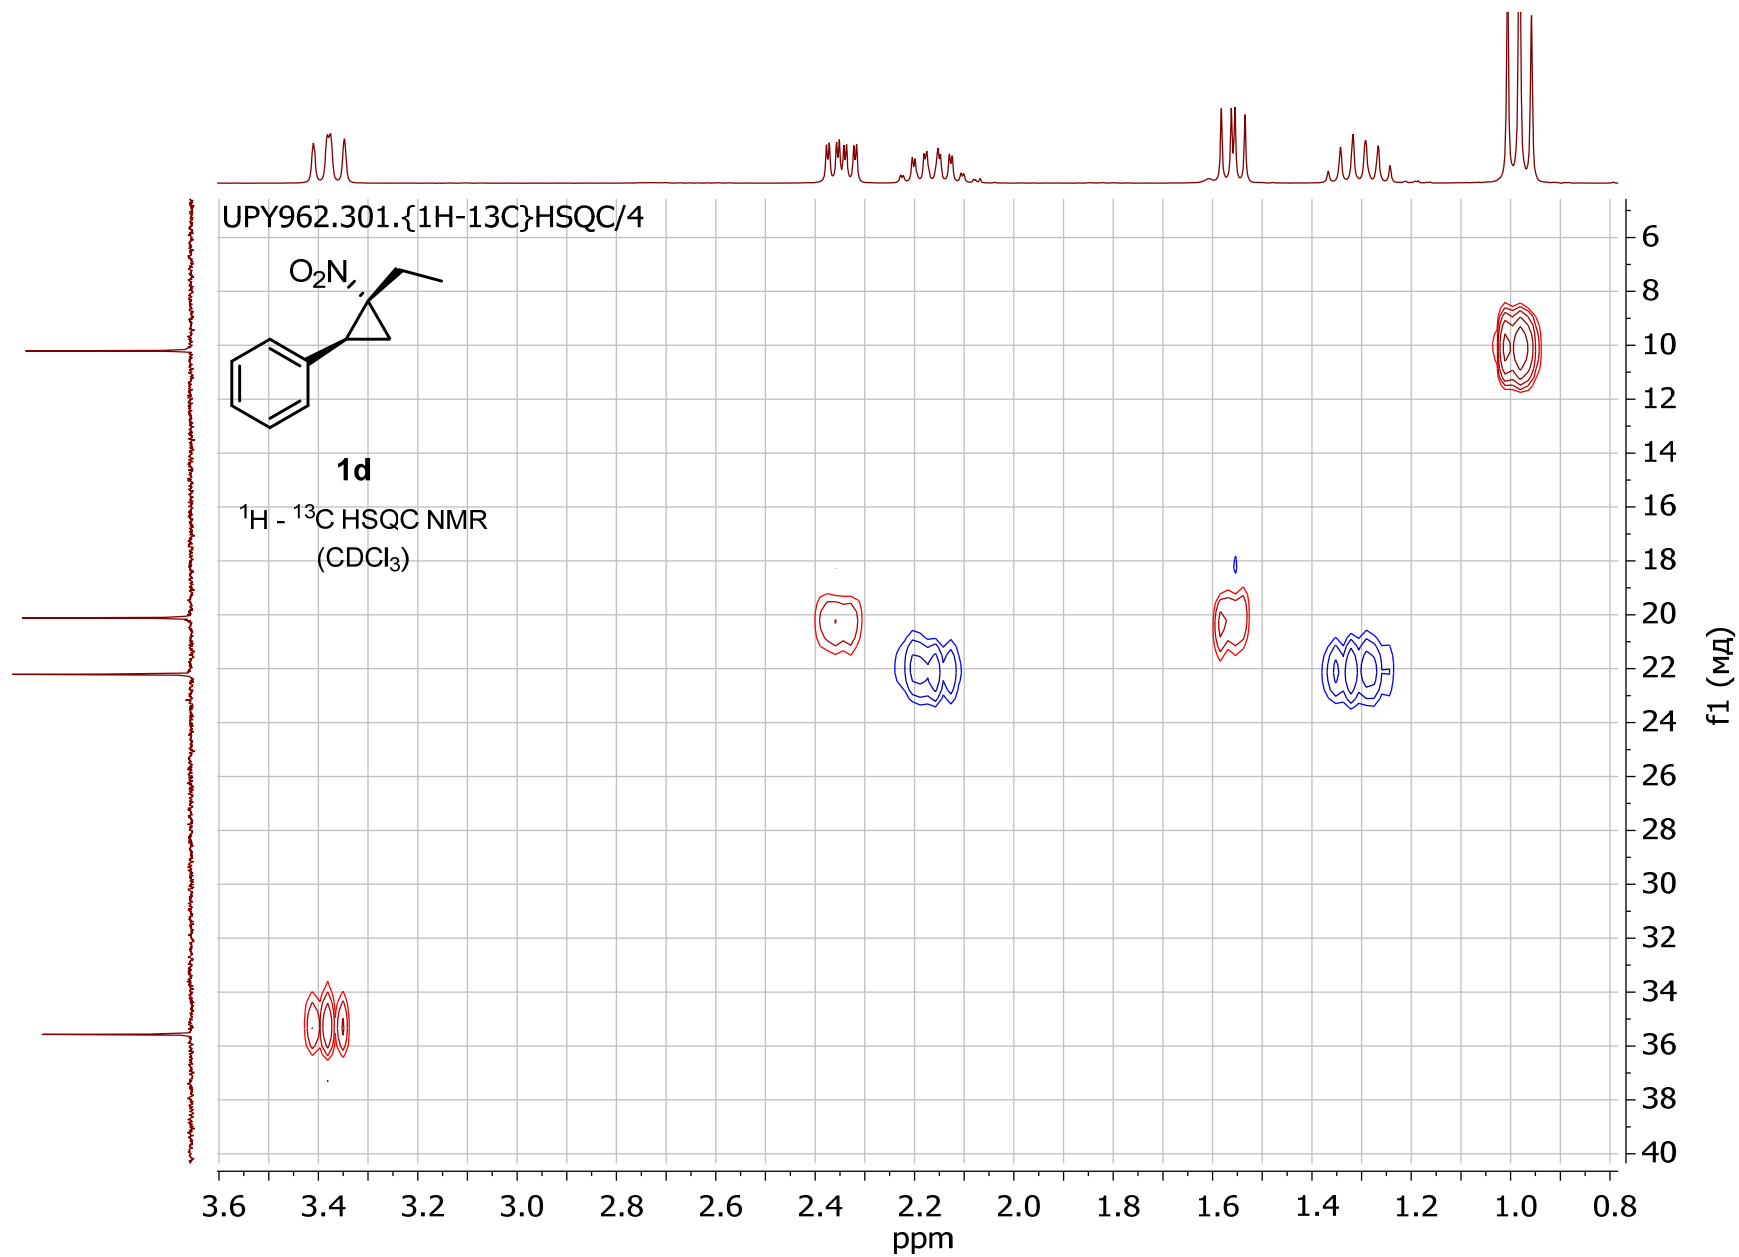

# NMR of **1d**

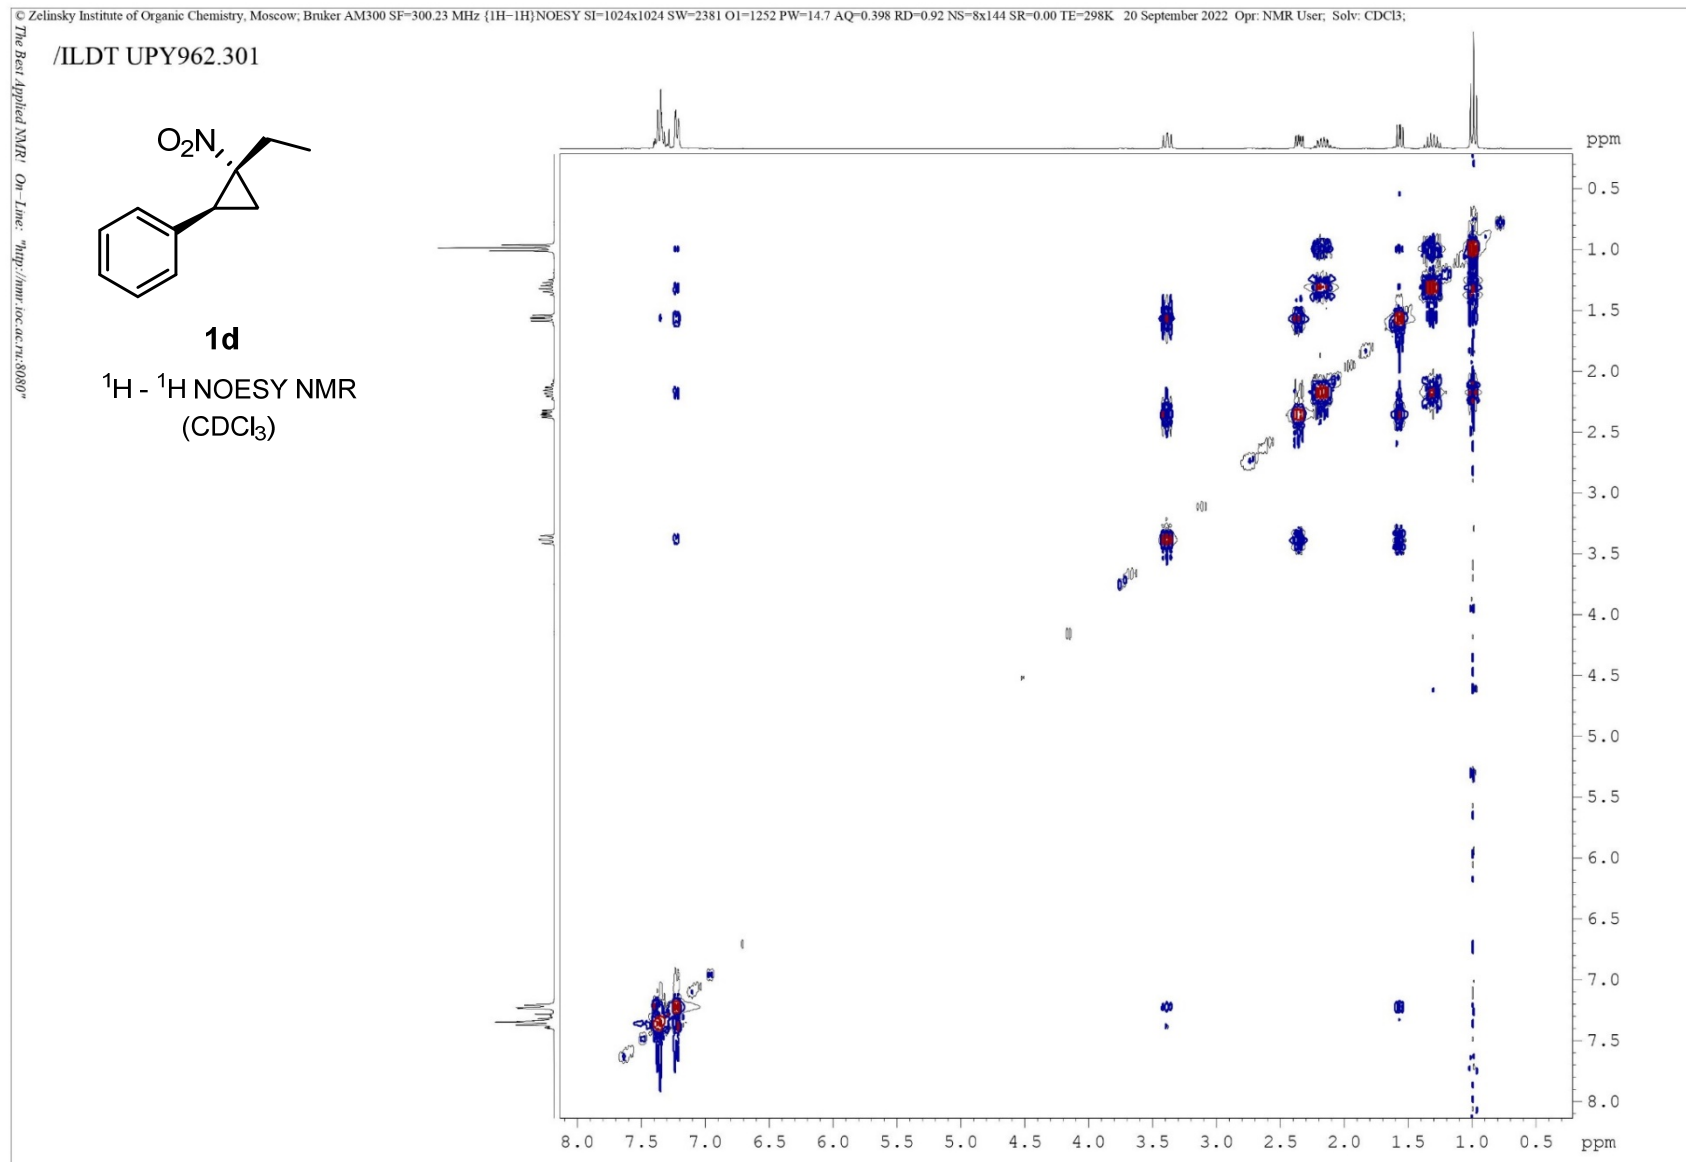

# FTIR (ATR) of 1d

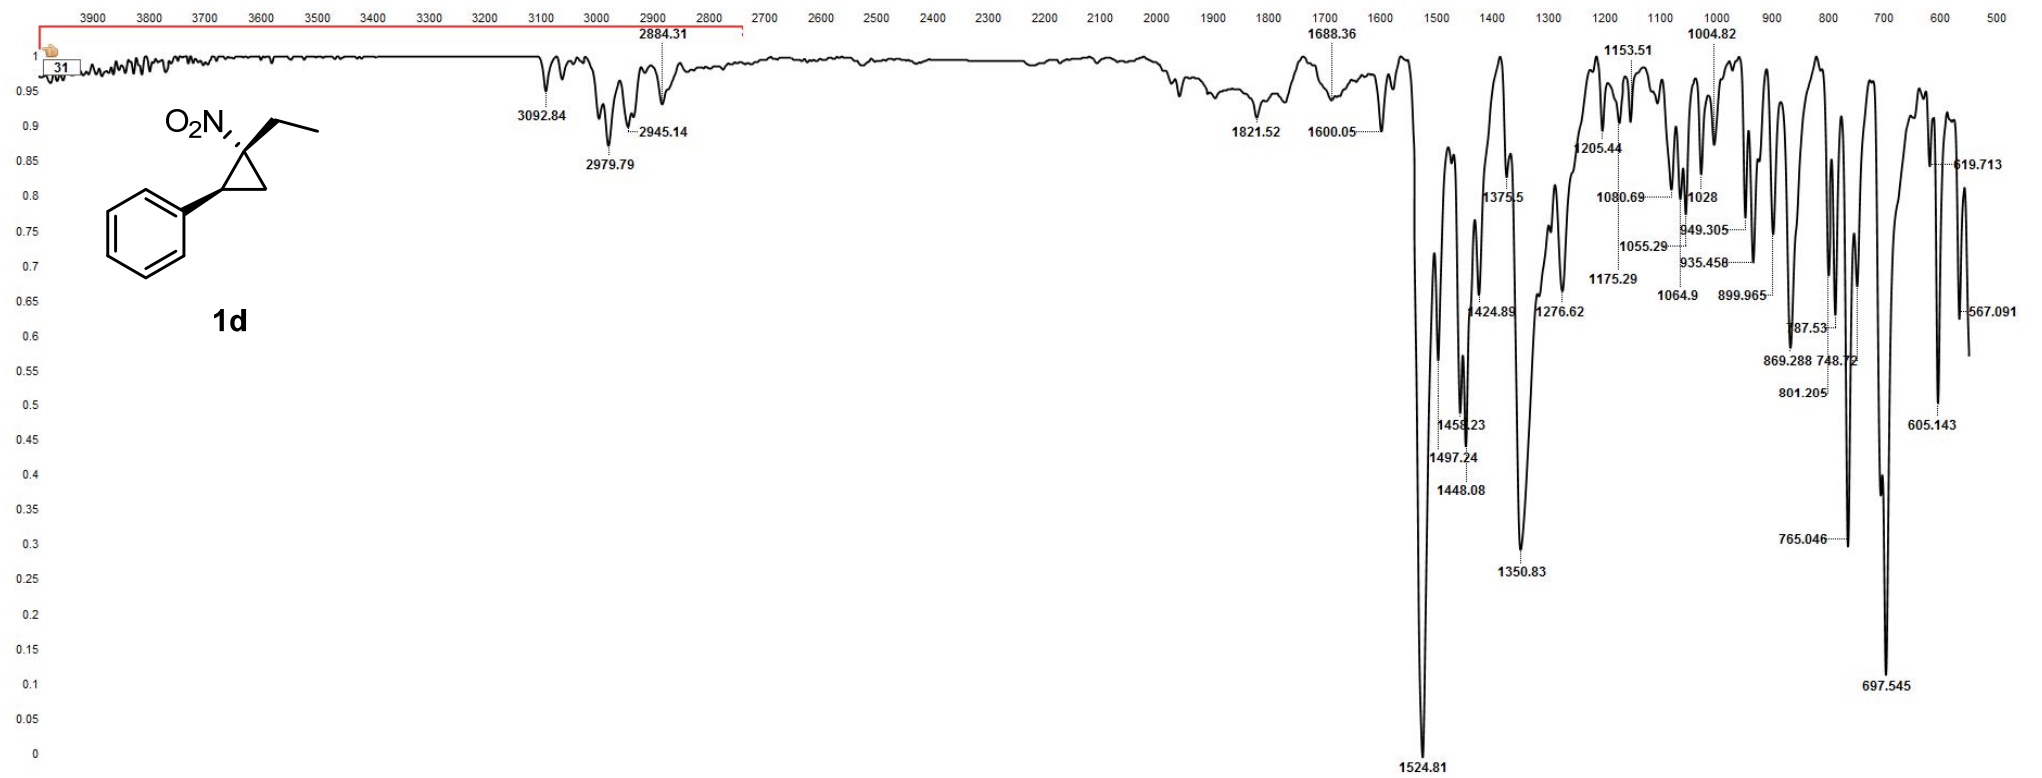

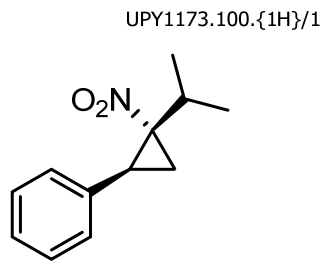

**1e**, *dr* = 7:1

<sup>1</sup>H NMR (300 MHz, CDCl<sub>3</sub>)

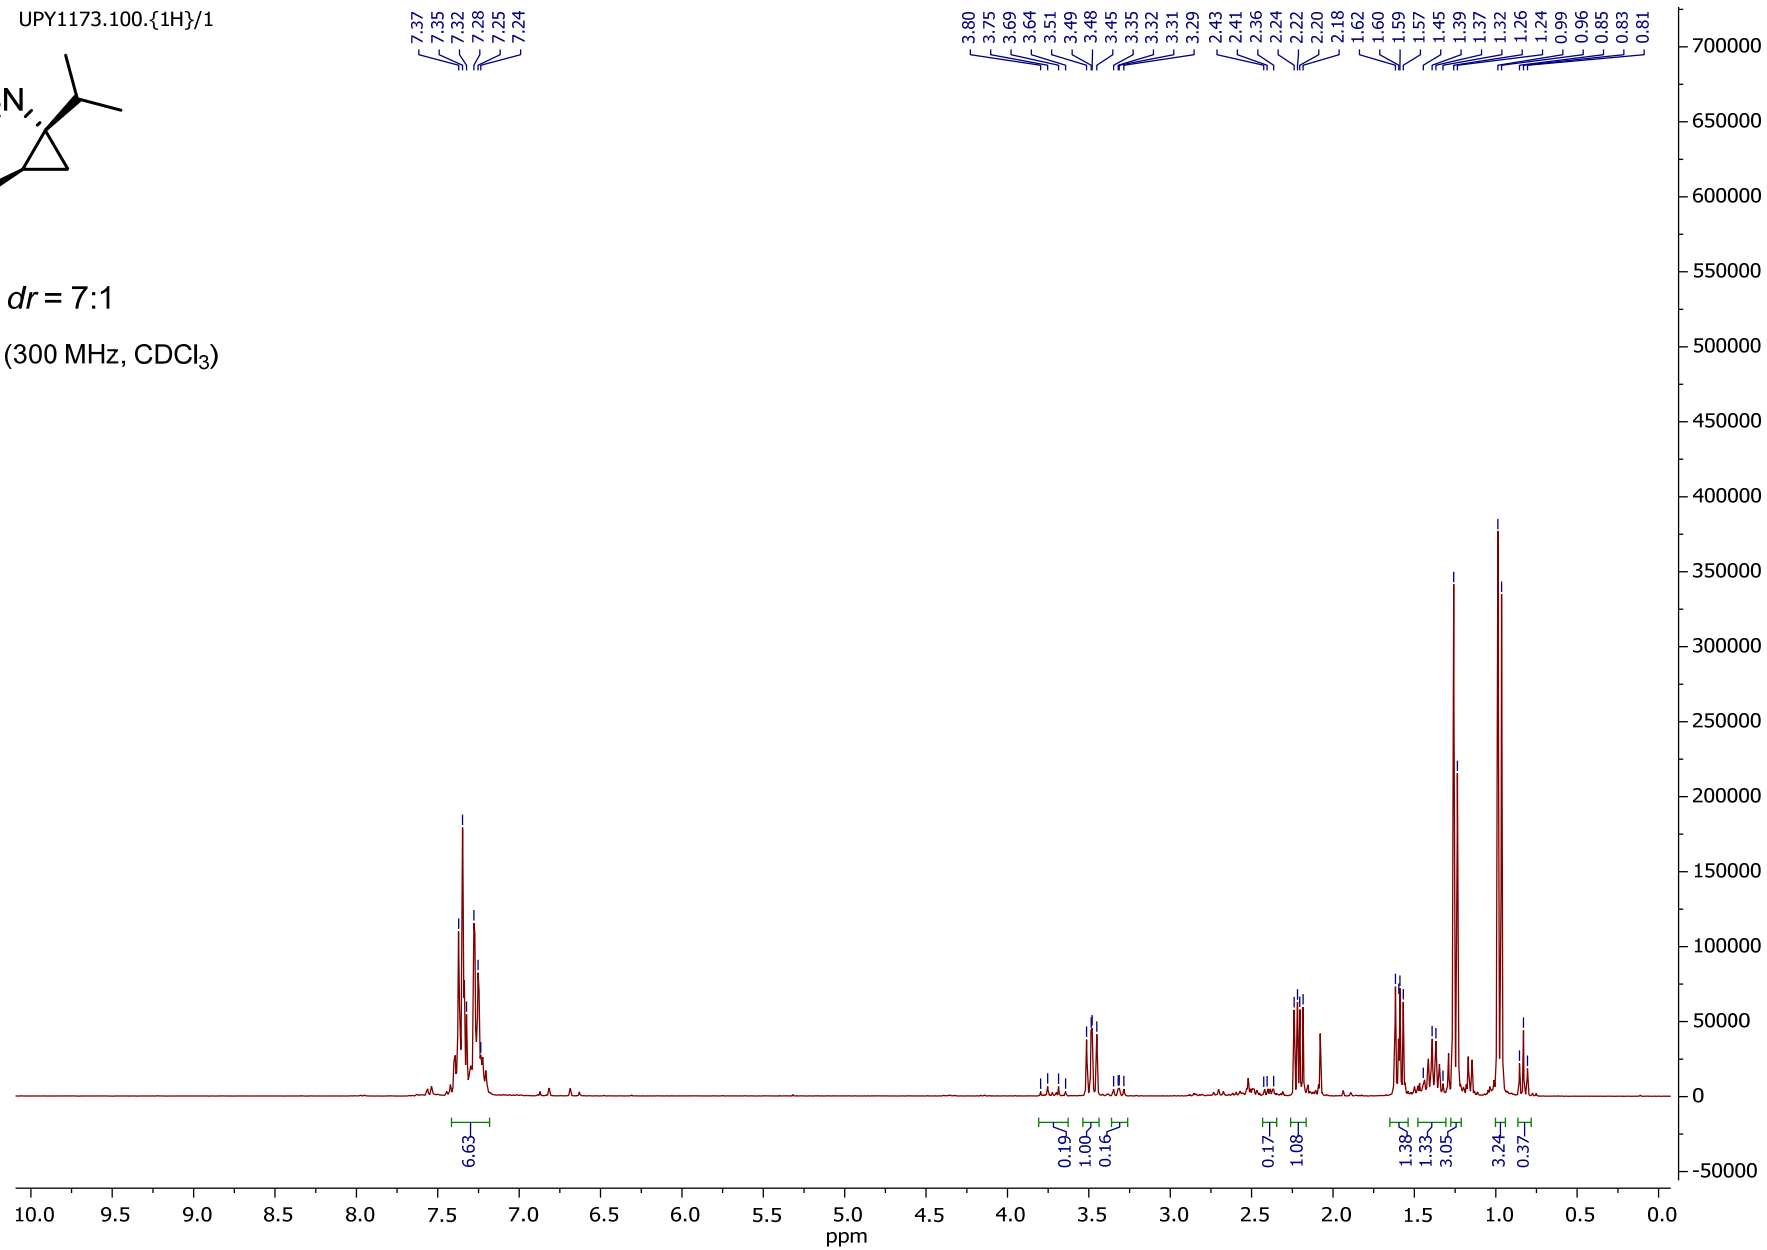

# NMR of 1e

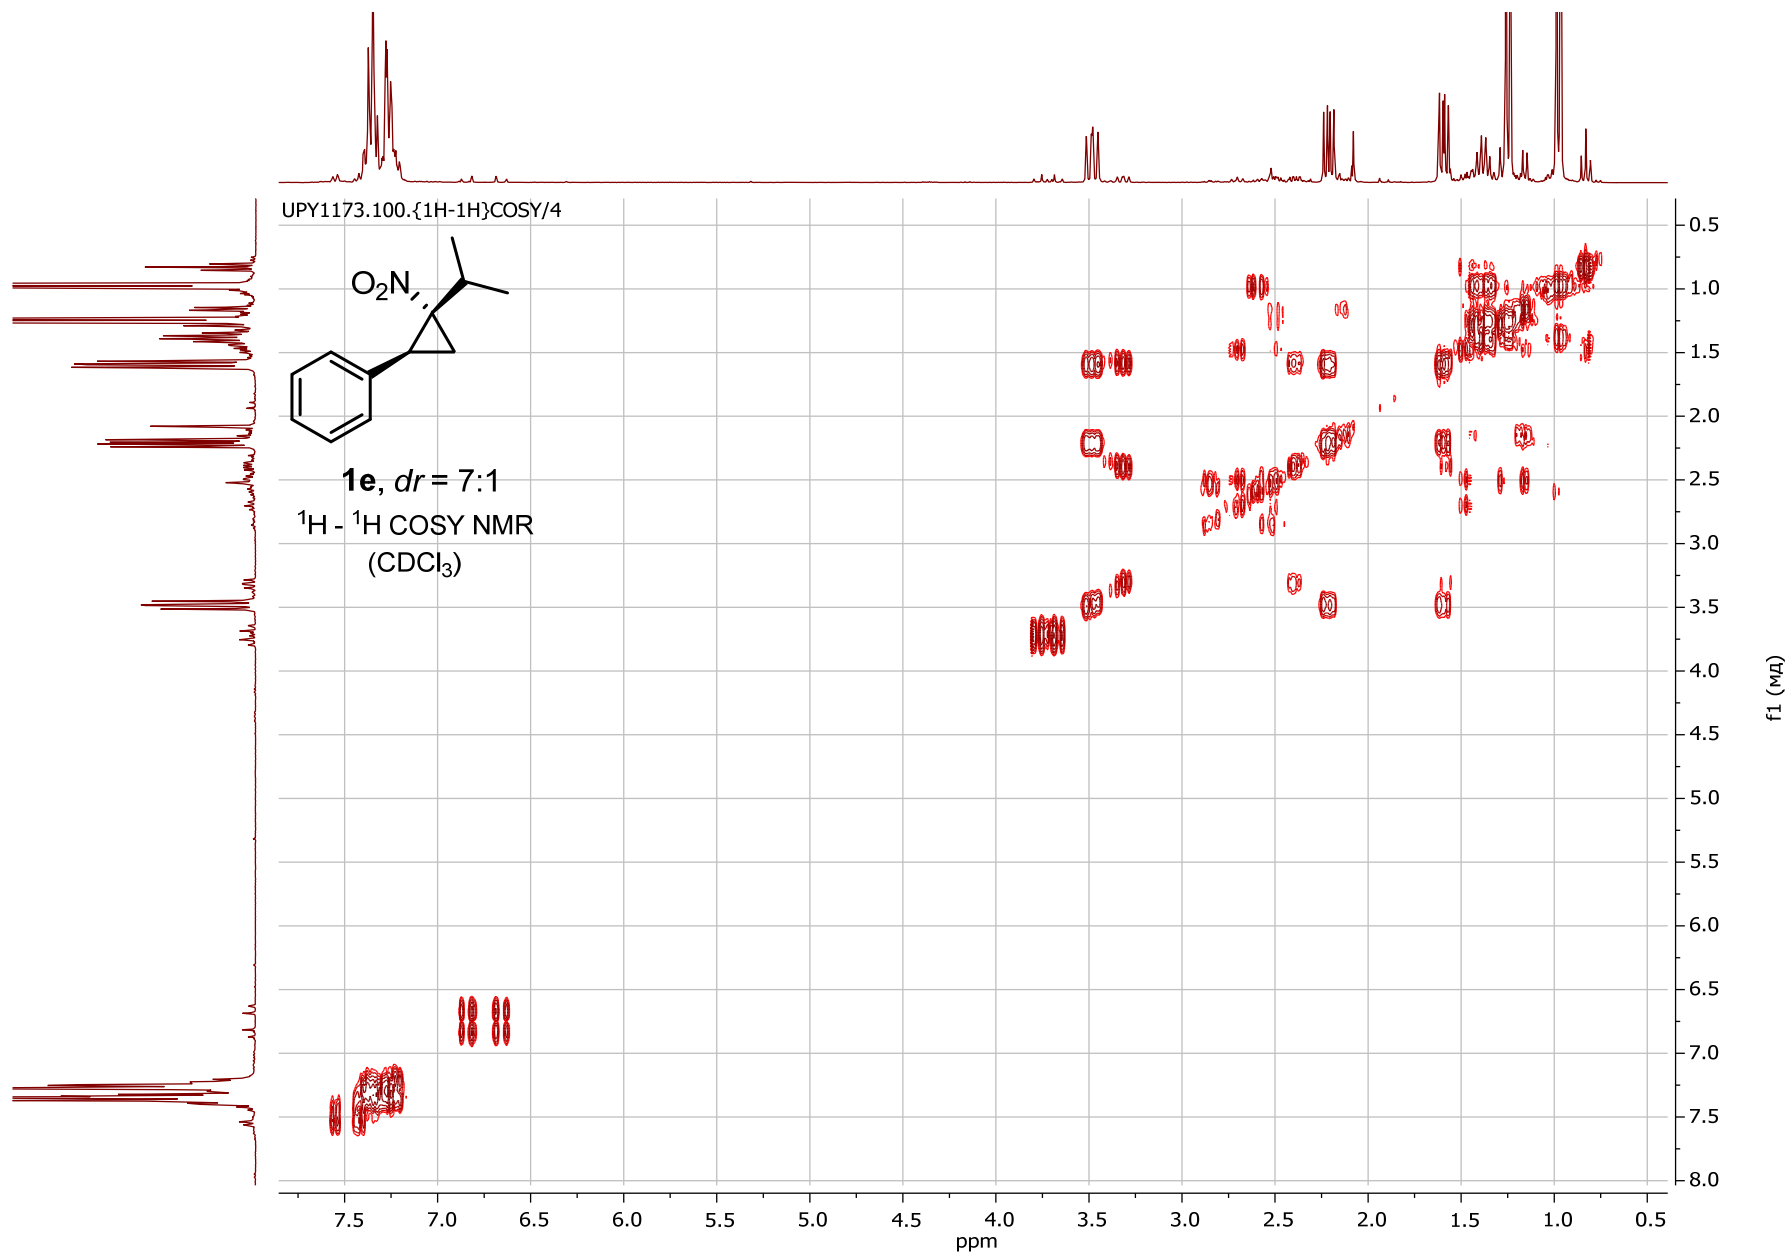

UPY1173.100.{13C}/2

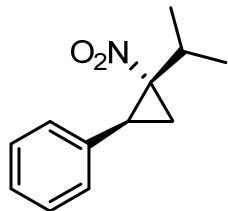

**1e**, *dr* = 7:1

<sup>13</sup>C NMR (75 MHz, CDCl<sub>3</sub>)

### NMR of **1e**

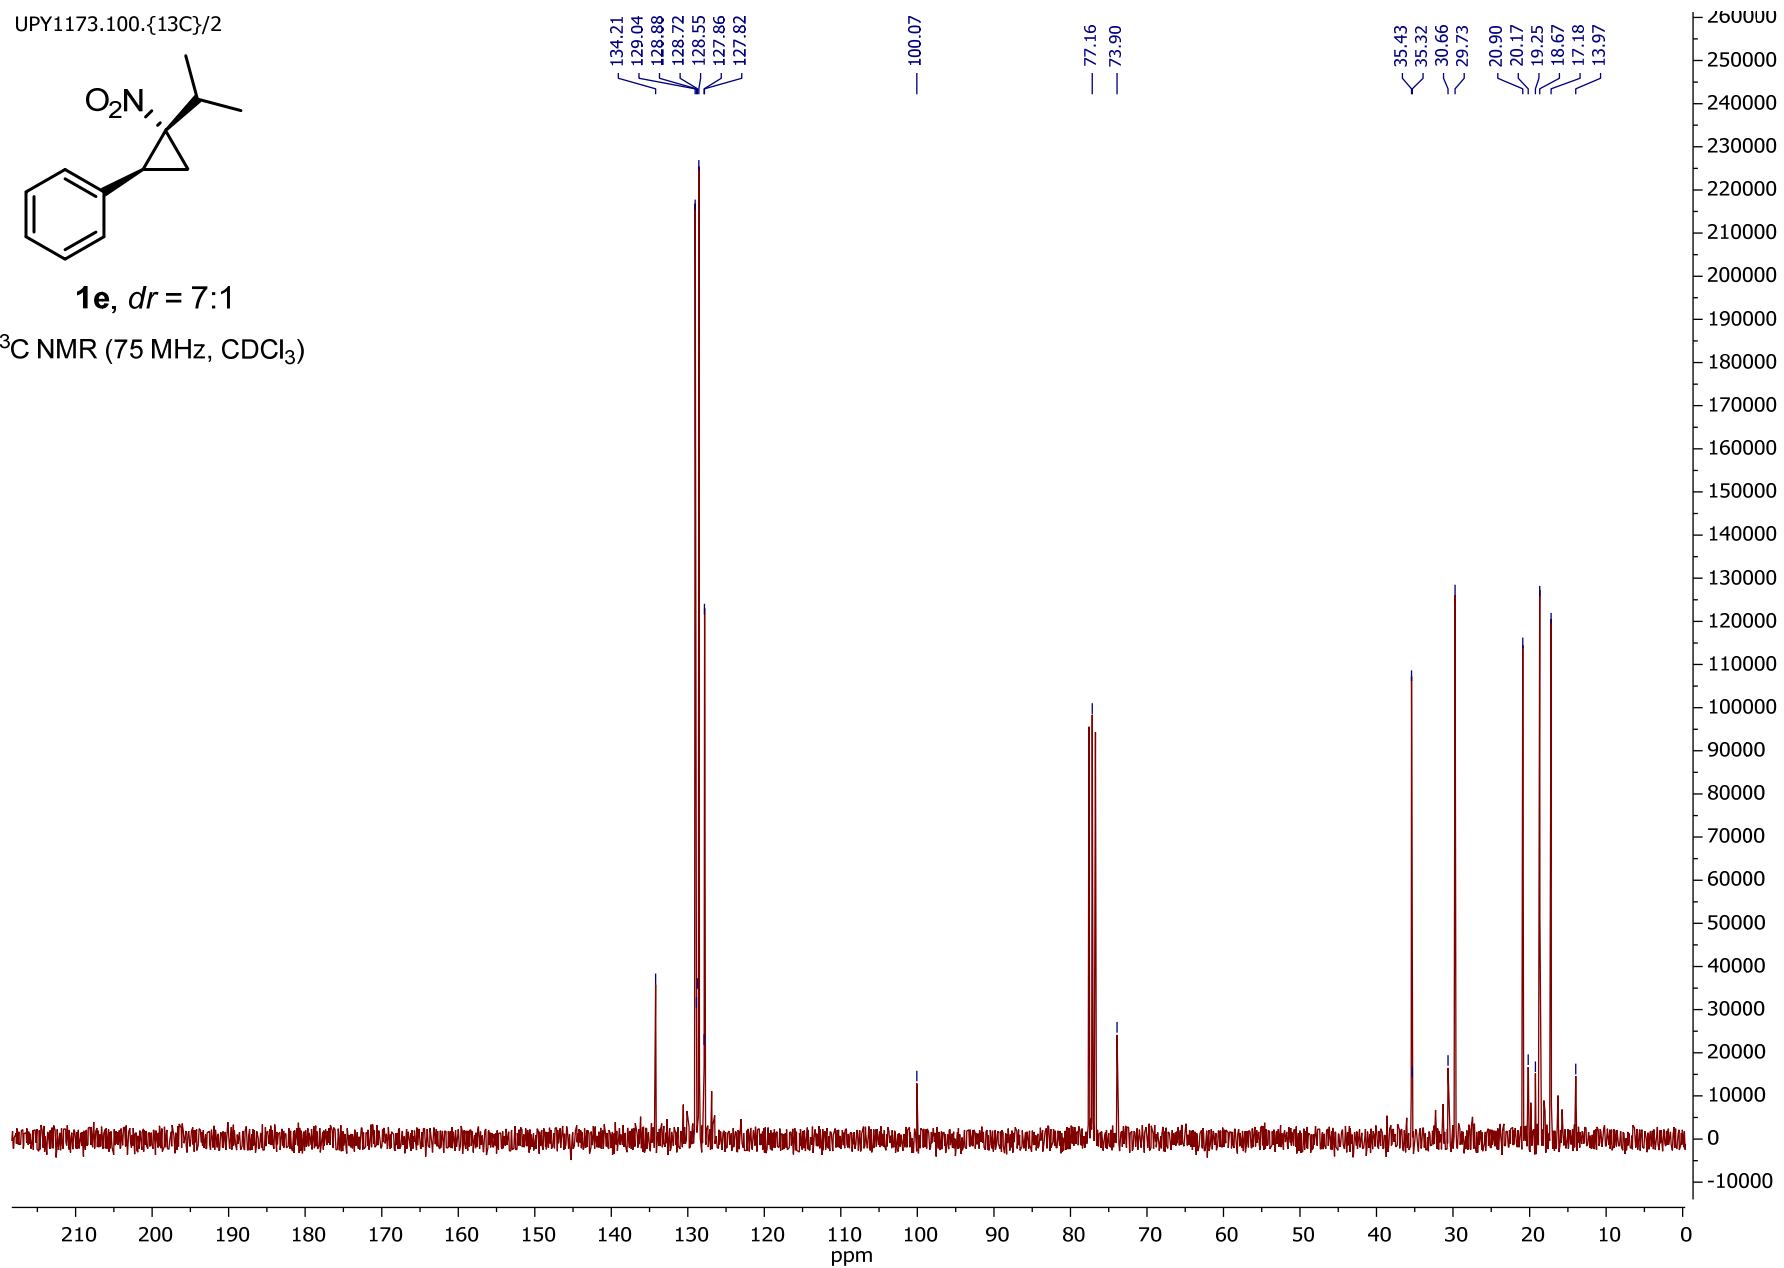

# NMR of **1e**

UPY1173.100.{13C}deptsp135/3

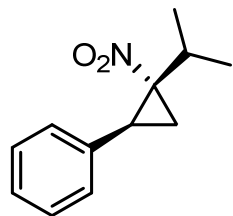

**1e**, *dr* = 7:1

<sup>13</sup>C DEPT NMR  
(75 MHz, CDCl<sub>3</sub>)

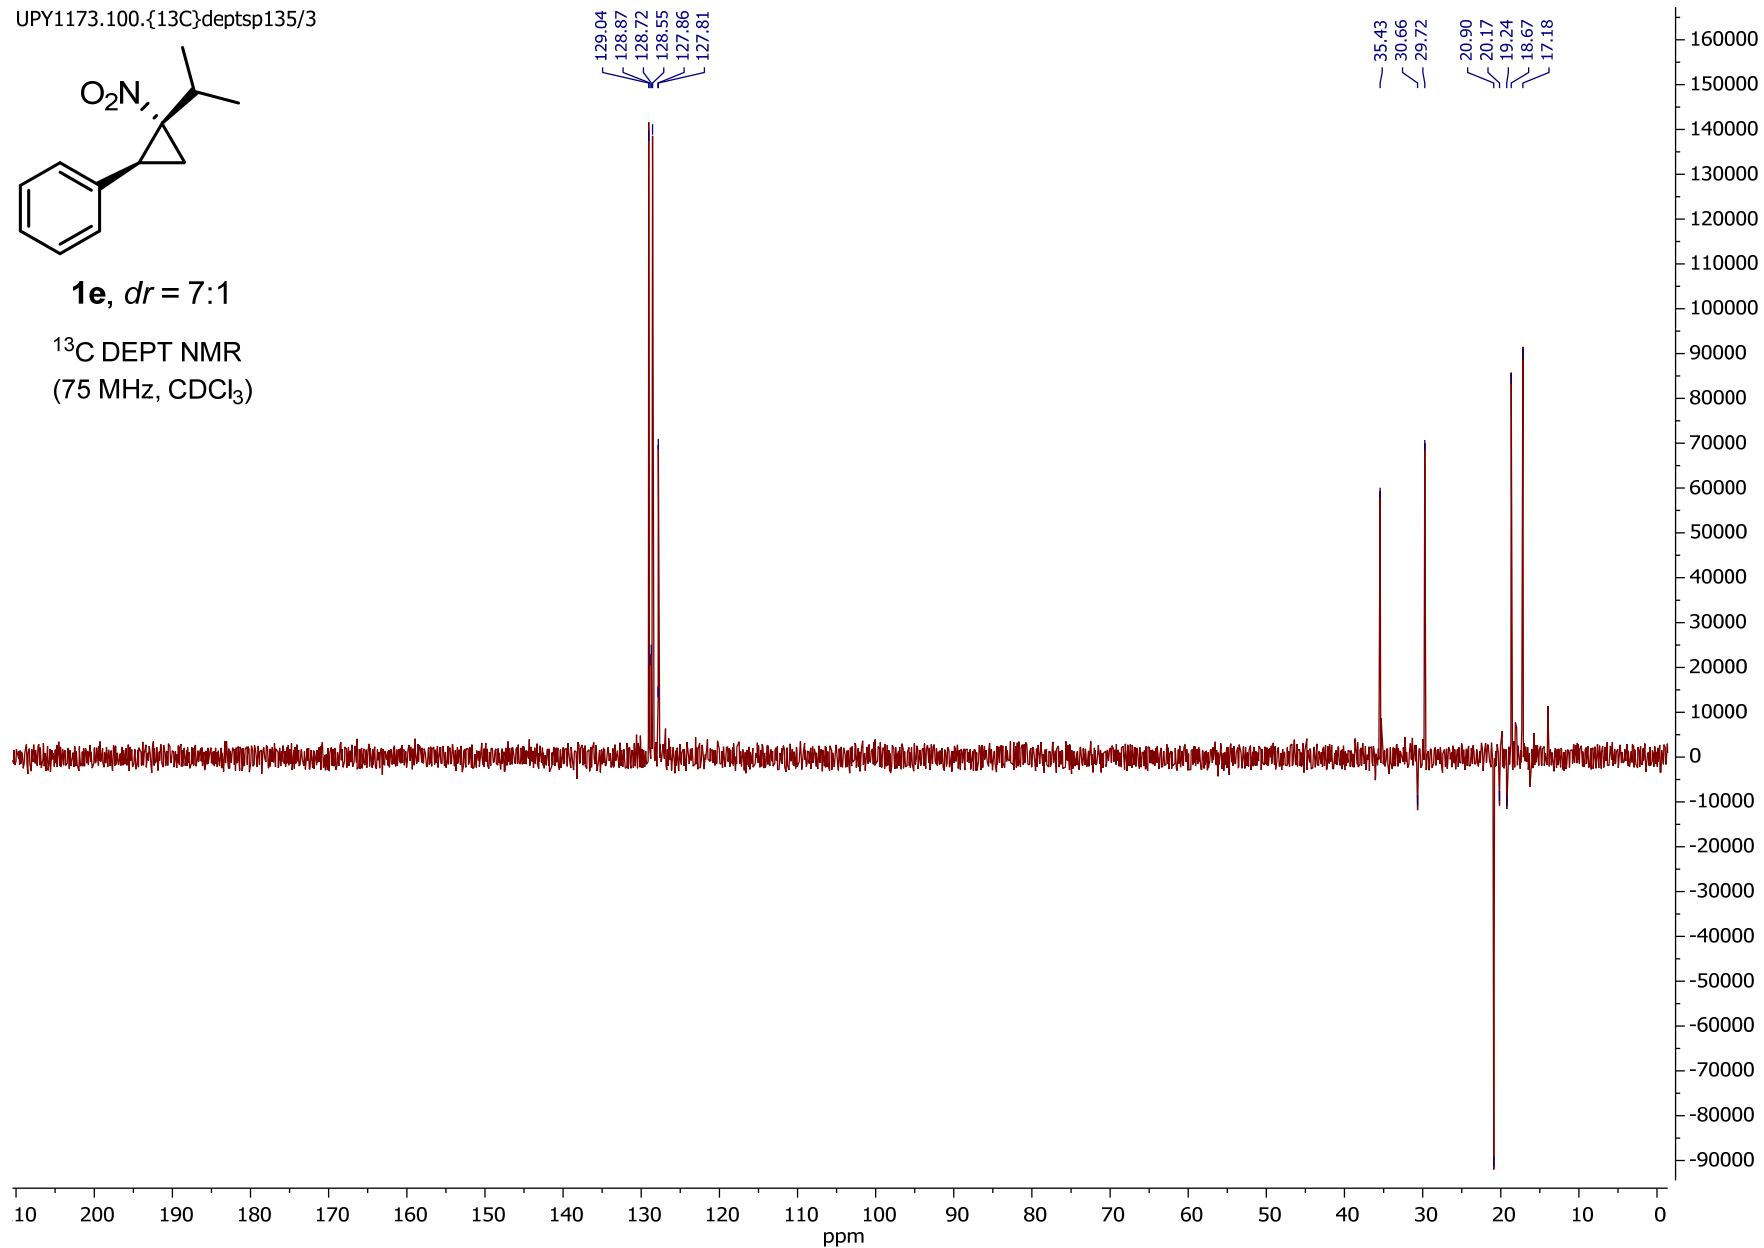



NMR of **1e**

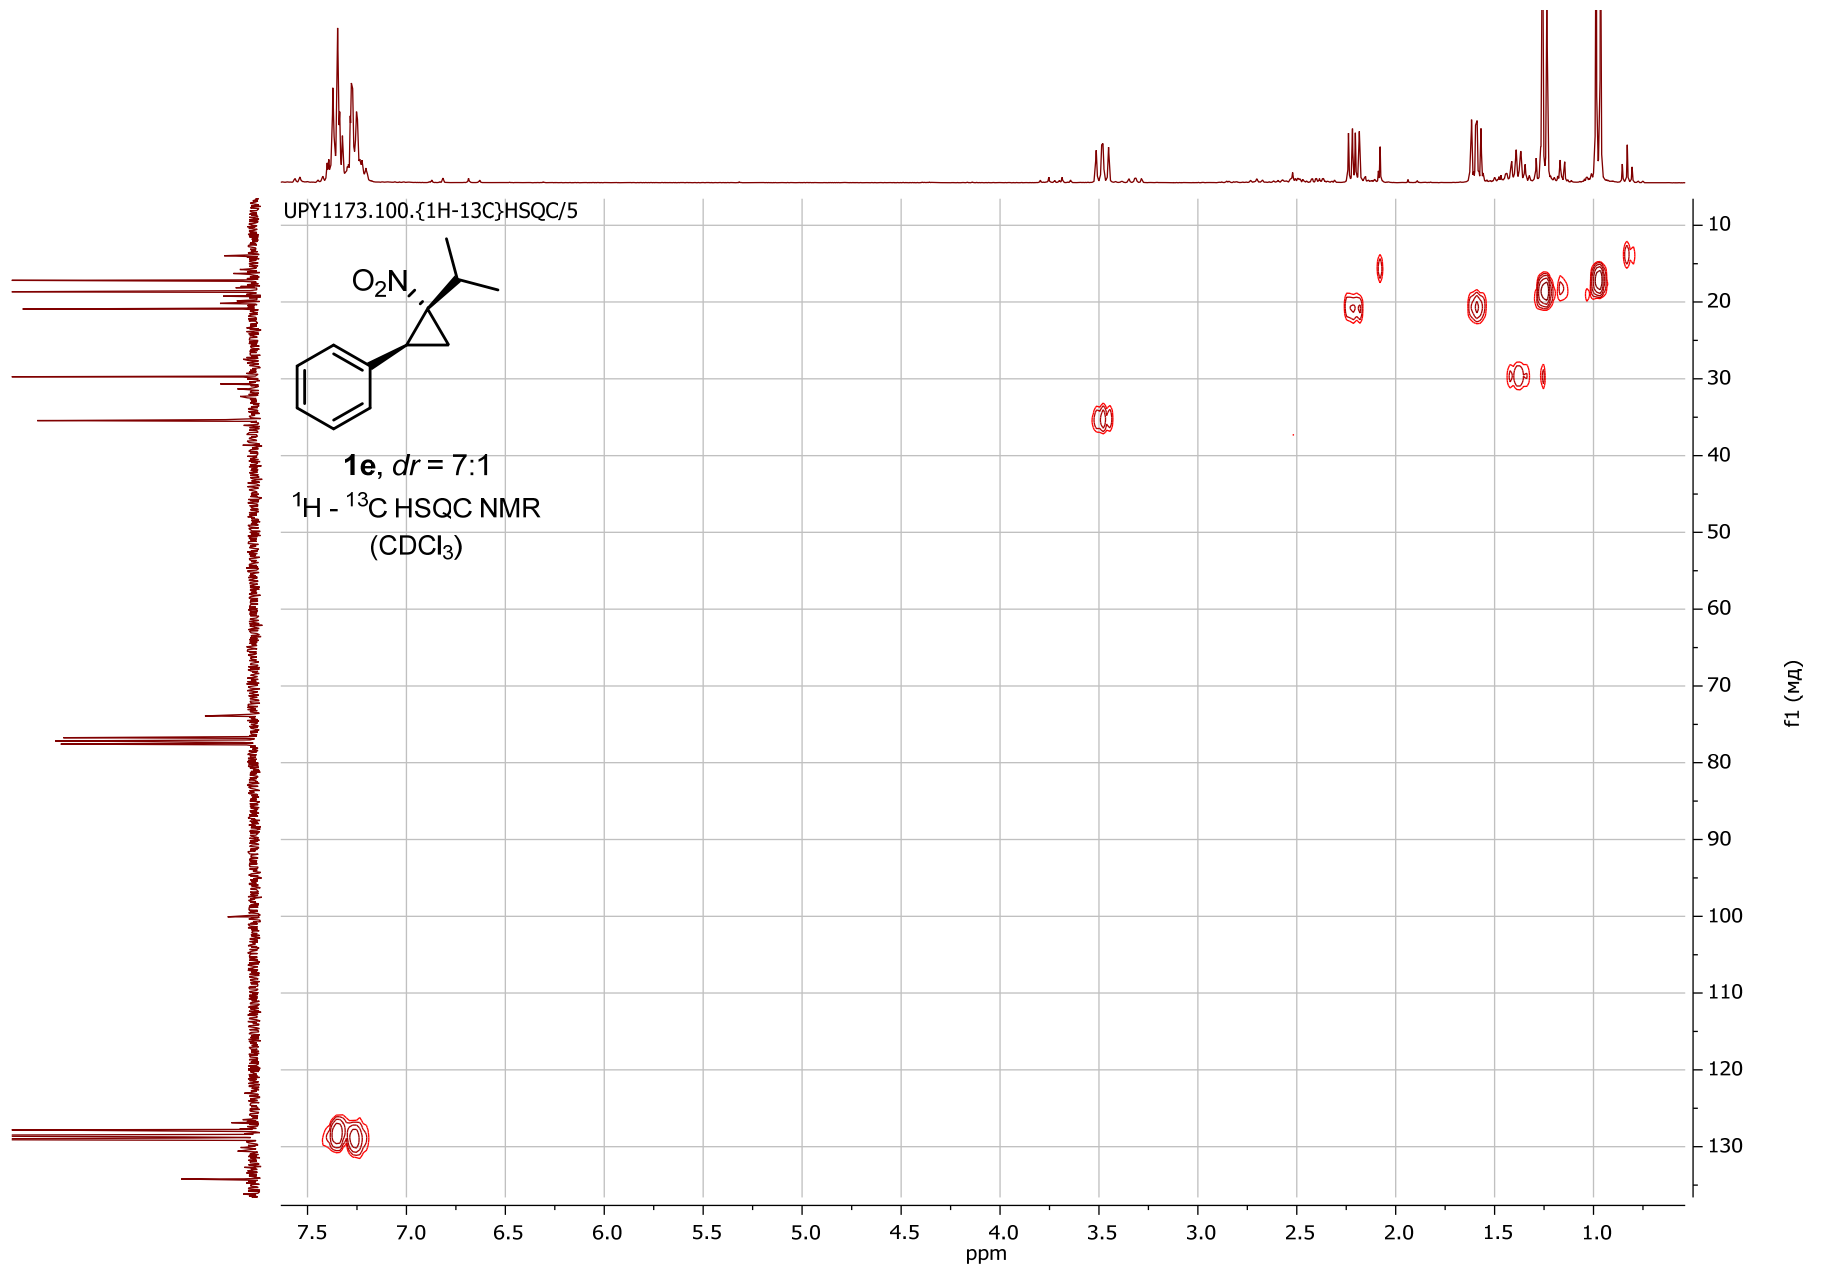

# NMR of **1e**

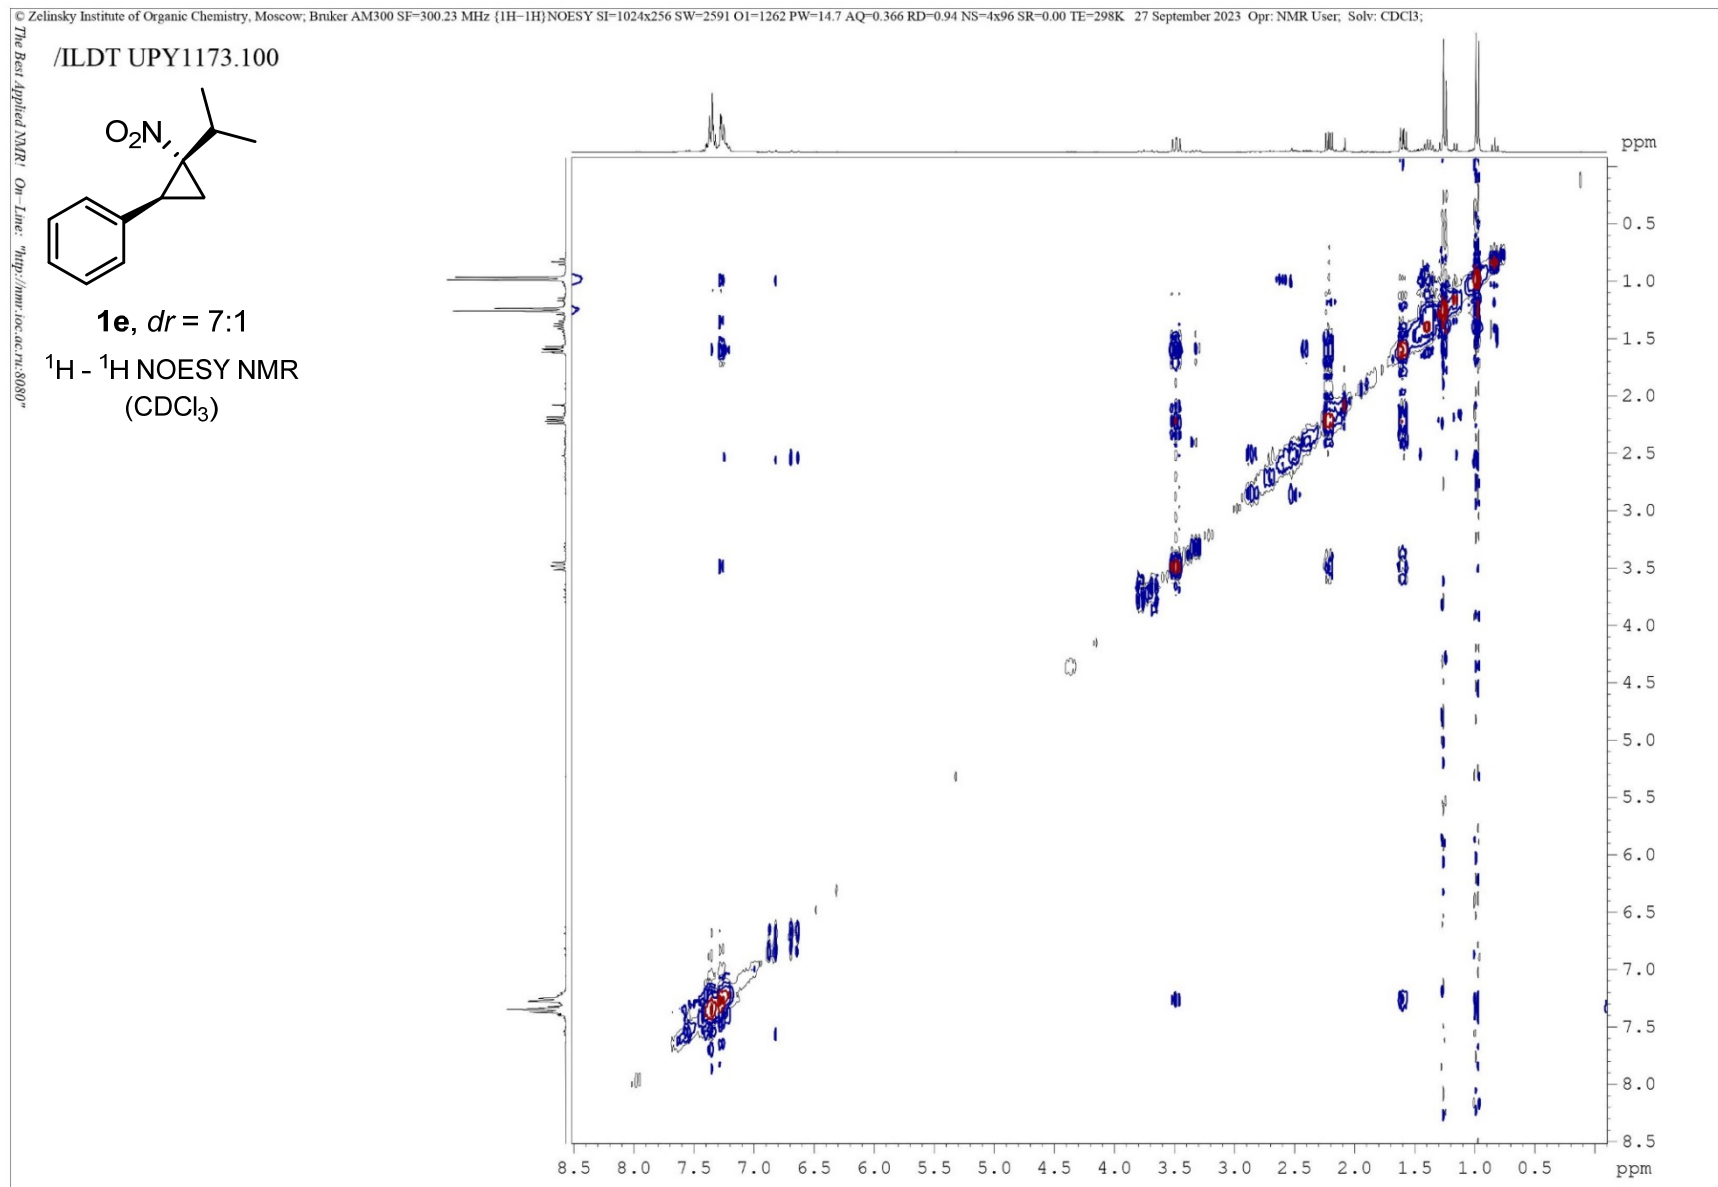

# NMR of 1f

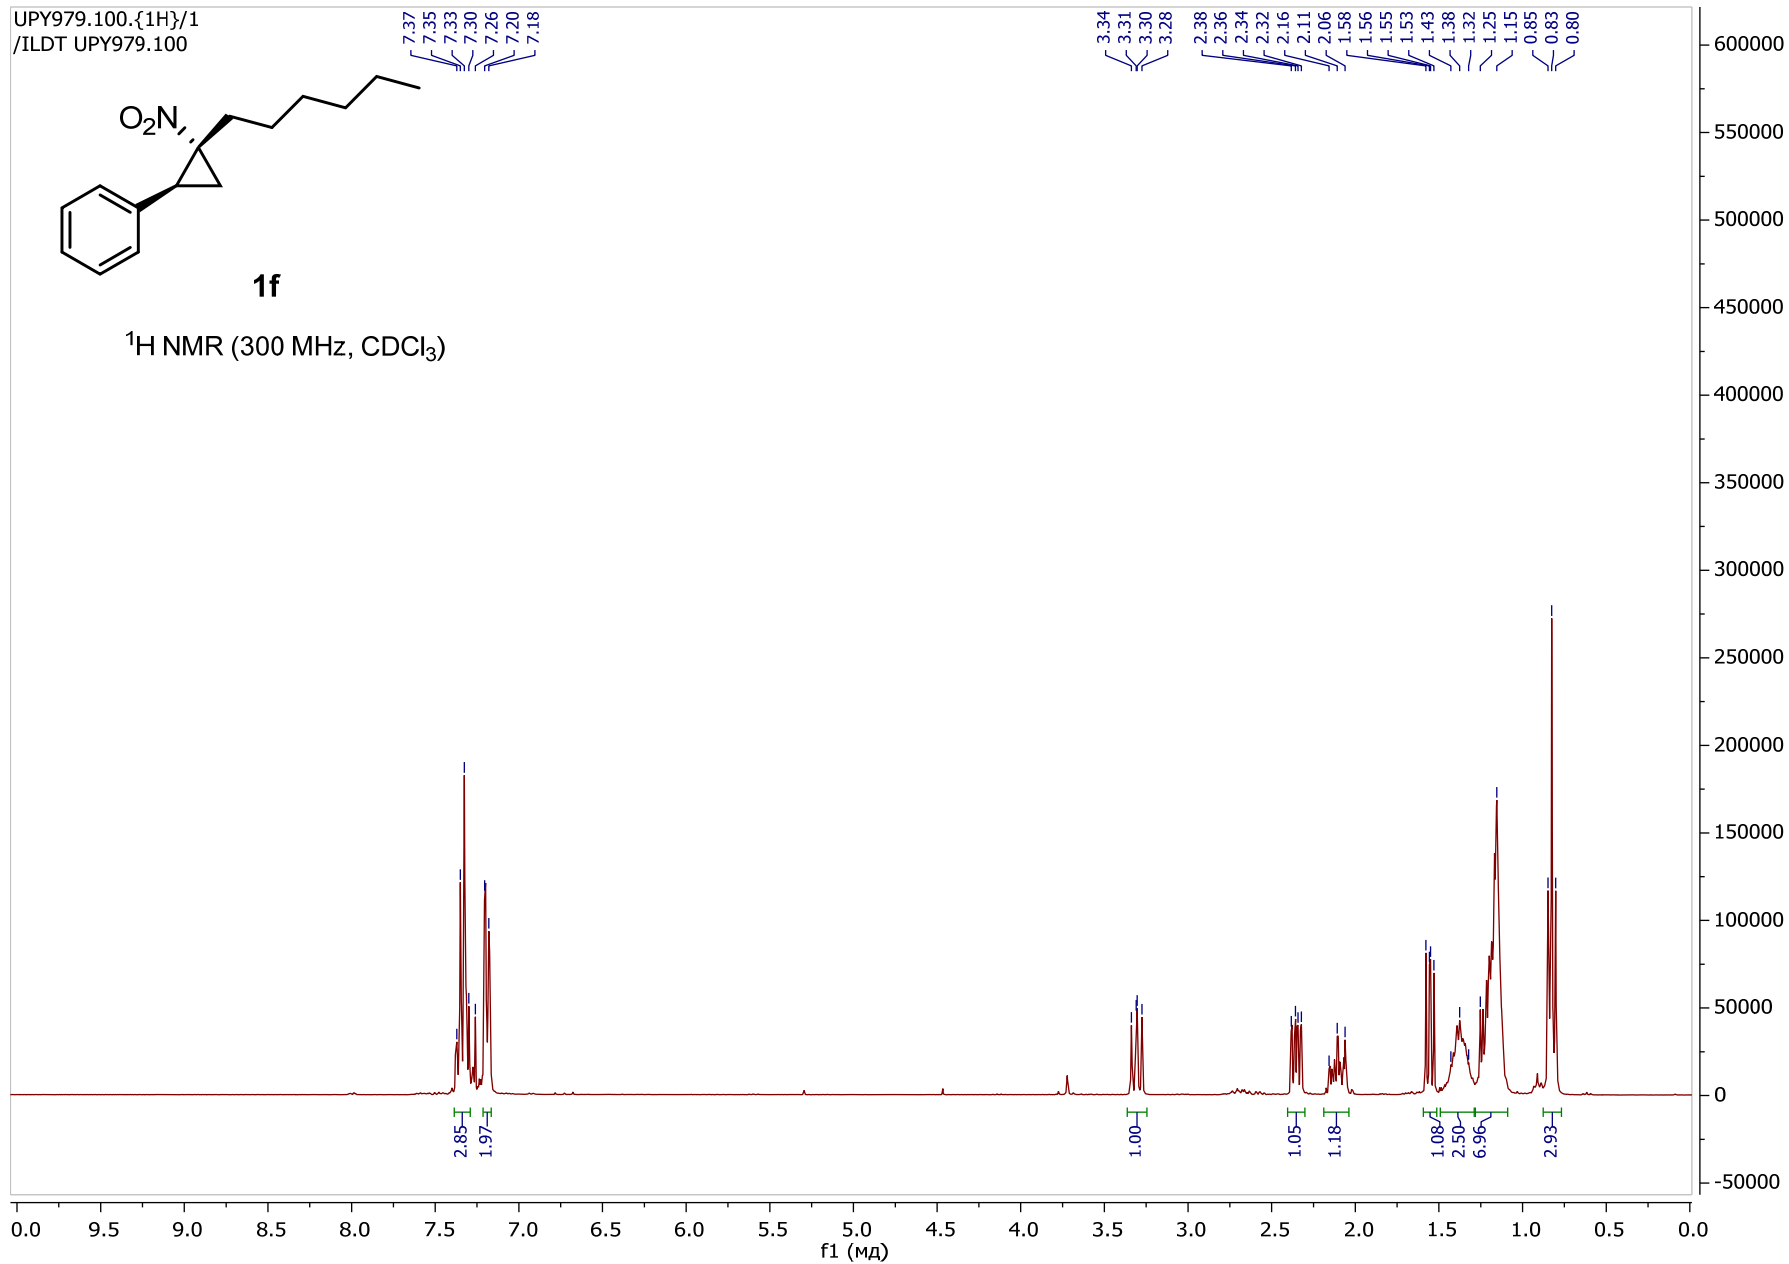

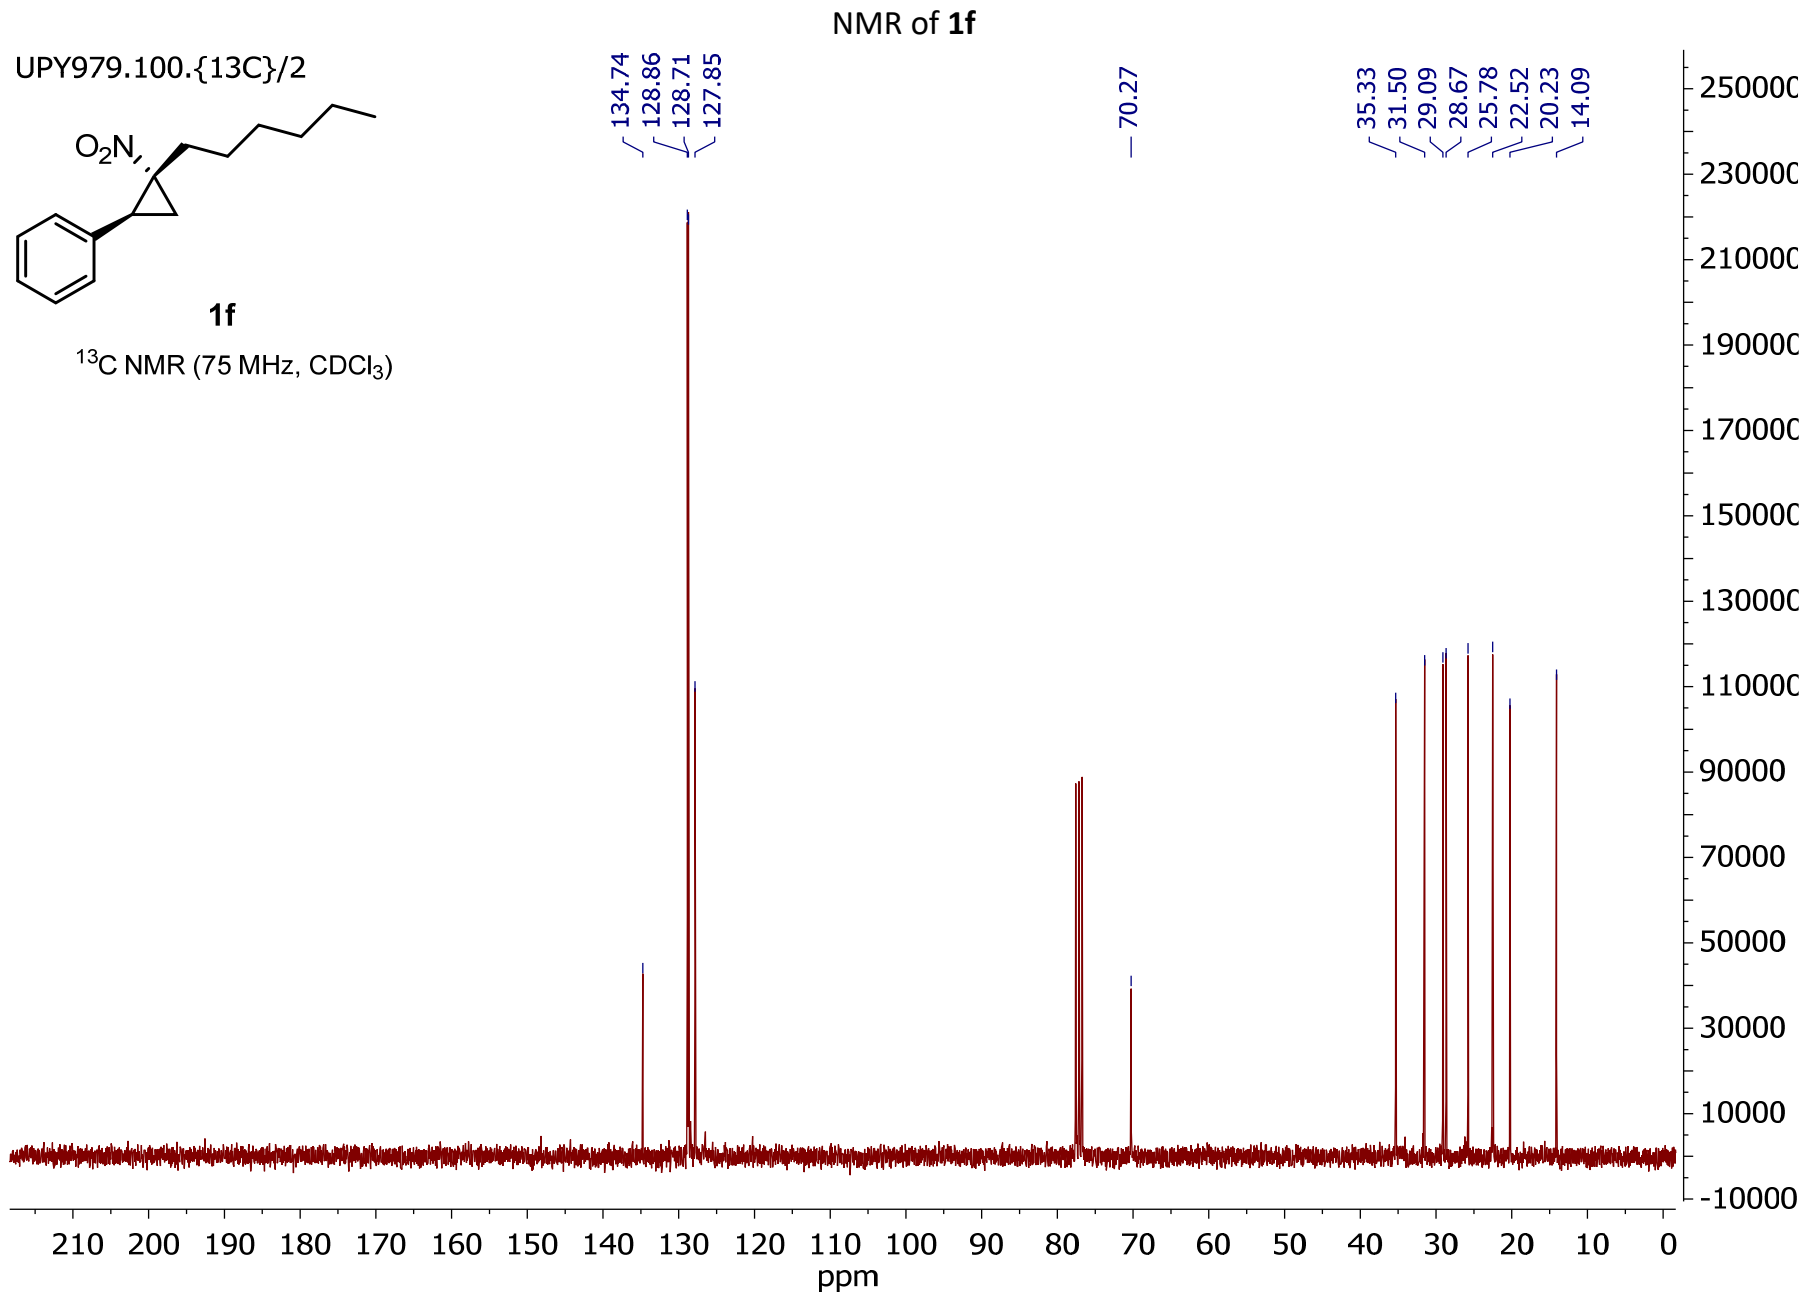

# NMR of 1f

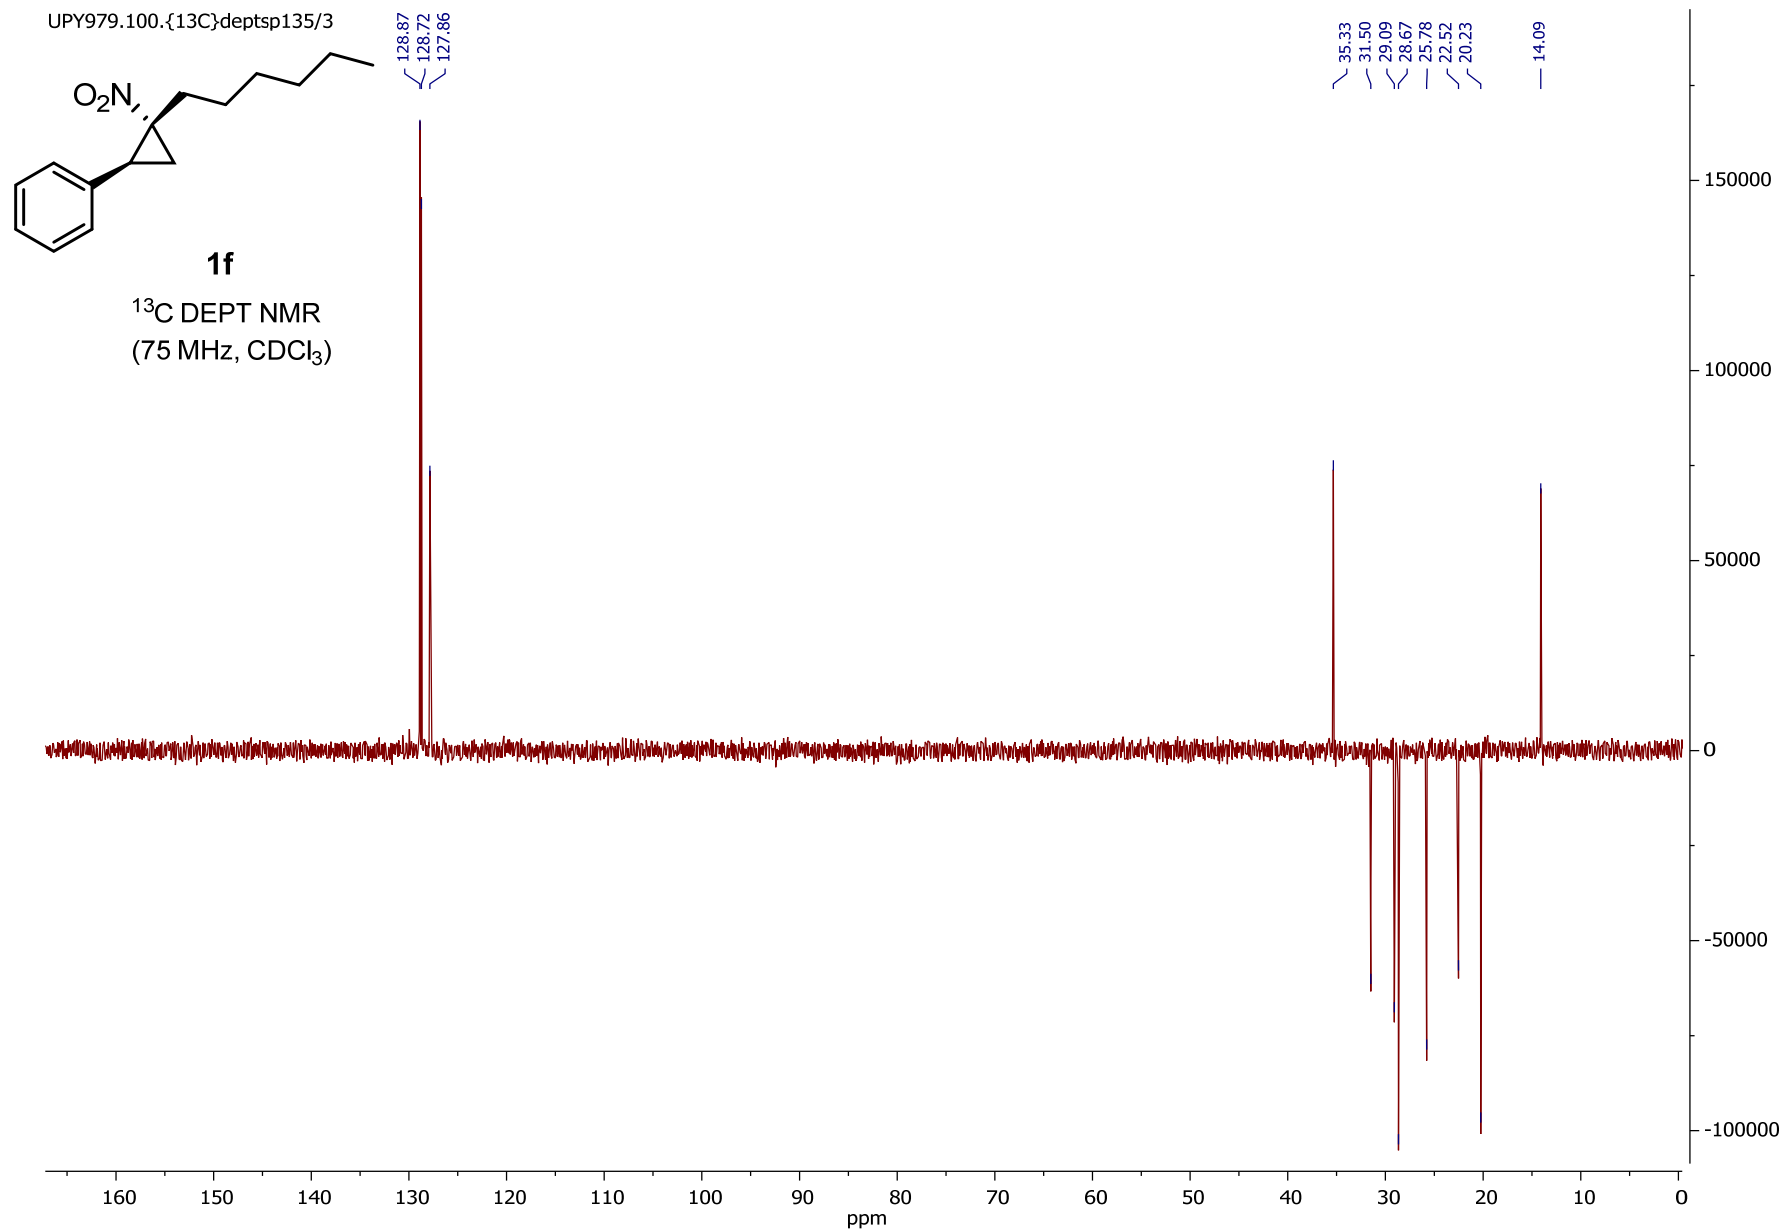

UPY1064.100-1.{1H}/1

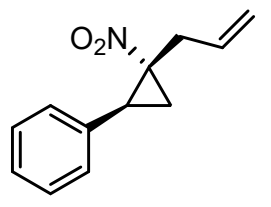

**1g**, *dr* = 16:1

<sup>1</sup>H NMR (300 MHz, CDCl<sub>3</sub>)

### NMR of **1g**

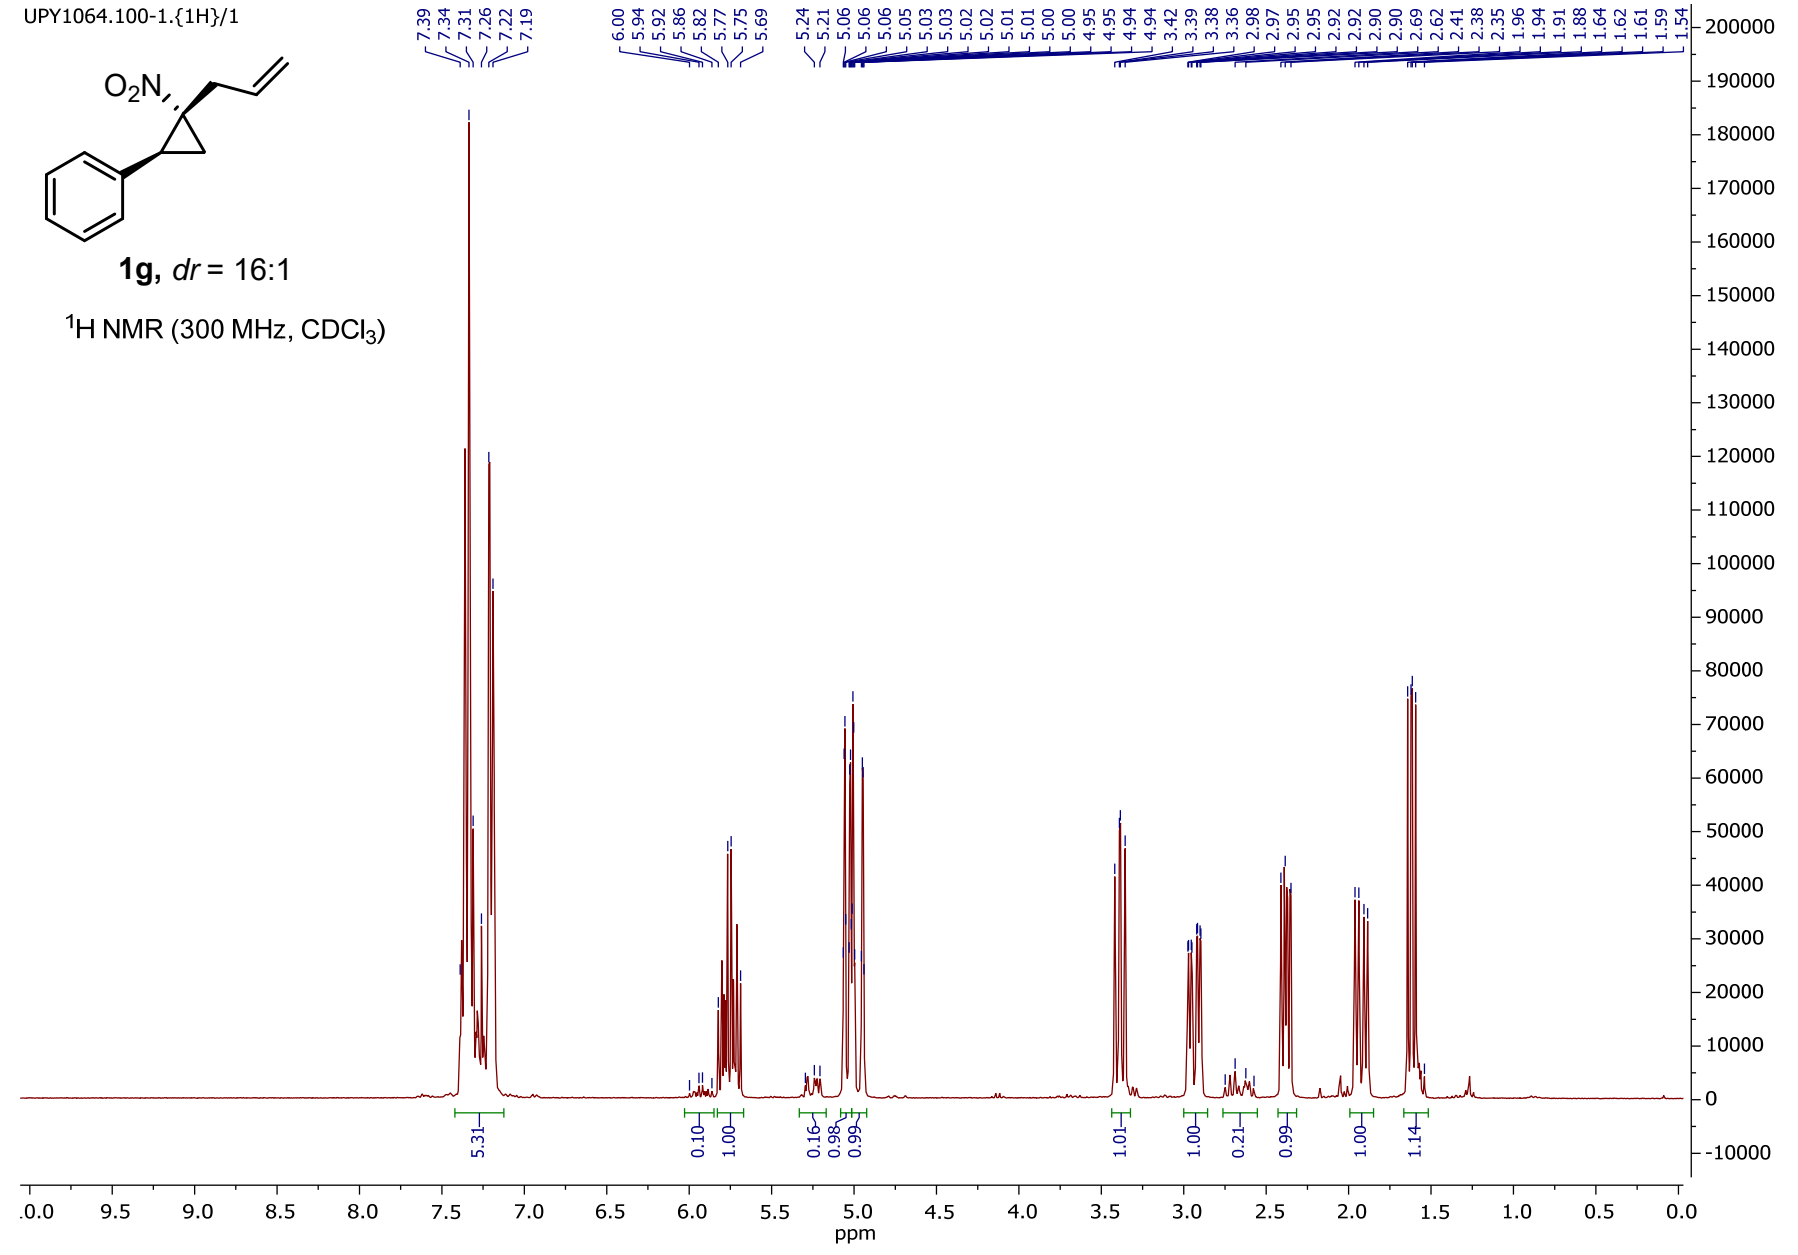

NMR of **1g**

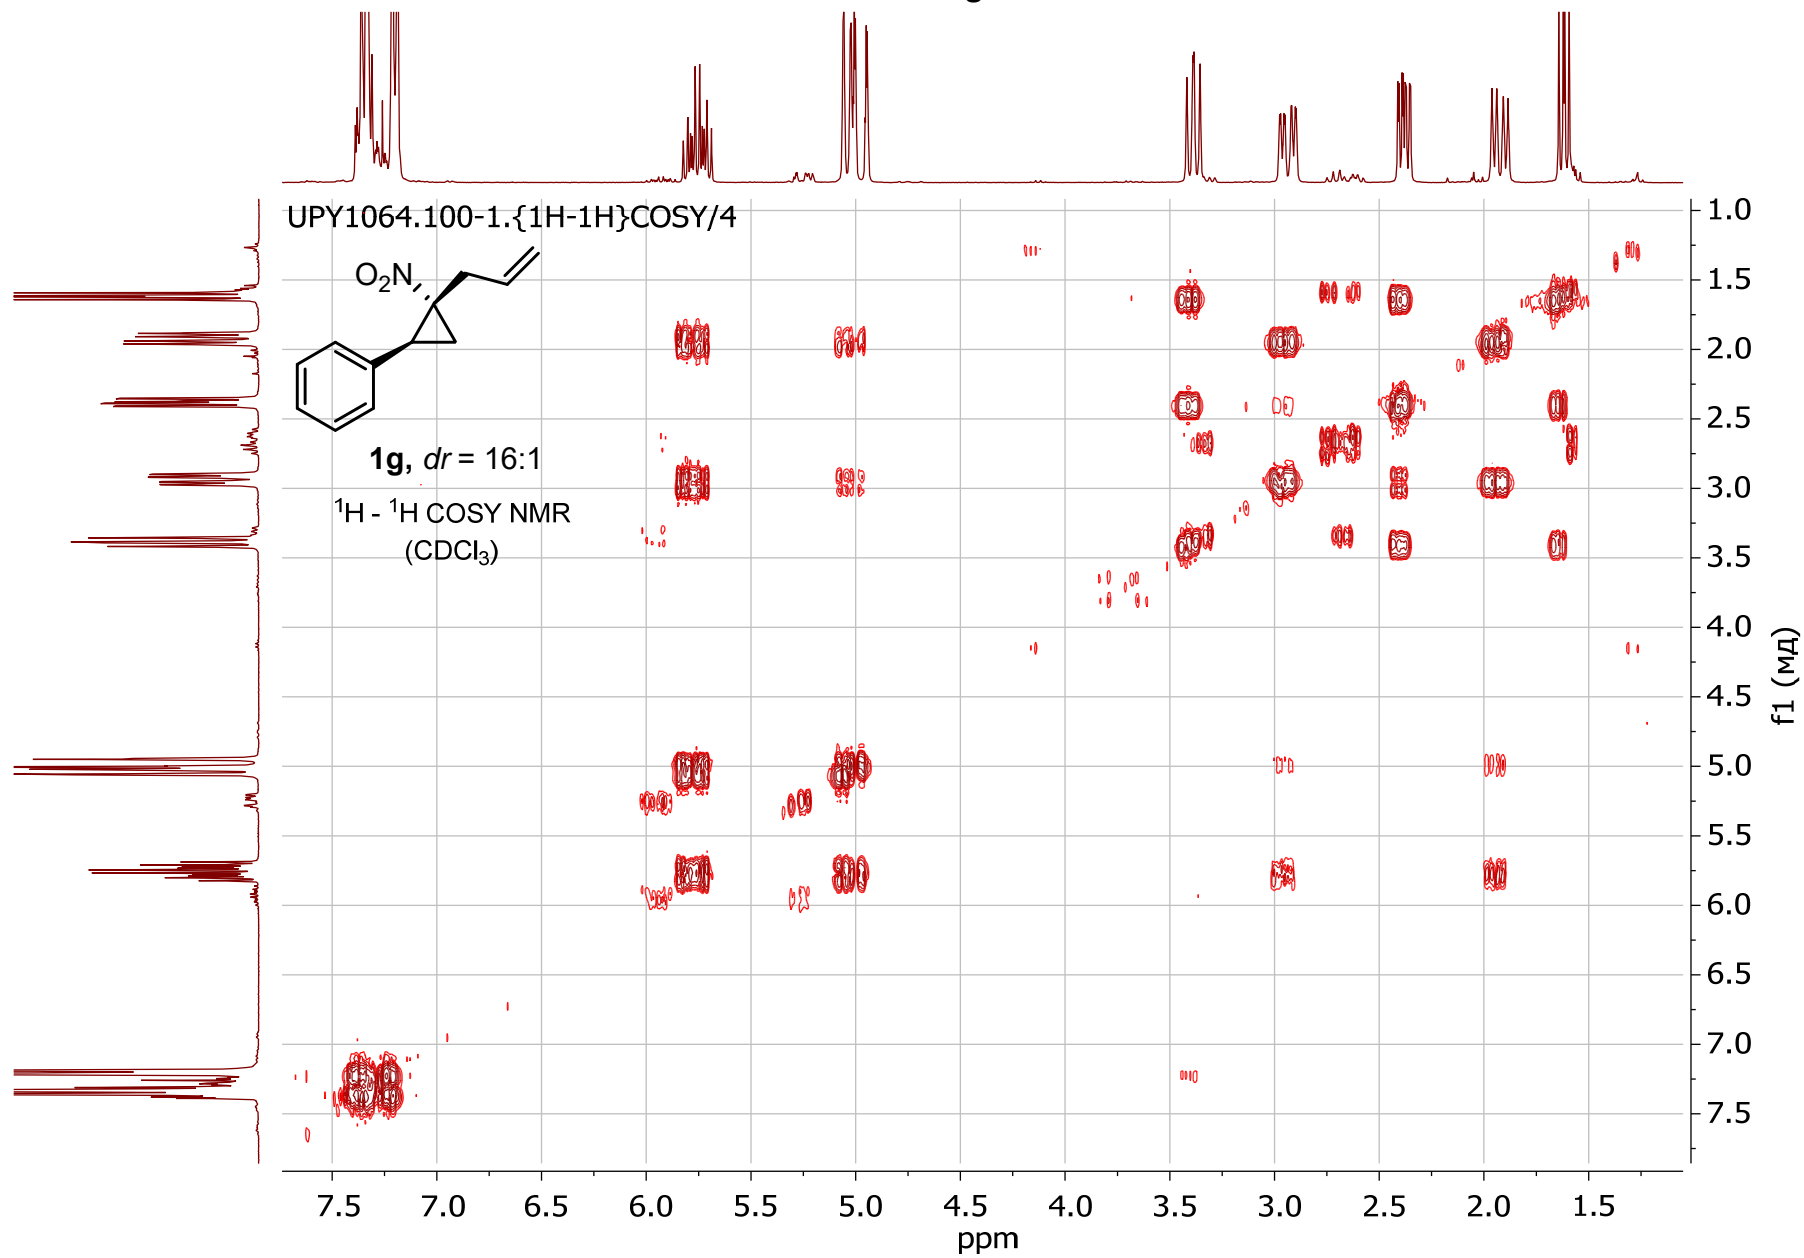

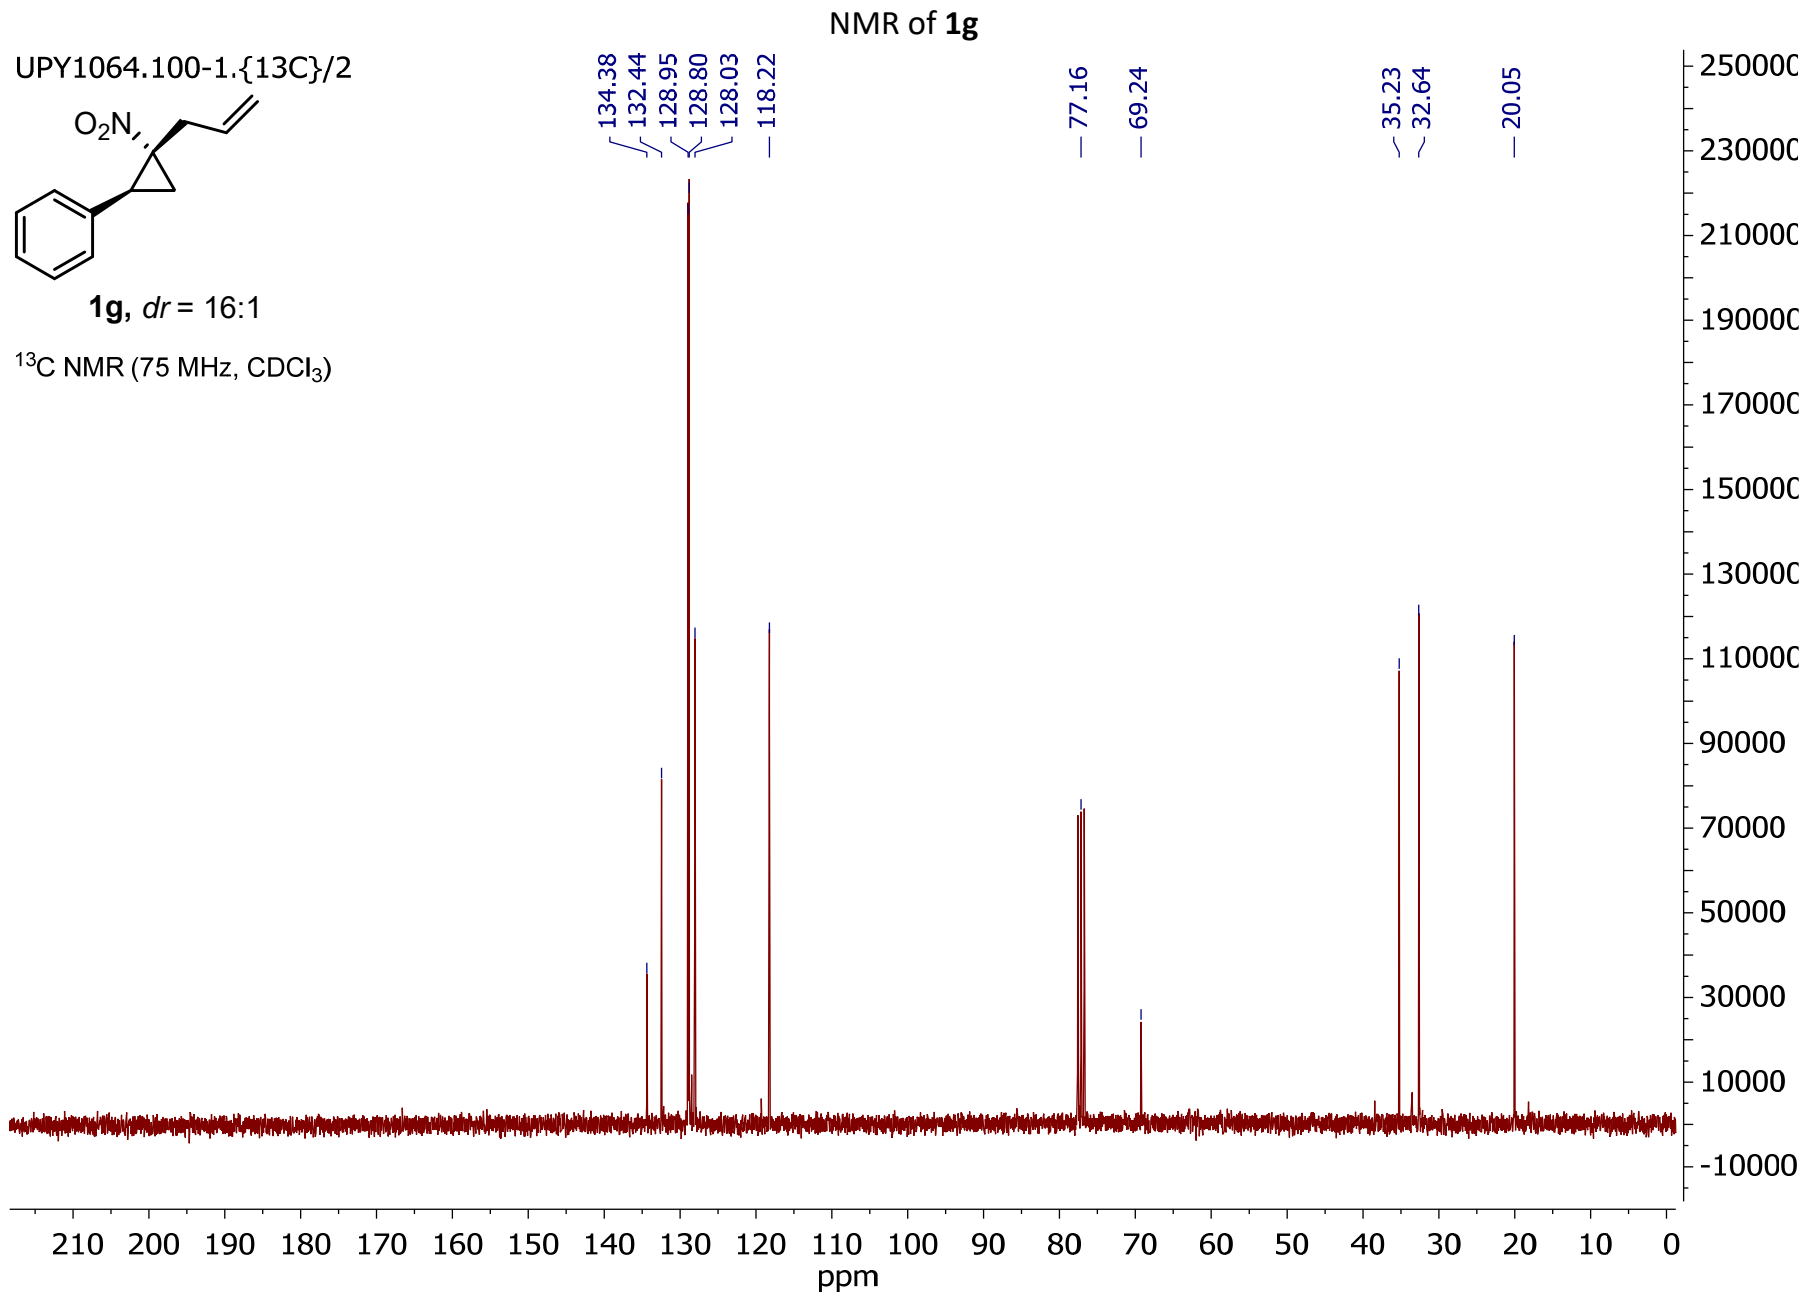



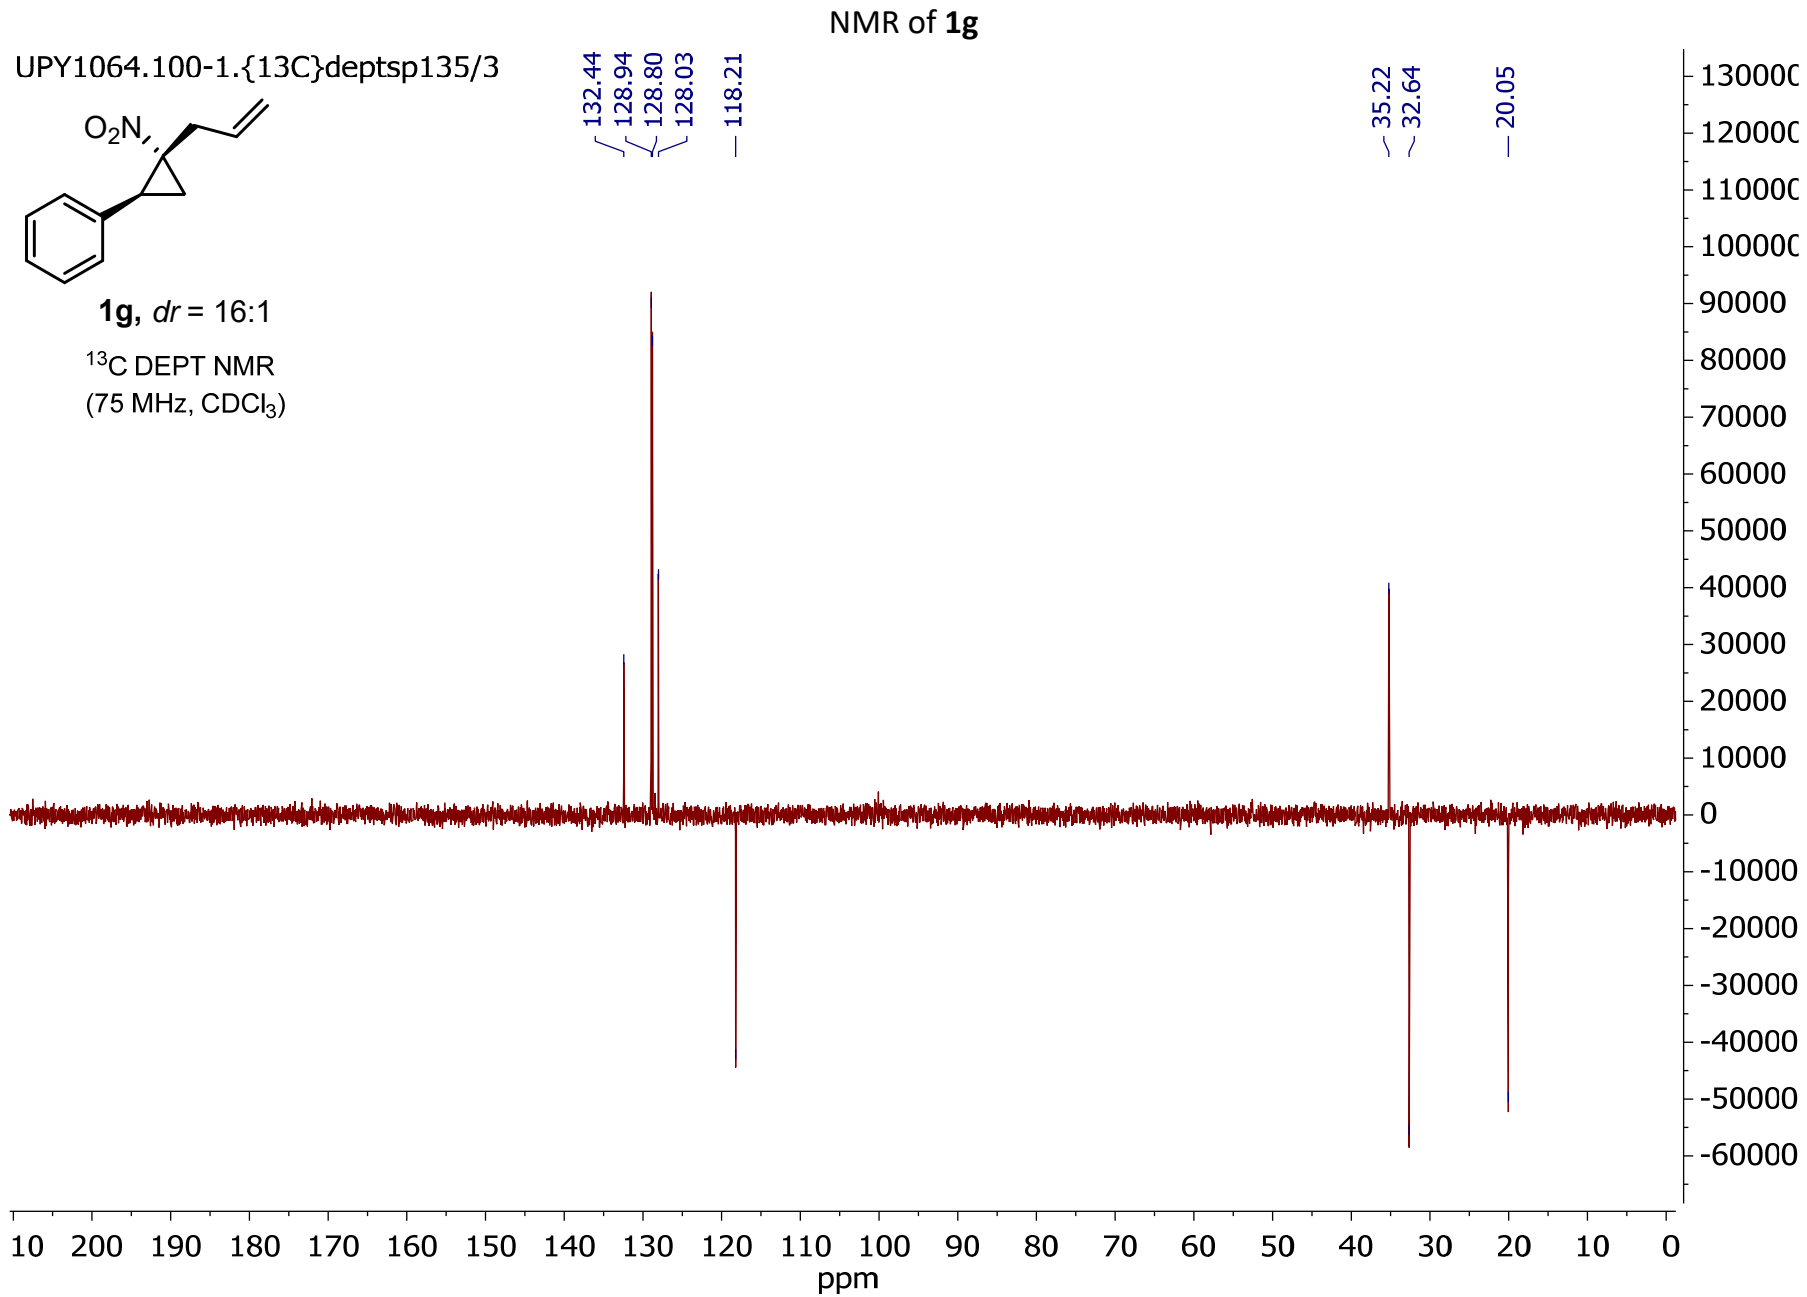

NMR of **1g**

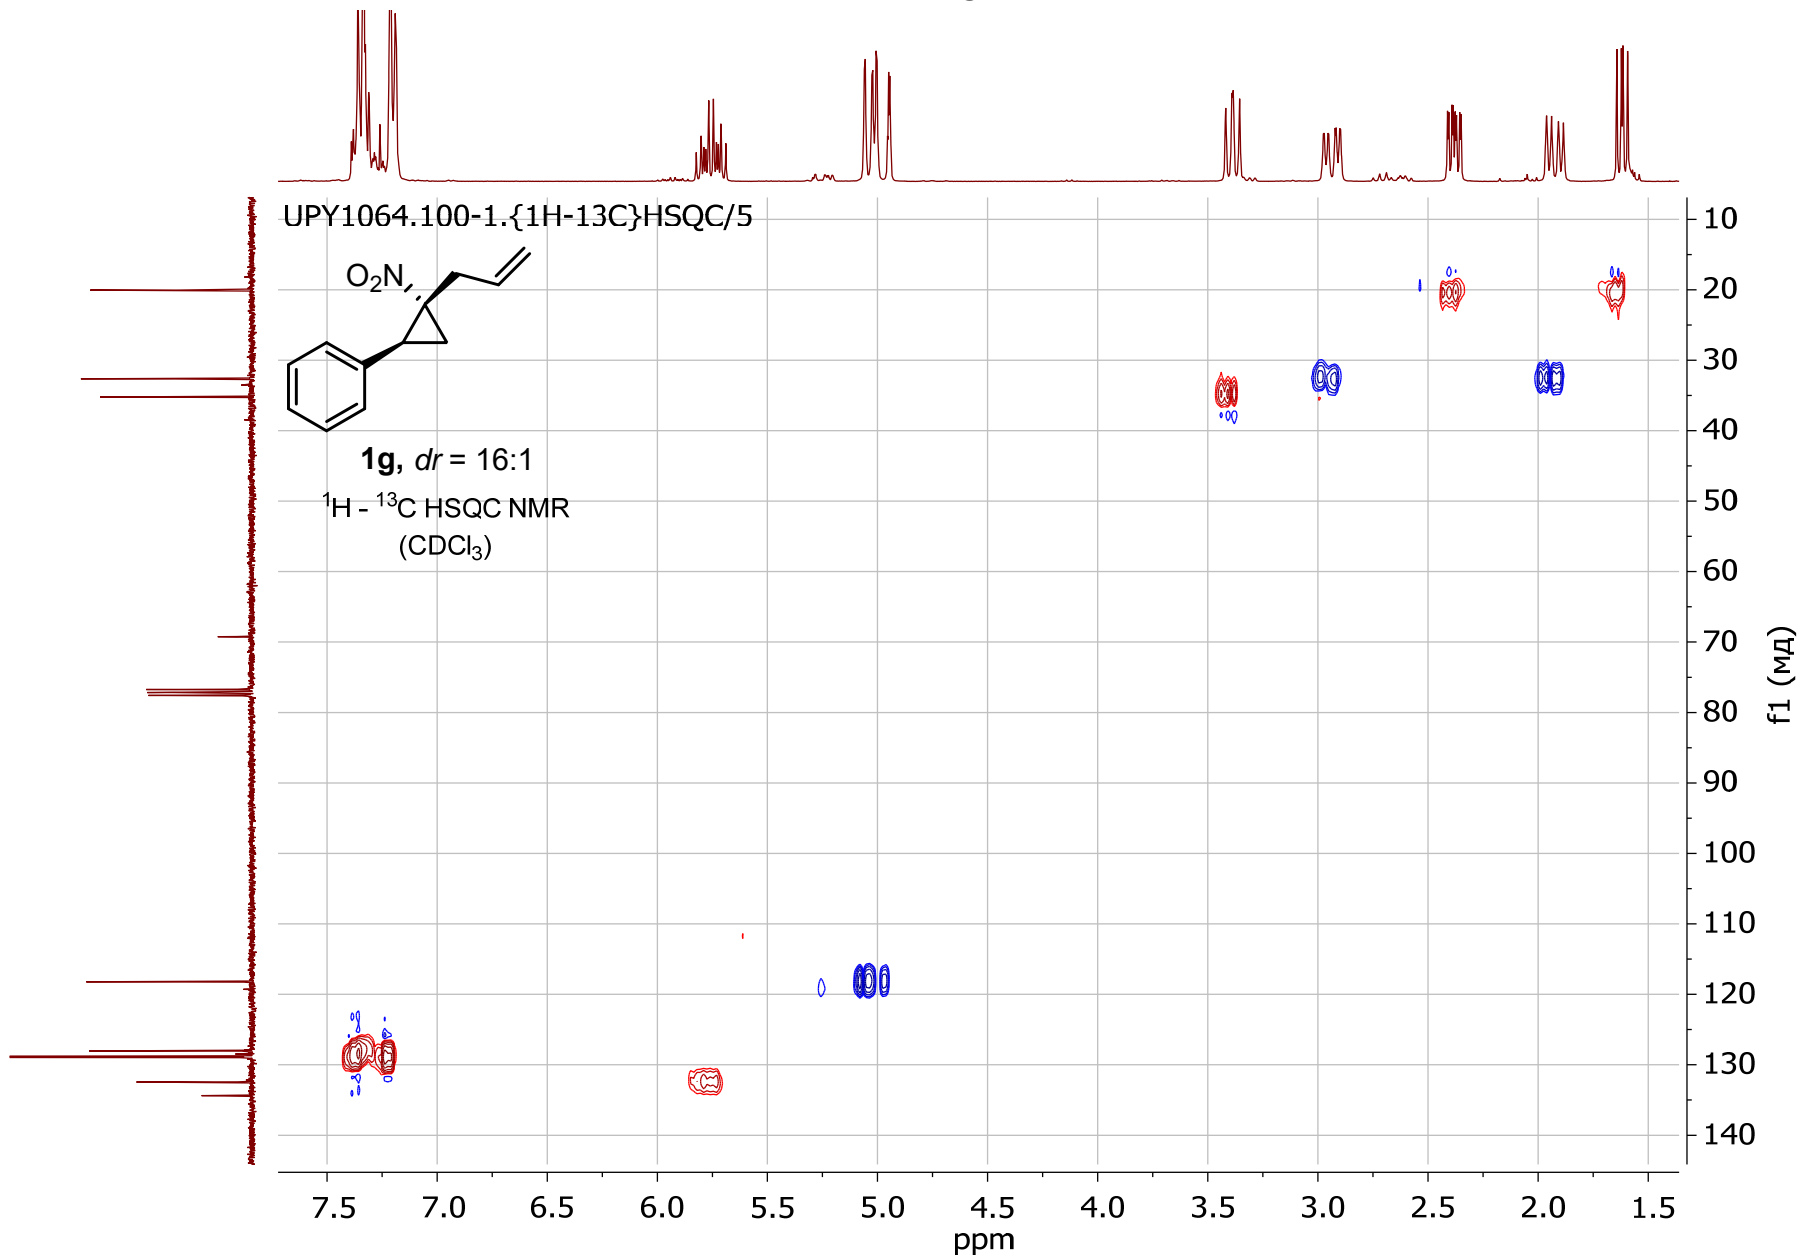

# NMR of **1g**

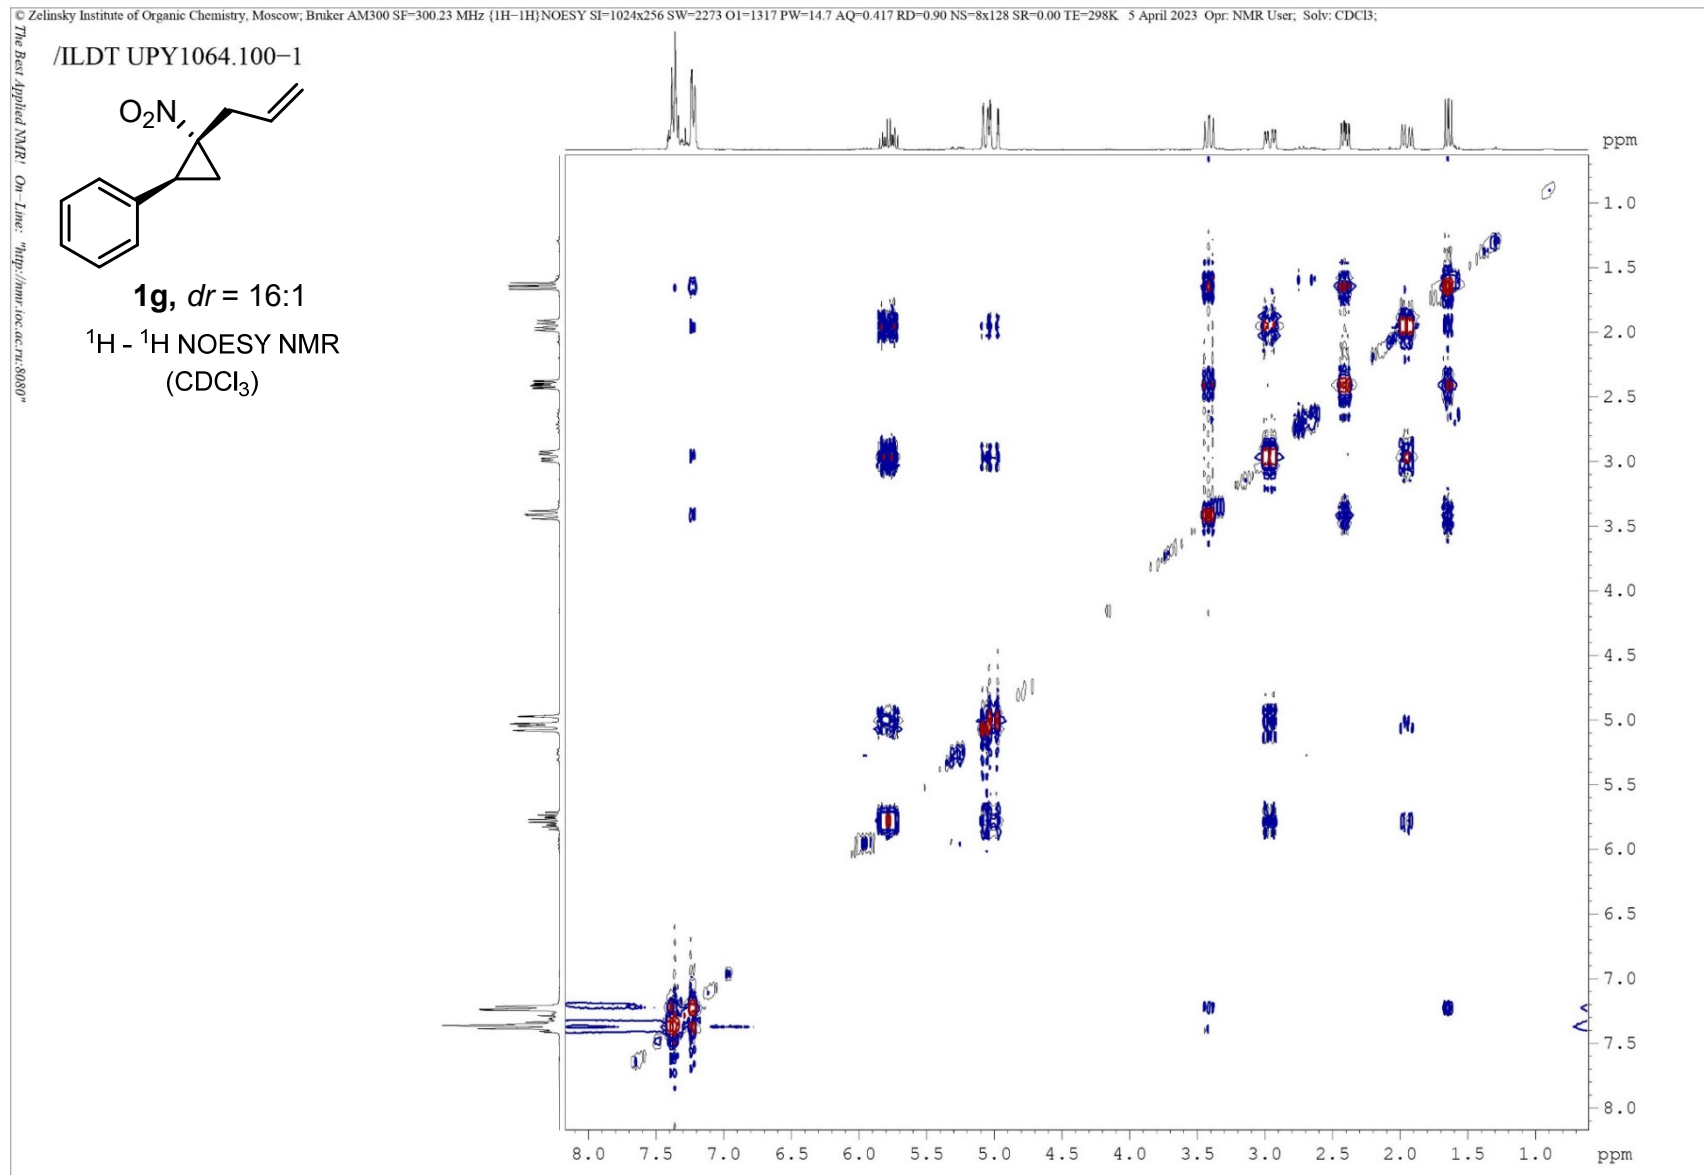

UPY973.101.{1H}/1

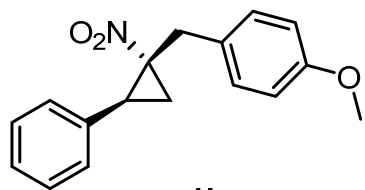

**1h**

<sup>1</sup>H NMR (300 MHz, CDCl<sub>3</sub>)

NMR of **1h**

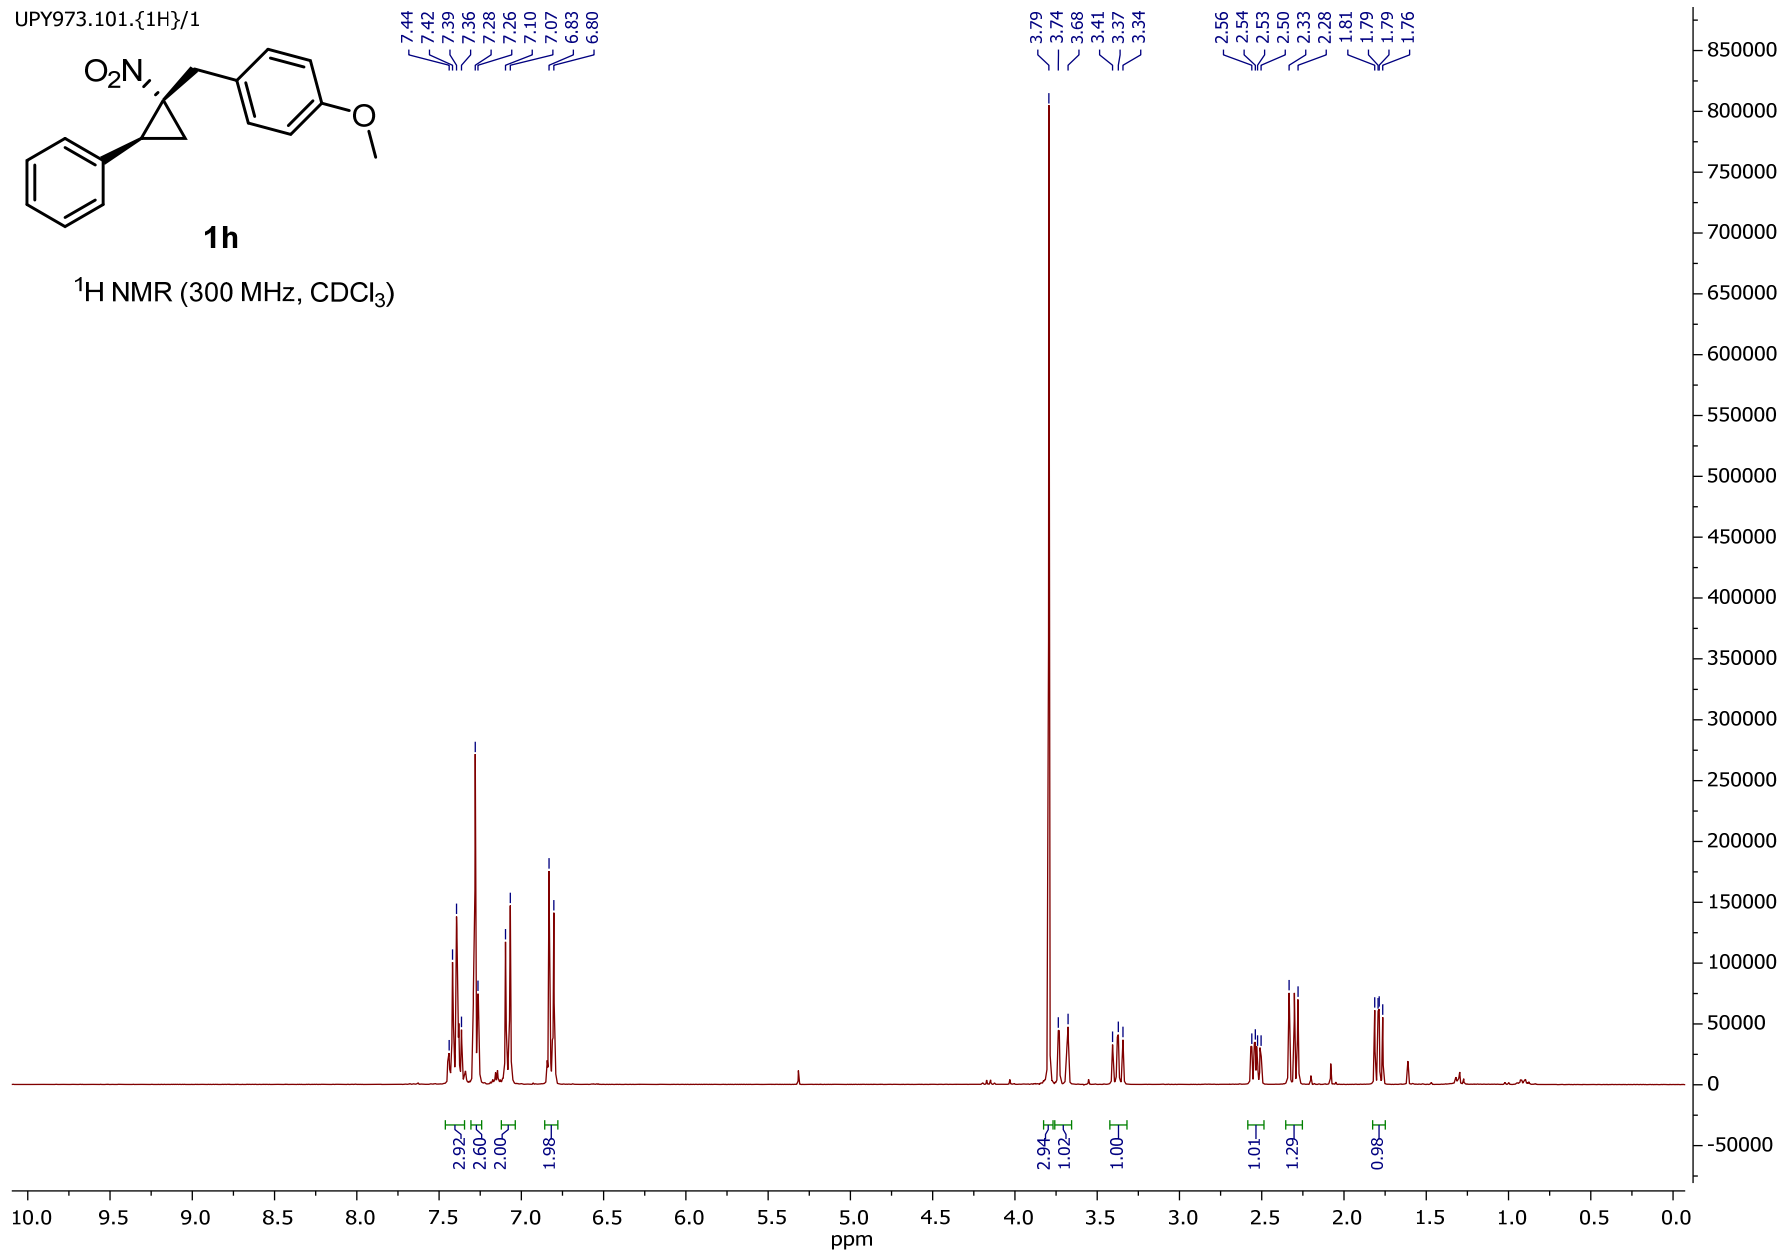

NMR of **1h**

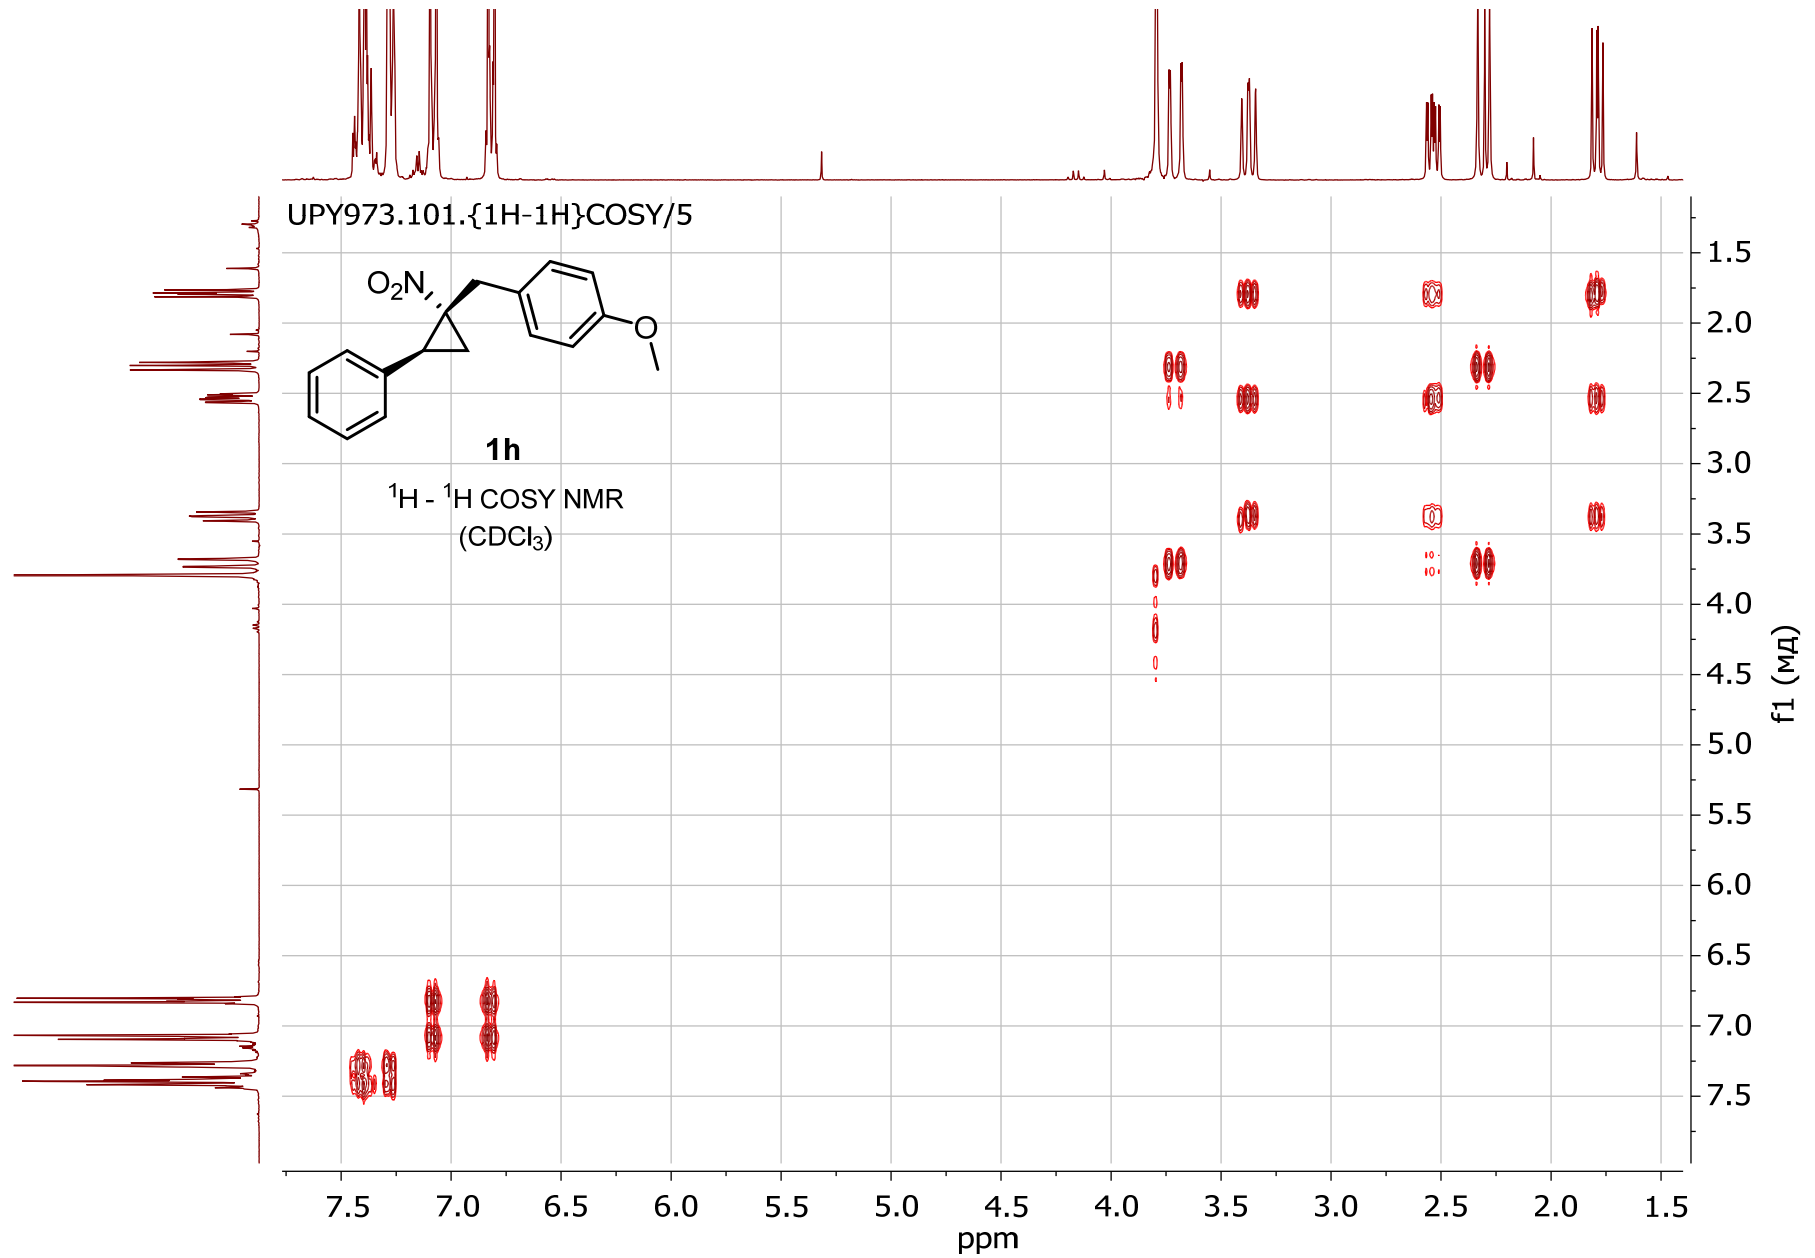

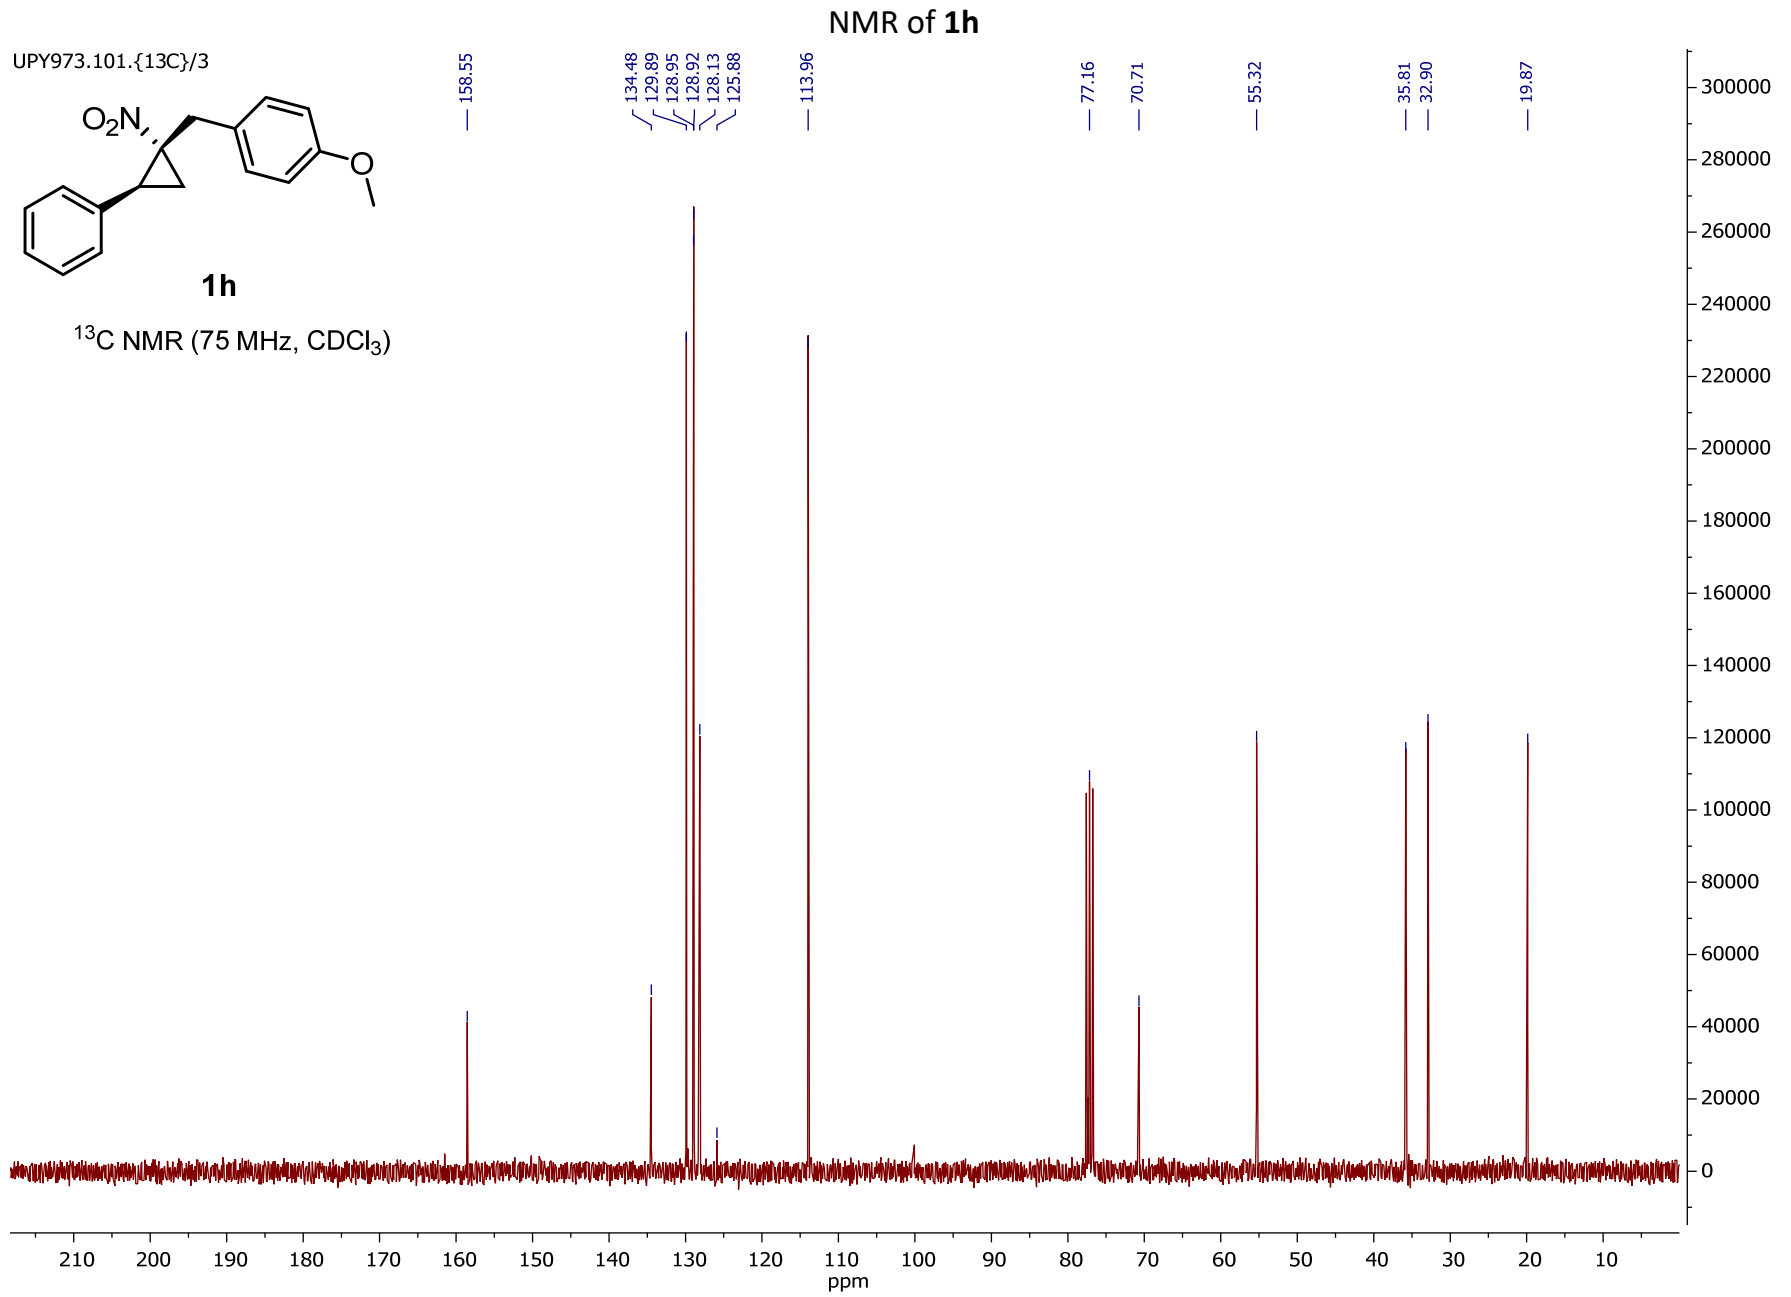

# NMR of **1h**

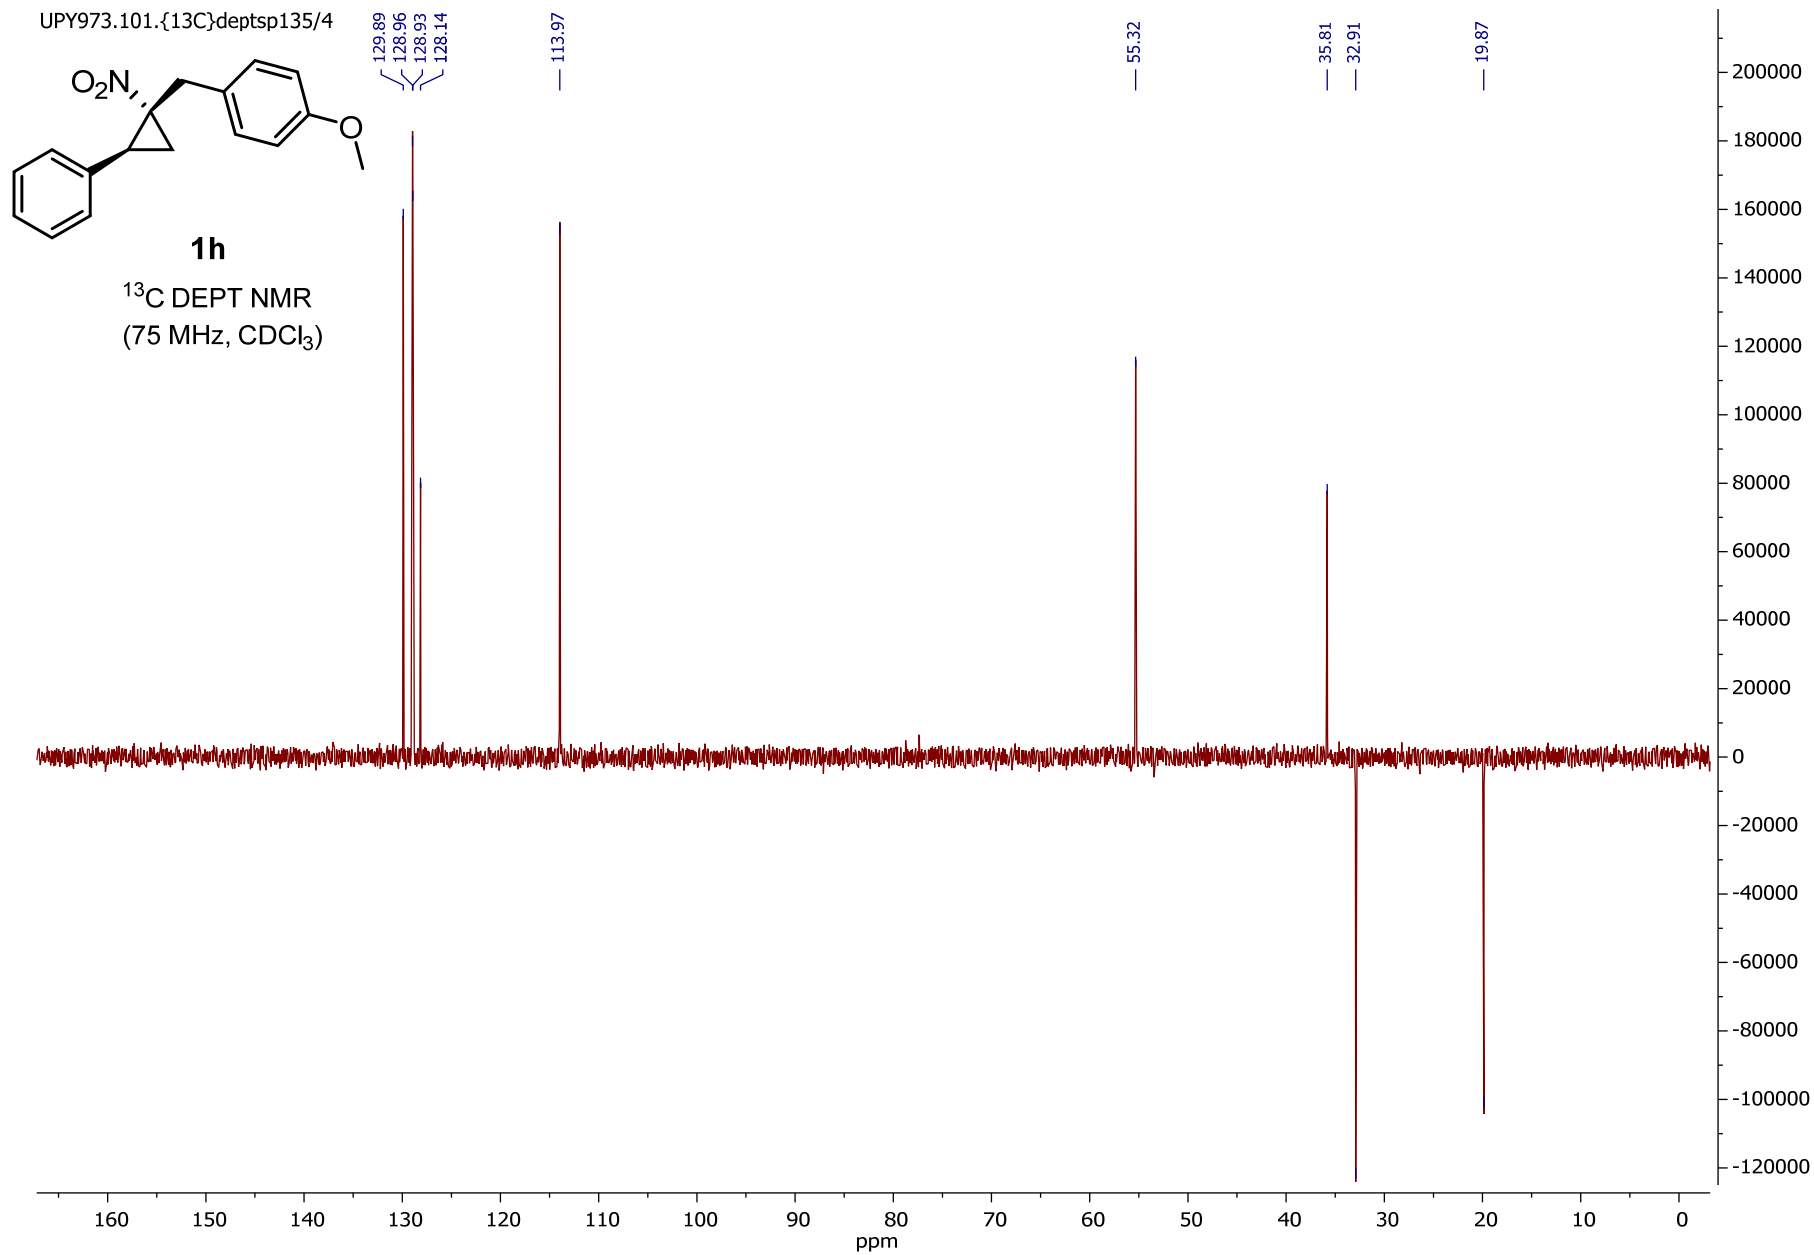

NMR of **1h**

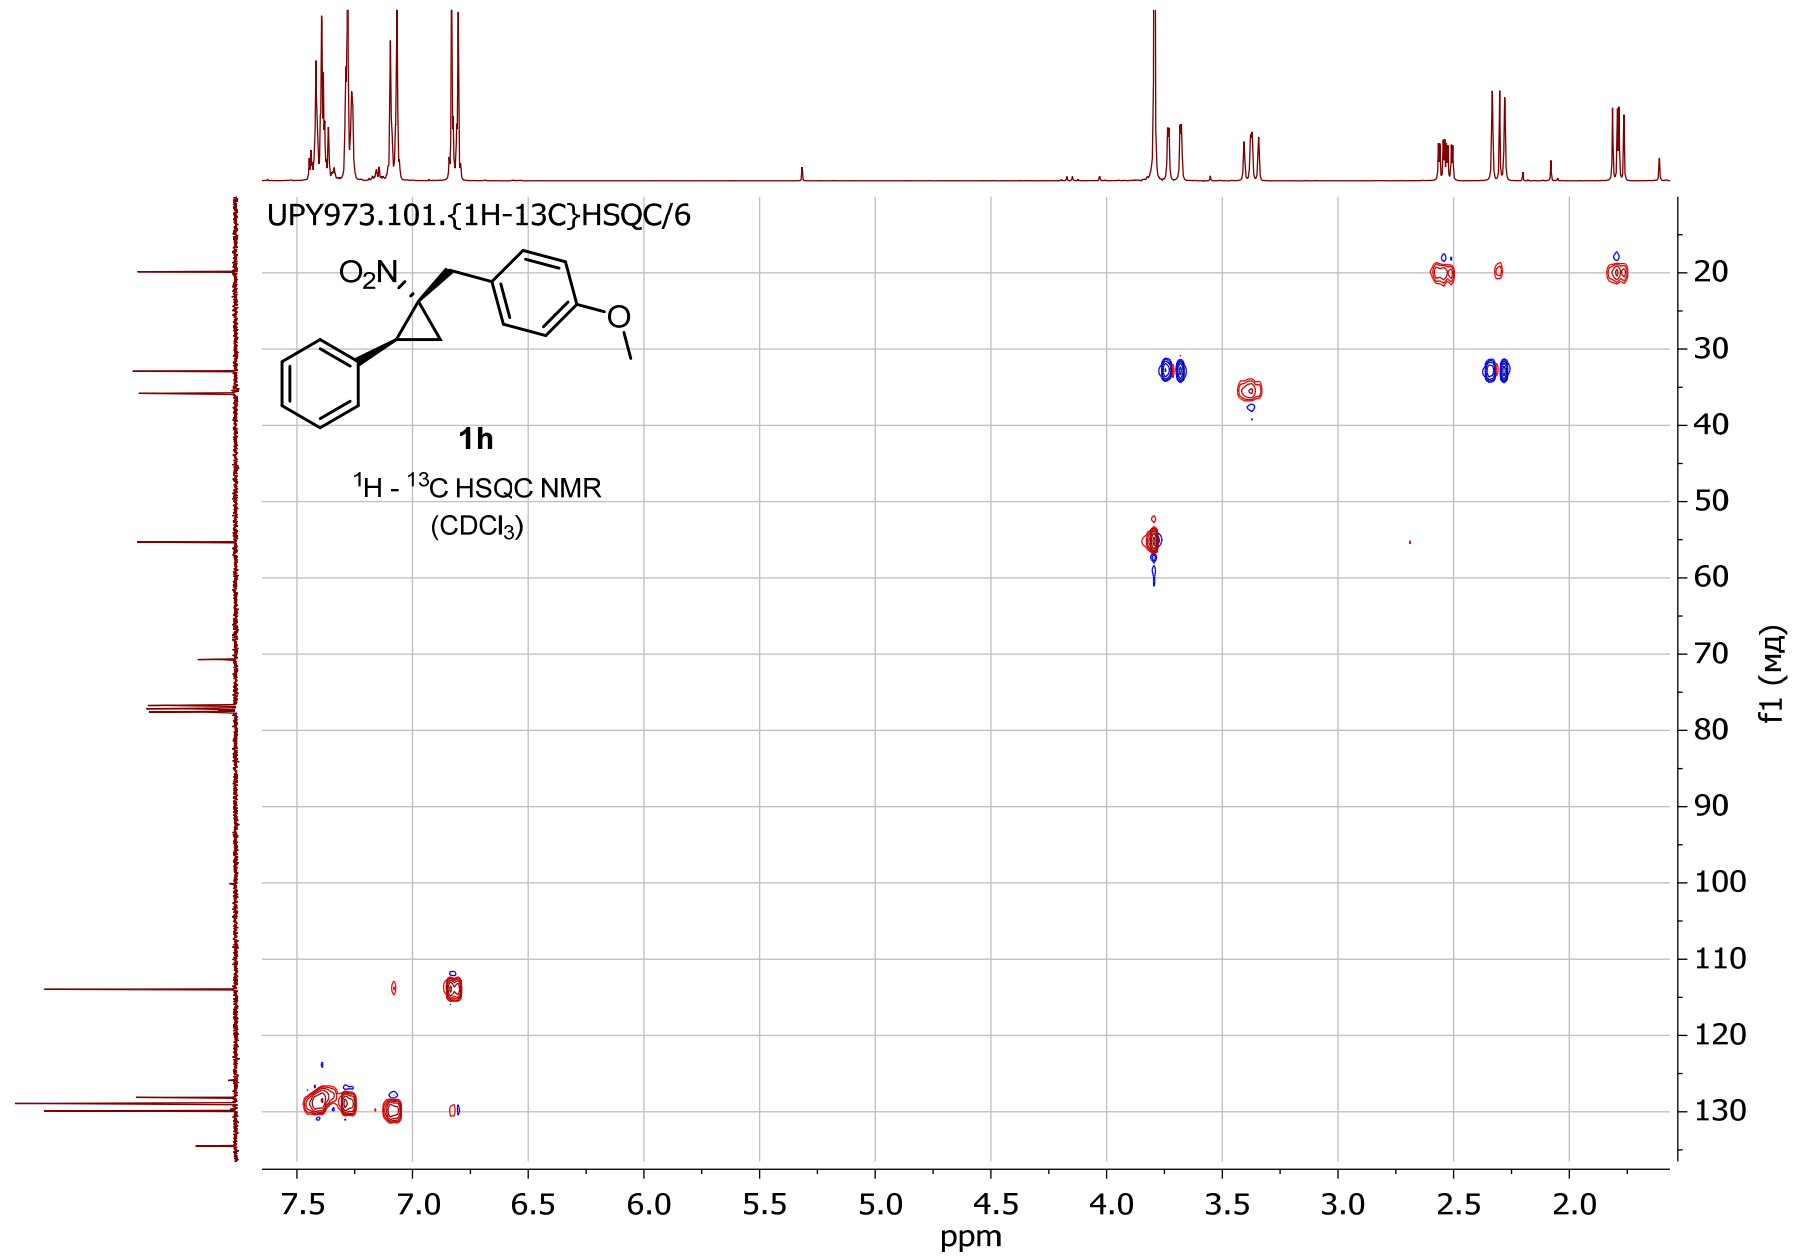



# NMR of **1h**

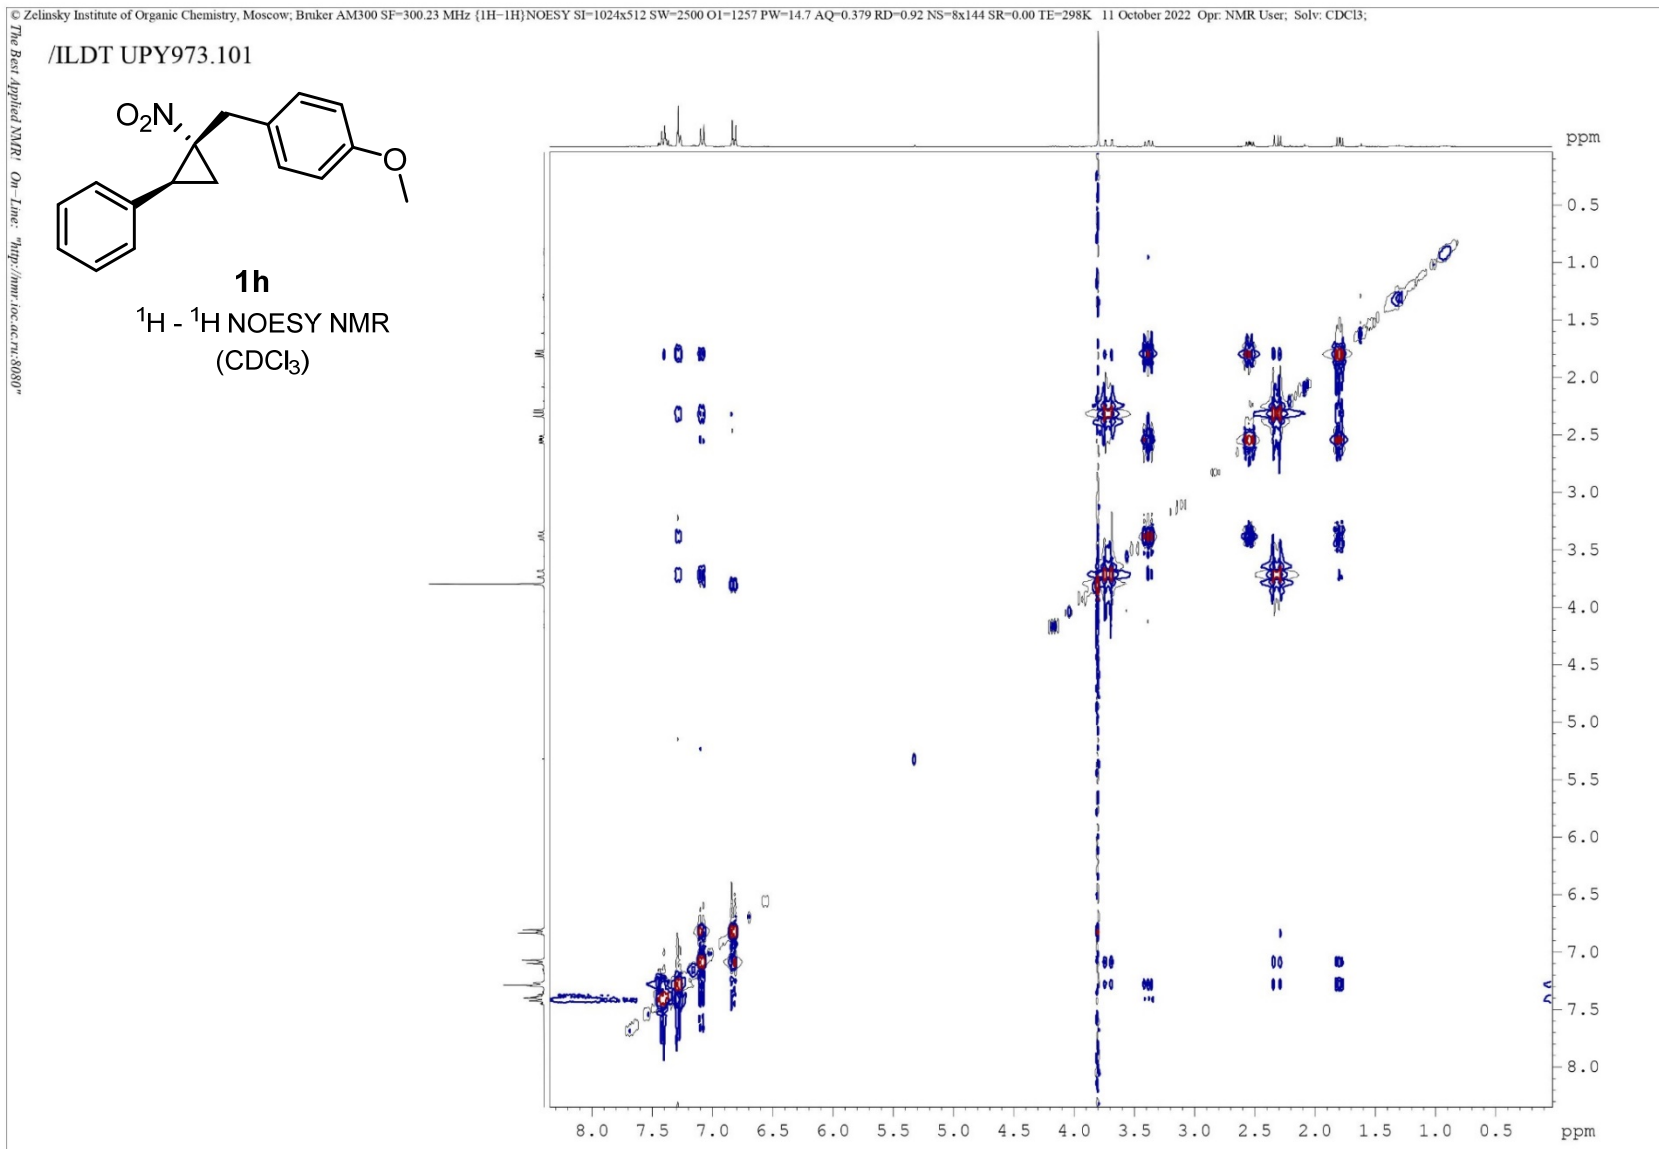

# FTIR (ATR) of 1h

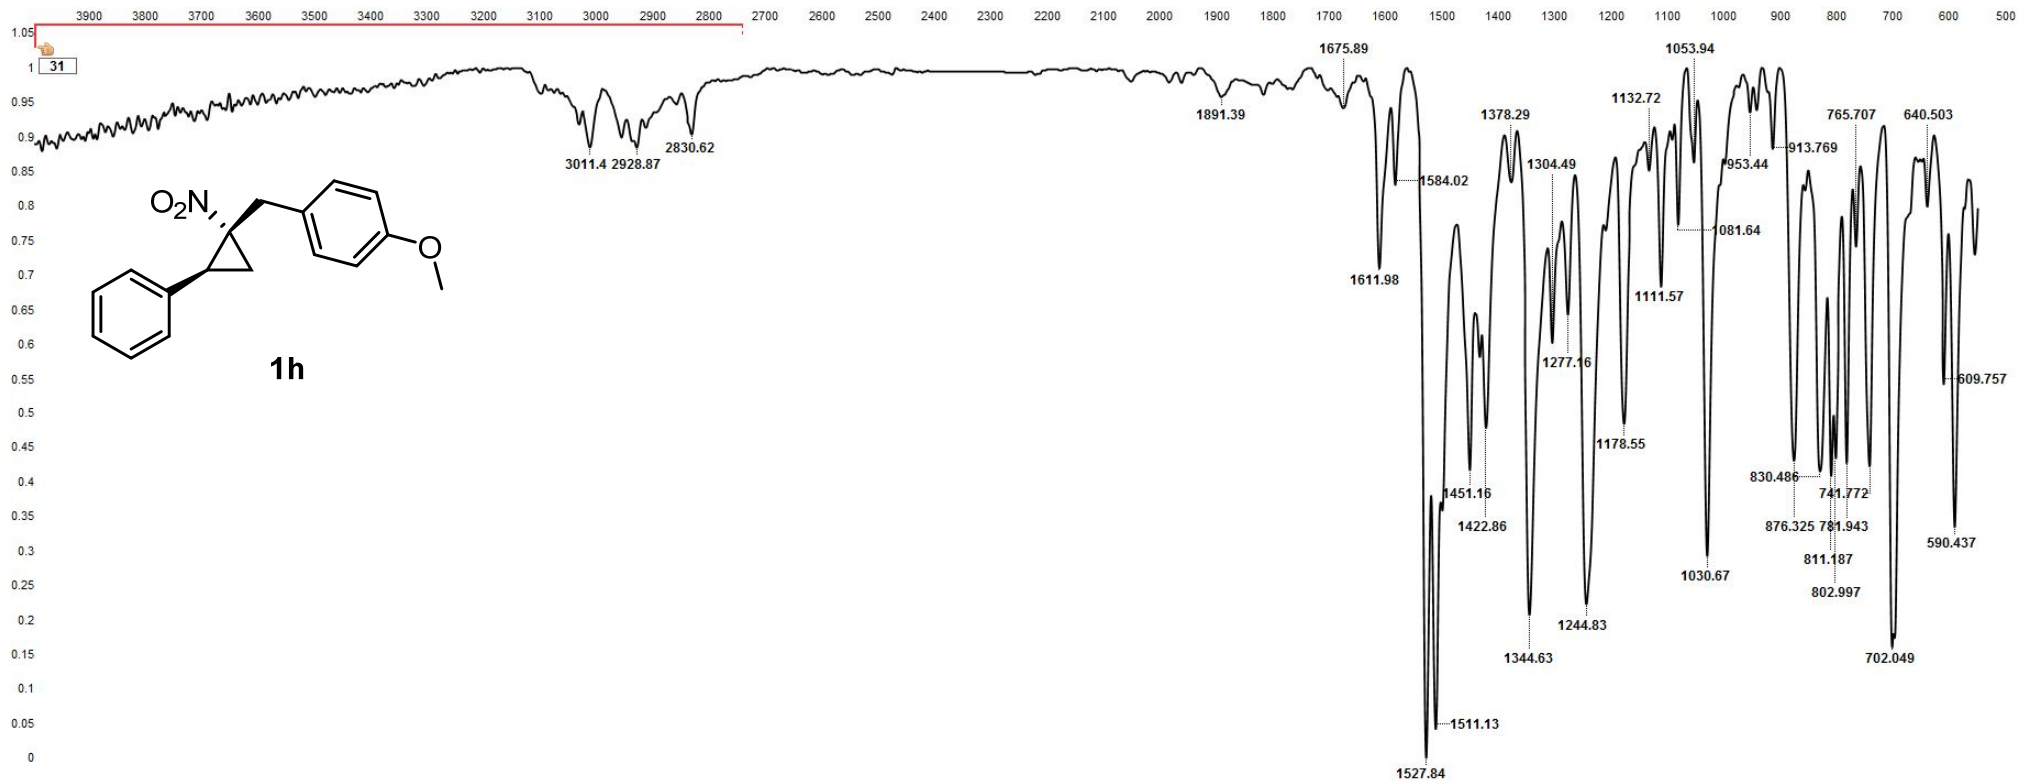

UPY1020.102.{1H}/1

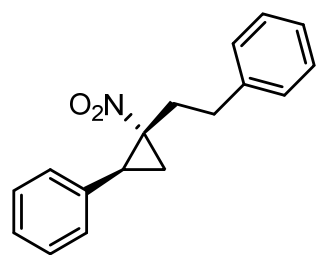

**1i**, *dr* = 17:1

<sup>1</sup>H NMR (300 MHz, CDCl<sub>3</sub>)

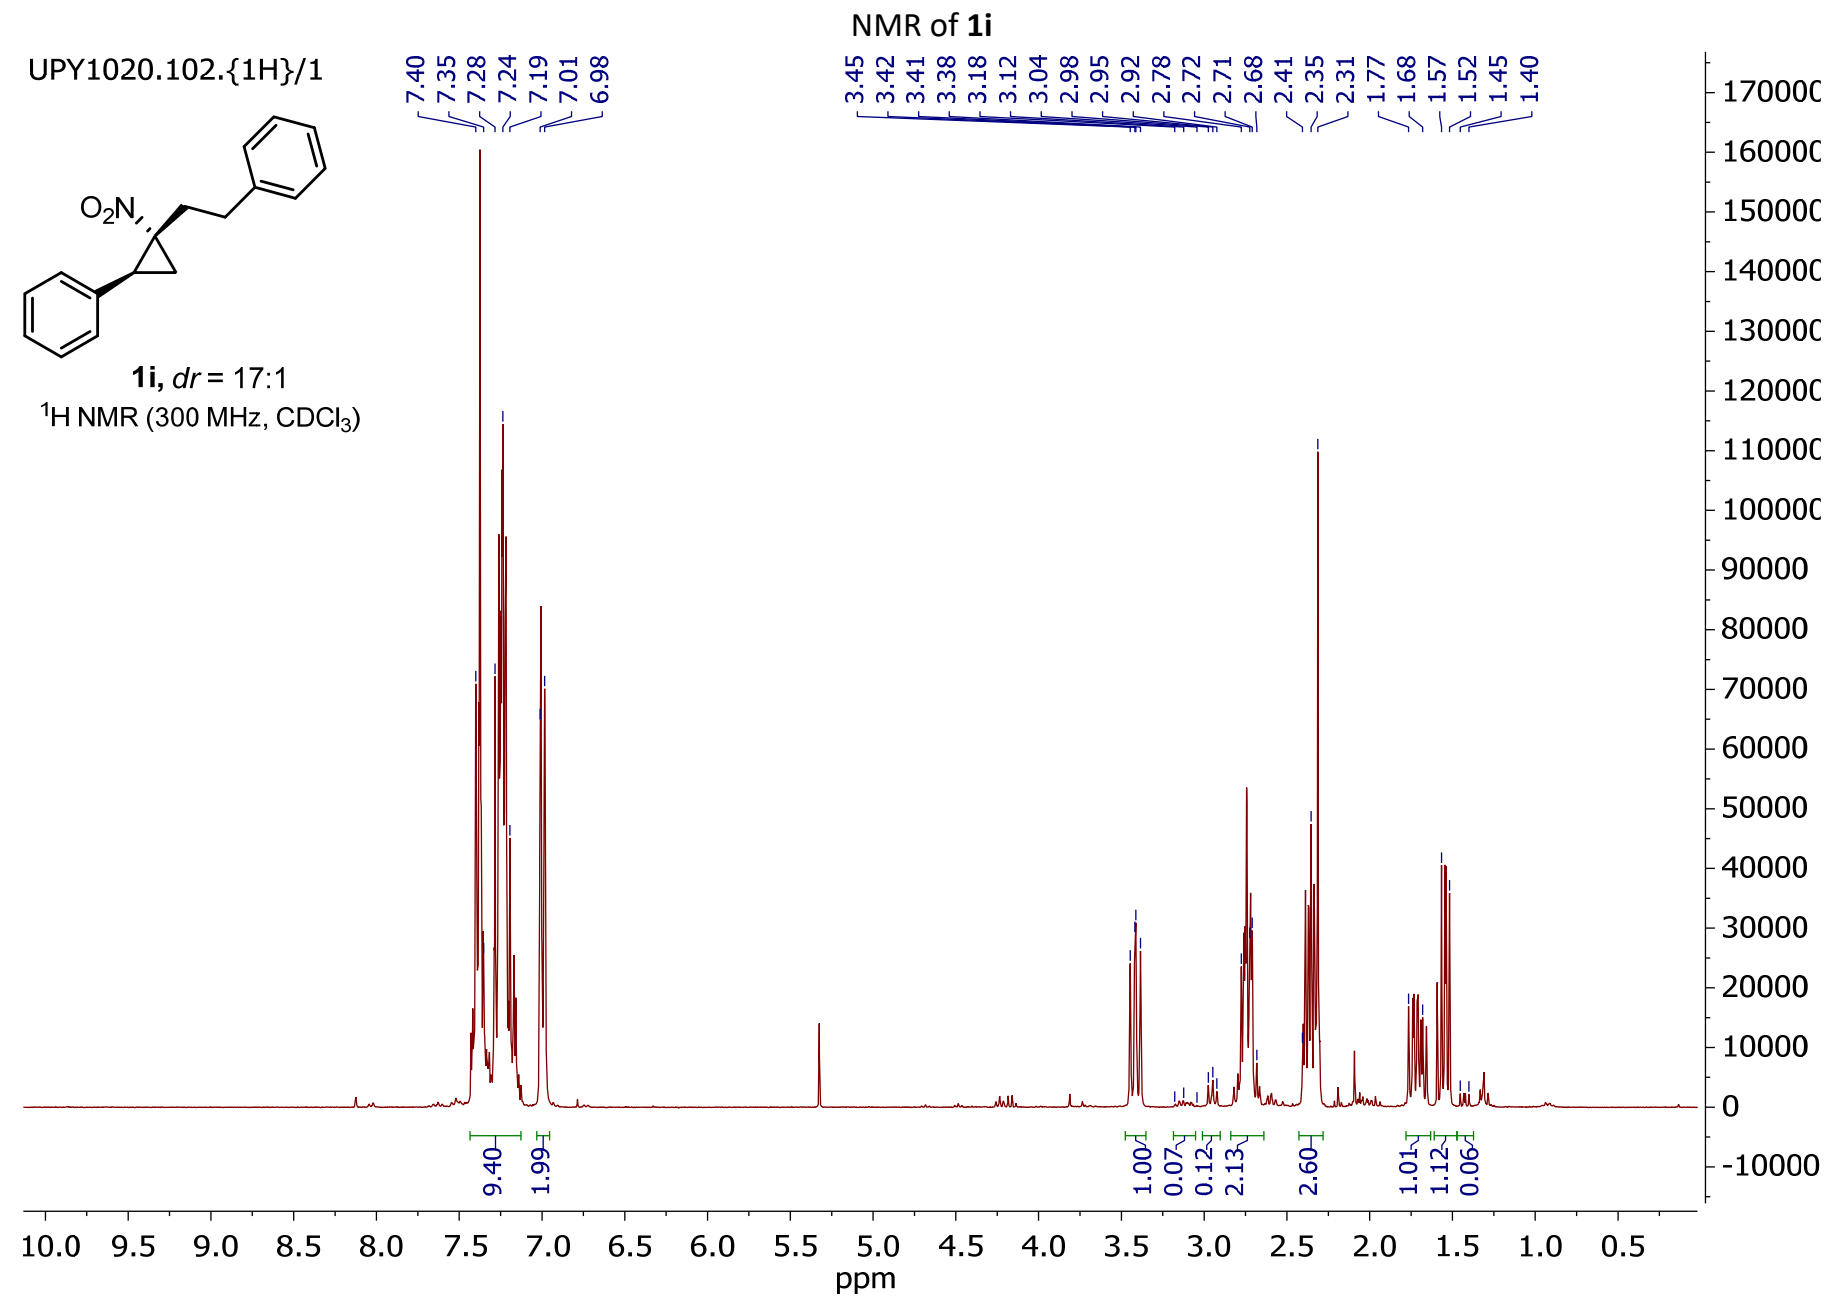

NMR of **1i**

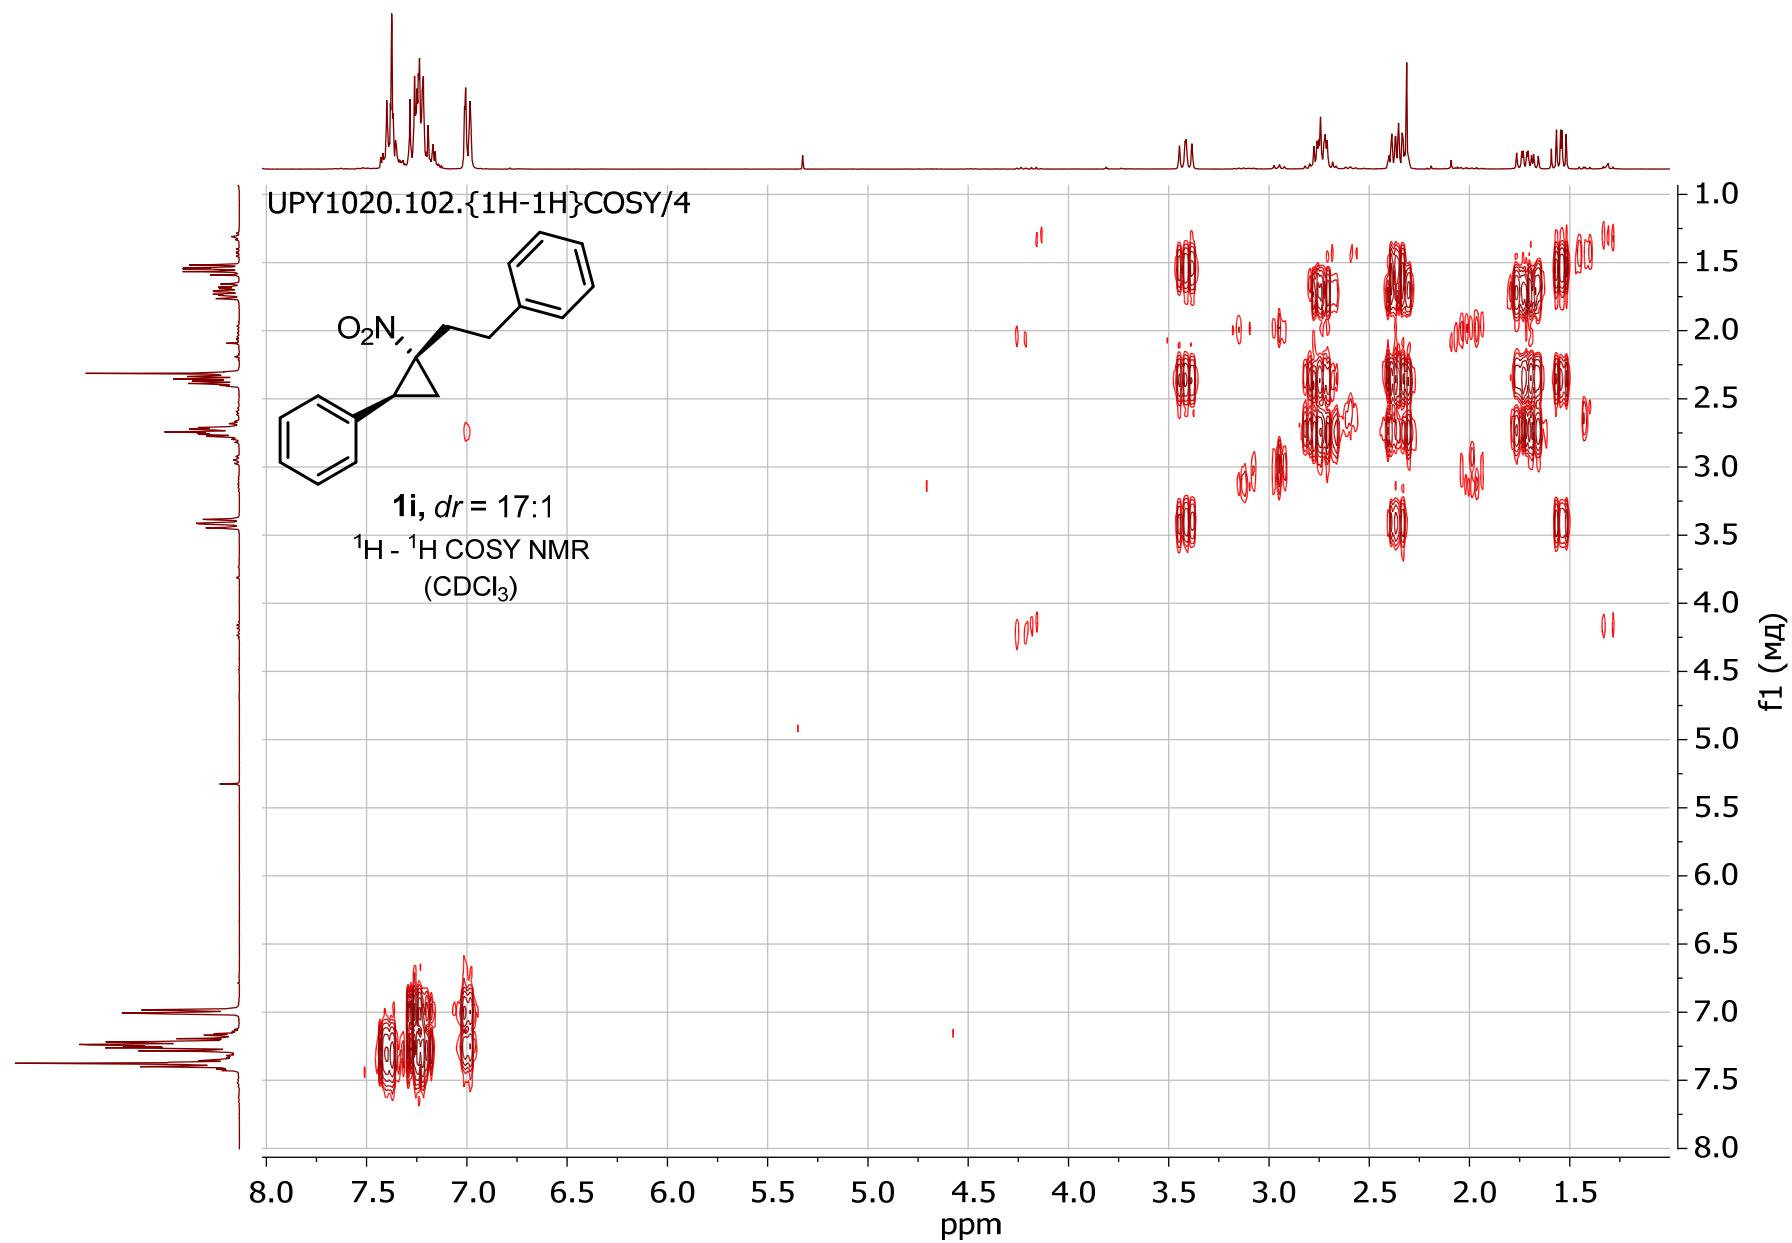

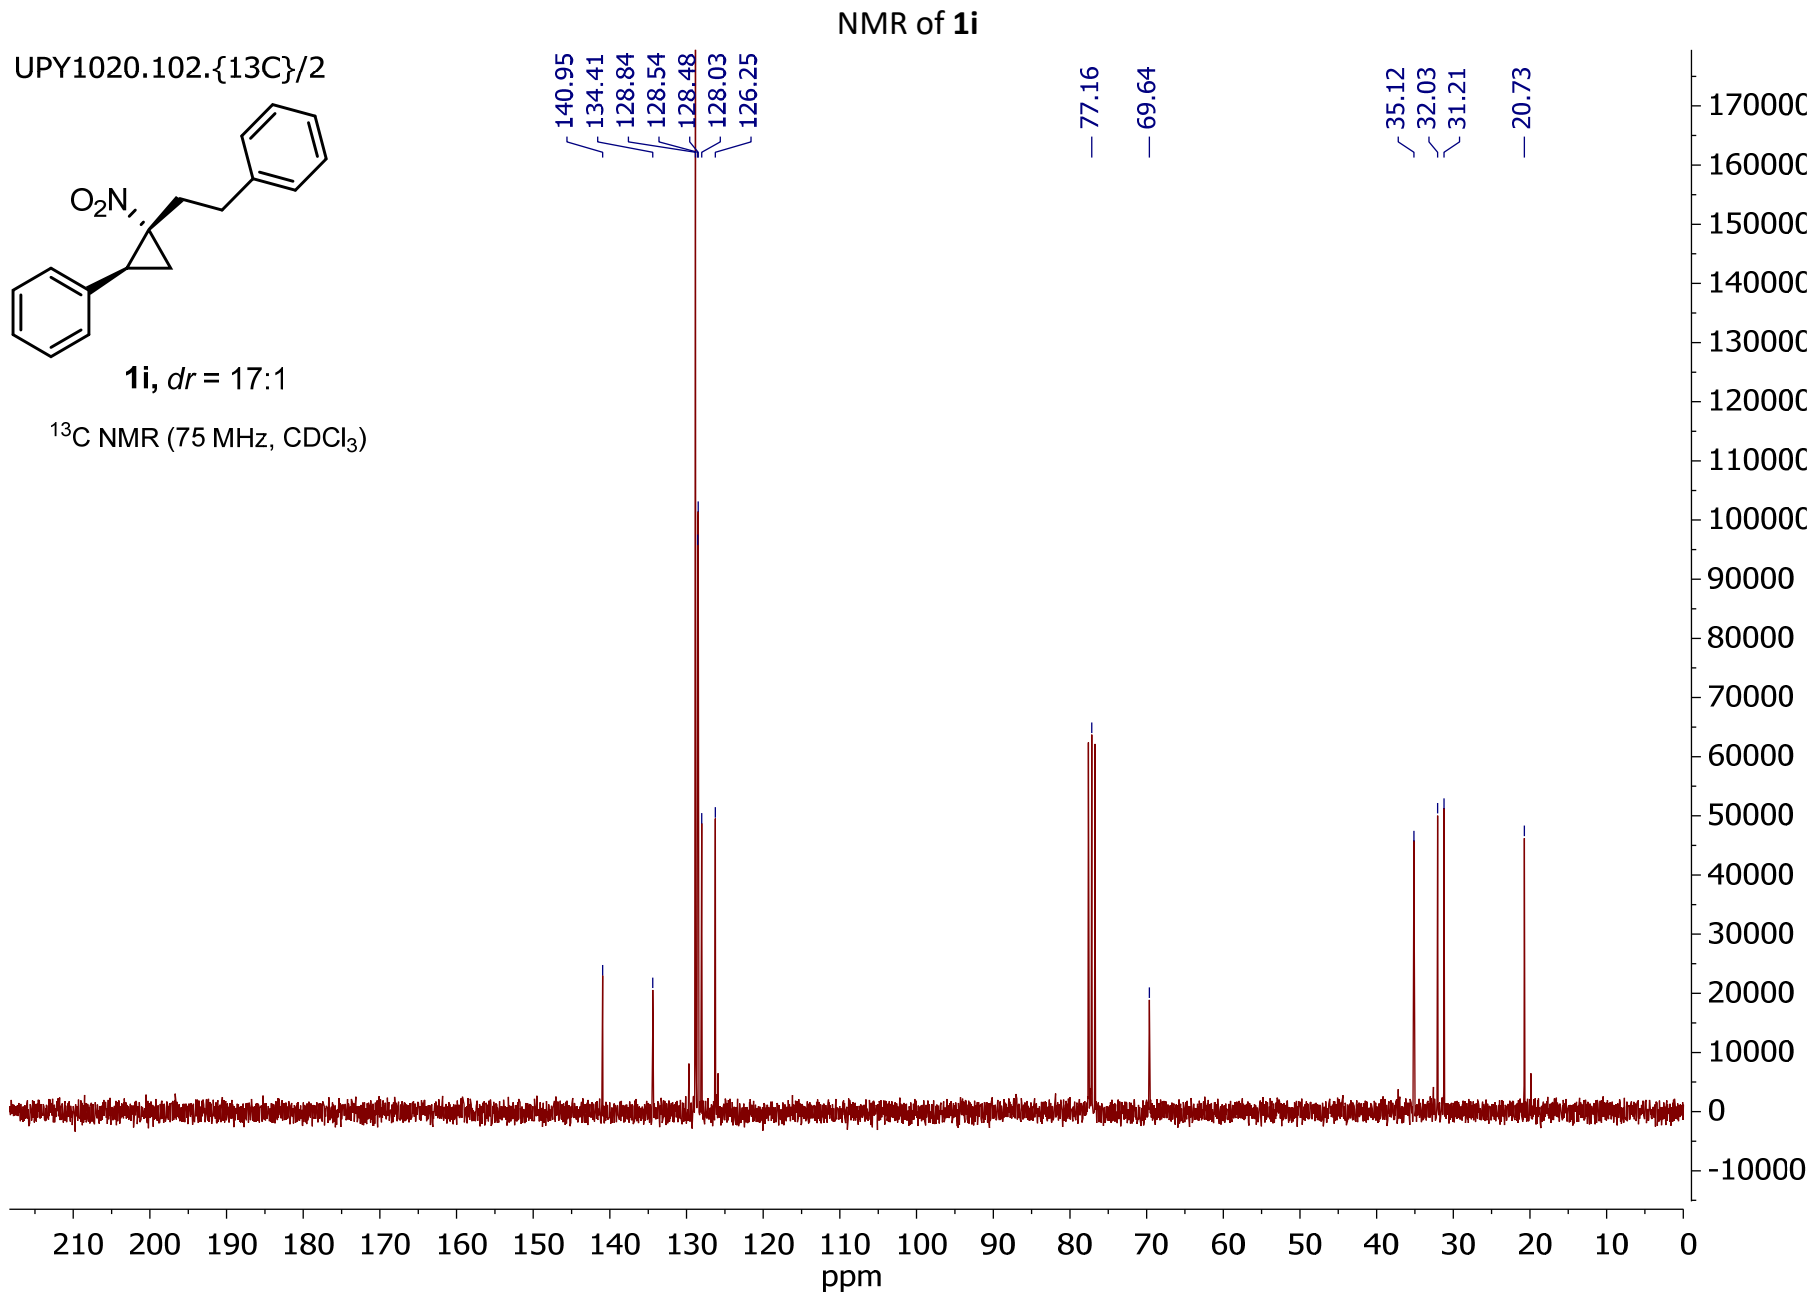

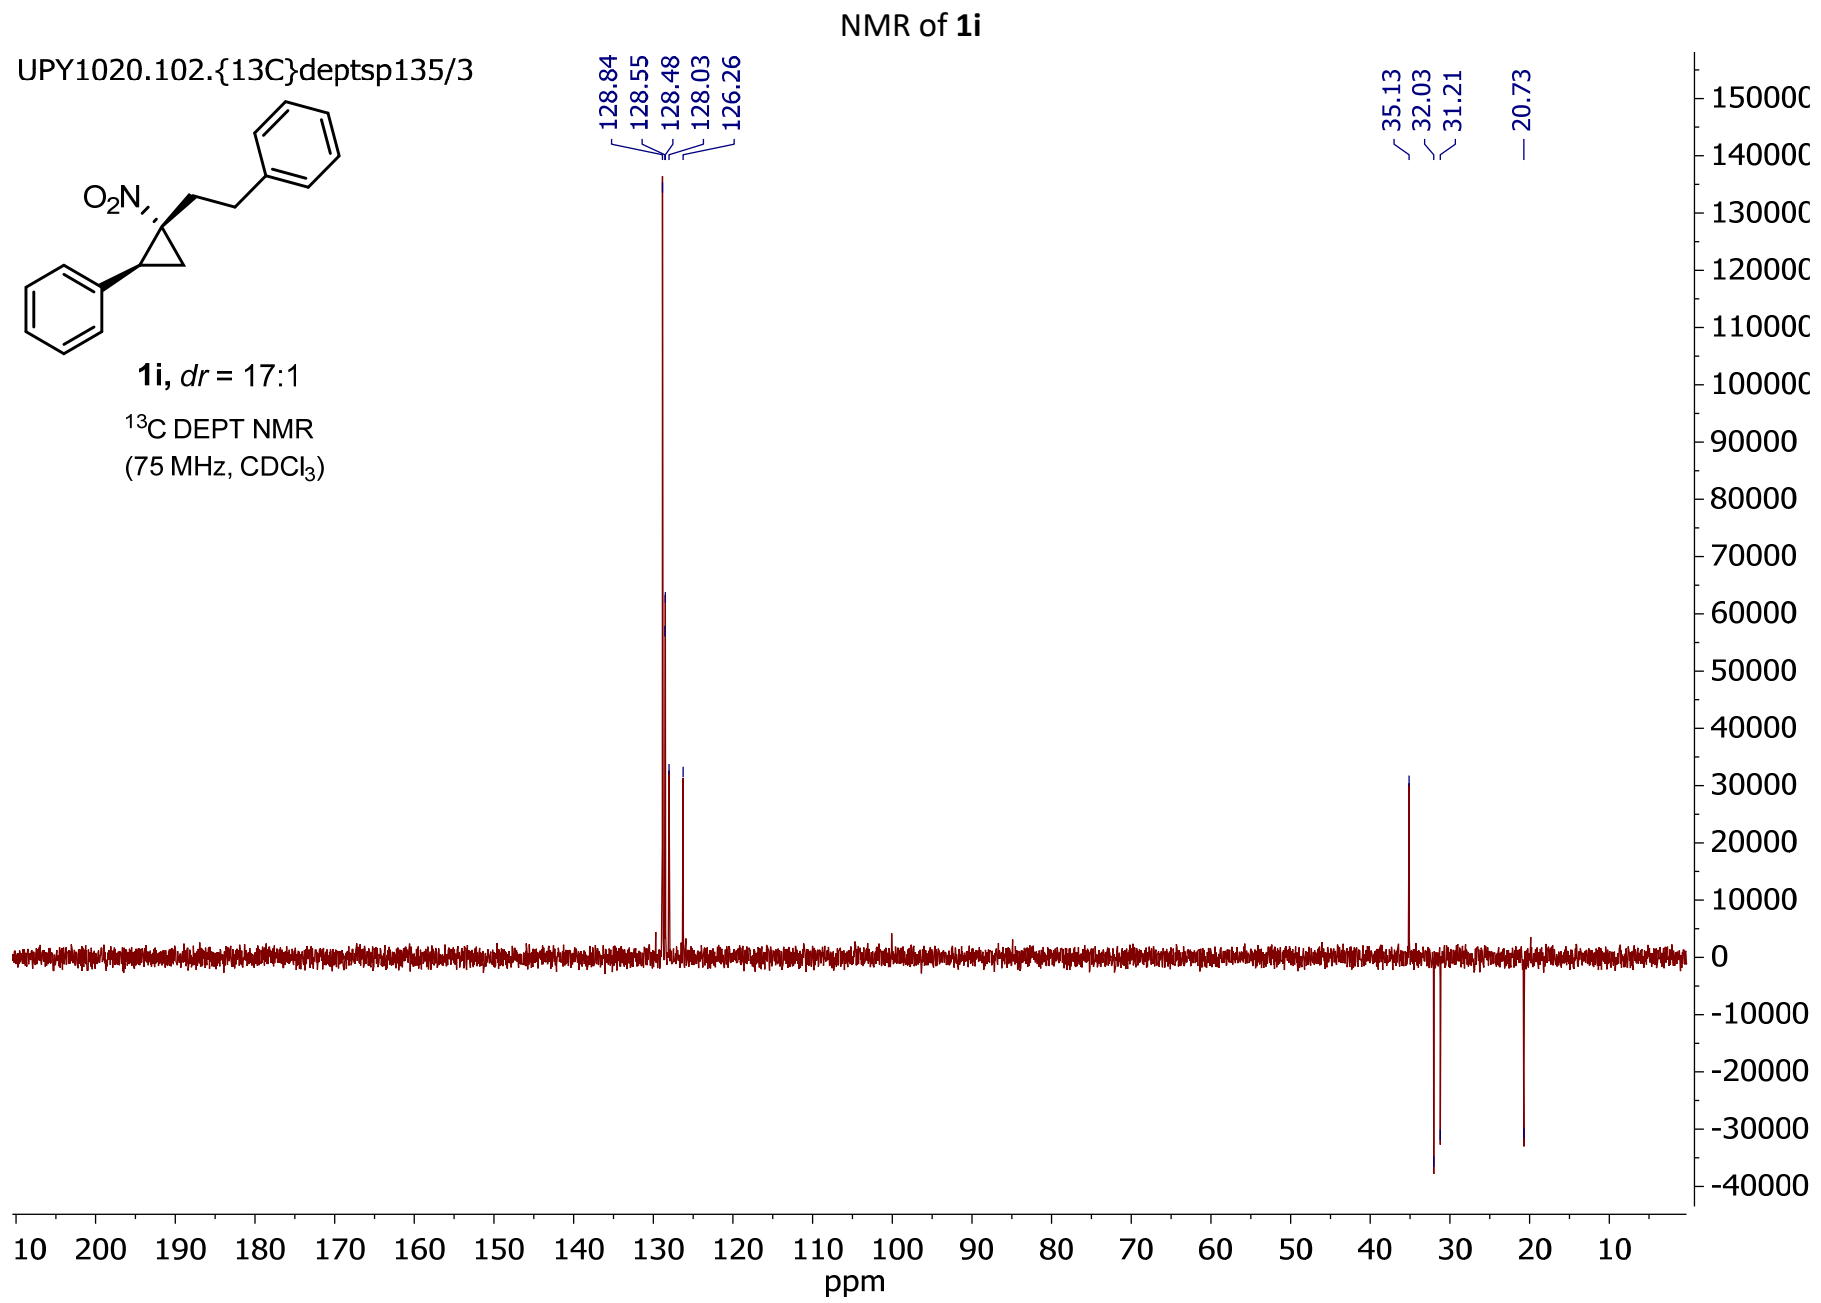

NMR of **1i**

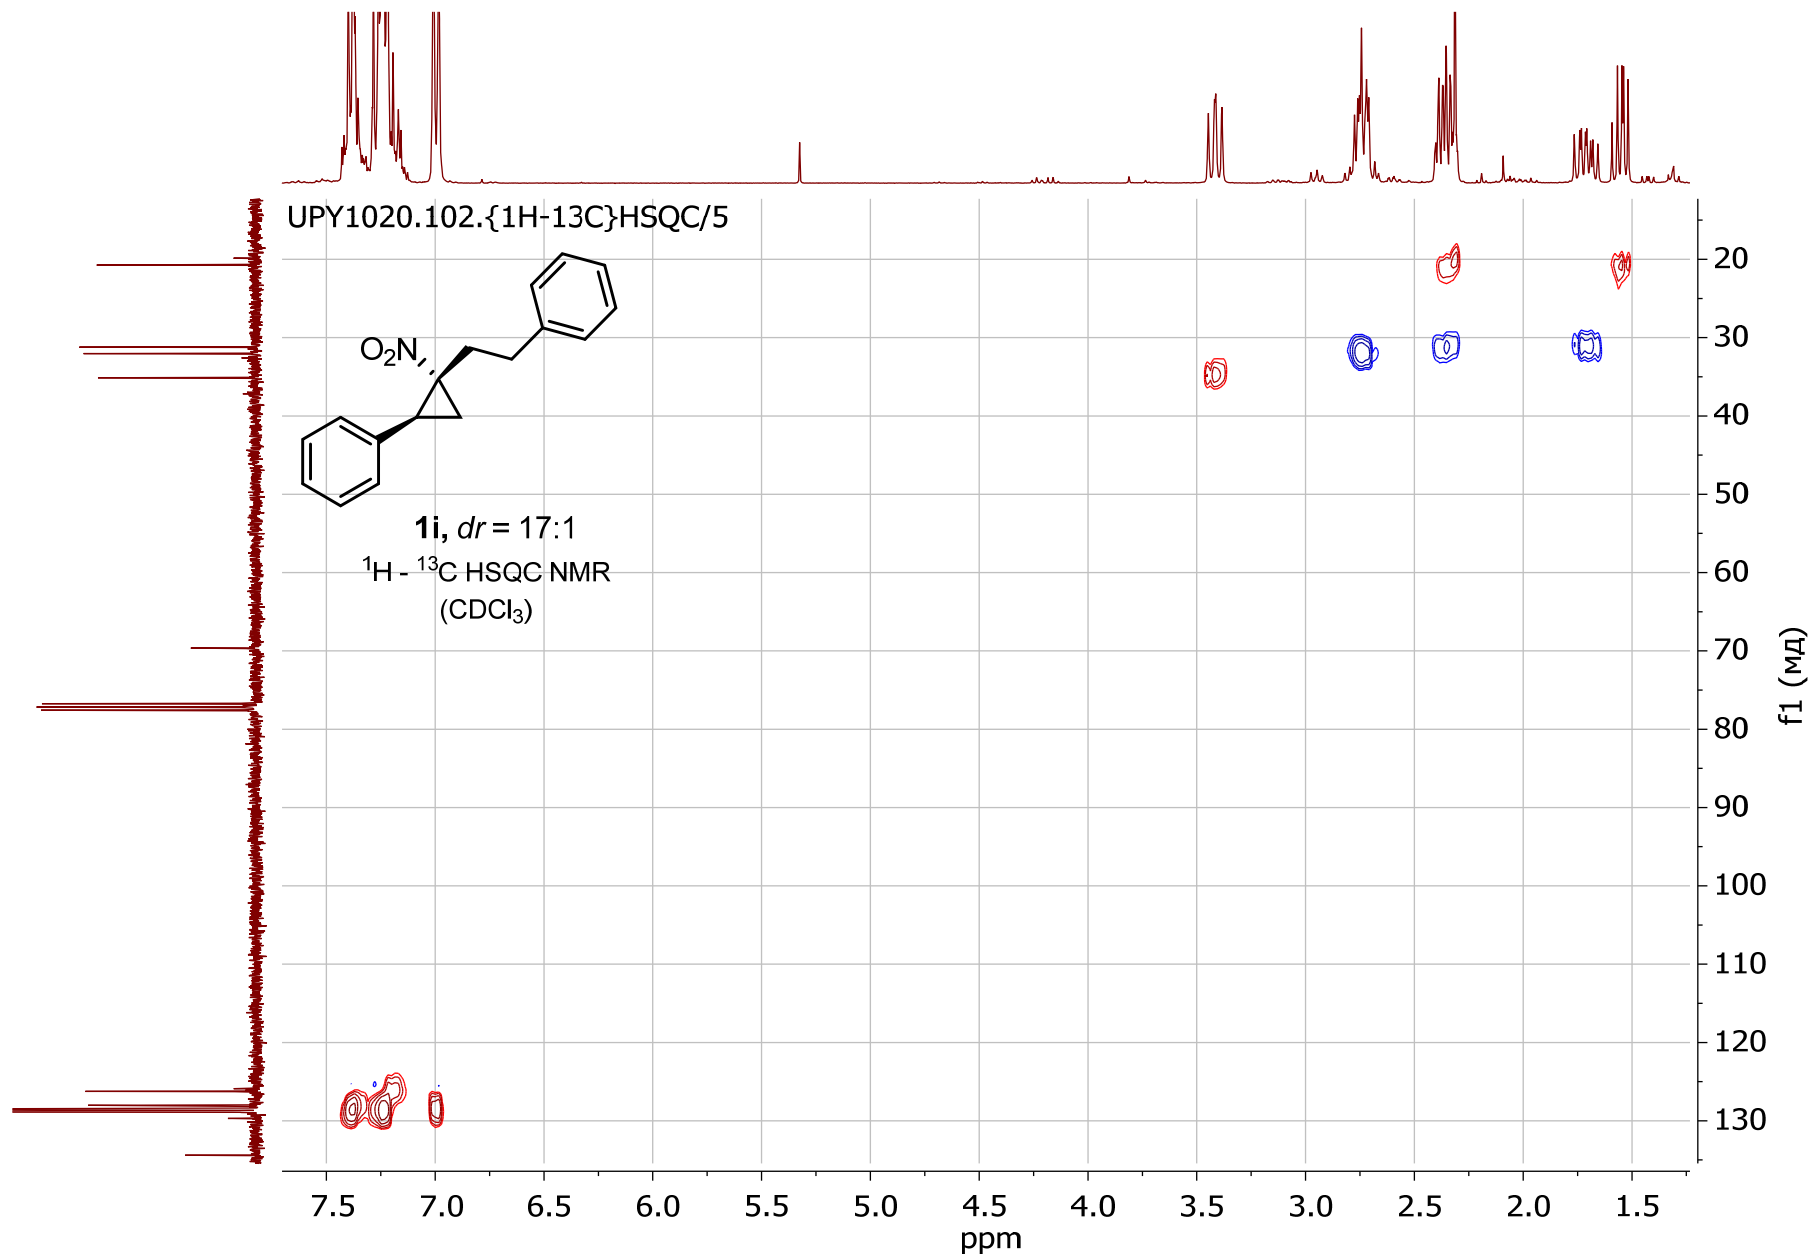

NMR of **1i**

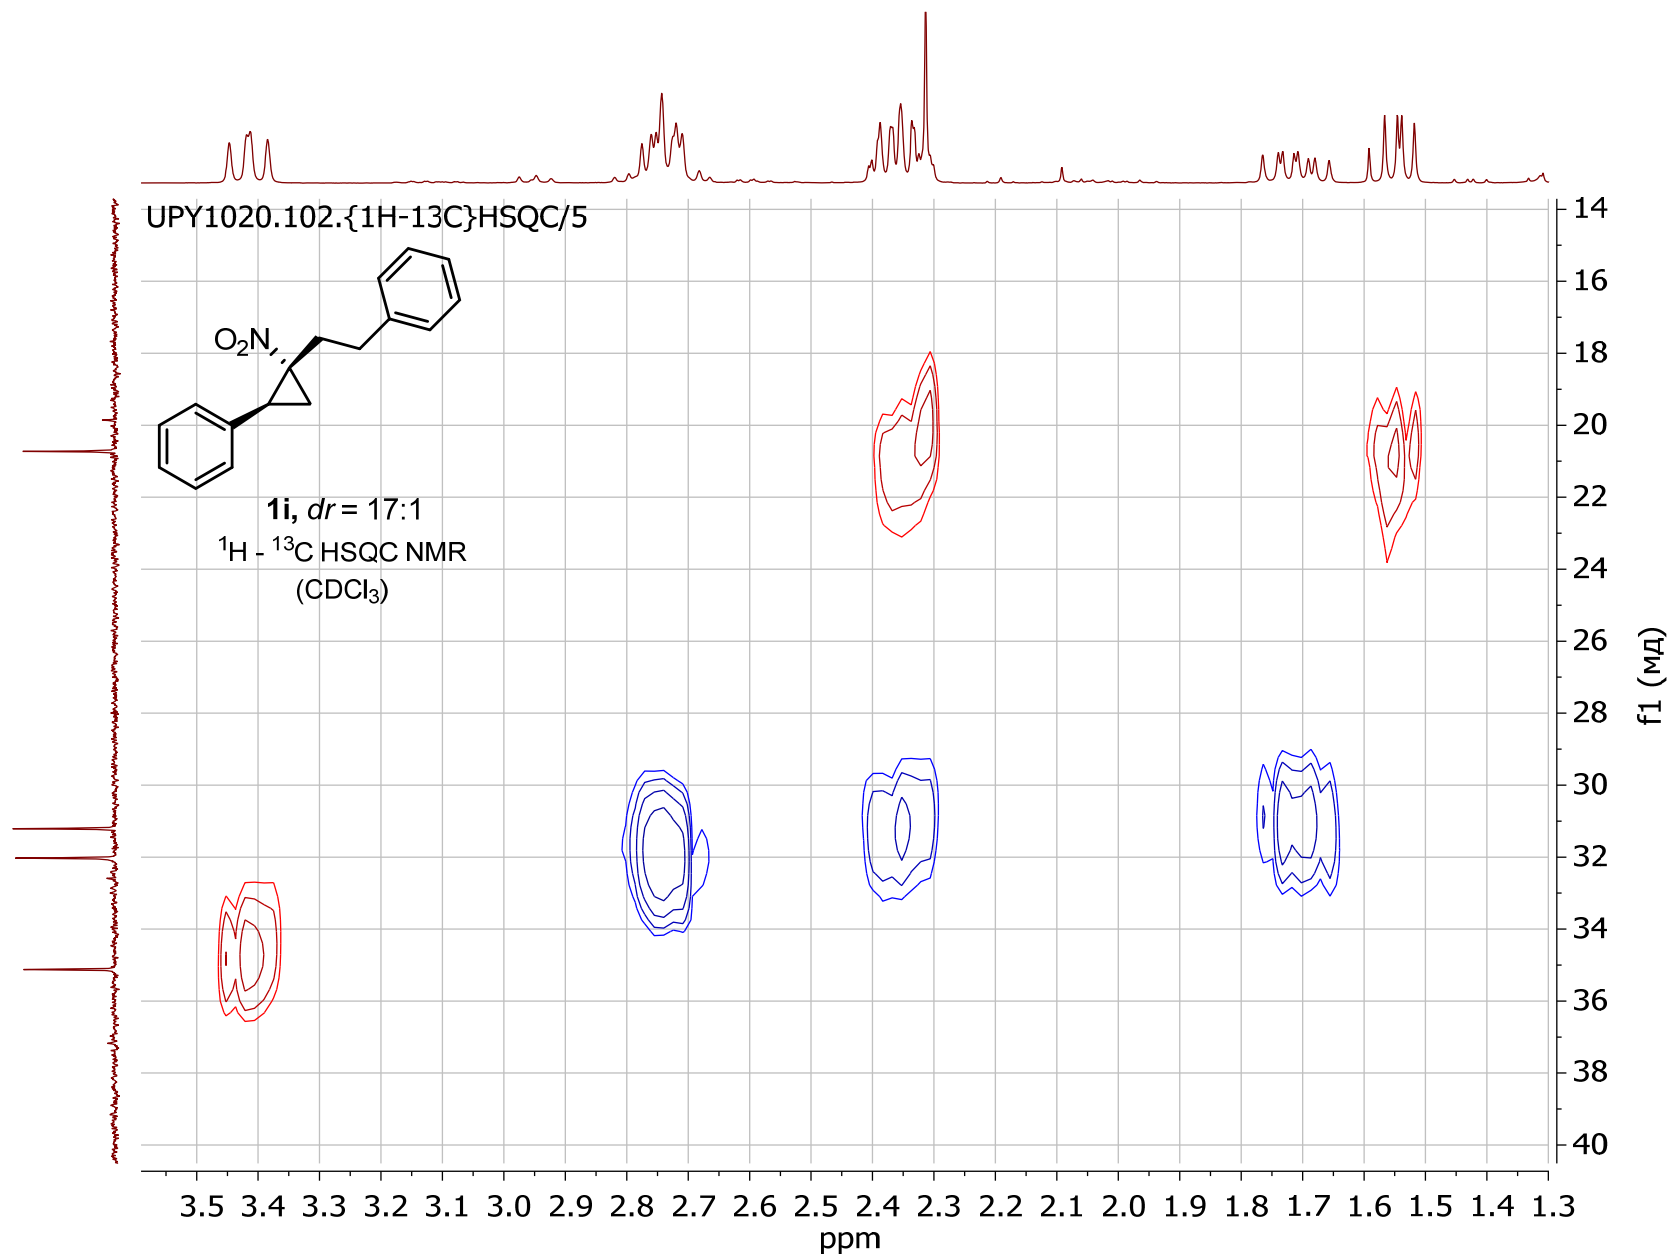



# NMR of 1j

UPY975.100.{1H}/1  
/ILDT UPY975.100 Tabolin-10011

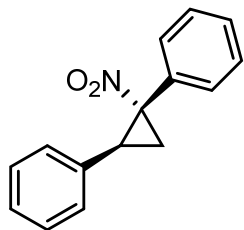

**1j**, *dr* = 14:1

<sup>1</sup>H NMR (300 MHz, CDCl<sub>3</sub>)

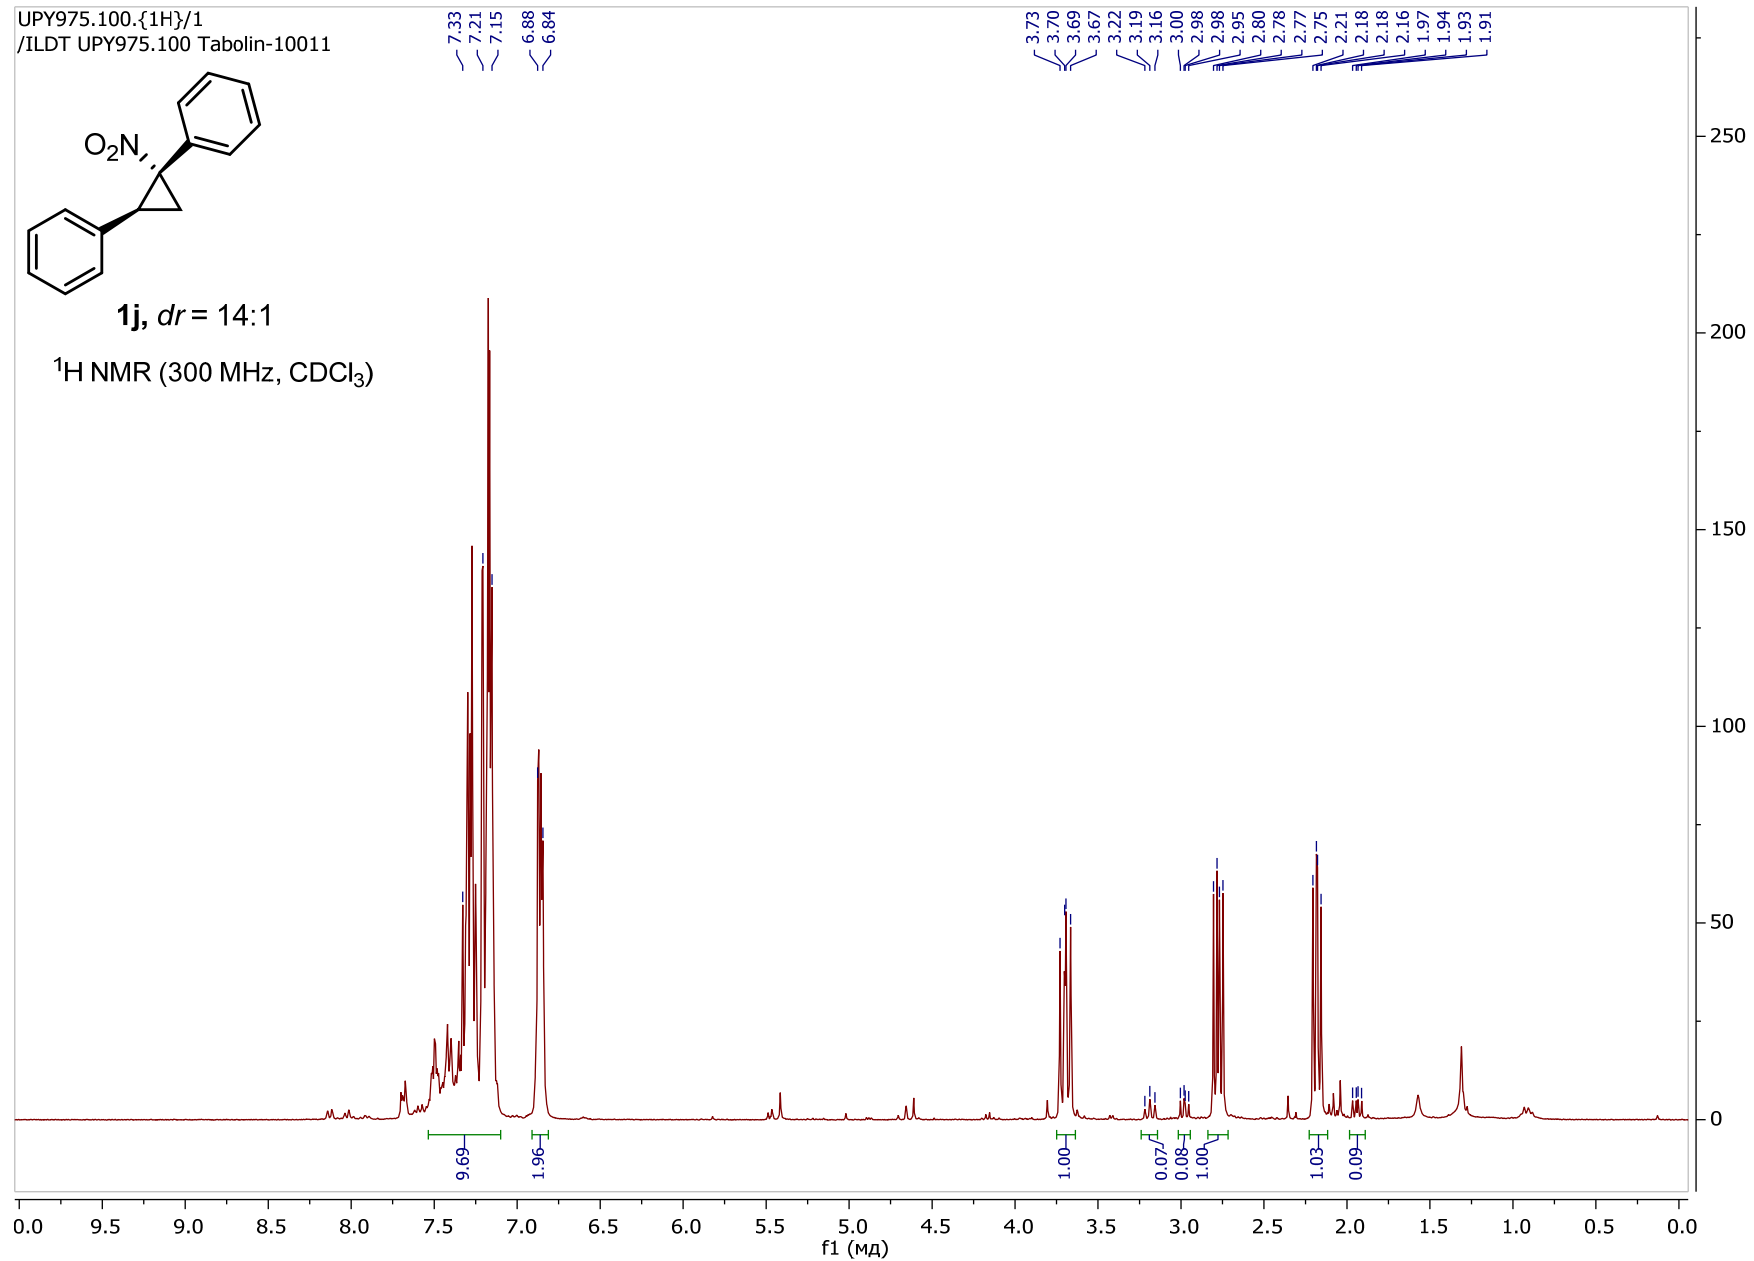

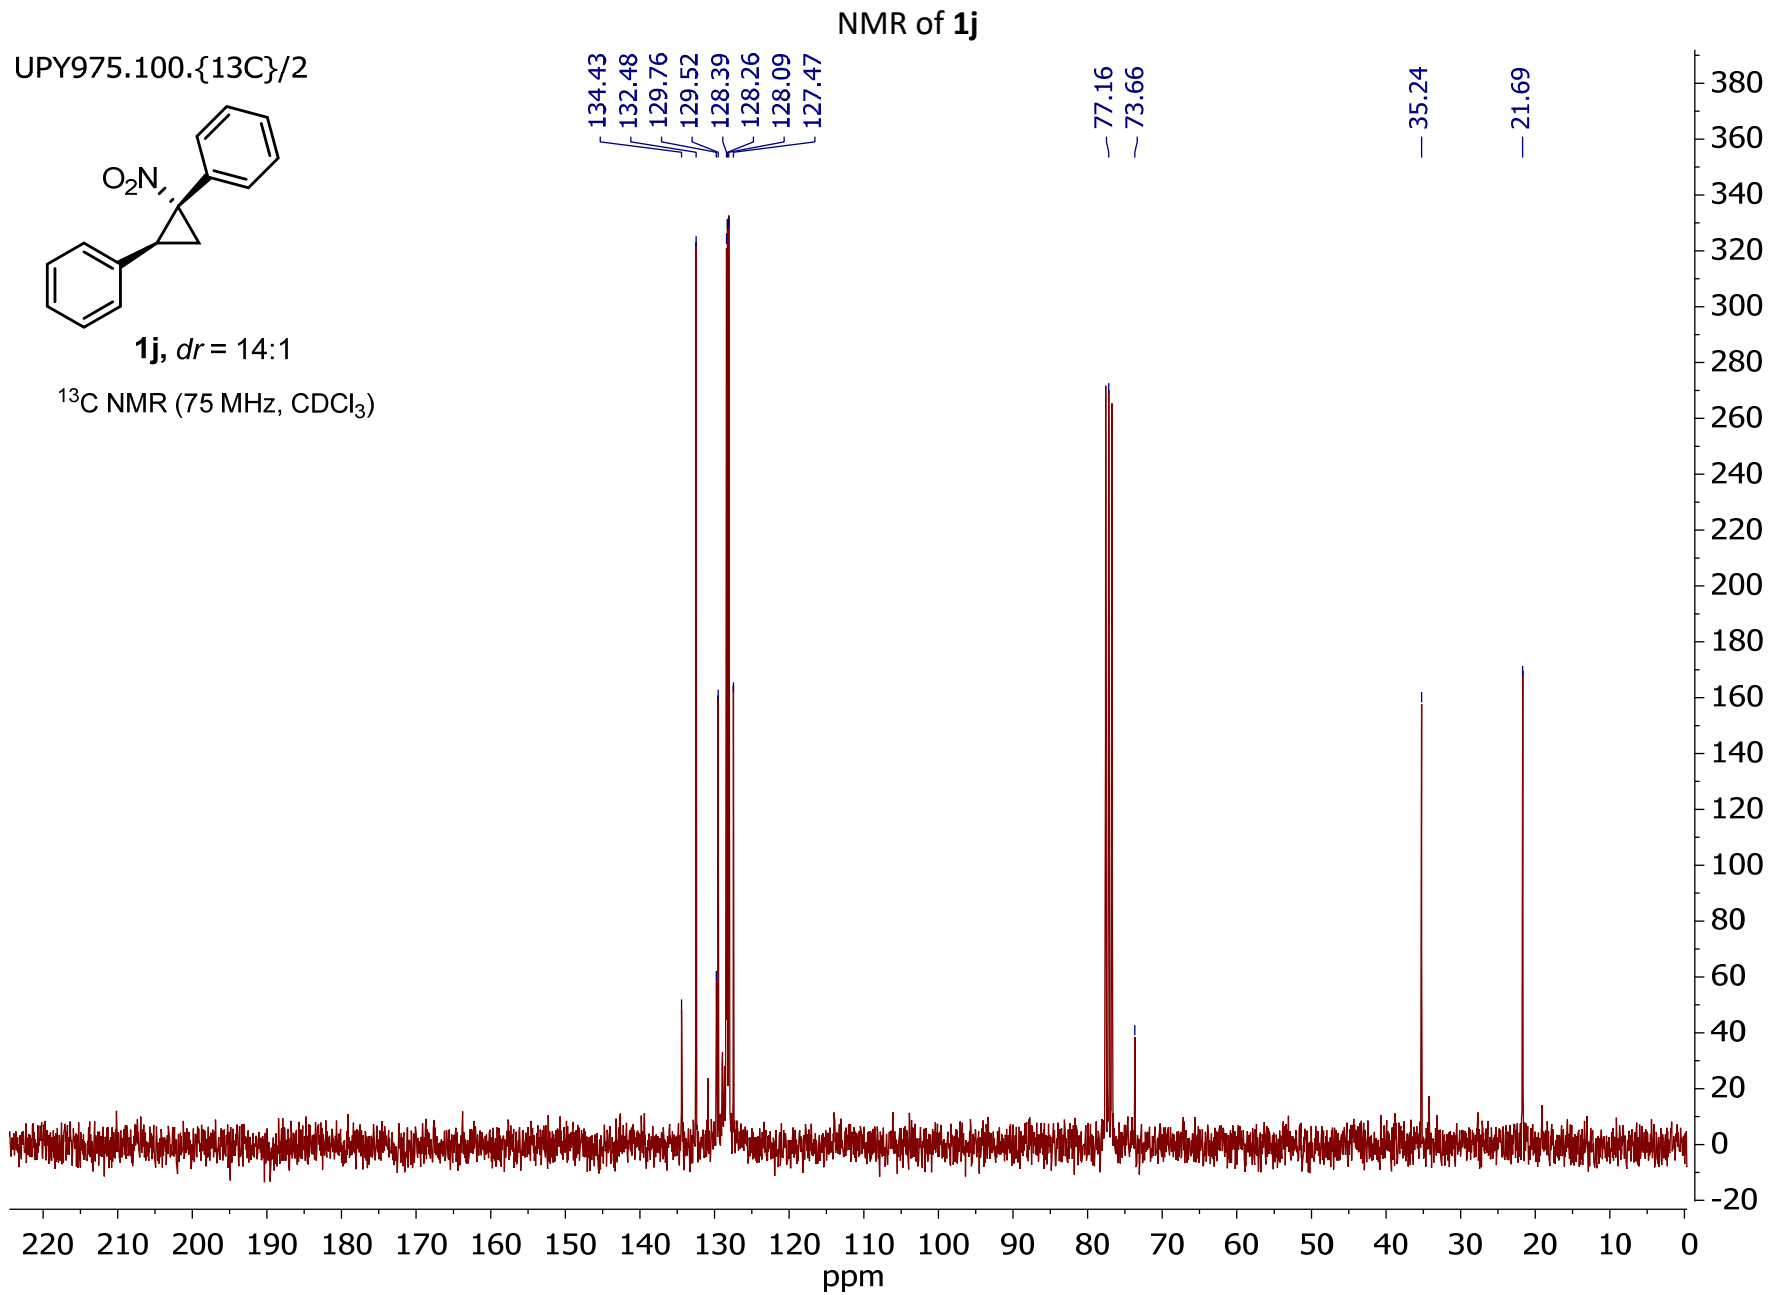

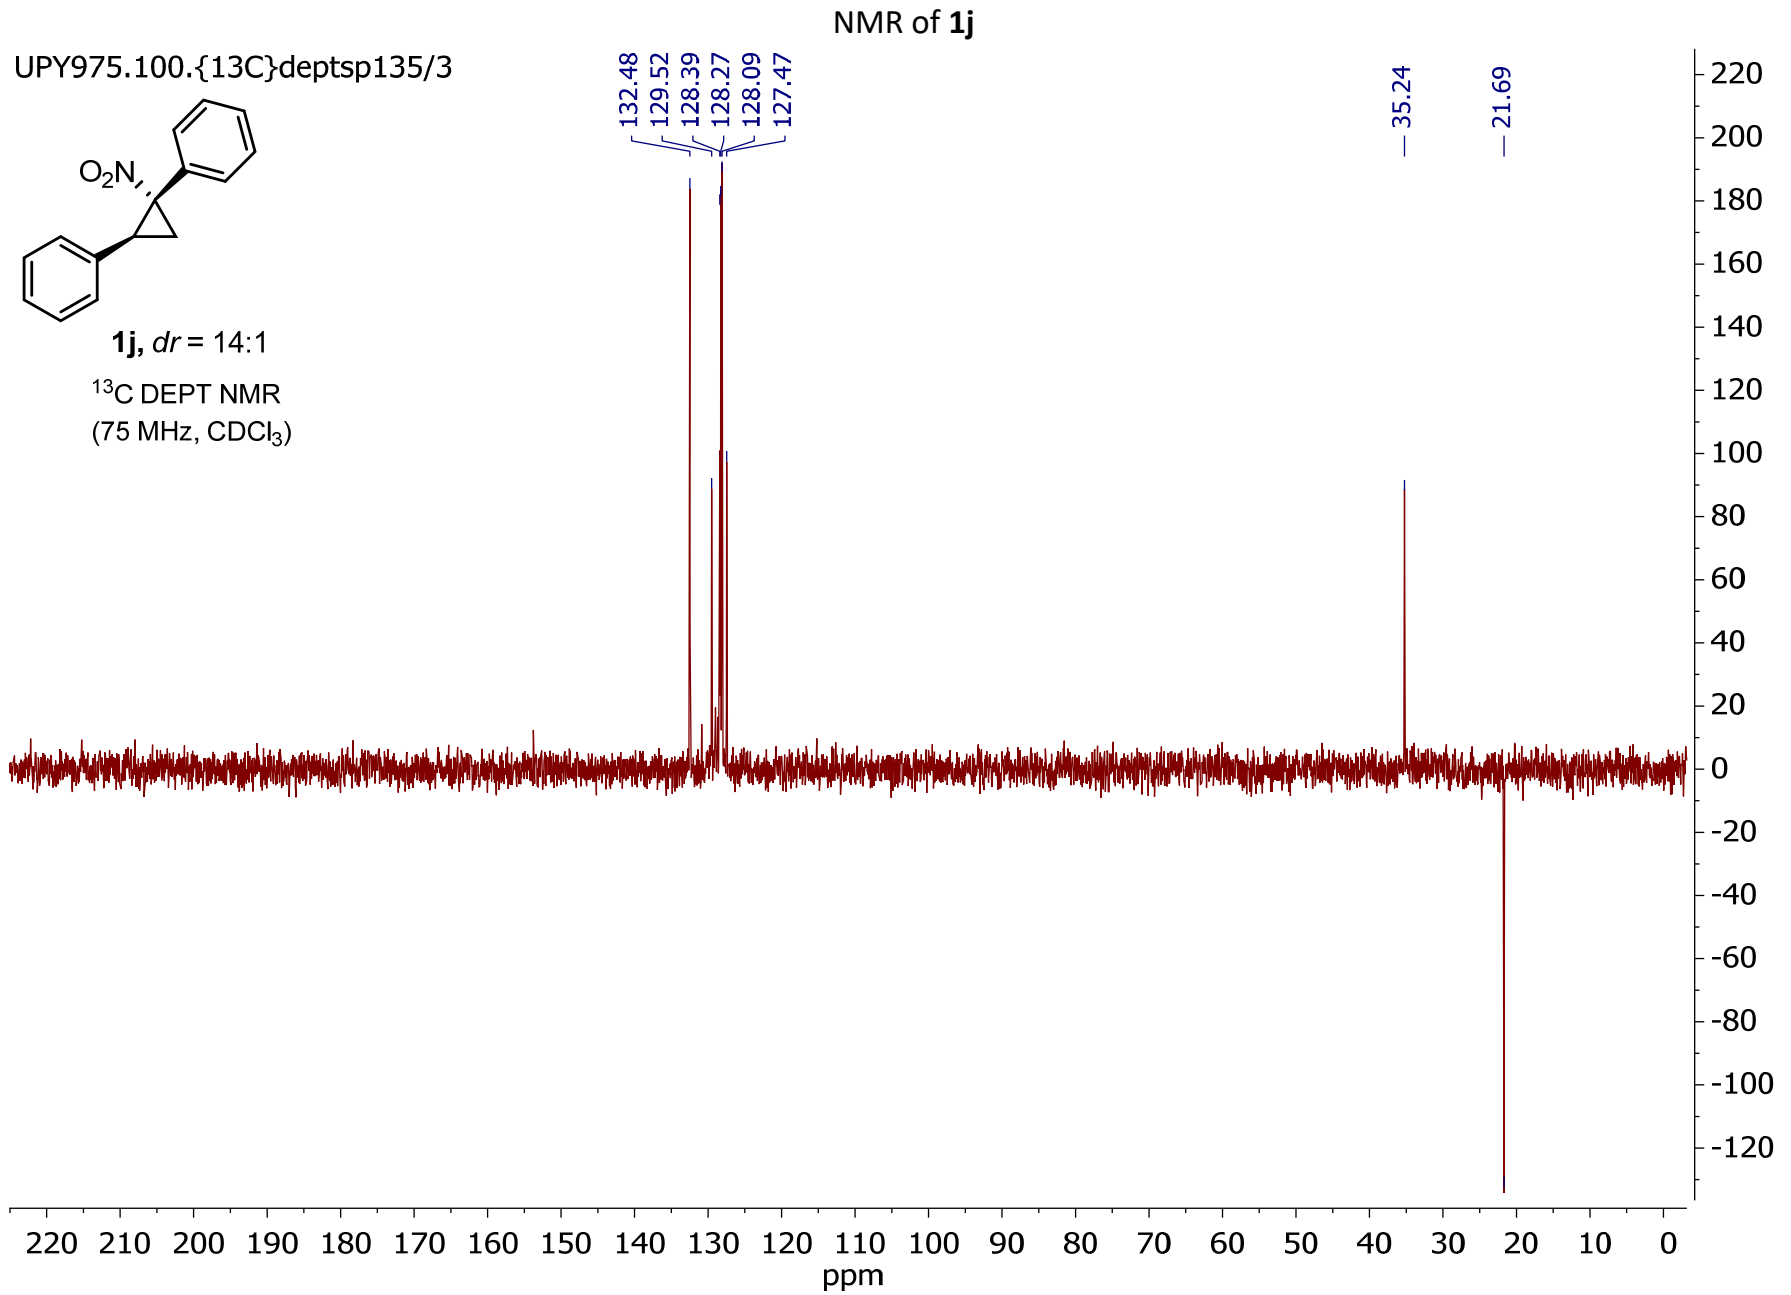

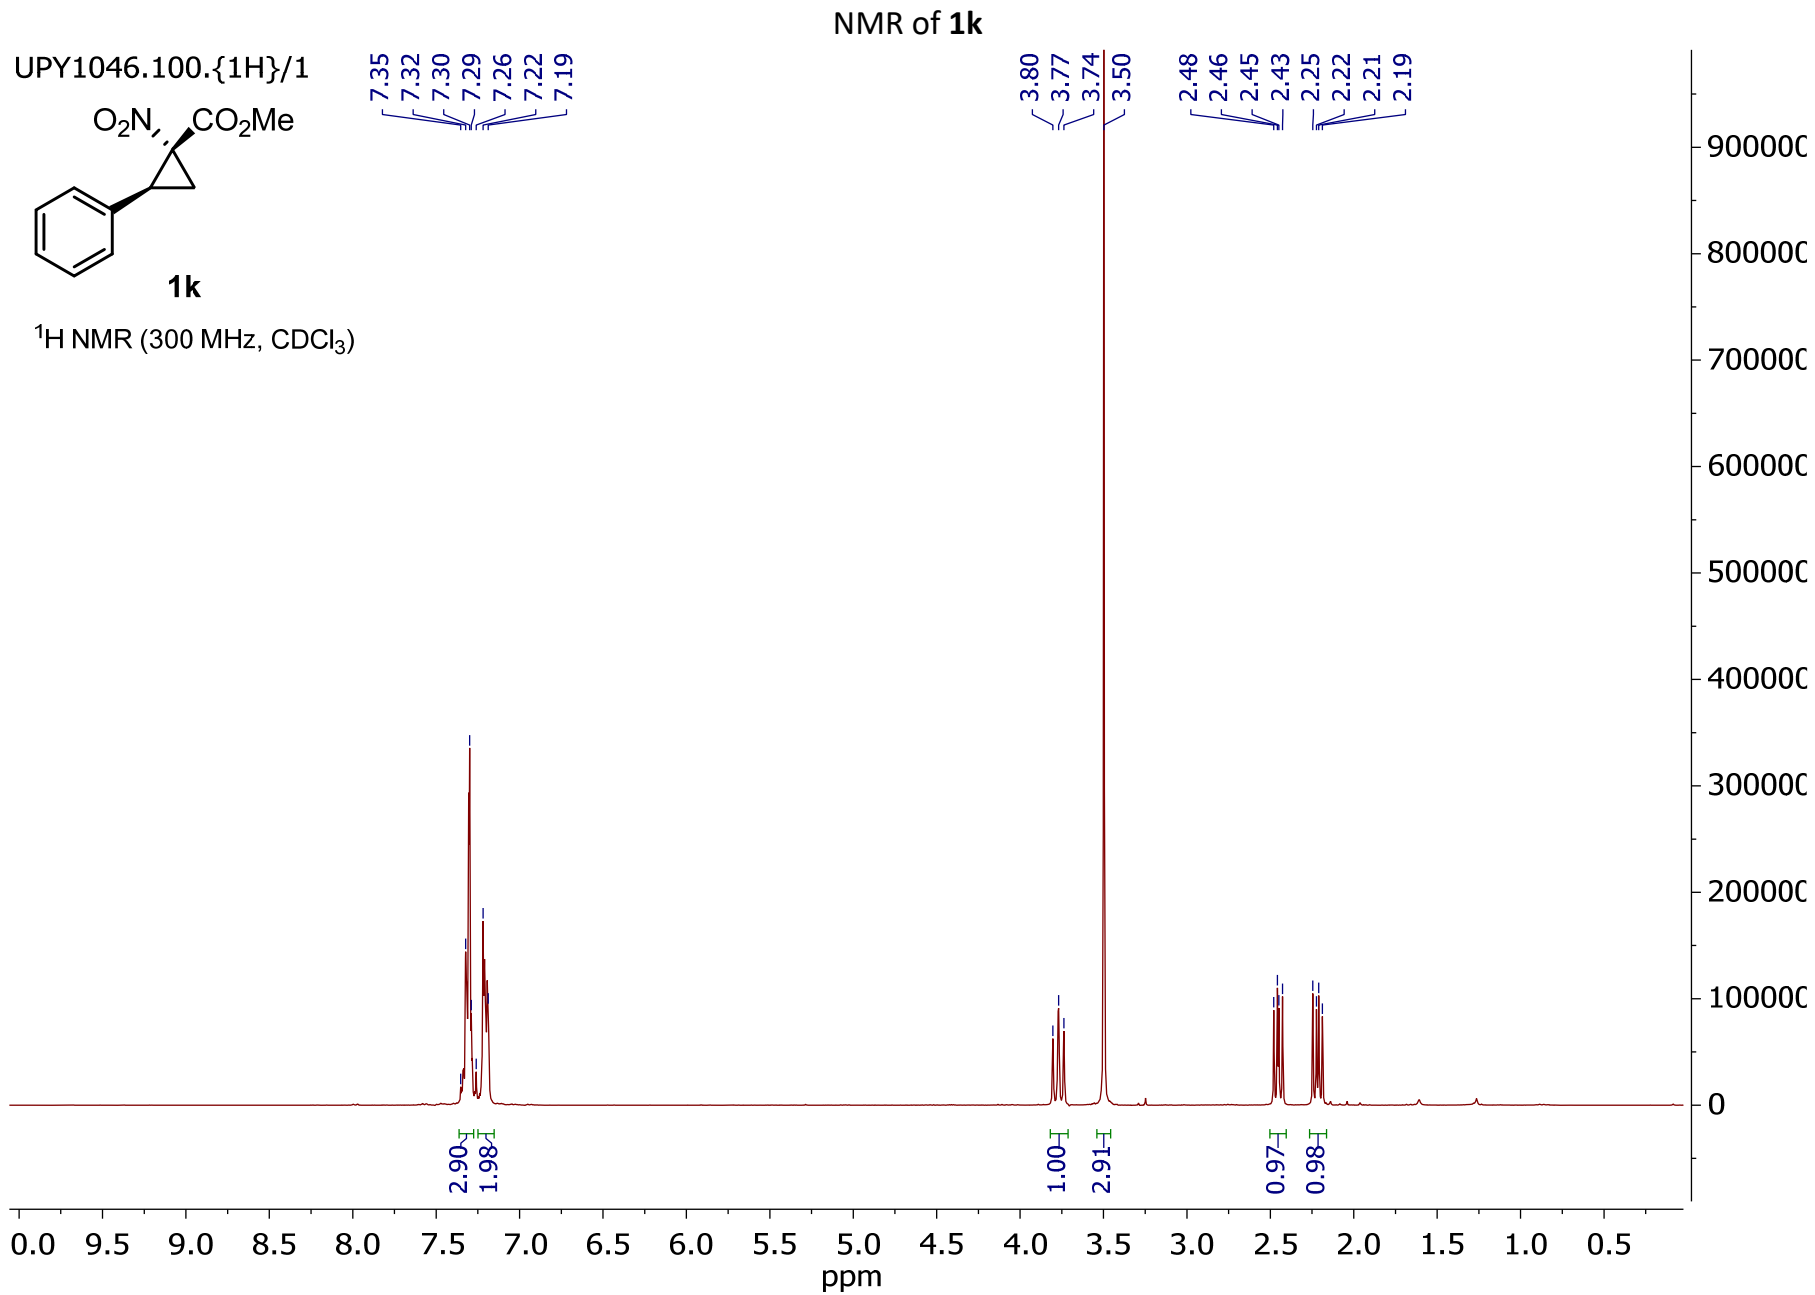

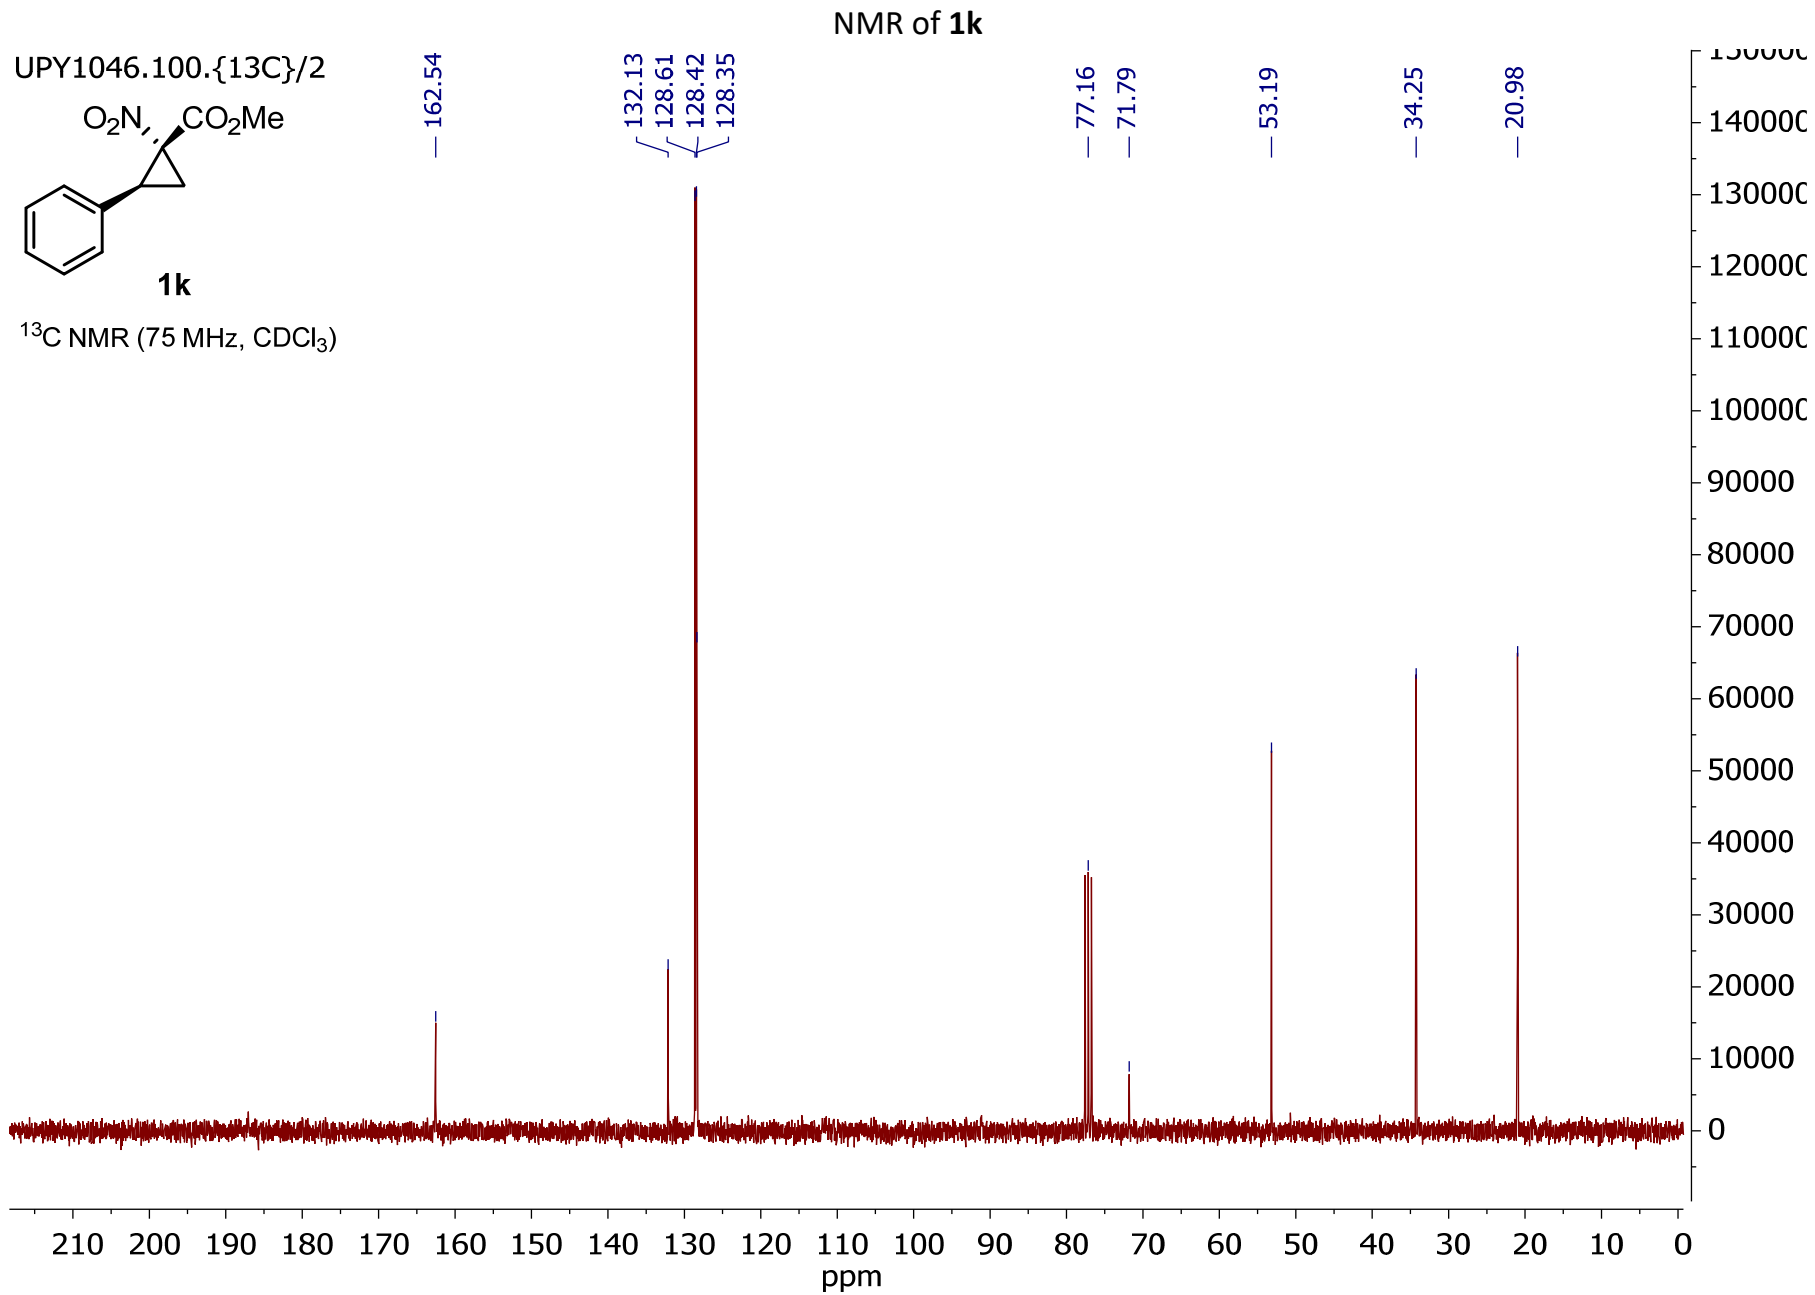

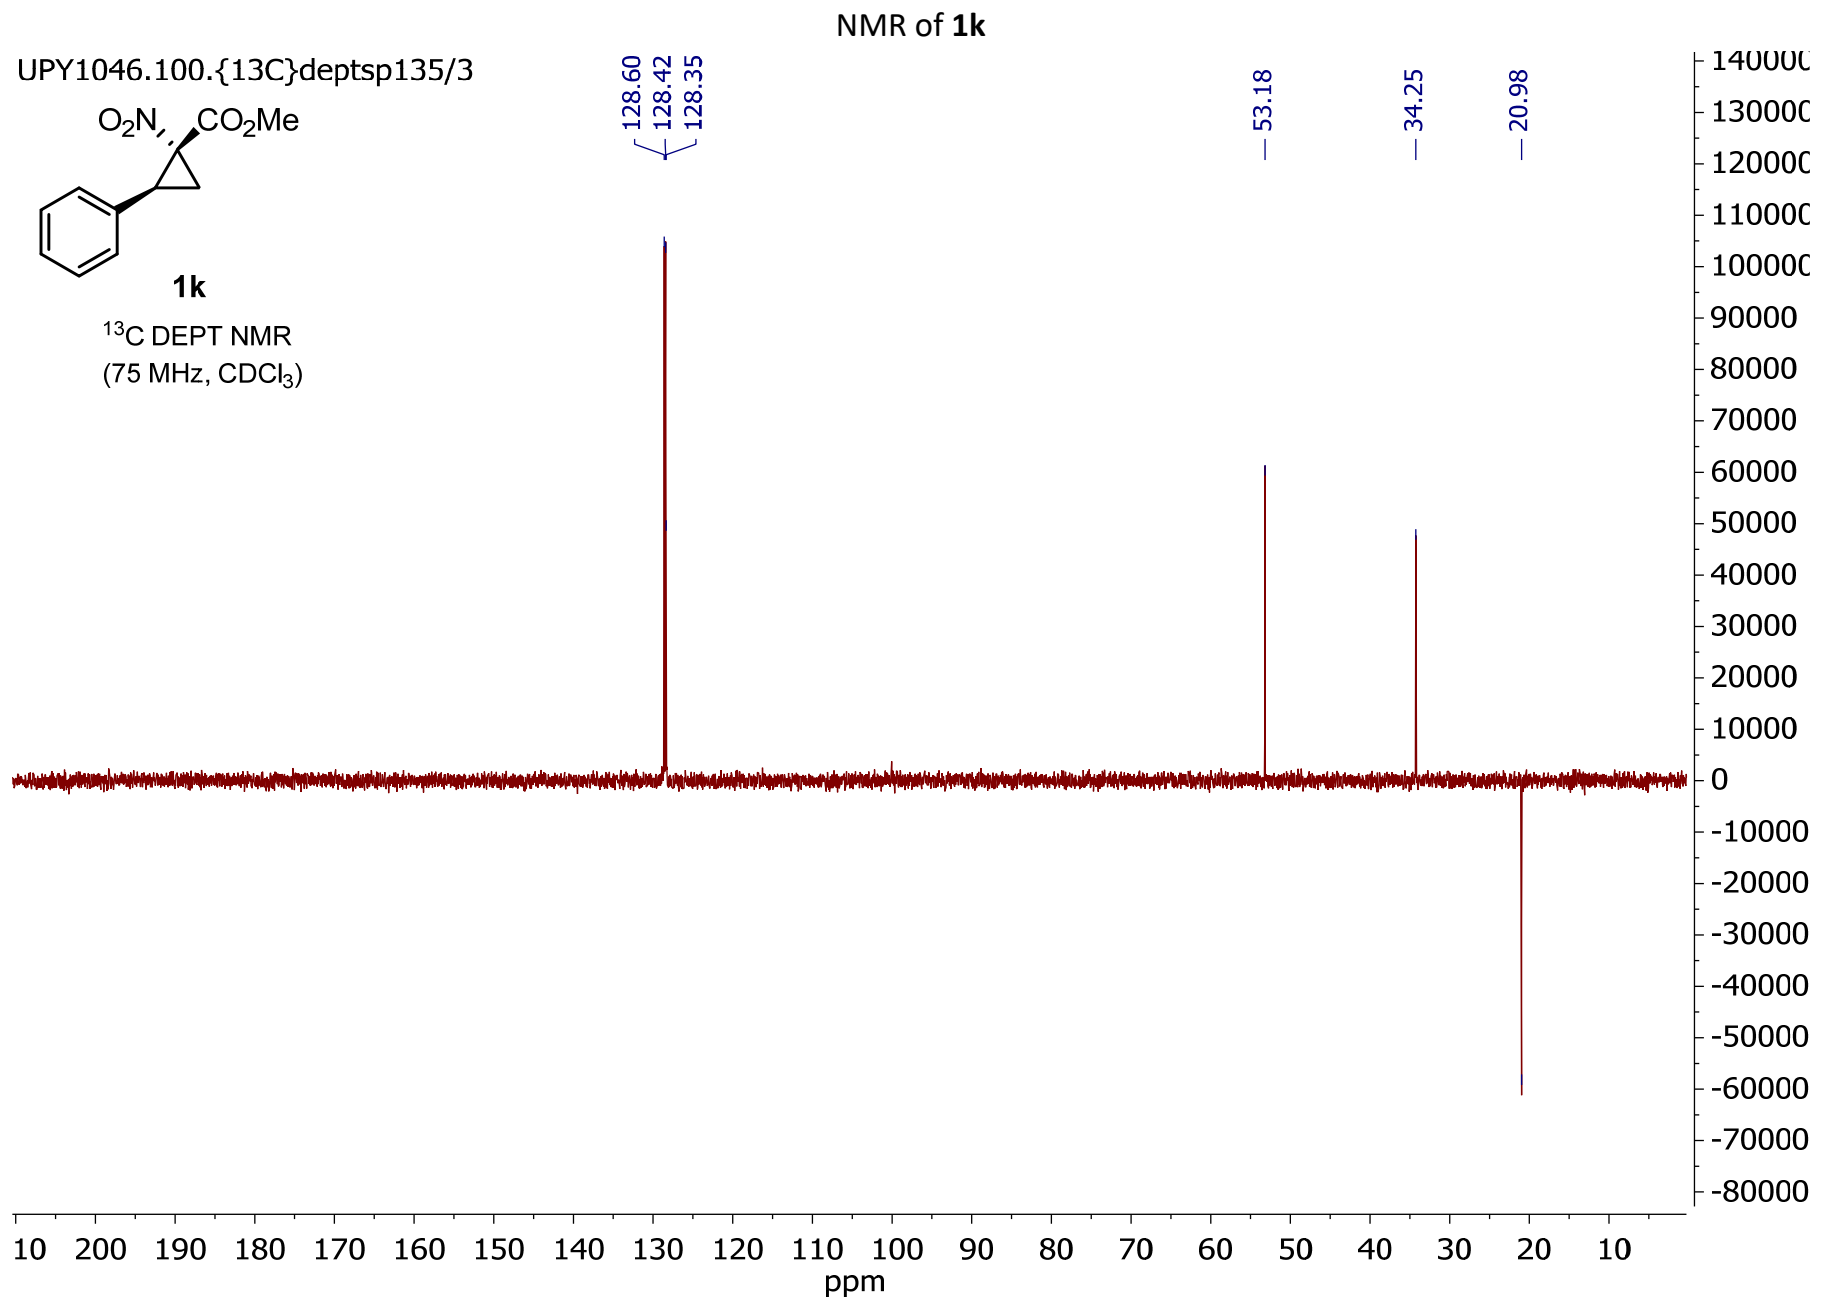

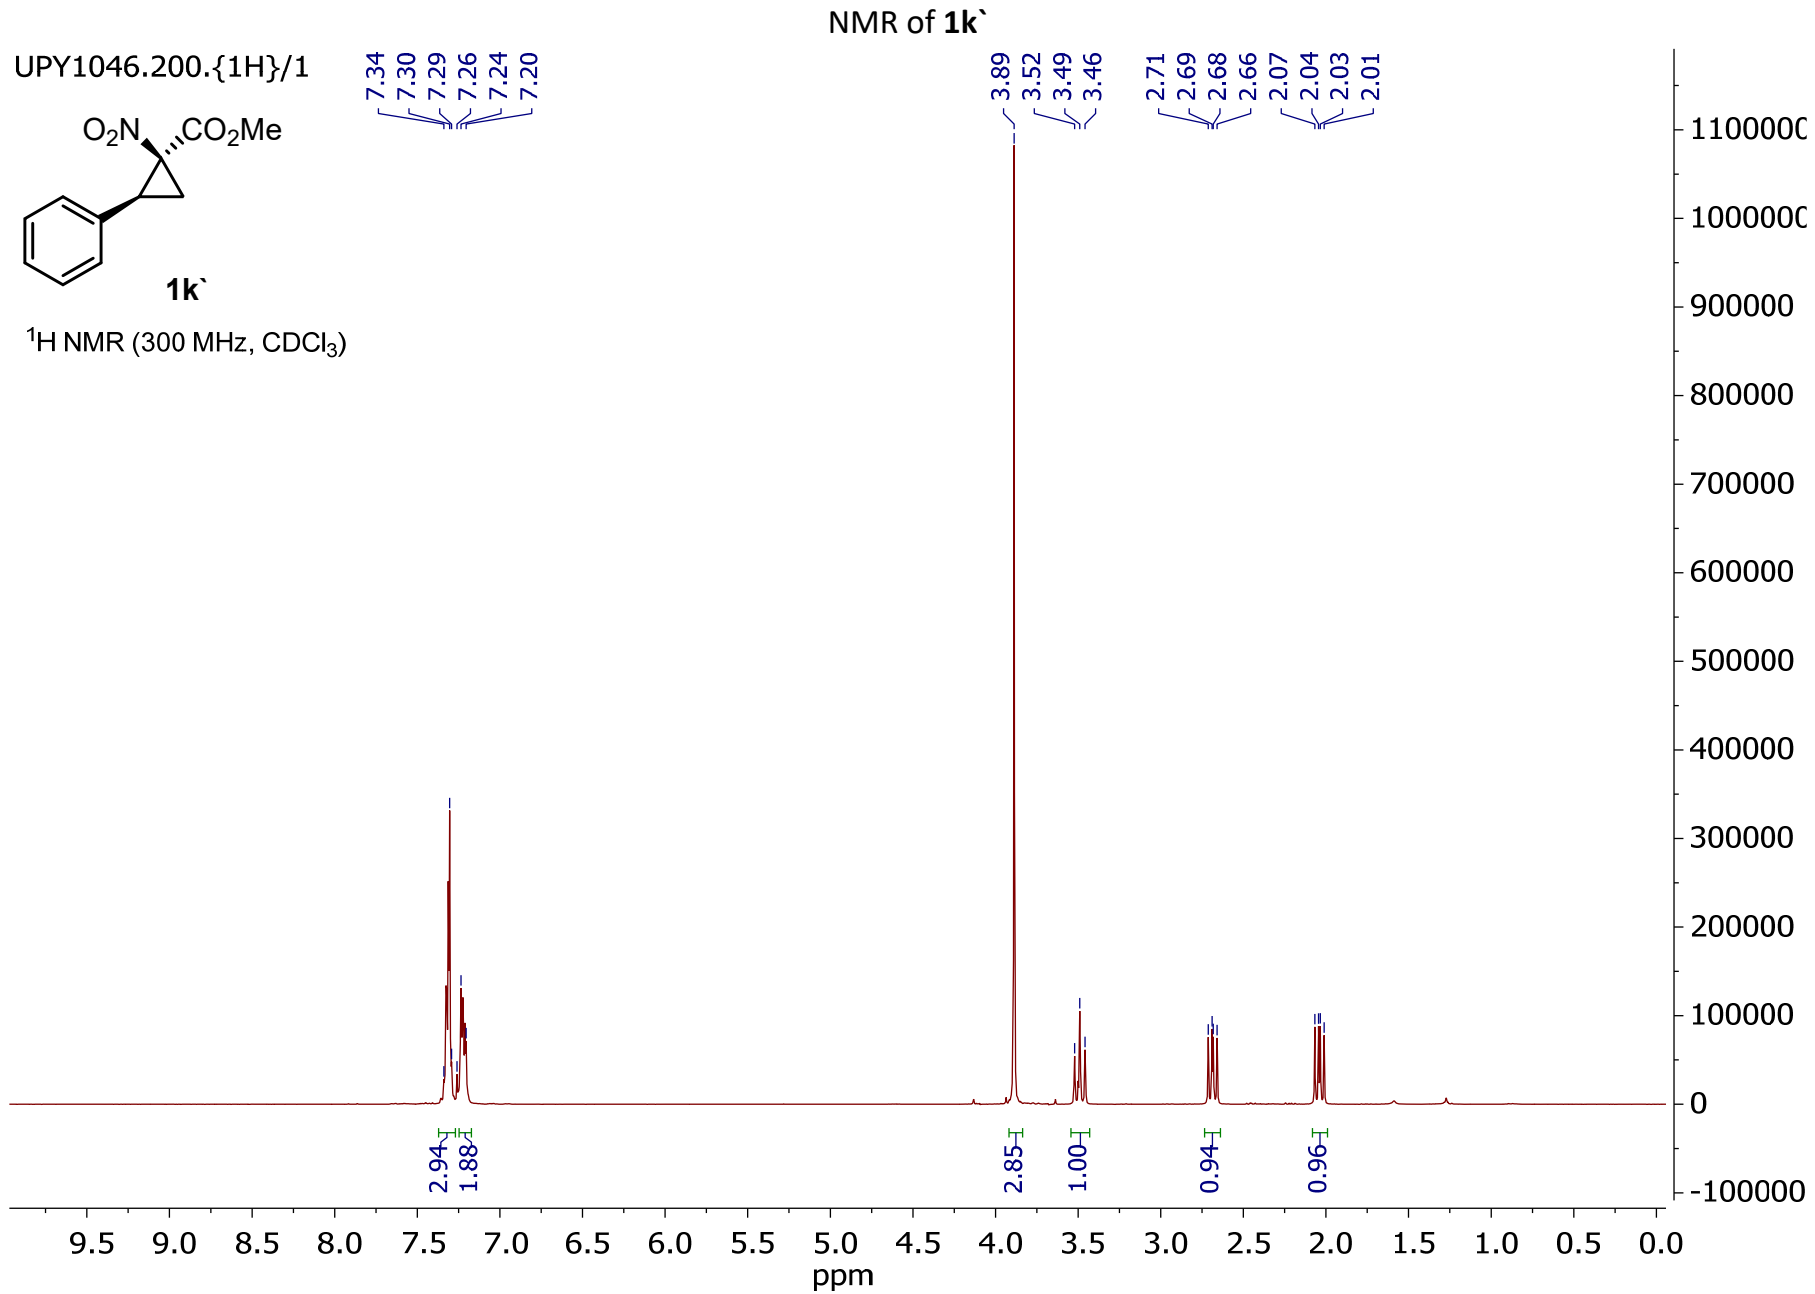

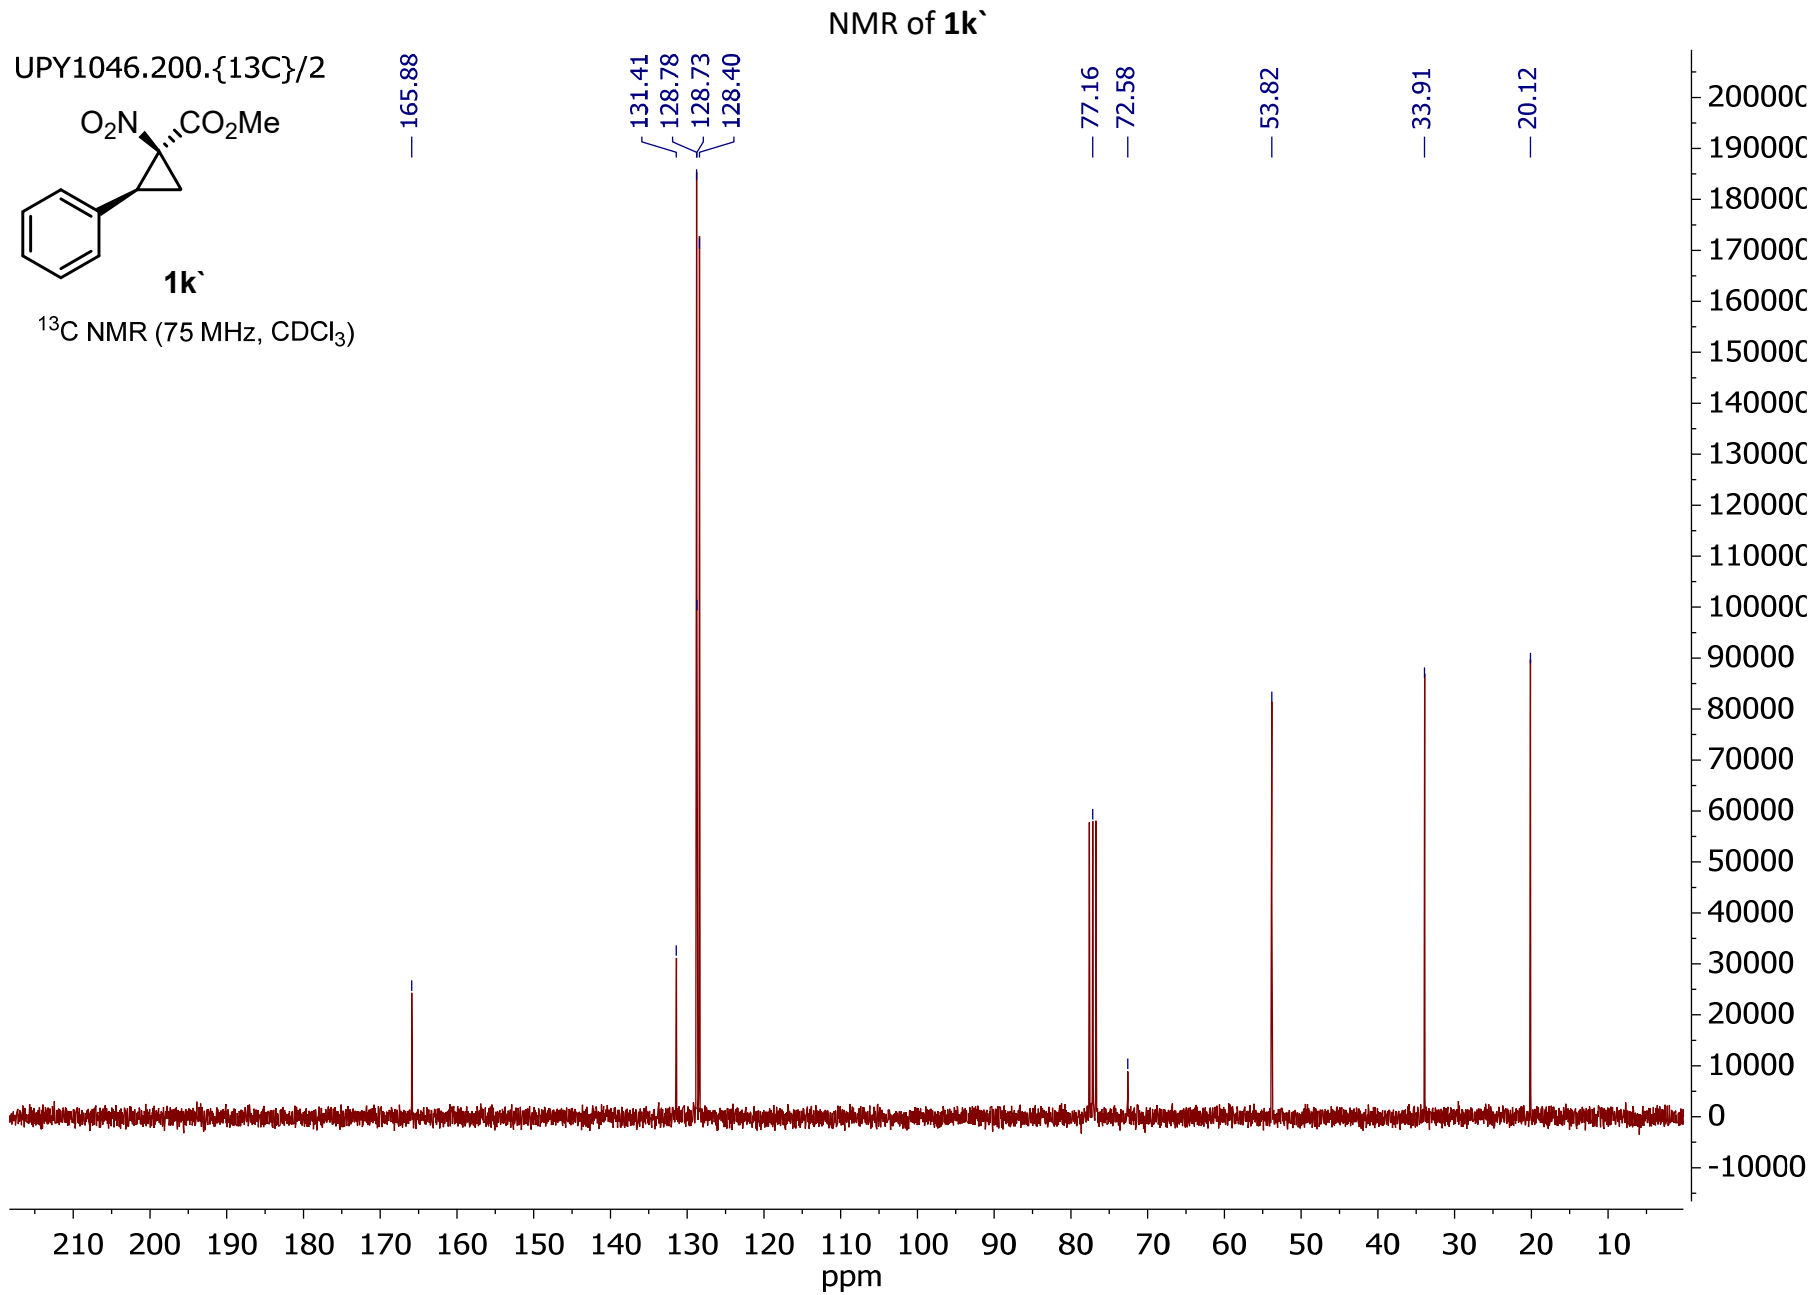



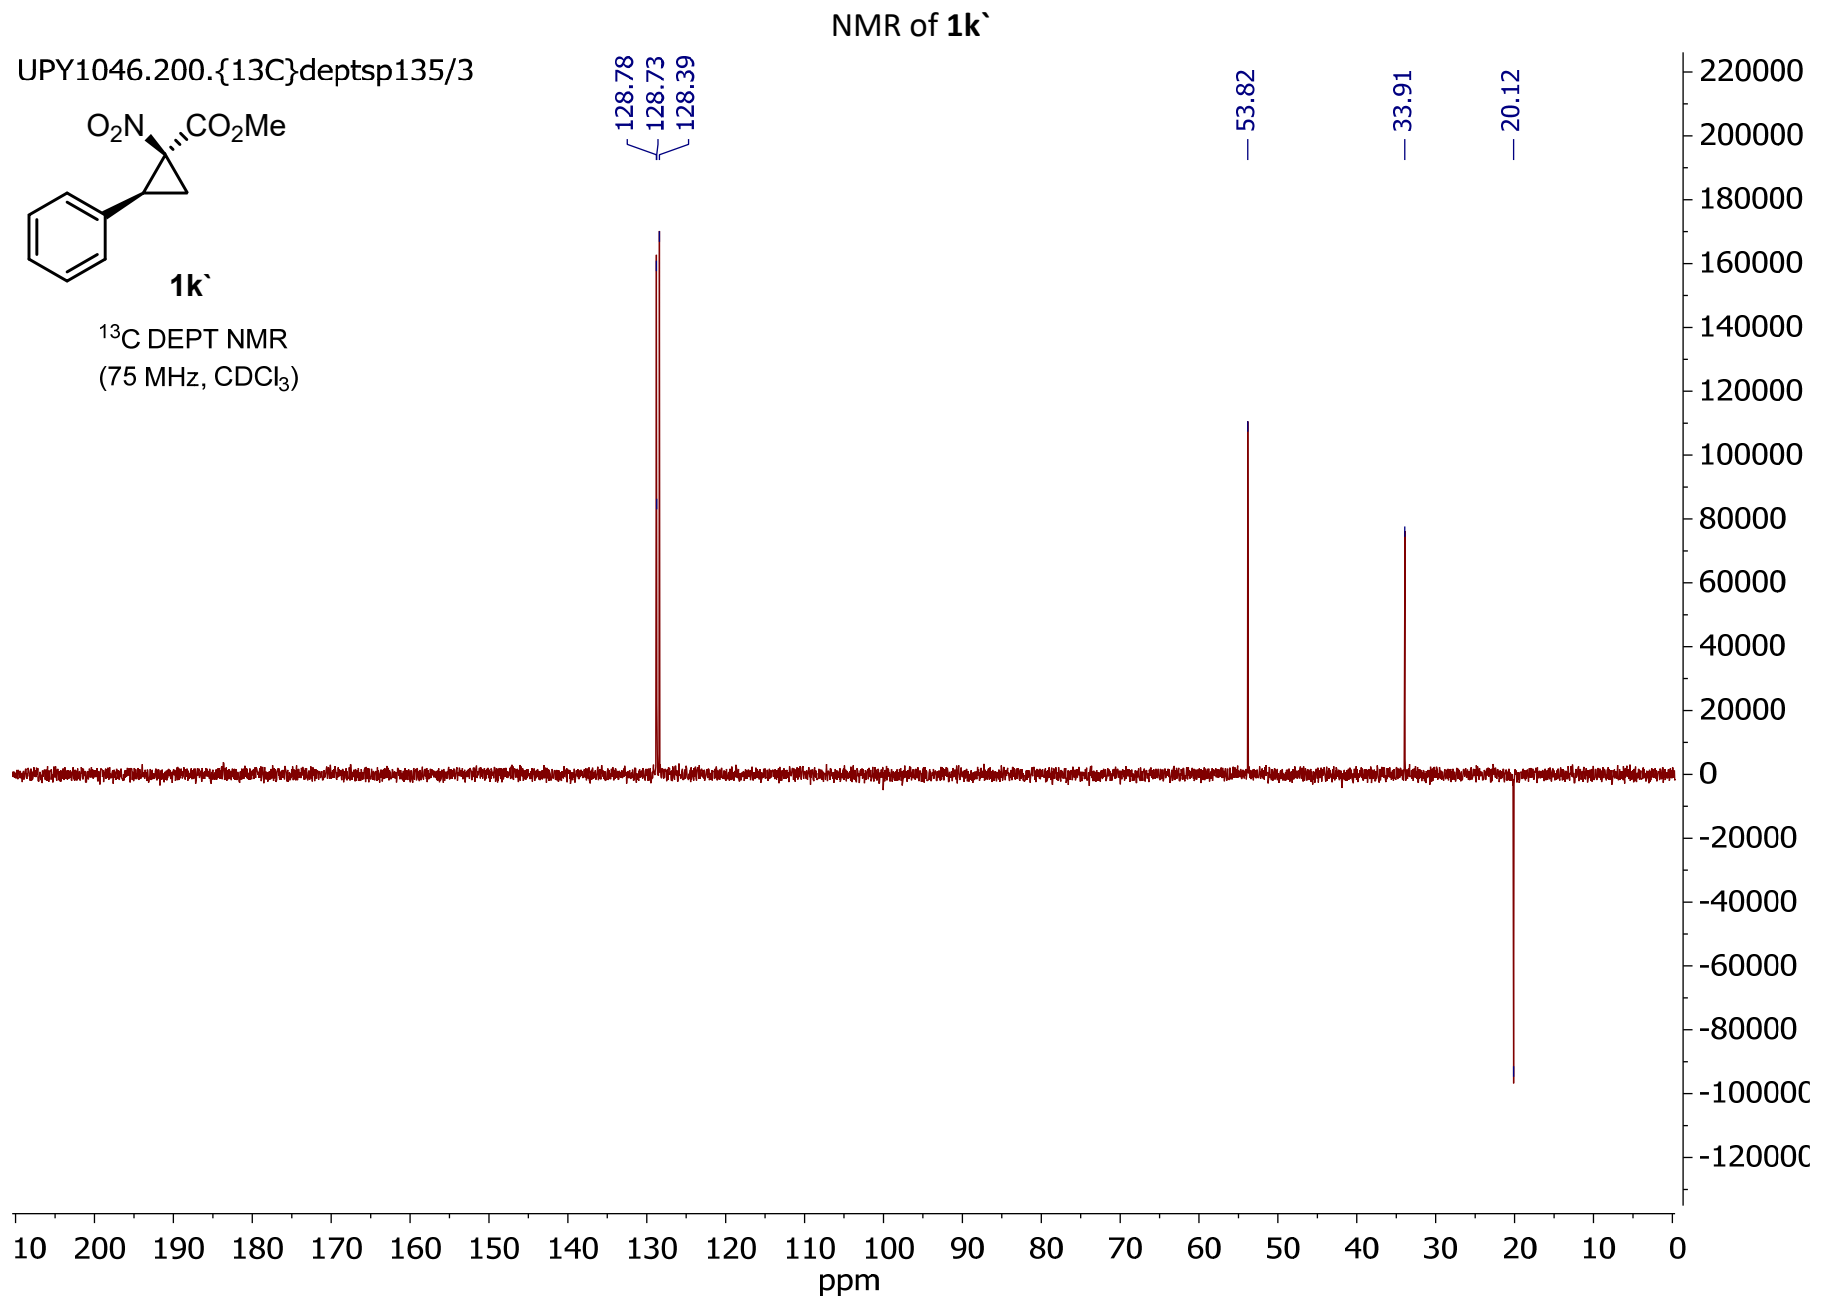

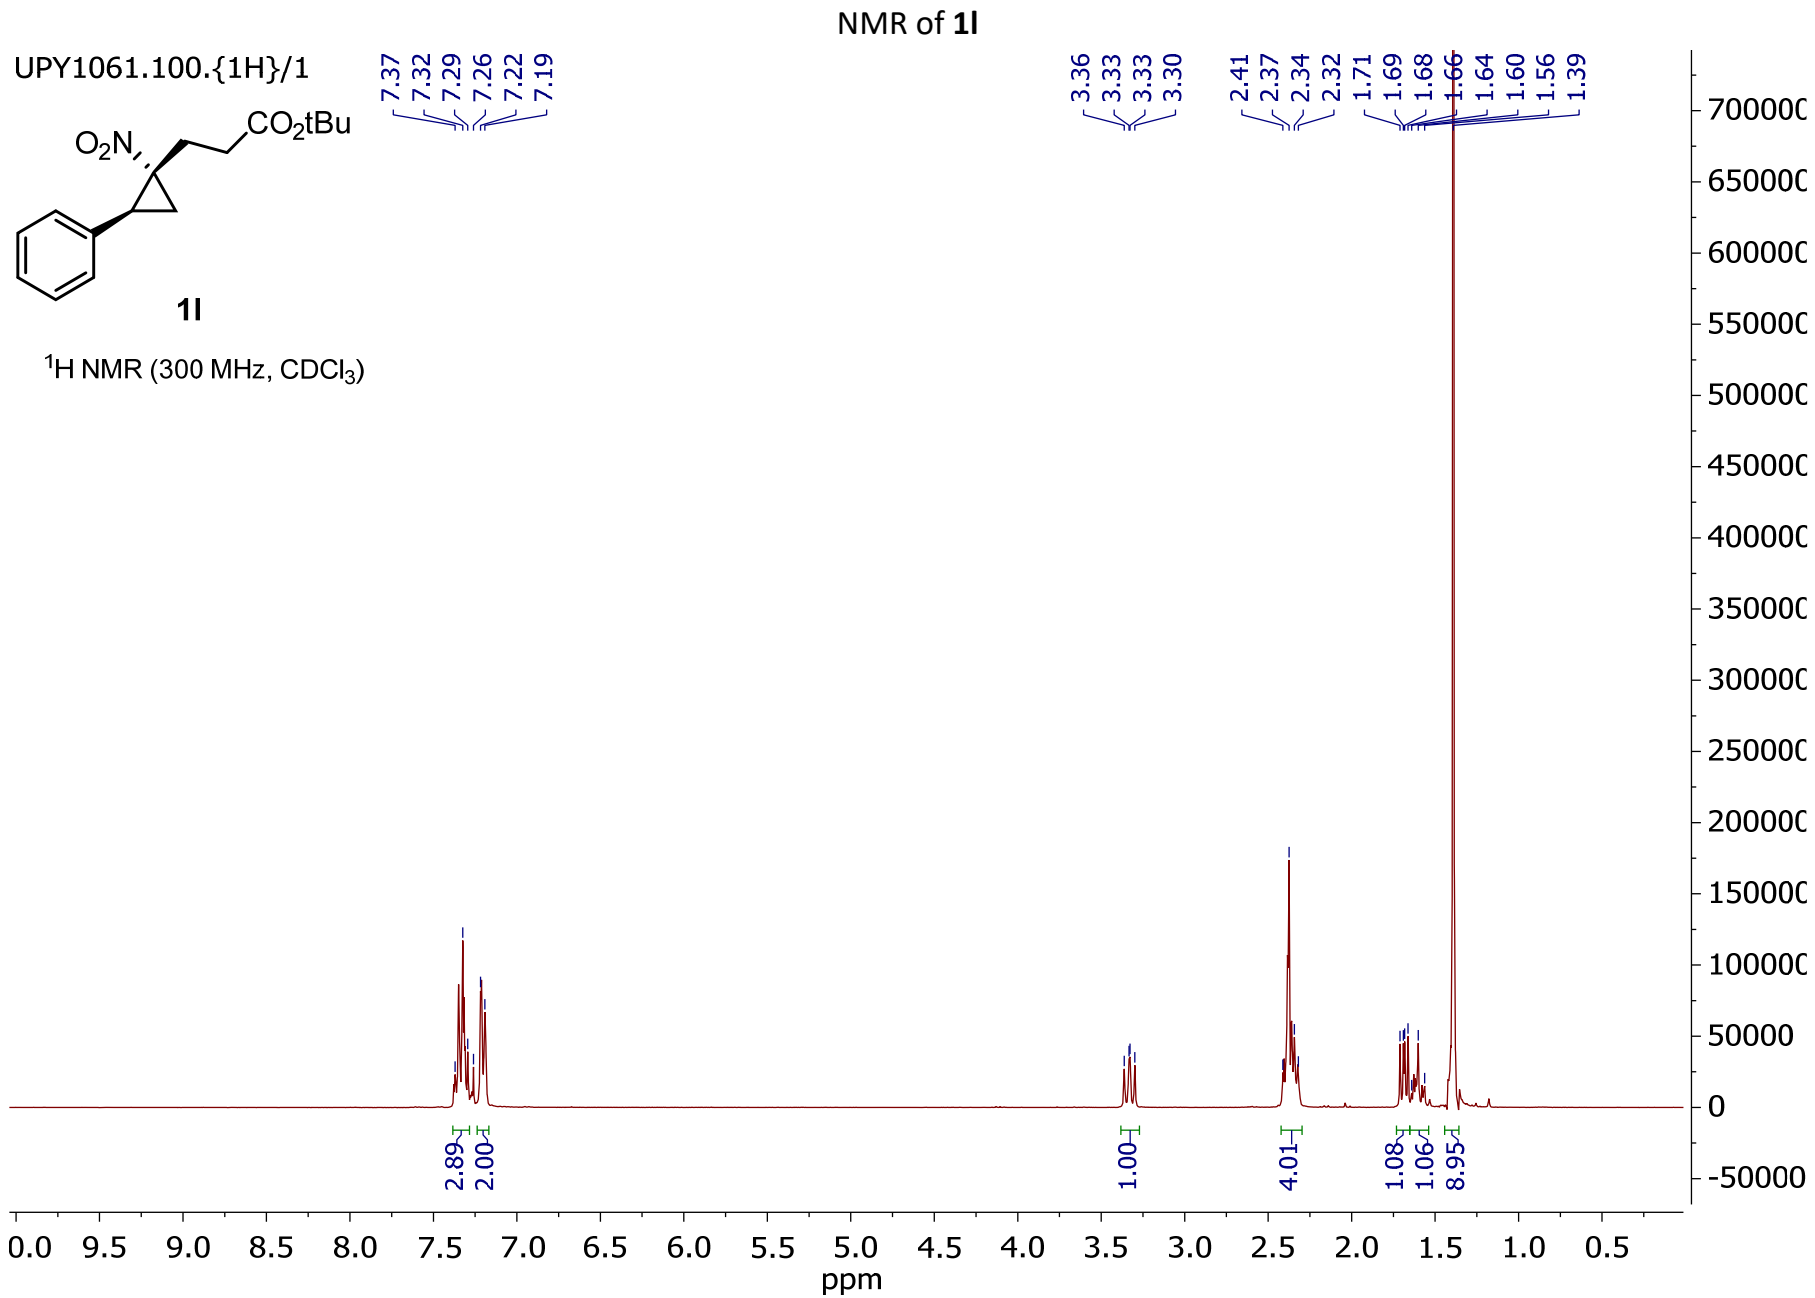

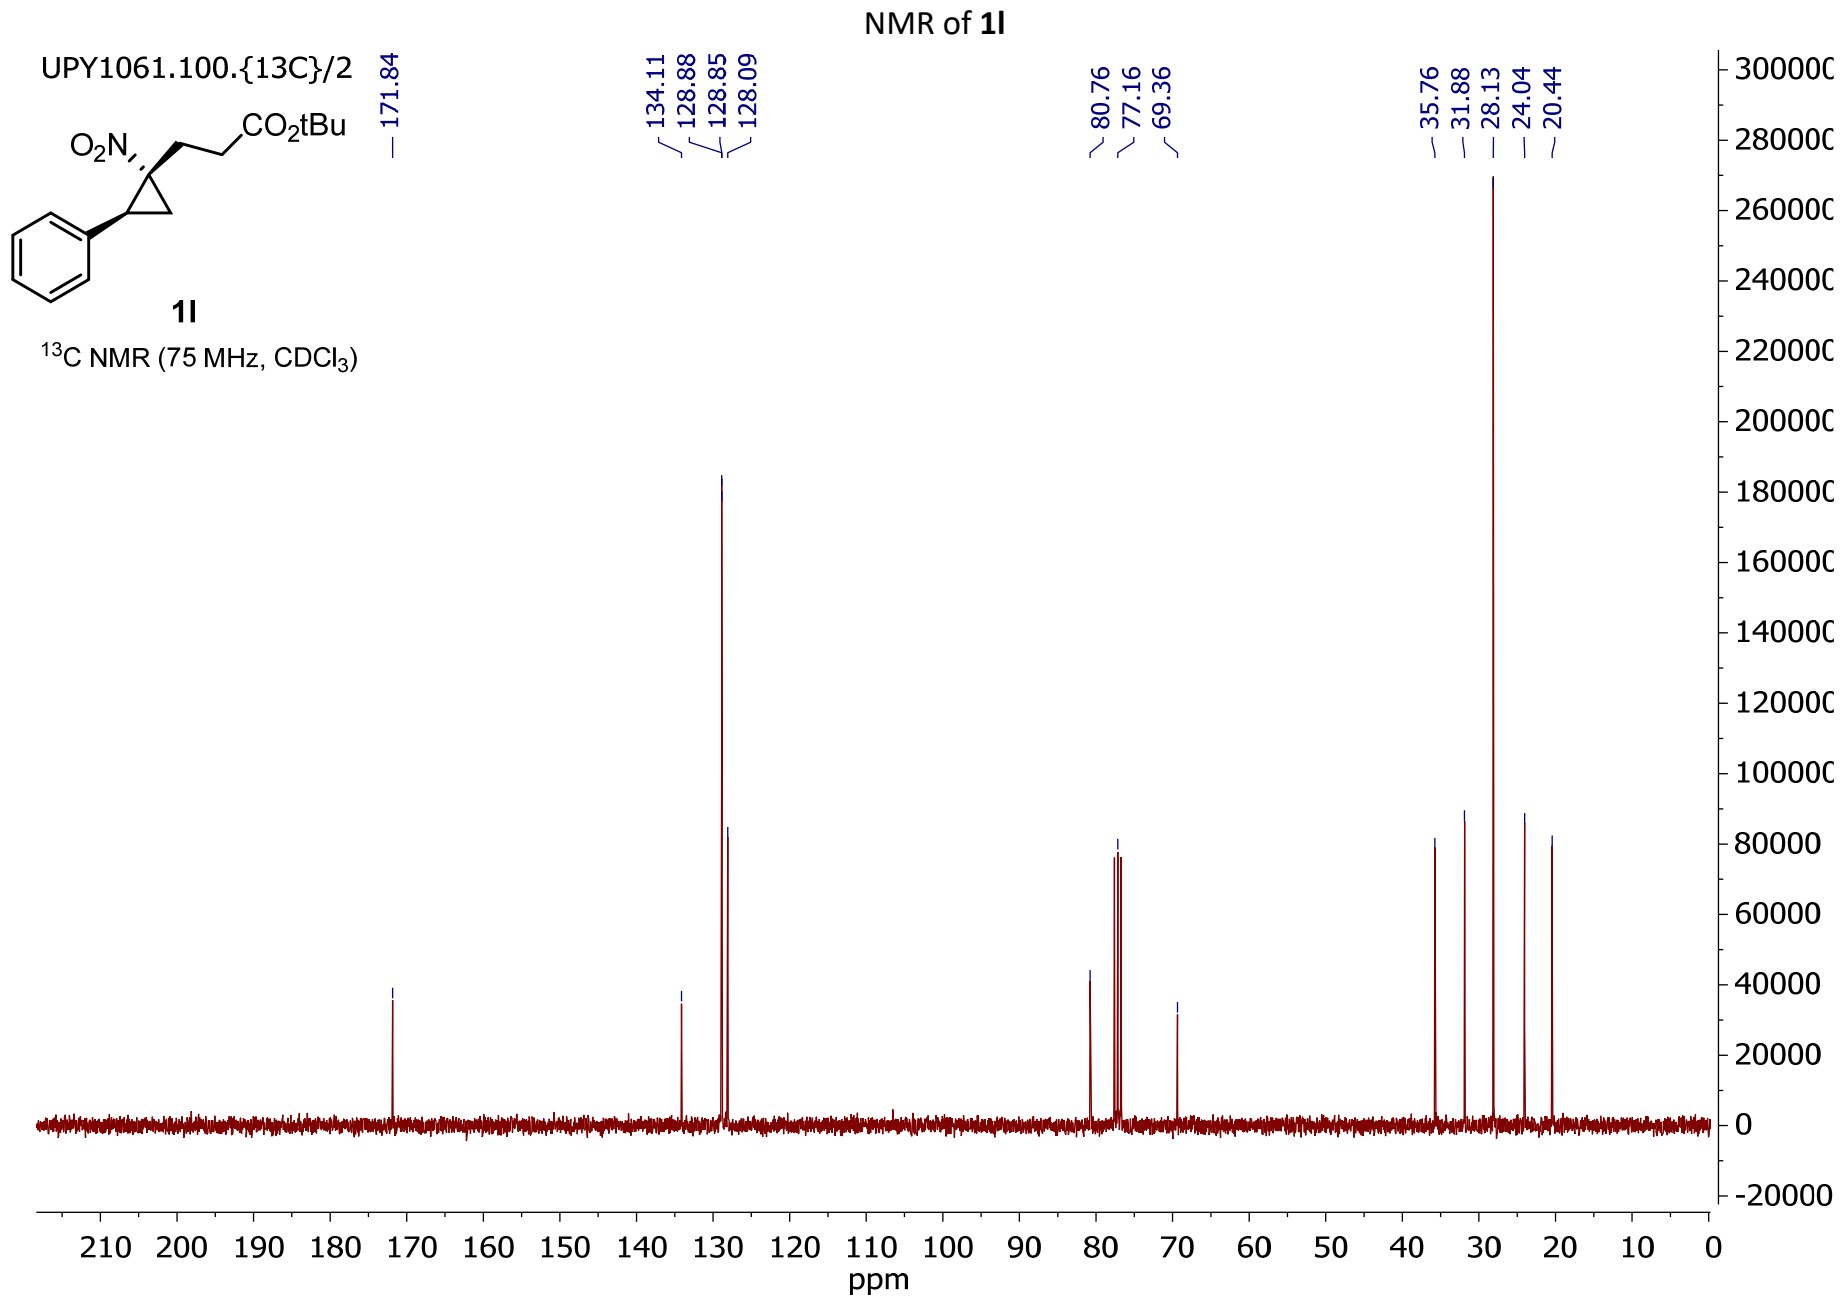

NMR of **11**

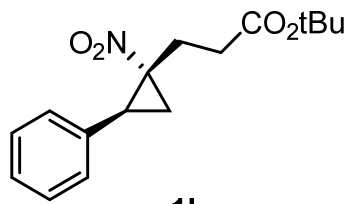

**11**

$^{13}\text{C}$  DEPT NMR  
(75 MHz,  $\text{CDCl}_3$ )

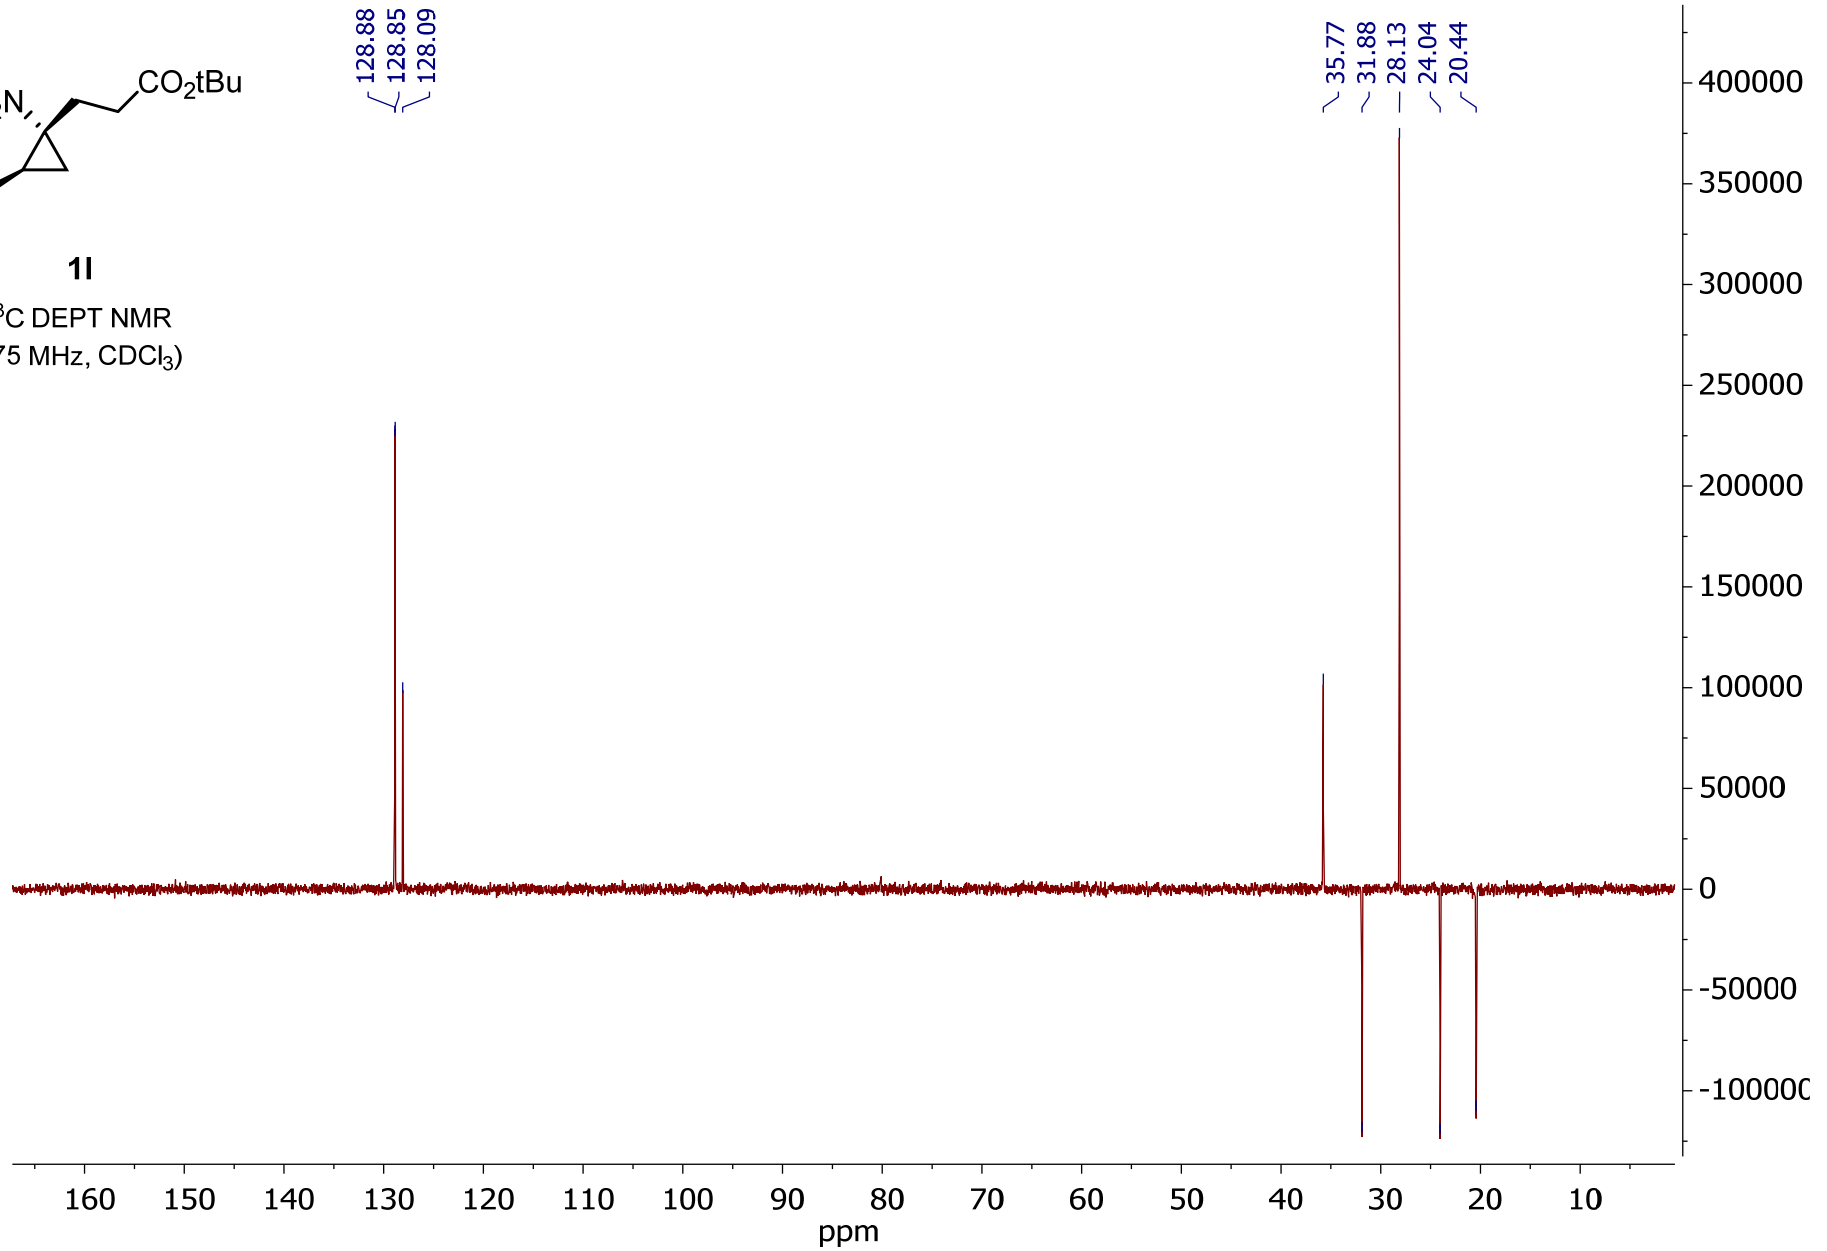

# NMR of 11

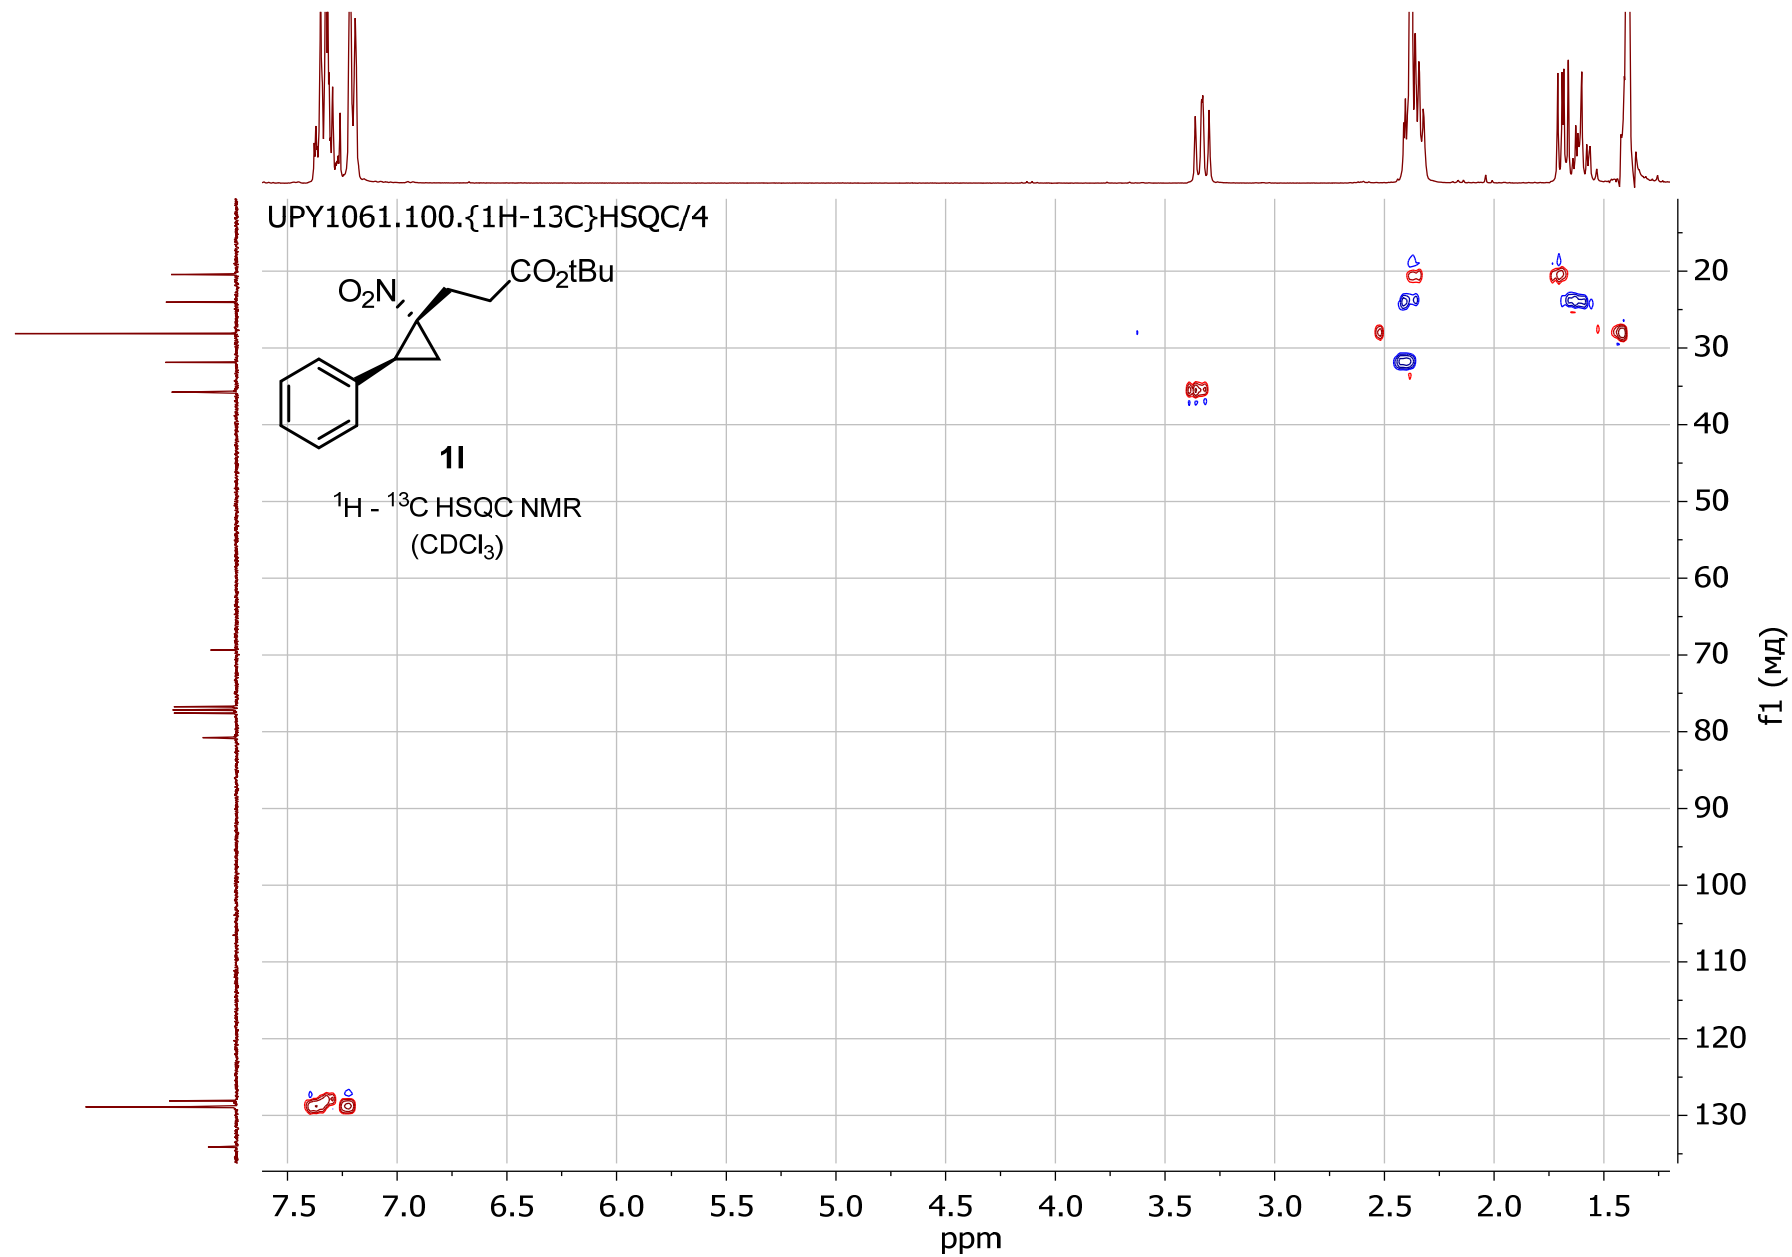

# FTIR (ATR) of **11**

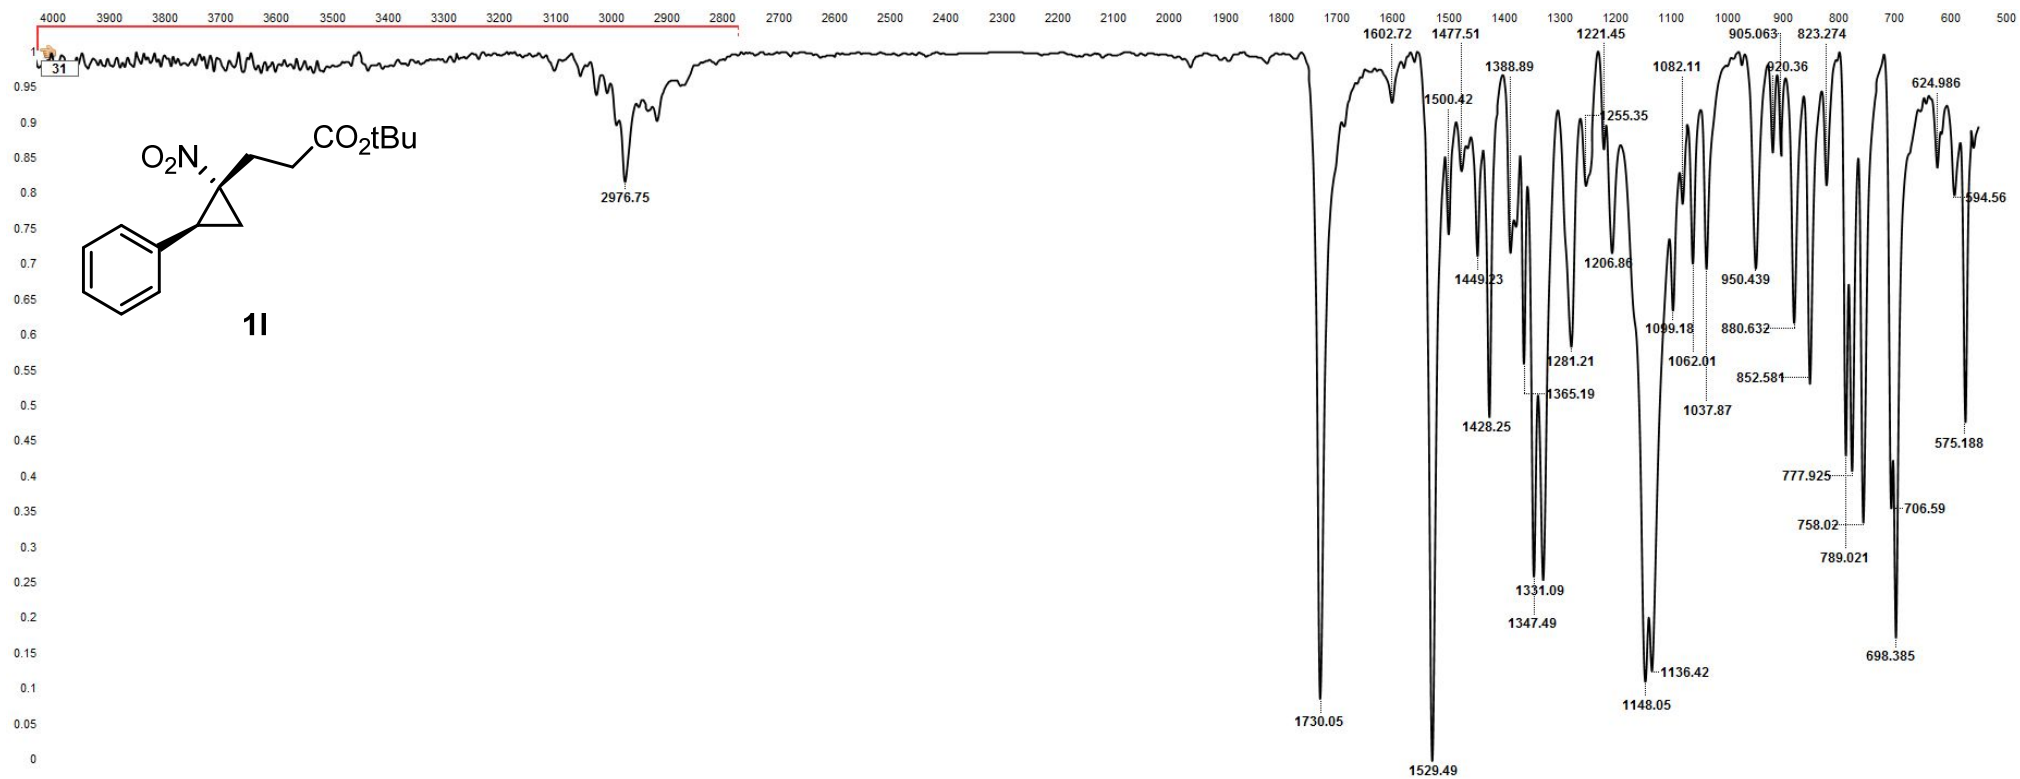

UPY966.101.{1H}/1

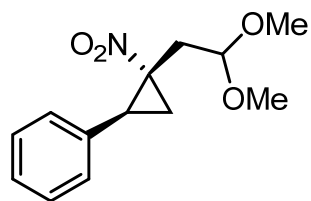

**1m**

<sup>1</sup>H NMR (300 MHz, CDCl<sub>3</sub>)

NMR of **1m**

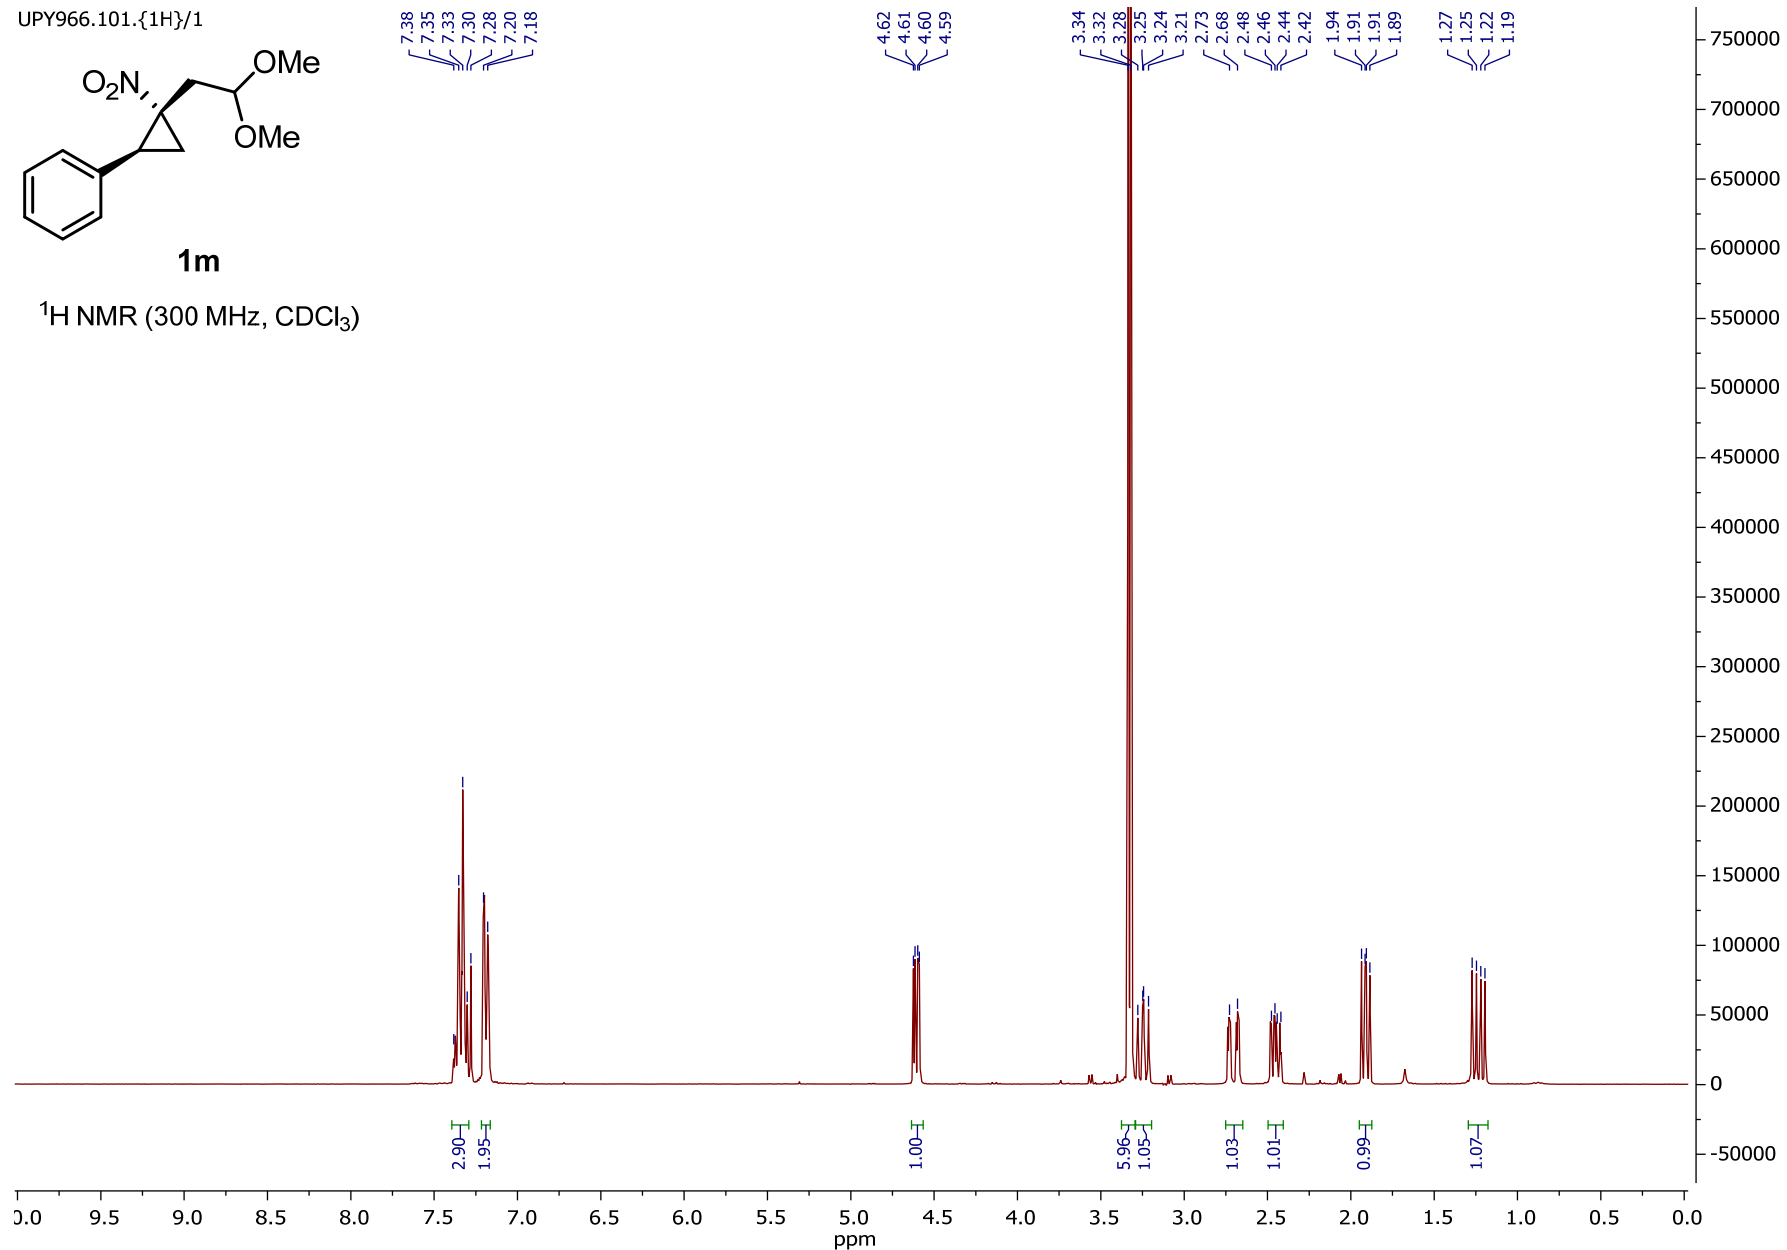

NMR of **1m**

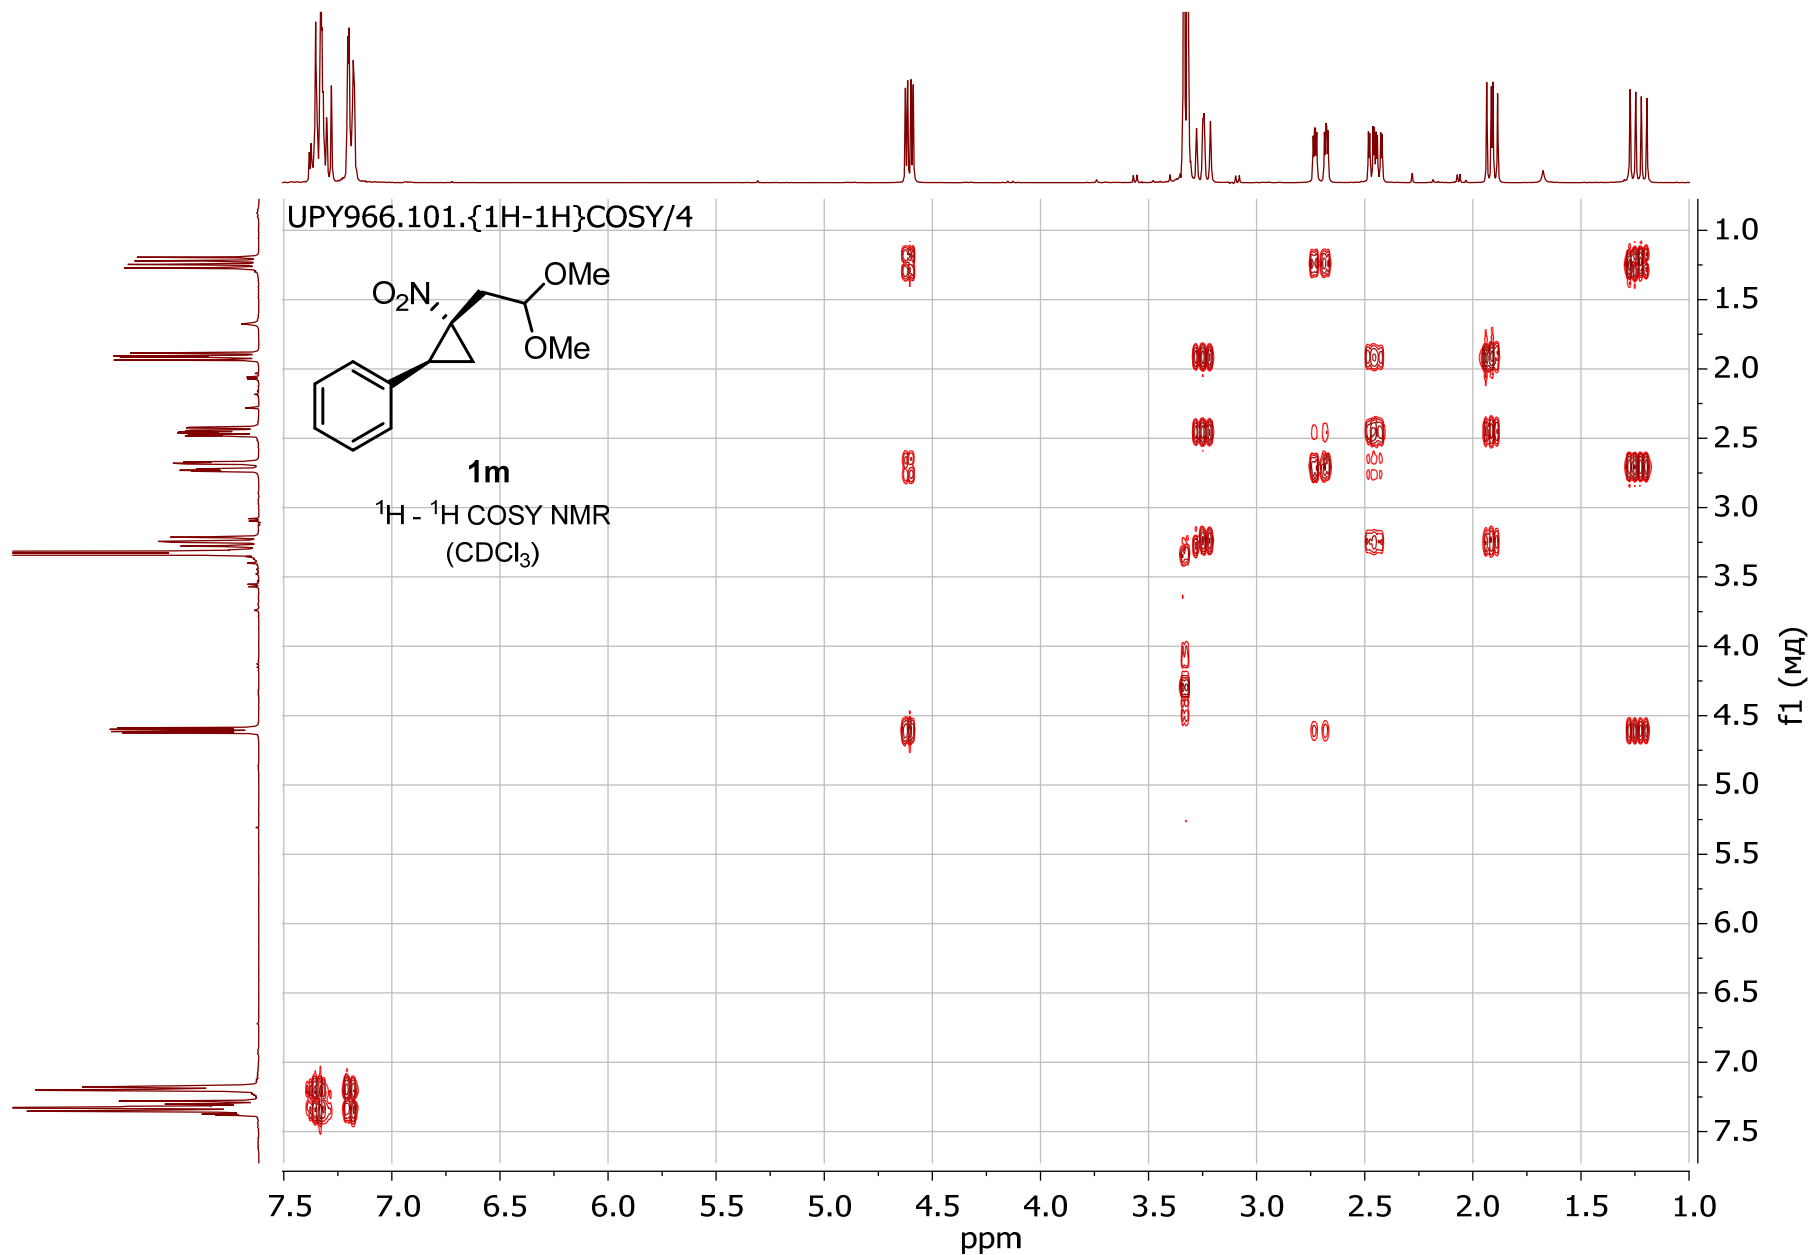



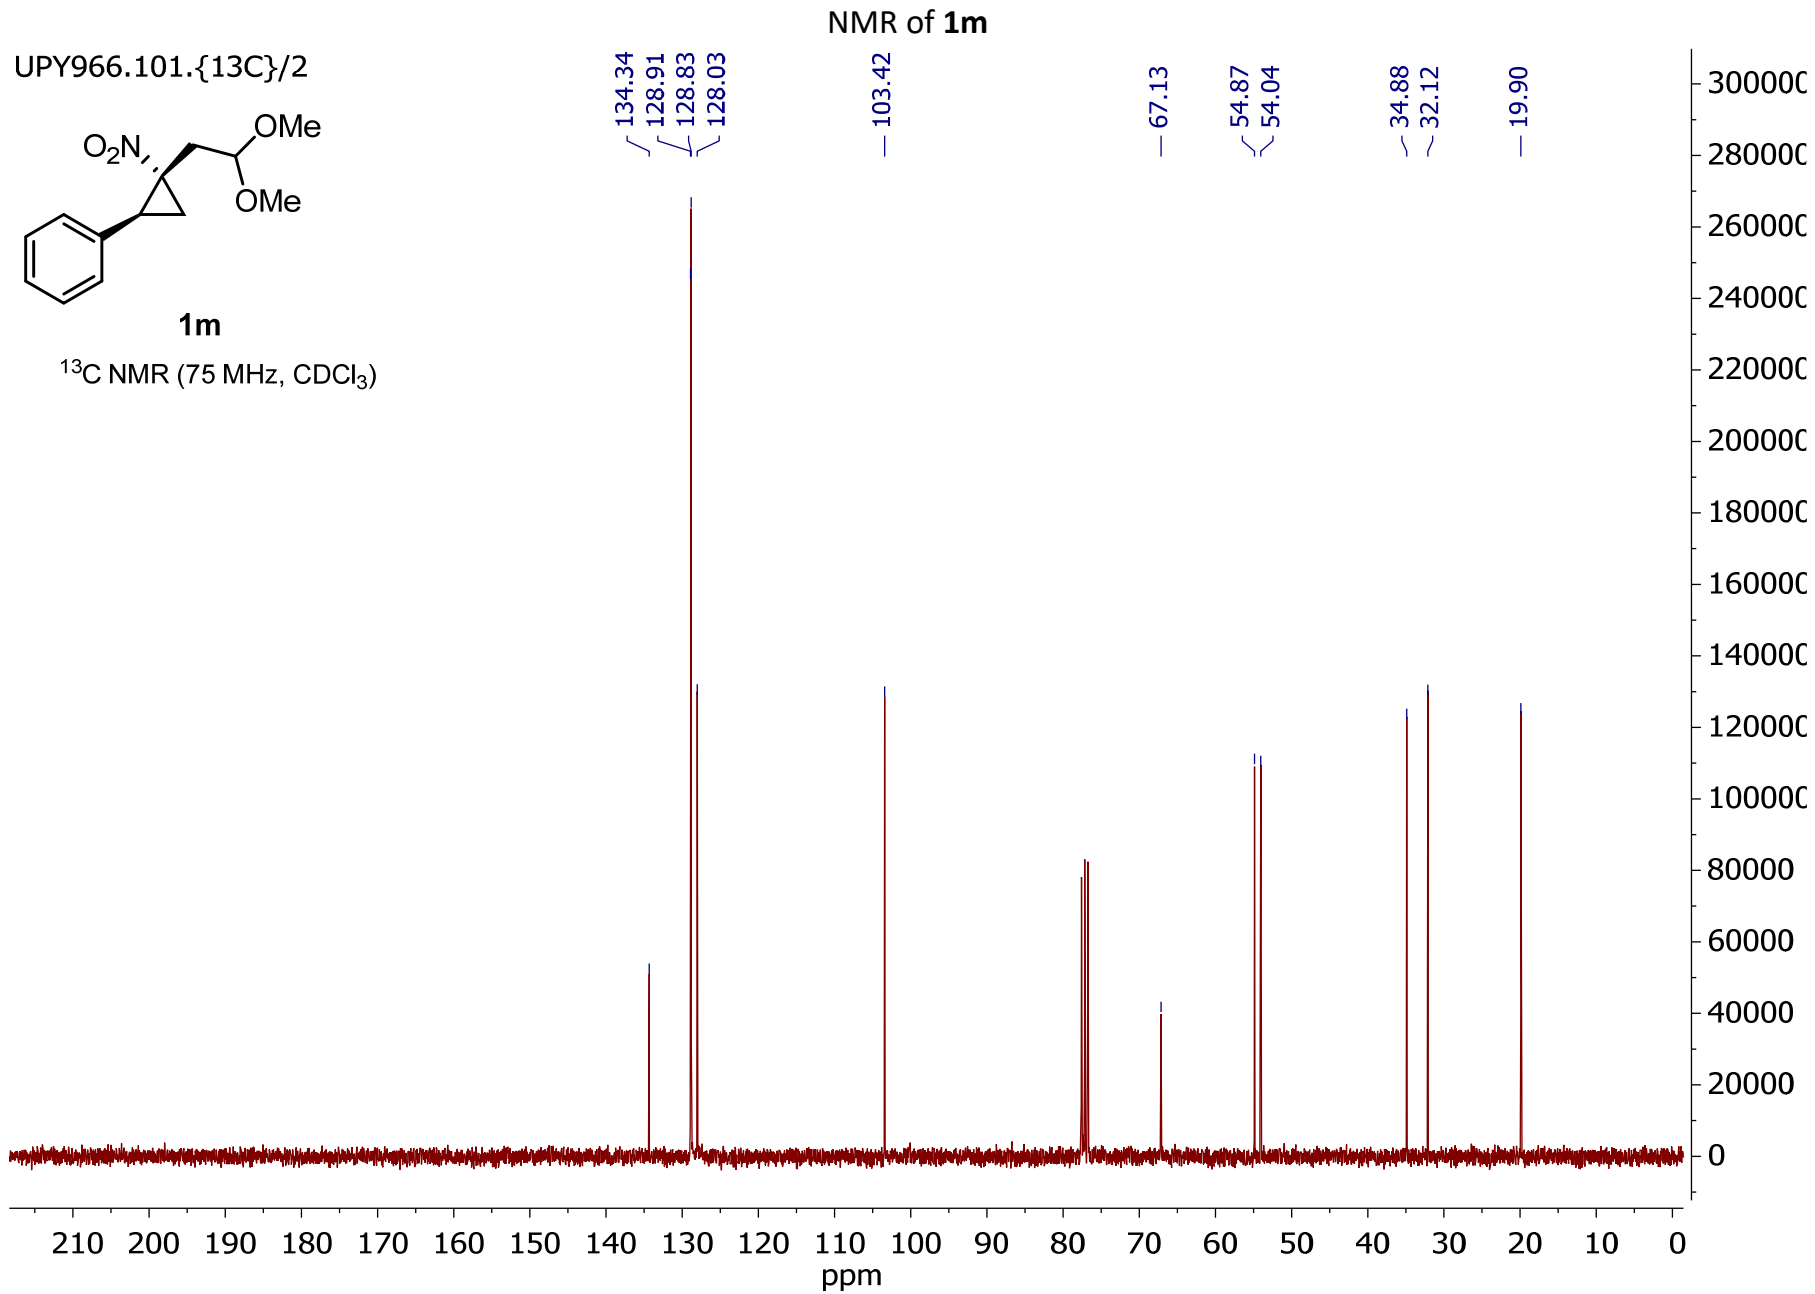

UPY966.101.{13C}depts135/3

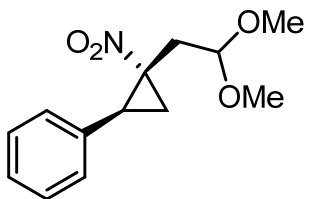

**1m**

<sup>13</sup>C DEPT NMR  
(75 MHz, CDCl<sub>3</sub>)

NMR of **1m**

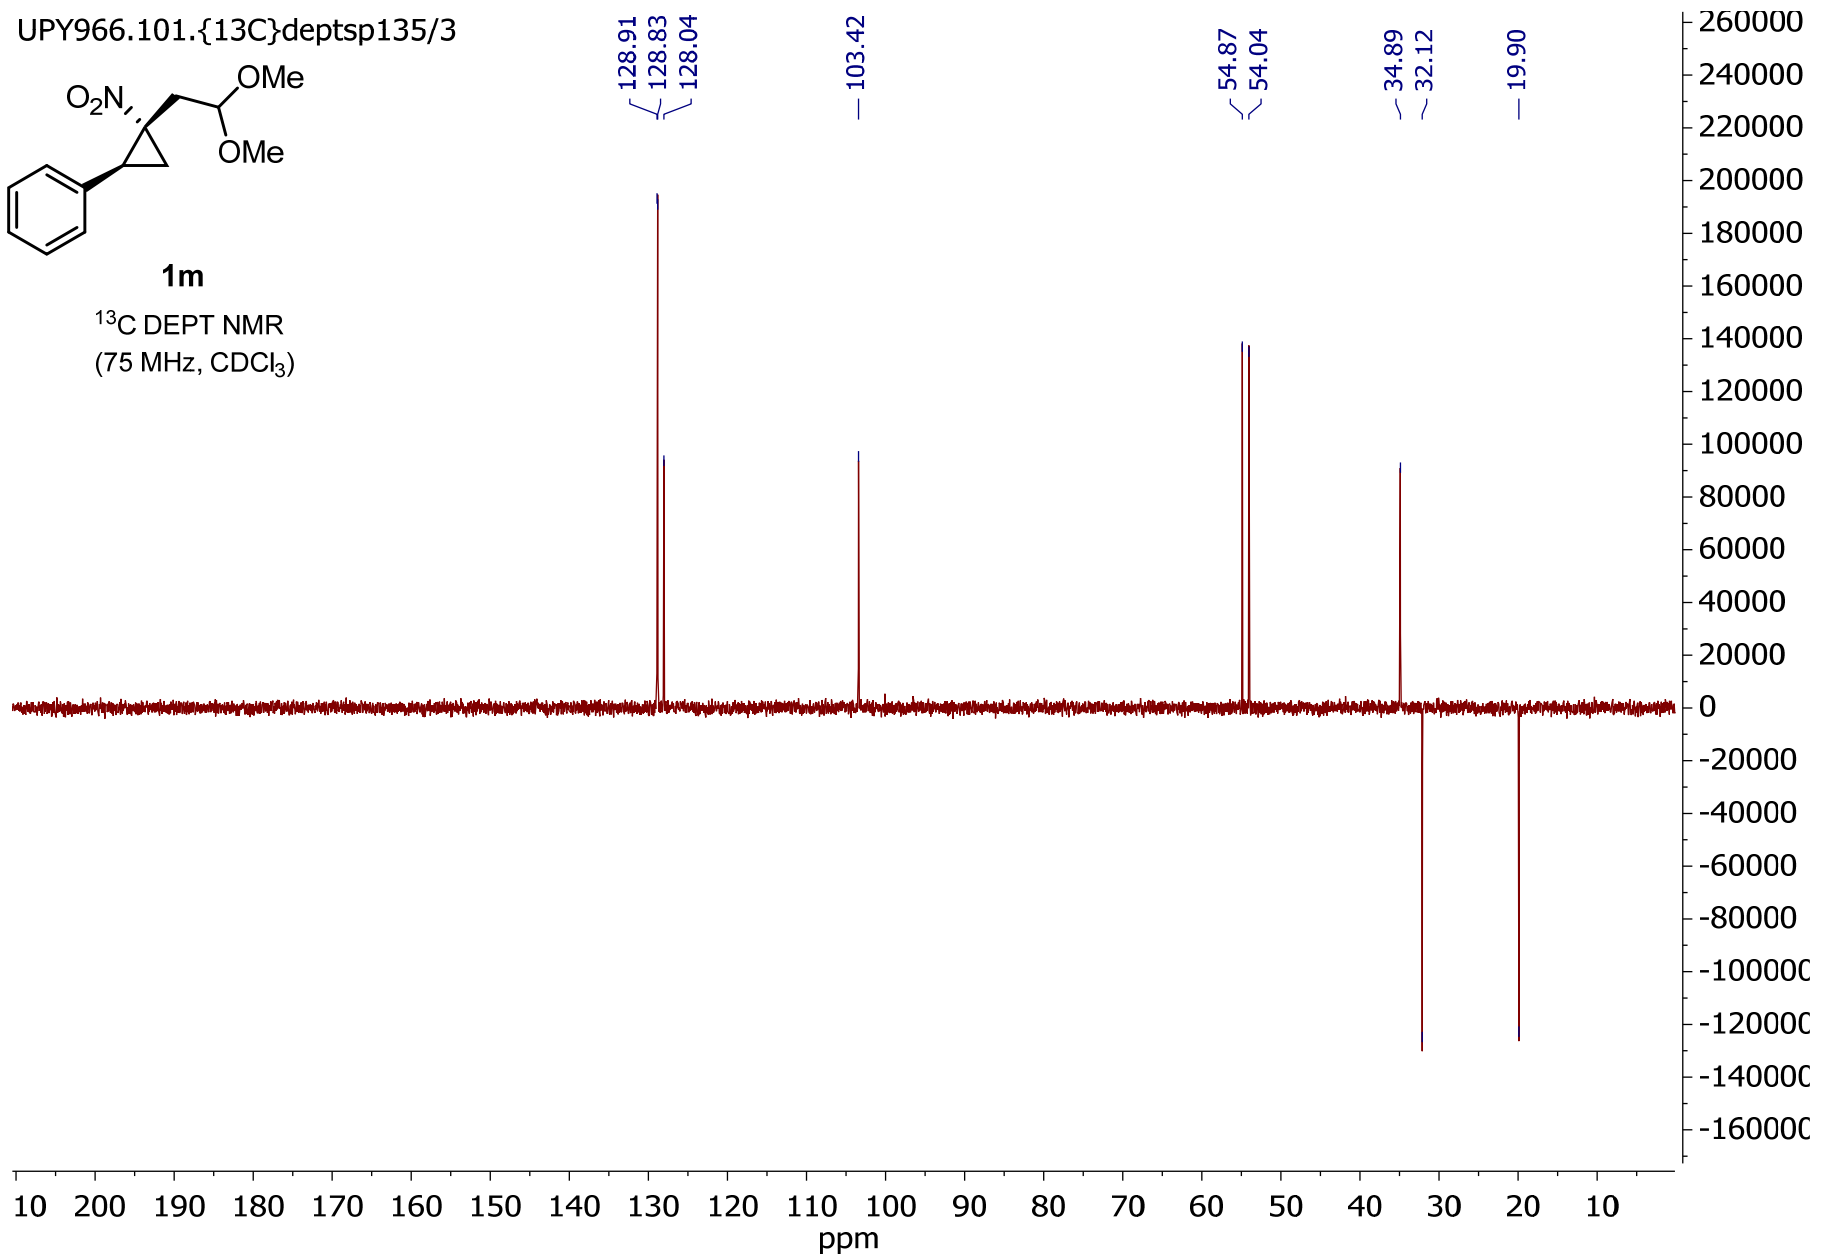

NMR of **1m**

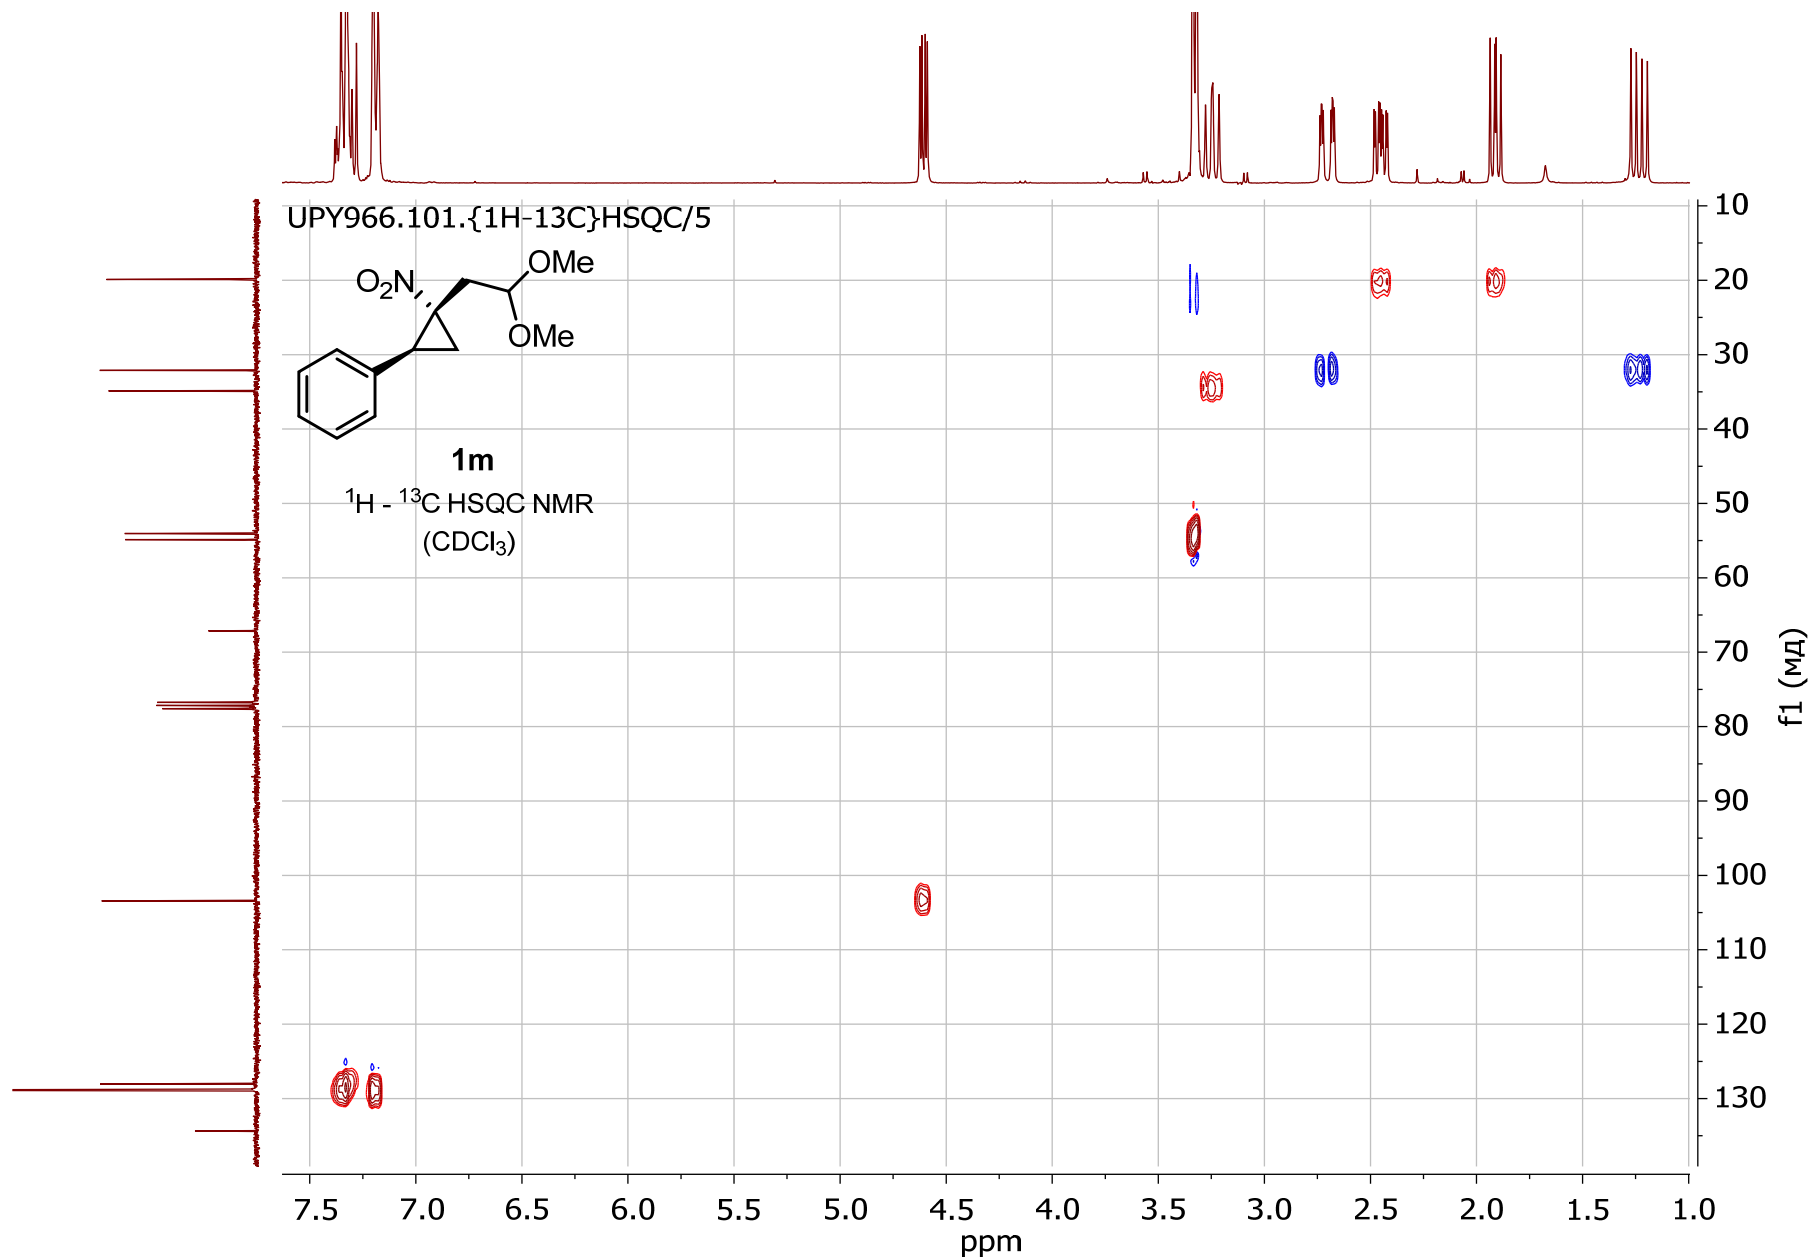

# NMR of 1m

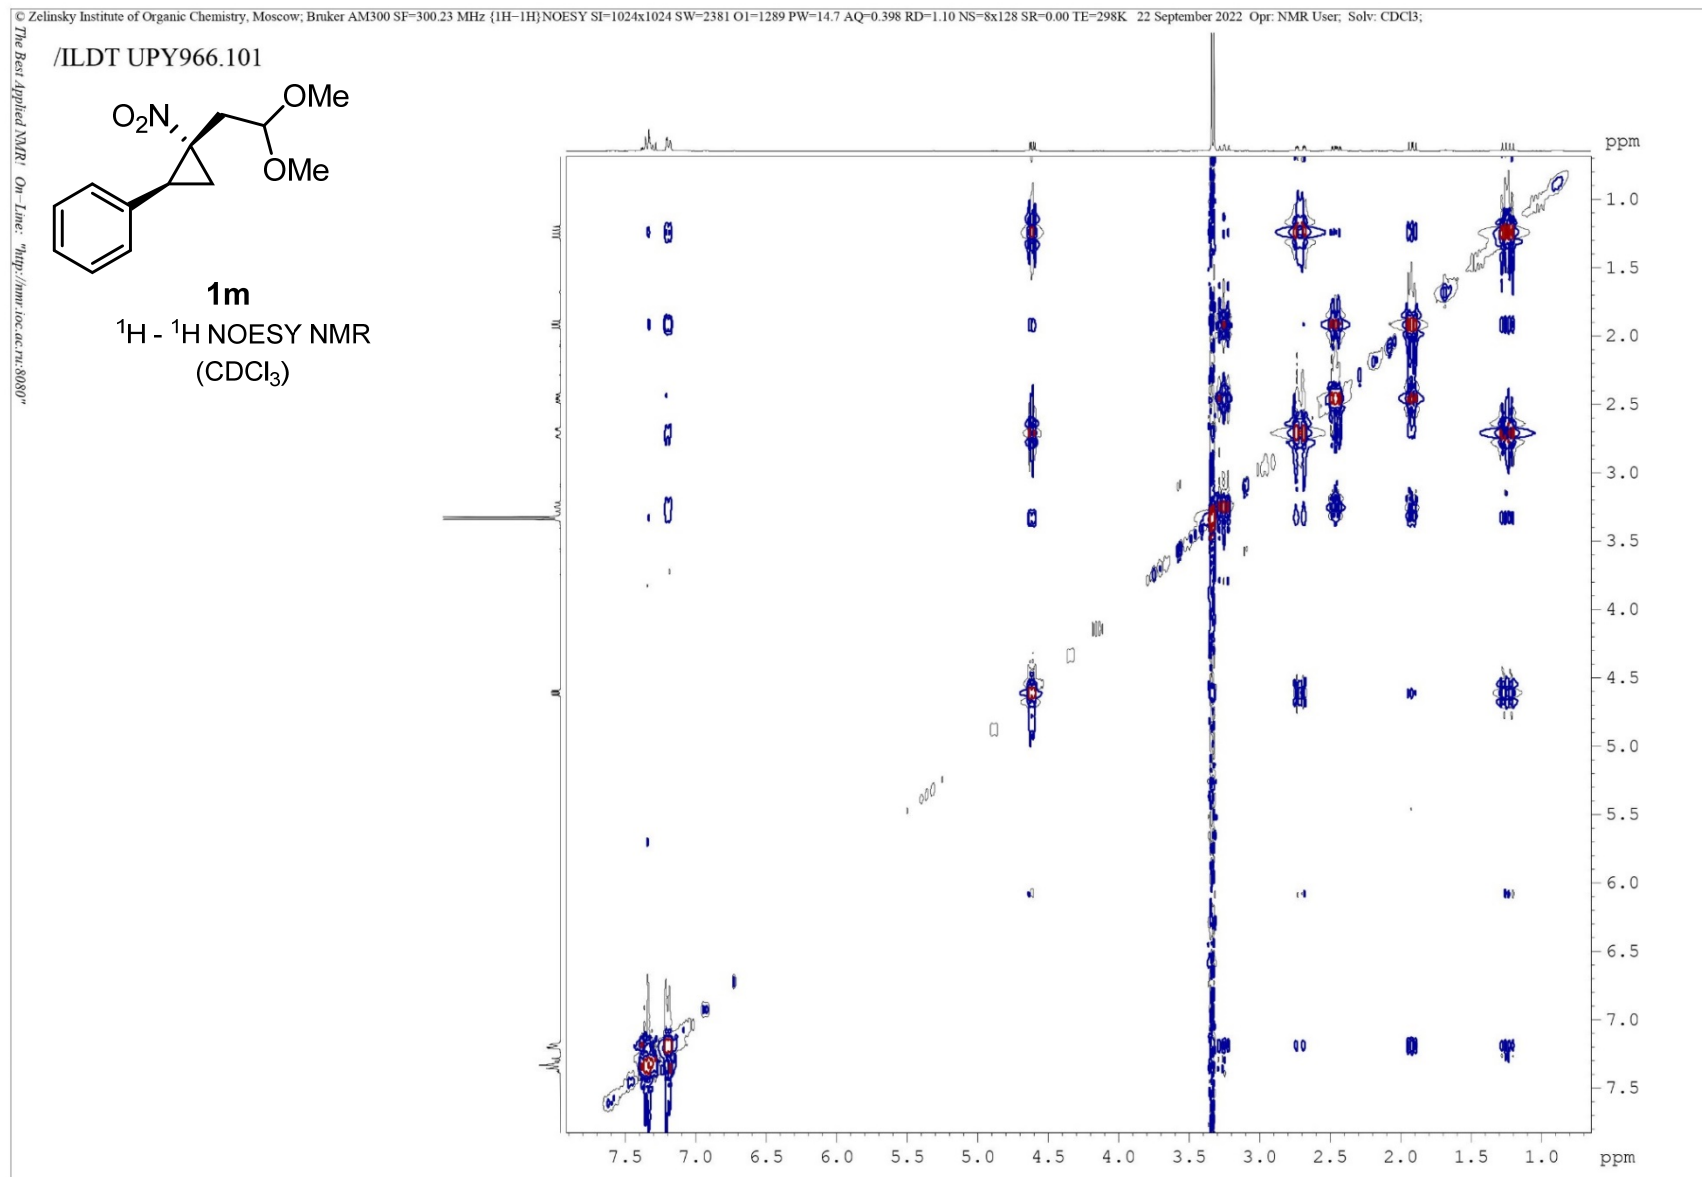

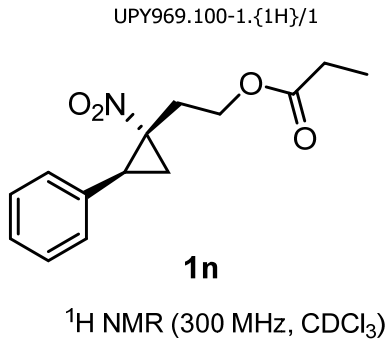

7.41  
7.35  
7.33  
7.28  
7.22  
7.19

NMR of **1n**

4.32  
4.28  
4.24  
4.20  
4.16  
4.12

3.37  
3.34  
3.33  
3.30

2.67  
2.66  
2.62  
2.60  
2.48  
2.46  
2.45  
2.43  
2.32  
2.29  
2.27  
2.24  
1.75  
1.73  
1.72  
1.70  
1.49  
1.47  
1.45  
1.44  
1.42  
1.40  
1.14  
1.12  
1.09

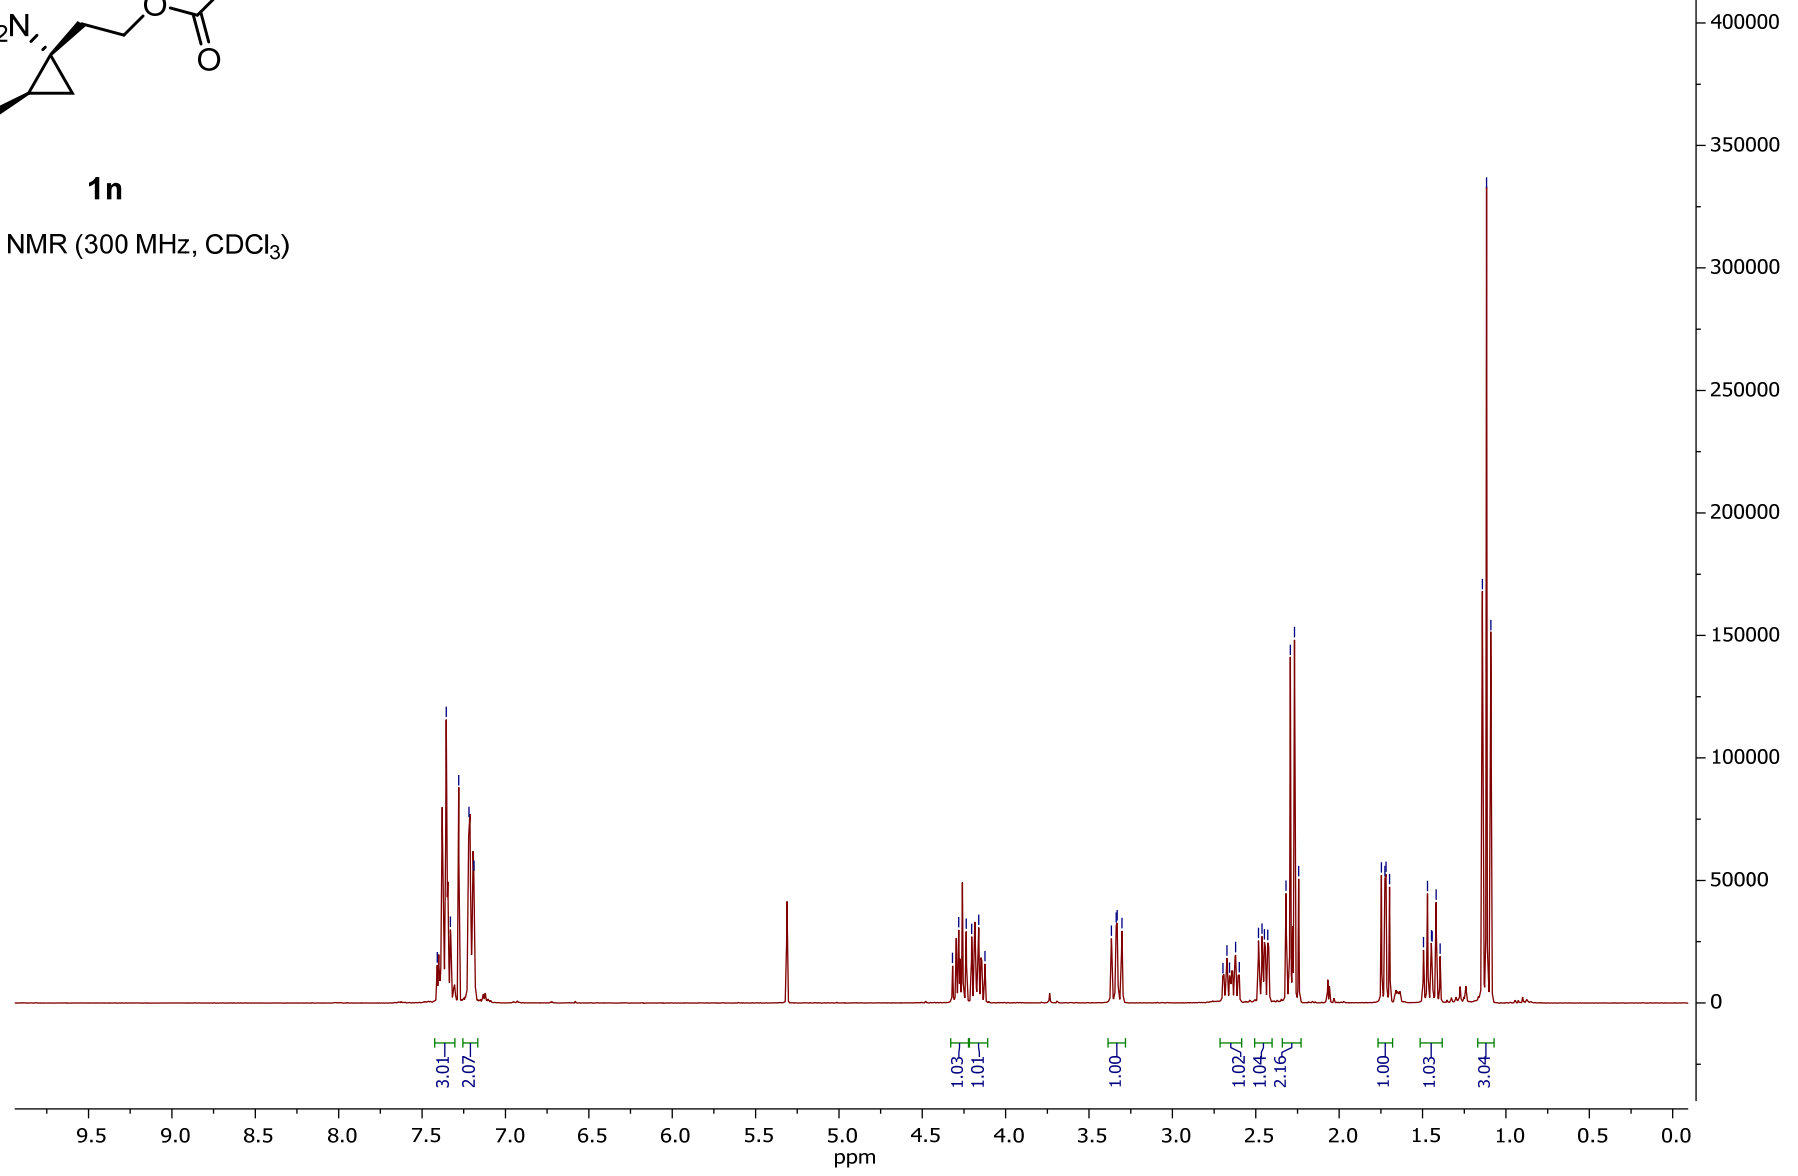

NMR of **1n**

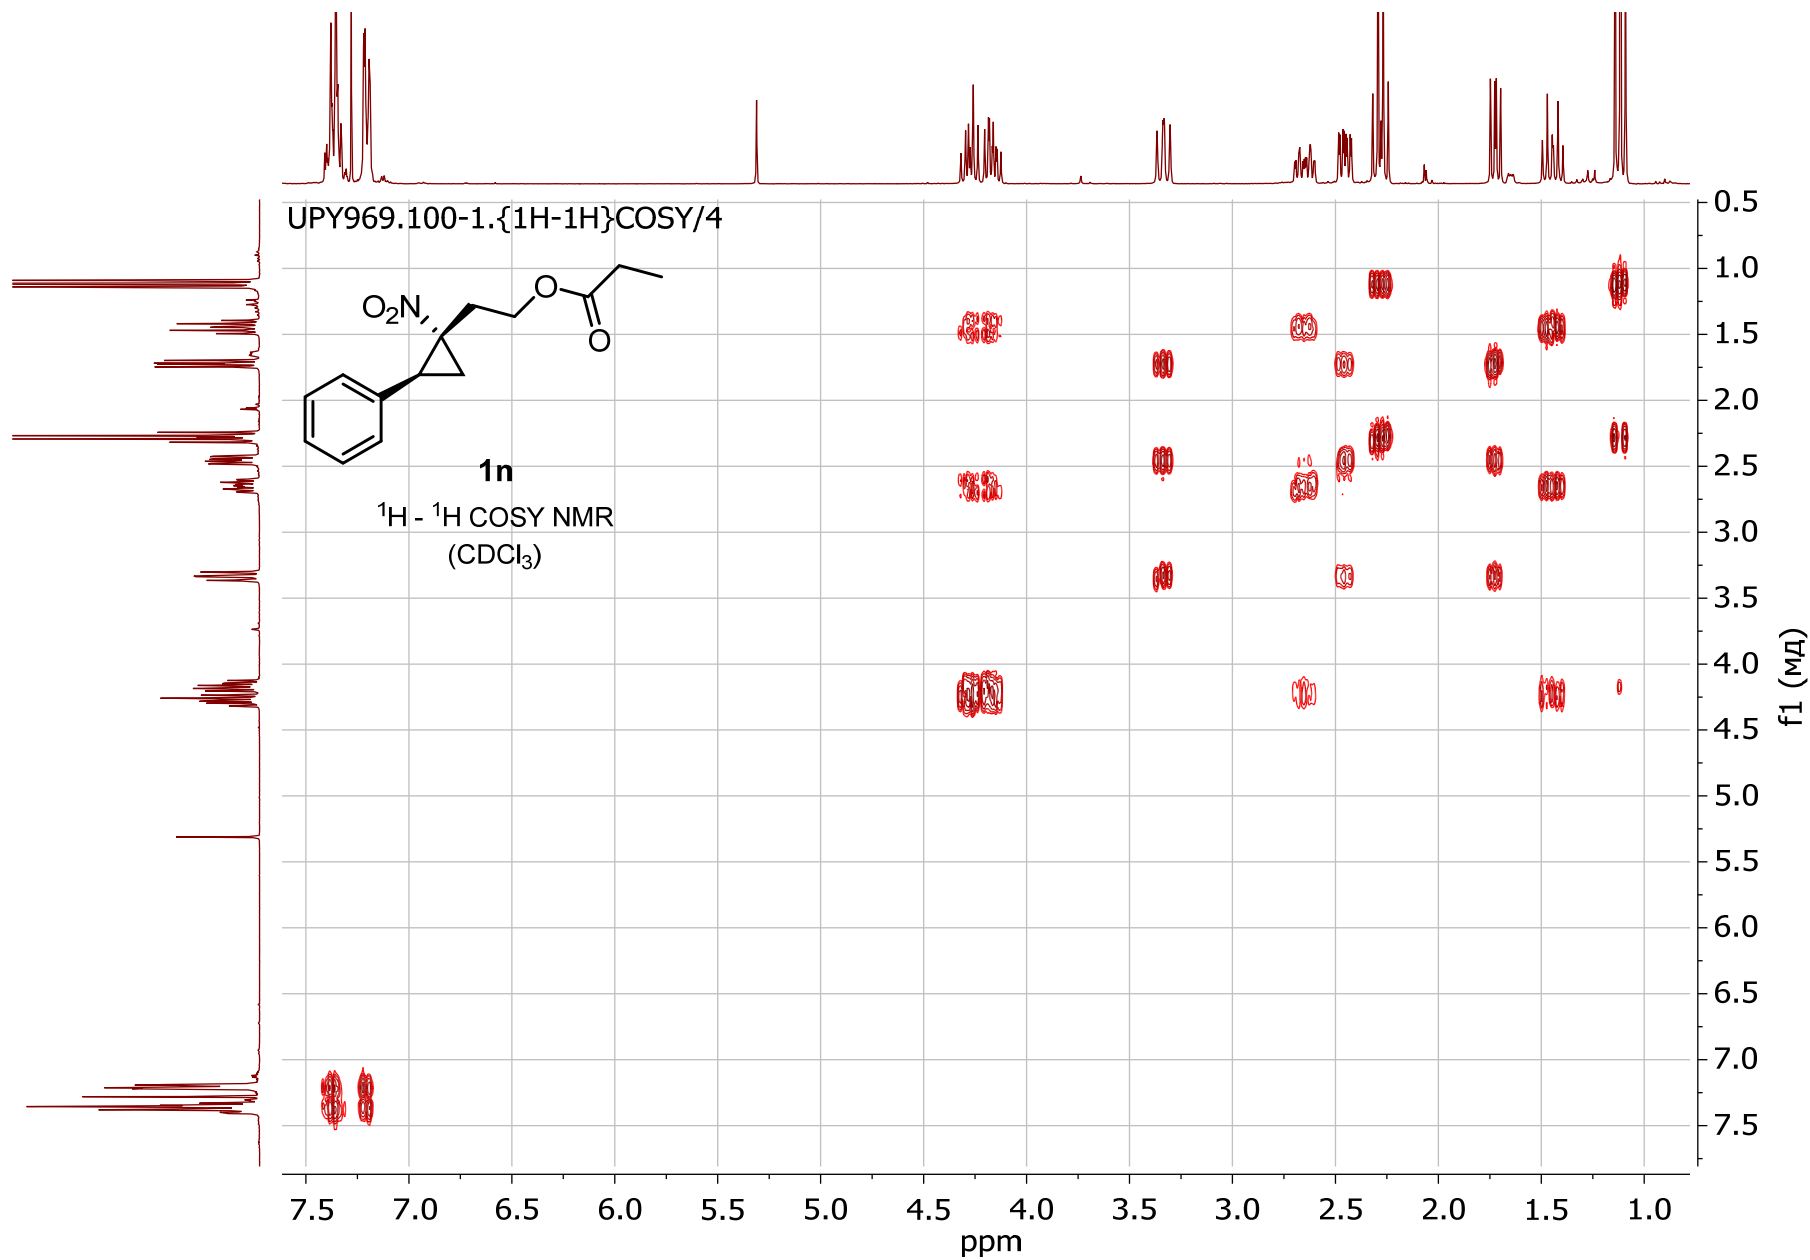

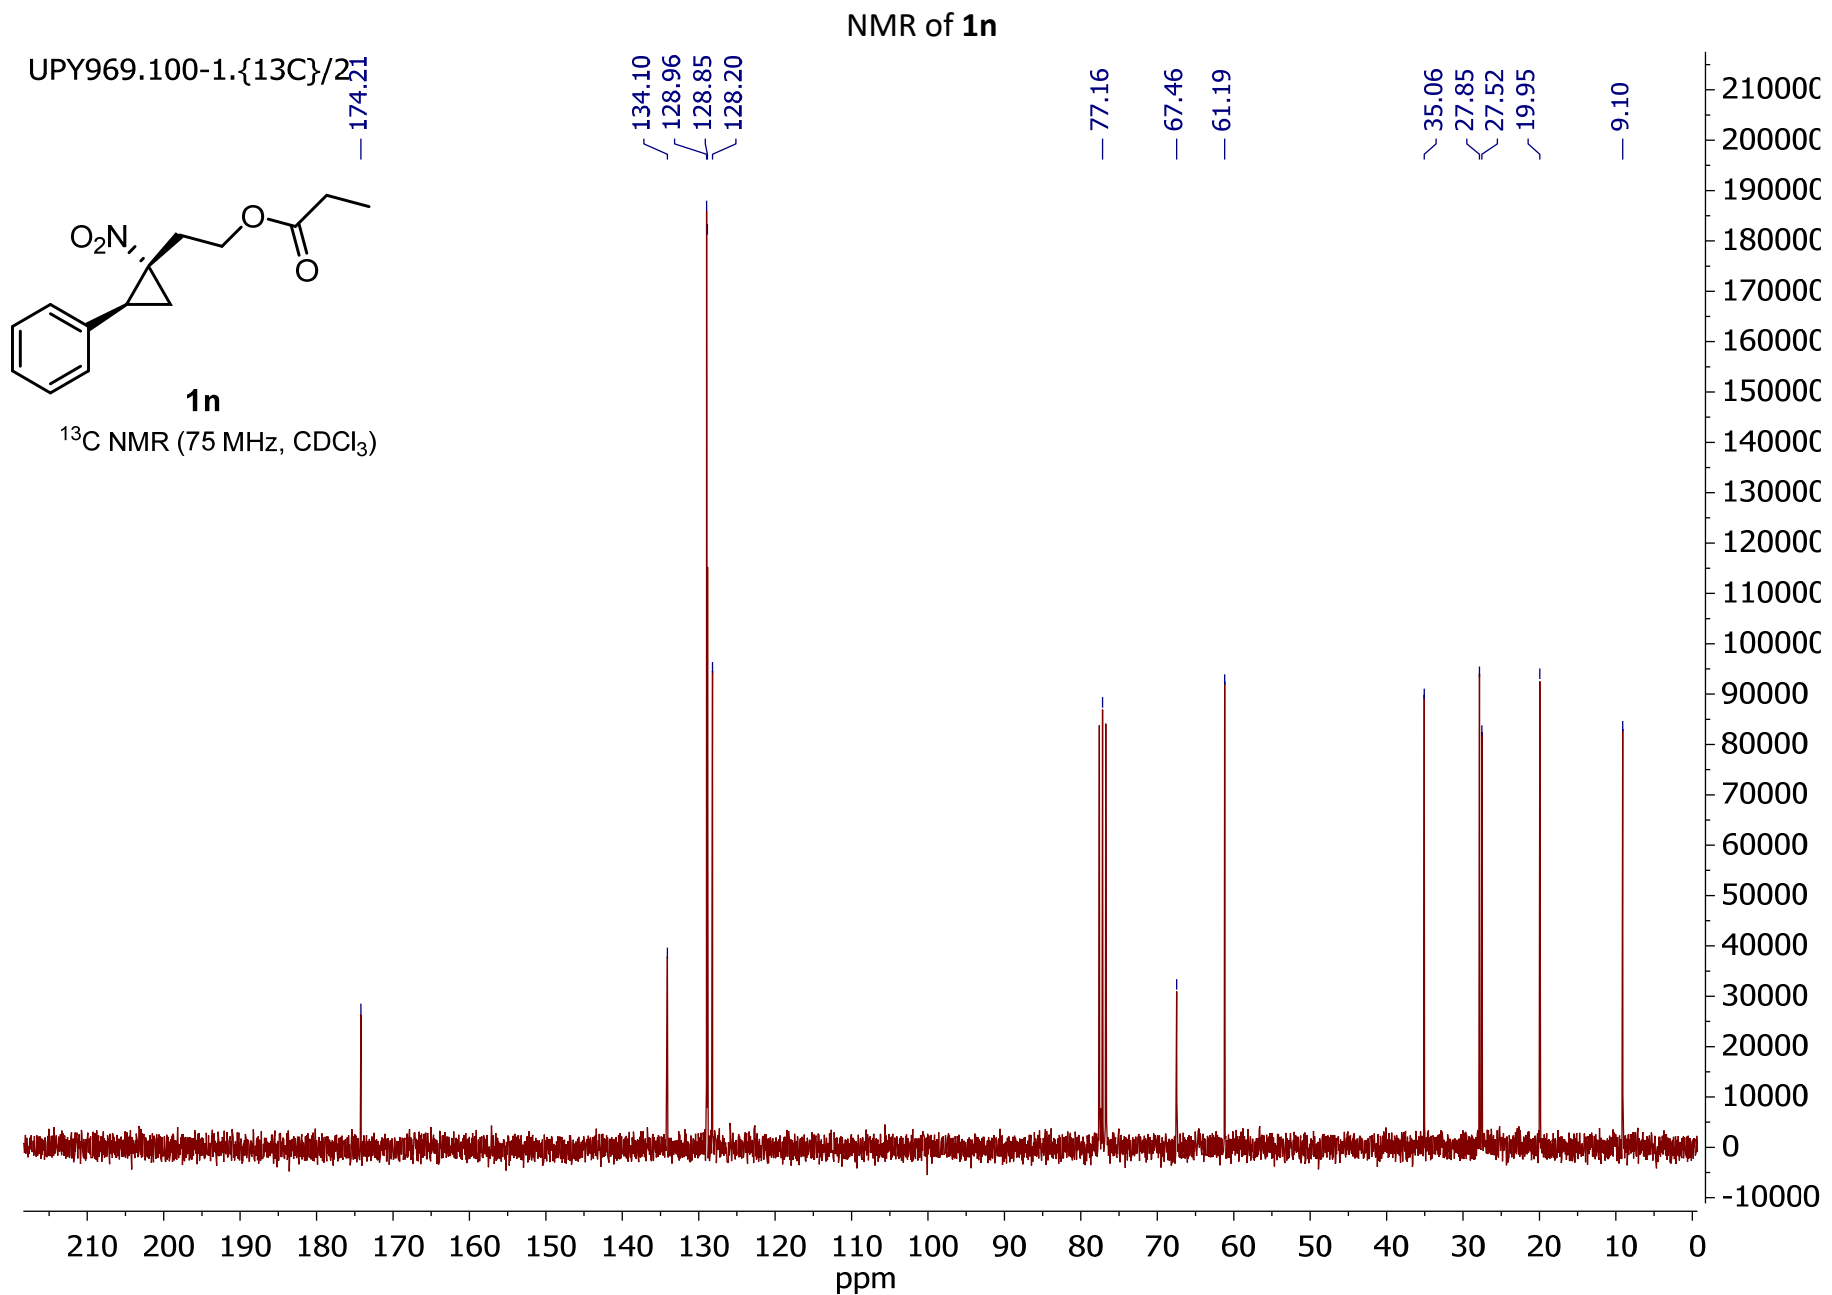

NMR of **1n**

UPY969.100-1.<sup>13</sup>C}depts135/3

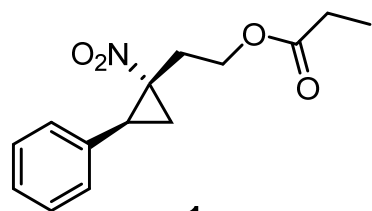

**1n**

<sup>13</sup>C DEPT NMR  
(75 MHz, CDCl<sub>3</sub>)

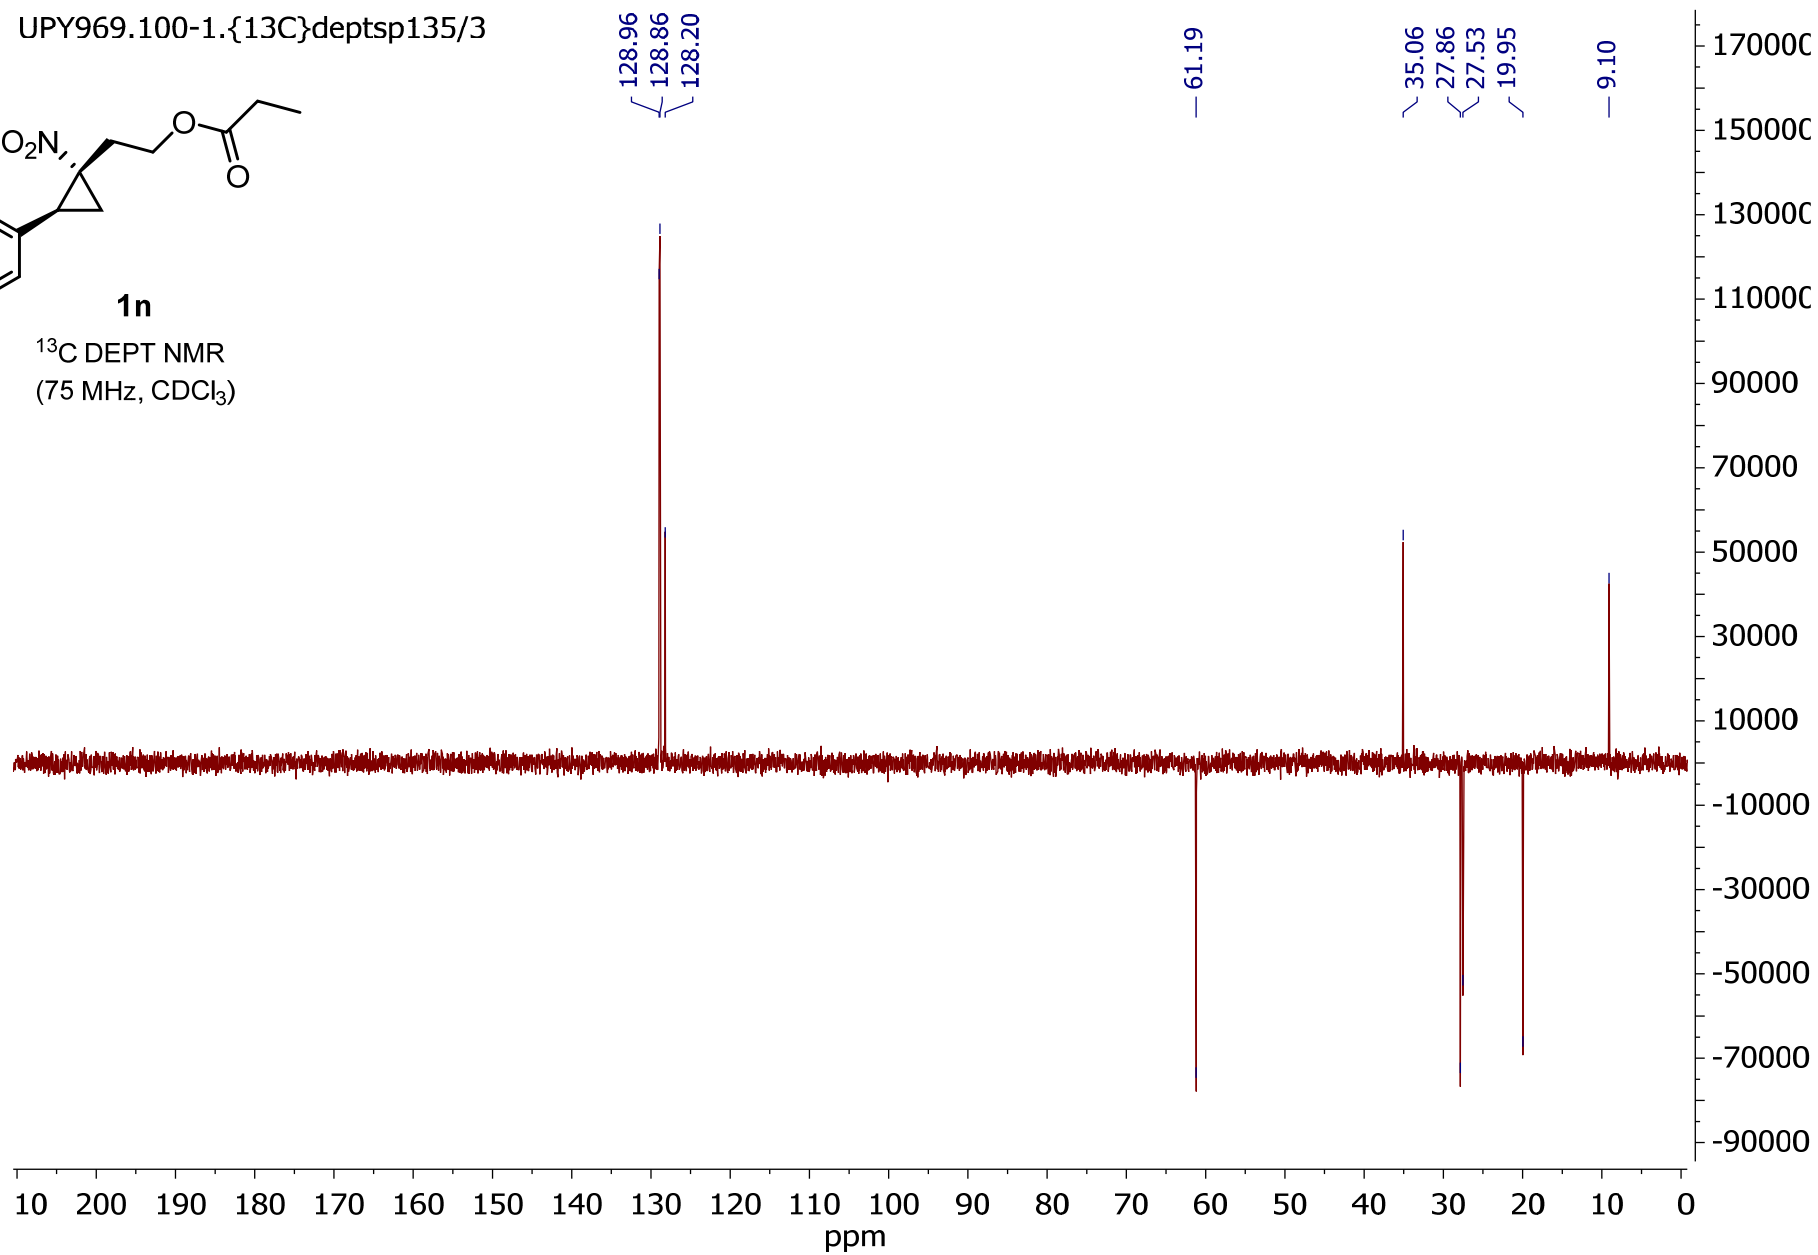



NMR of **1n**

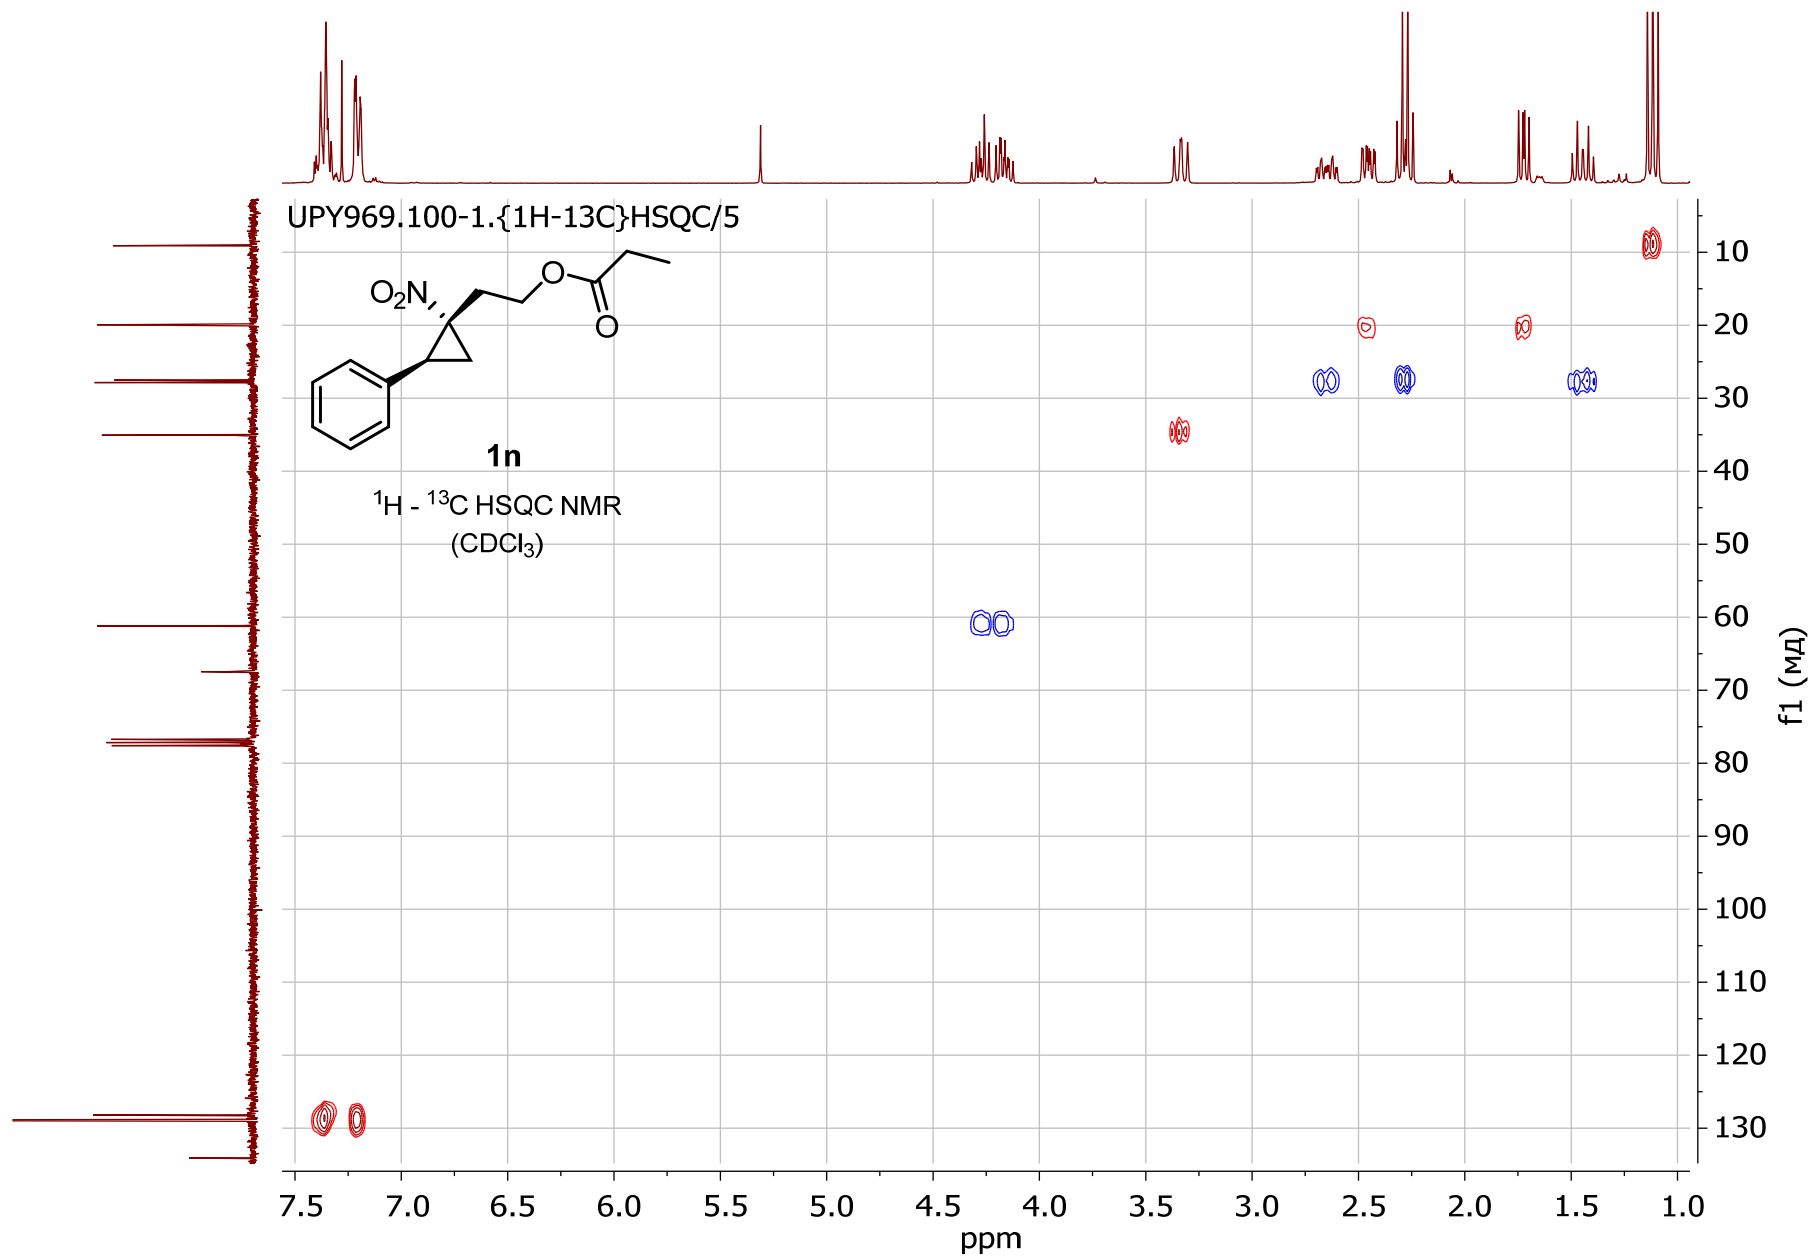

# NMR of 1n

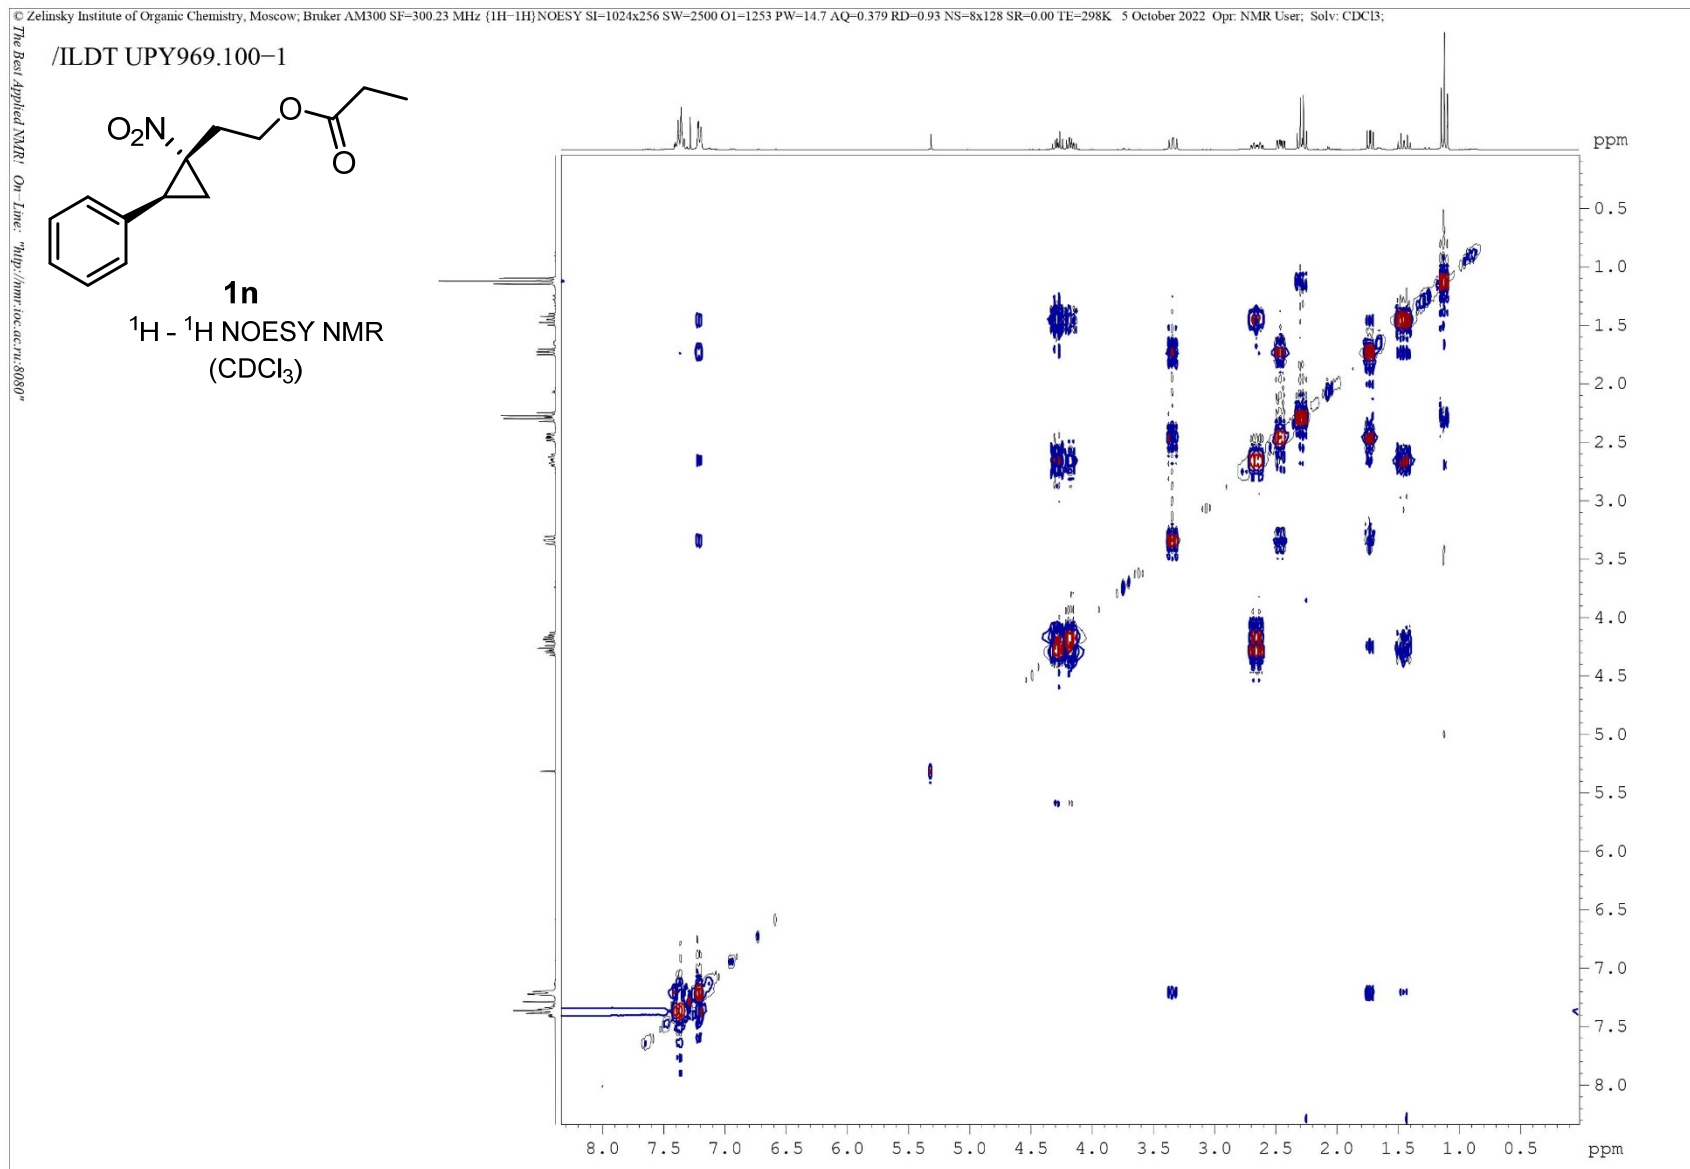

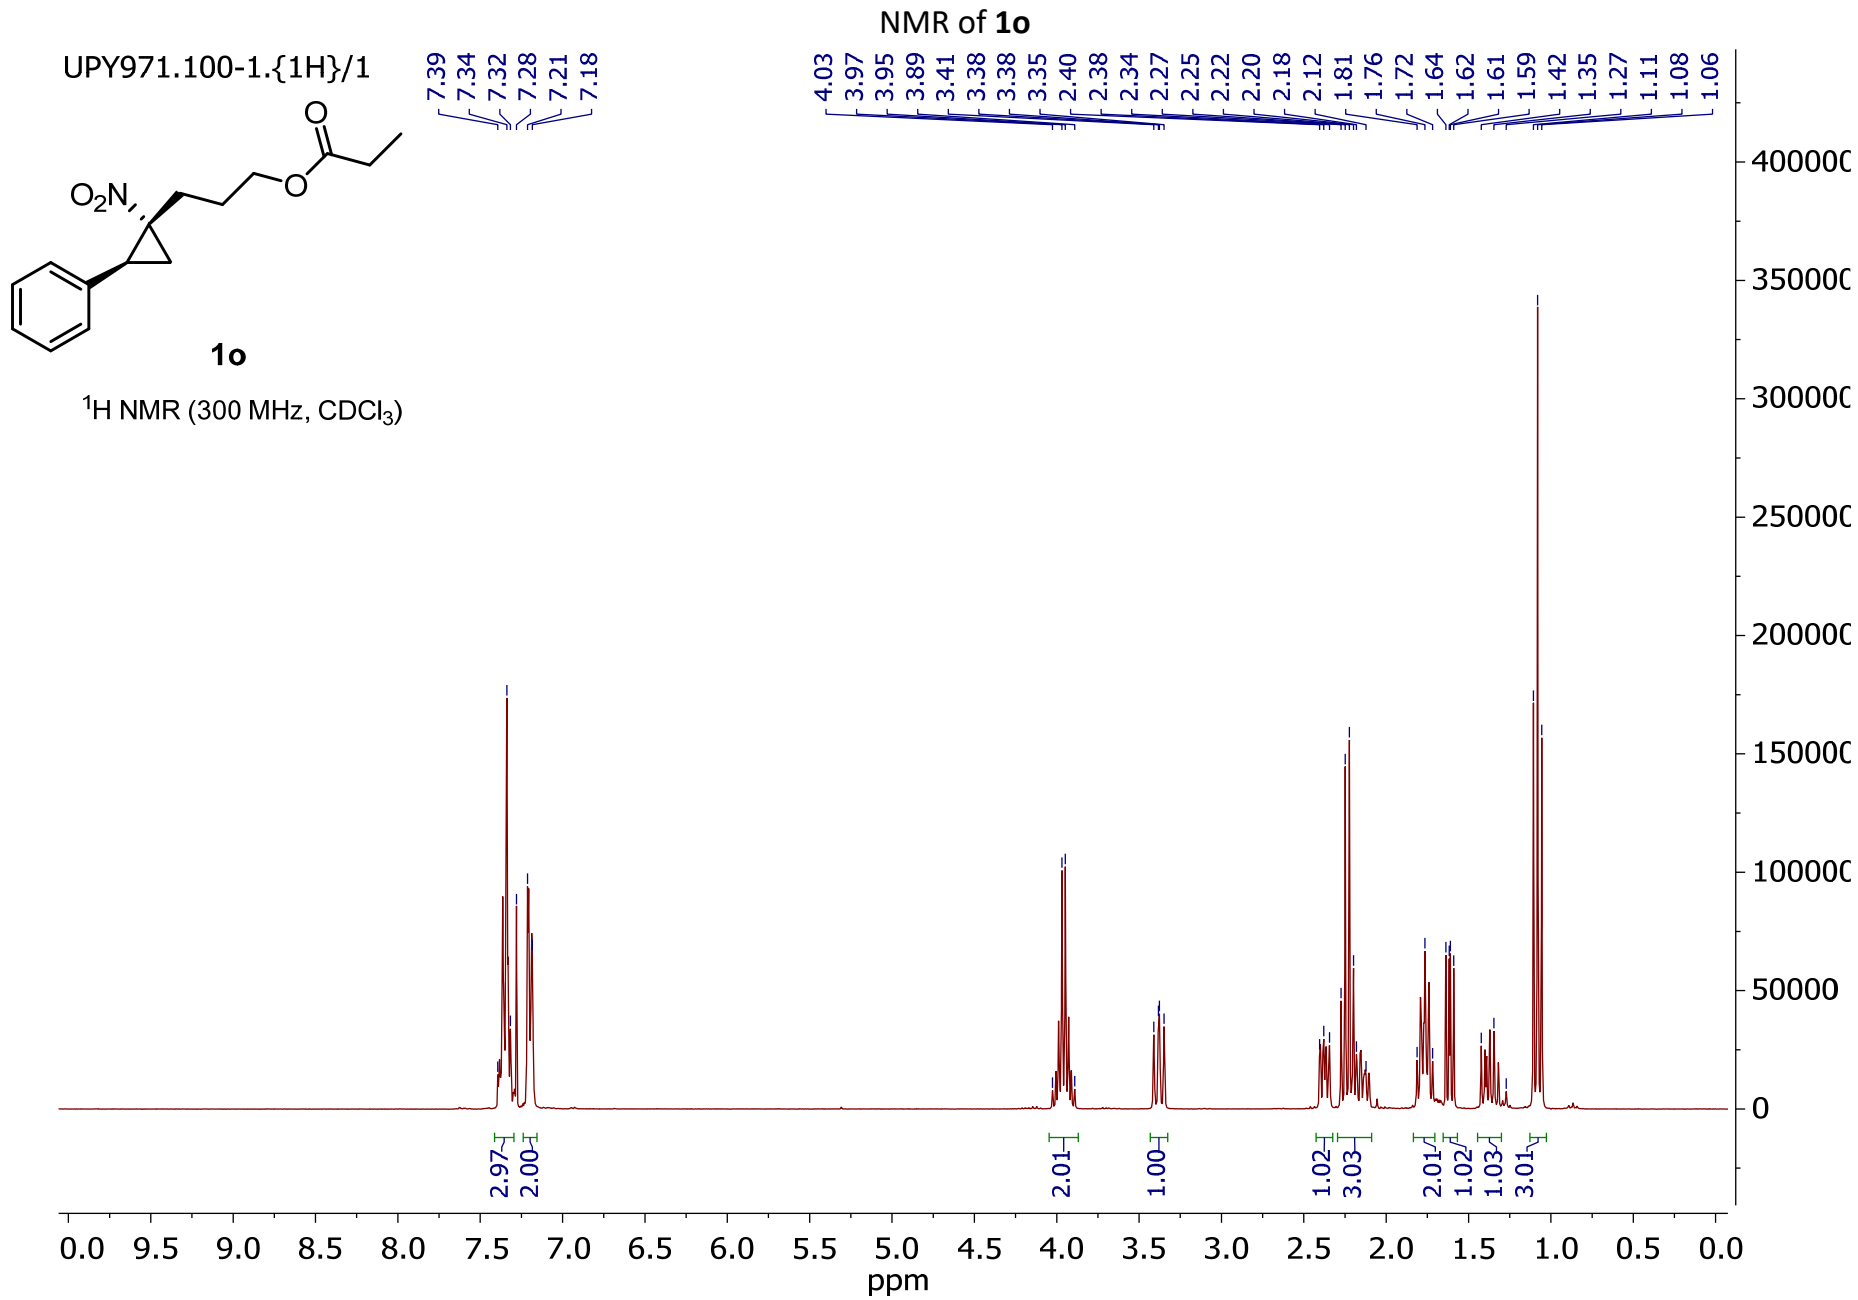

NMR of **1o**

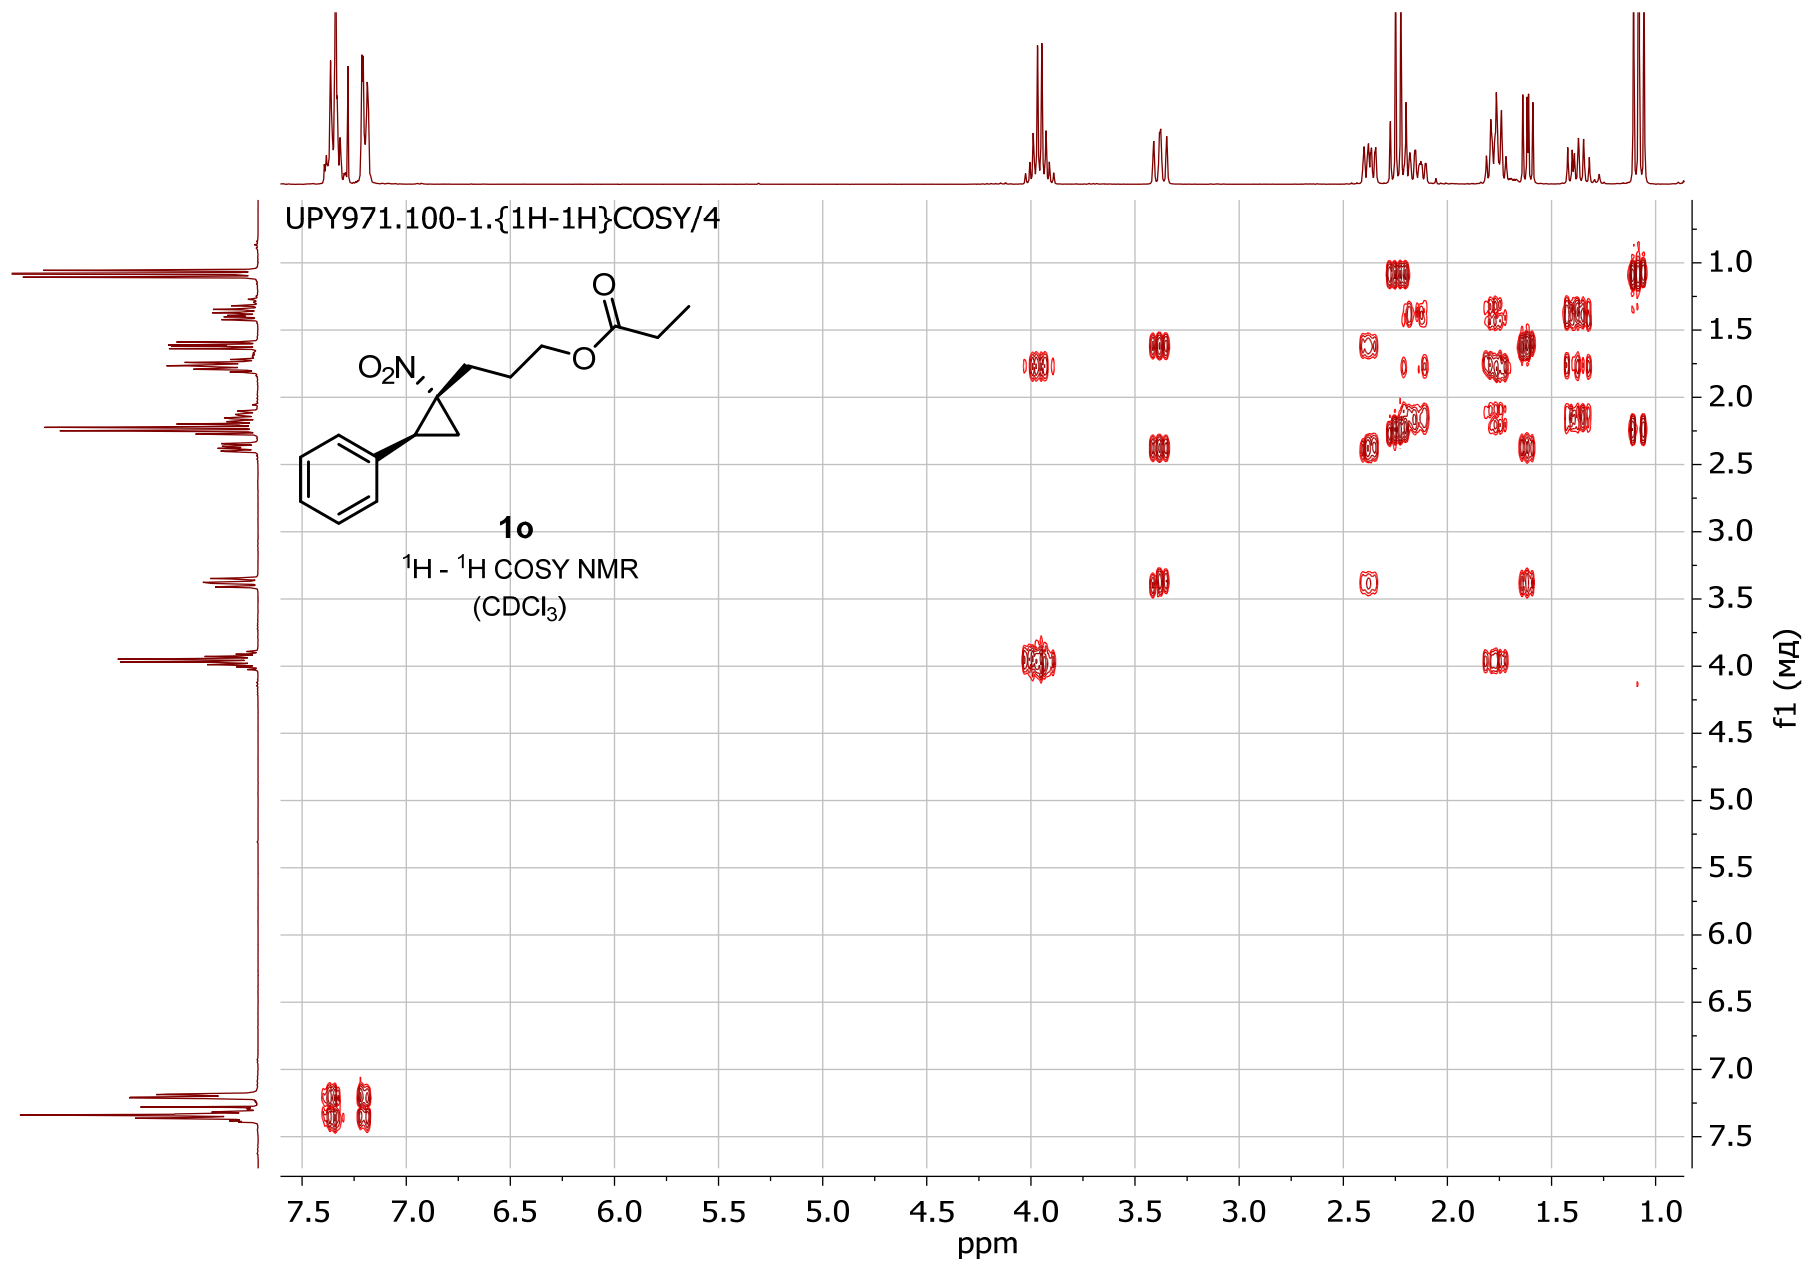

NMR of **1o**

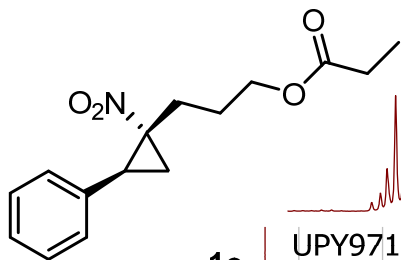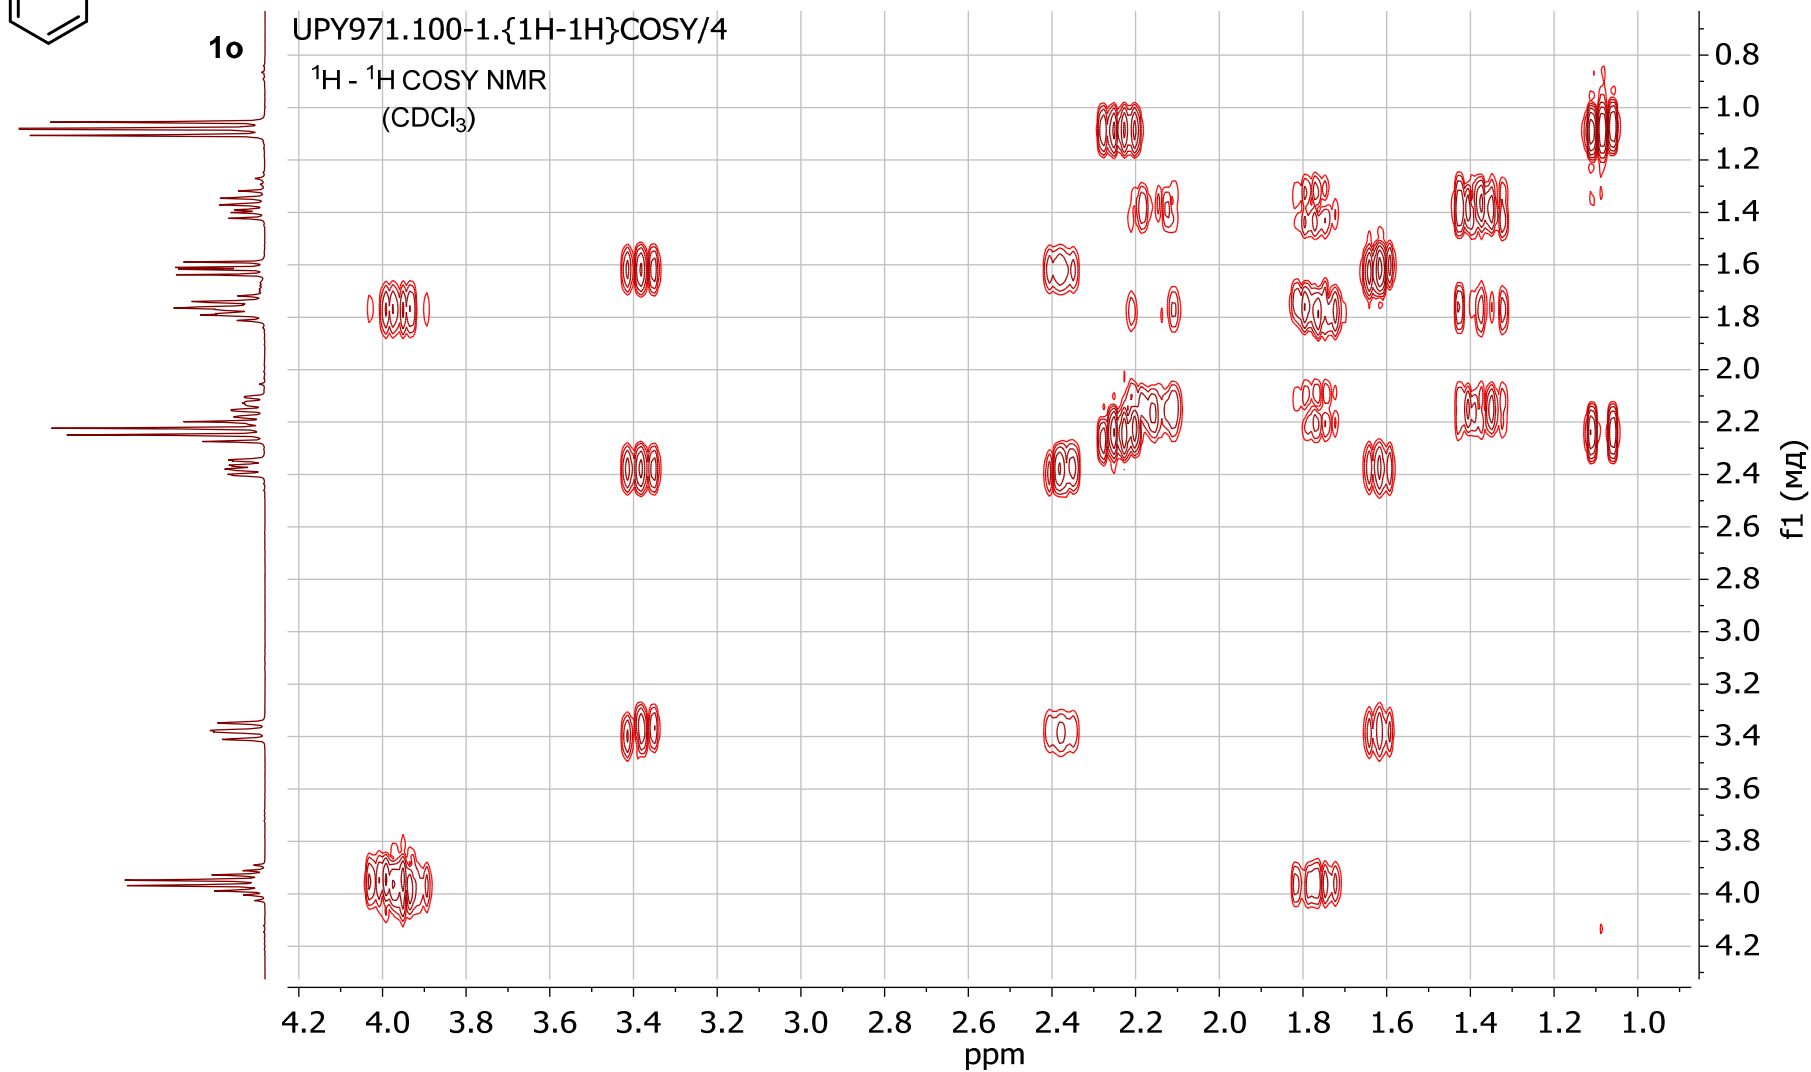

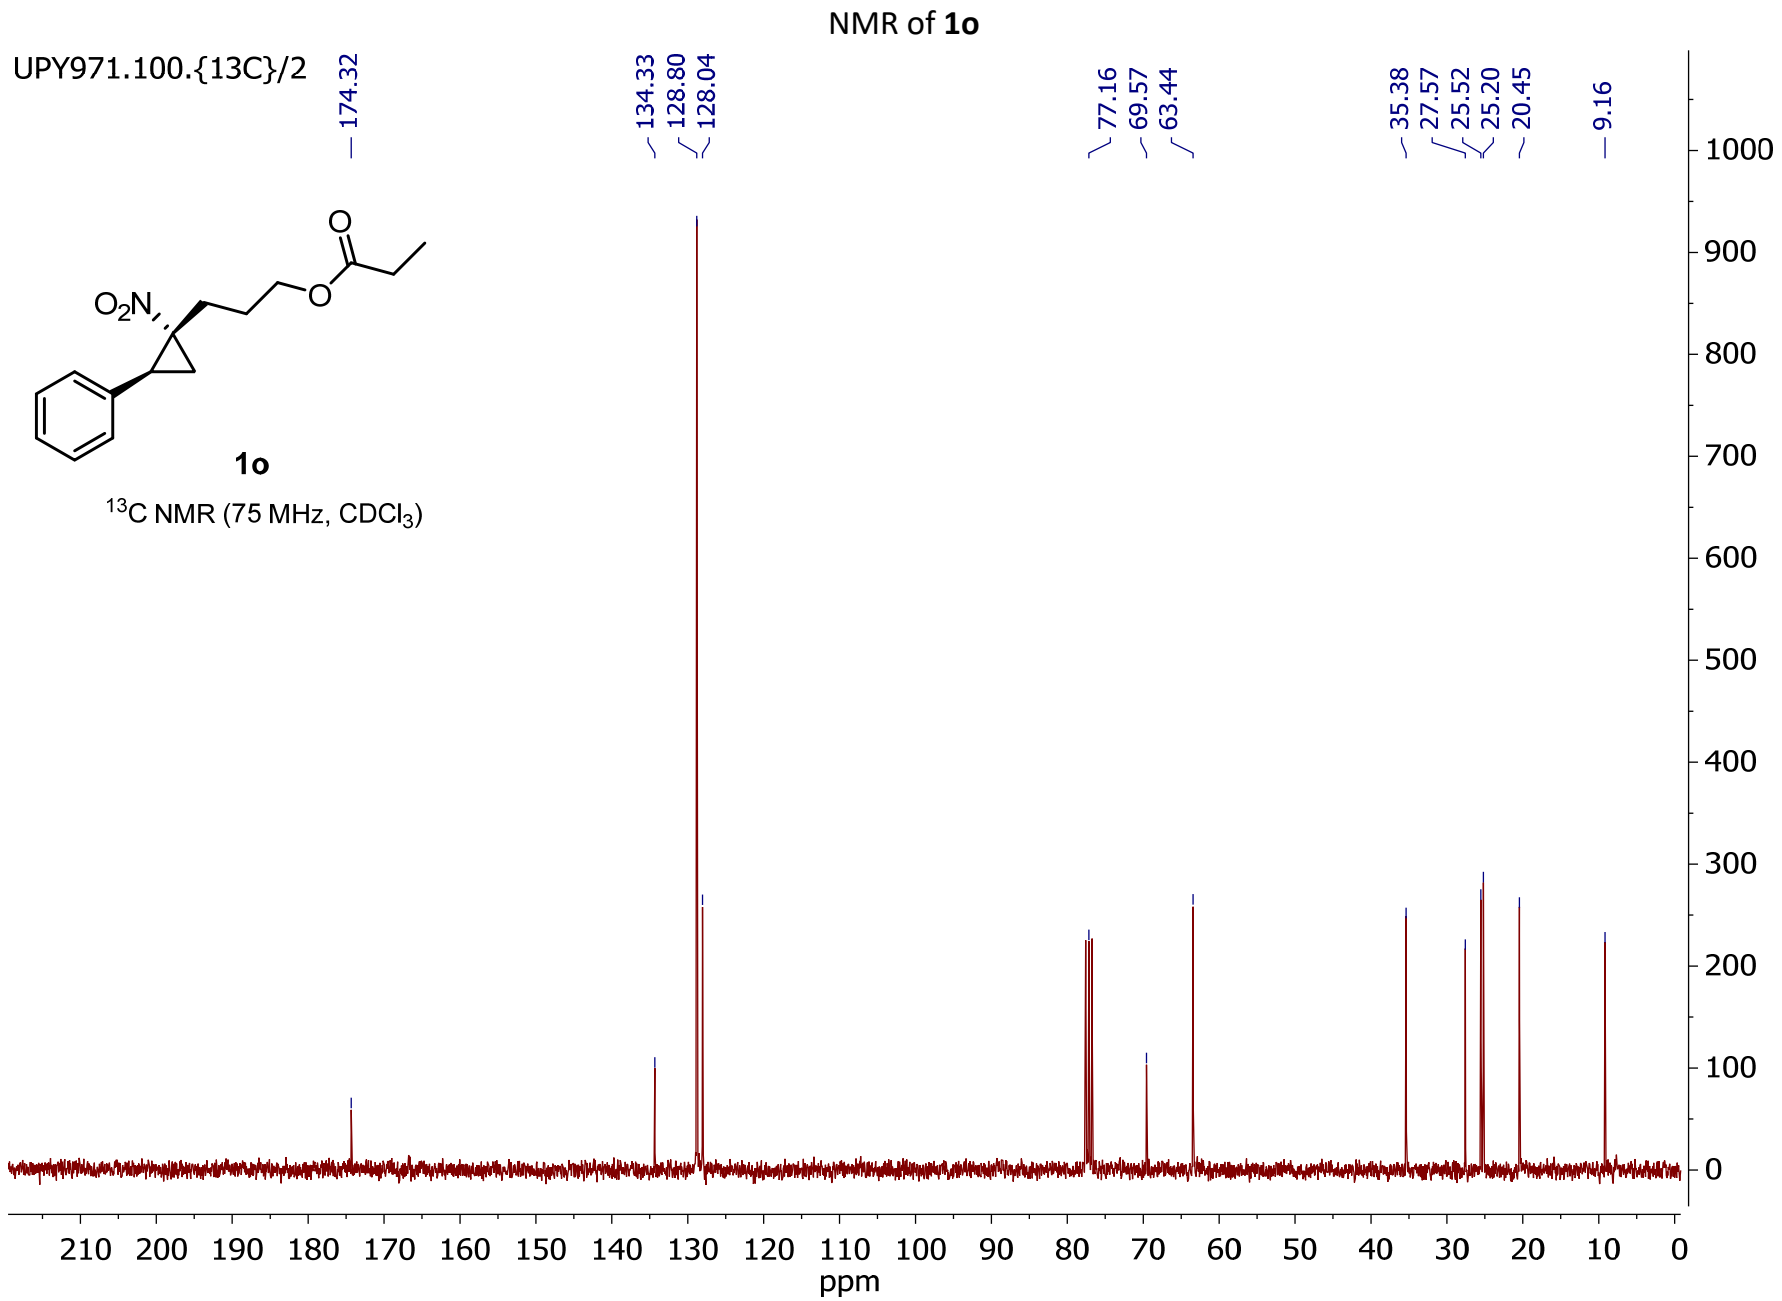

UPY971.100.{13C}depts135/3

### NMR of 1o

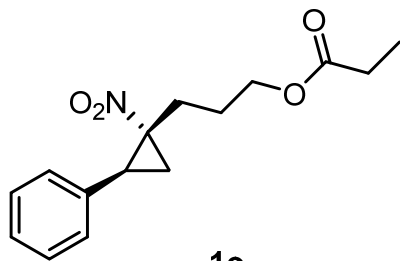

**1o**

<sup>13</sup>C DEPT NMR  
(75 MHz, CDCl<sub>3</sub>)

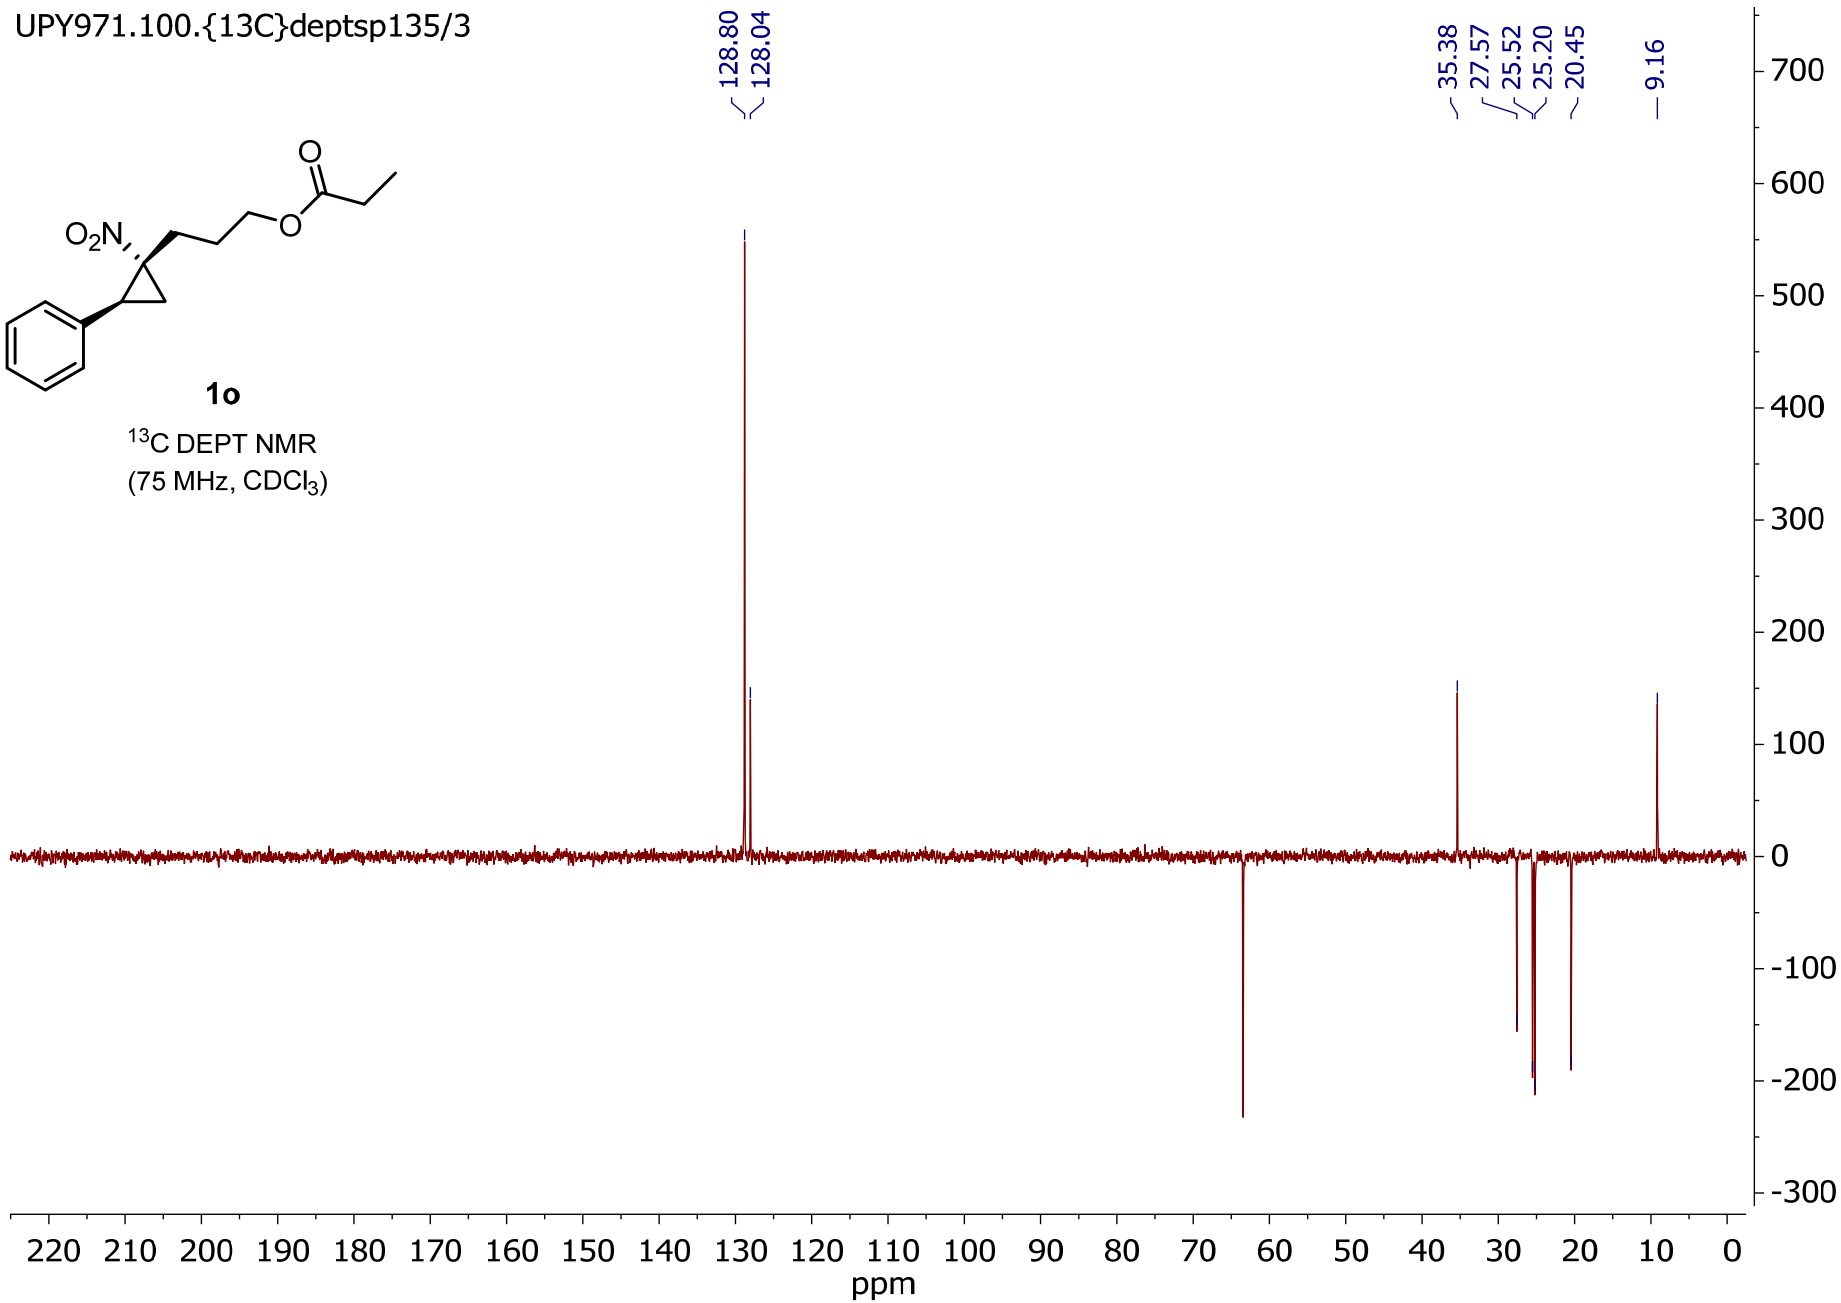

NMR of **1o**

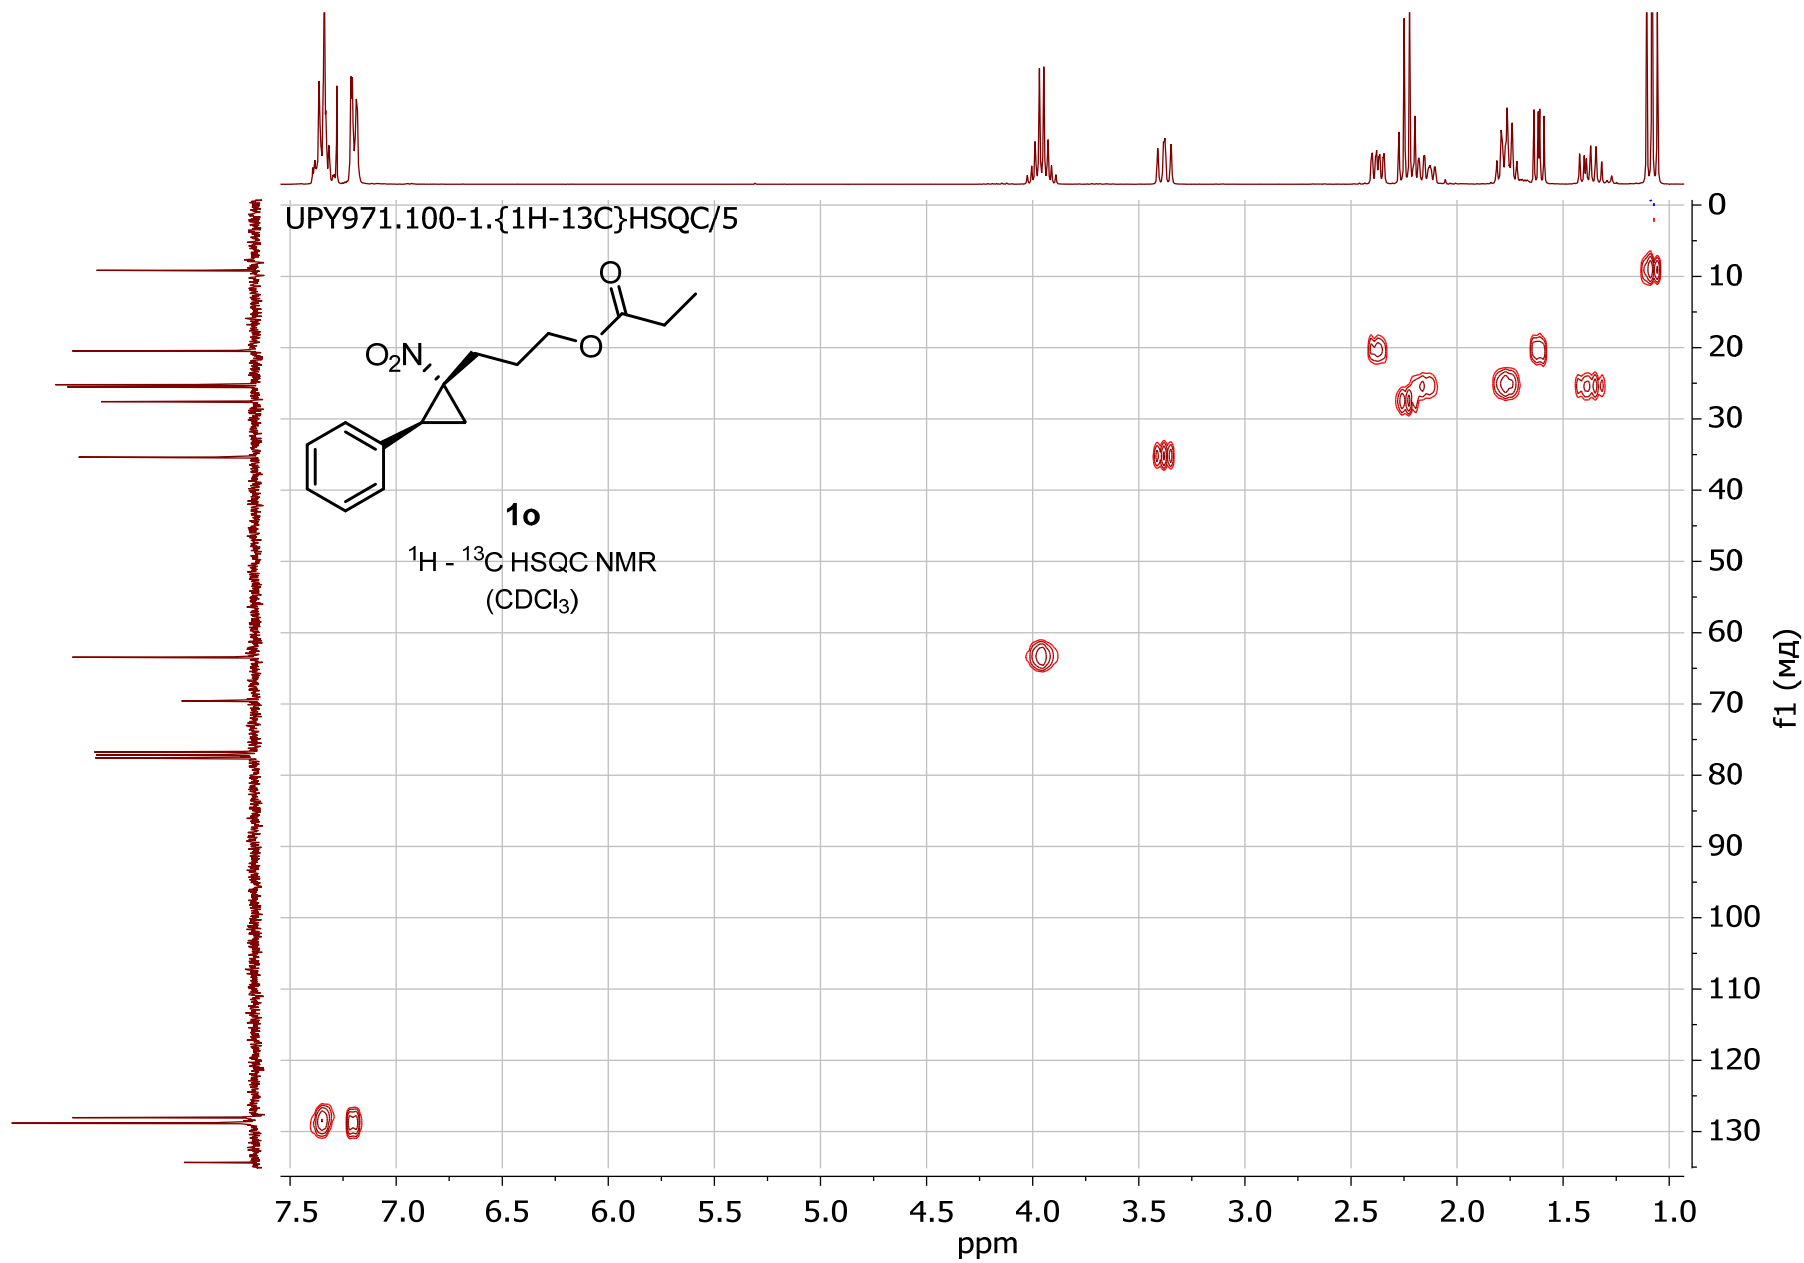



NMR of **1o**

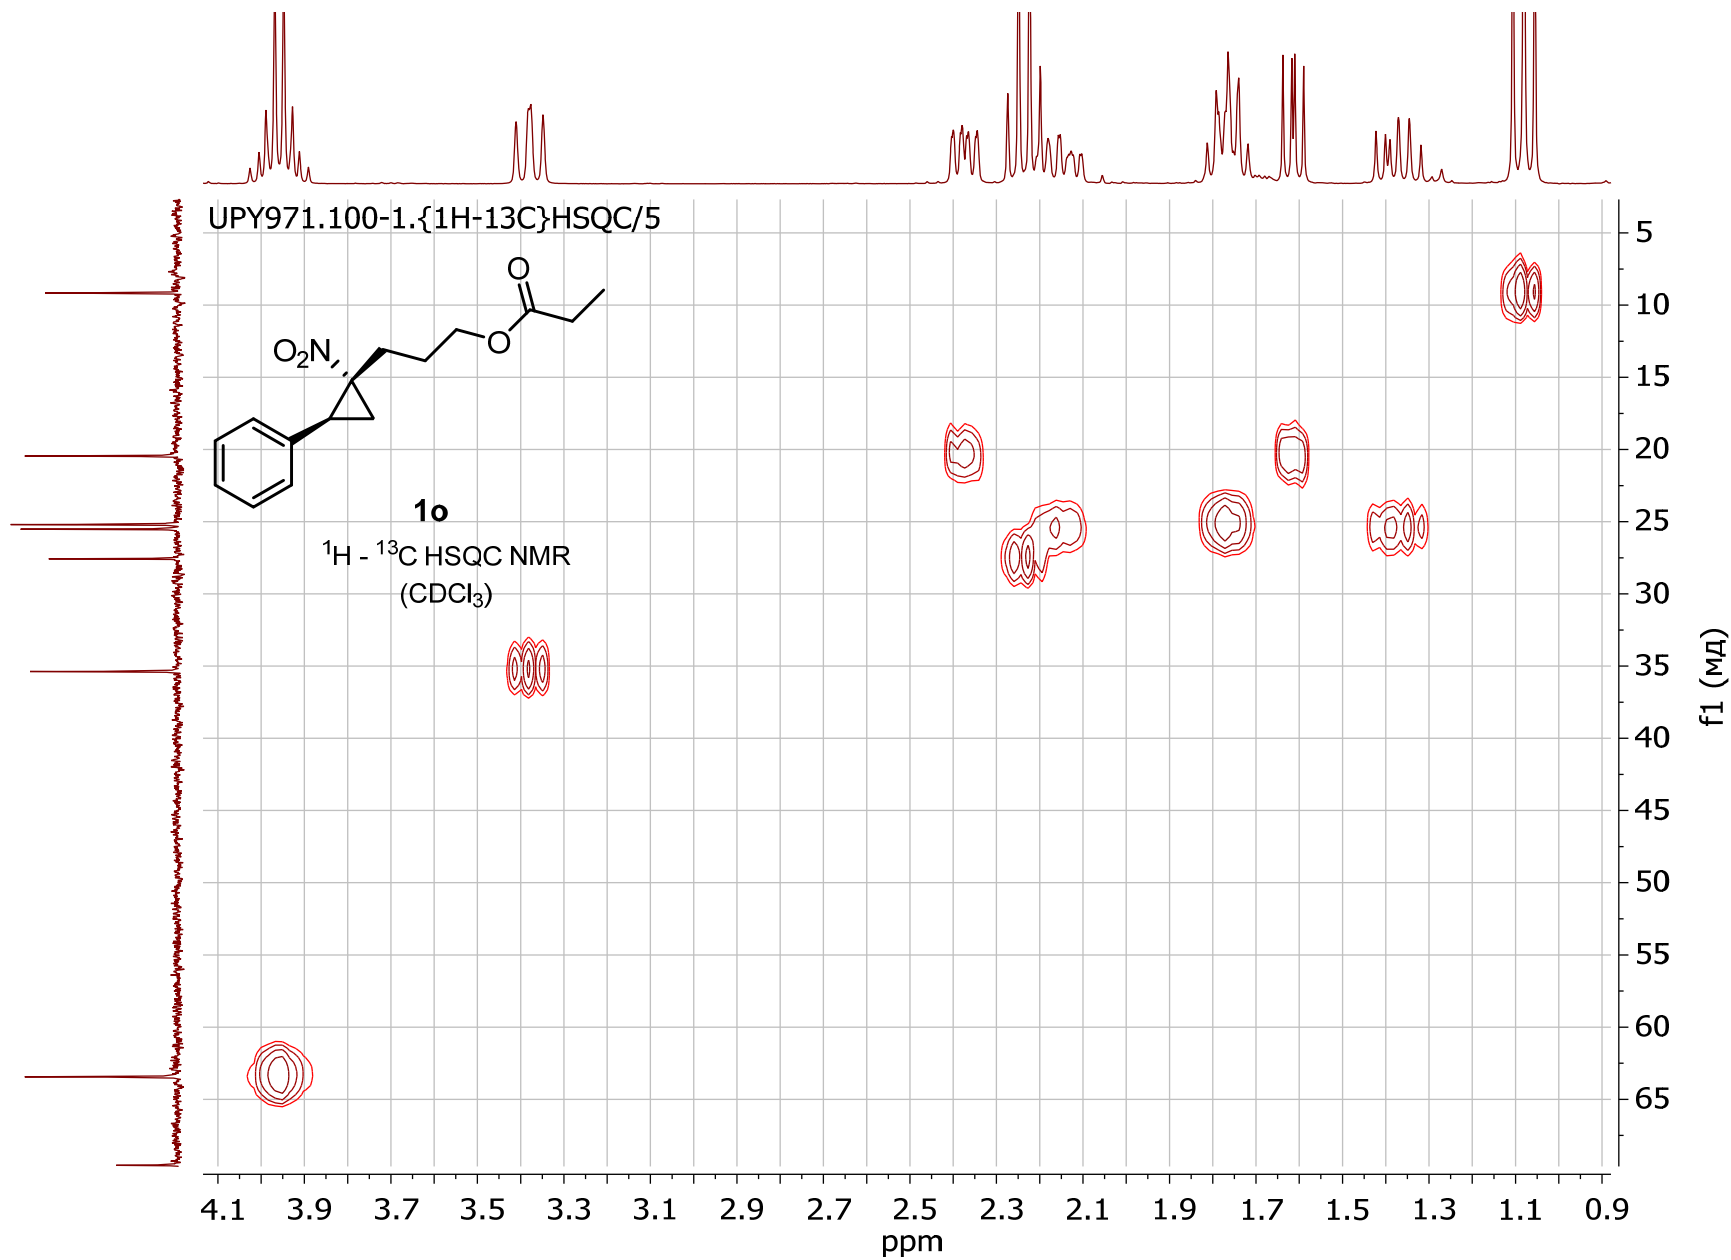

# NMR of 1o

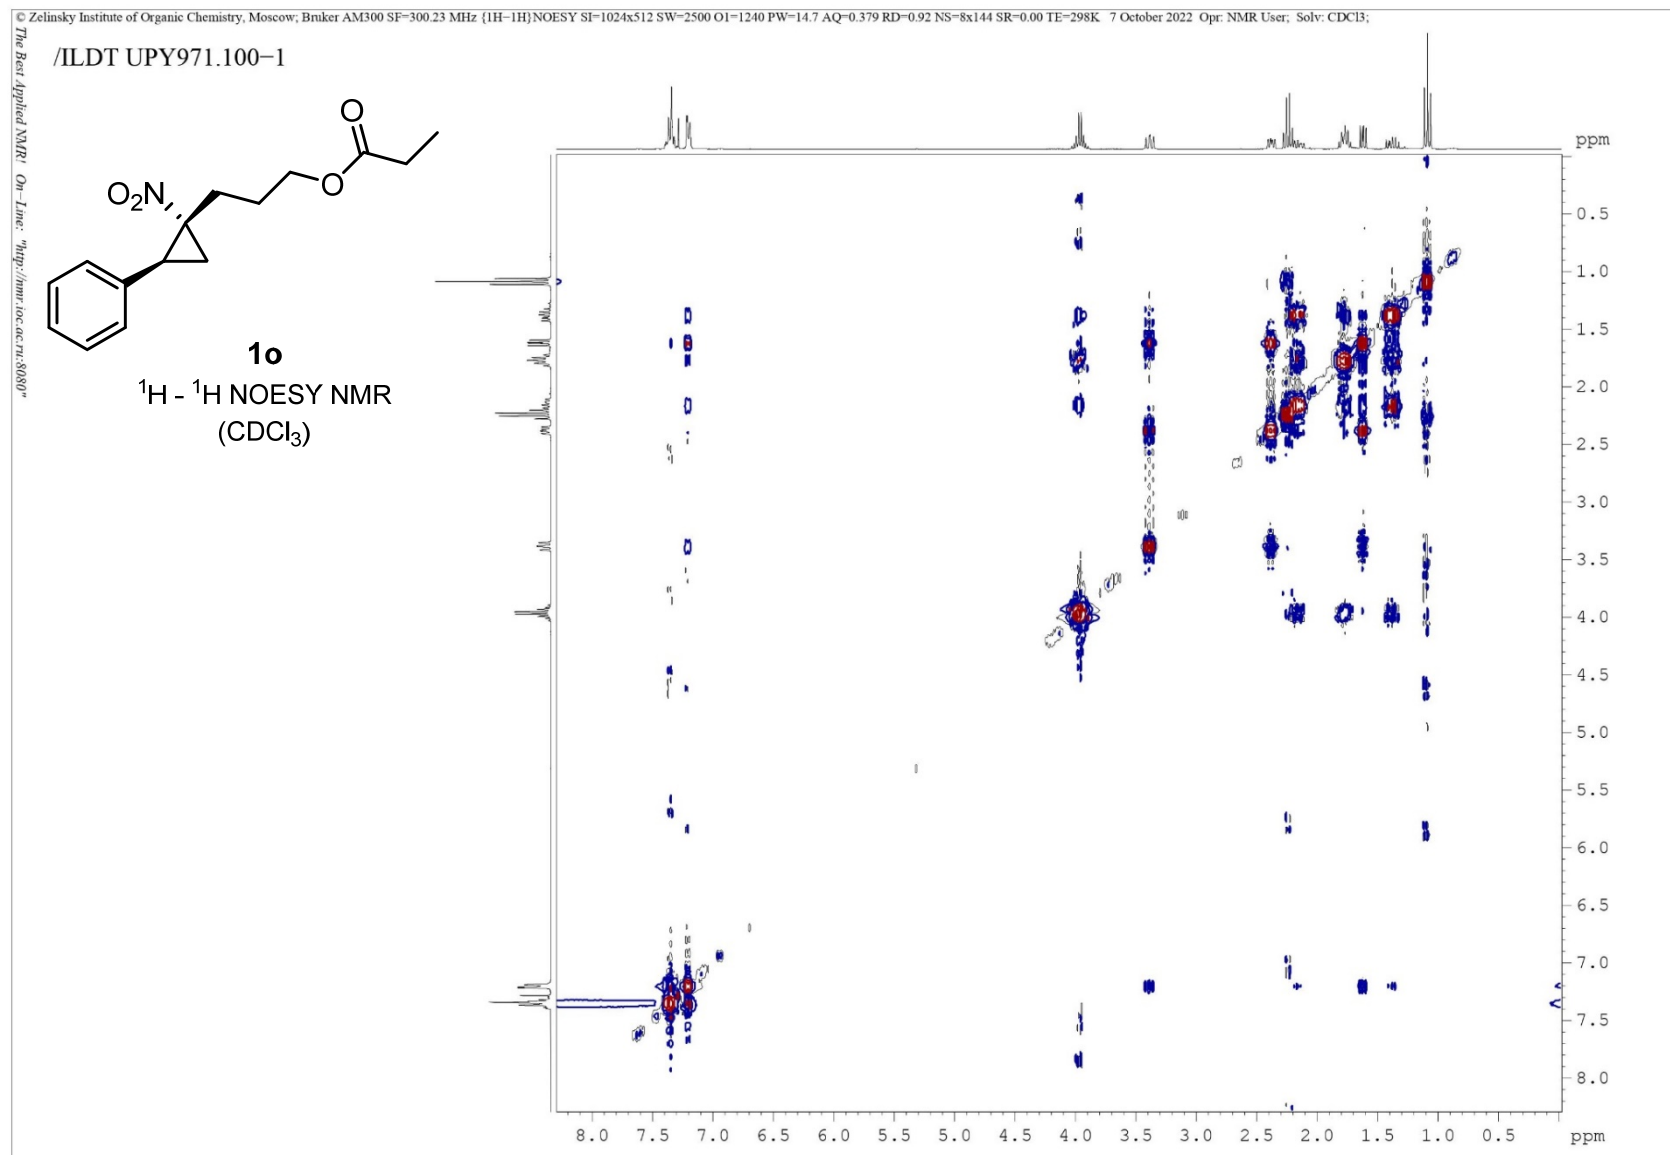

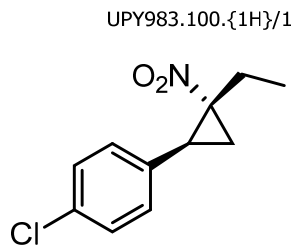

**1p**, *dr* = 4:1

<sup>1</sup>H NMR (300 MHz, CDCl<sub>3</sub>)

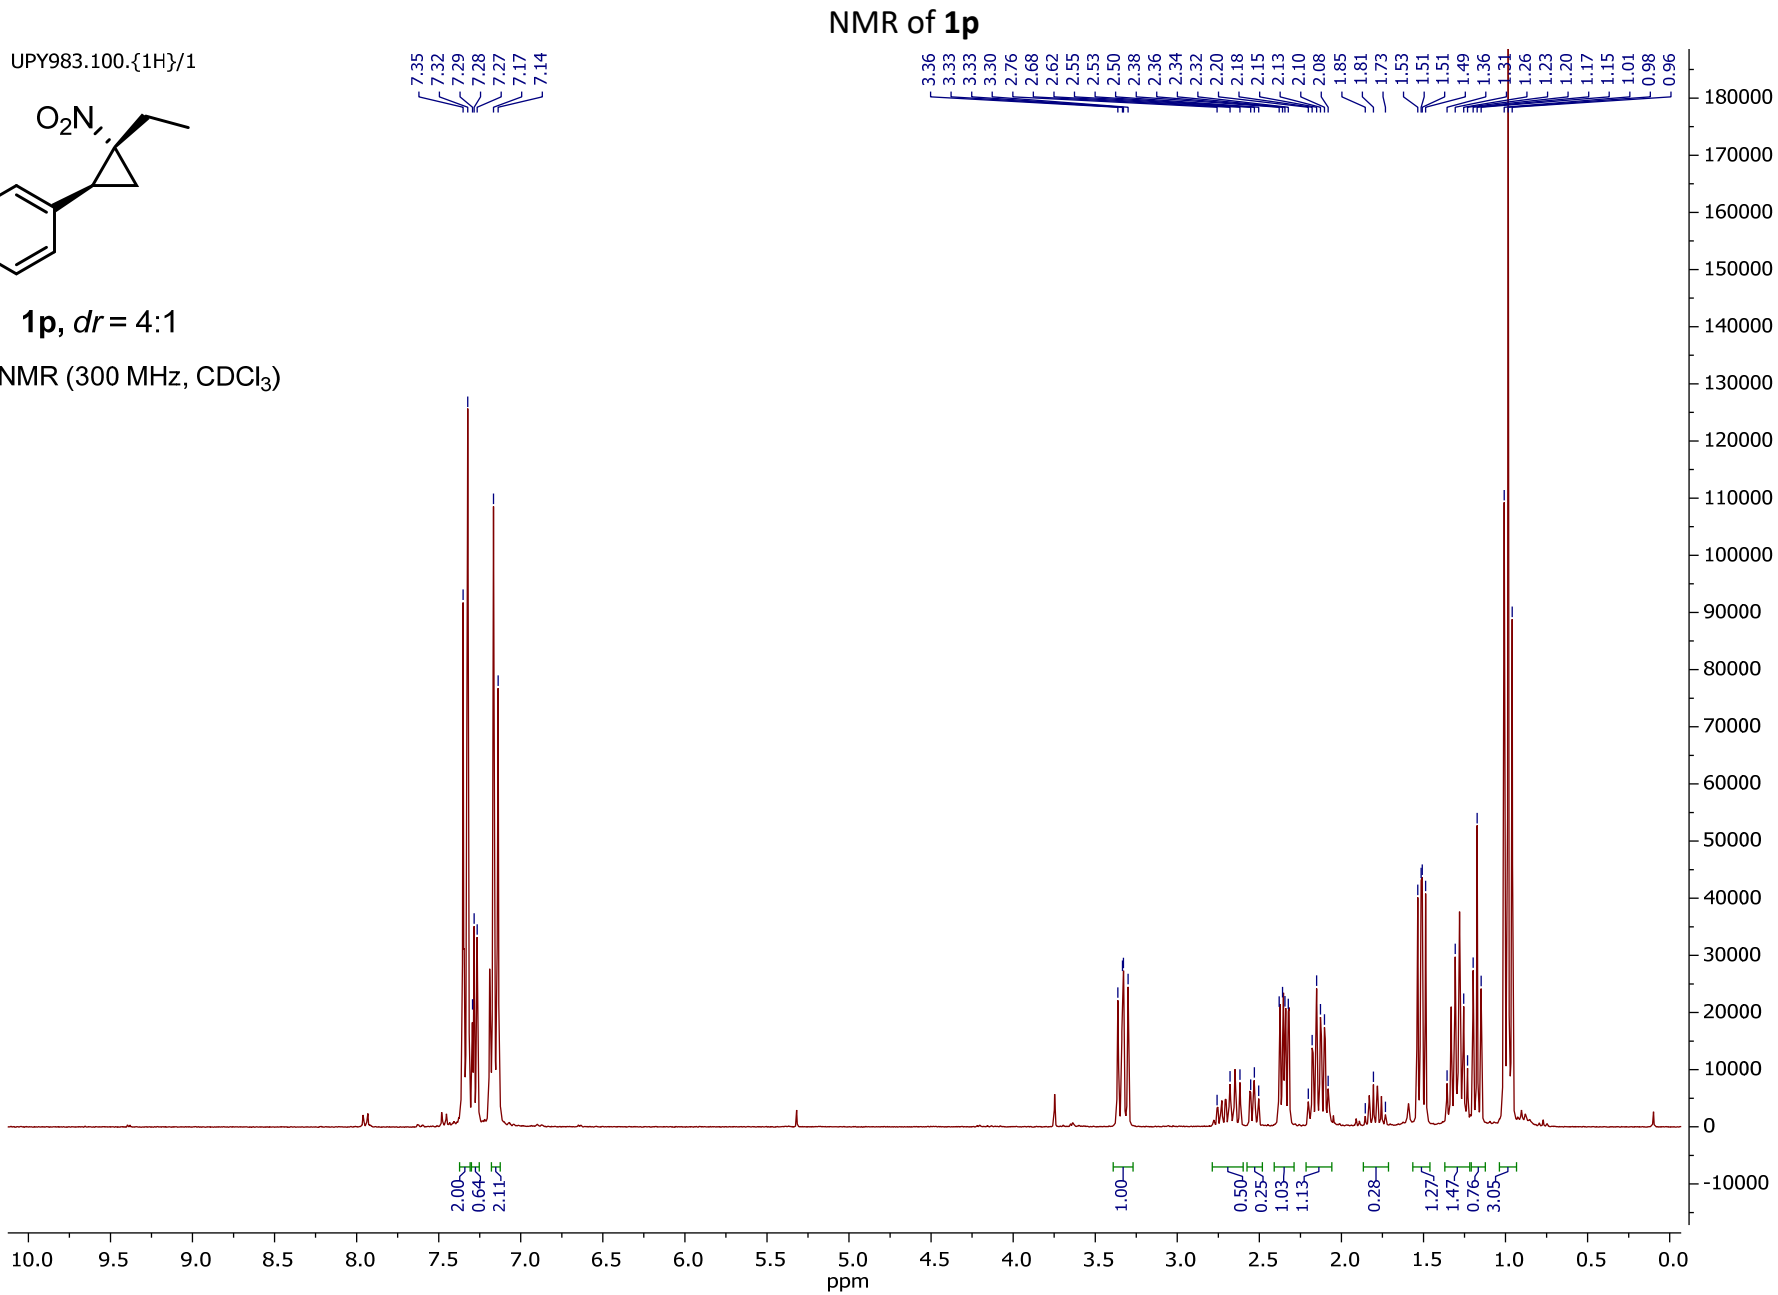

# NMR of 1p

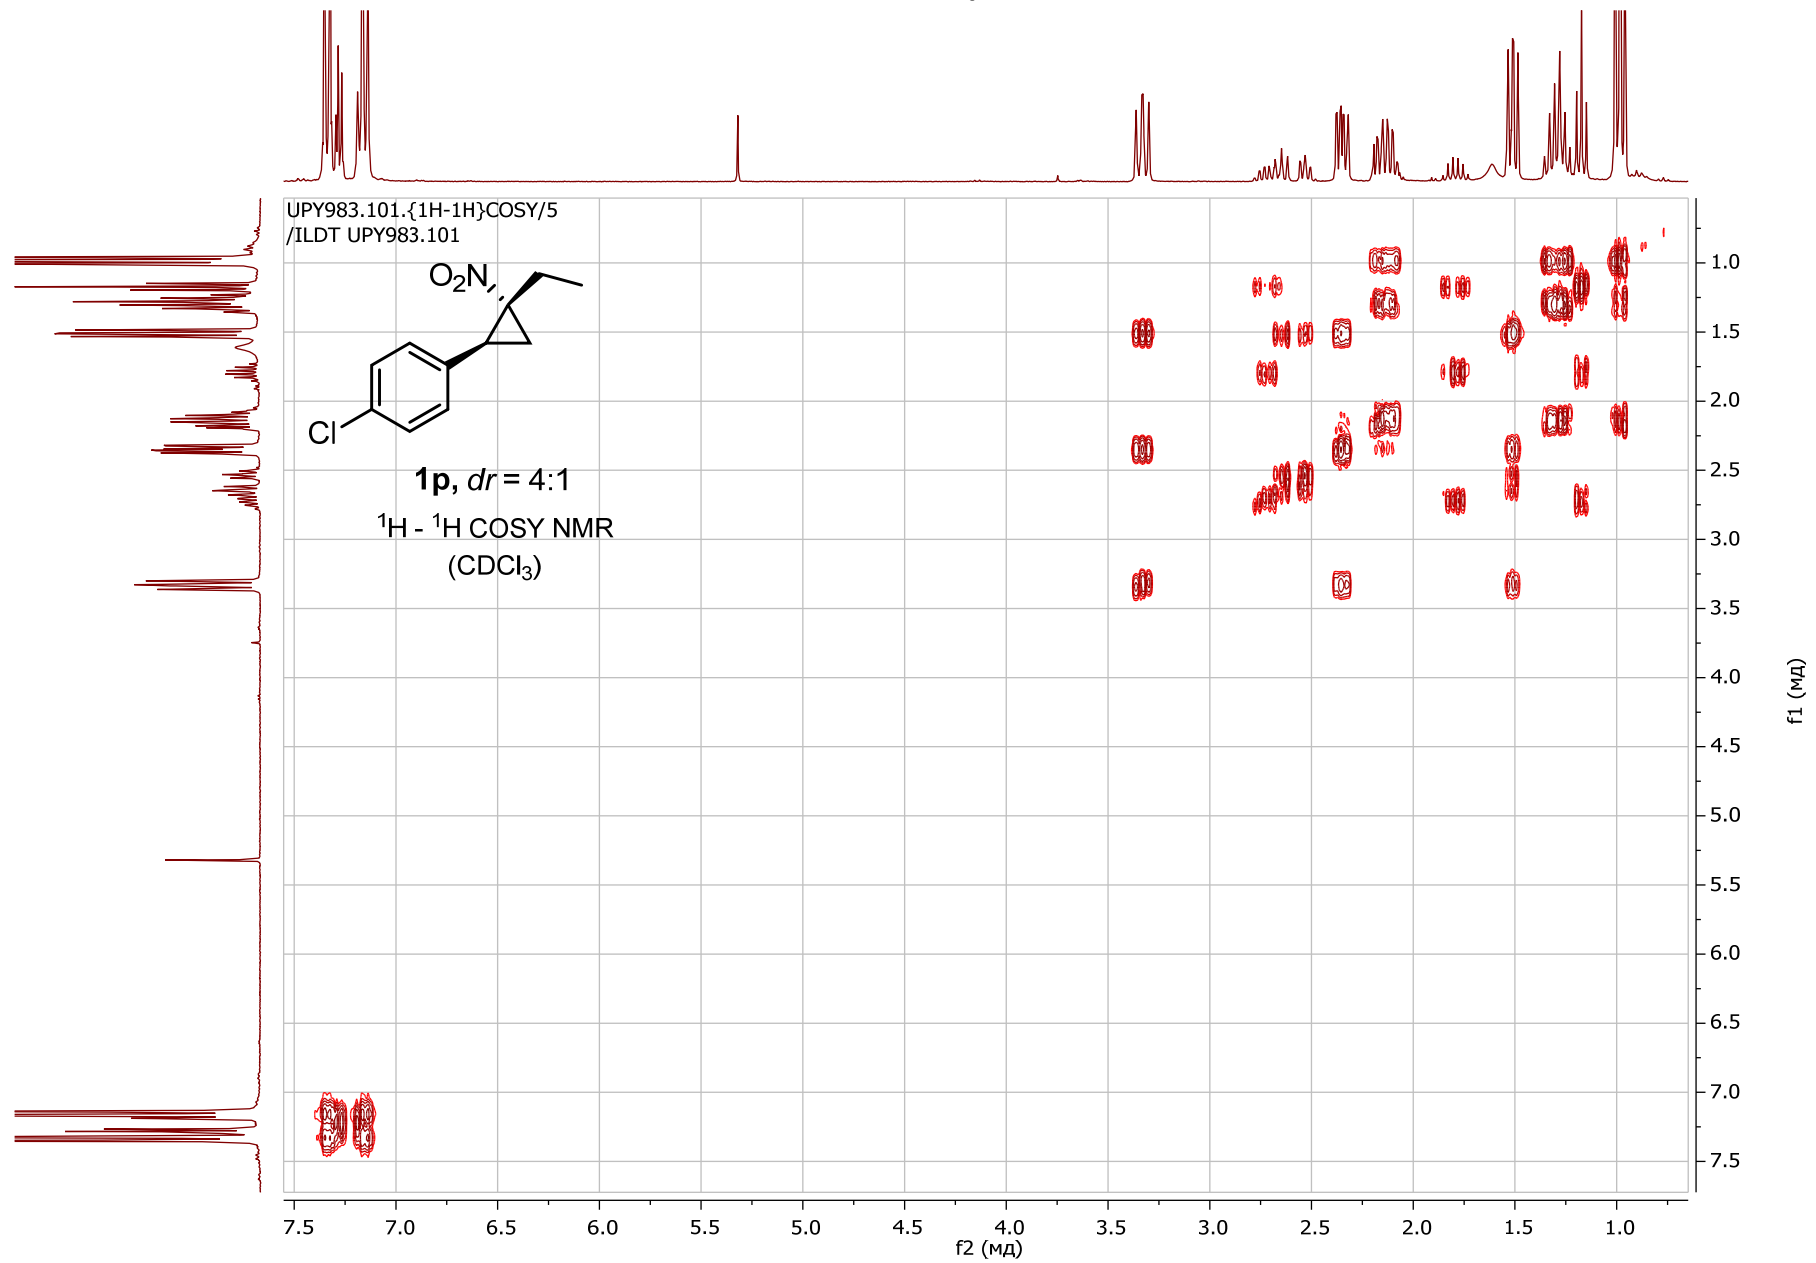

NMR of 1p

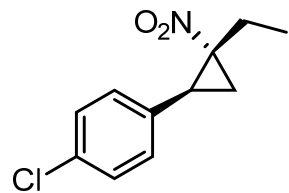

1p, dr = 4:1

UPY983.101.{1H-1H}COSY/5  
/ILDY UPY983.101

<sup>1</sup>H - <sup>1</sup>H COSY NMR  
(CDCl<sub>3</sub>)

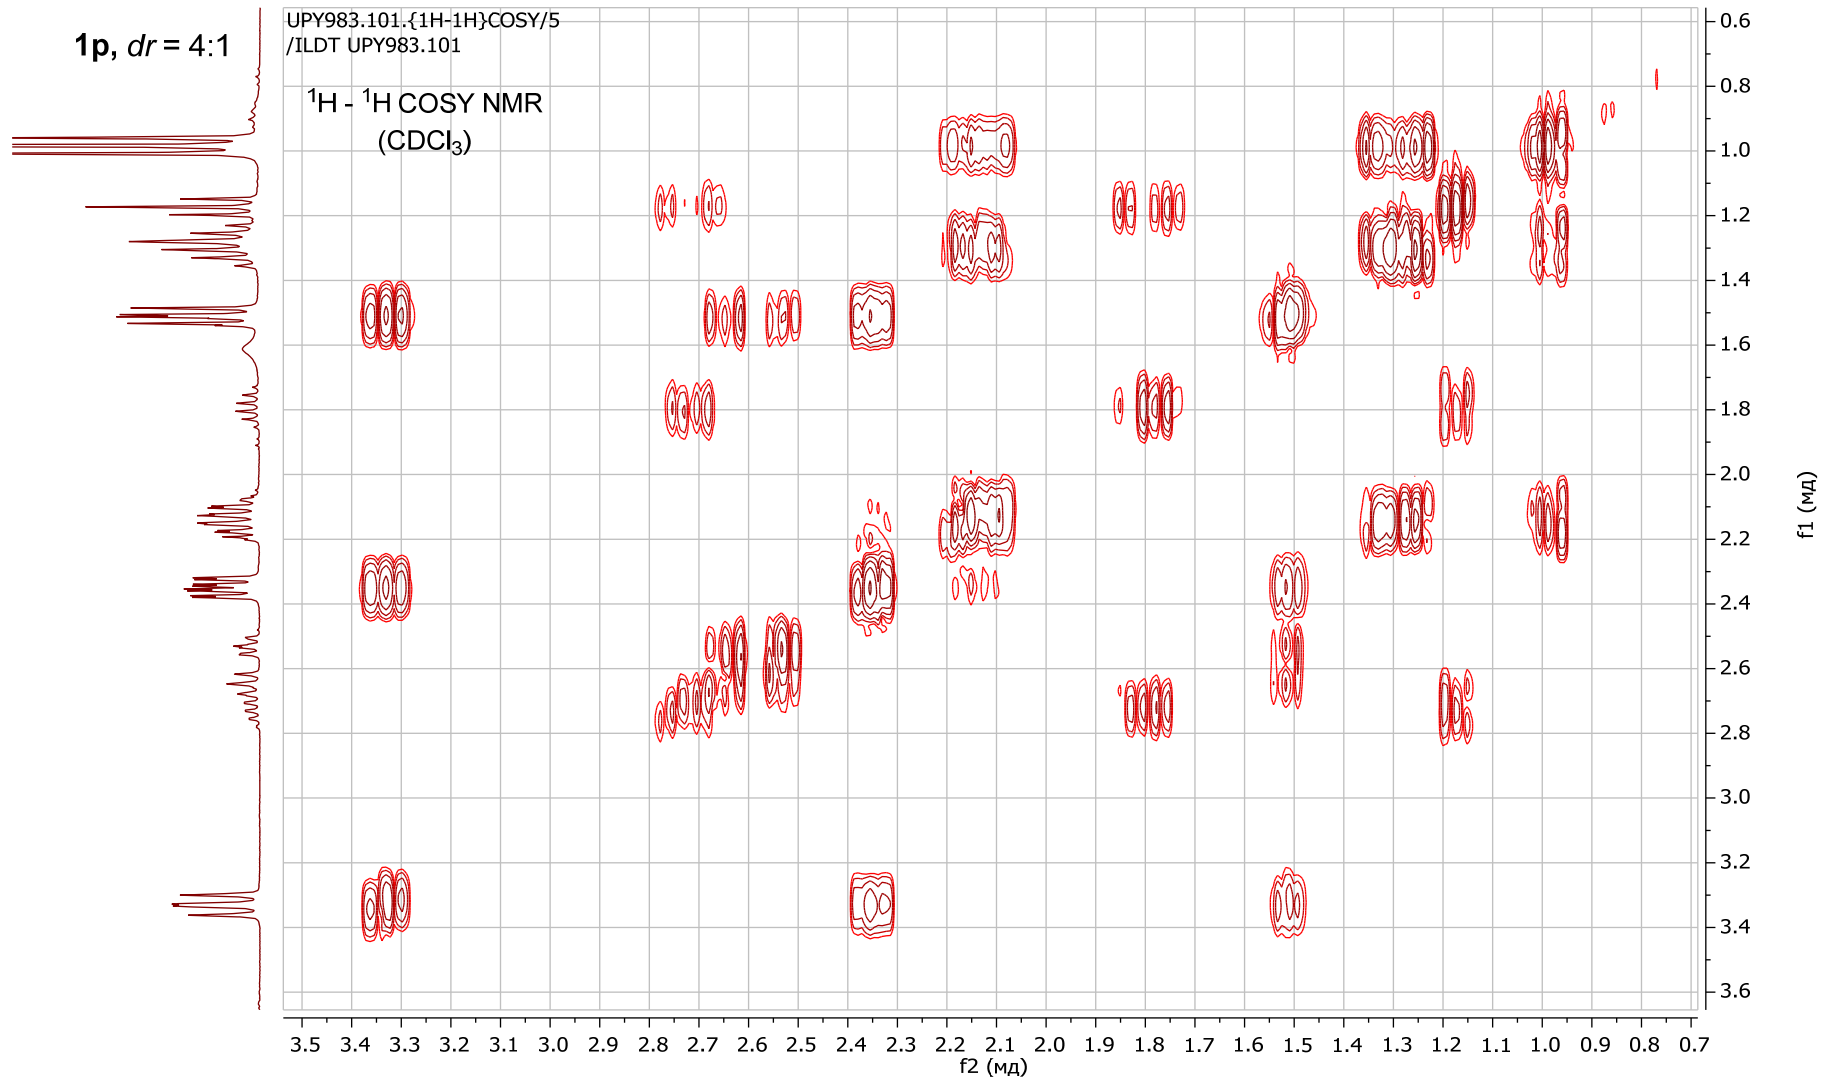

# NMR of 1p

UPY983.101.{13C}/2  
/ILDT UPY983.101

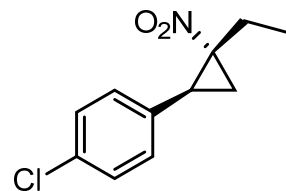

**1p**, *dr* = 4:1

<sup>13</sup>C NMR (75 MHz, CDCl<sub>3</sub>)

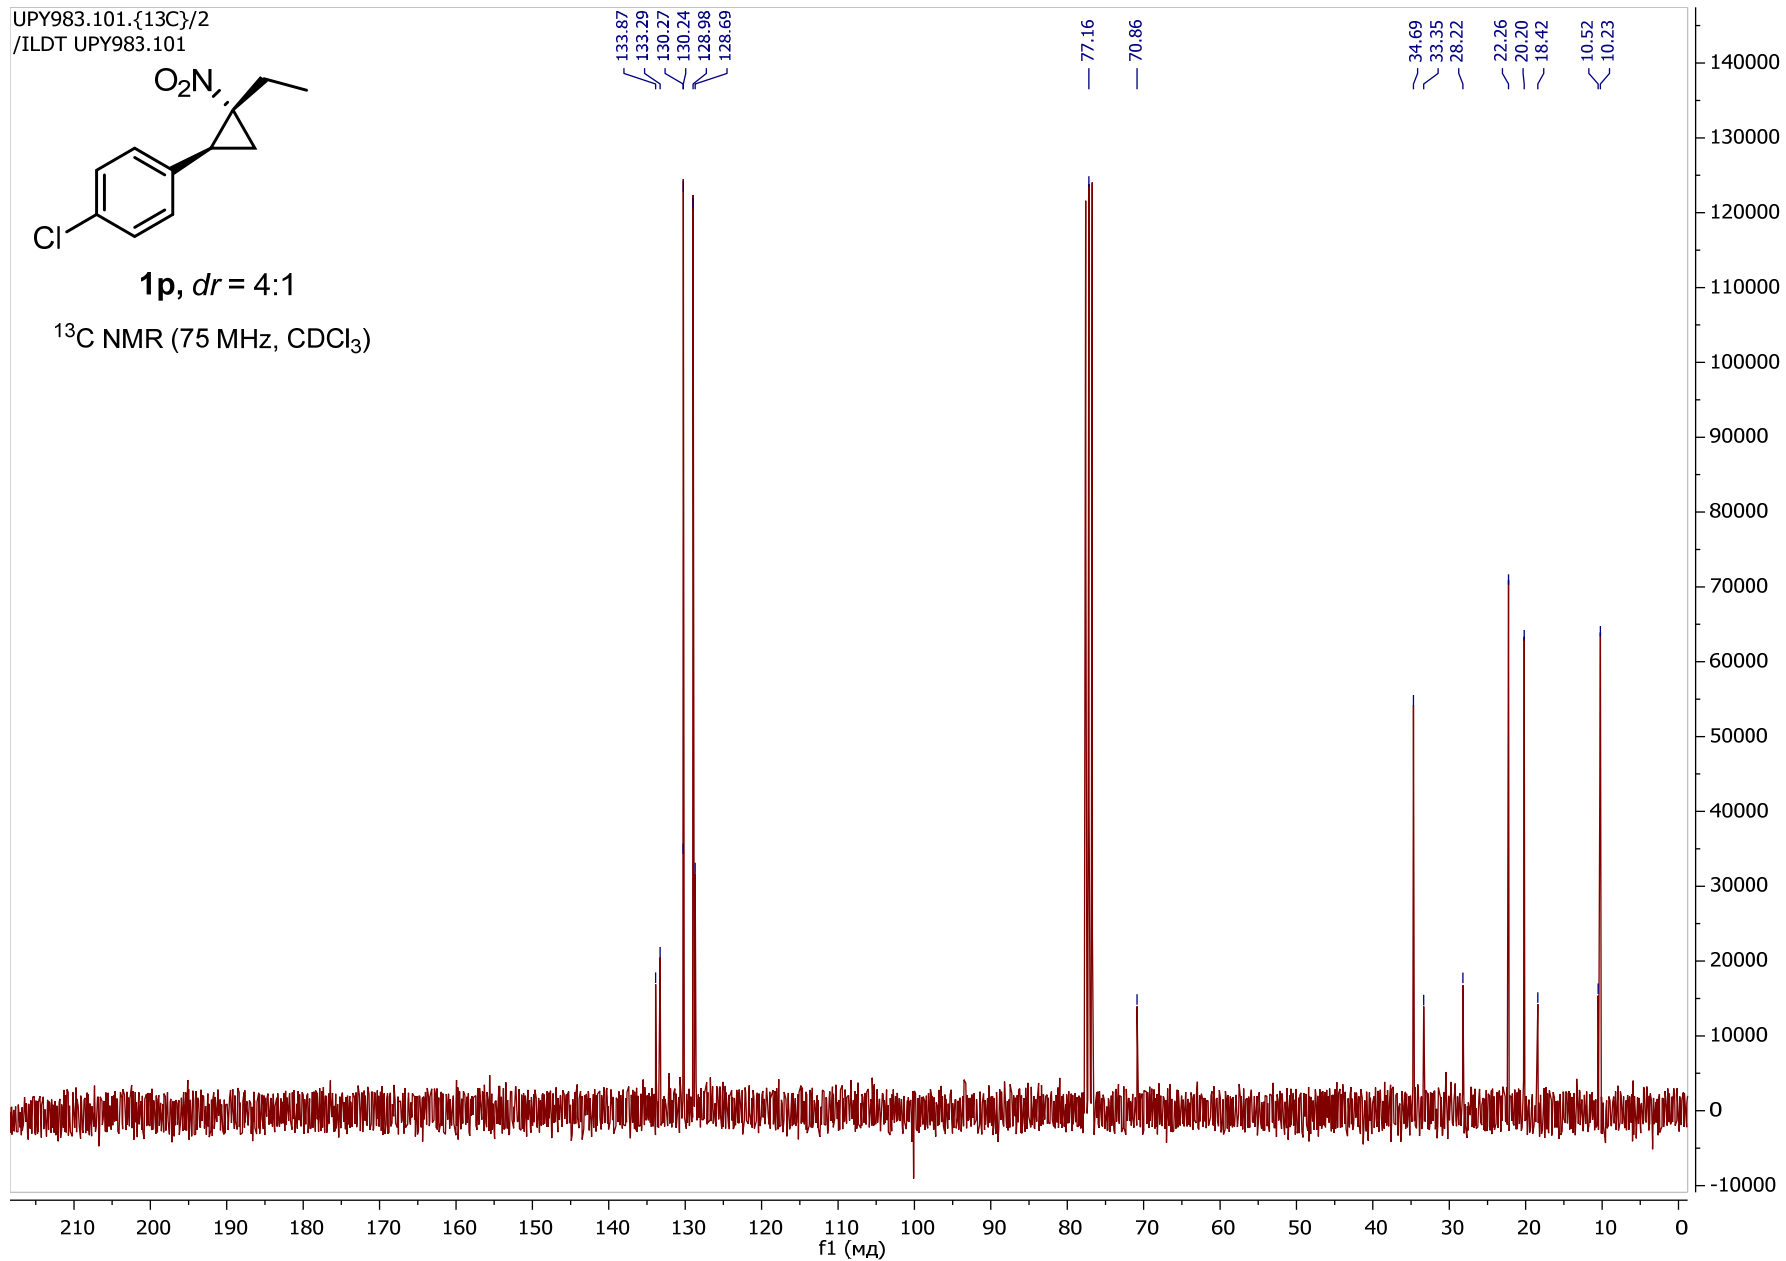

# NMR of 1p

UPY983.101.{13C}depts135/3  
/ILD UPY983.101

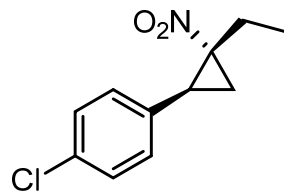

**1p**, *dr* = 4:1

<sup>13</sup>C DEPT NMR  
(75 MHz, CDCl<sub>3</sub>)

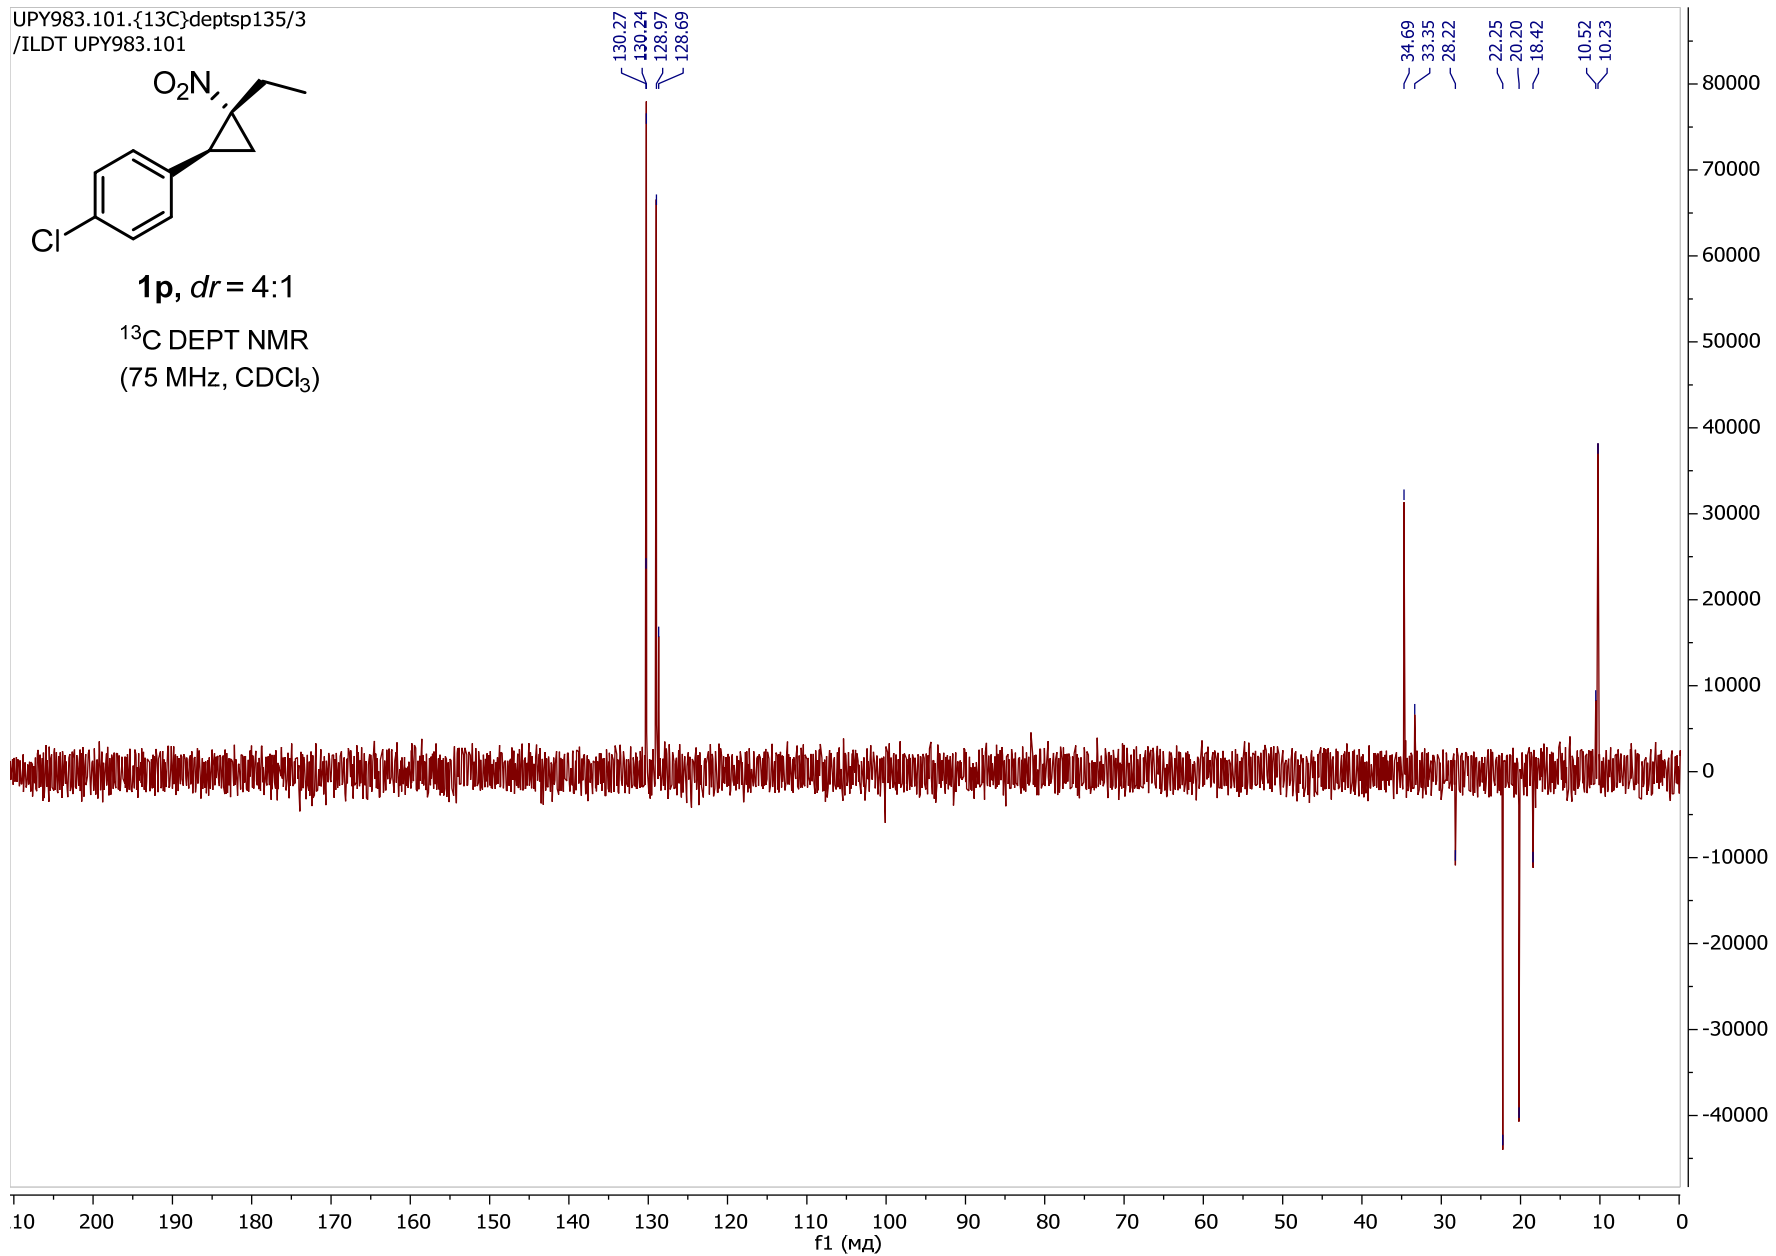

# NMR of 1p

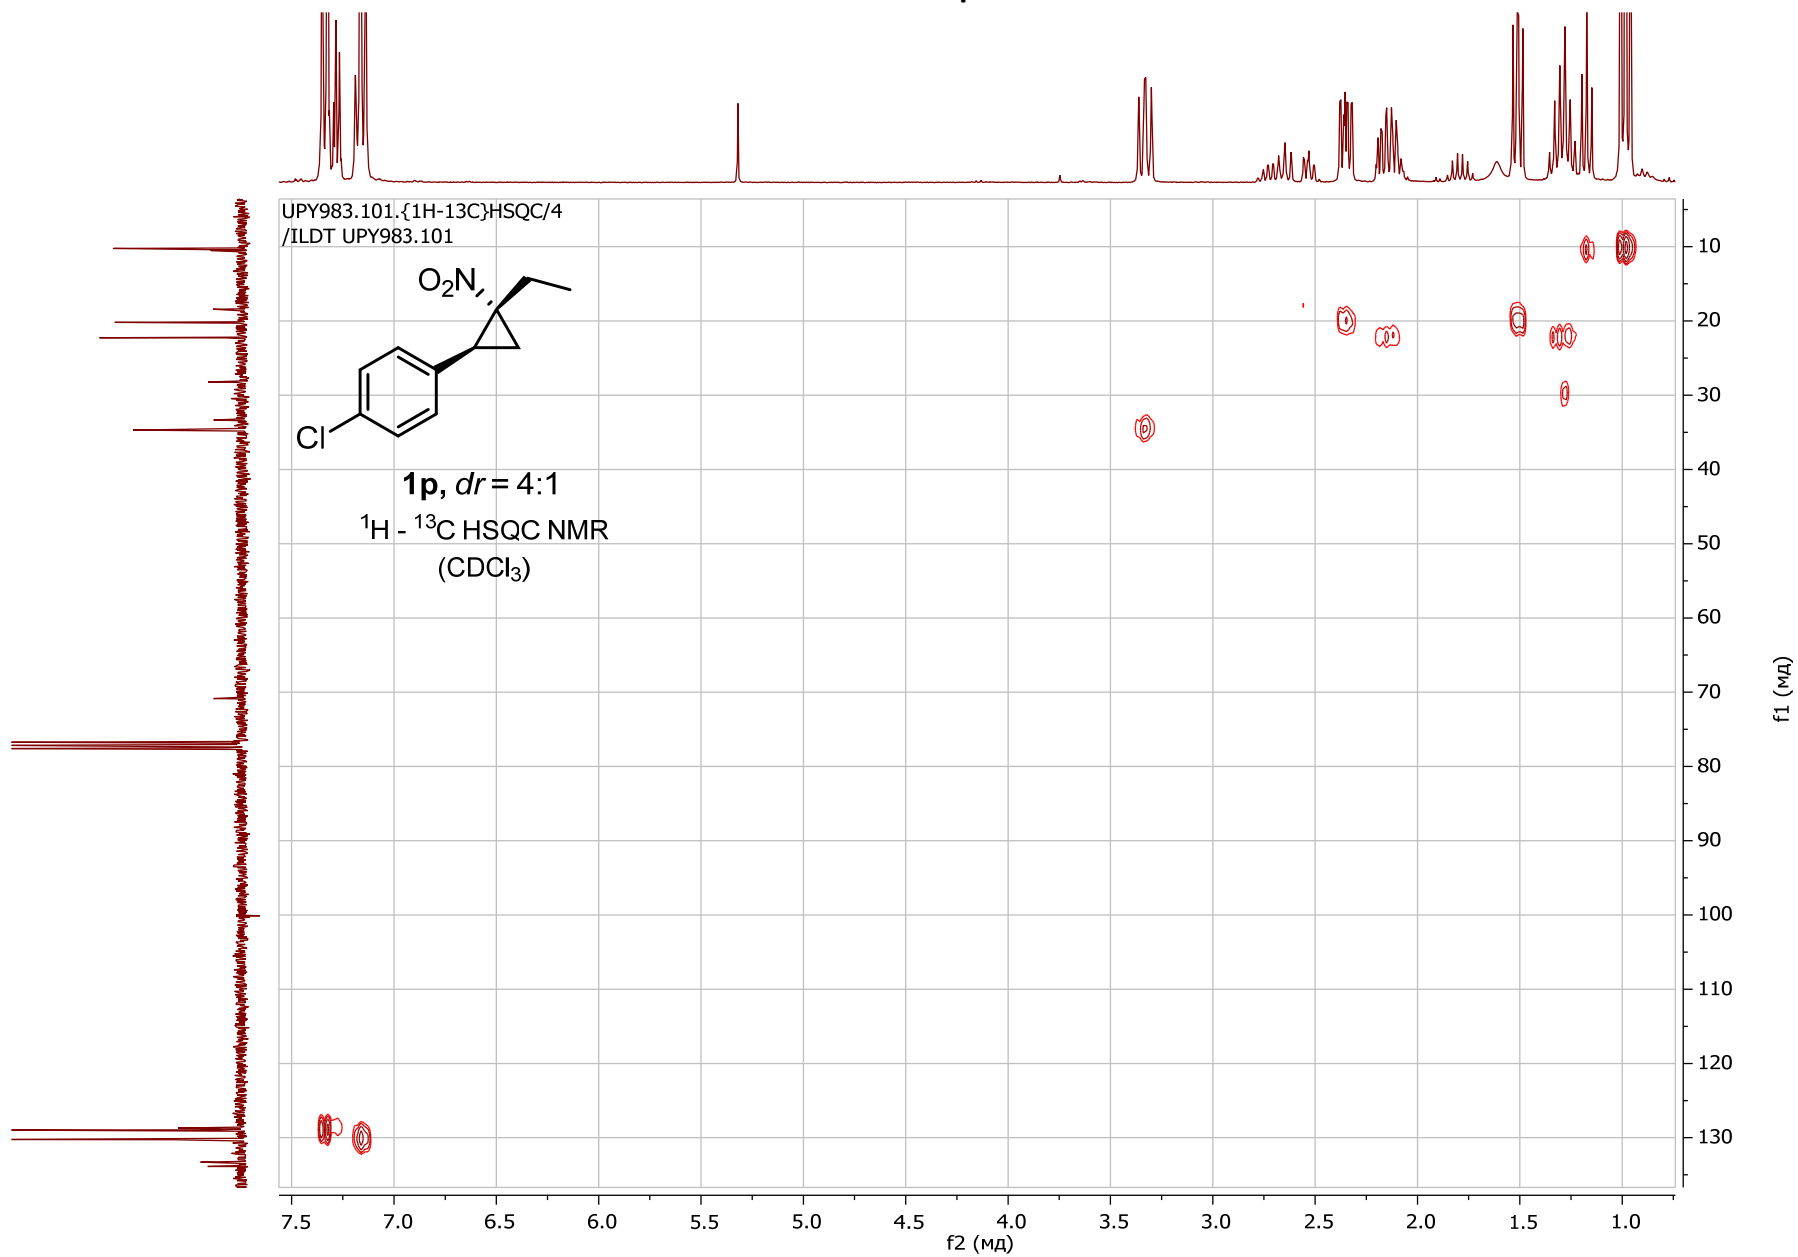



# NMR of 1p

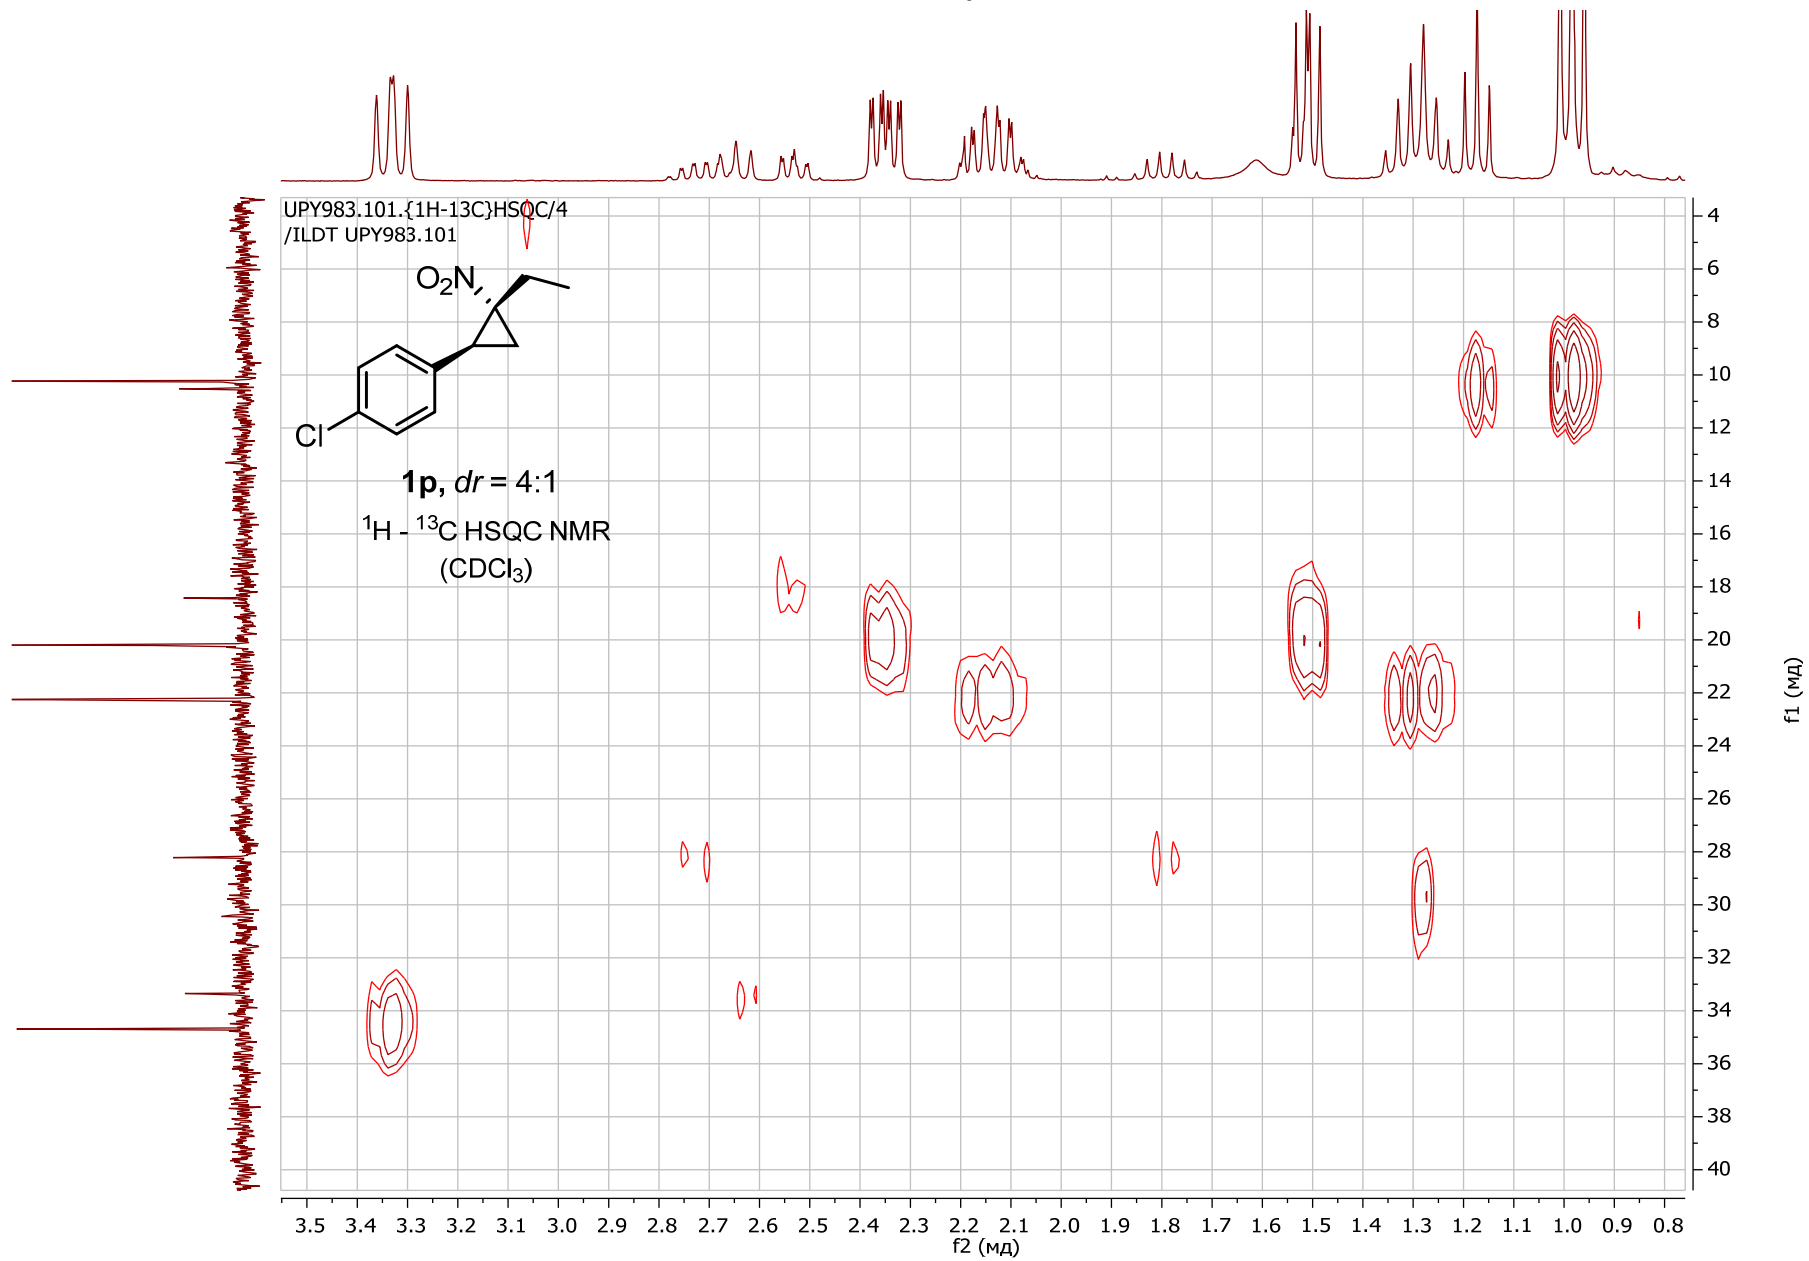

UPY1011.100.{1H}/1

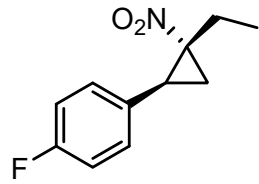

**1q**, *dr* = 14:1

<sup>1</sup>H NMR (300 MHz, CDCl<sub>3</sub>)

### NMR of 1q

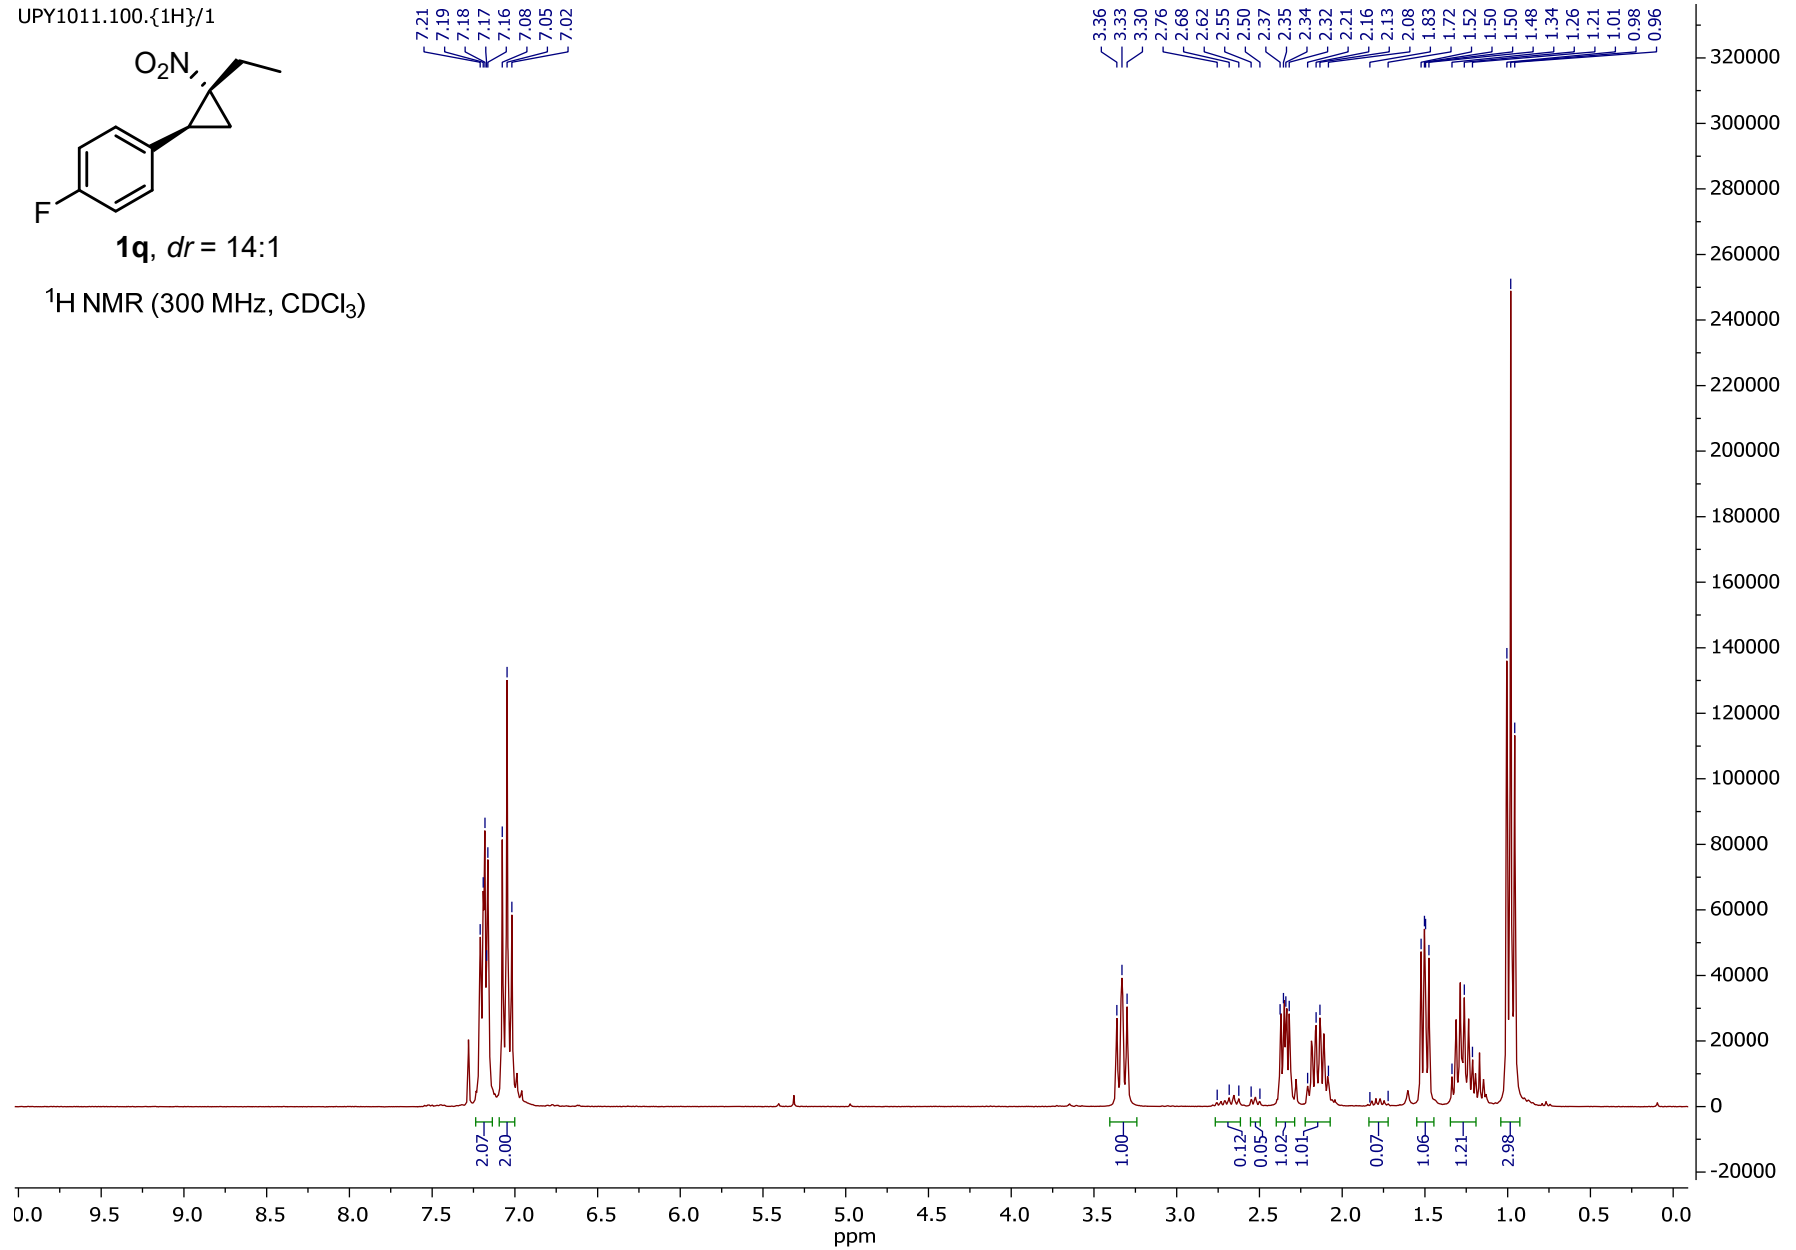

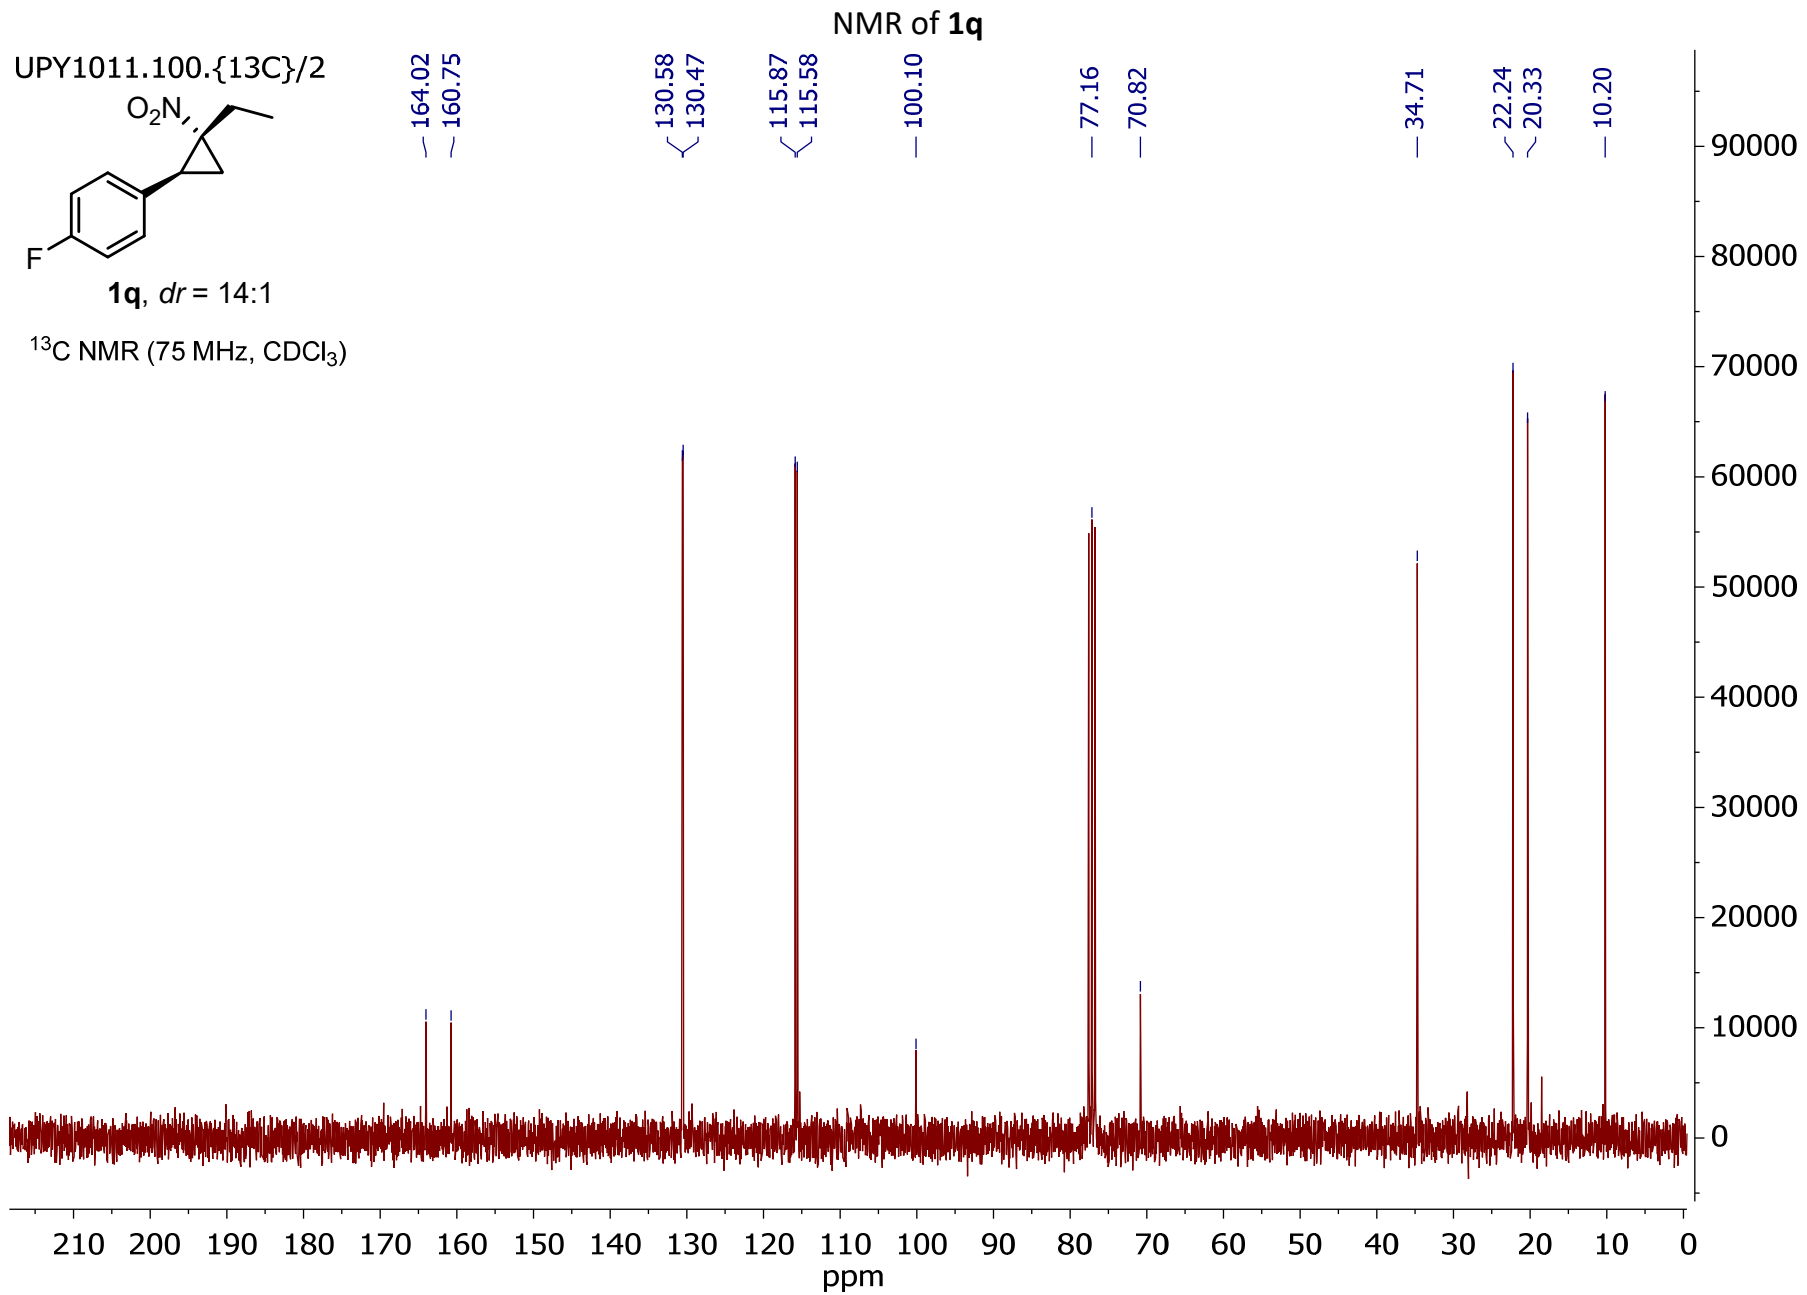

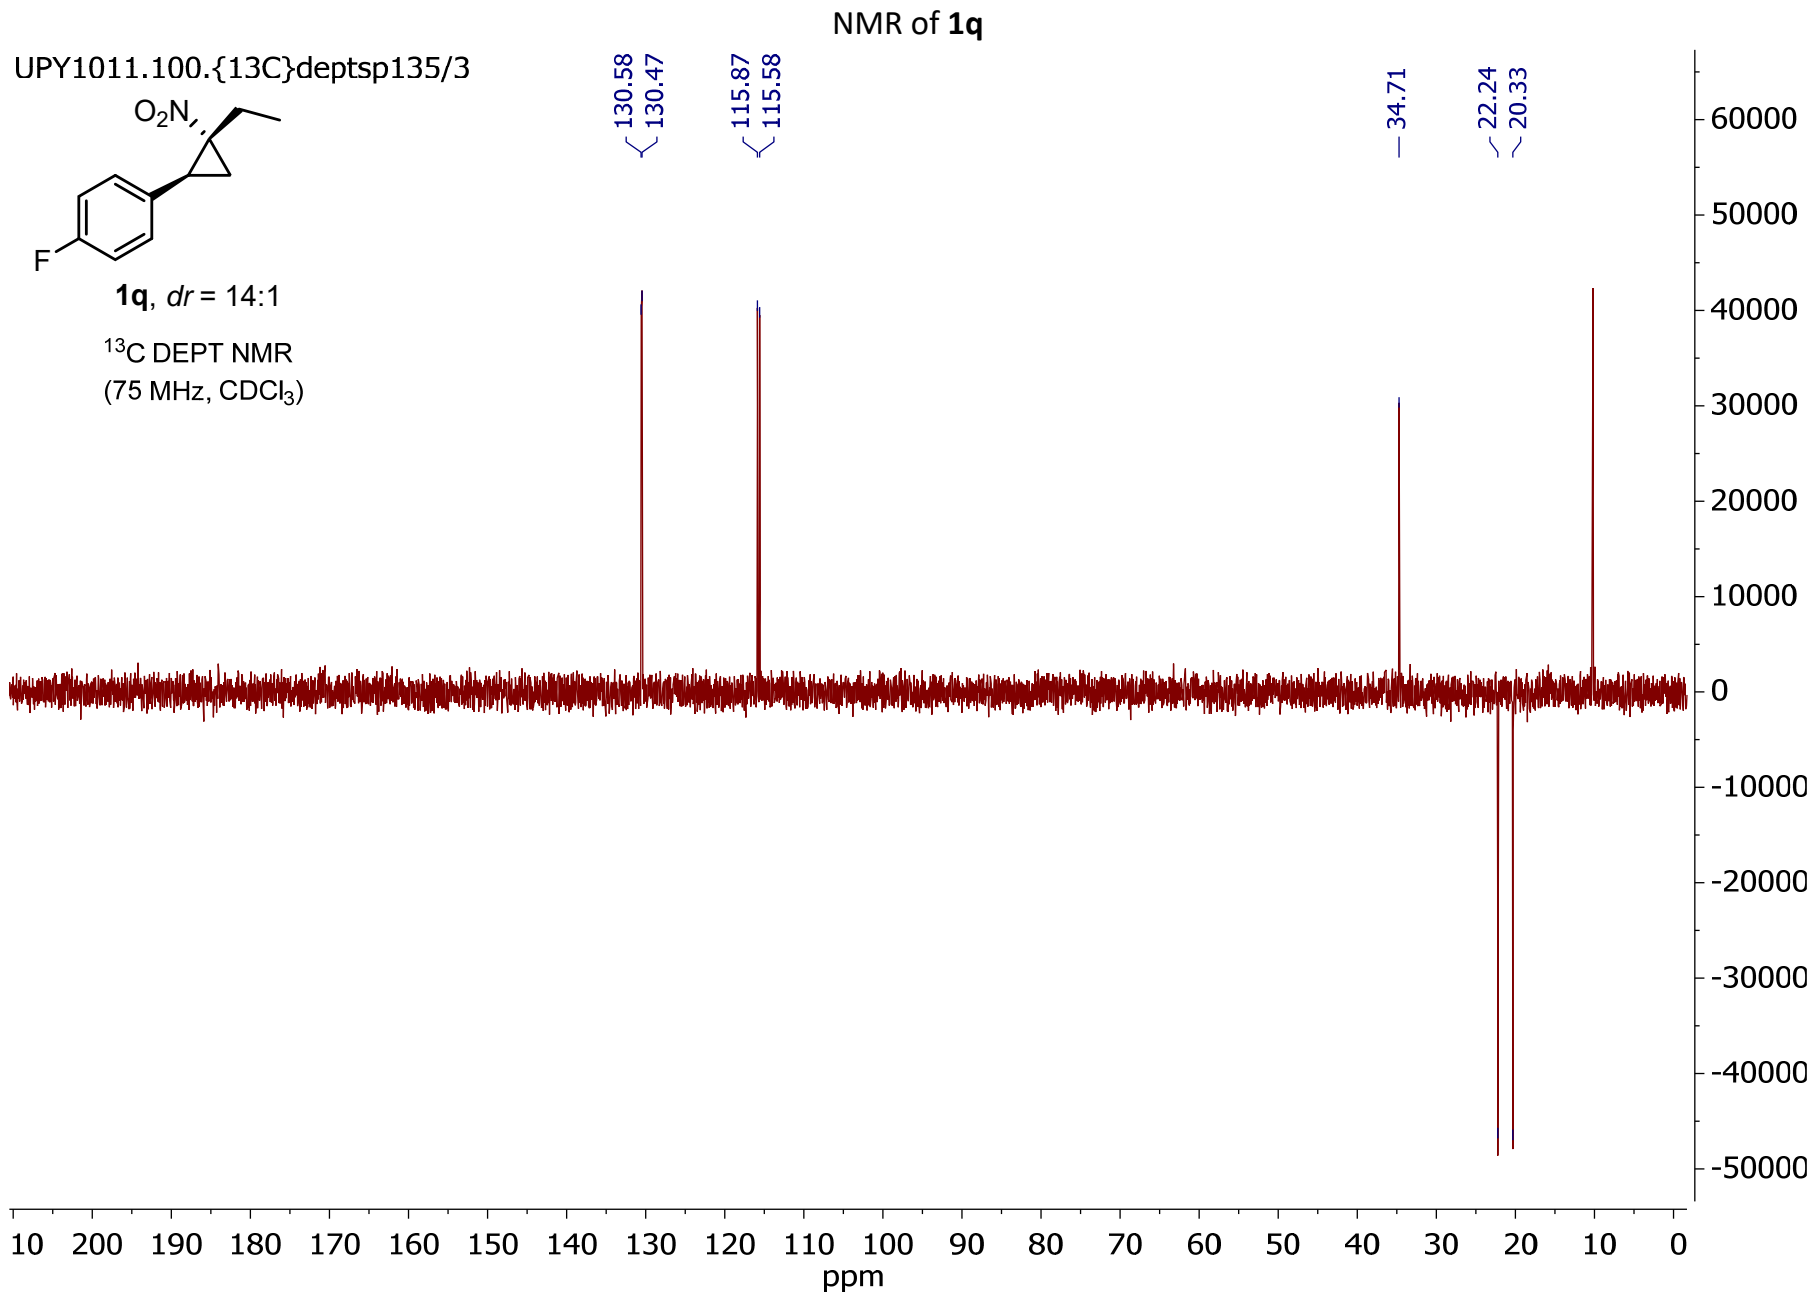

NMR of **1q**

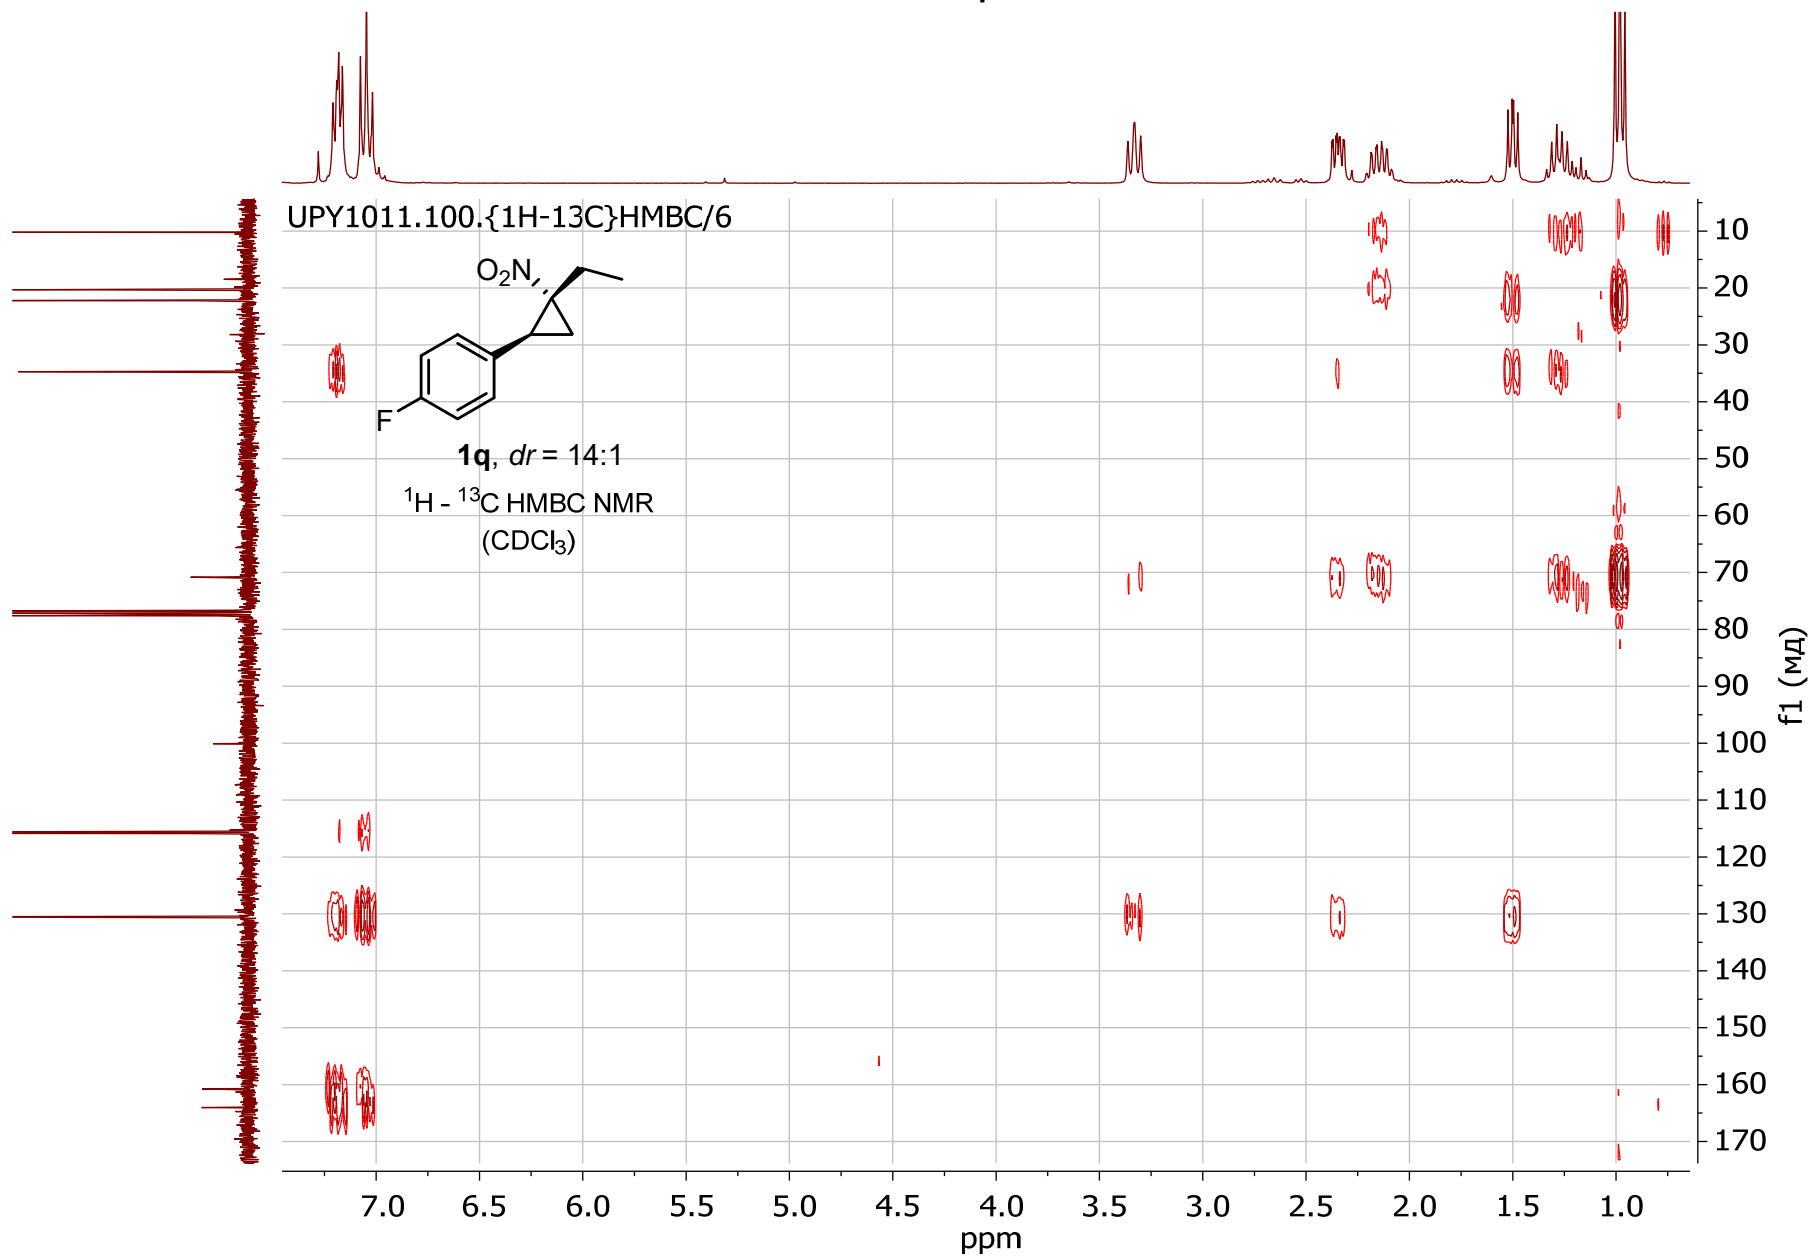

UPY1011.100.{19F}/19

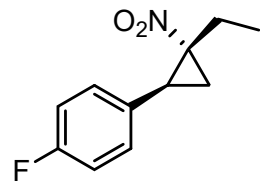

**1q**, *dr* = 14:1

<sup>19</sup>F NMR (282 MHz, CDCl<sub>3</sub>)

NMR of **1q**

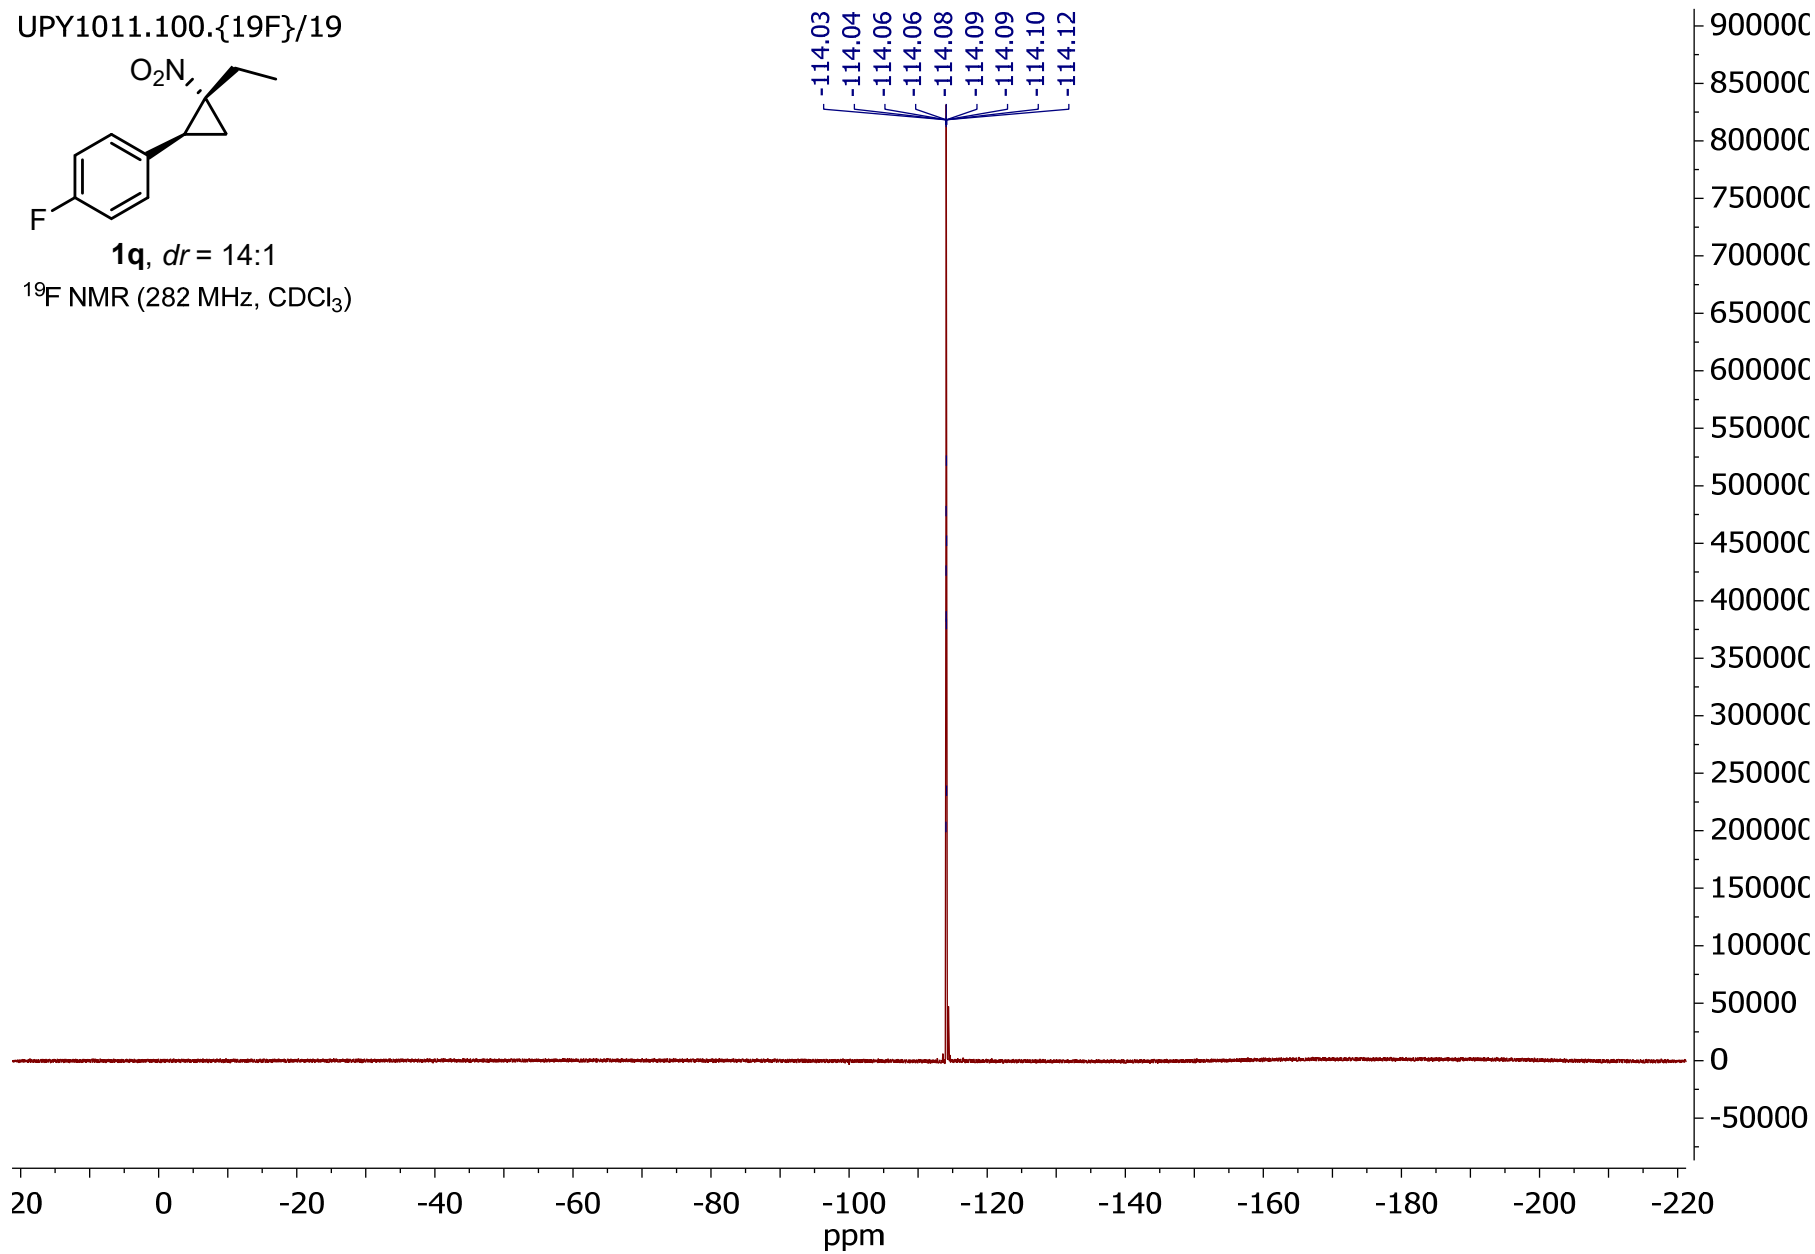

UPY986.101.{1H}/1

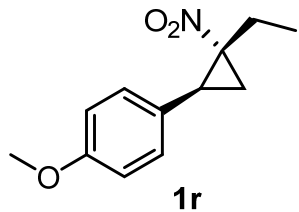

<sup>1</sup>H NMR (300 MHz, CDCl<sub>3</sub>)

NMR of **1r**

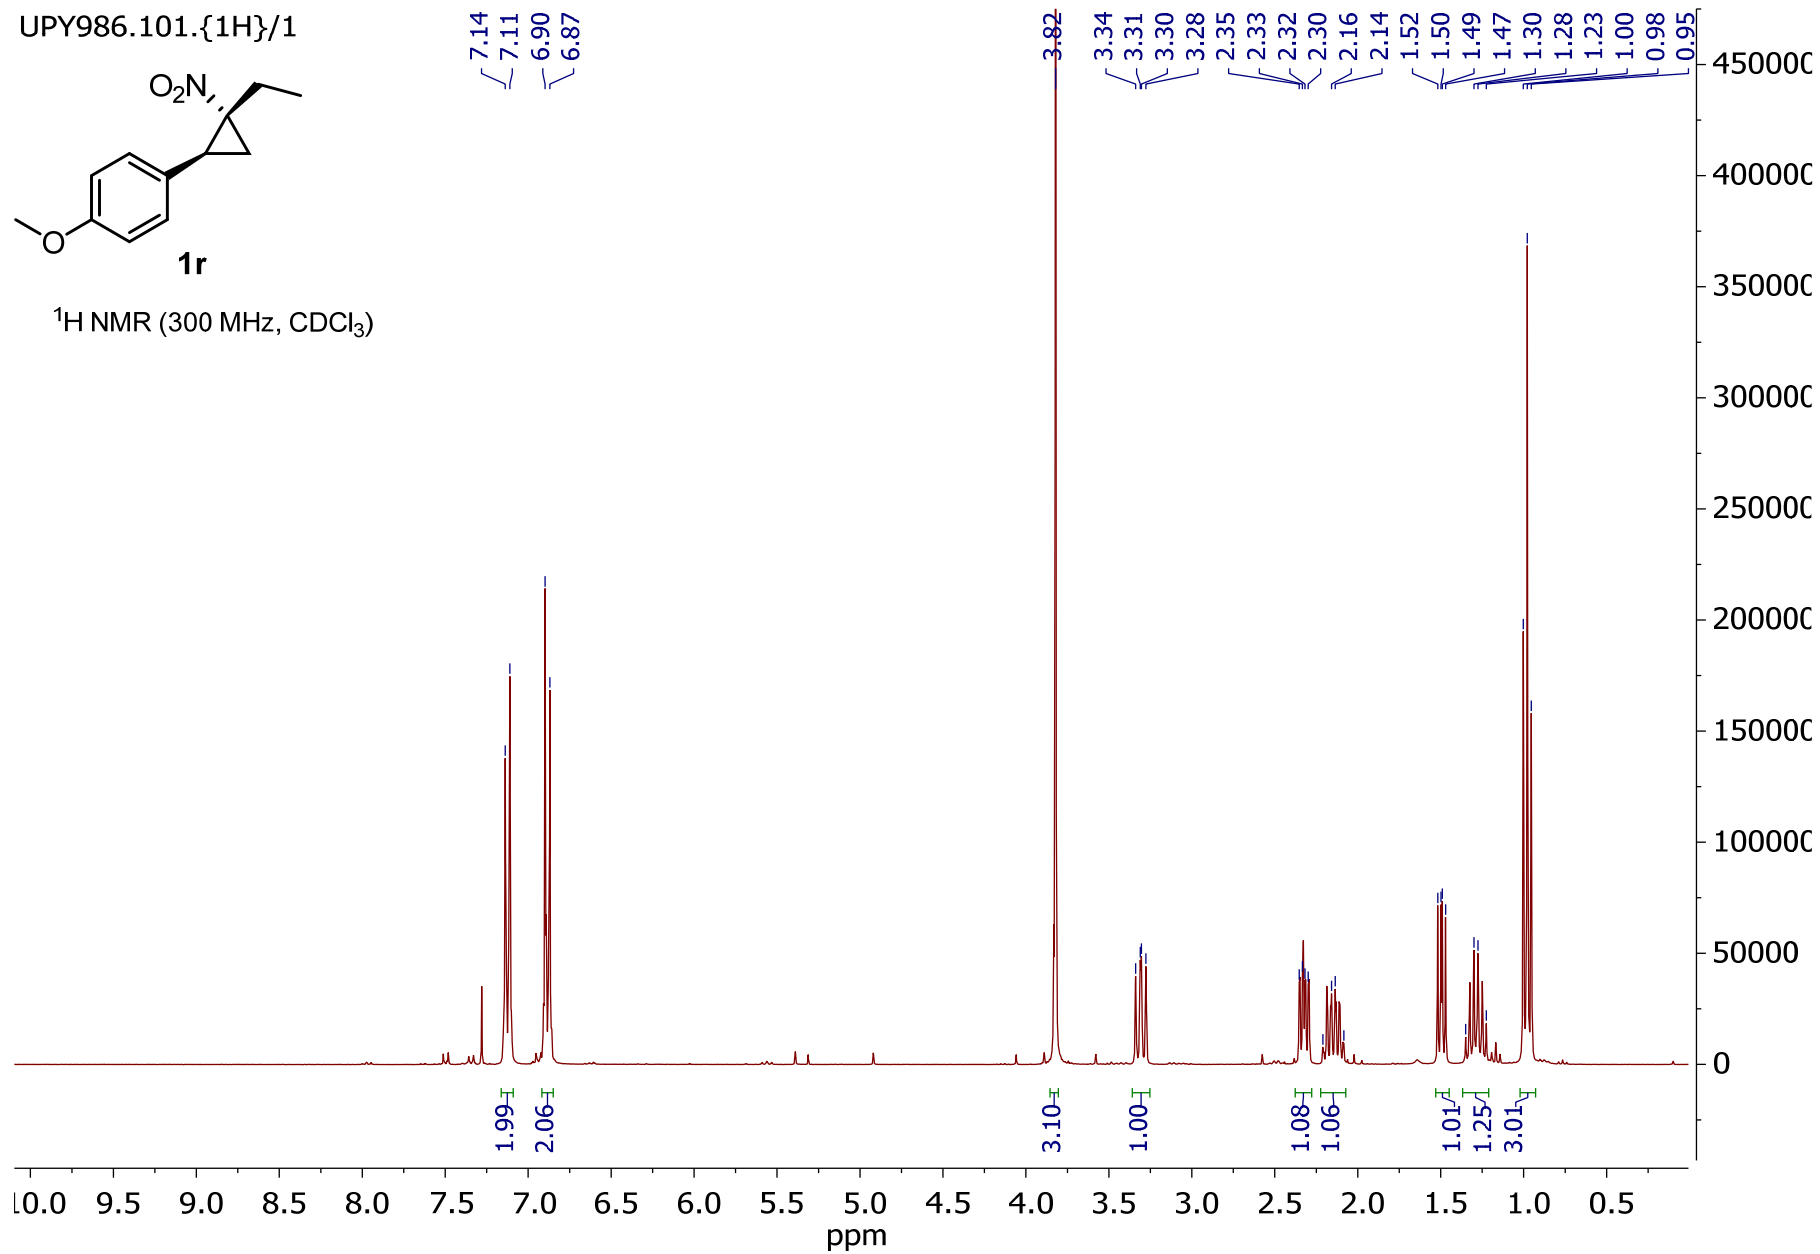

NMR of 1r

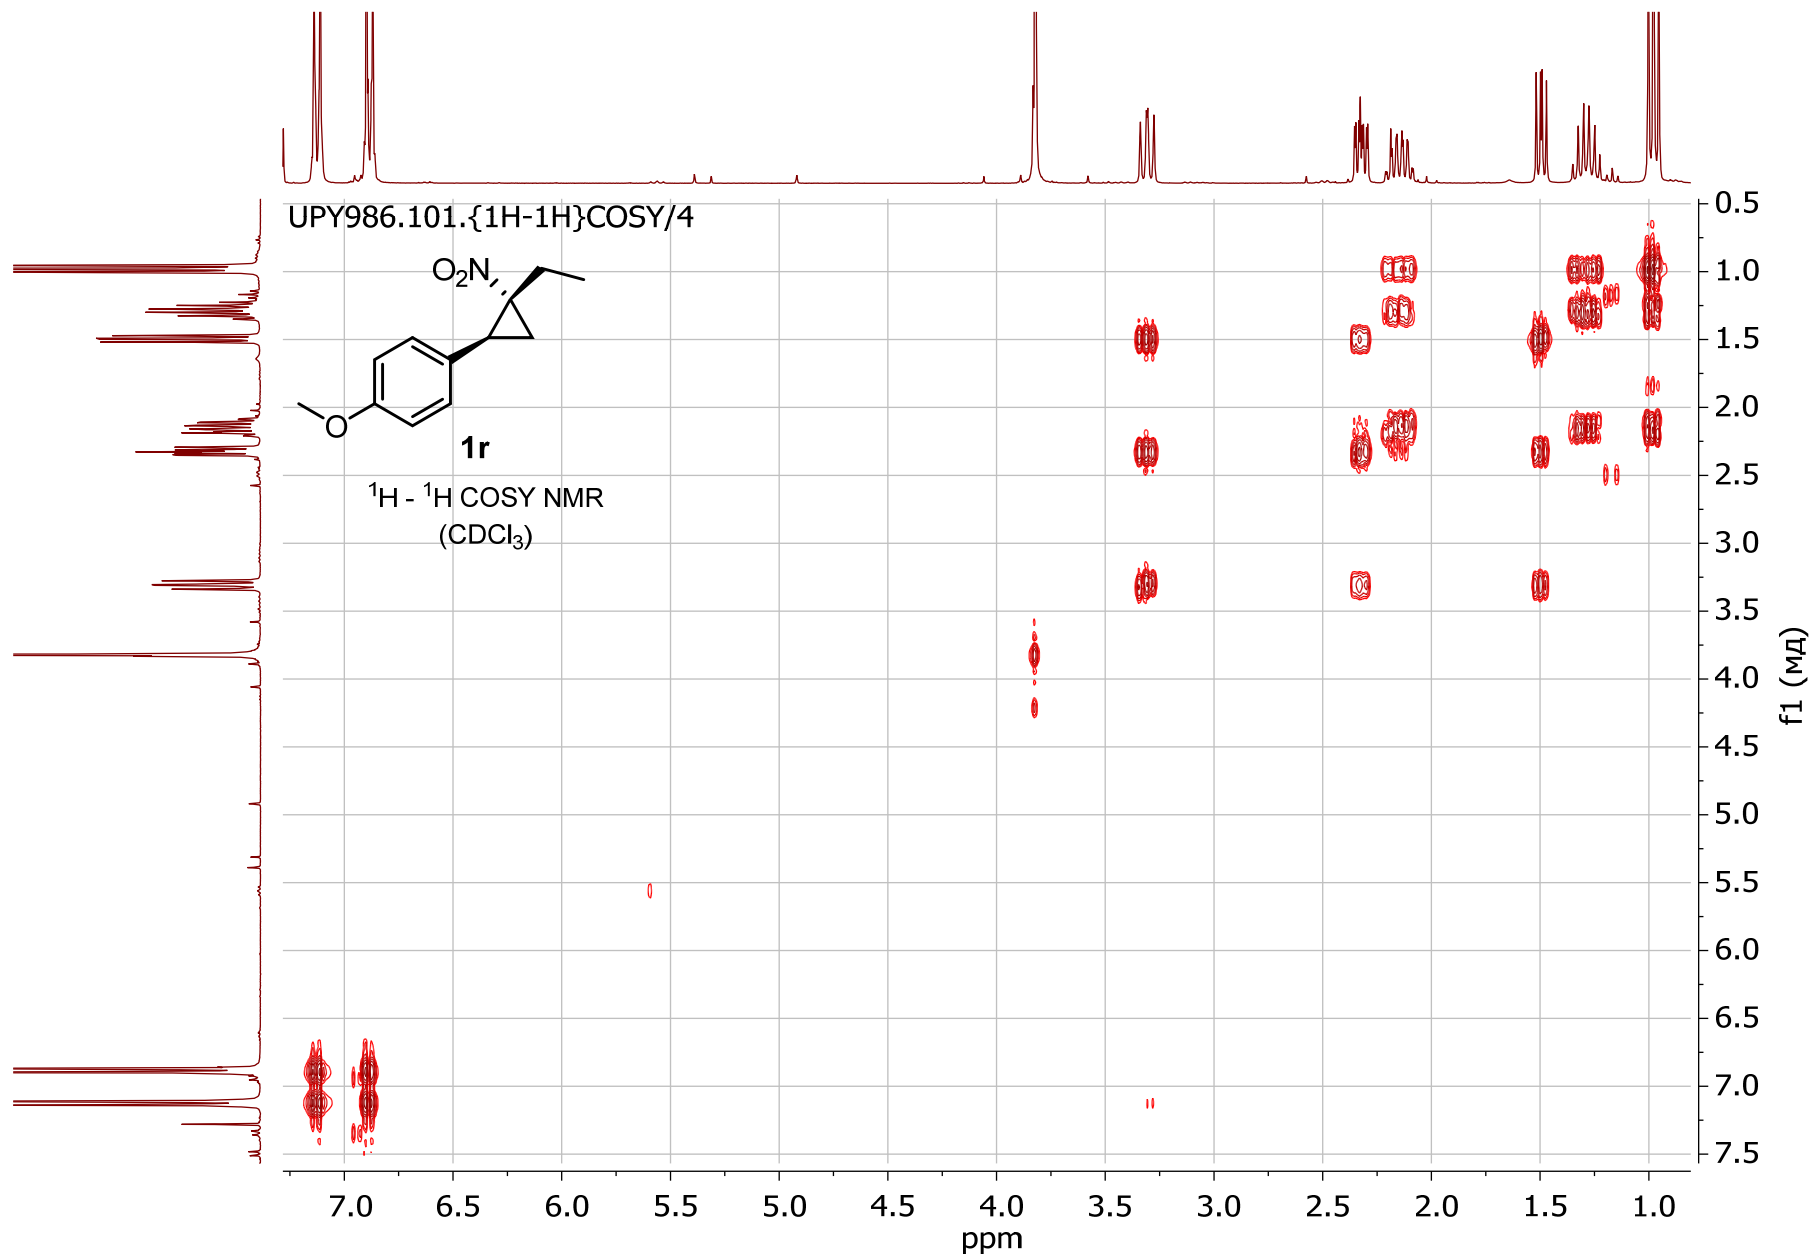



NMR of 1r

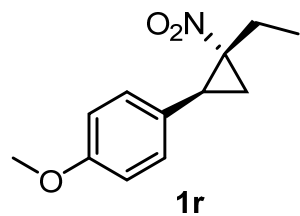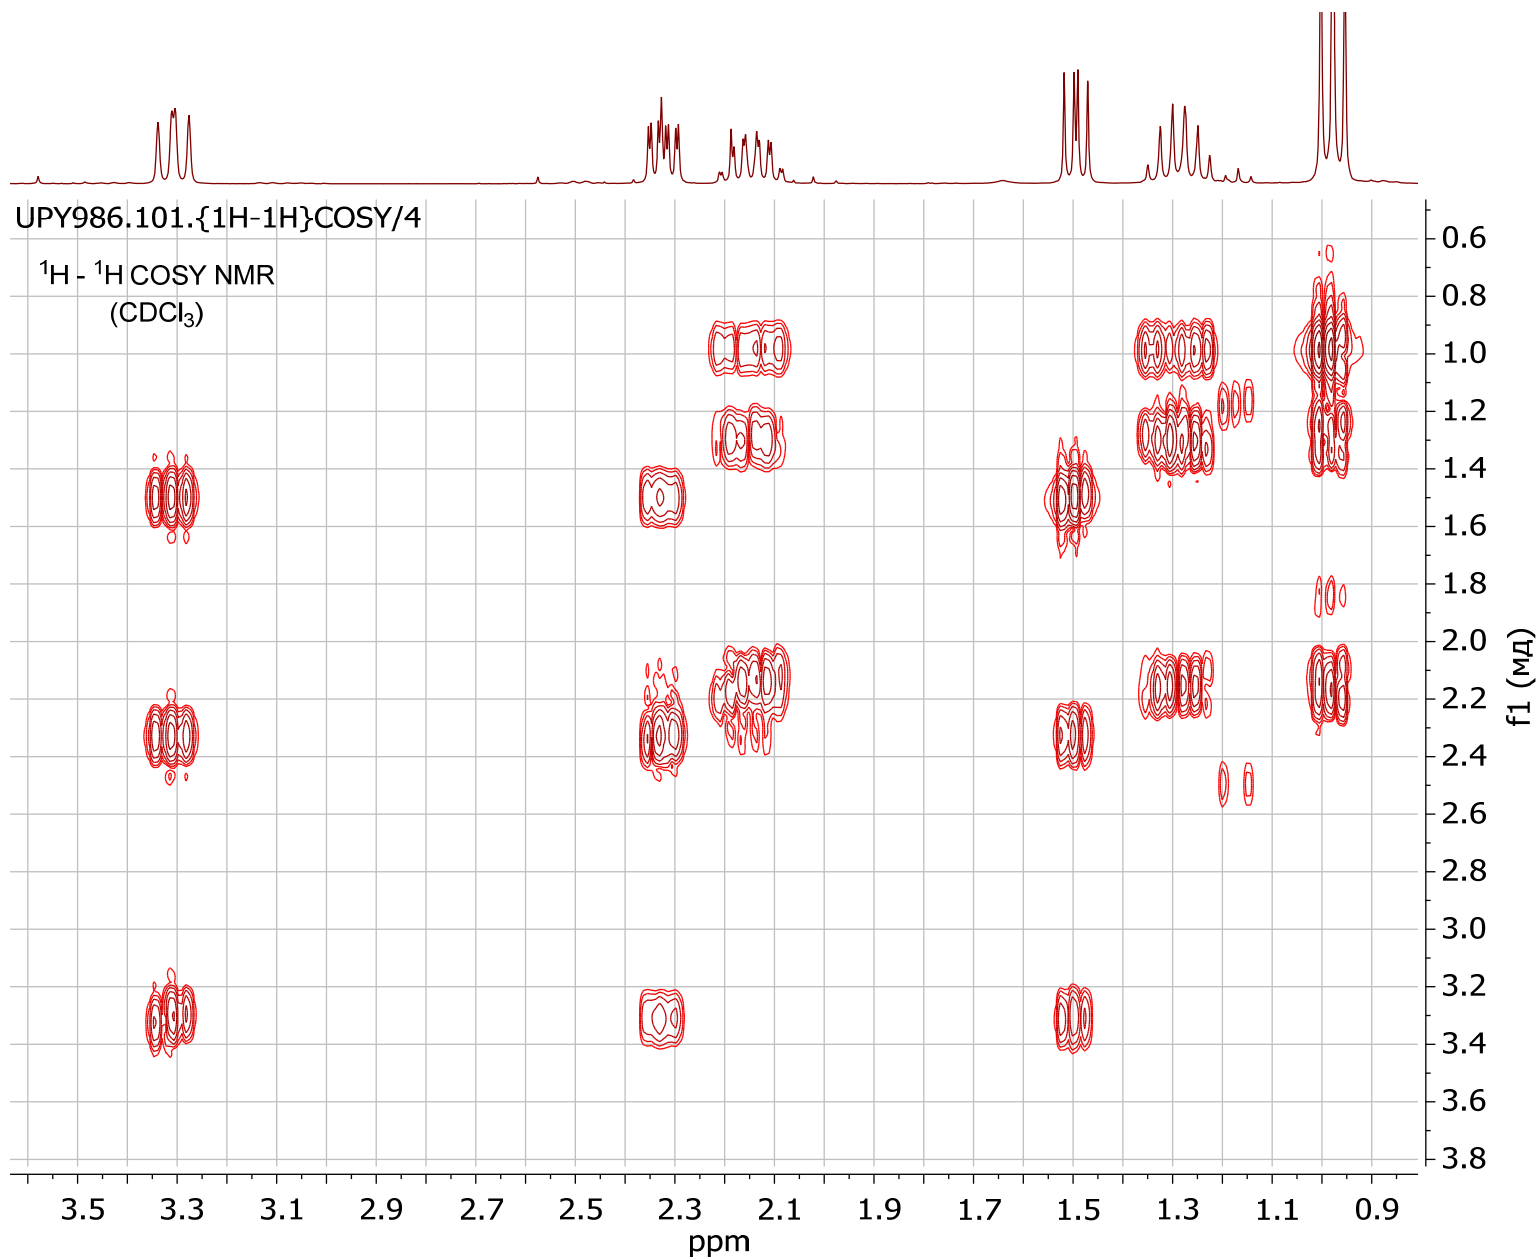

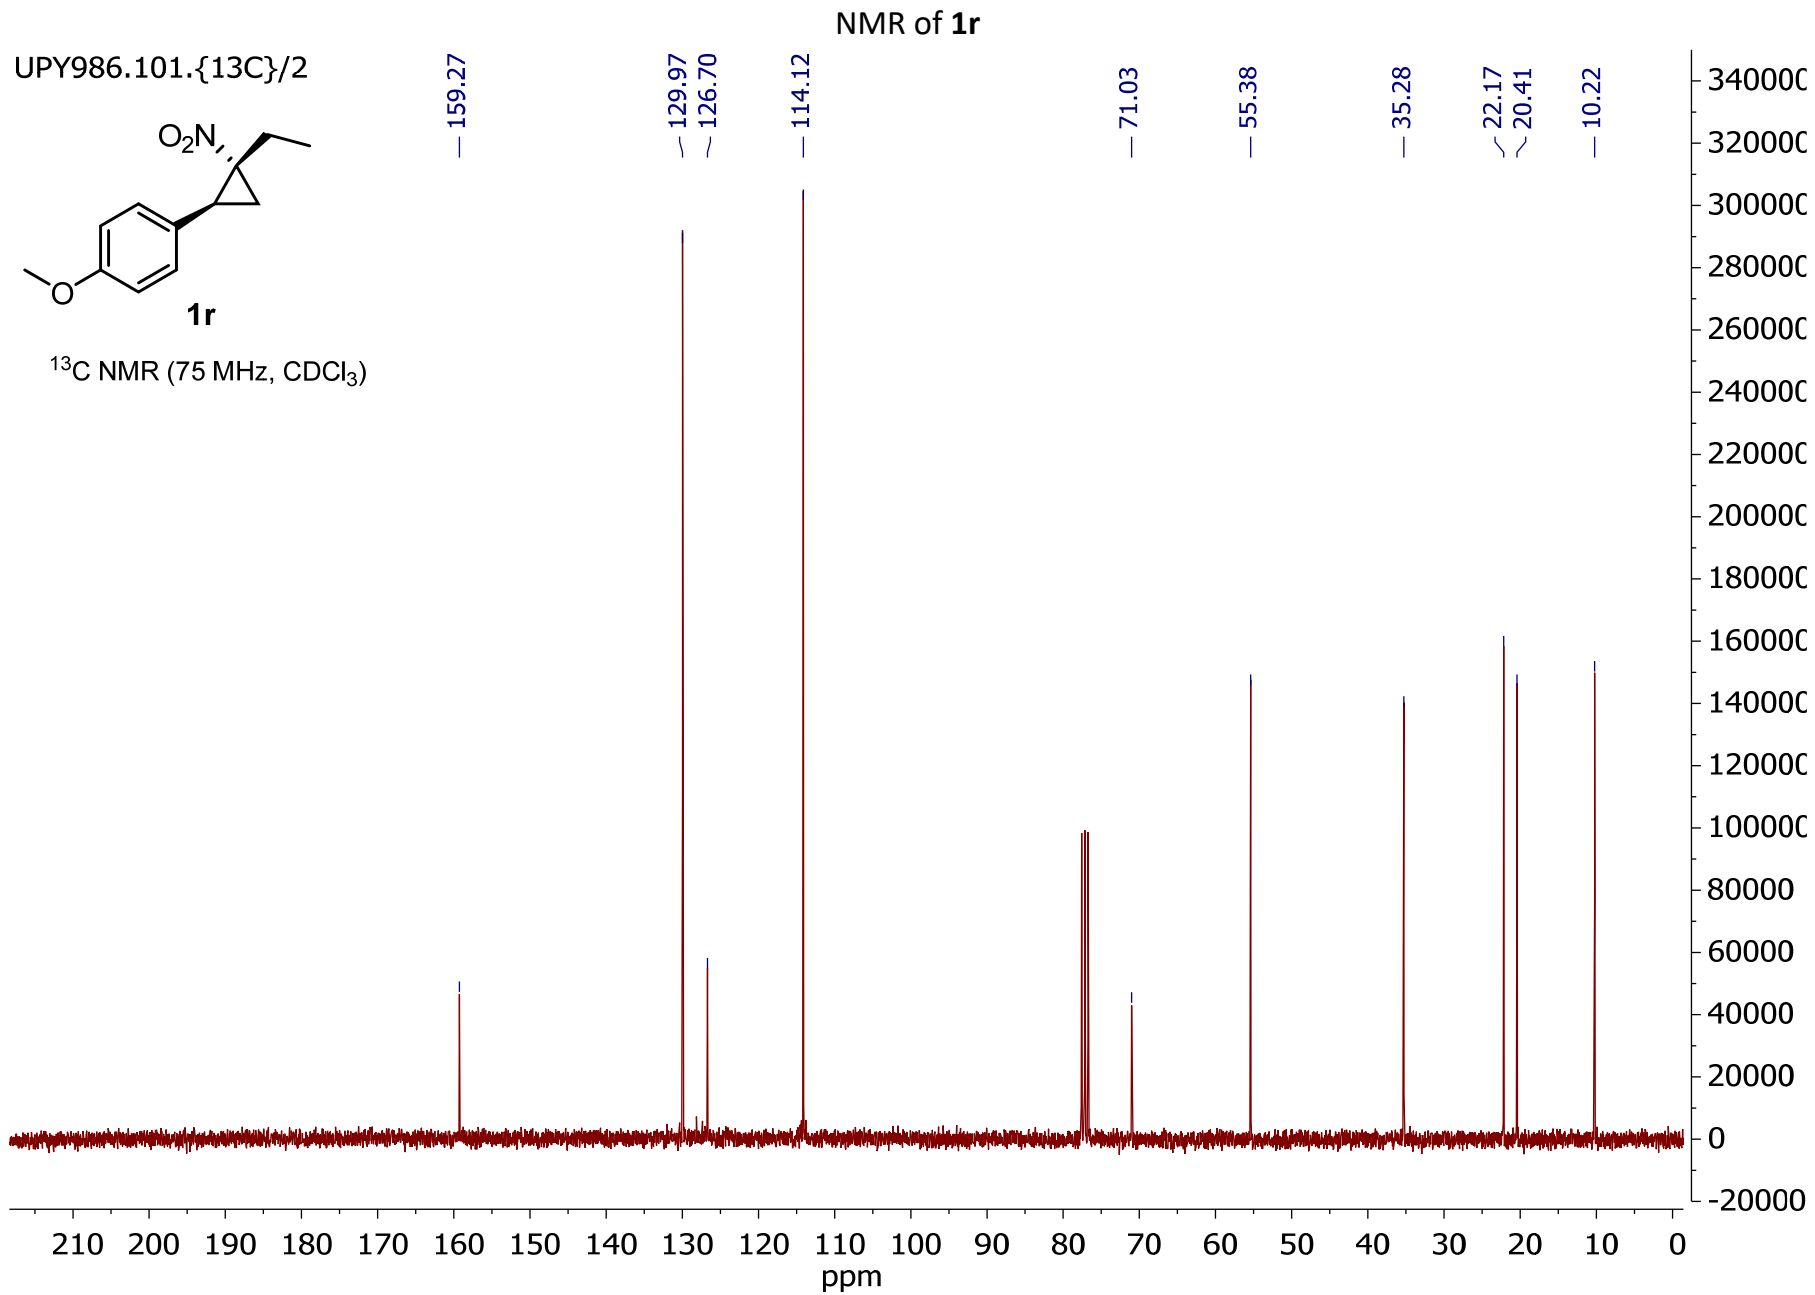

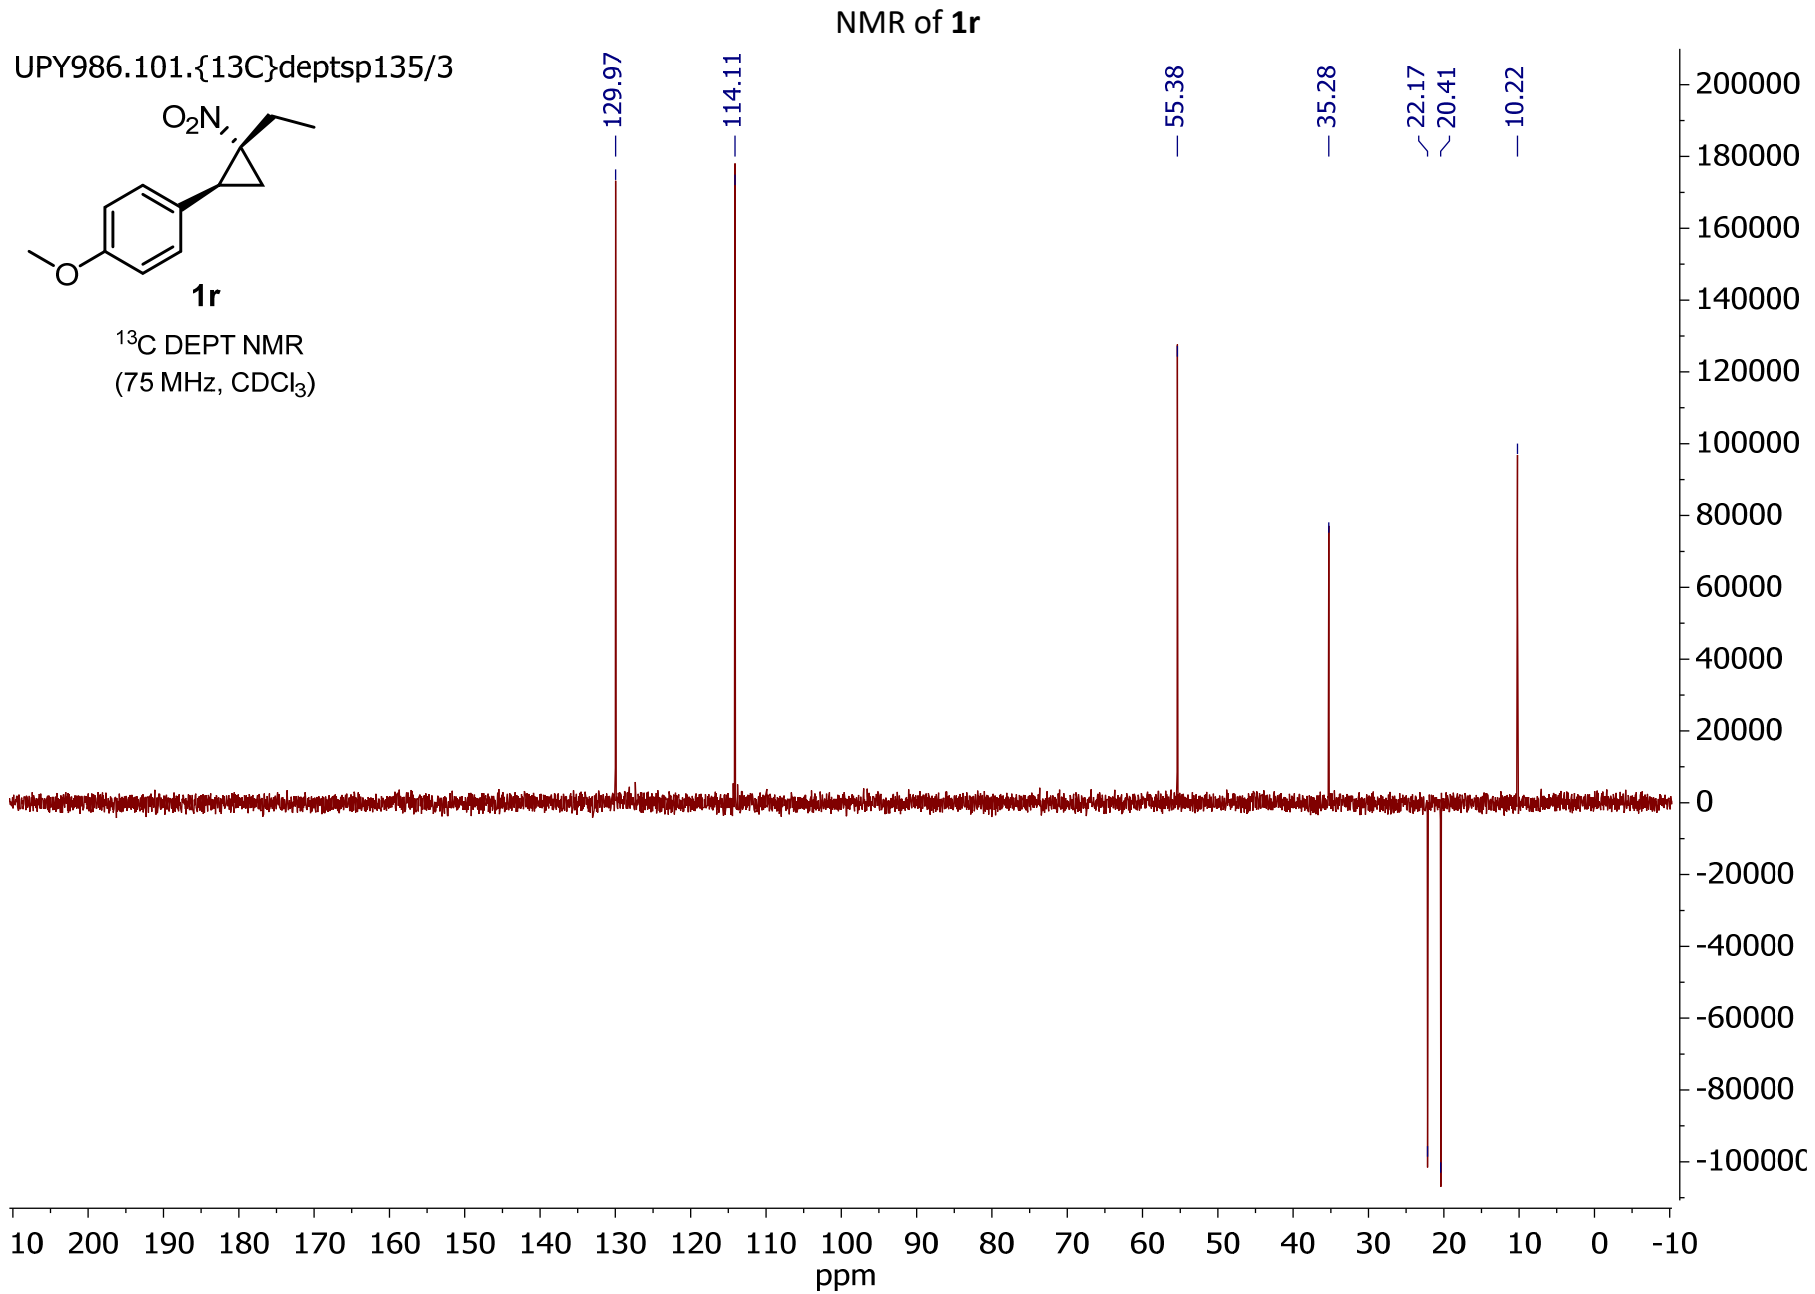

NMR of 1r

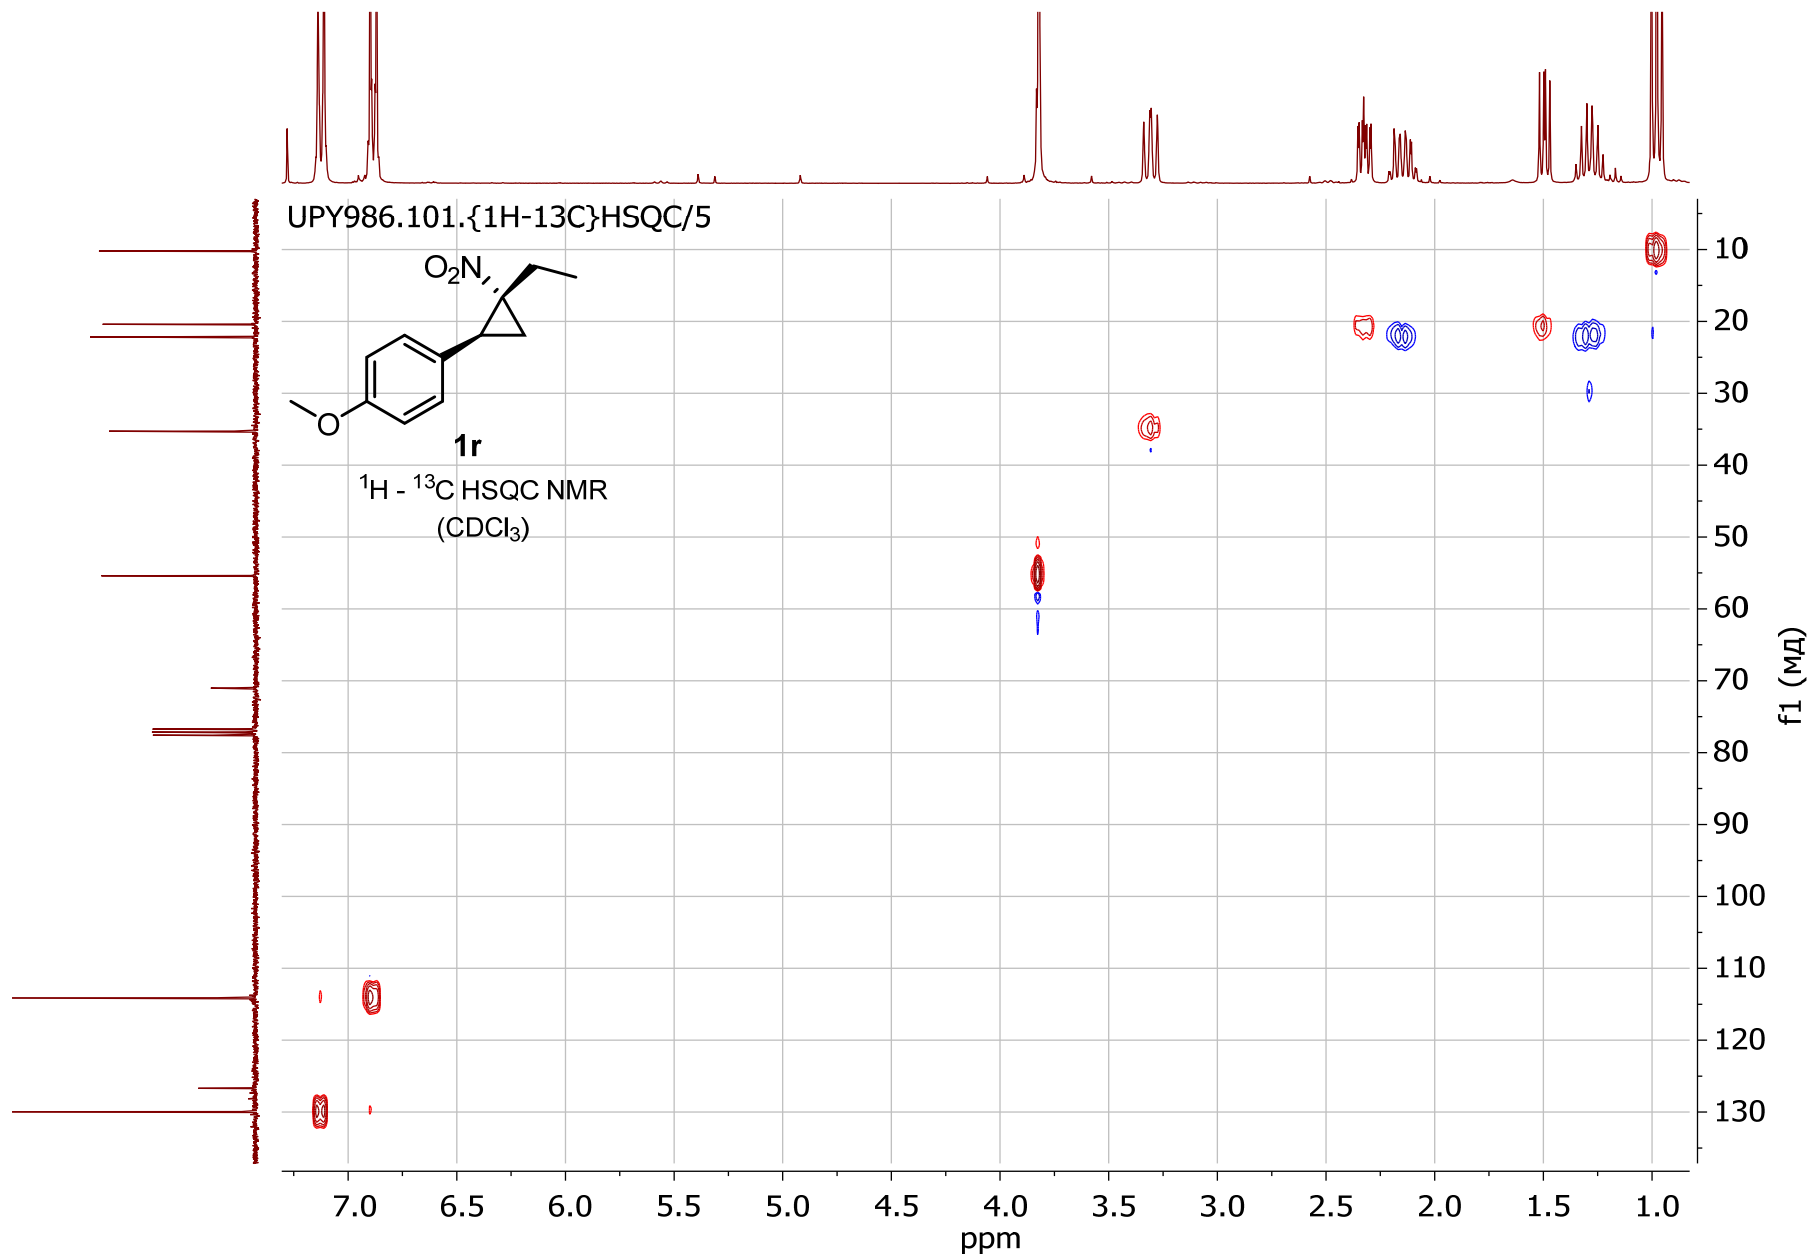

UPY1007.100-1-{1H}/1

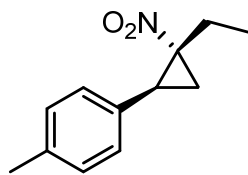

**1s**, *dr* = 17:1

<sup>1</sup>H NMR (300 MHz, CDCl<sub>3</sub>)

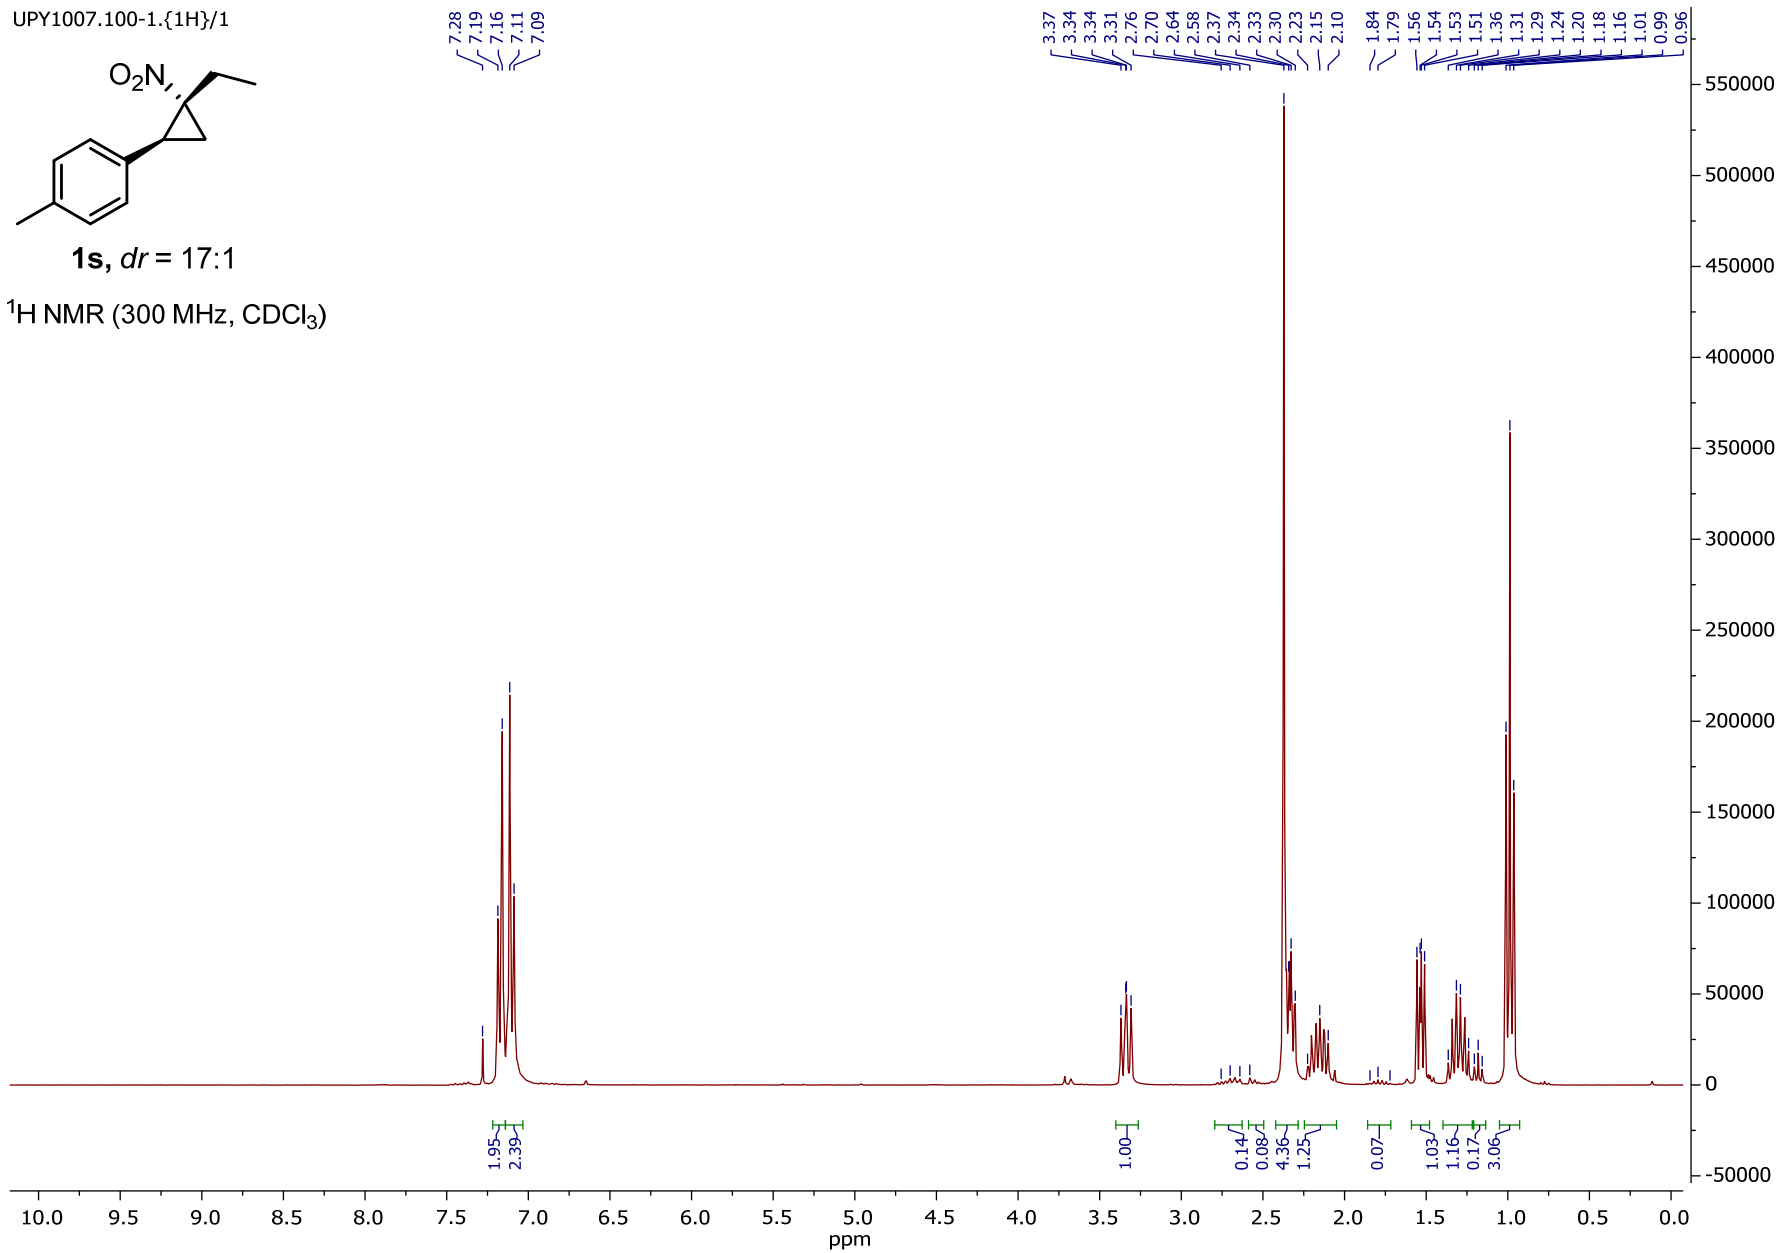

NMR of **1s**

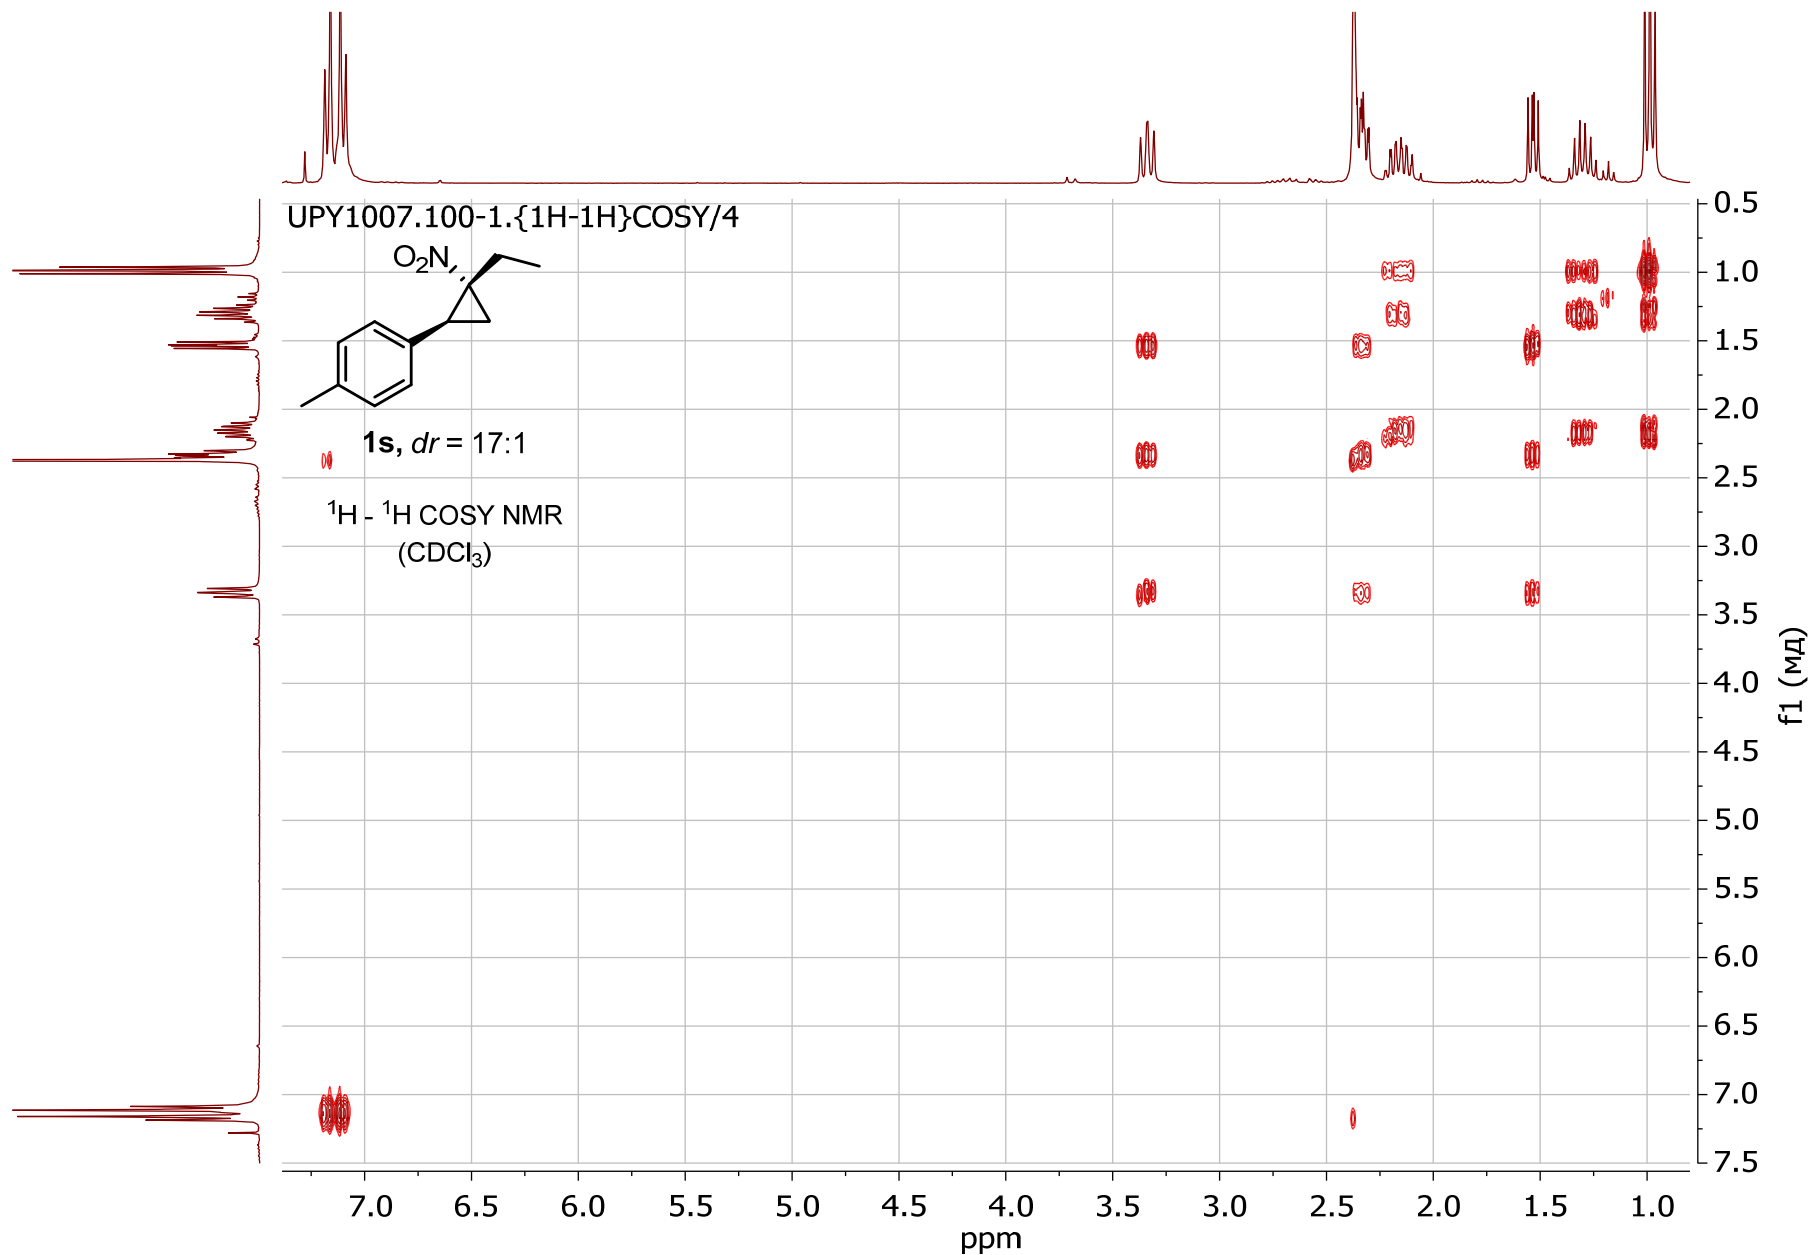

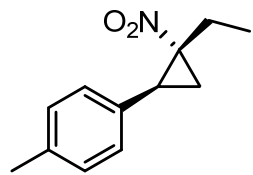

1s, dr = 17:1

### NMR of 1s

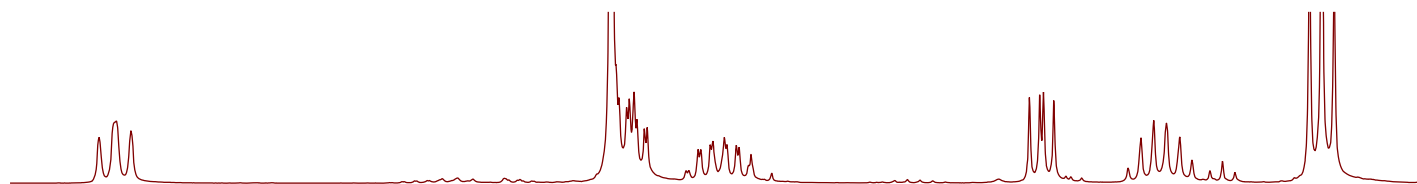

UPY1007.100-1.{1H-1H}COSY/4

<sup>1</sup>H - <sup>1</sup>H COSY NMR  
(CDCl<sub>3</sub>)

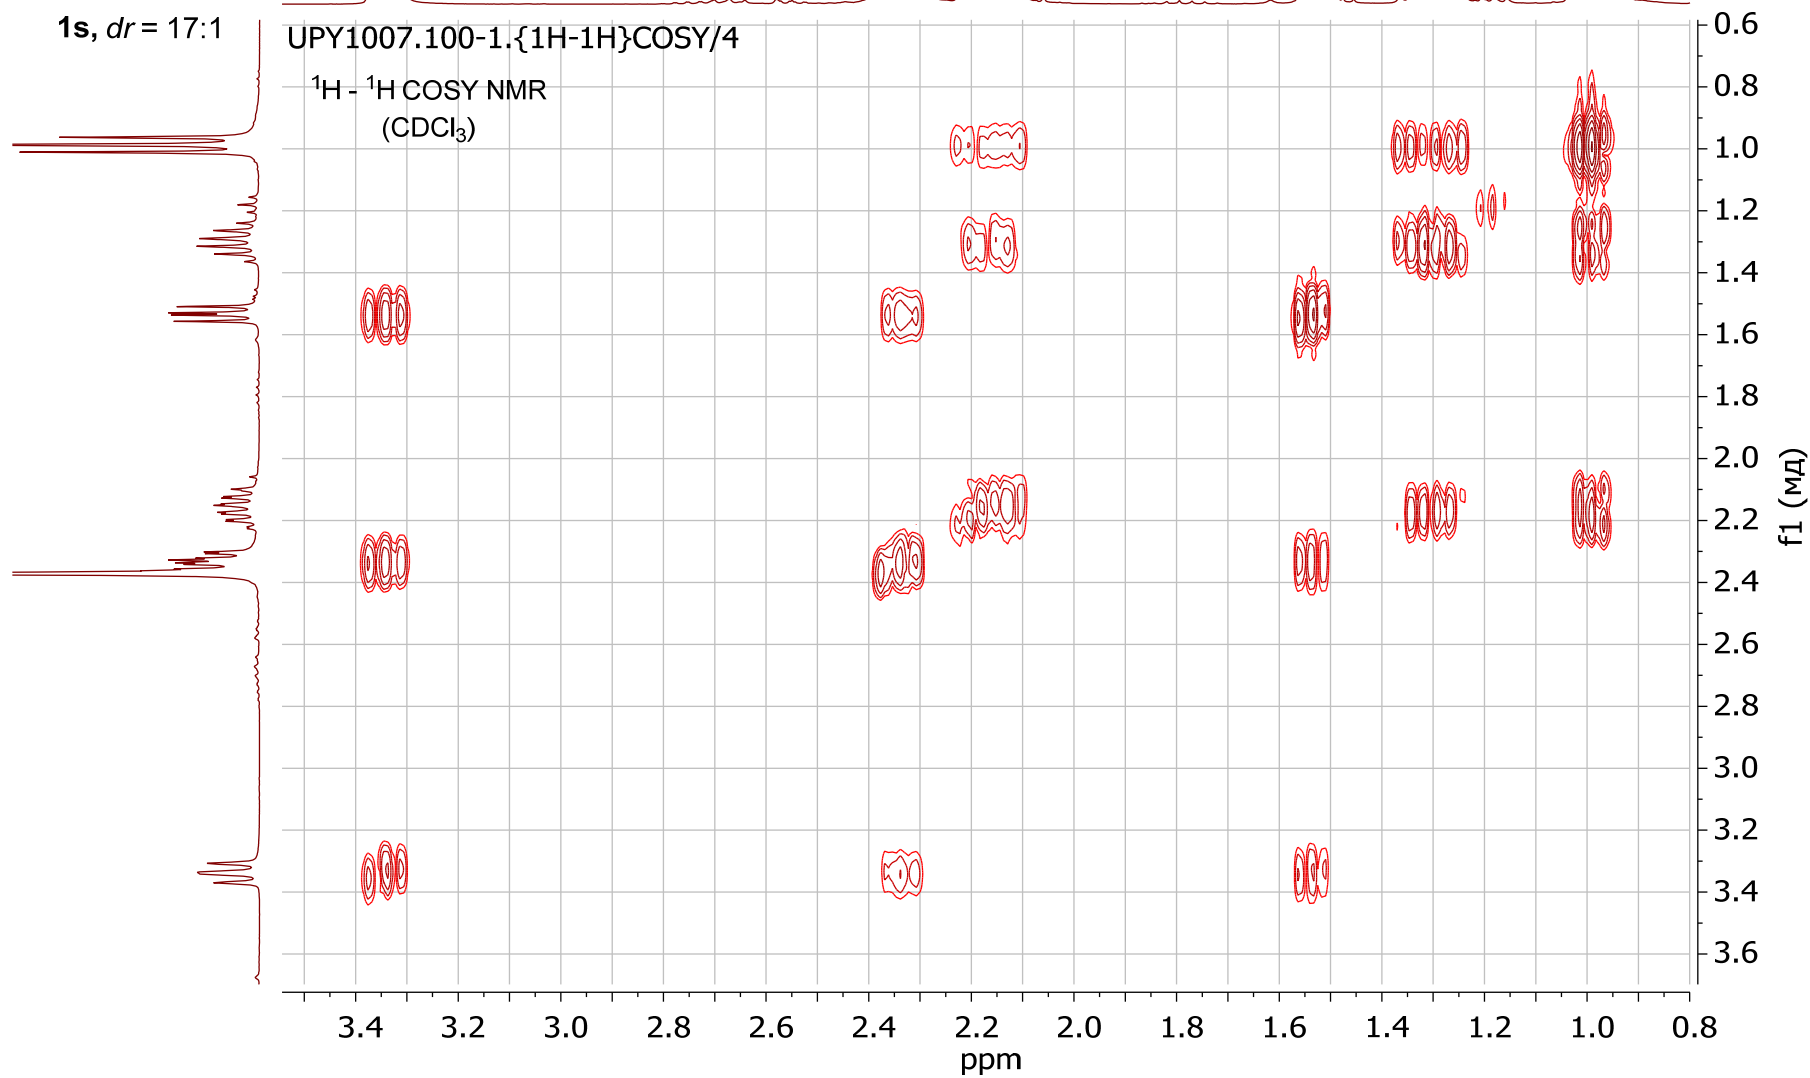

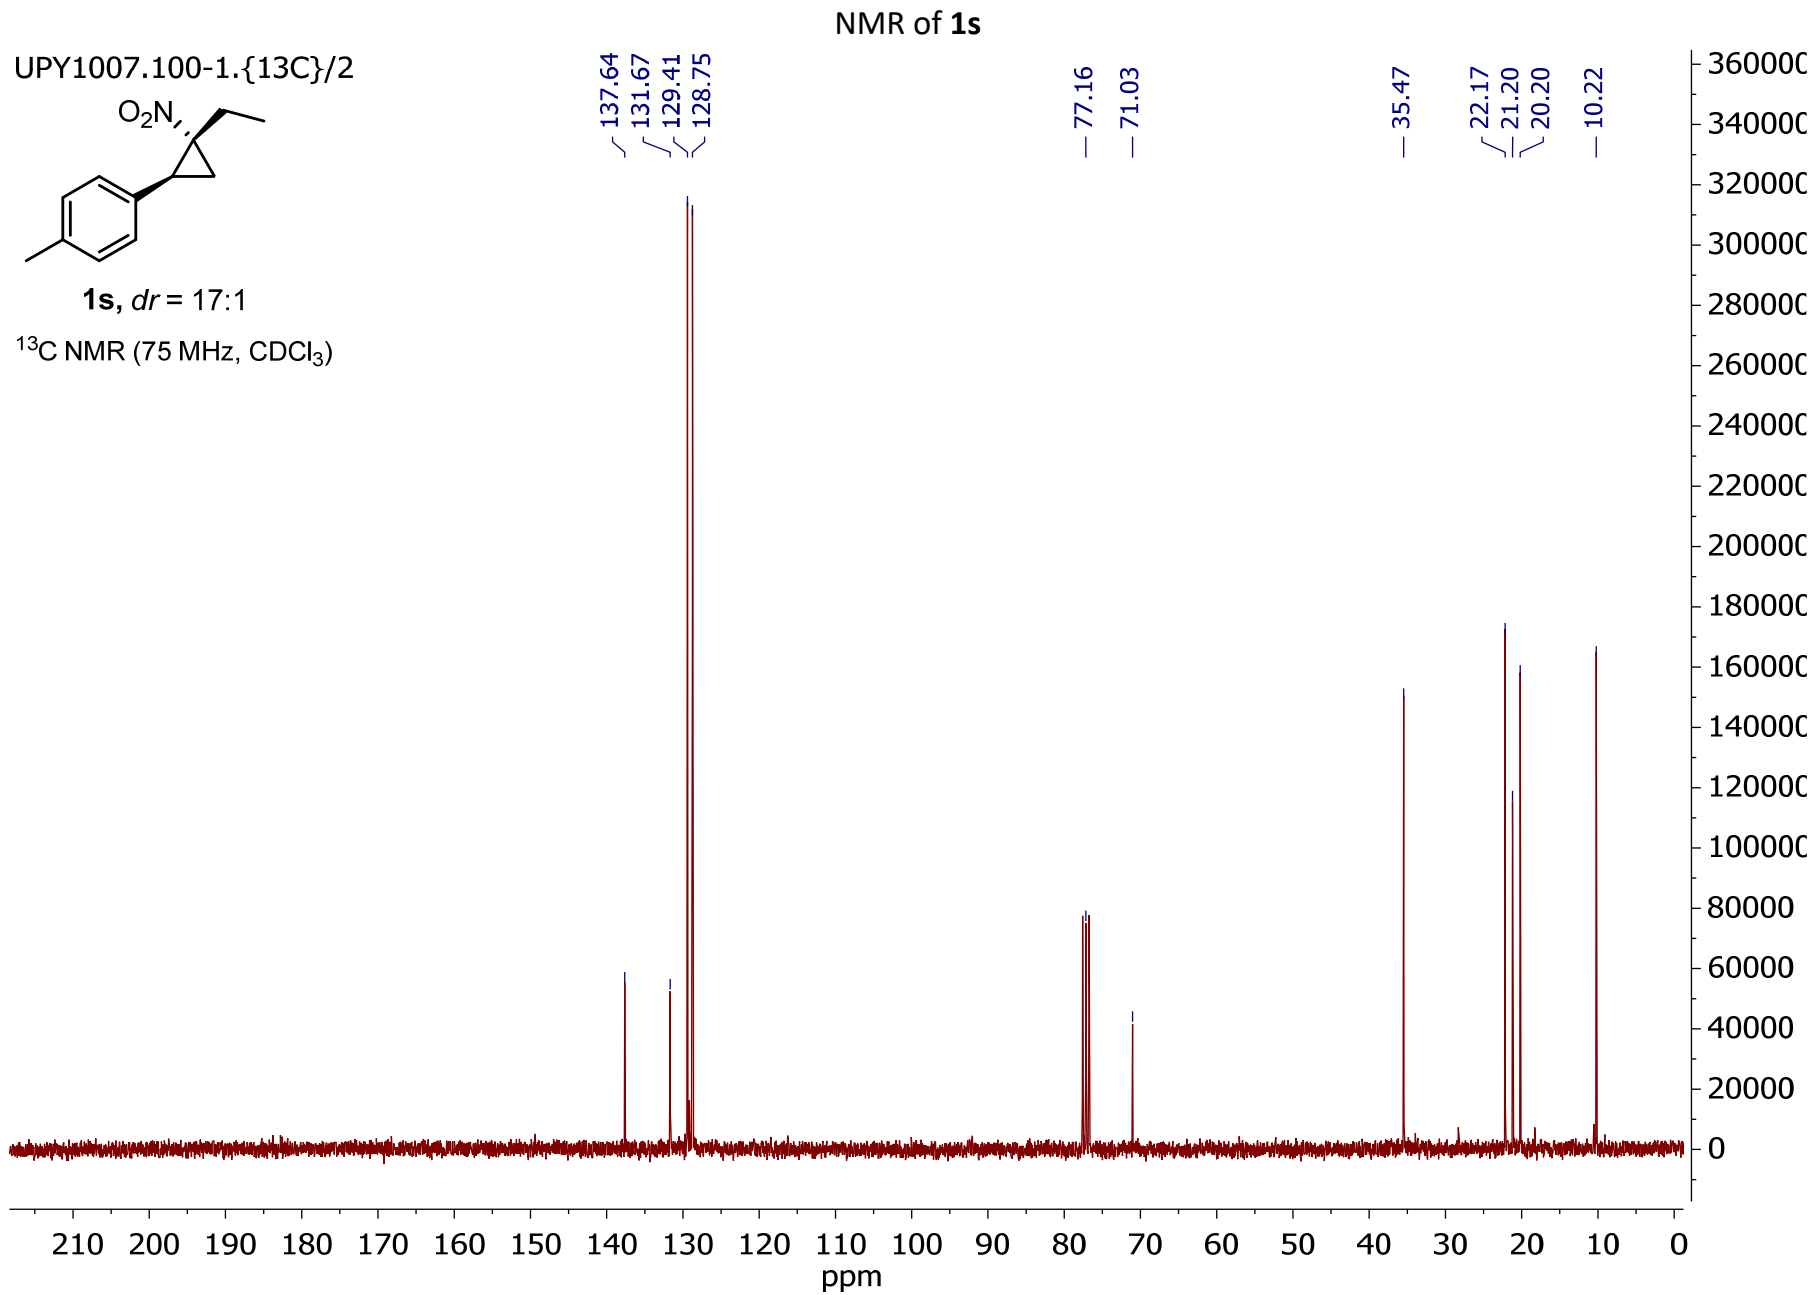



NMR of **1s**

UPY1007.100-1.<sup>13</sup>Cdeptsp135/3

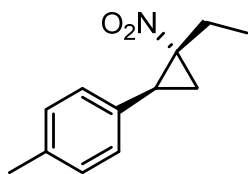

**1s**, *dr* = 17:1

<sup>13</sup>C DEPT NMR  
(75 MHz, CDCl<sub>3</sub>)

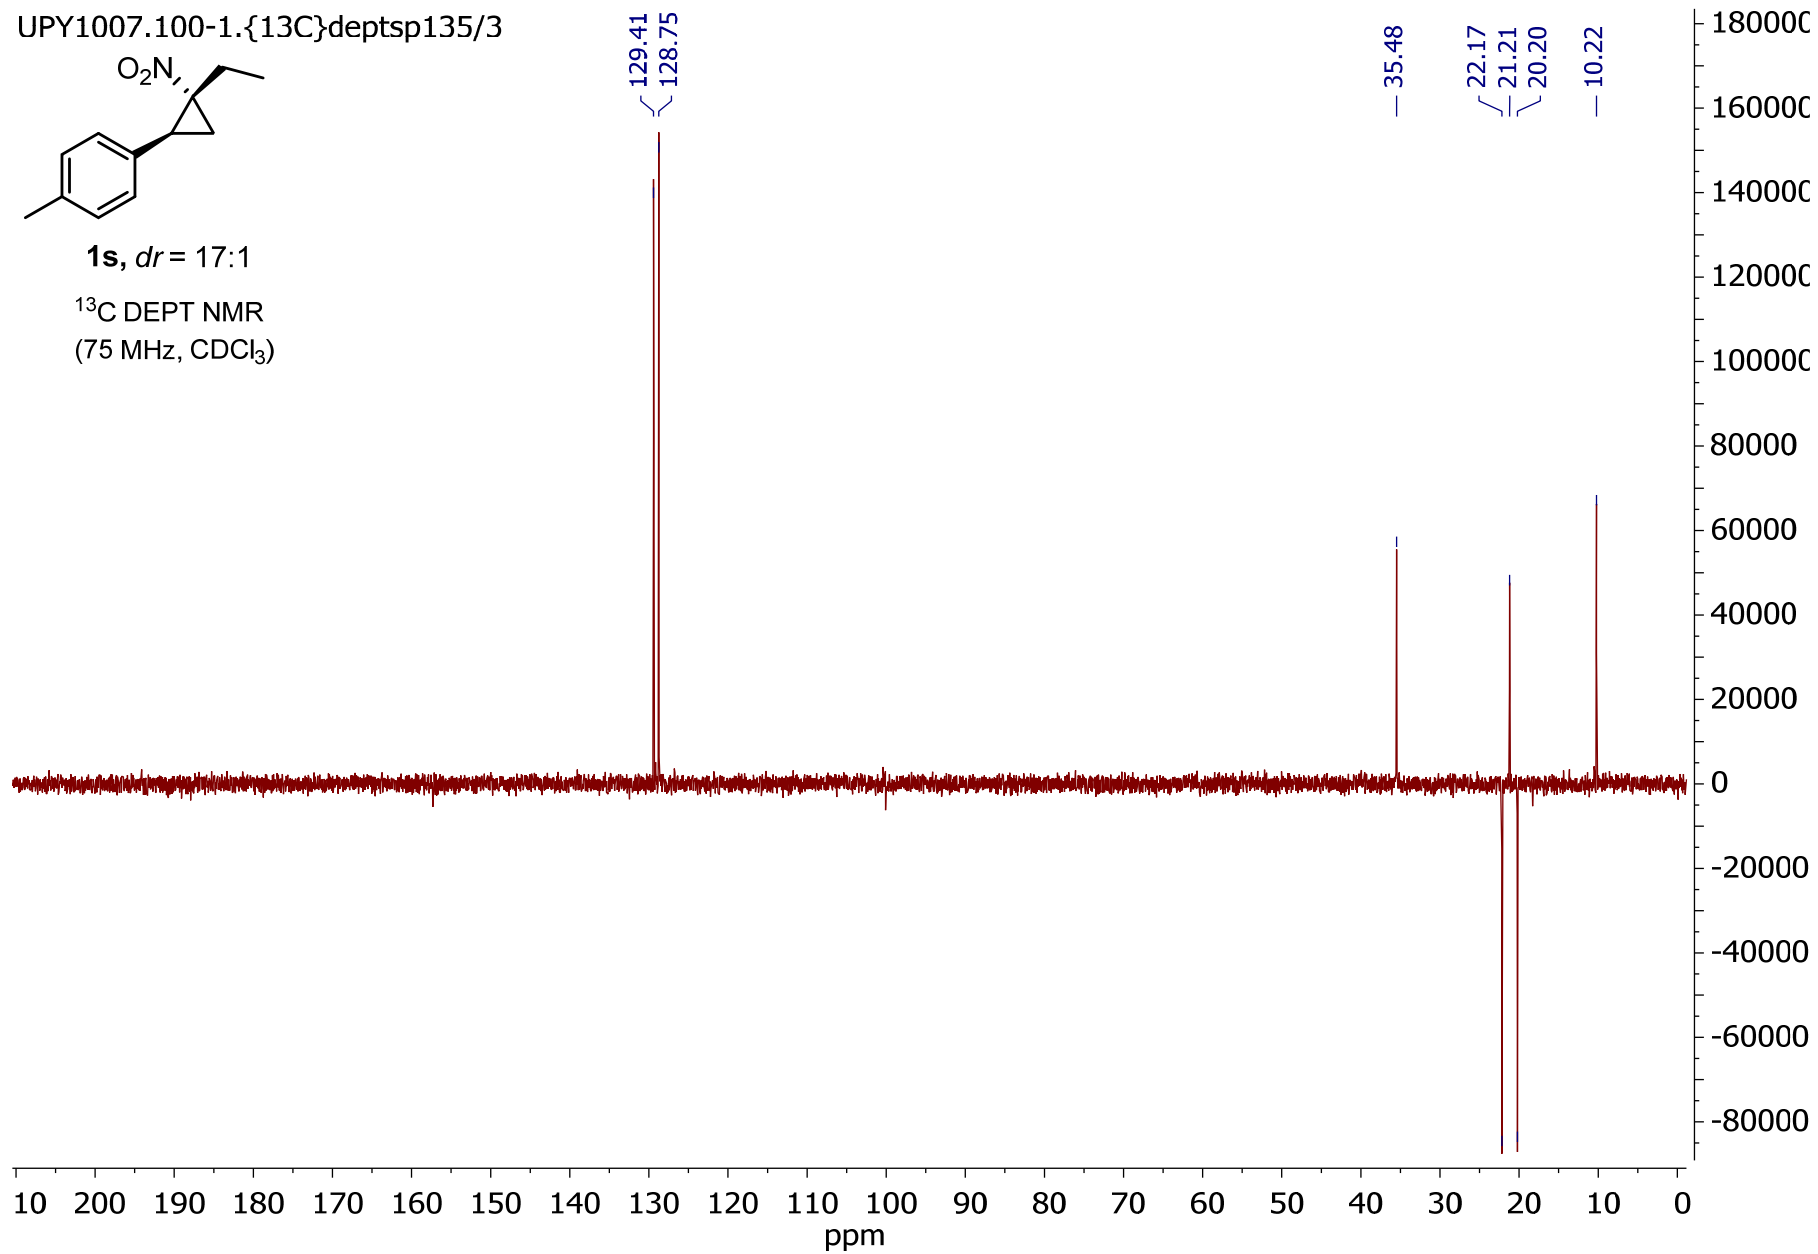

NMR of **1s**

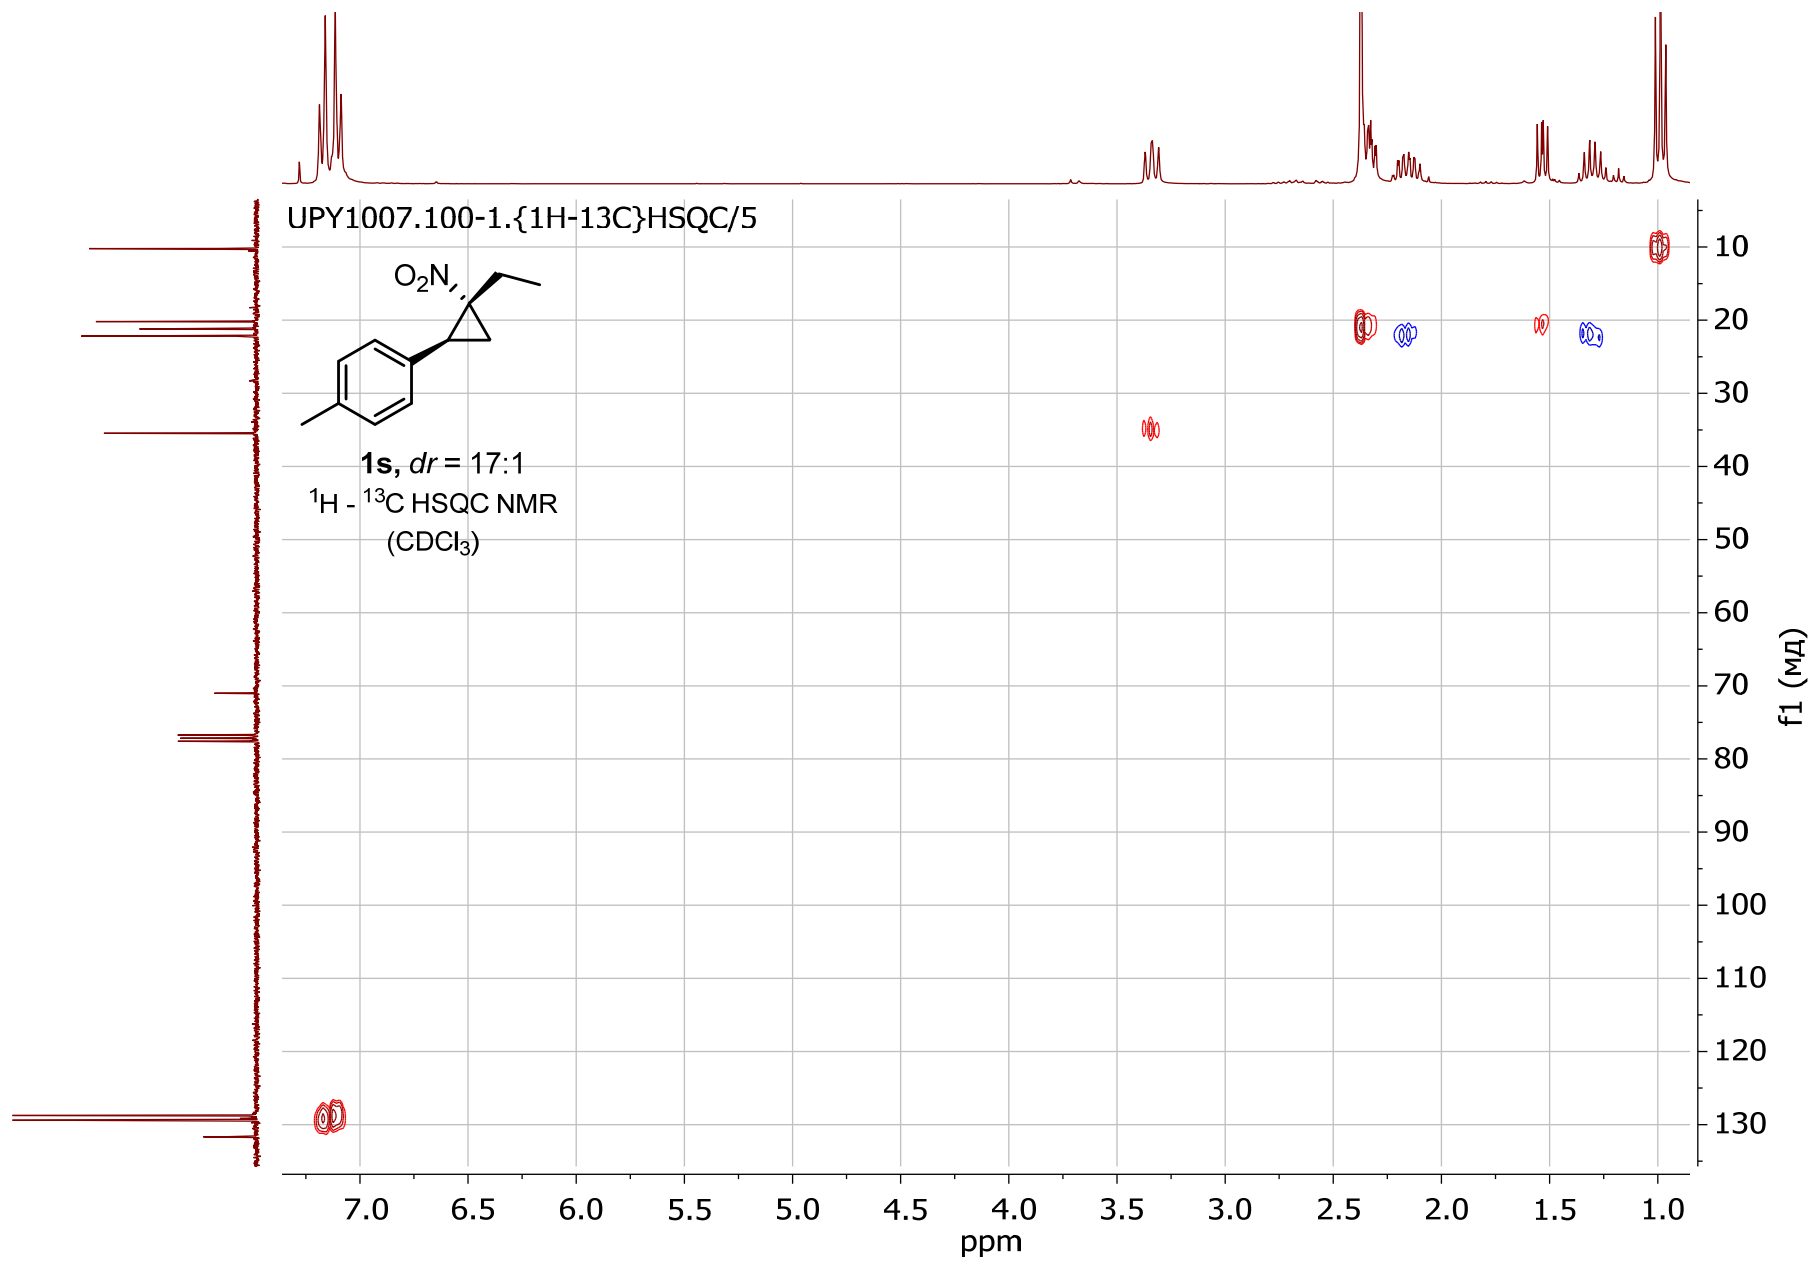

NMR of **1s**

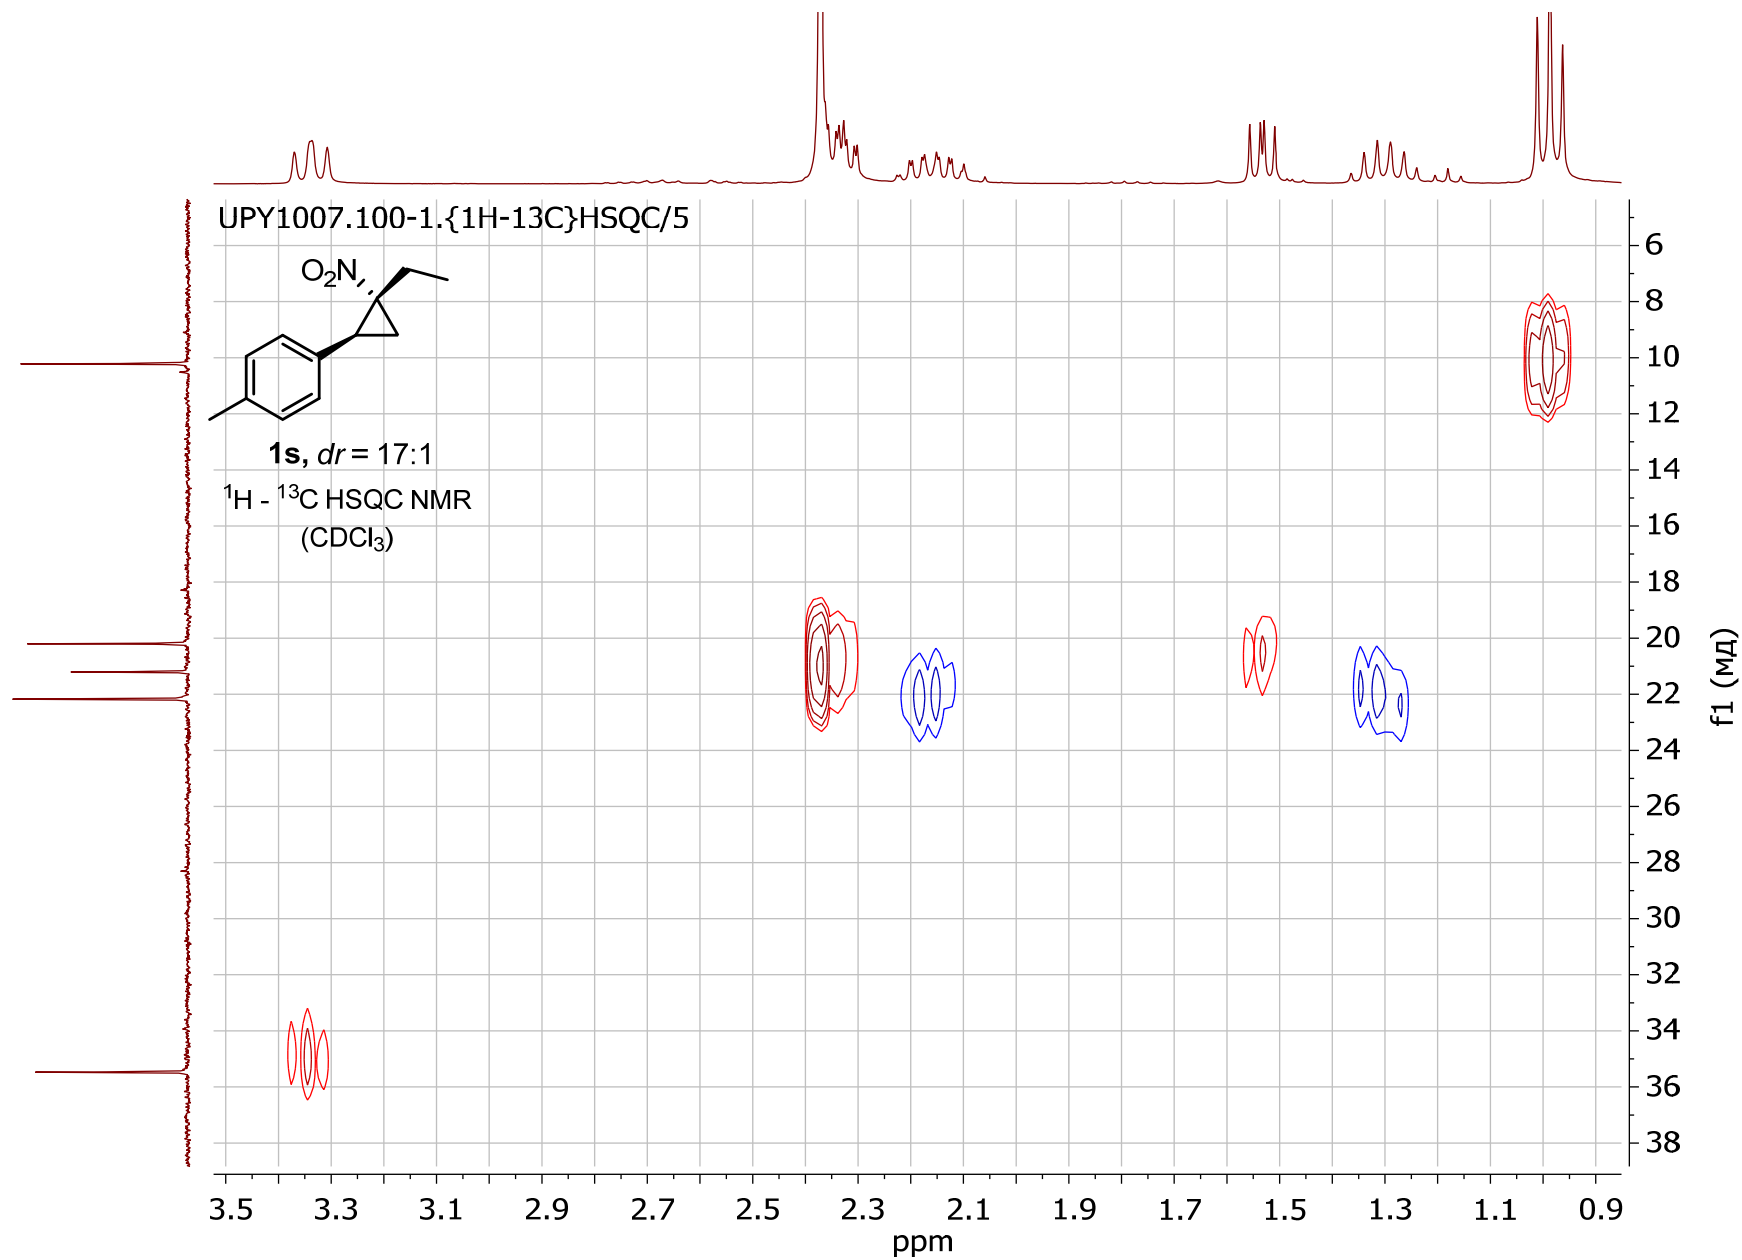

# NMR of 1s

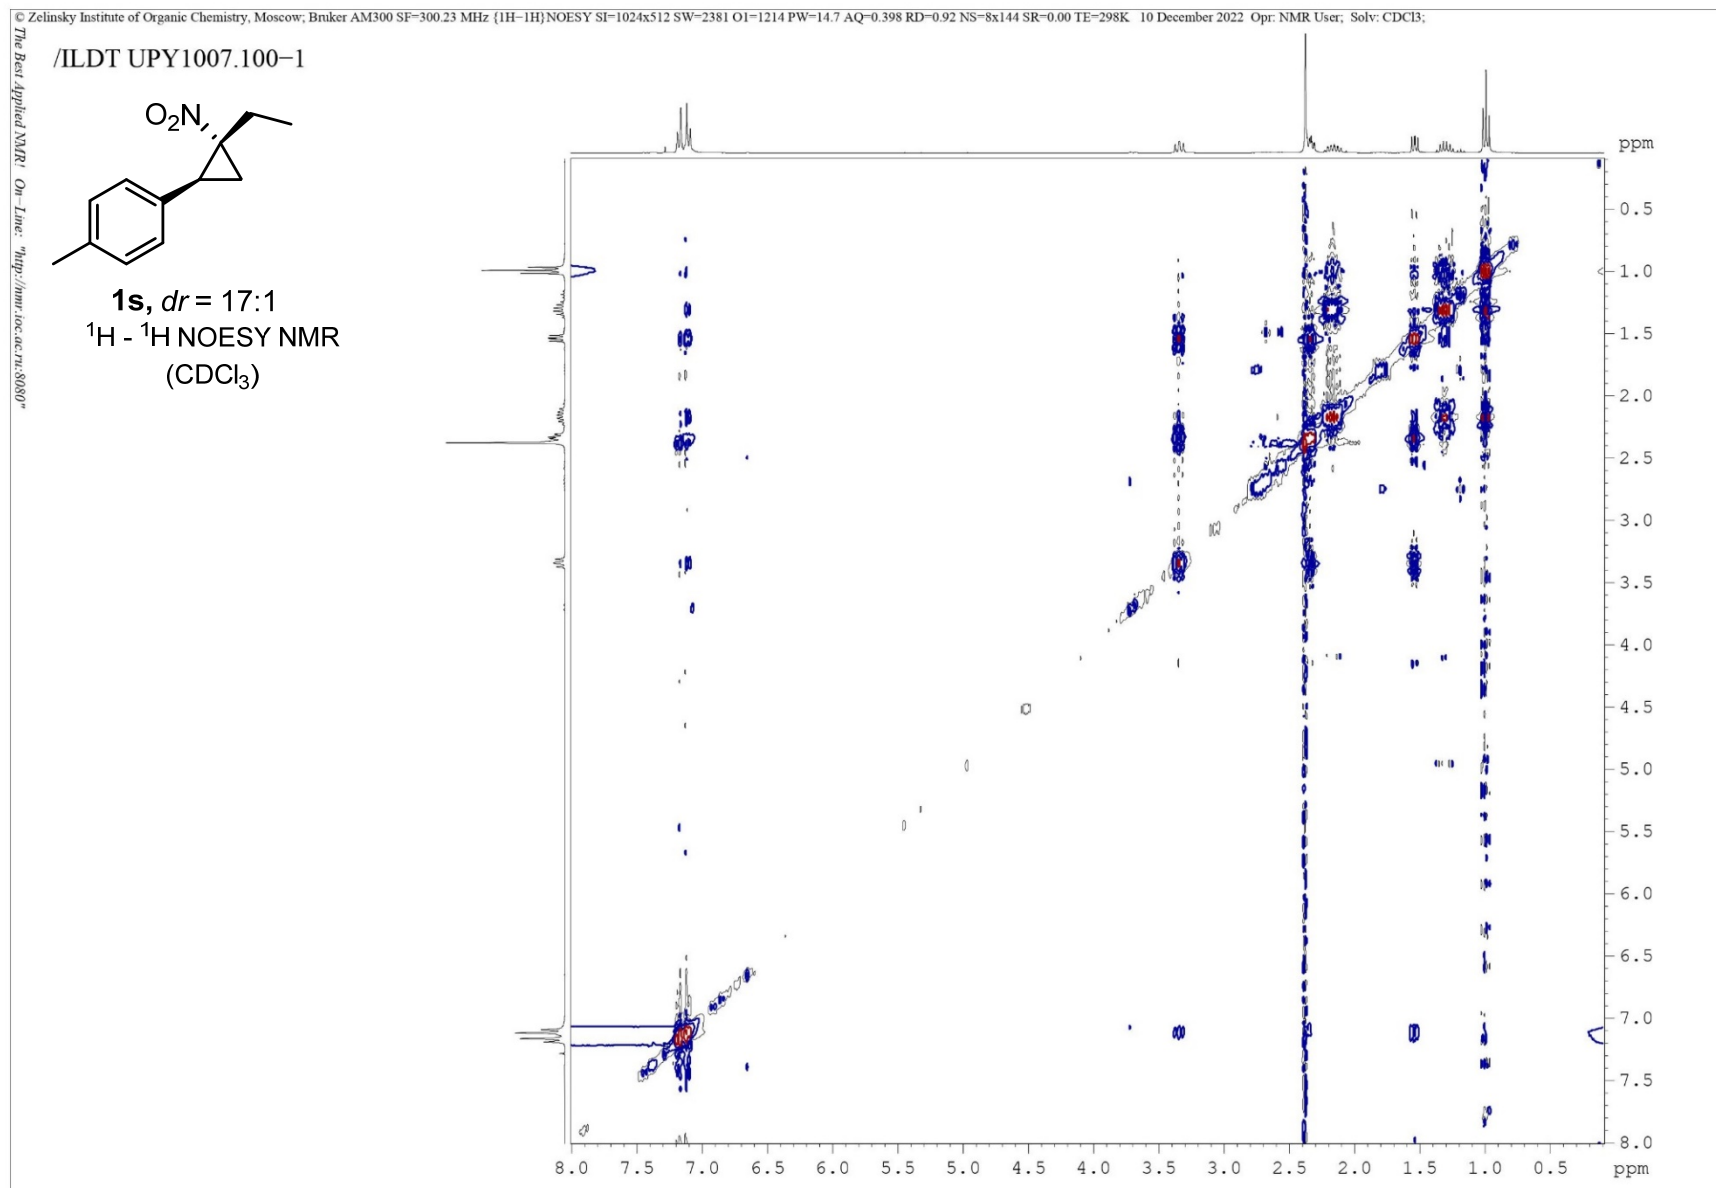

UPY1018.101.{1H}/5

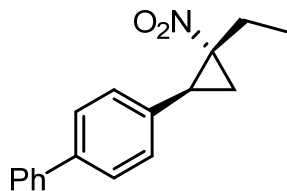

**1t**, *dr* = 6:1

<sup>1</sup>H NMR (300 MHz, CDCl<sub>3</sub>)

7.64  
7.60  
7.49  
7.40  
7.28

### NMR of 1t

3.46  
3.43  
3.42  
3.39  
2.82  
2.72  
2.65  
2.60  
2.43  
2.39  
2.37  
2.27  
2.22  
2.17  
1.90  
1.77  
1.63  
1.61  
1.60  
1.58  
1.42  
1.40  
1.31  
1.24  
1.22  
1.19  
1.06  
1.03  
1.01

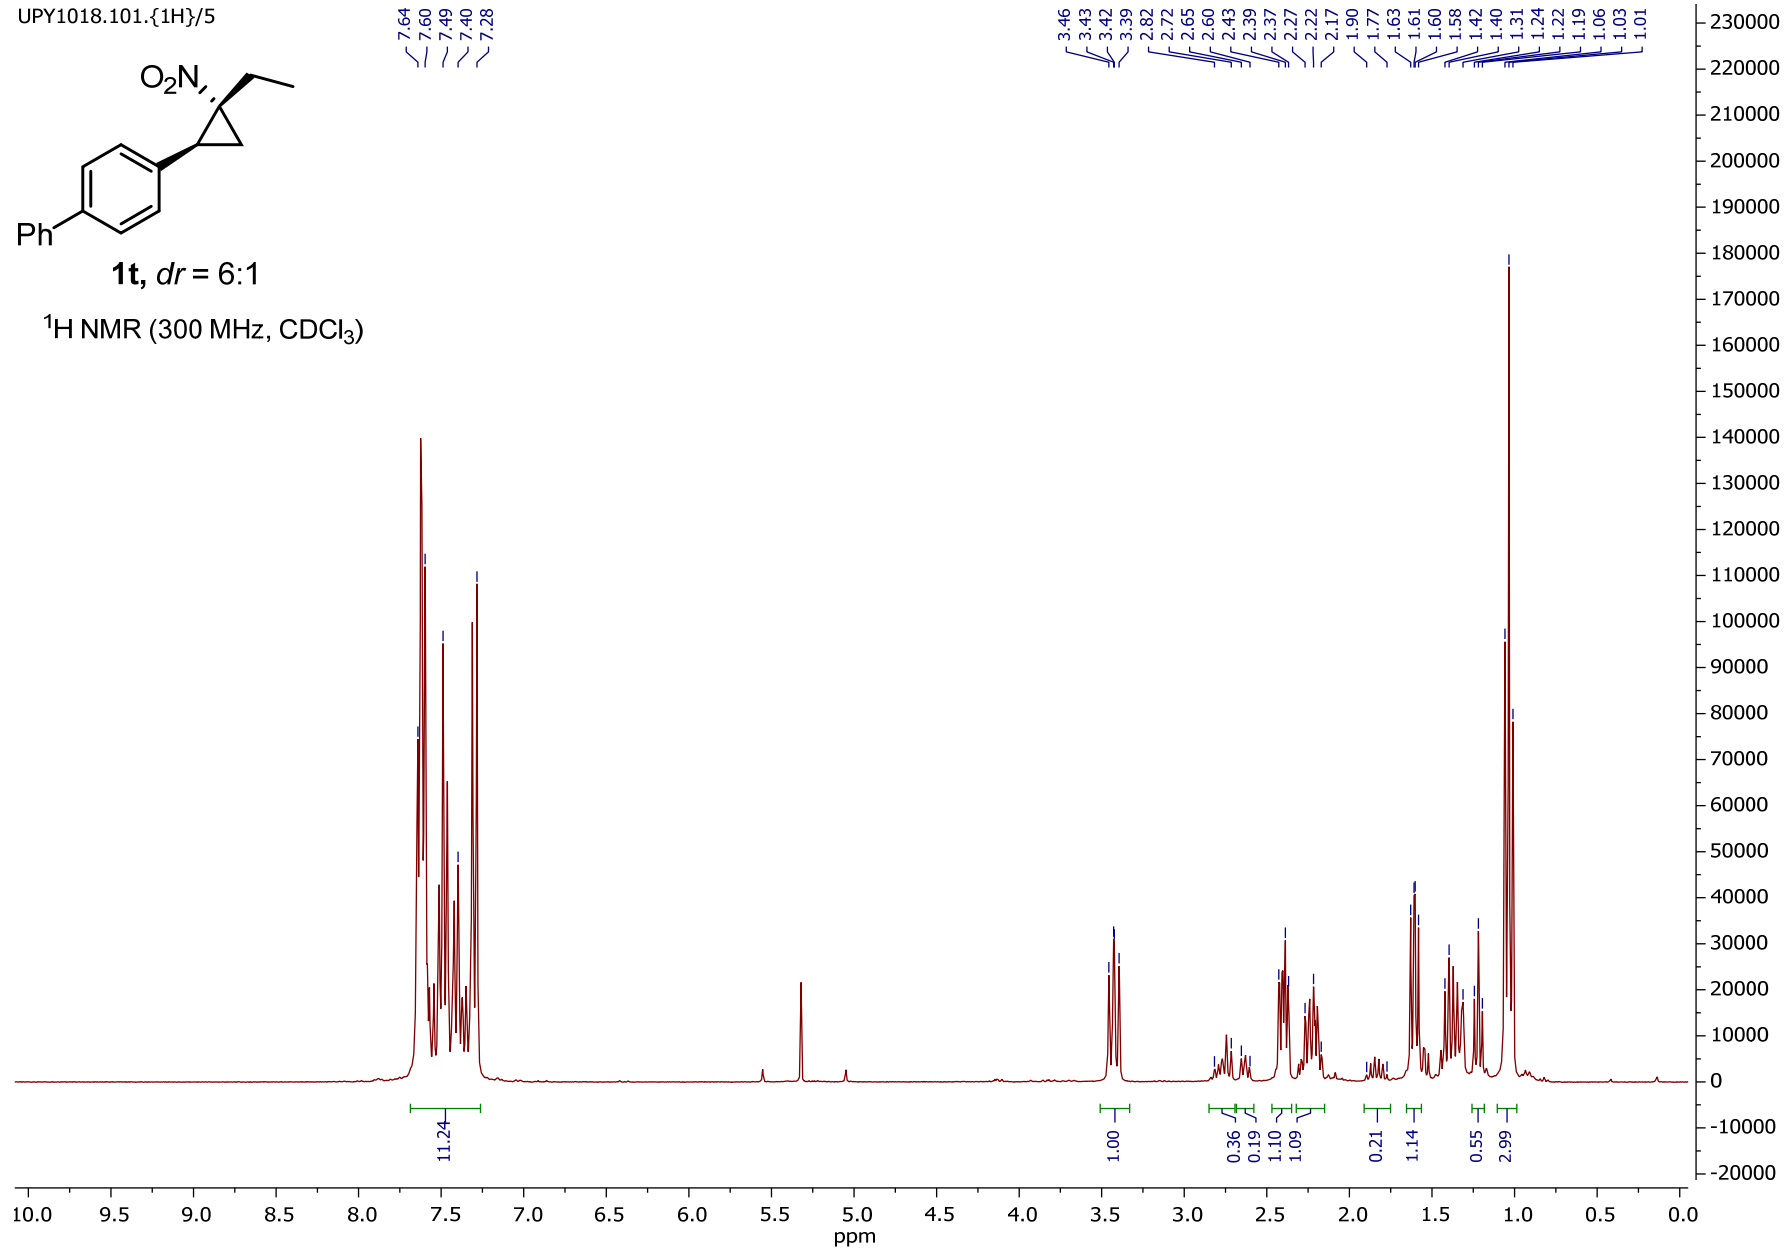

NMR of **1t**

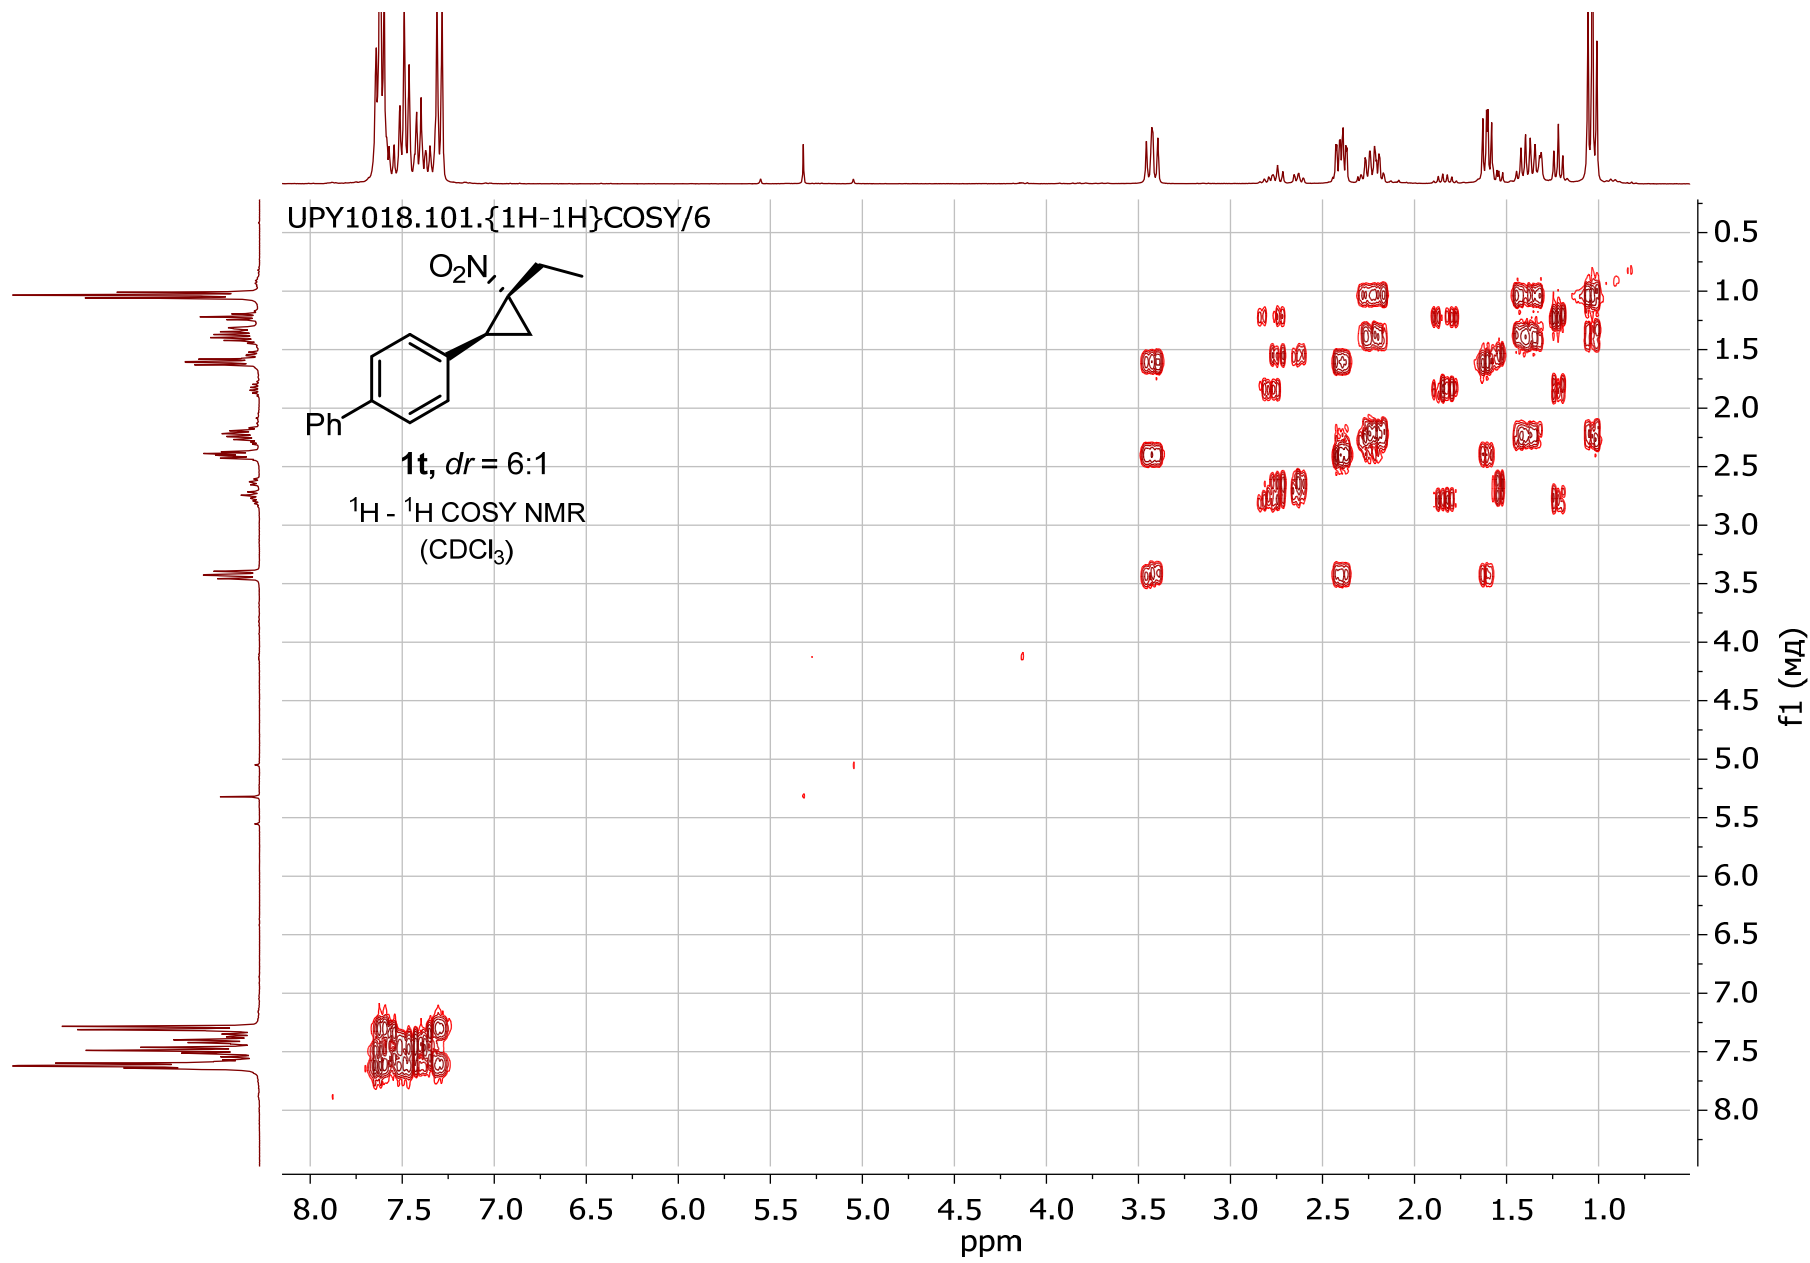

NMR of **1t**

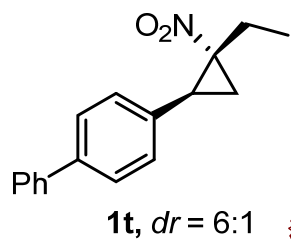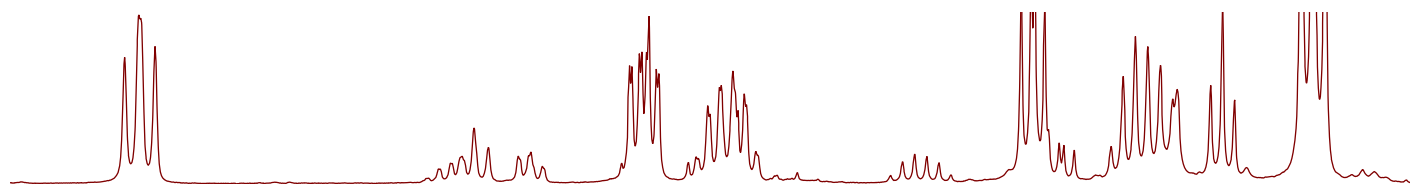

UPY1018.101.{1H-1H}COSY/6

<sup>1</sup>H - <sup>1</sup>H COSY NMR  
(CDCl<sub>3</sub>)

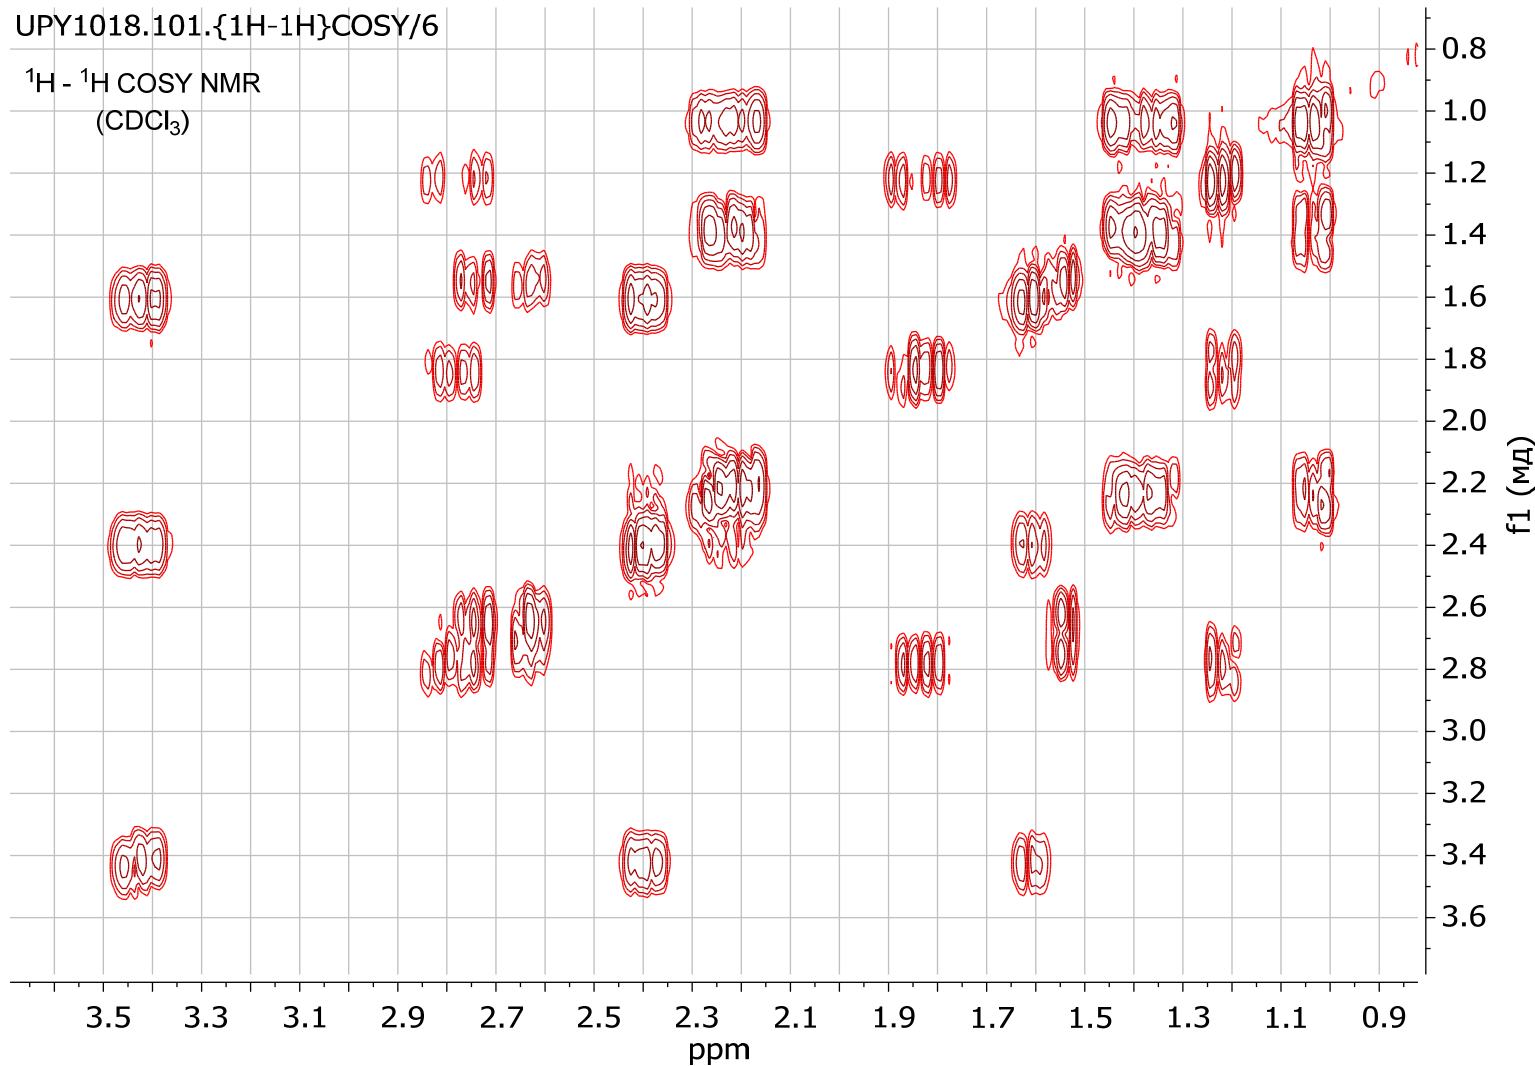

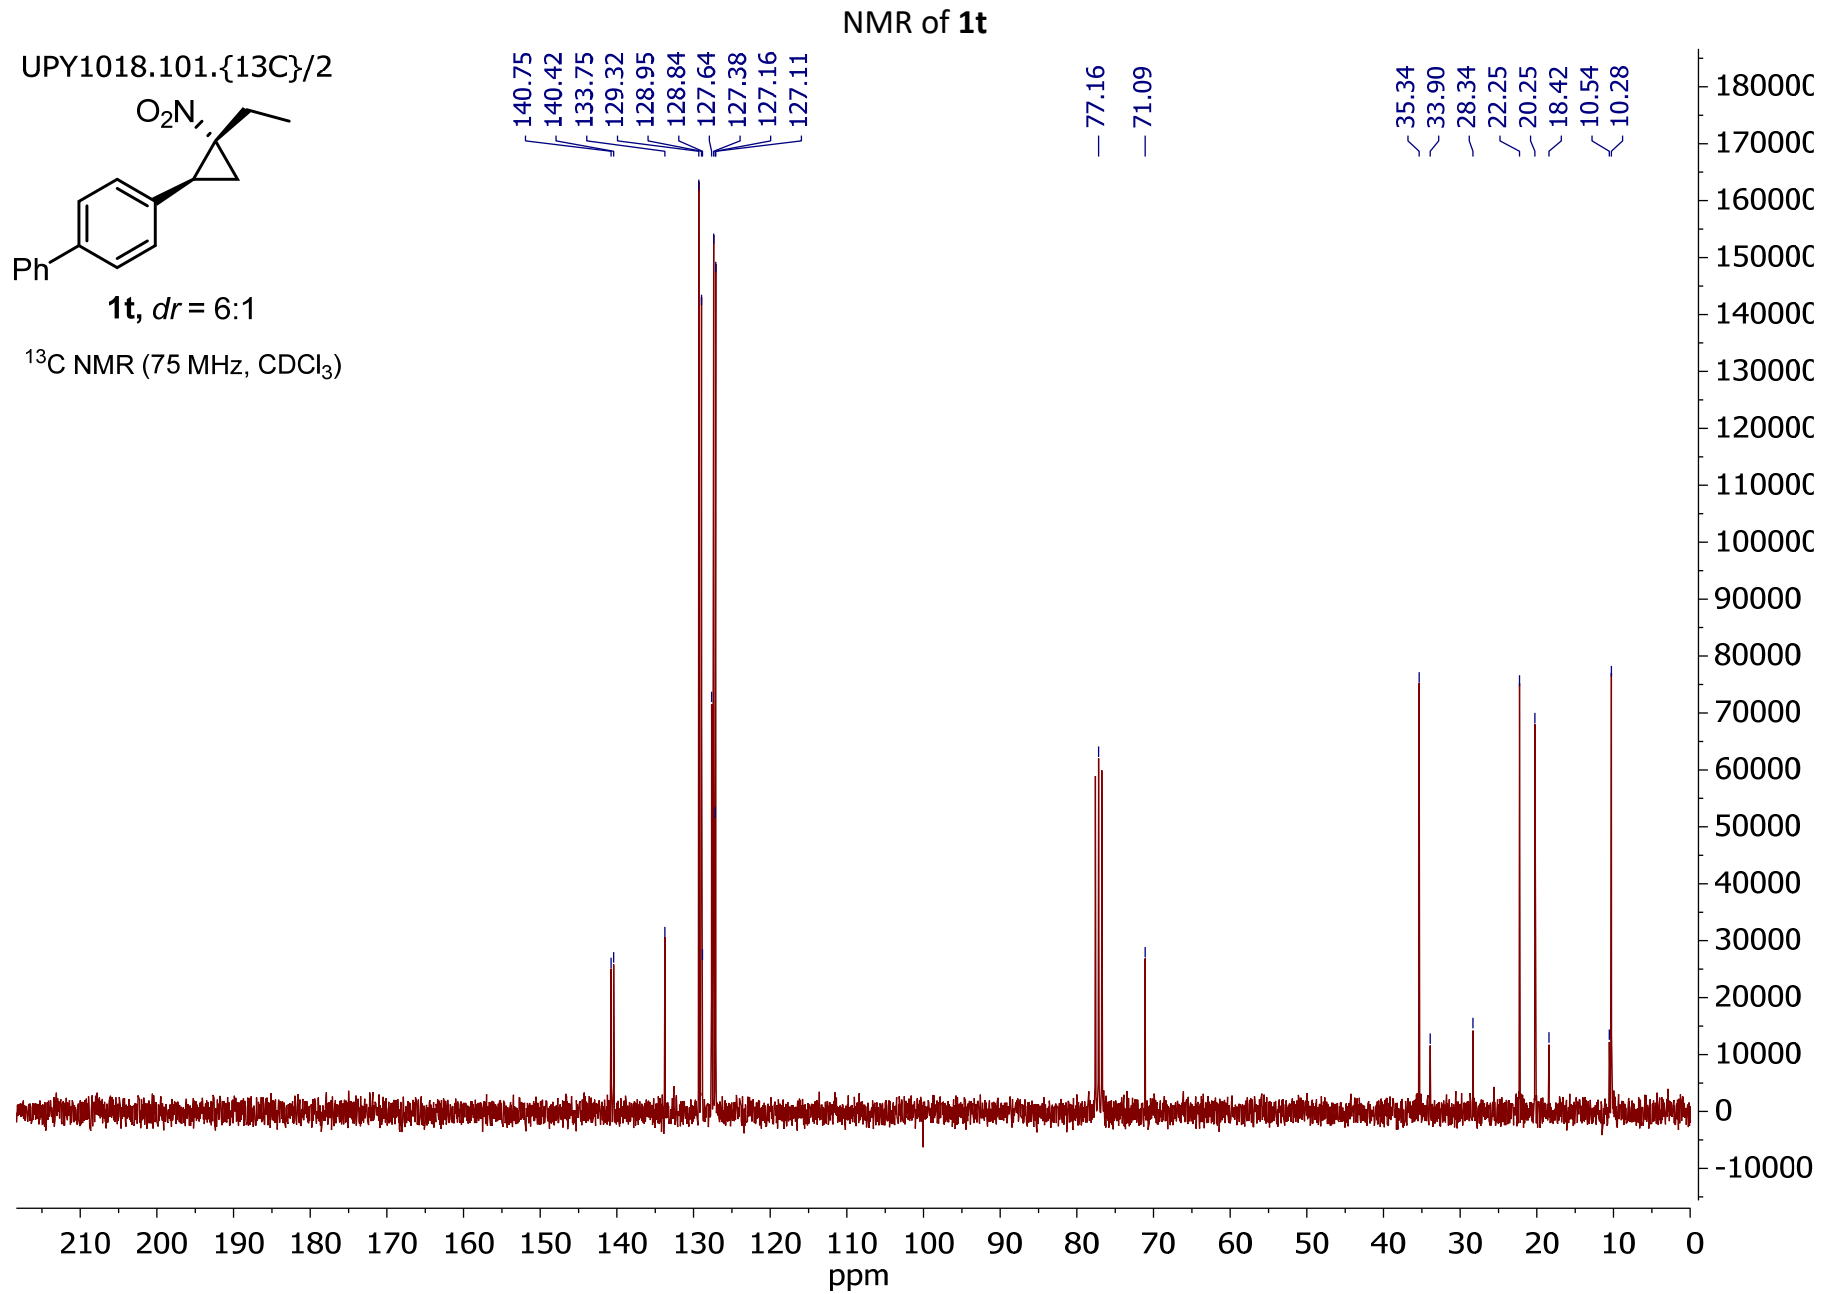



NMR of **1t**

UPY1018.101.{<sup>13</sup>C}depts135/3

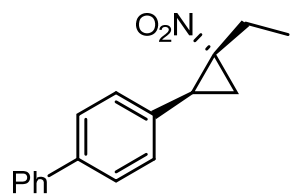

**1t**, *dr* = 6:1

<sup>13</sup>C DEPT NMR  
(75 MHz, CDCl<sub>3</sub>)

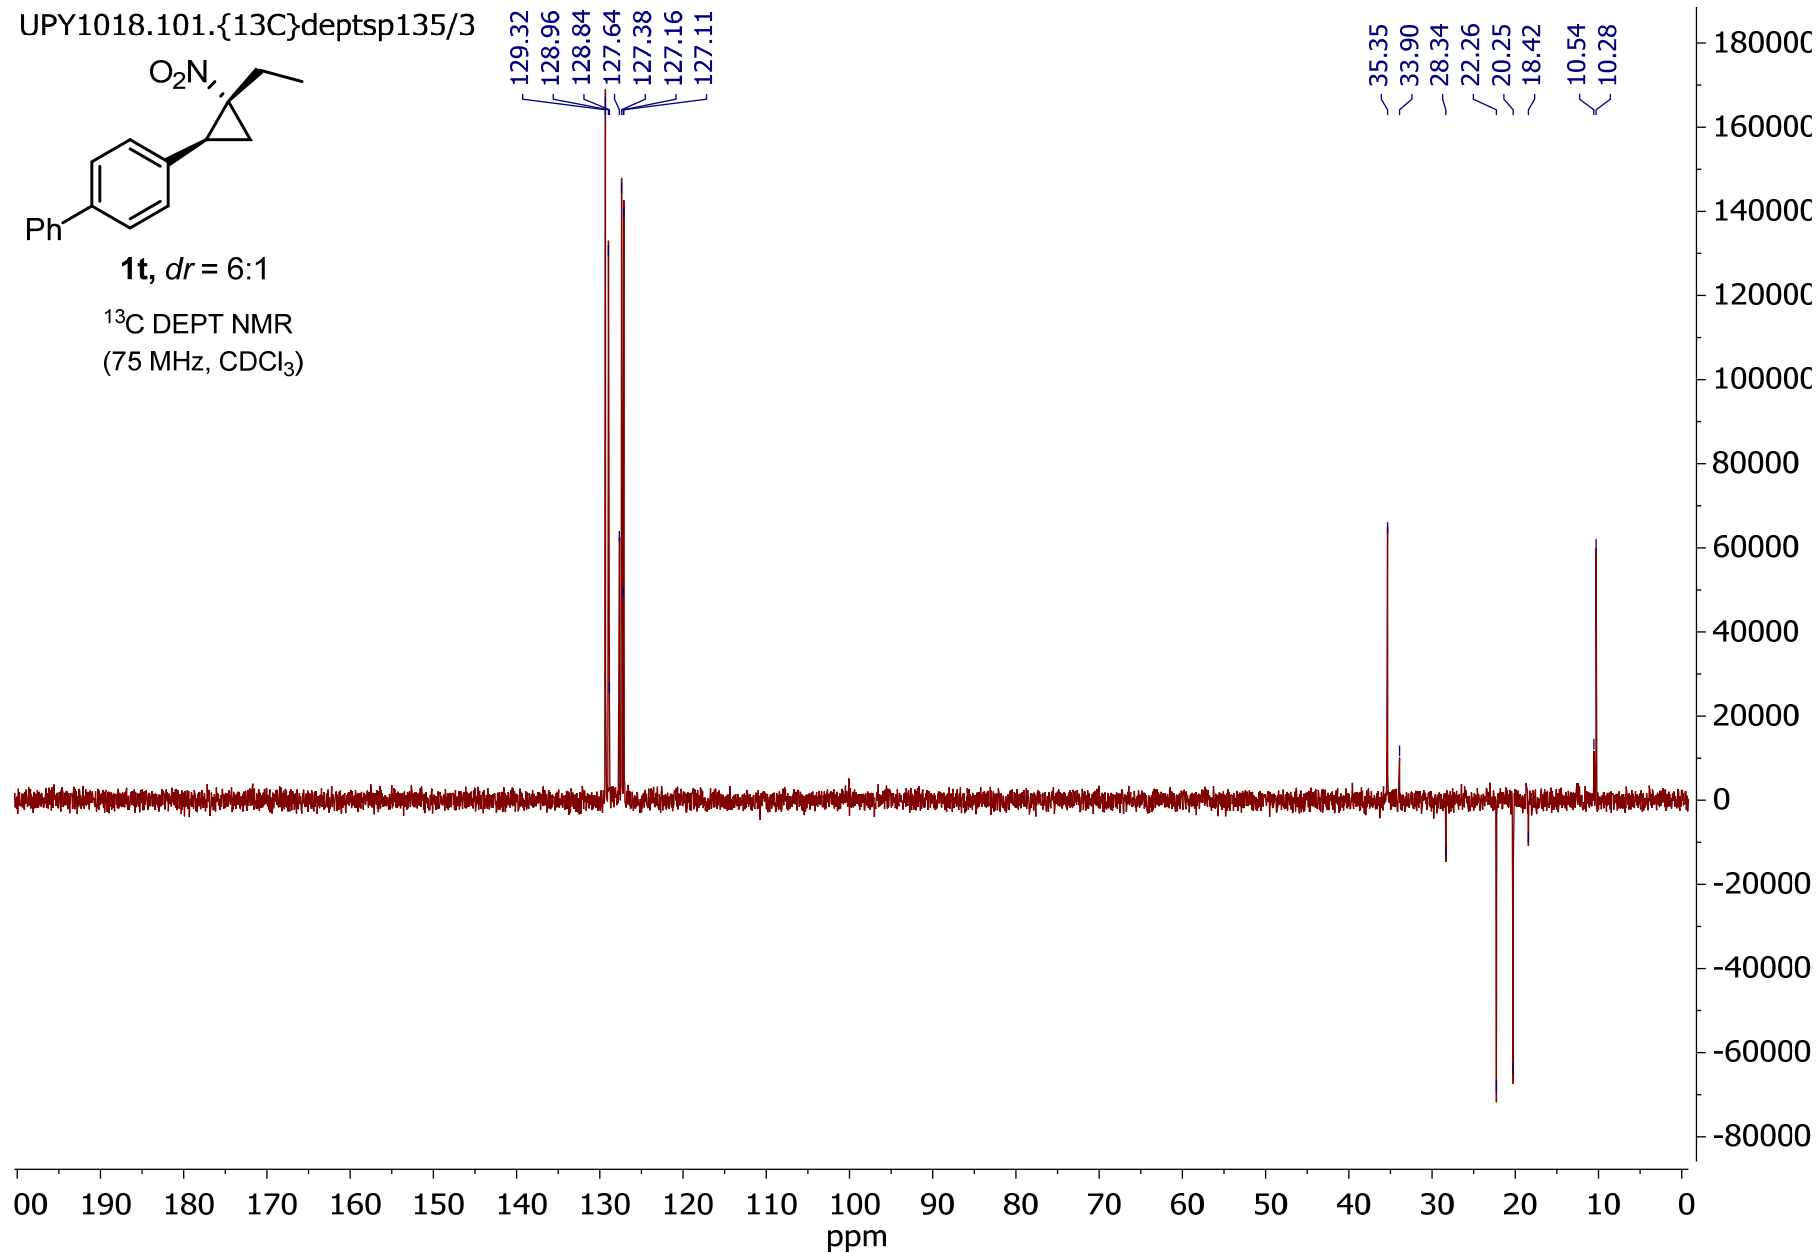

NMR of **1t**

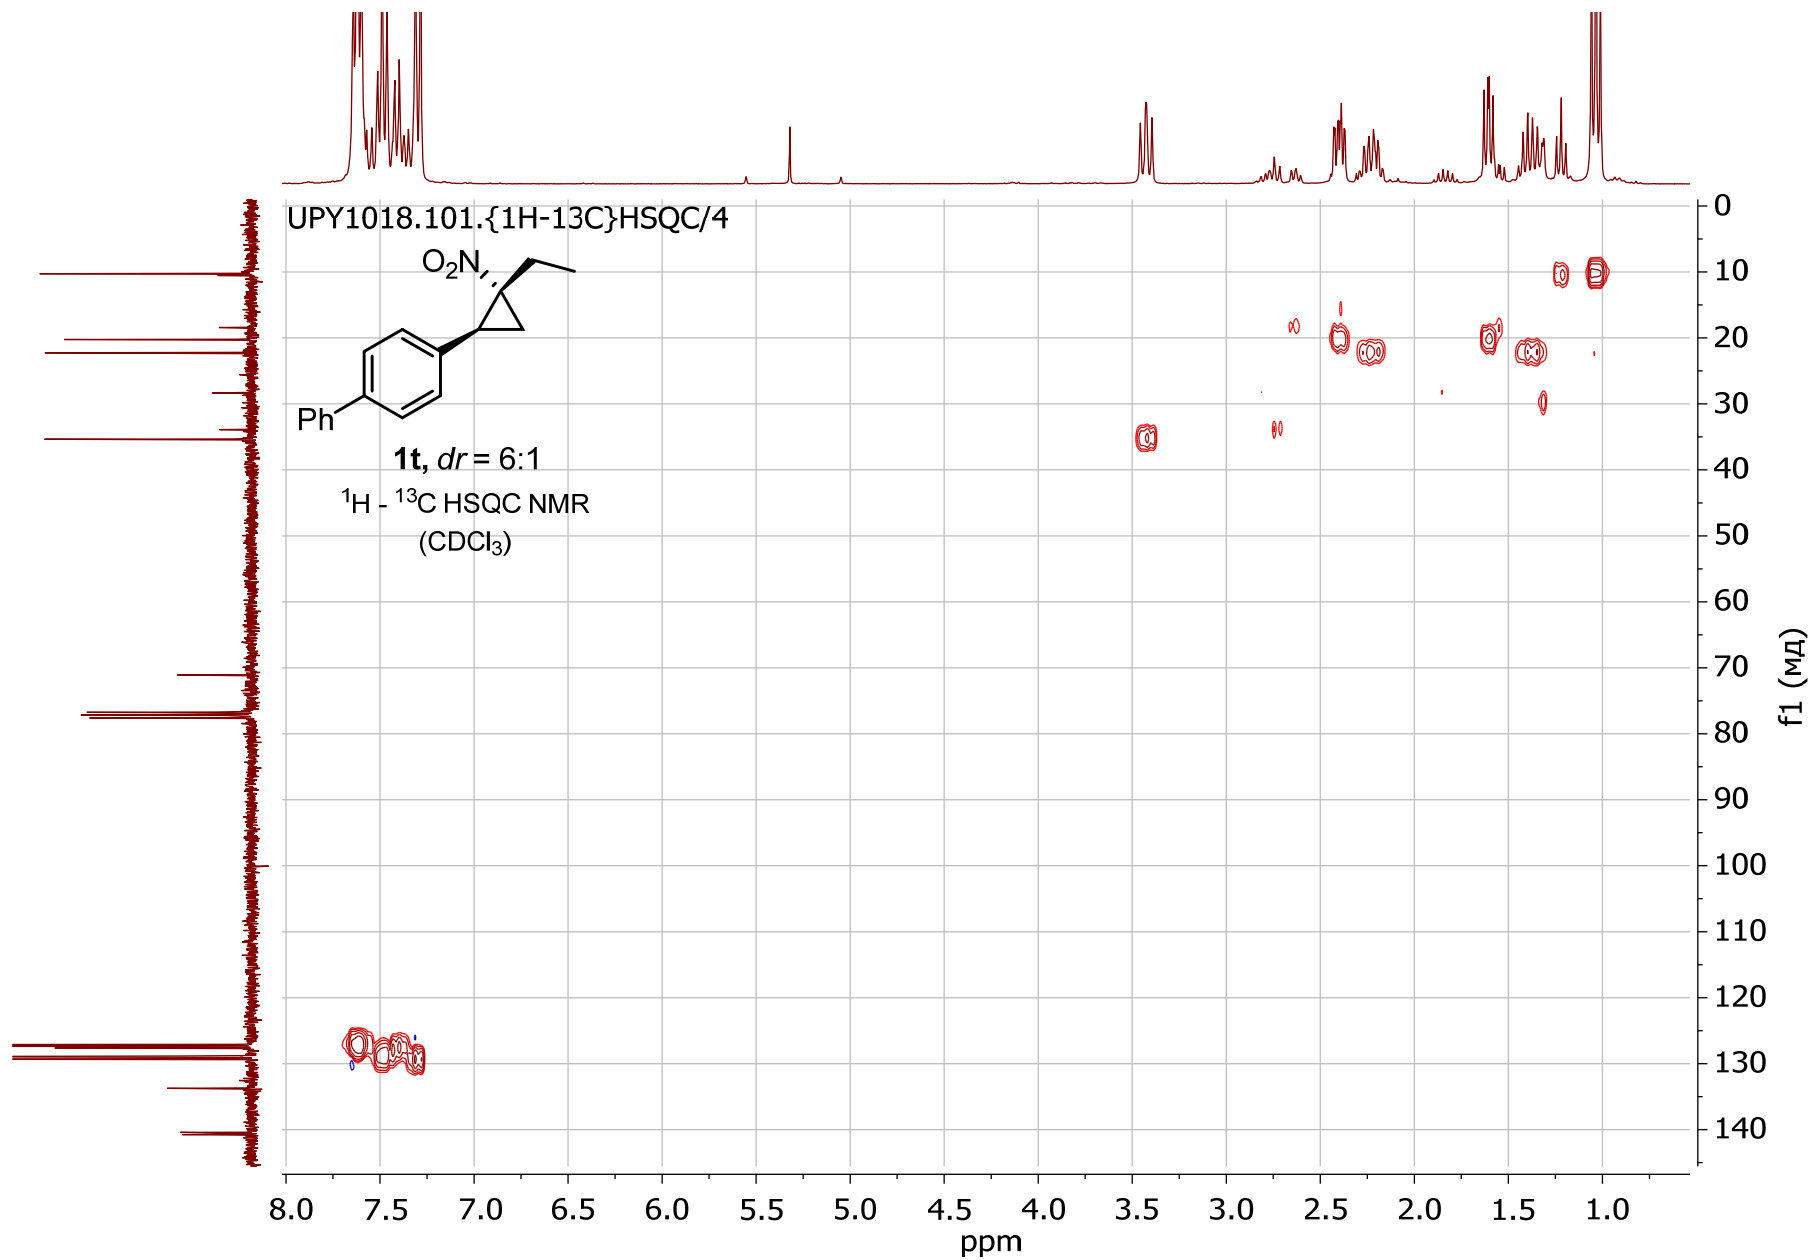

NMR of **1t**

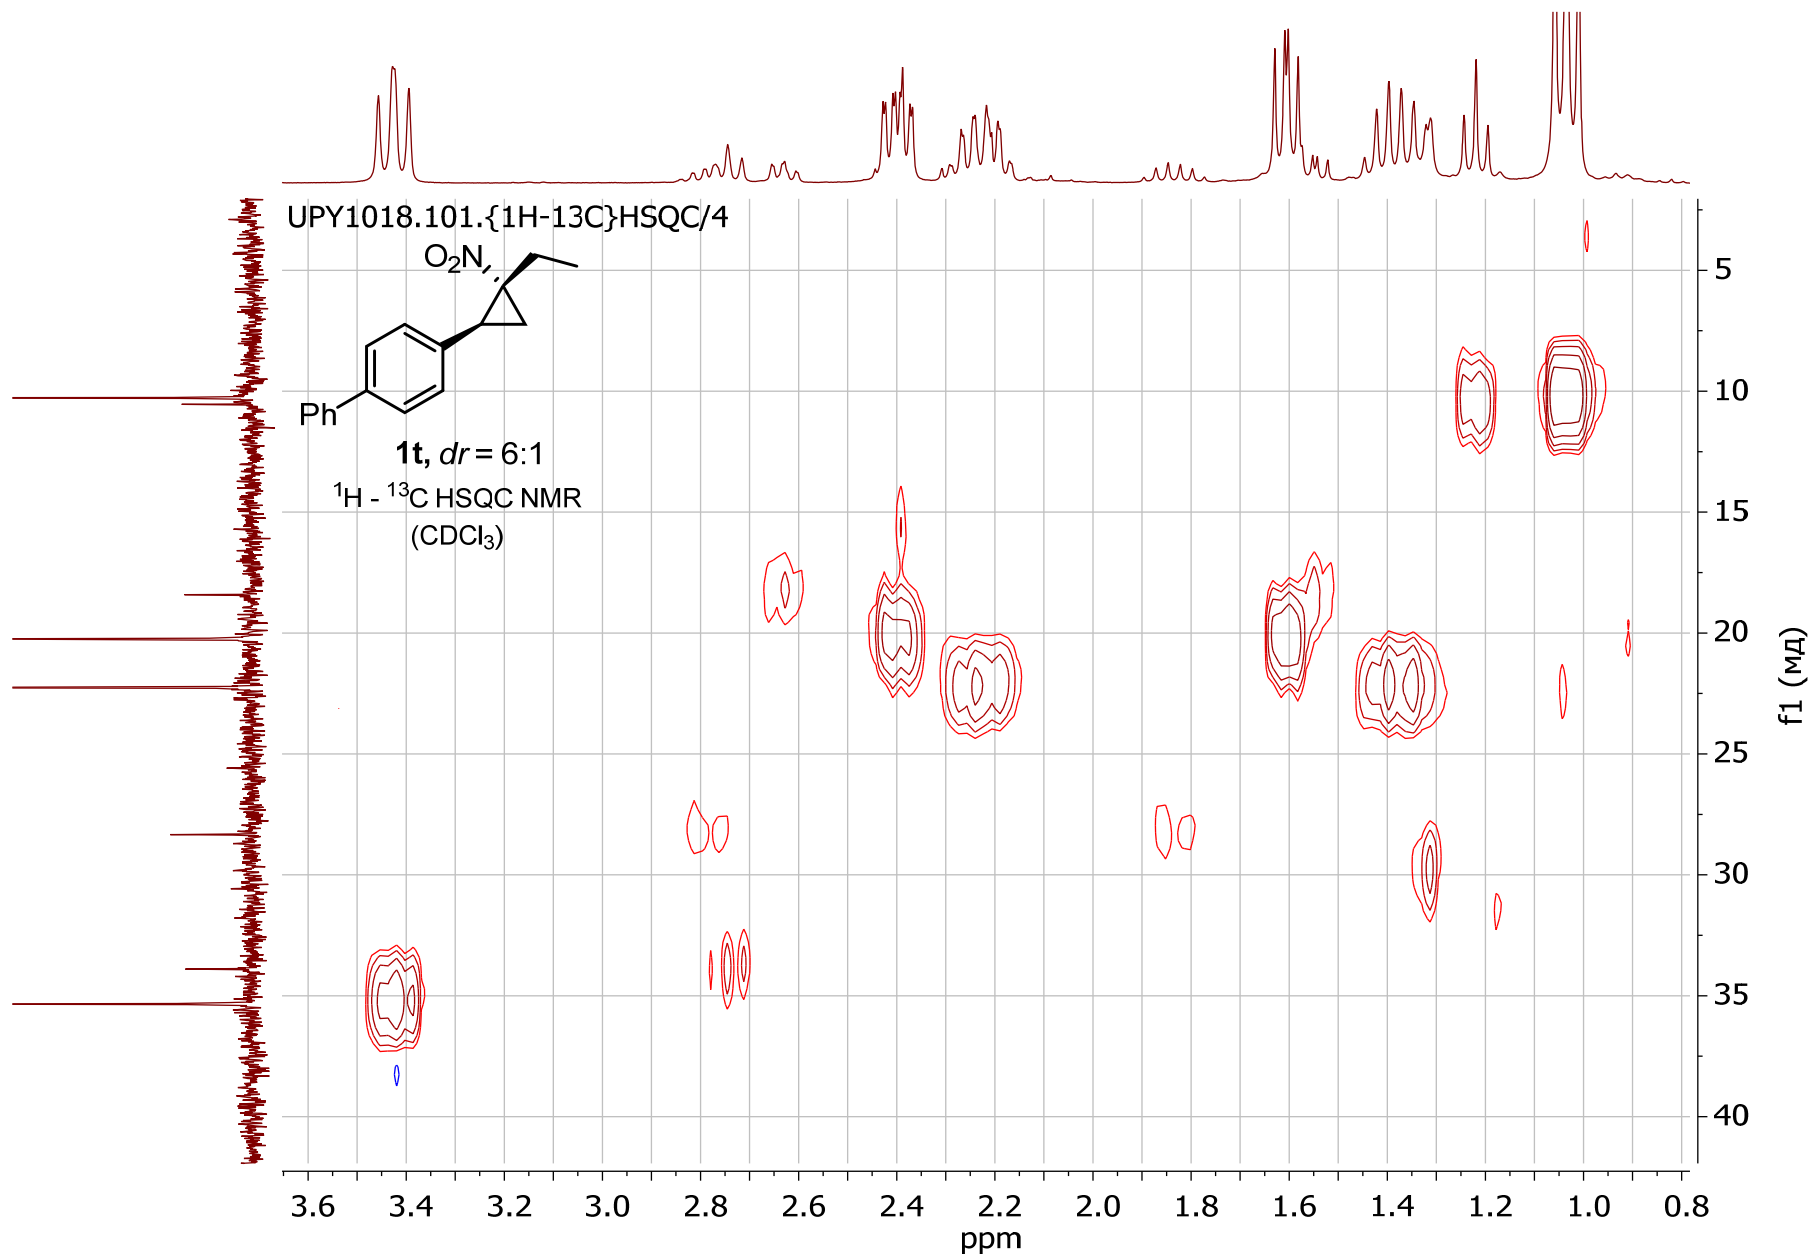

NMR of **1u**

UPY1008.101.{1H}/1  
/ILDT UPY1008.101

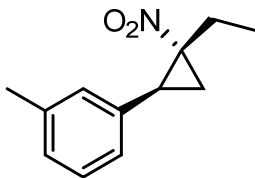

**1u**, *dr* = 6:1

<sup>1</sup>H NMR (300 MHz, CDCl<sub>3</sub>)

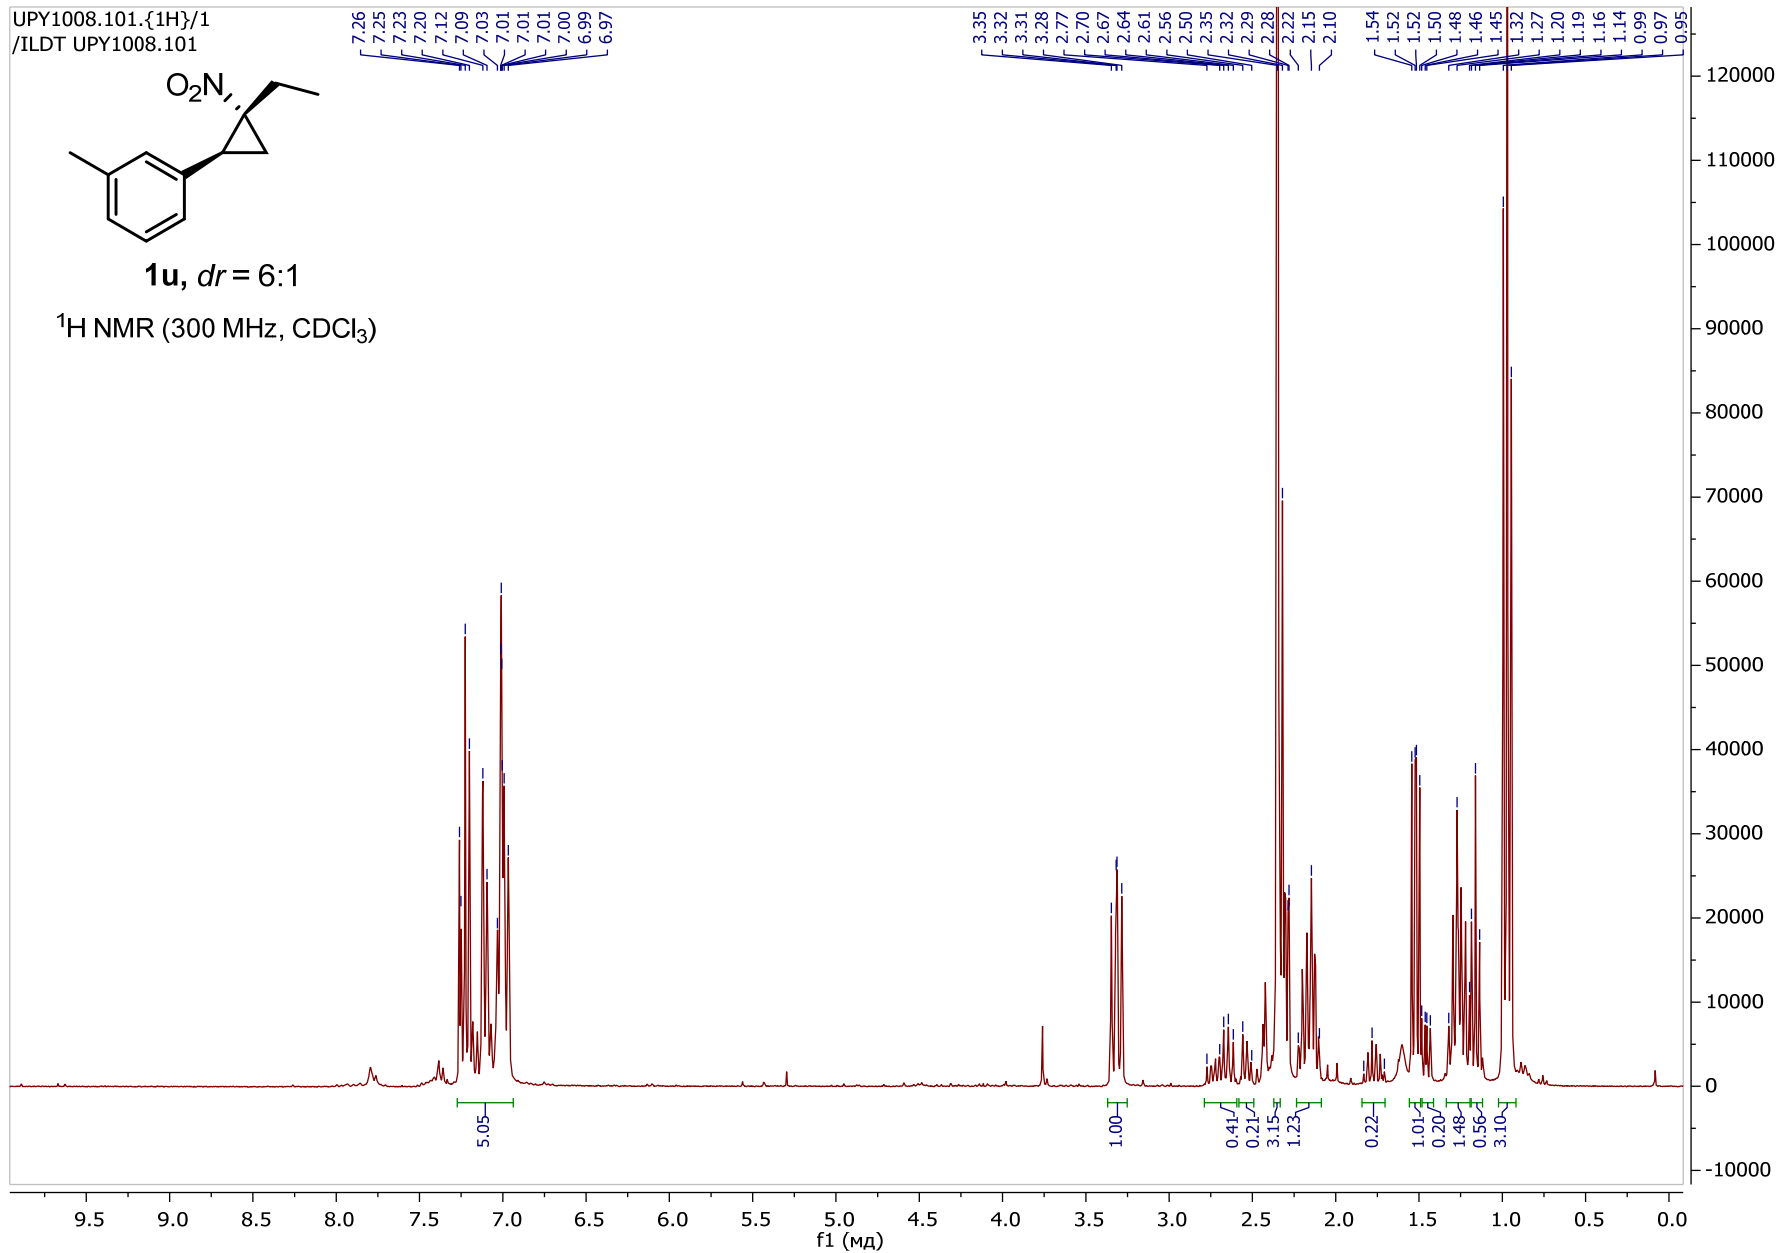

NMR of **1u**

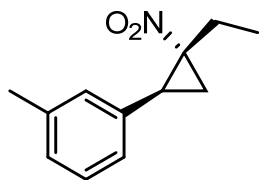

**1u**, *dr* = 6:1

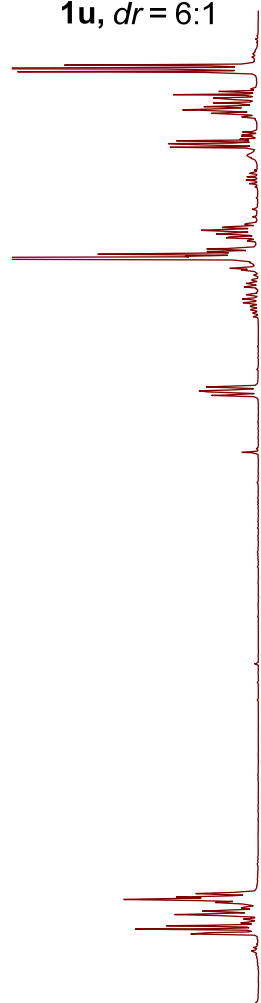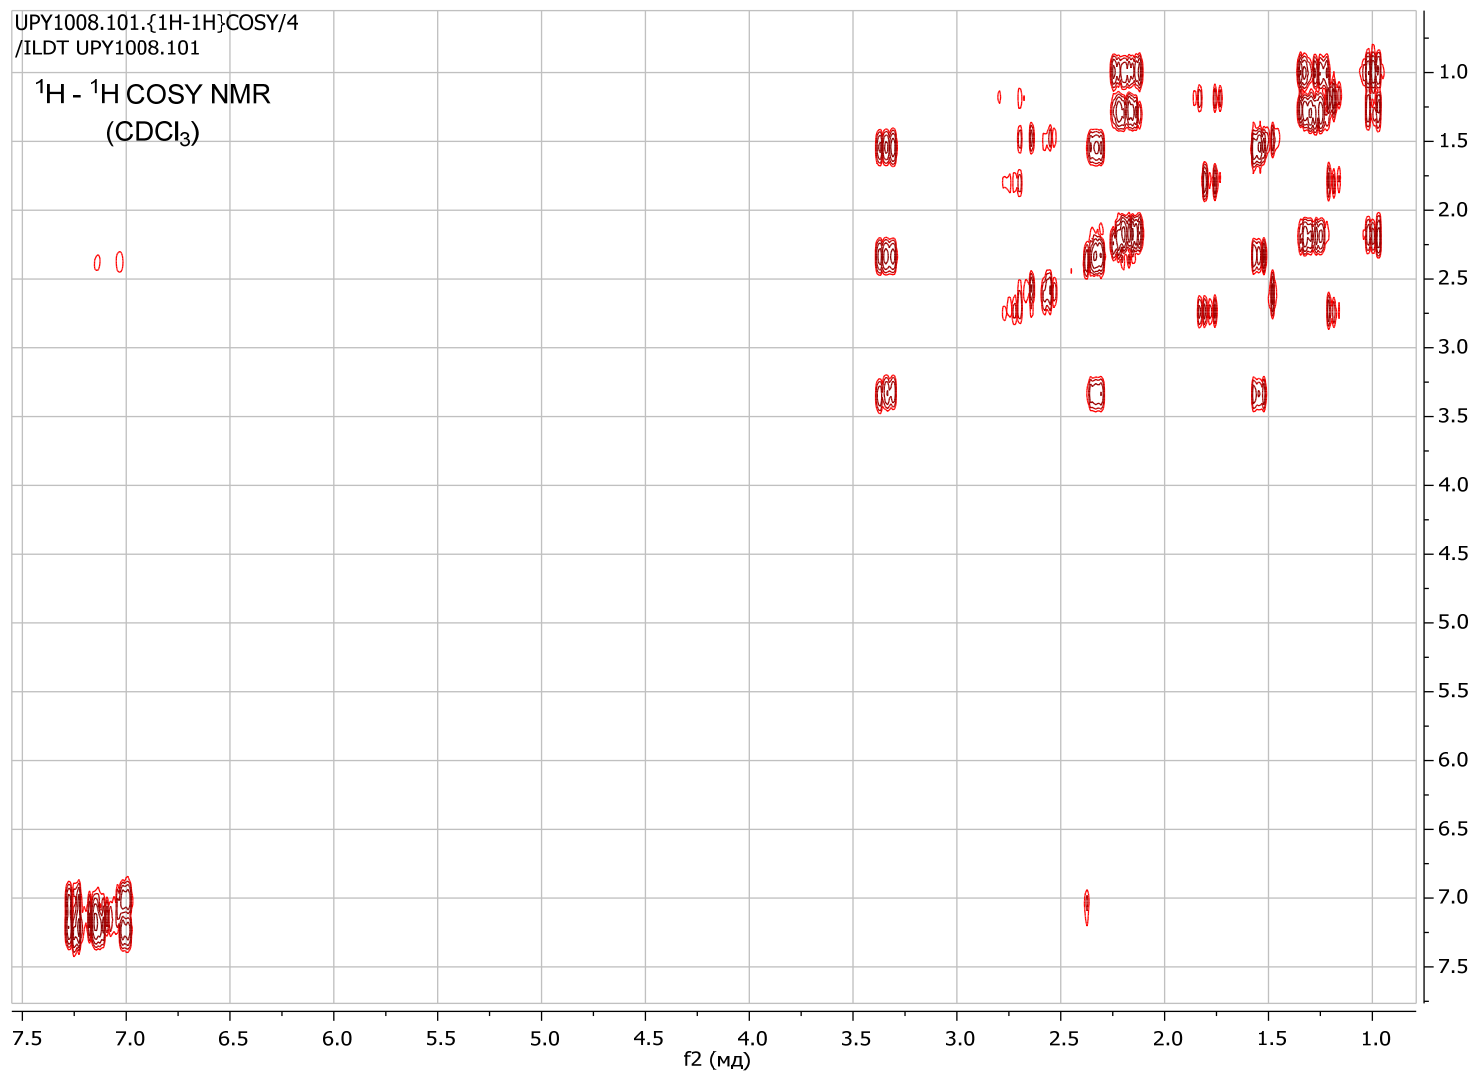

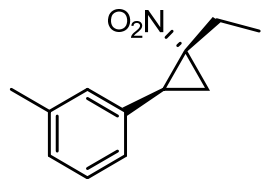

**1u**, *dr* = 6:1

### NMR of **1u**

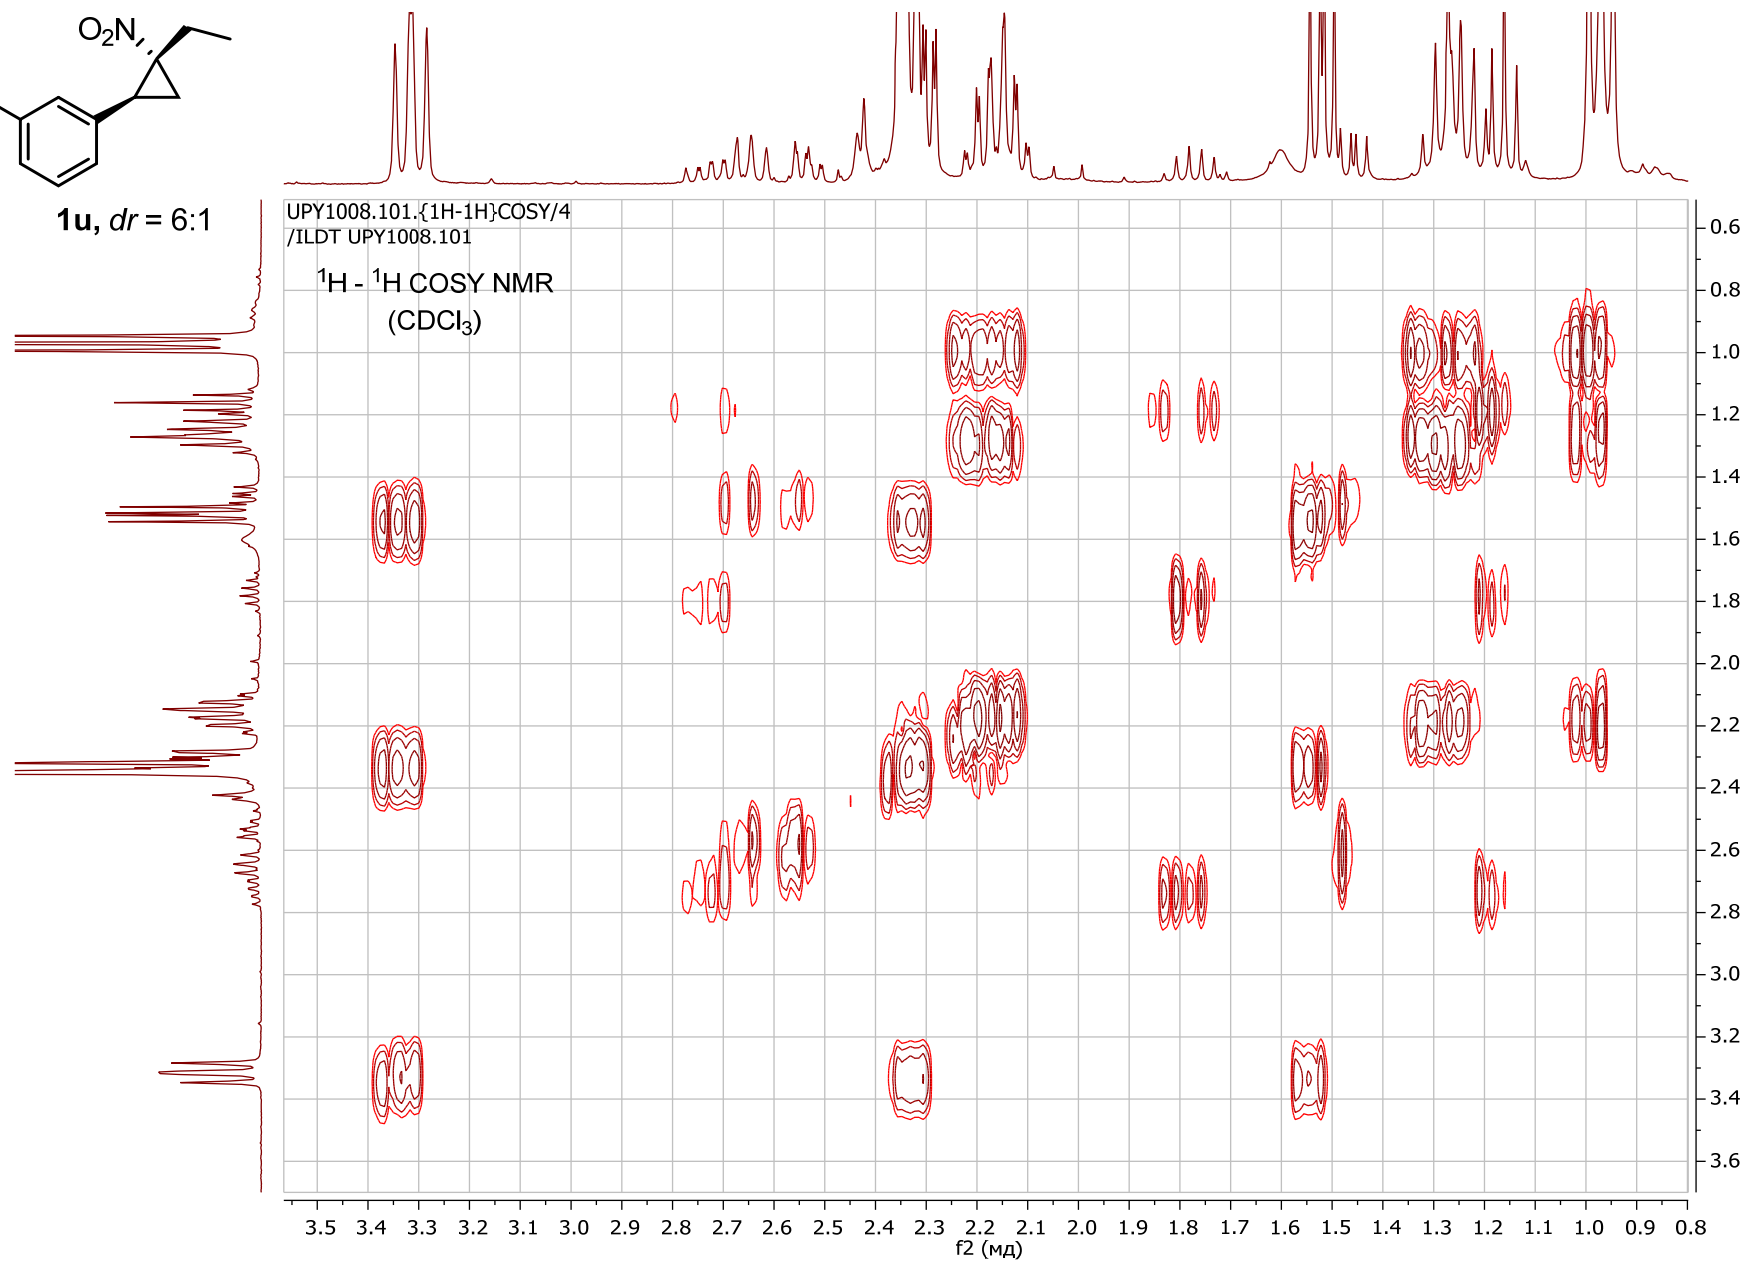

# NMR of **1u**

UPY1008.101.{13C}/2  
/ILD T UPY1008.101

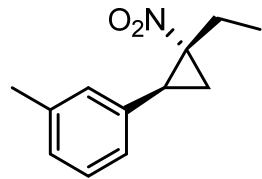

**1u**, *dr* = 6:1

<sup>13</sup>C NMR (75 MHz, CDCl<sub>3</sub>)

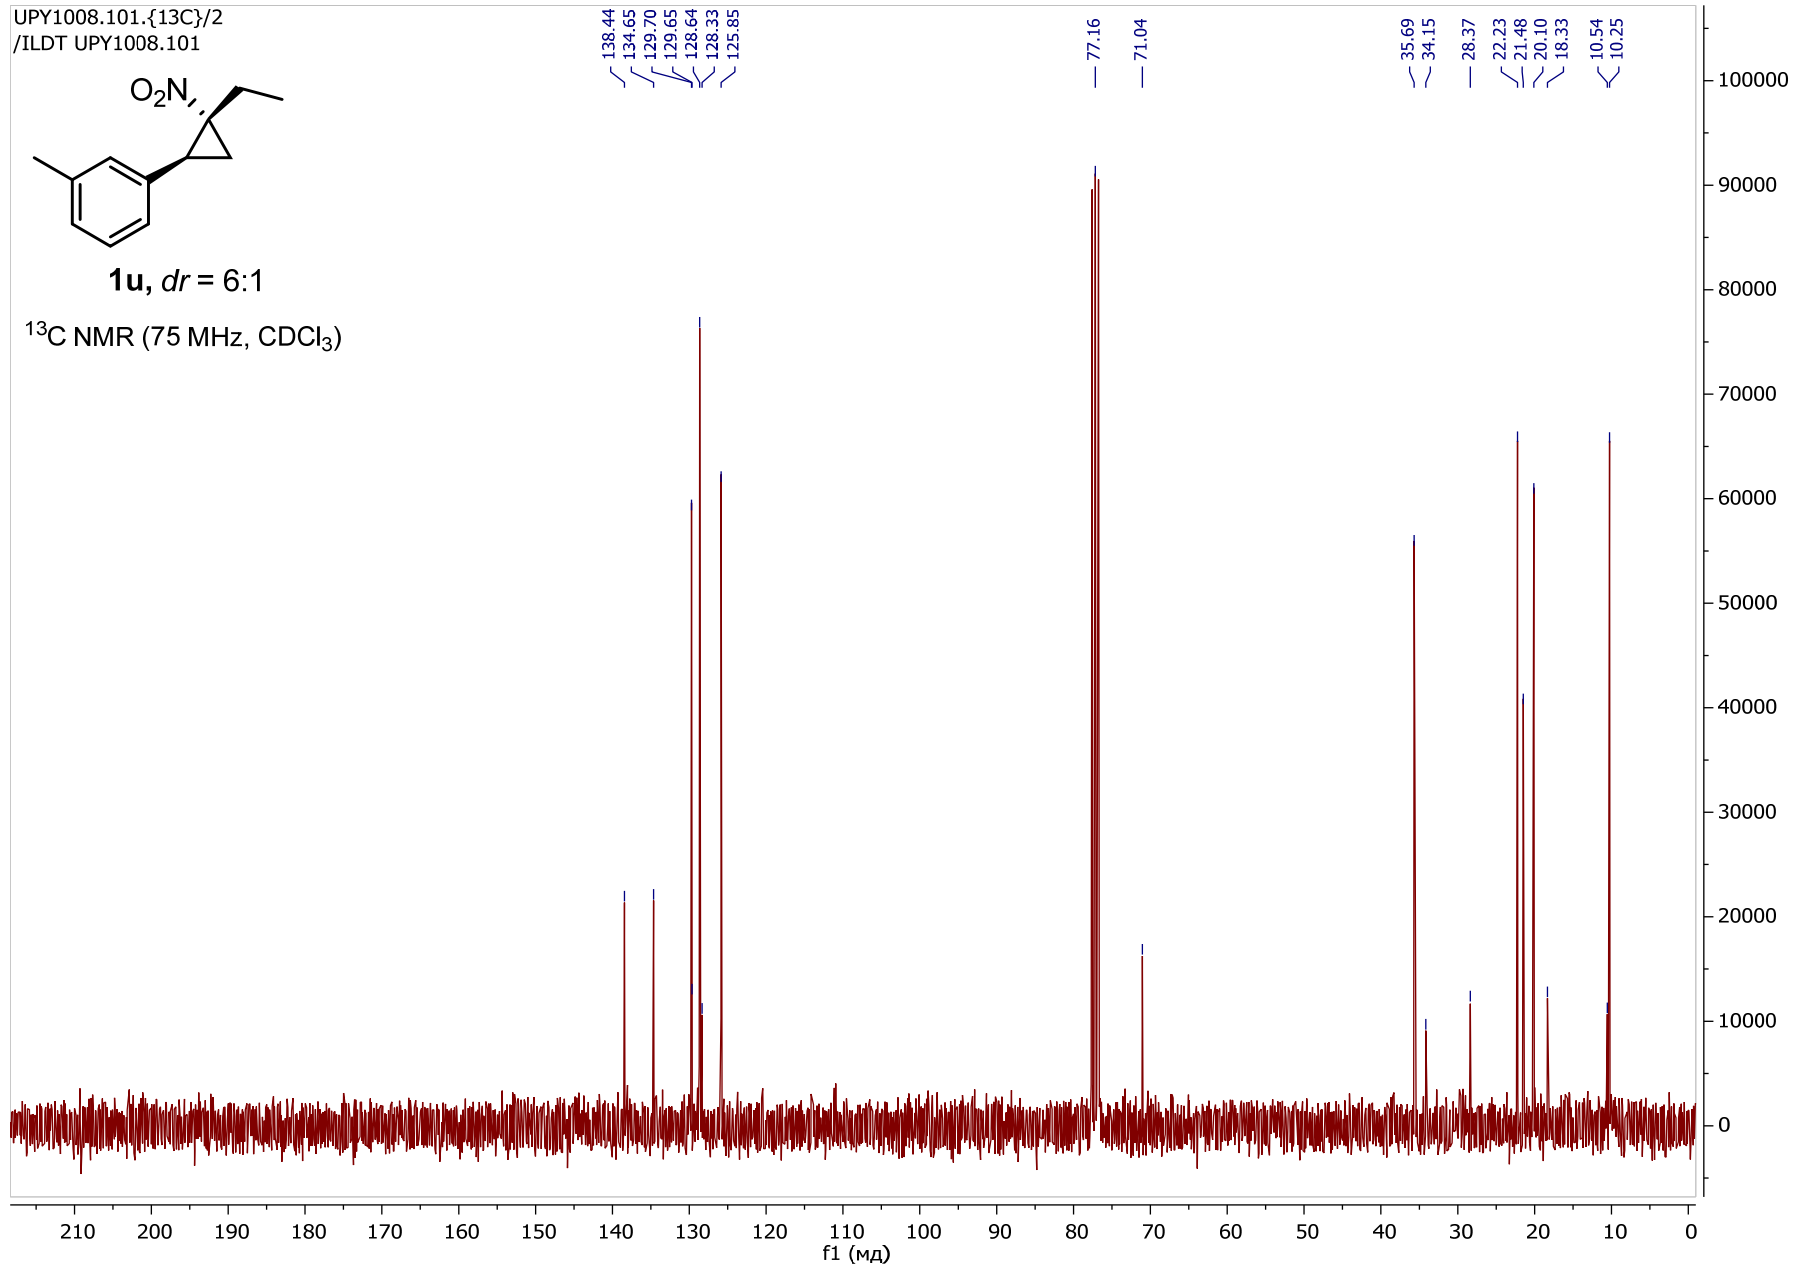

# NMR of **1u**

UPY1008.101.{<sup>13</sup>C}depts135/3  
/ILDY UPY1008.101

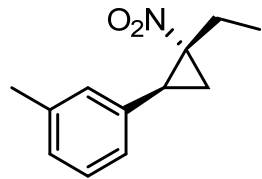

**1u**, *dr* = 6:1

<sup>13</sup>C DEPT NMR  
(75 MHz, CDCl<sub>3</sub>)

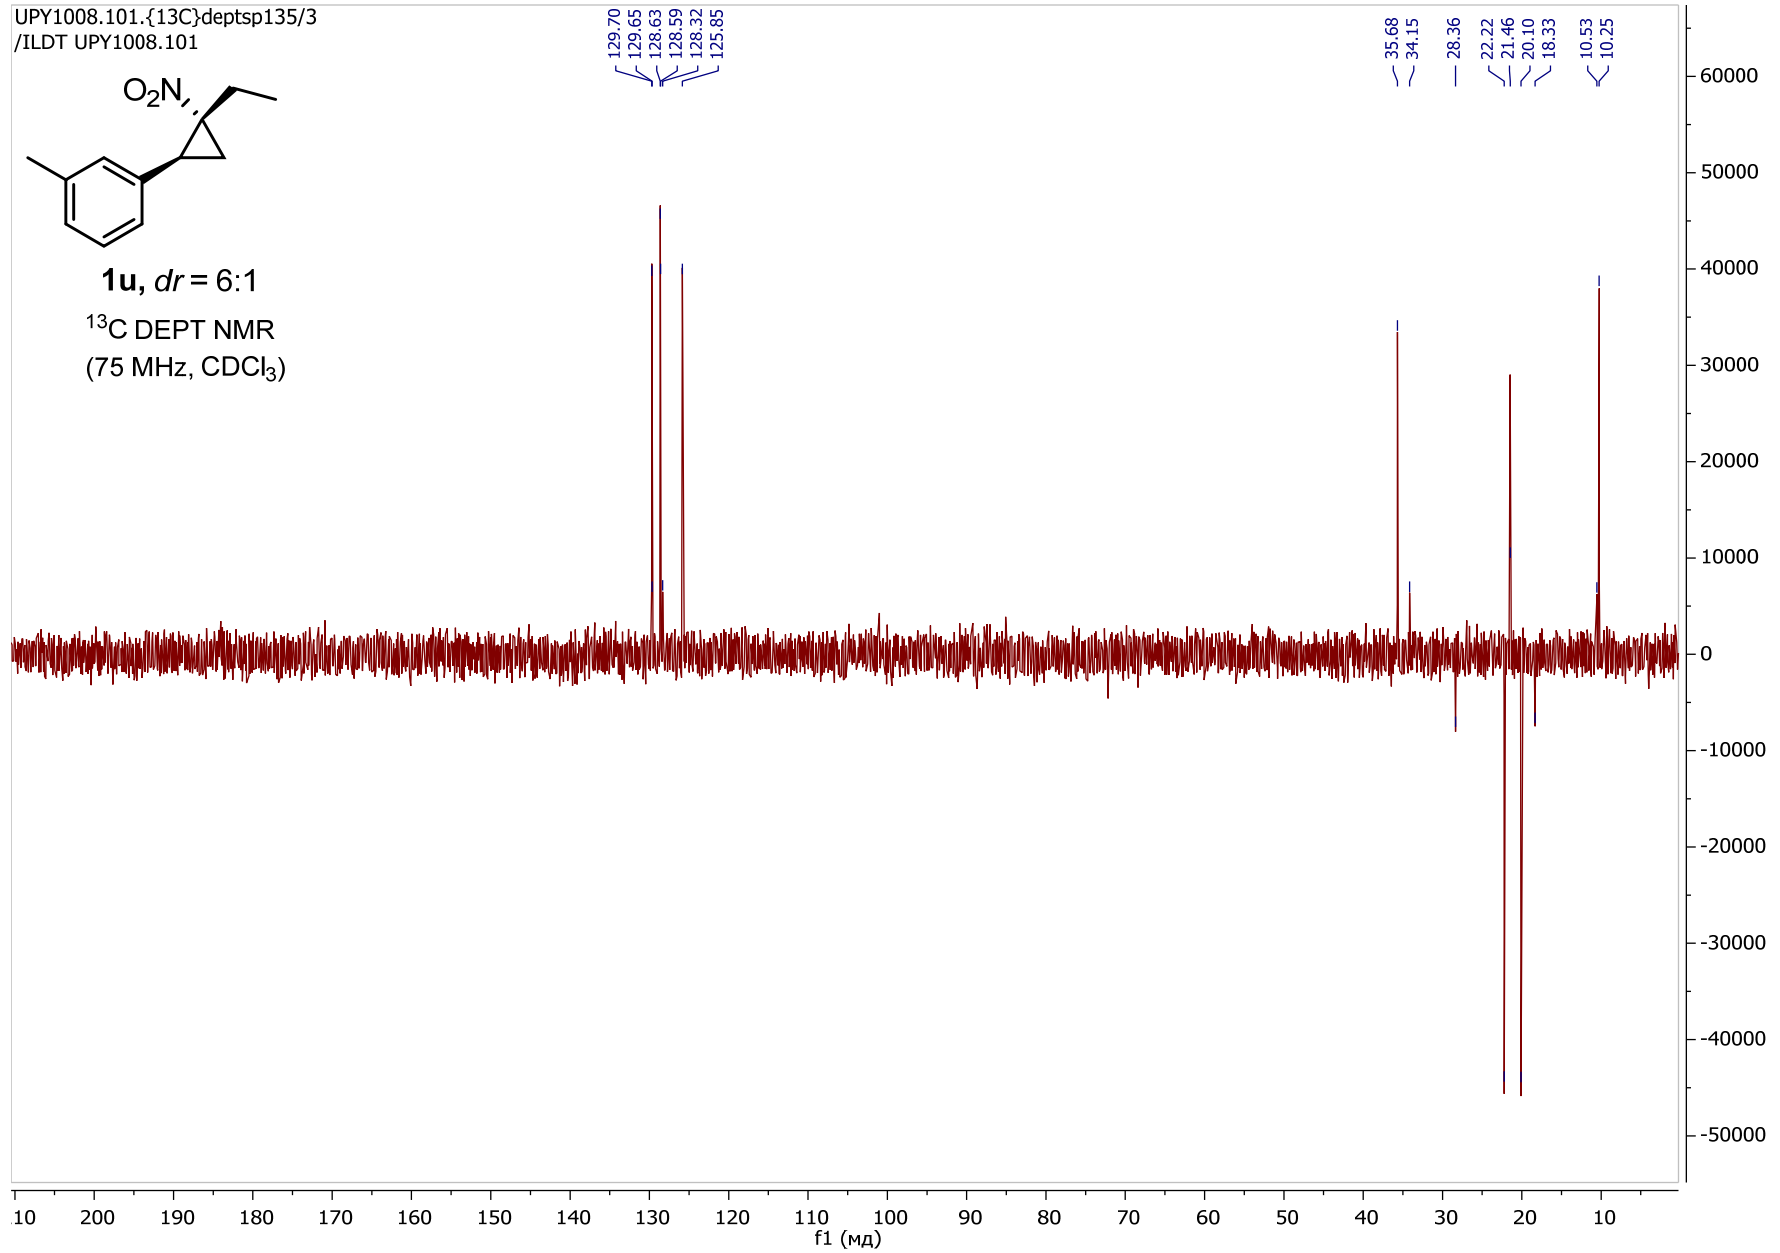



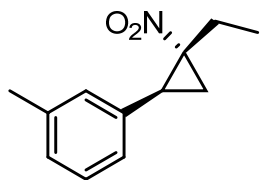

**1u**, *dr* = 6:1

### NMR of **1u**

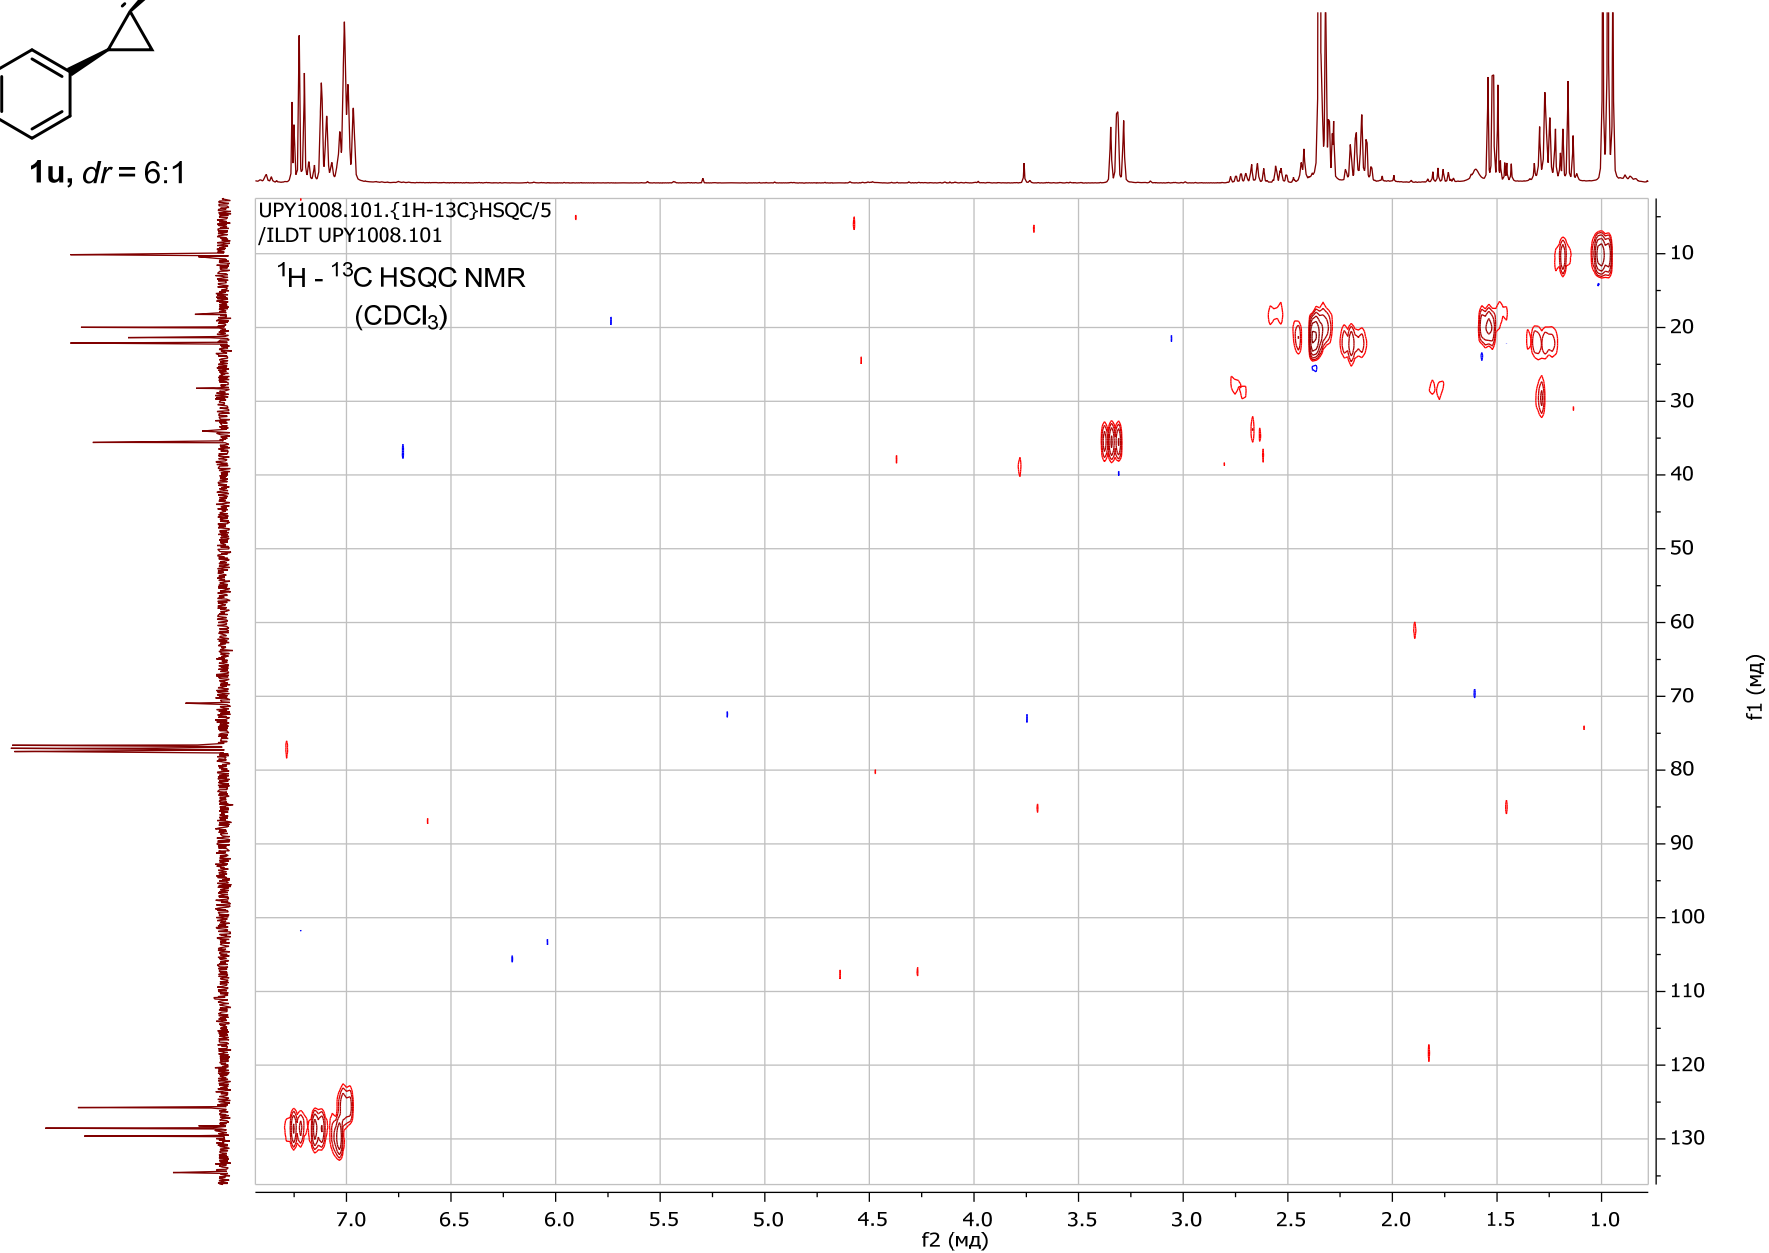

# NMR of **1u**

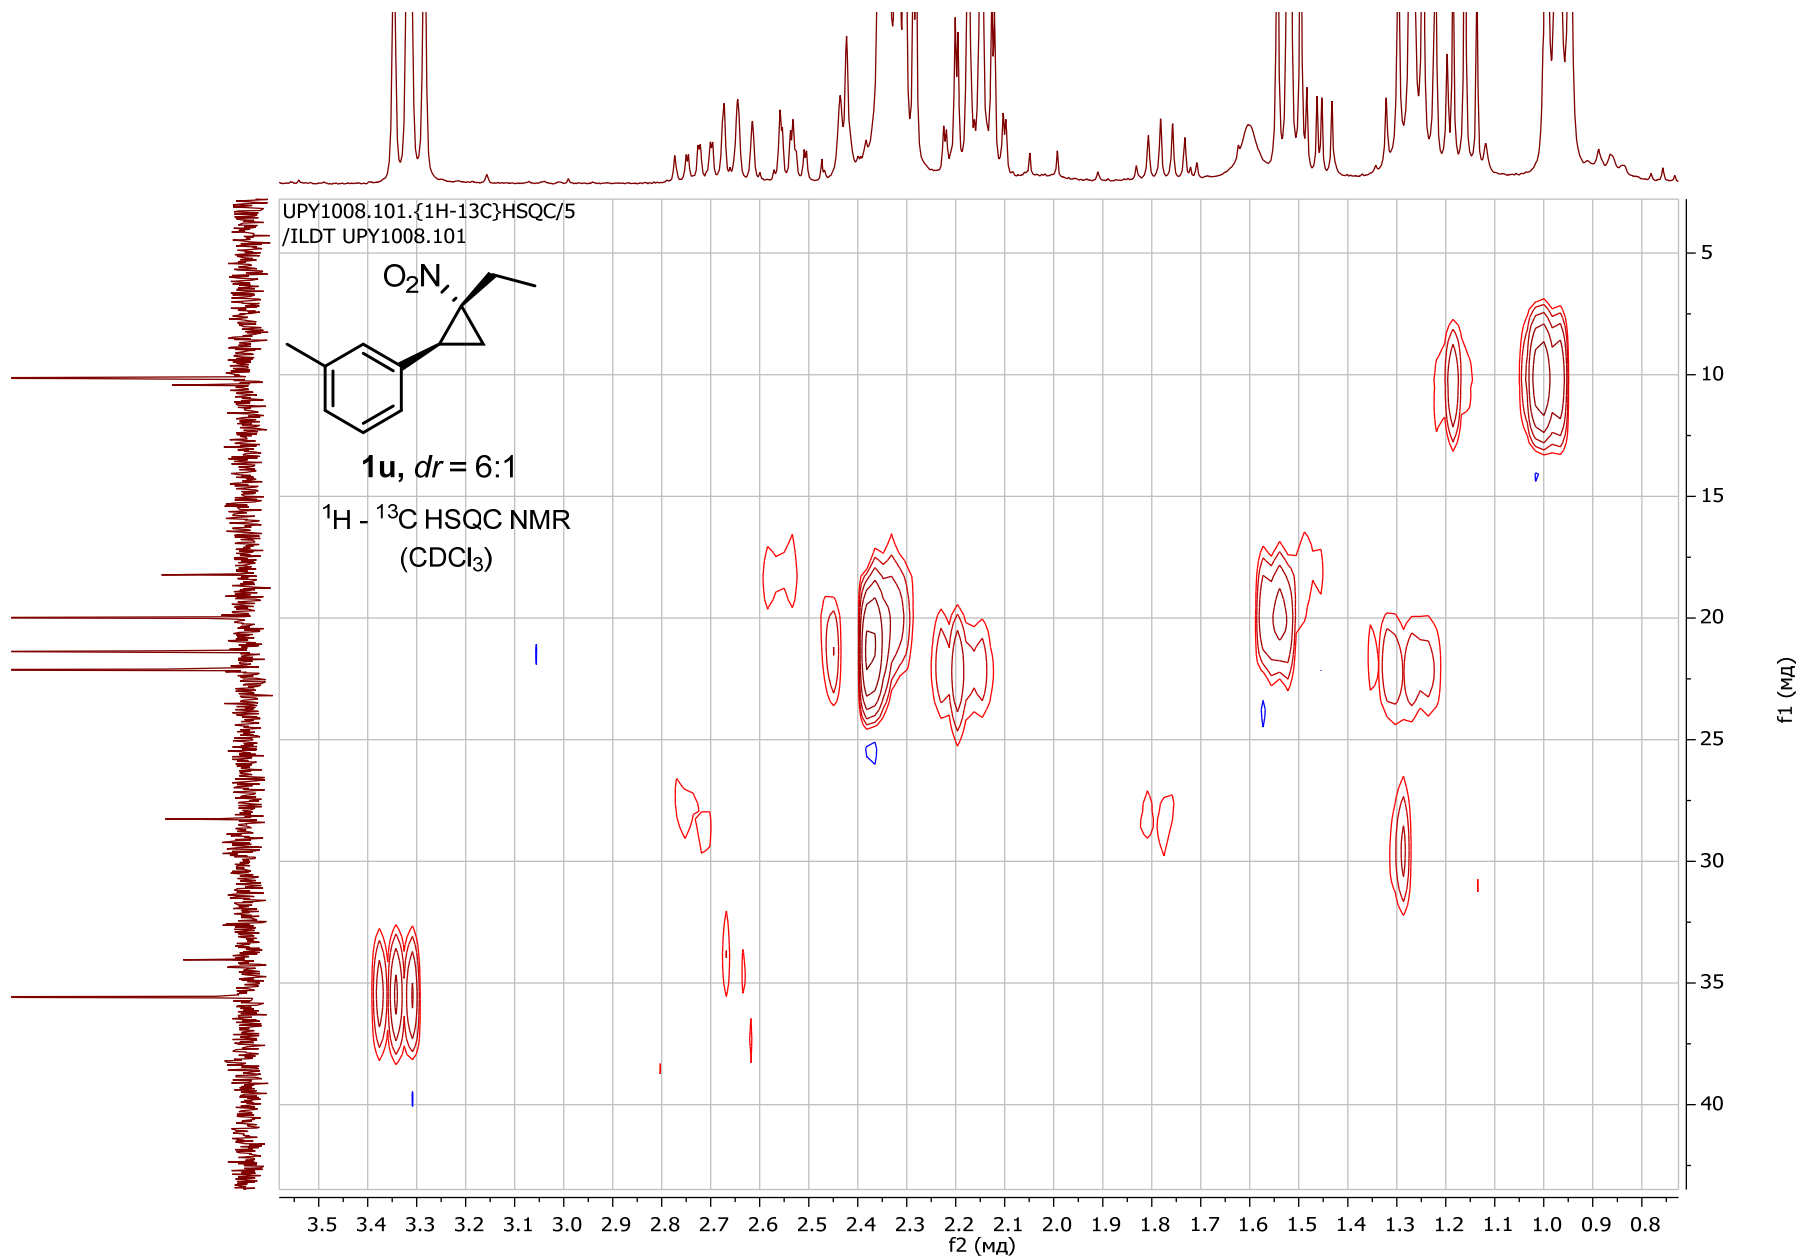

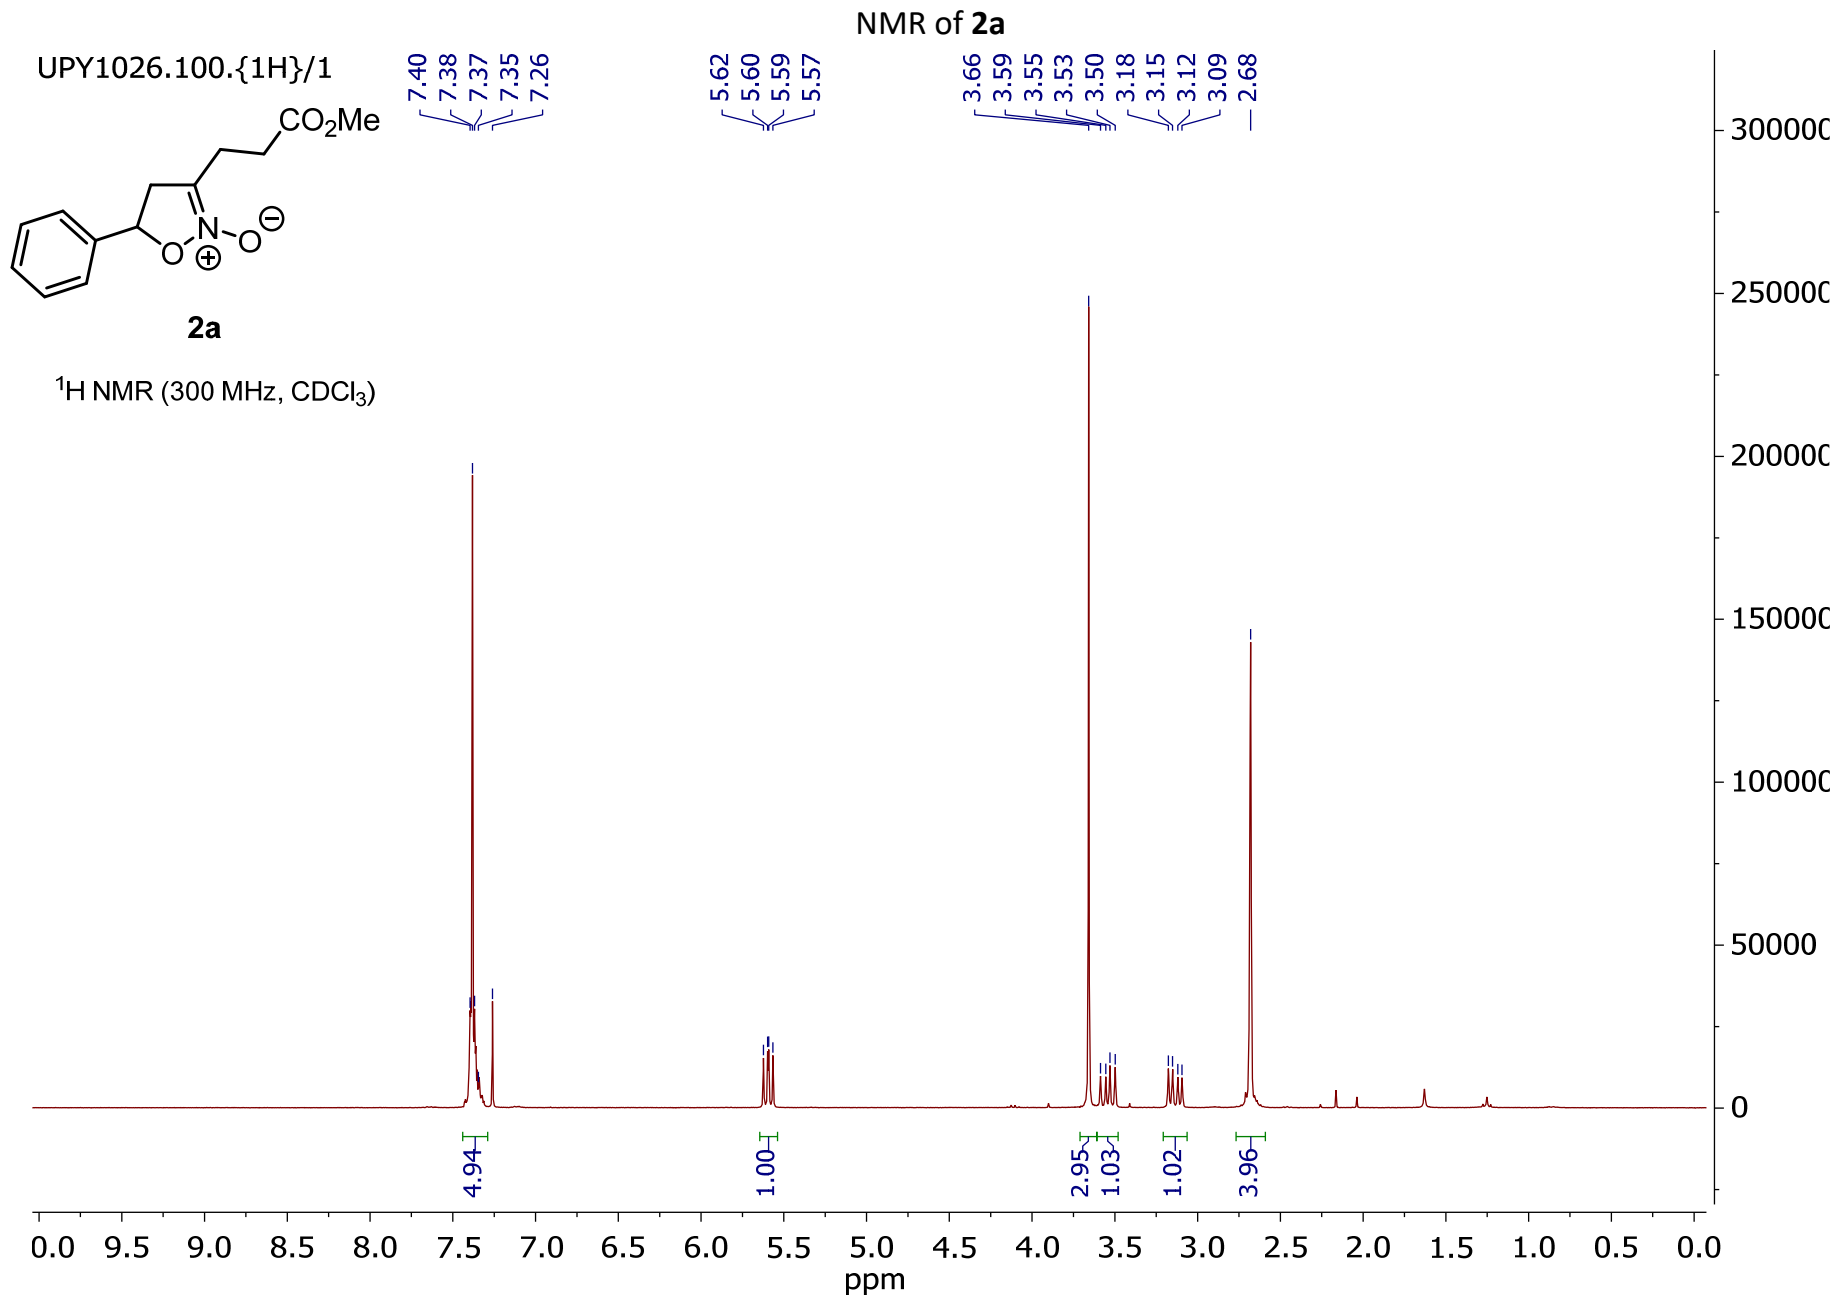

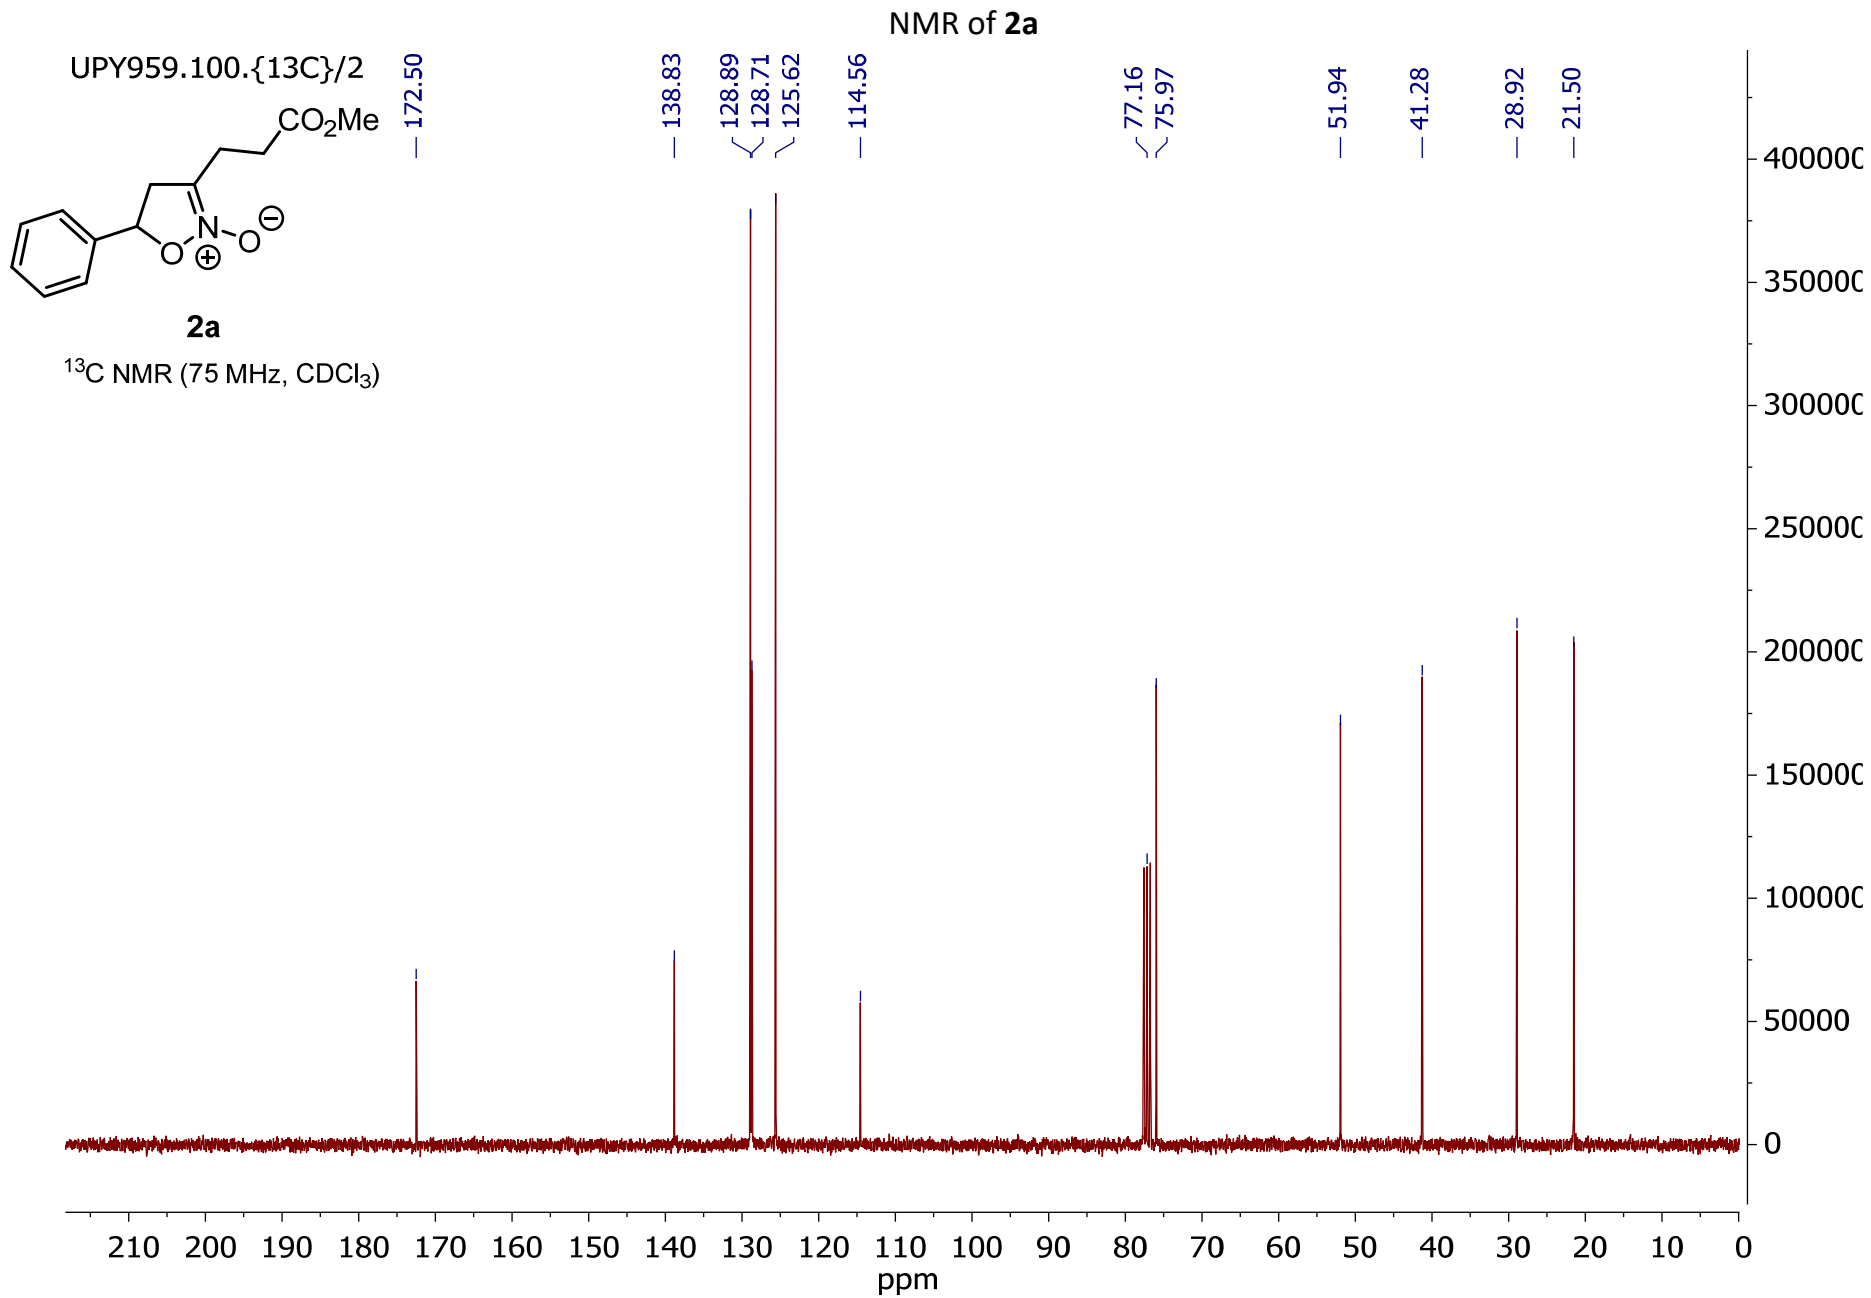

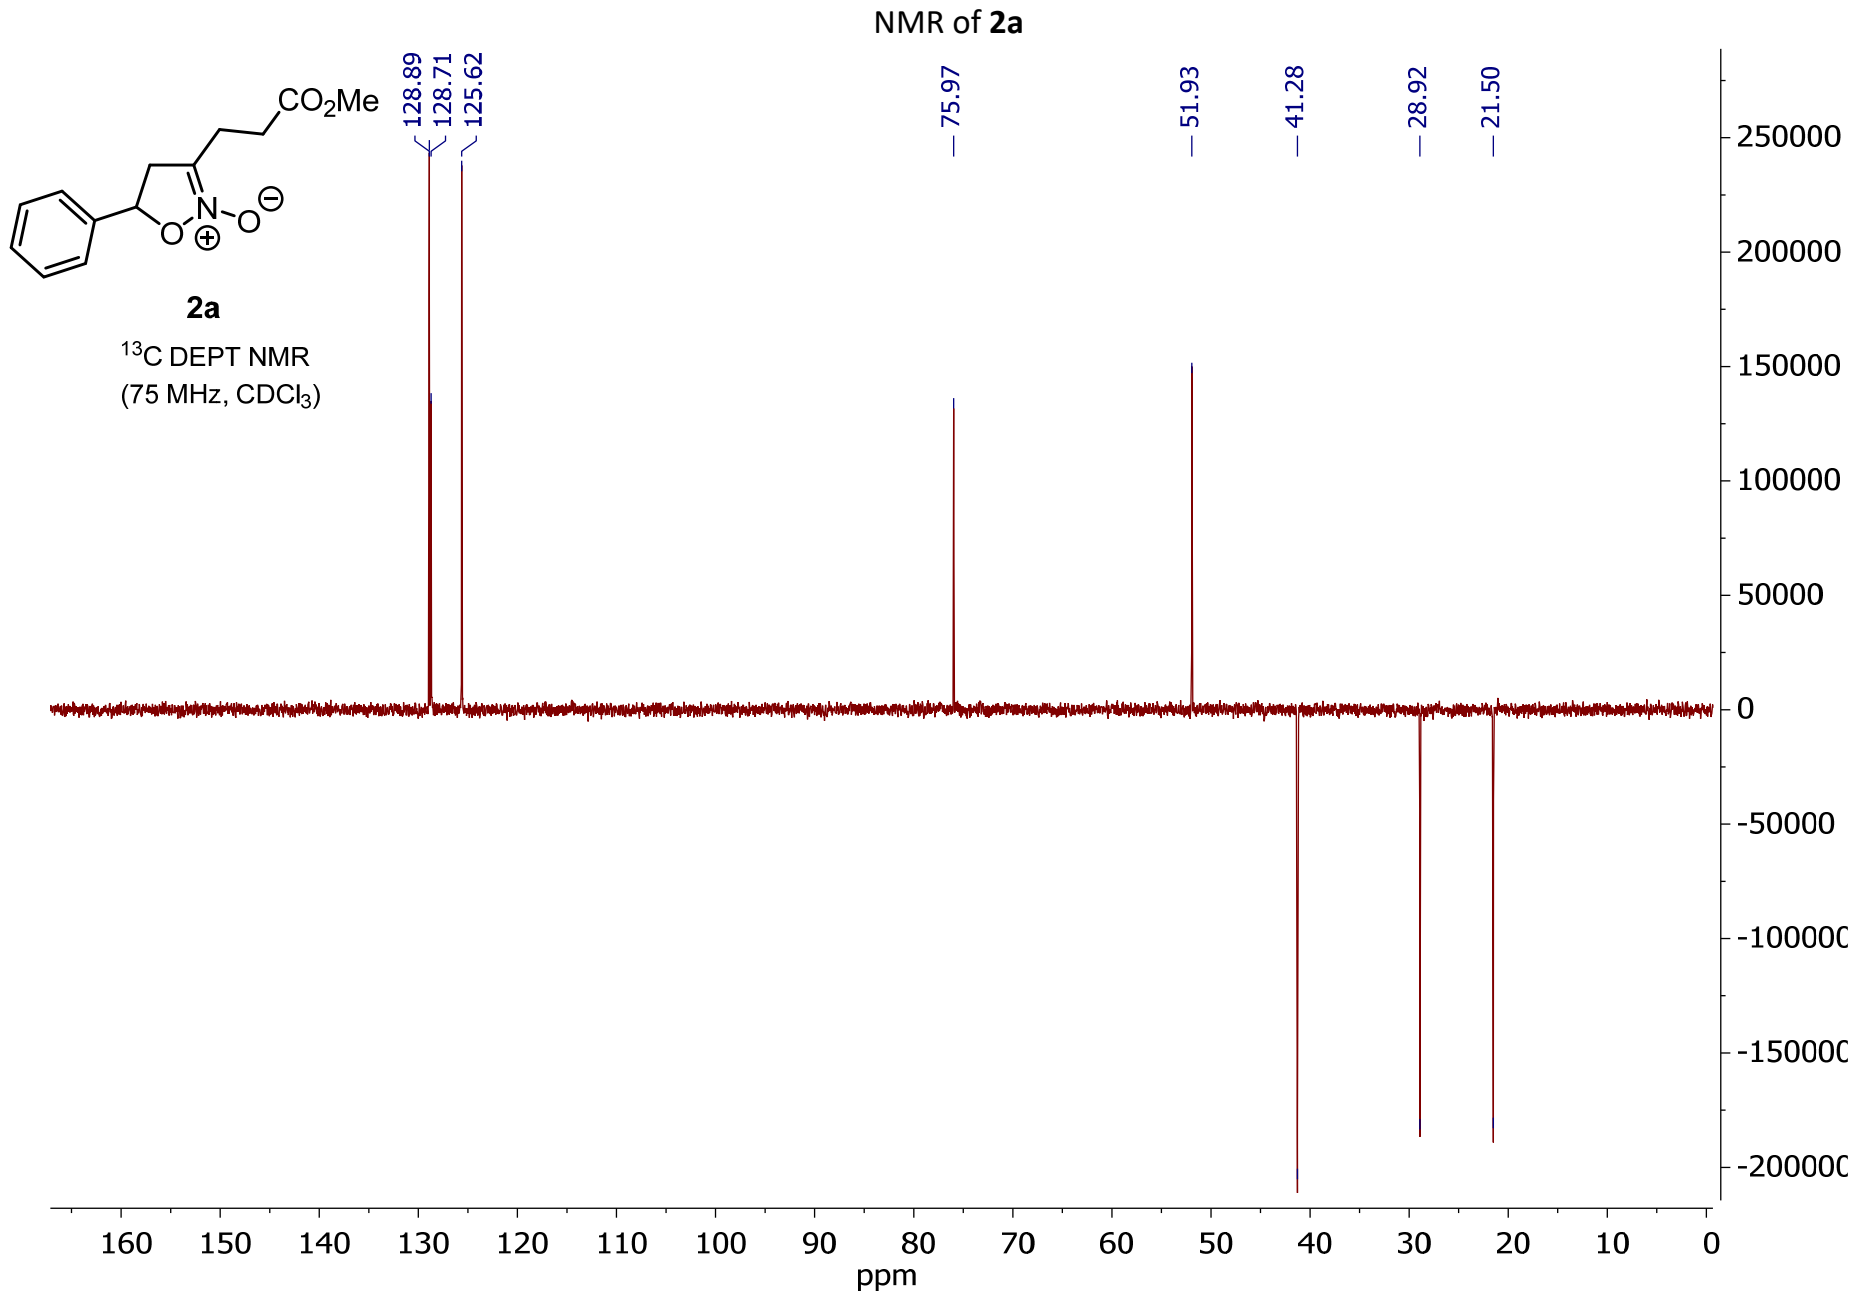

# FTIR (ATR) of 2a

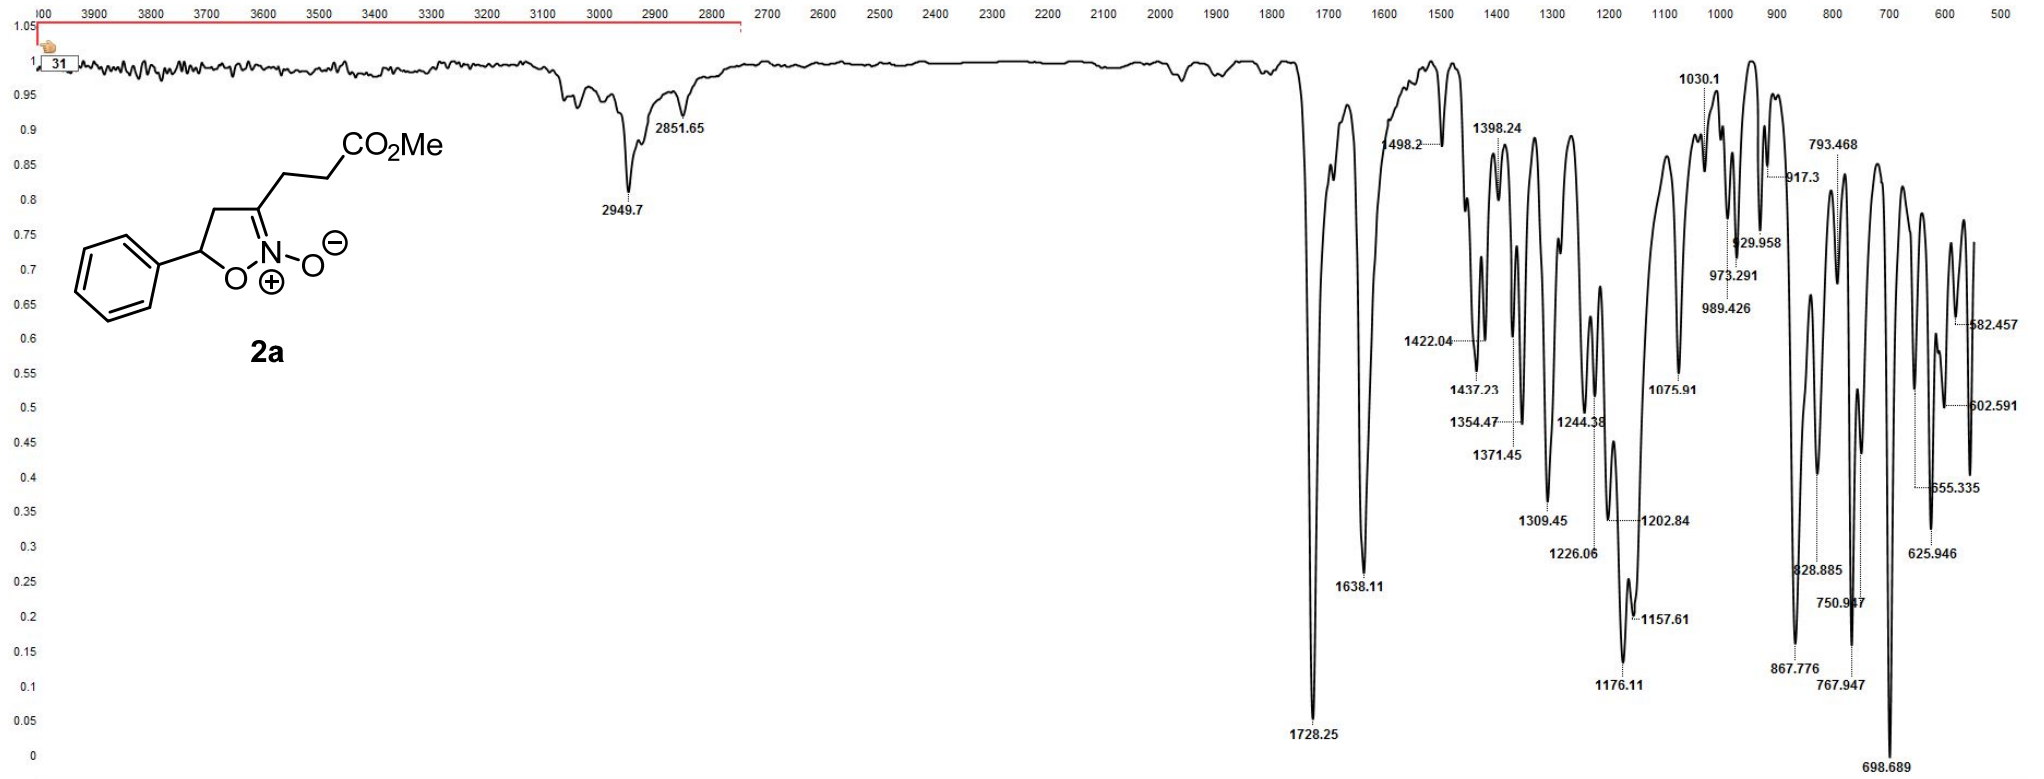

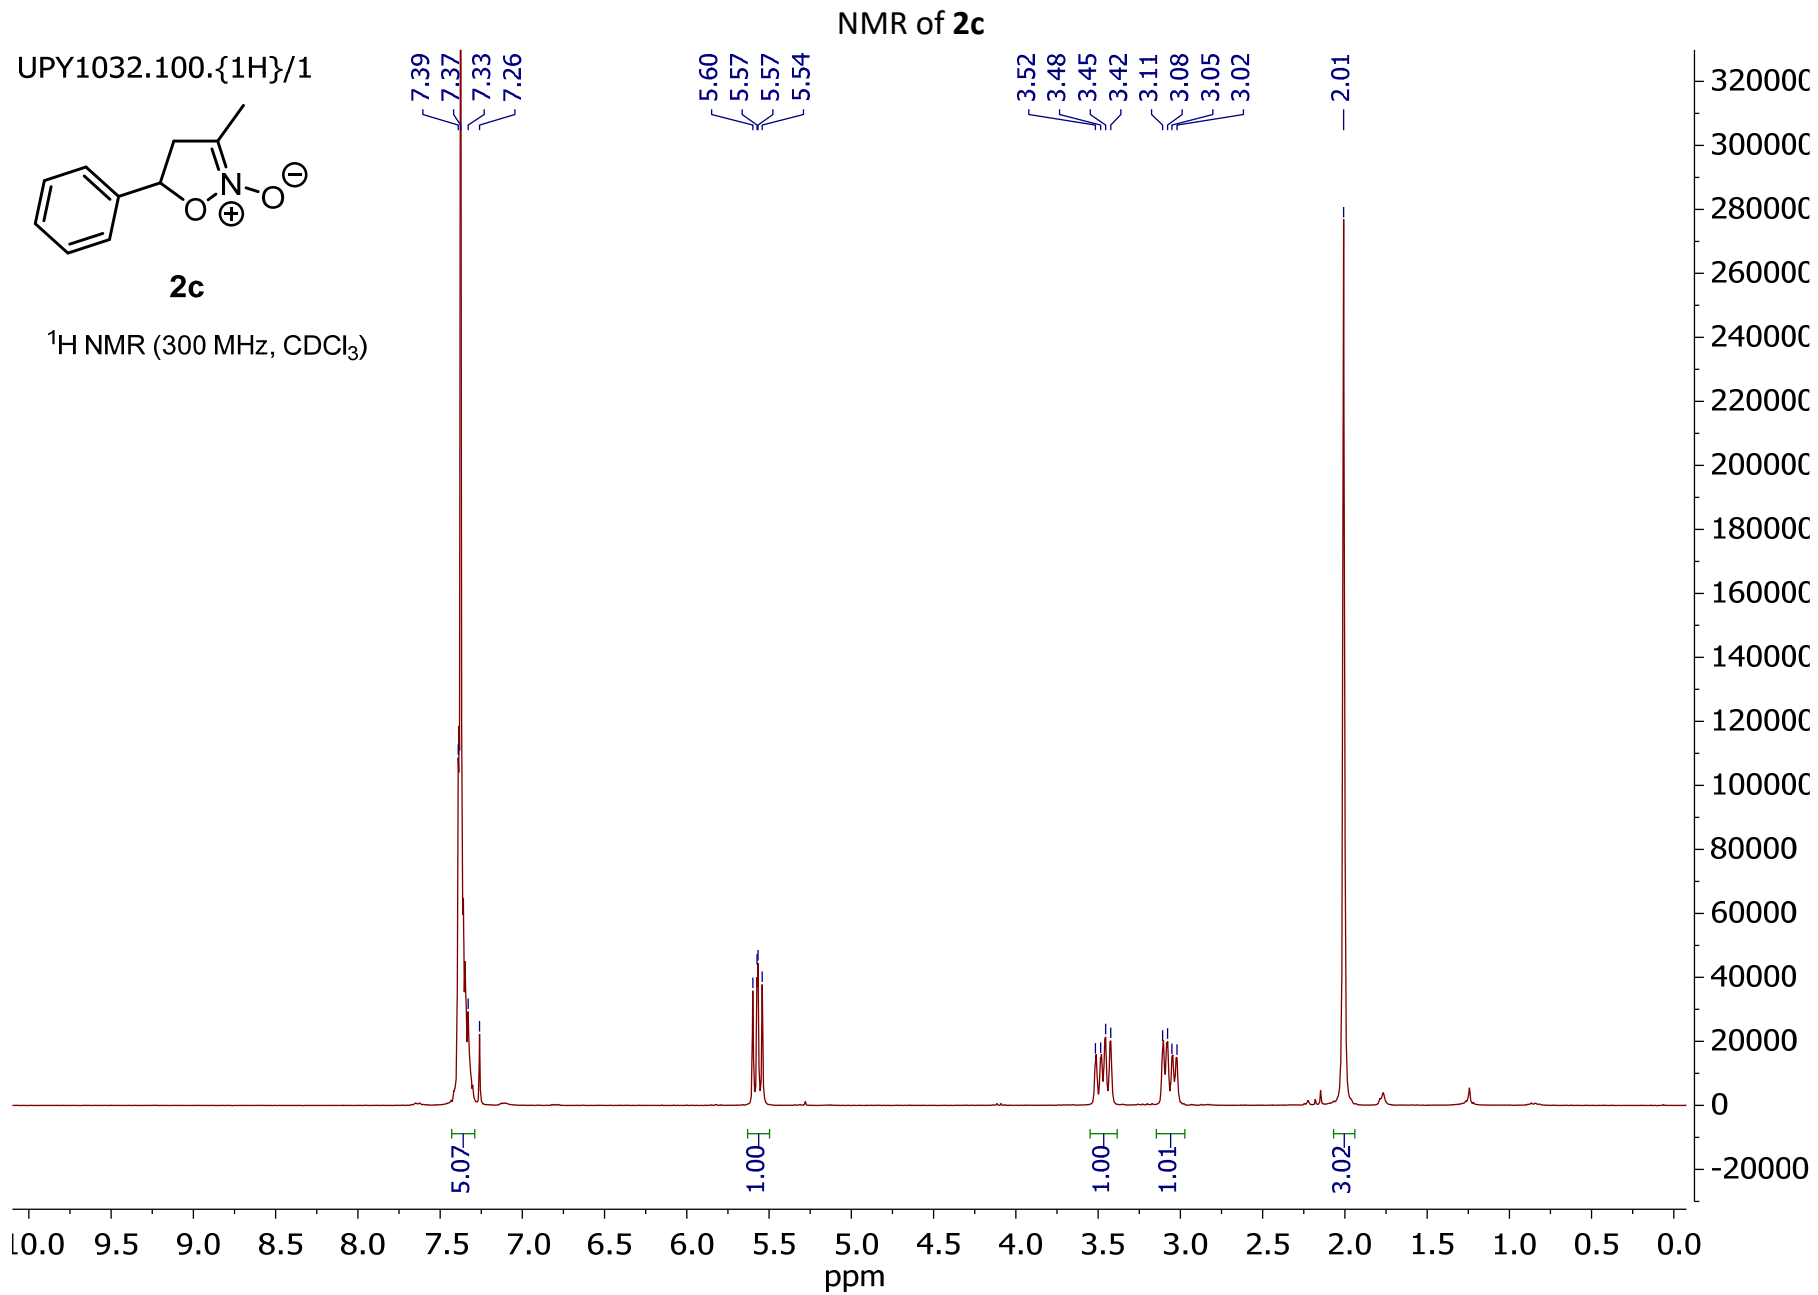

UPY1027.100.{1H}/1

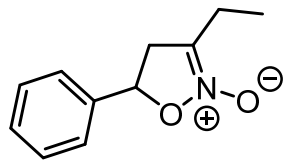

**2d**

<sup>1</sup>H NMR (300 MHz, CDCl<sub>3</sub>)

NMR of **2d**

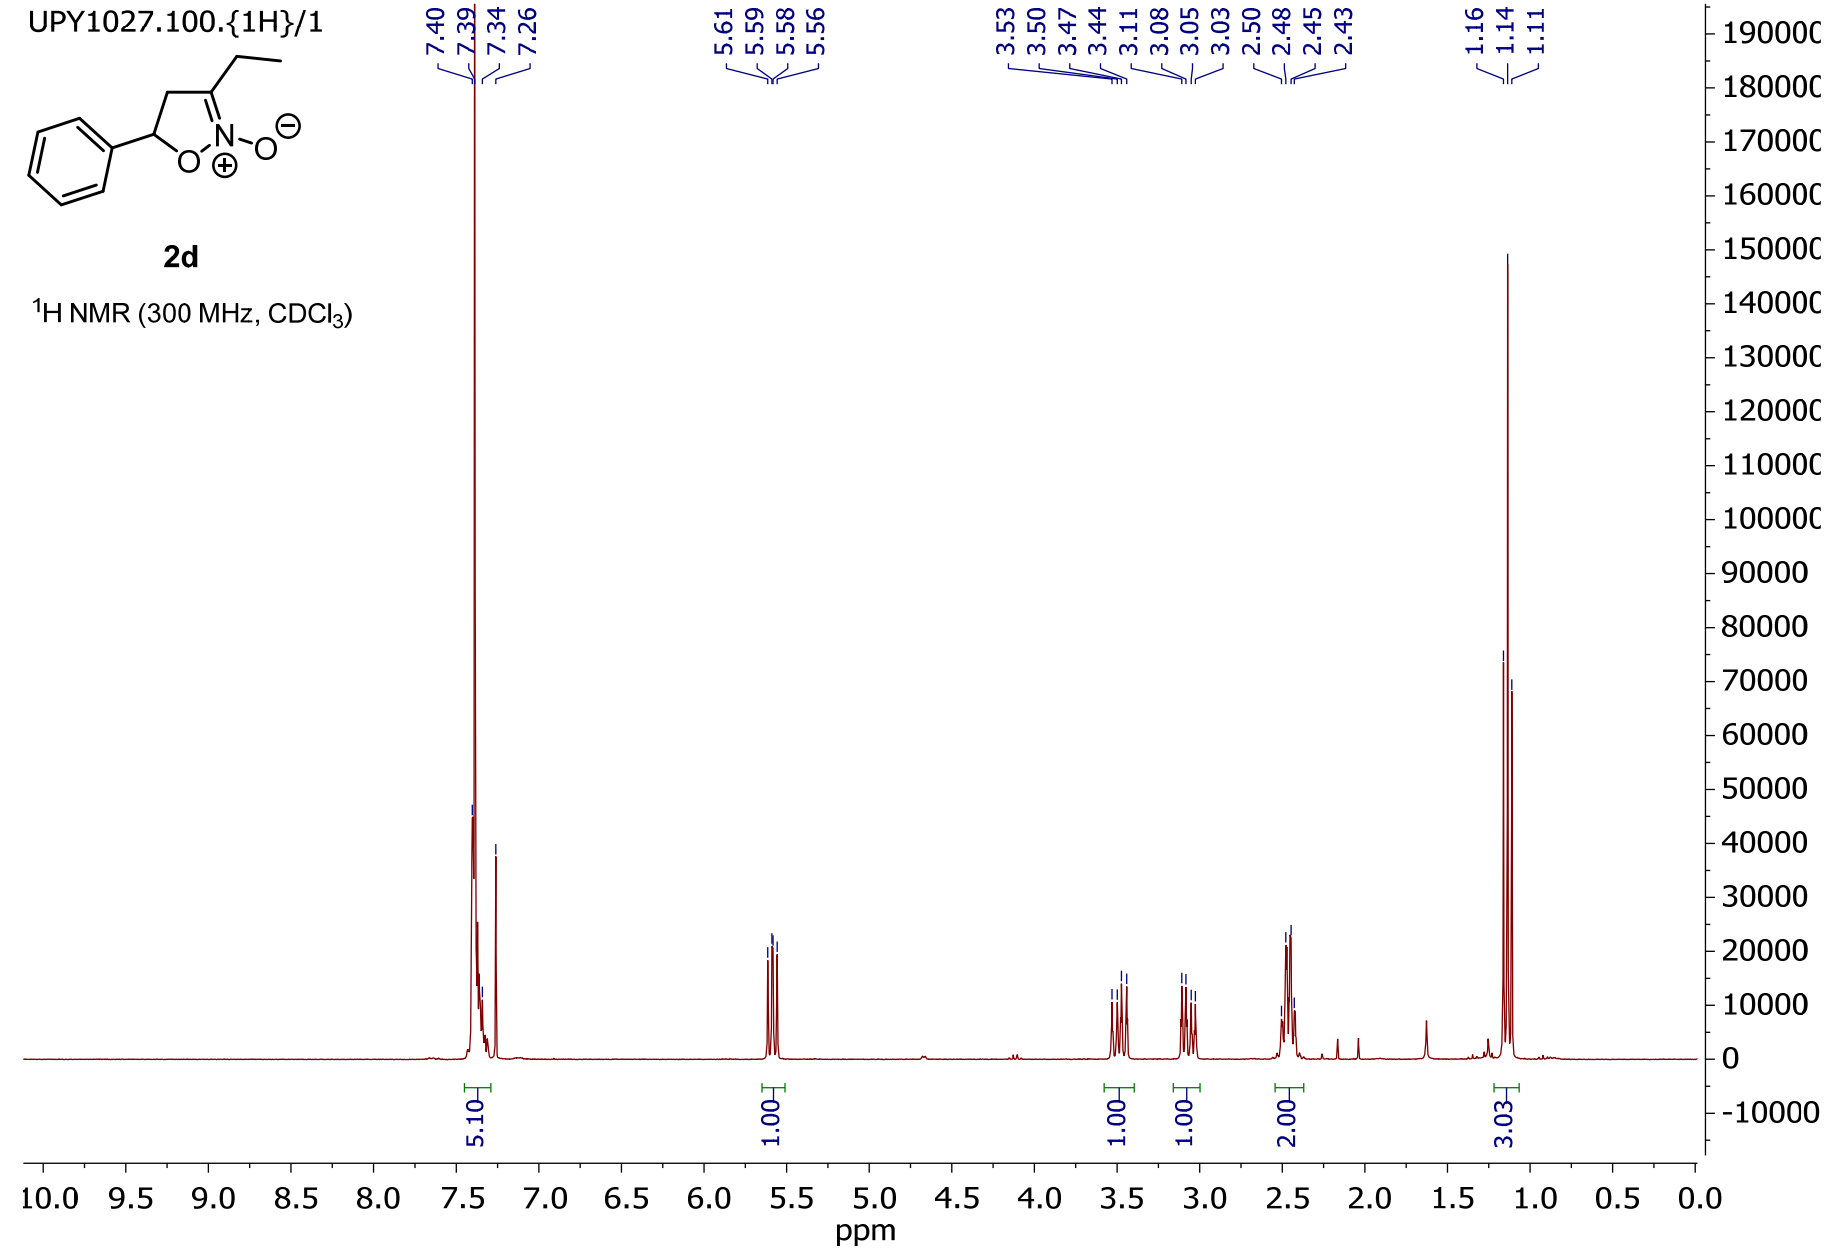



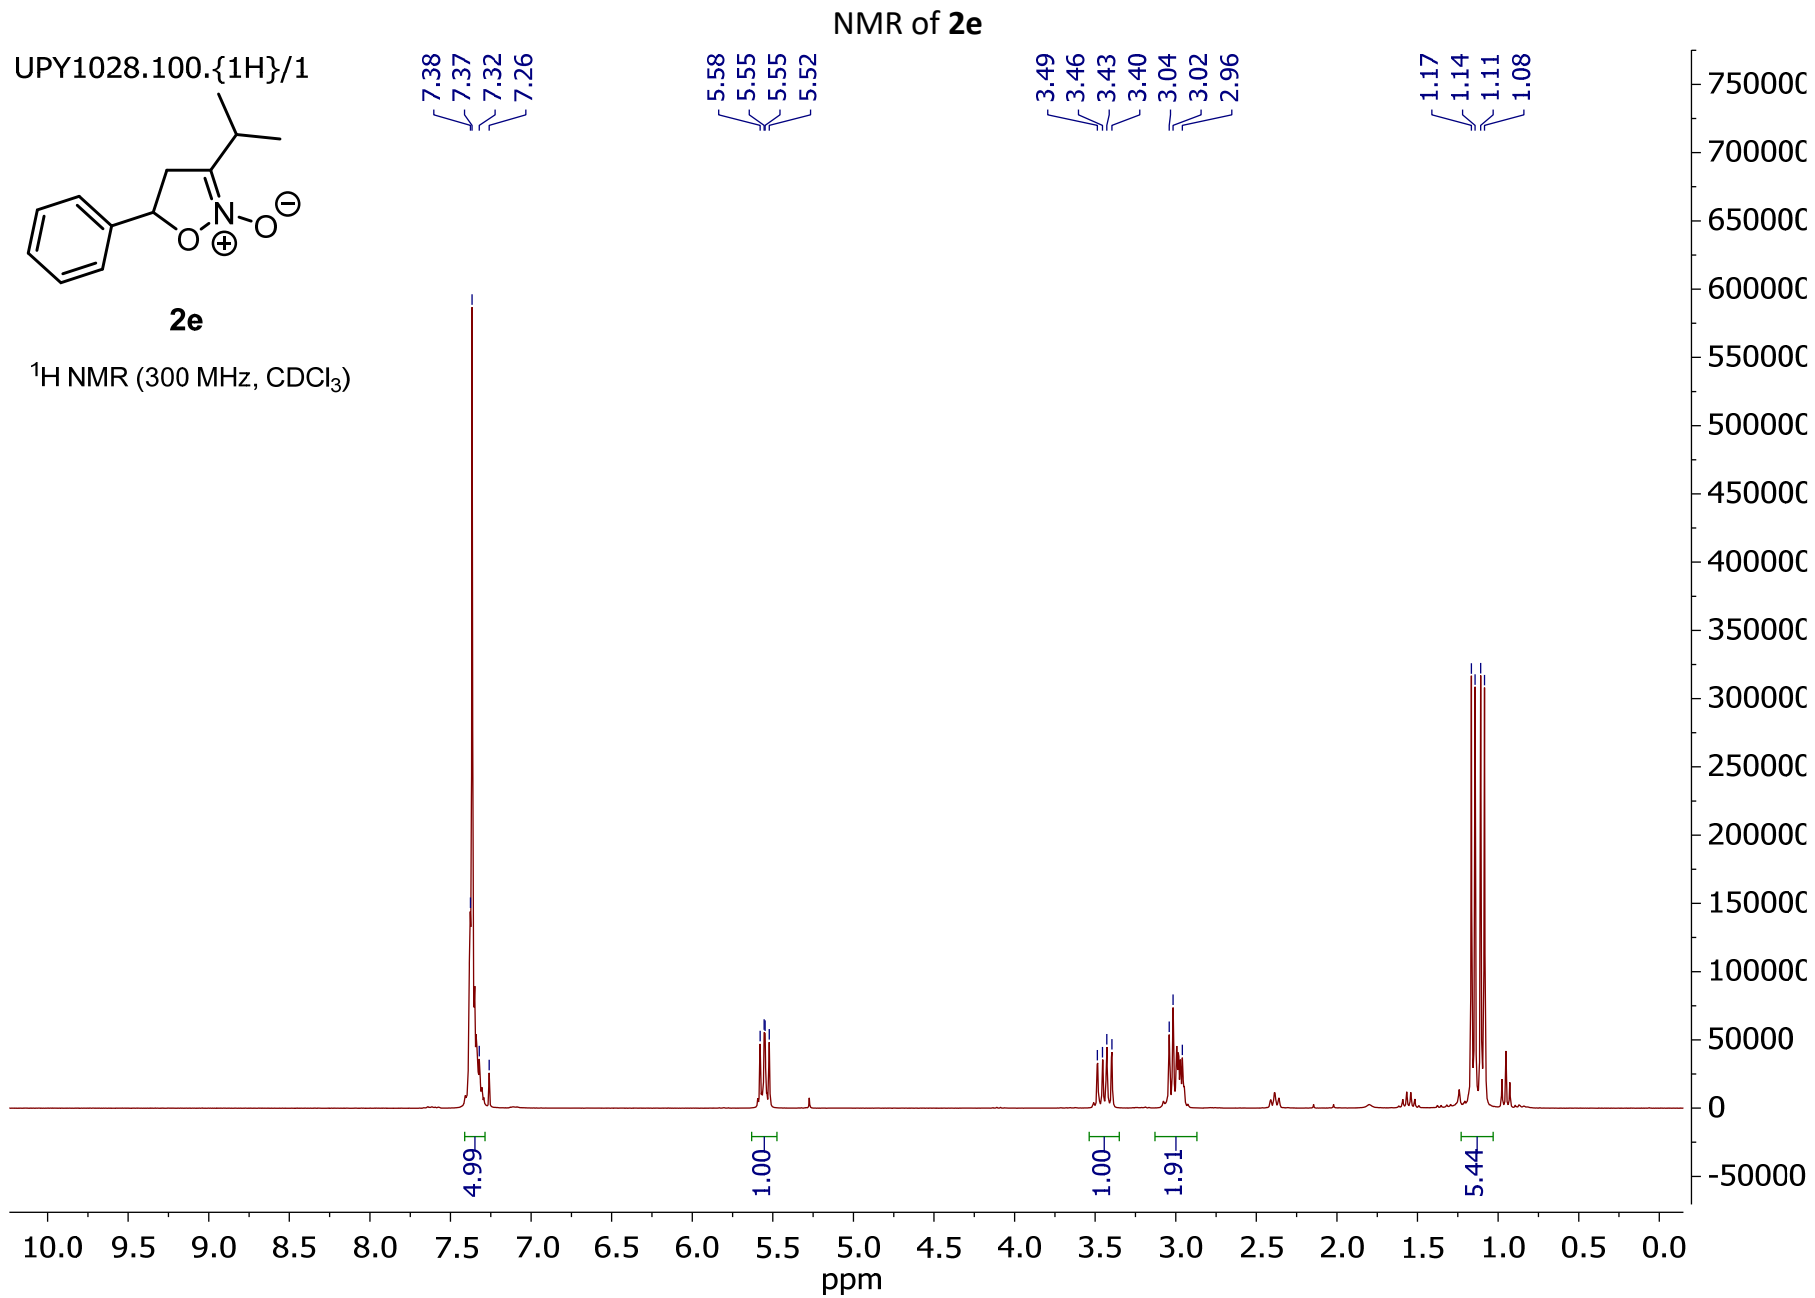

UPY1028.100.{13C}/2

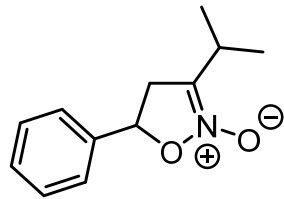

**2e**

<sup>13</sup>C NMR (75 MHz, CDCl<sub>3</sub>)

NMR of **2e**

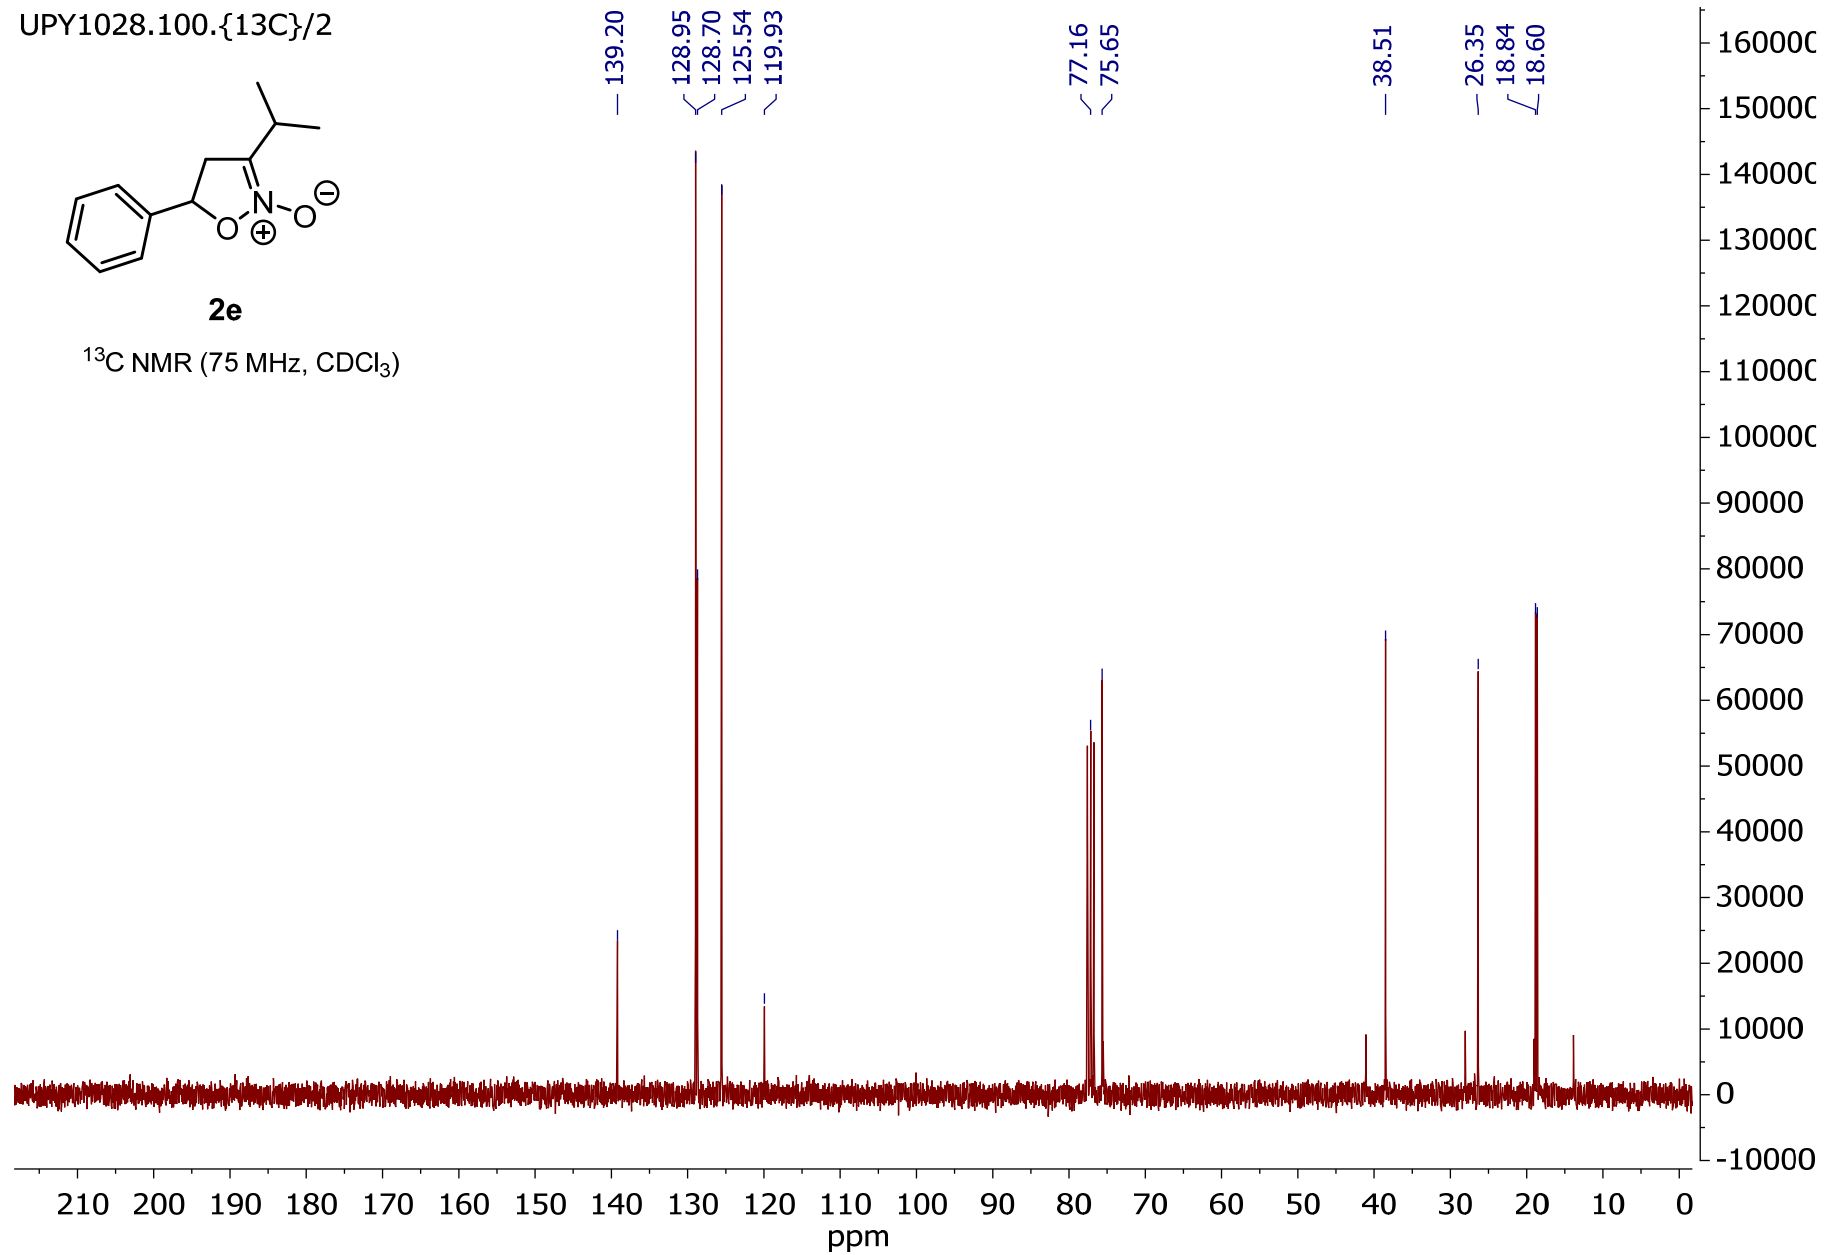

UPY1028.100.{13C}depts135/3

### NMR of 2e

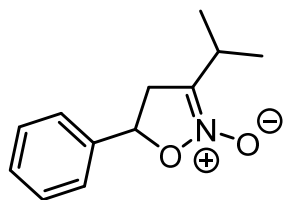

**2e**

<sup>13</sup>C DEPT NMR  
(75 MHz, CDCl<sub>3</sub>)

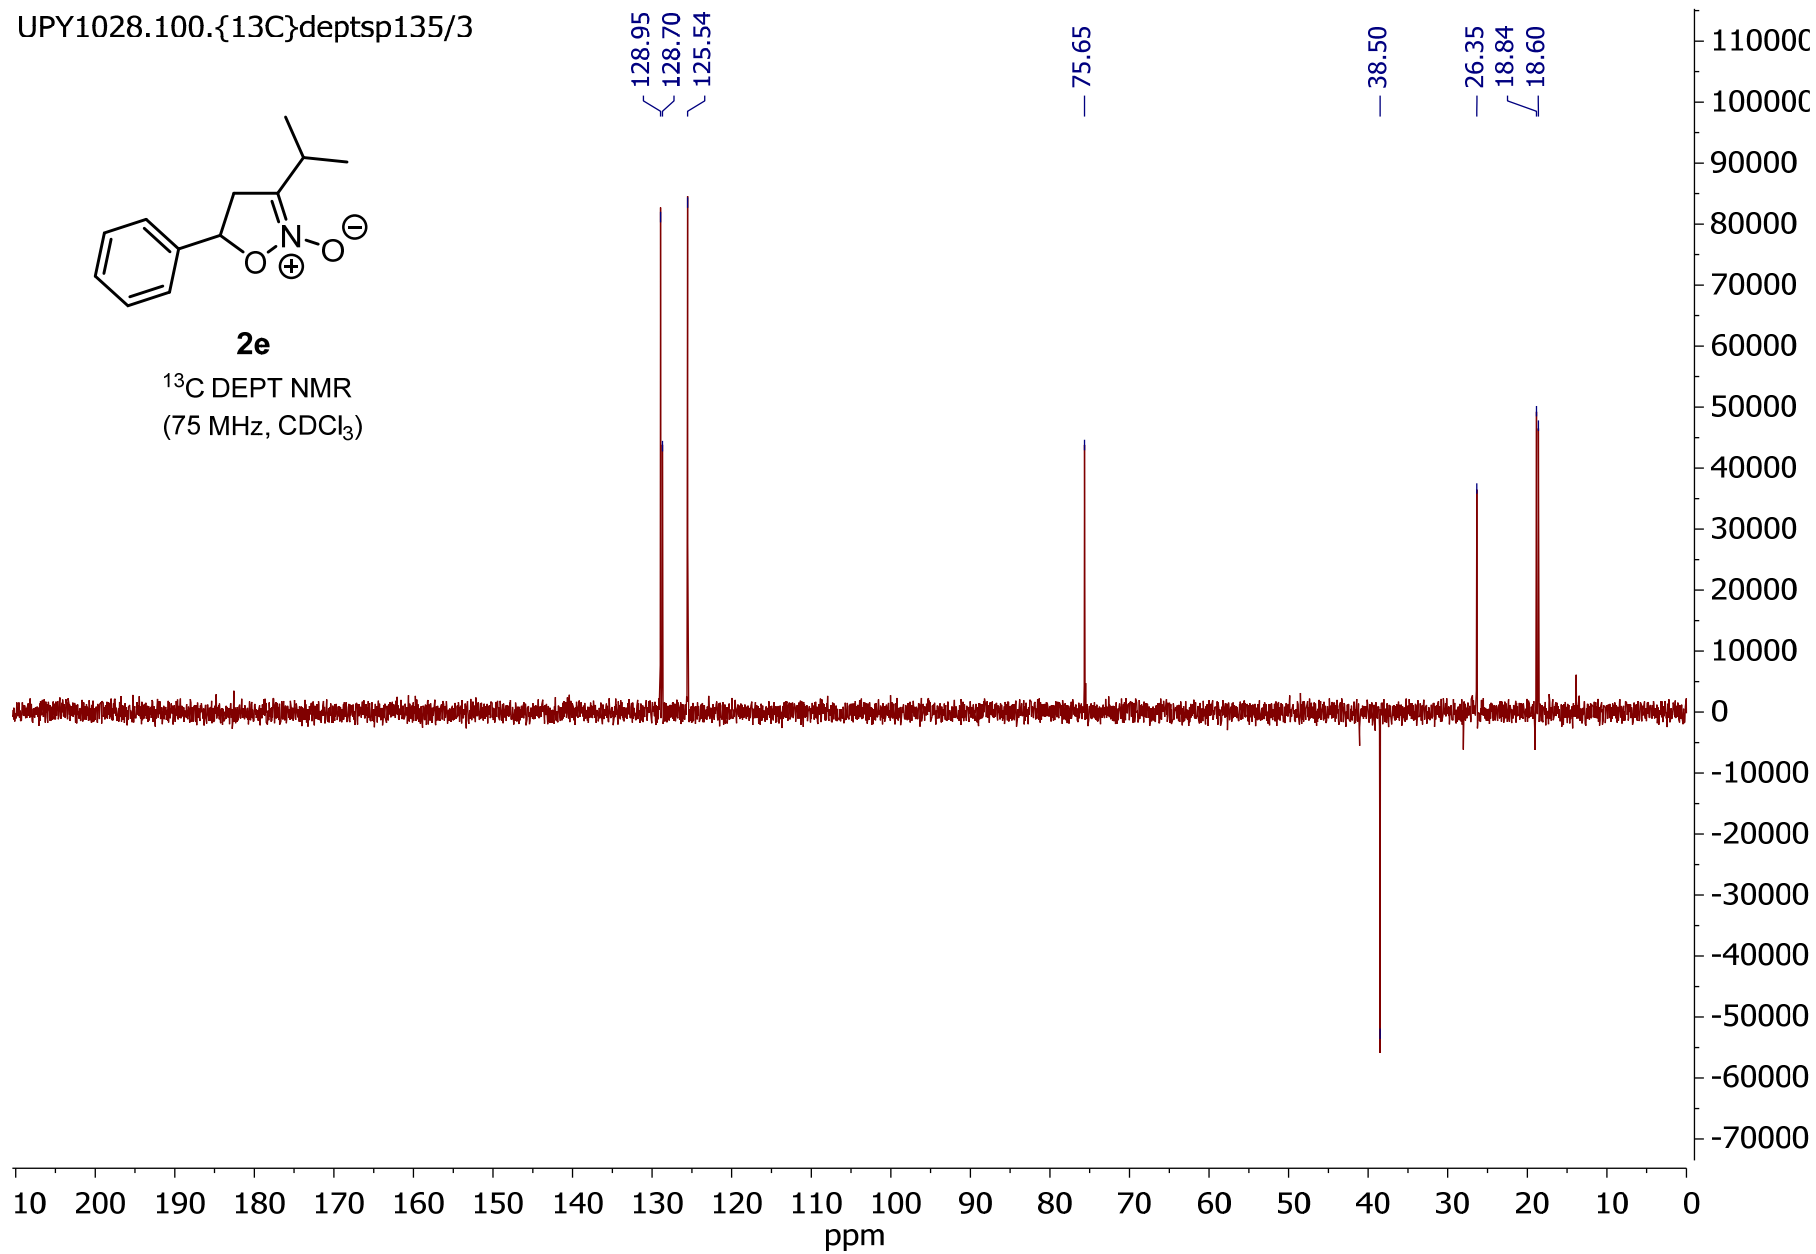

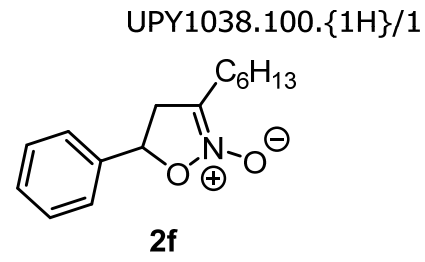

<sup>1</sup>H NMR (300 MHz, CDCl<sub>3</sub>)

NMR of **2f**

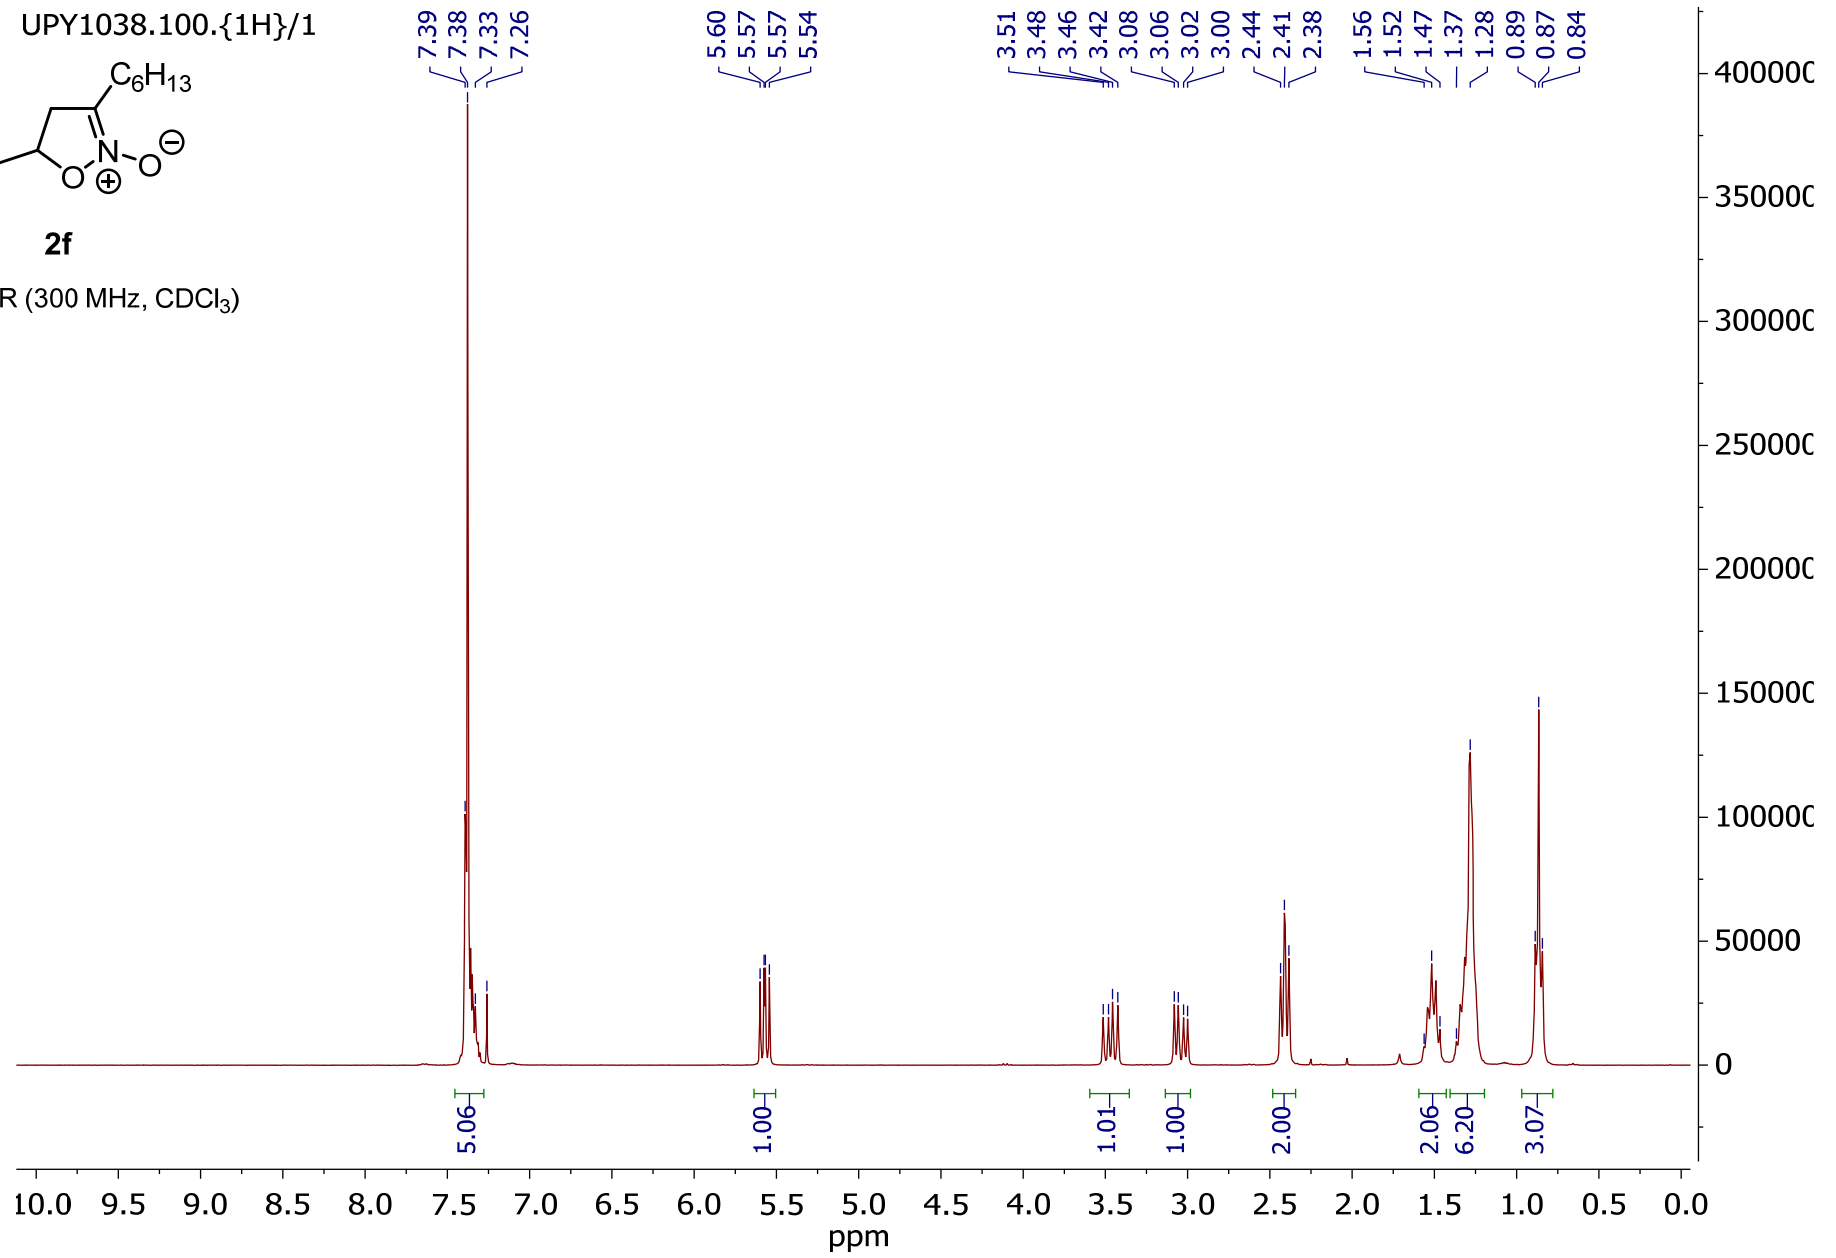

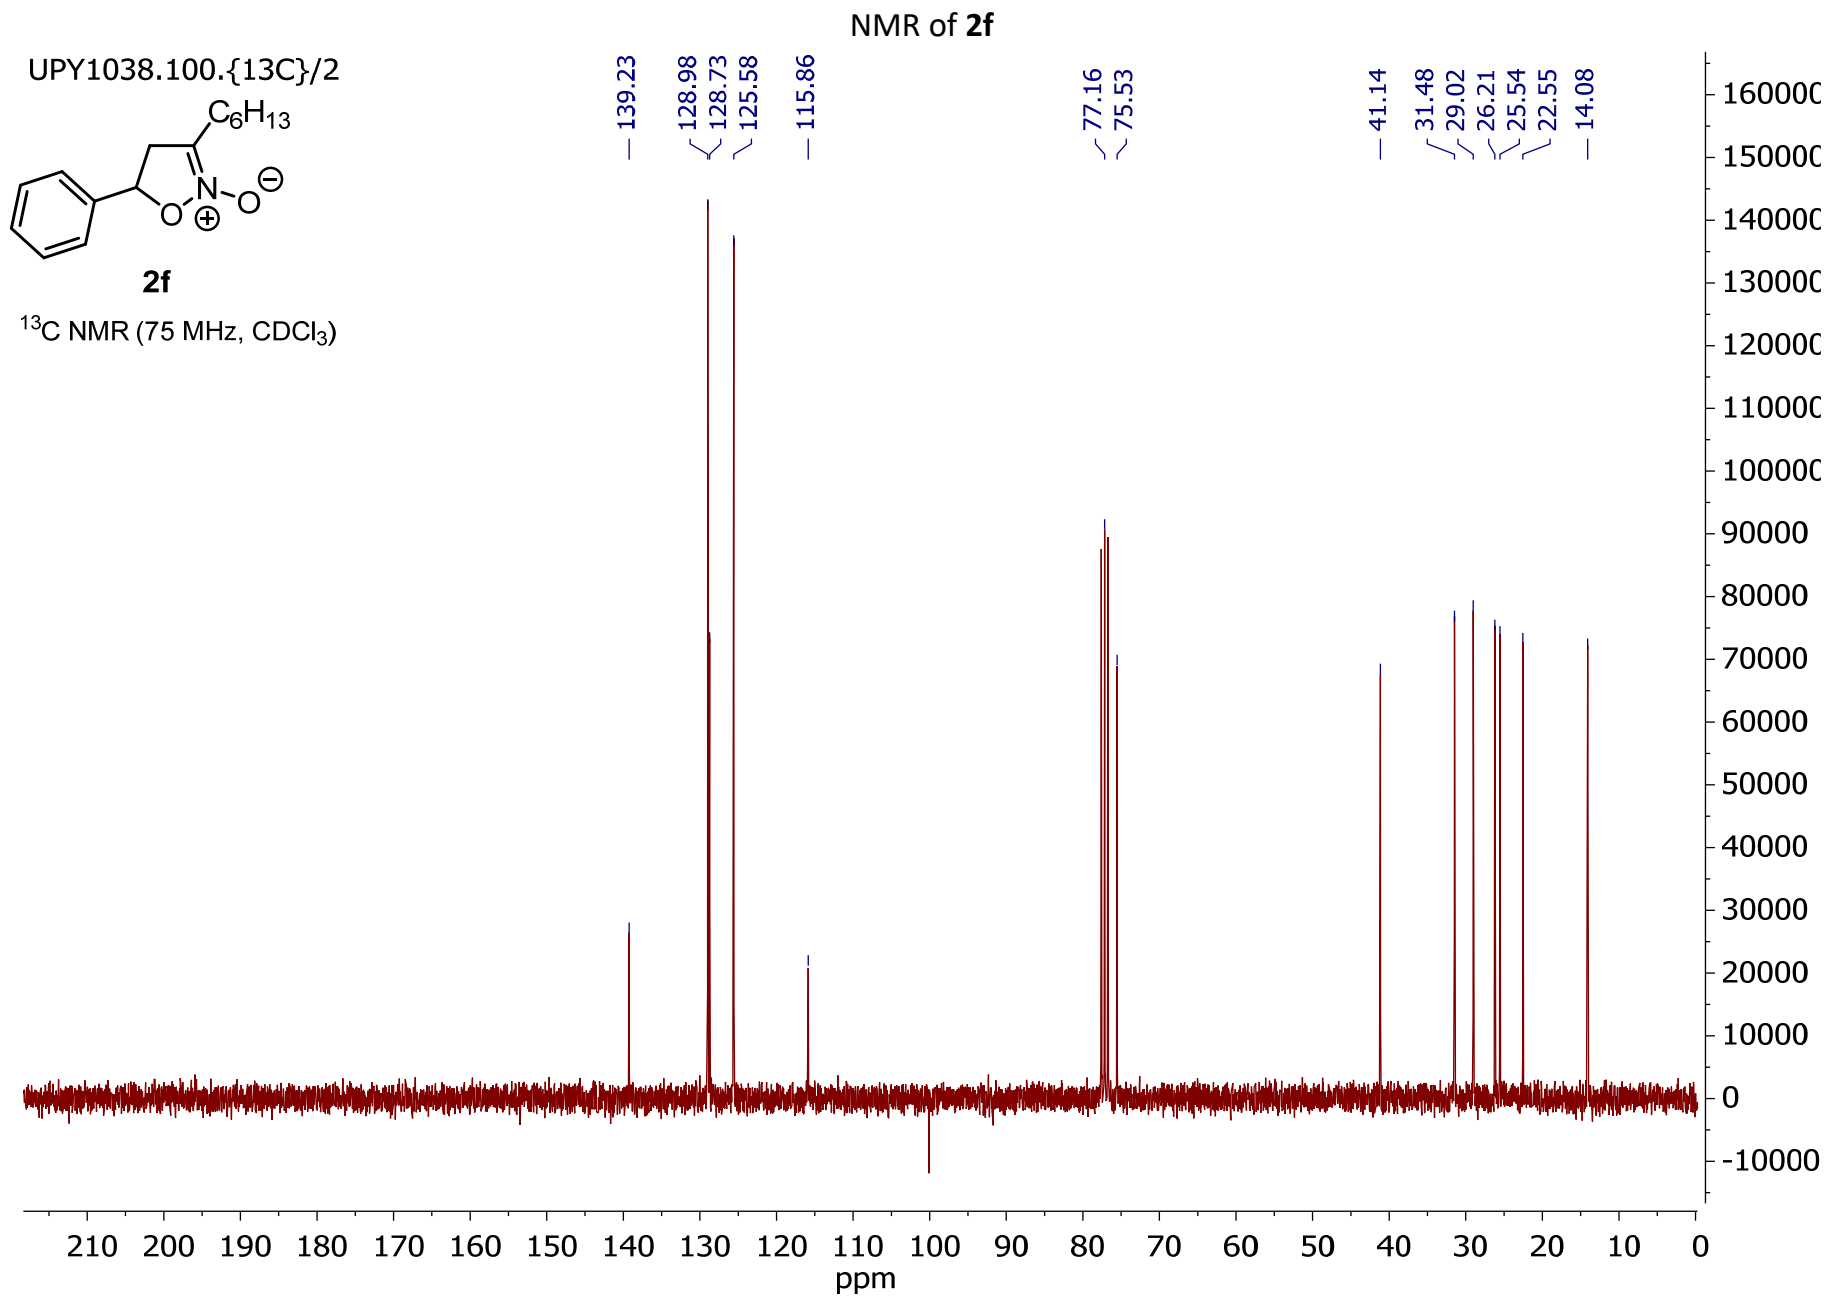

UPY1038.100.{13C}depts135/3

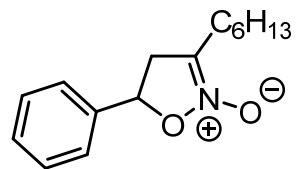

**2f**

<sup>13</sup>C DEPT NMR  
(75 MHz, CDCl<sub>3</sub>)

NMR of **2f**

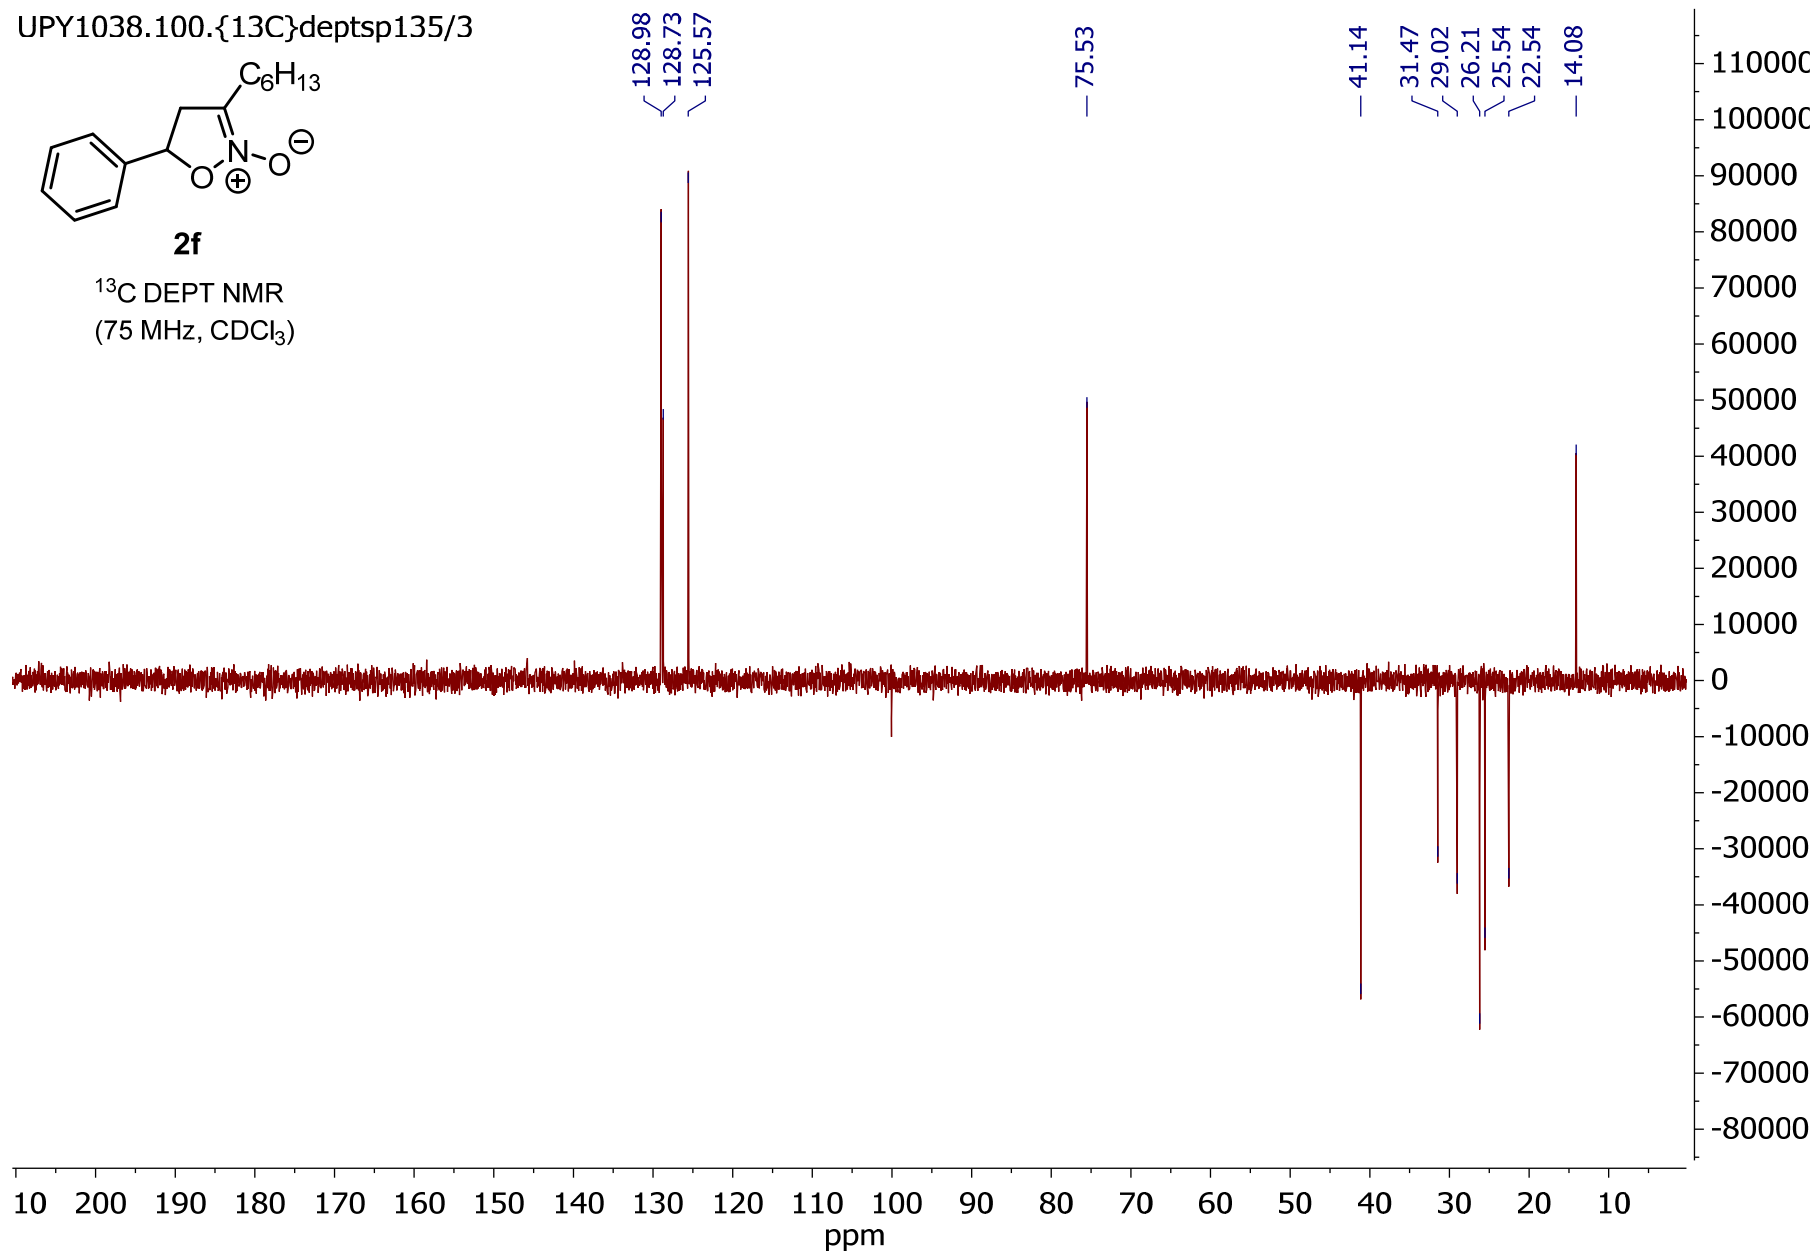

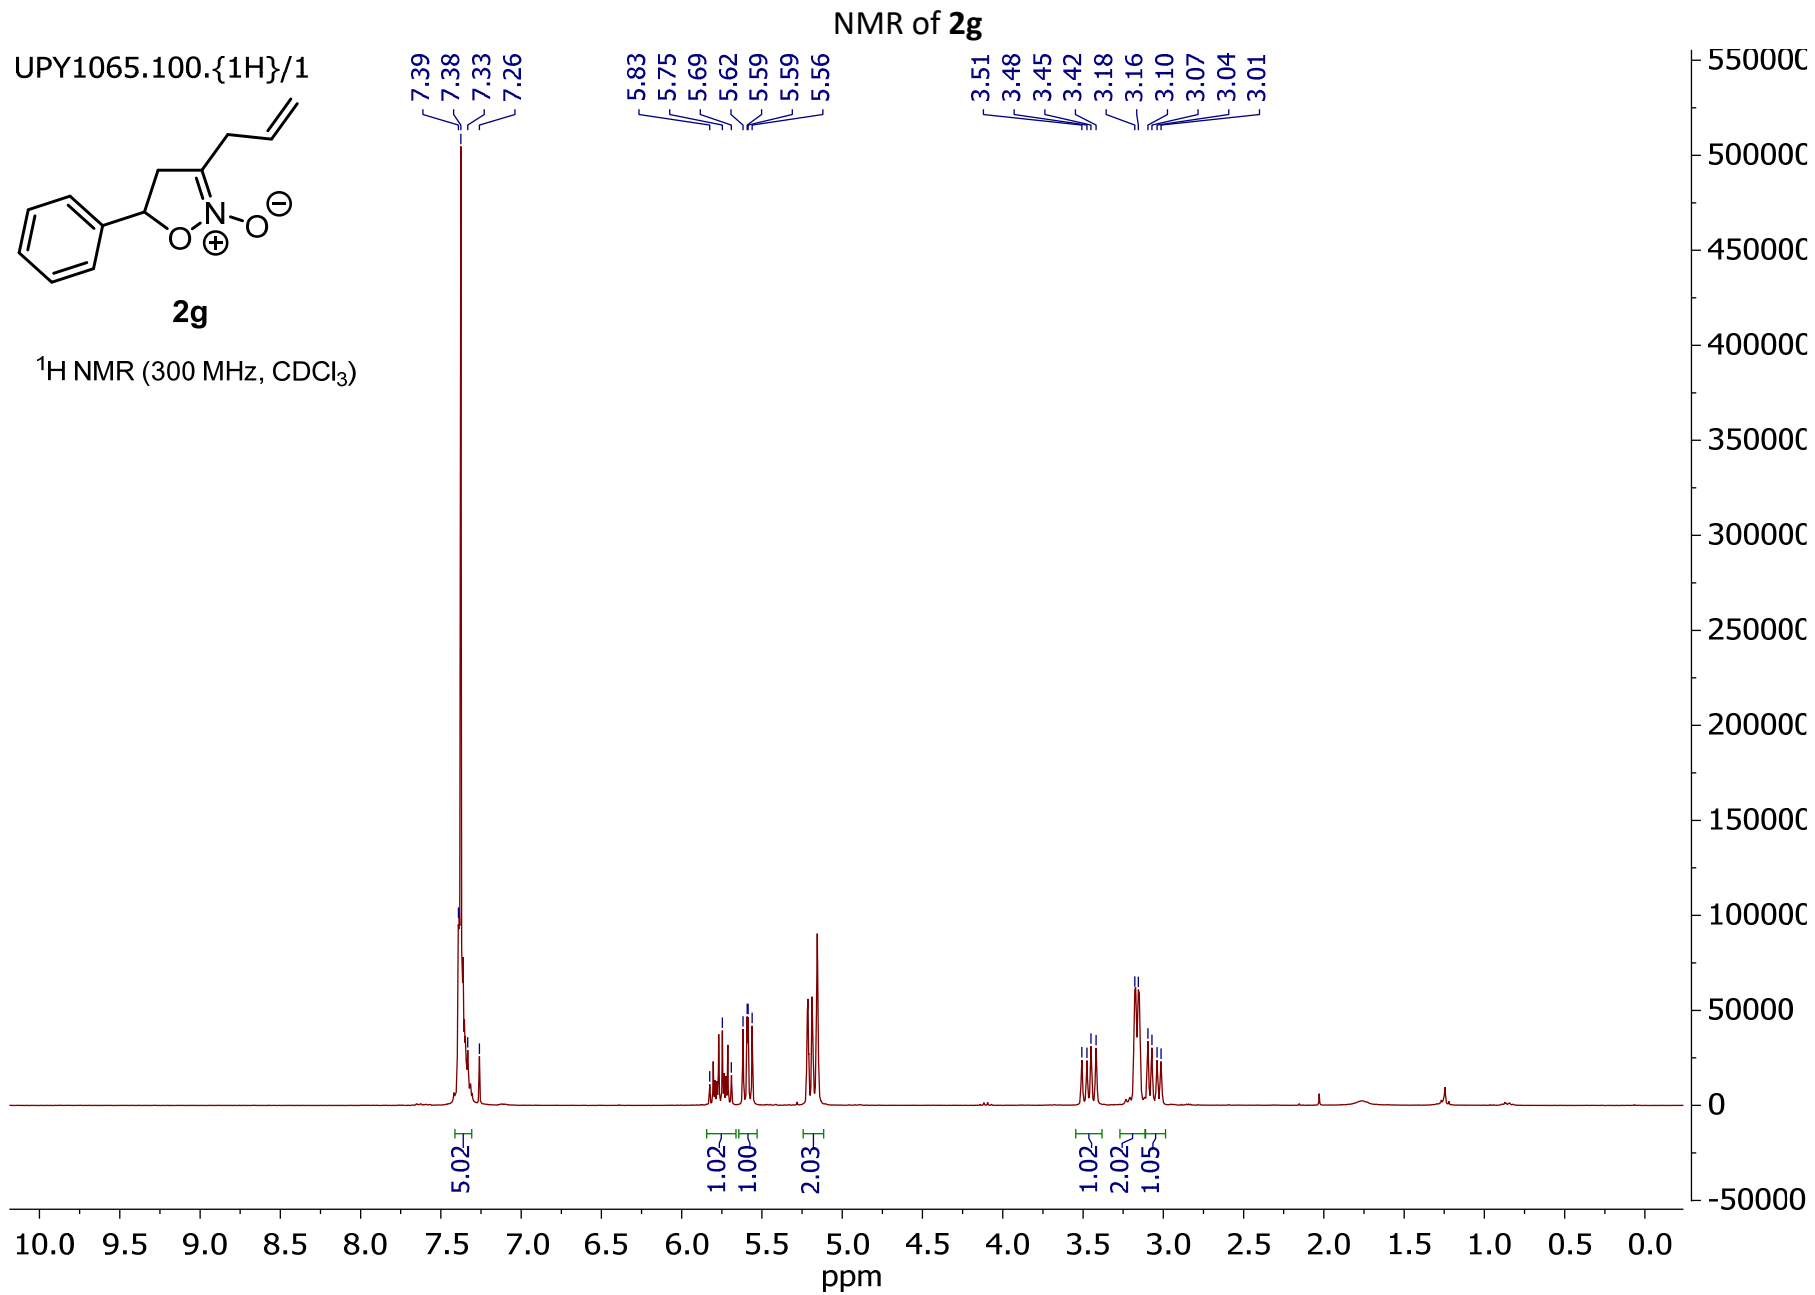

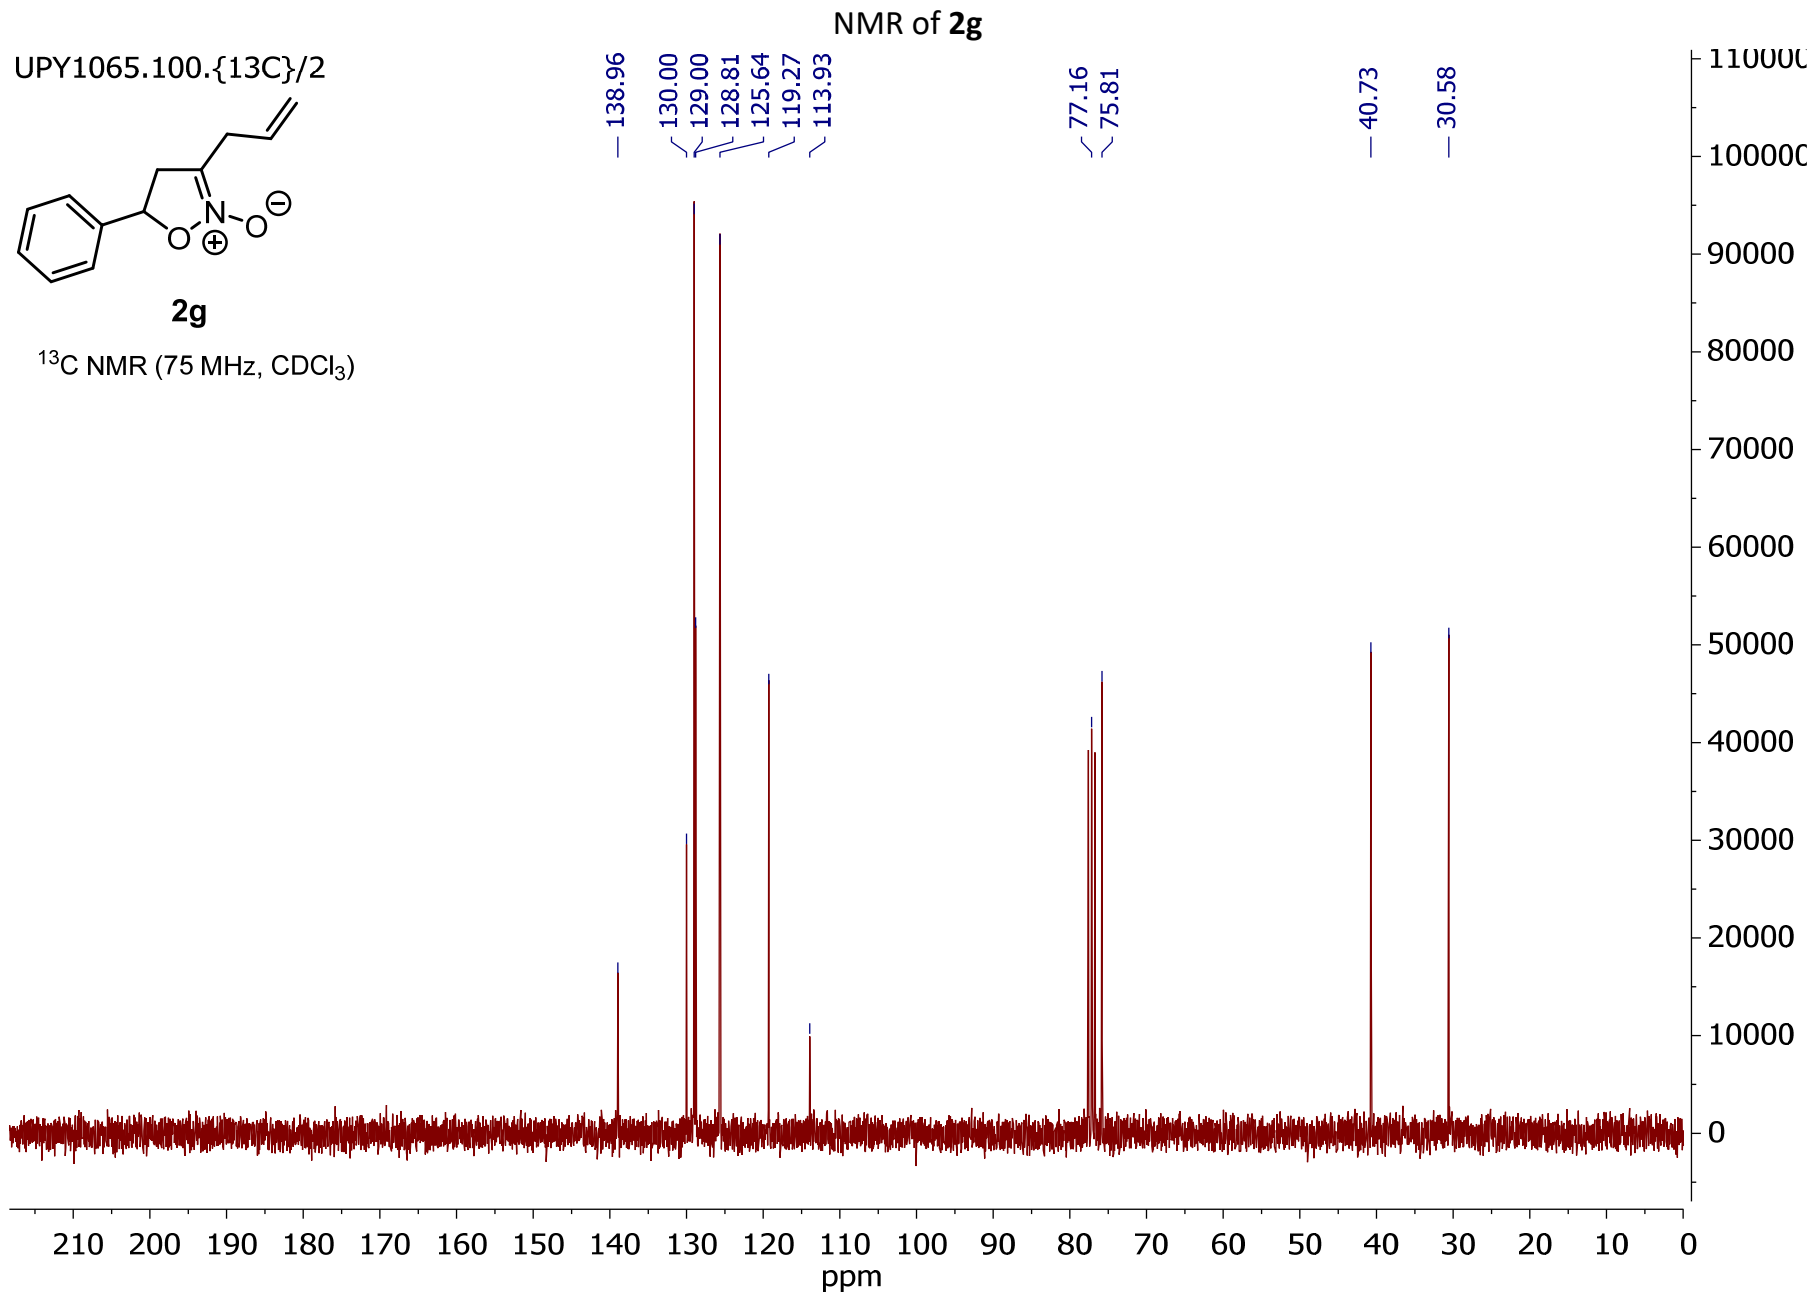



UPY1065.100.{13C}depts135/3

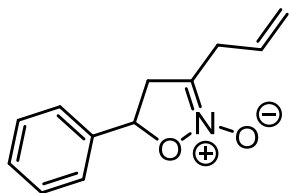

**2g**

<sup>13</sup>C DEPT NMR  
(75 MHz, CDCl<sub>3</sub>)

NMR of **2g**

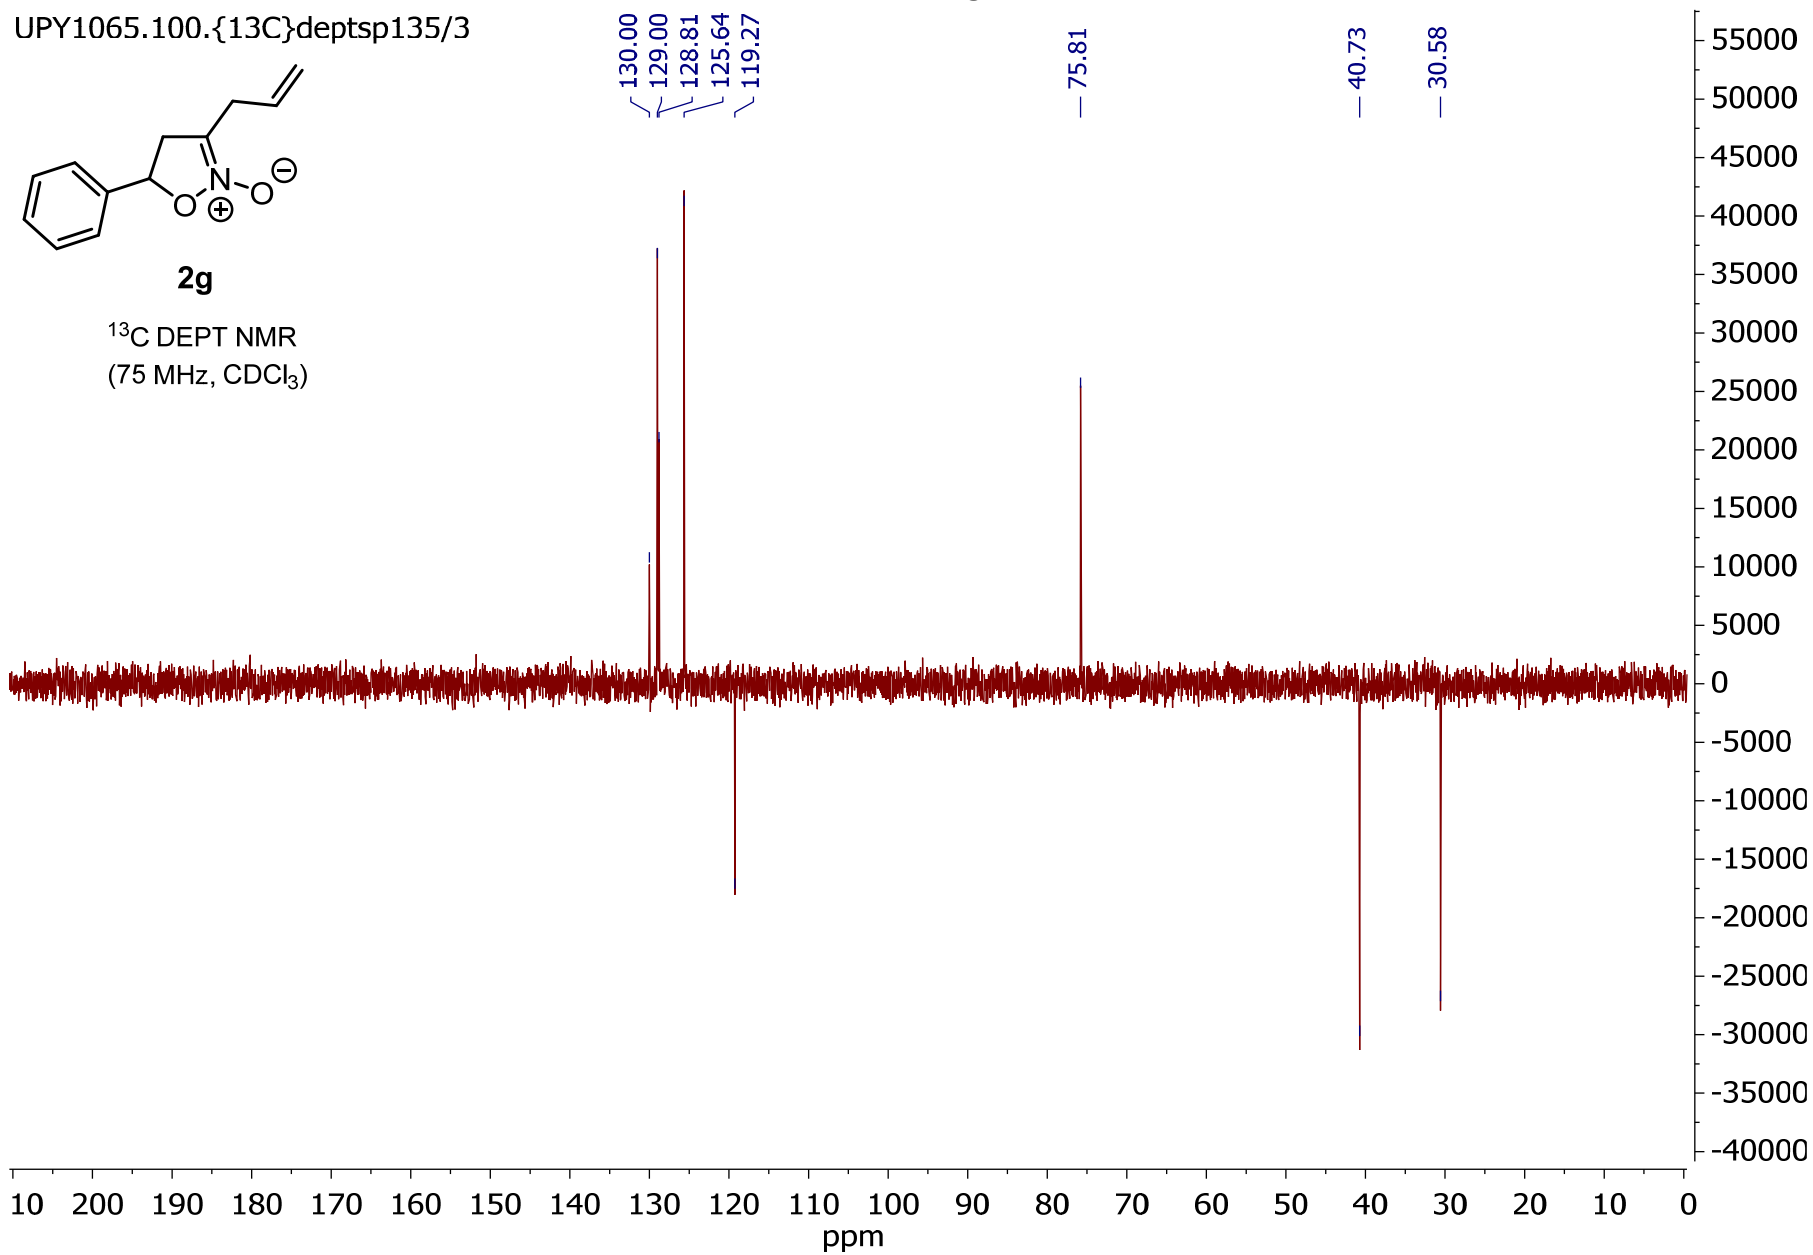

NMR of 2g

UPY1065.100.{1H-13C}HSQC/4

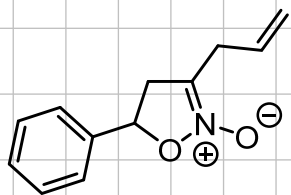

2g

$^1\text{H} - ^{13}\text{C}$  HSQC NMR  
( $\text{CDCl}_3$ )

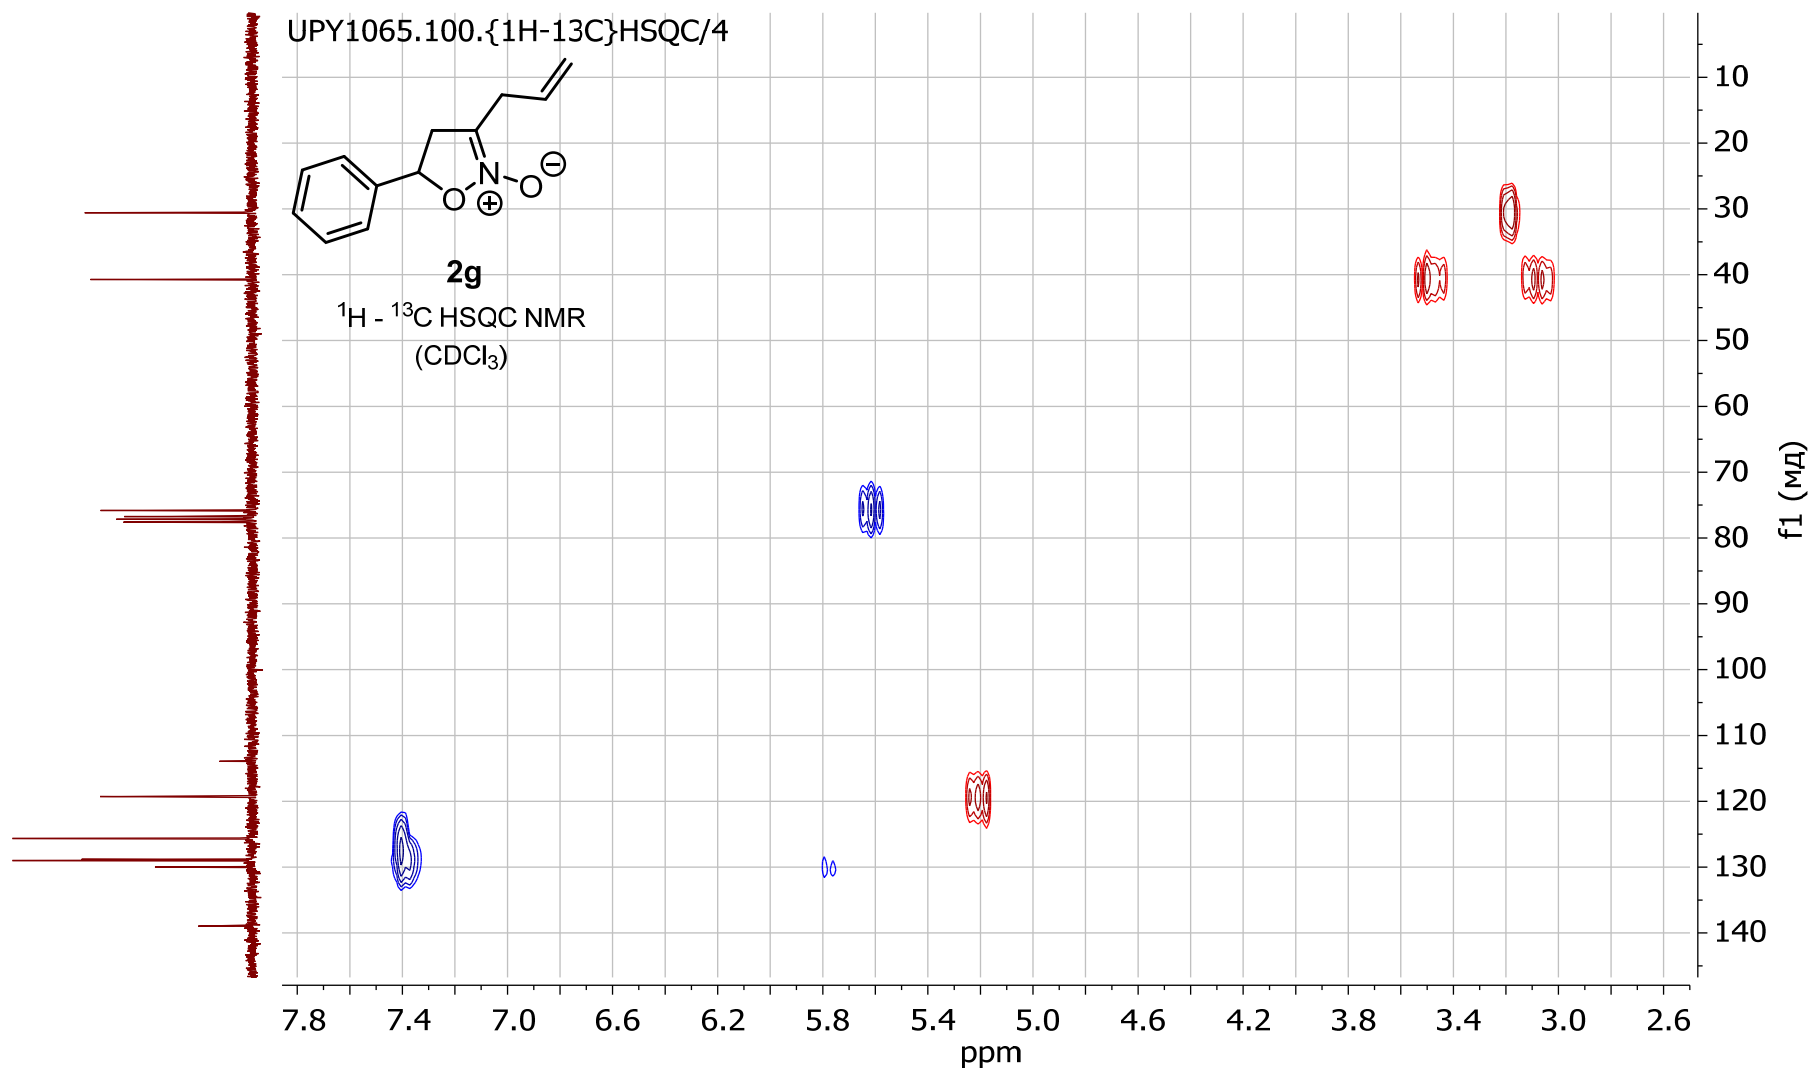

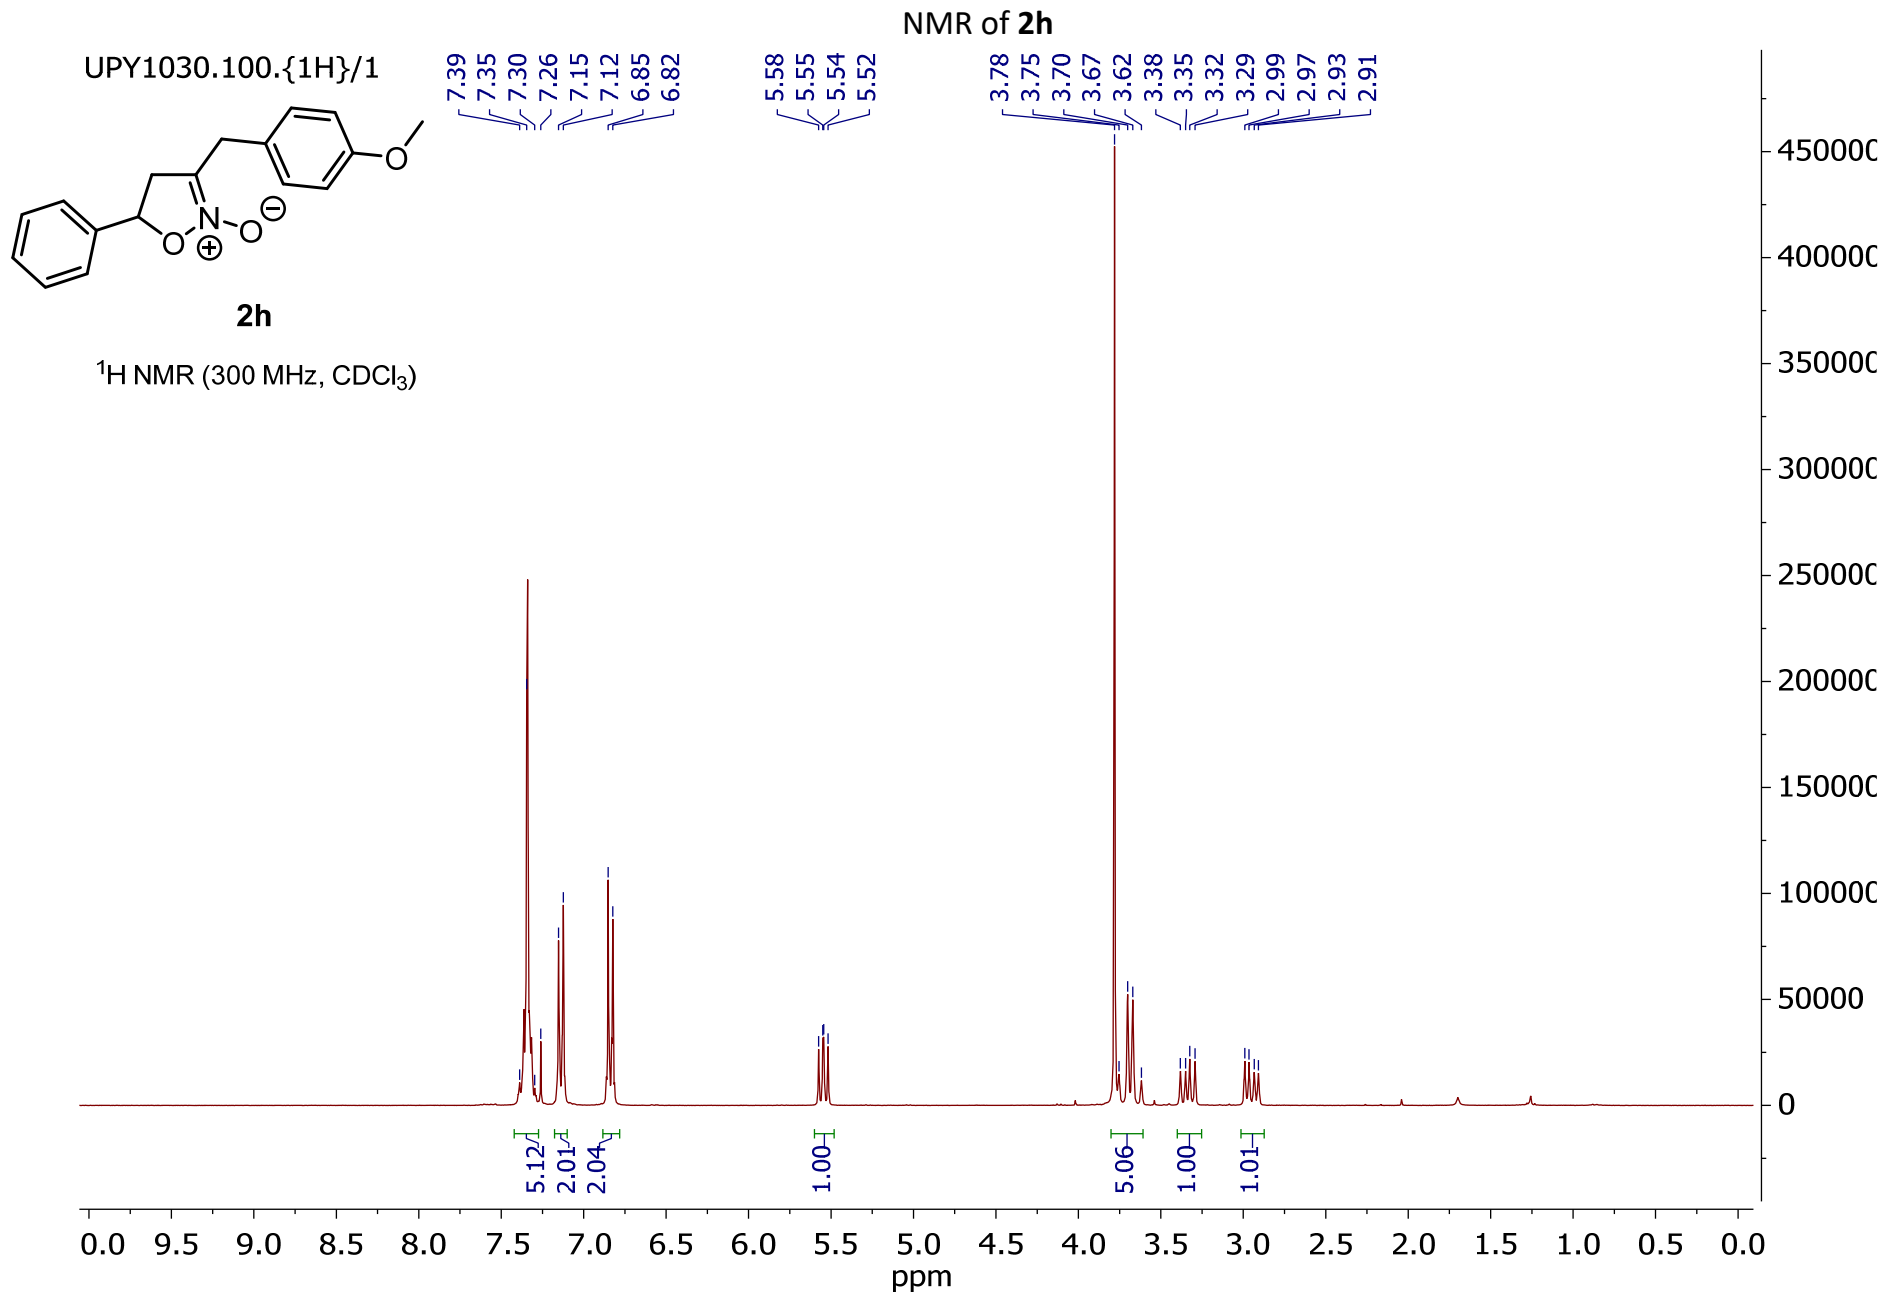

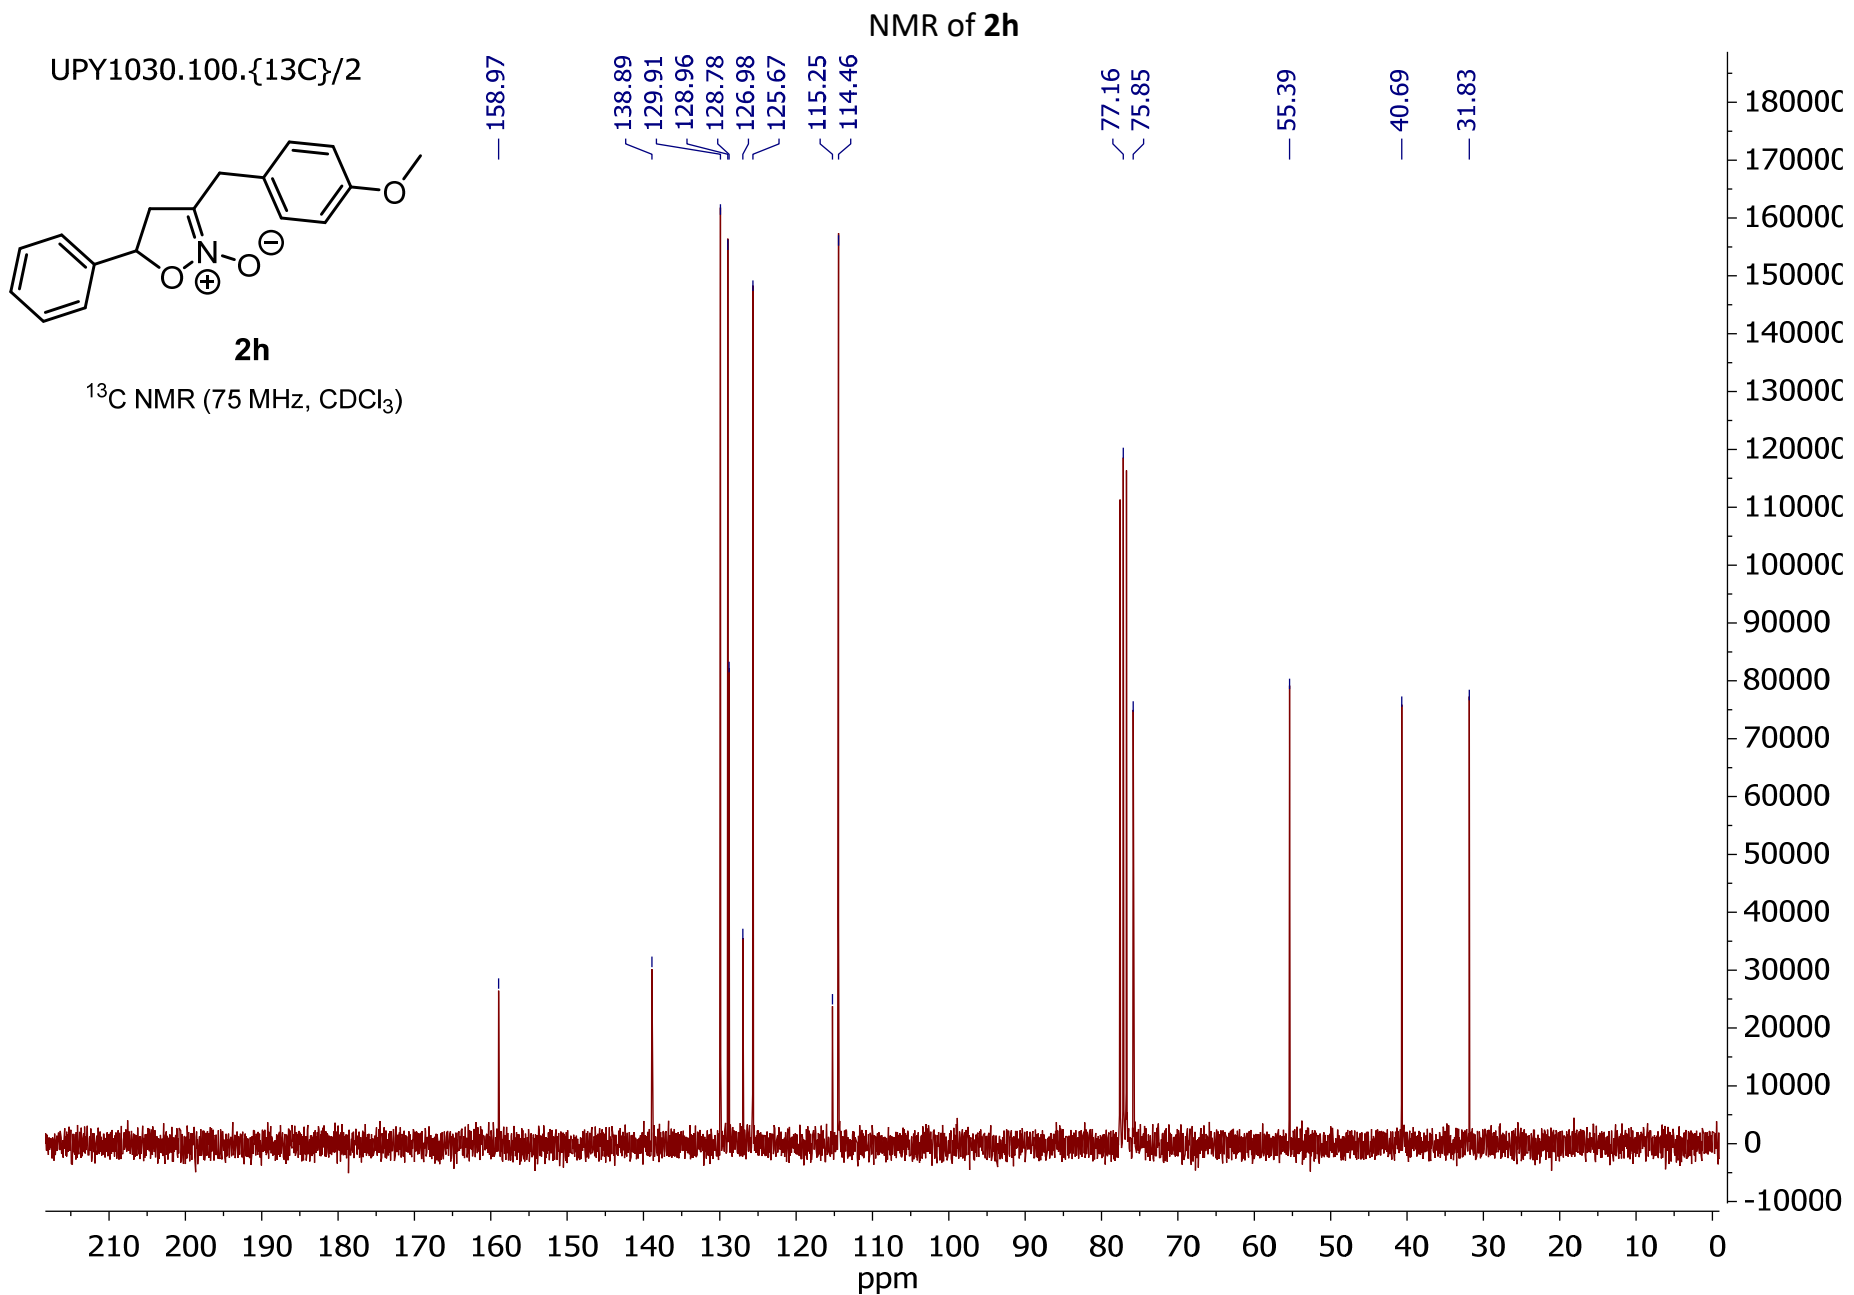

UPY1030.100.{13C}depts135/3

### NMR of 2h

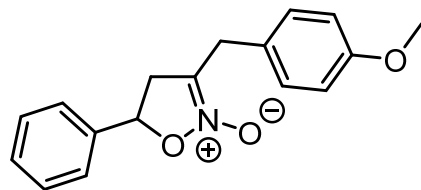

**2h**

<sup>13</sup>C DEPT NMR  
(75 MHz, CDCl<sub>3</sub>)

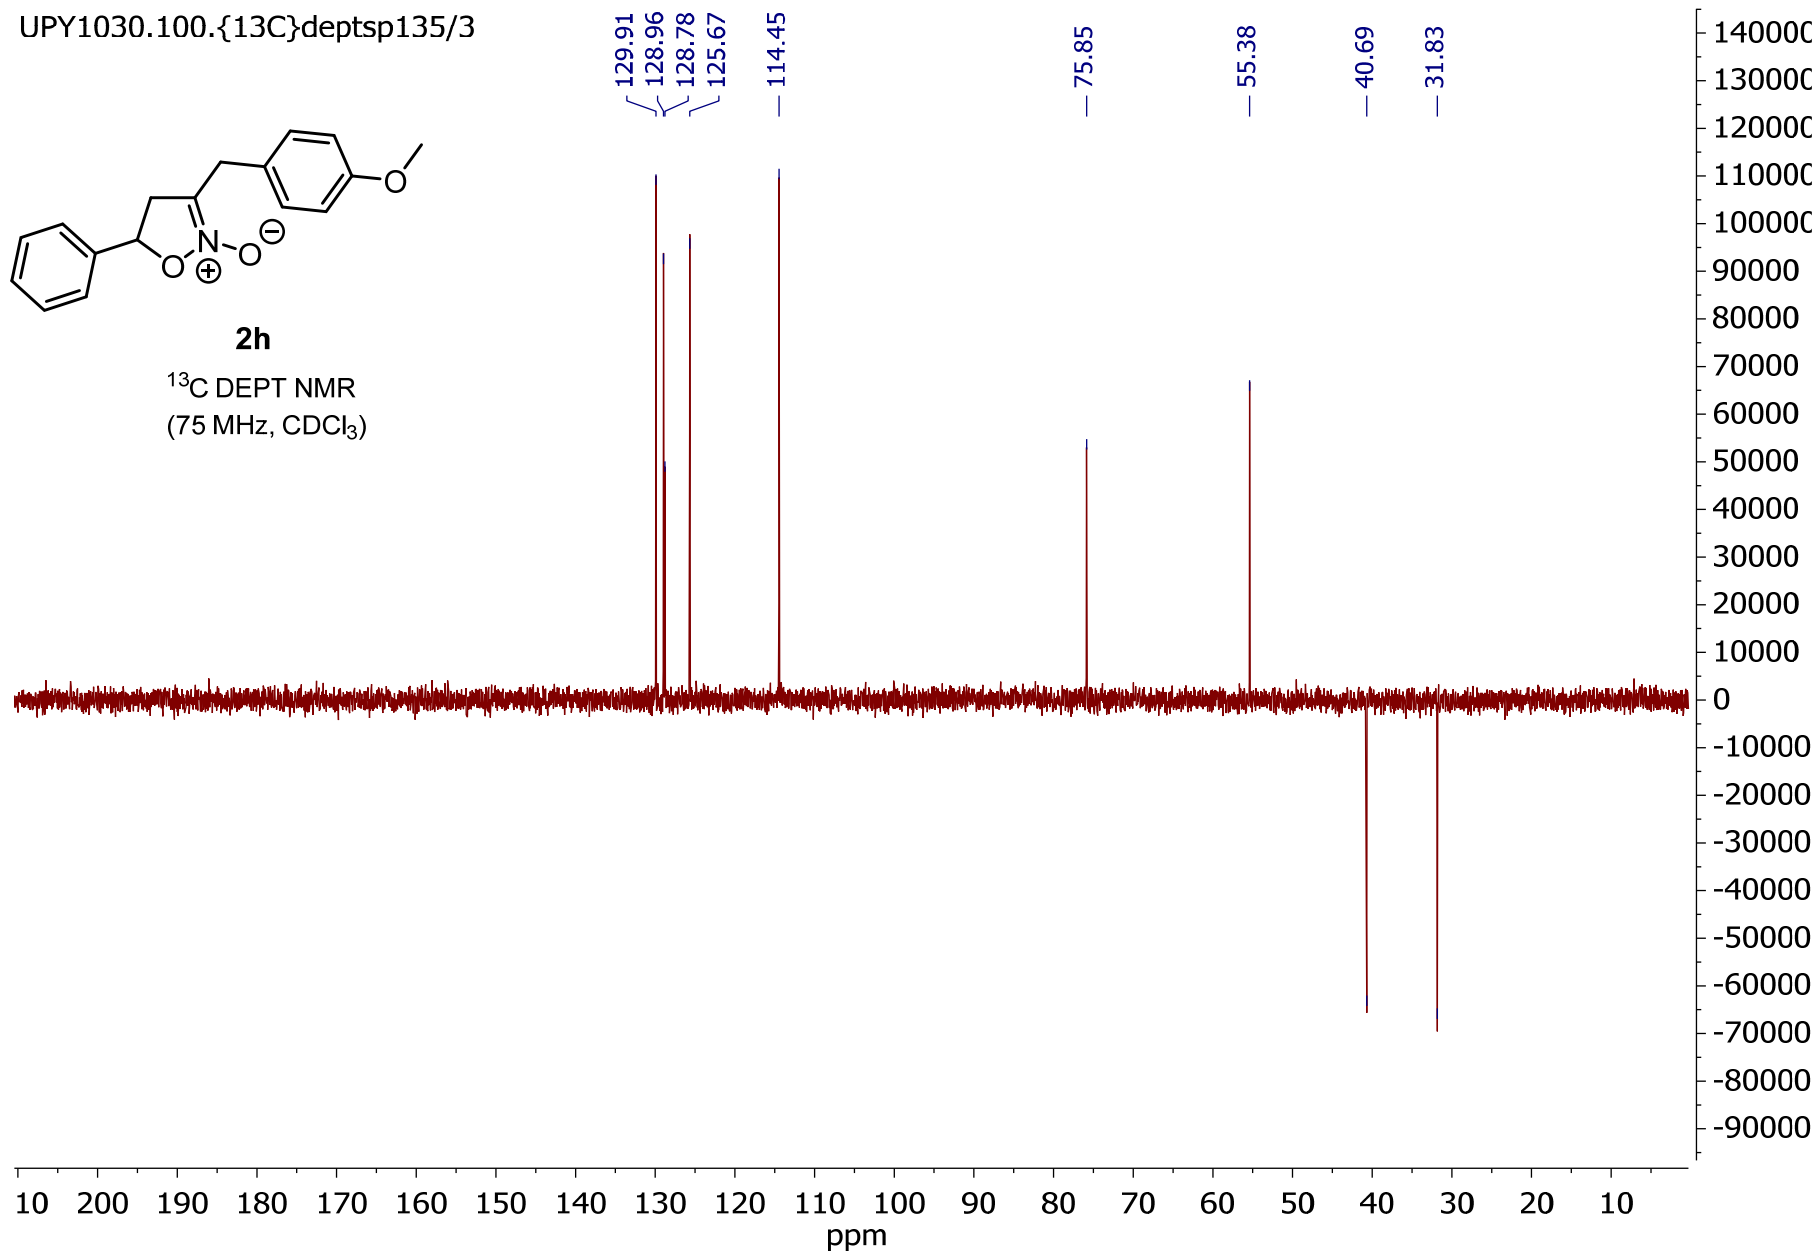

NMR of 2h

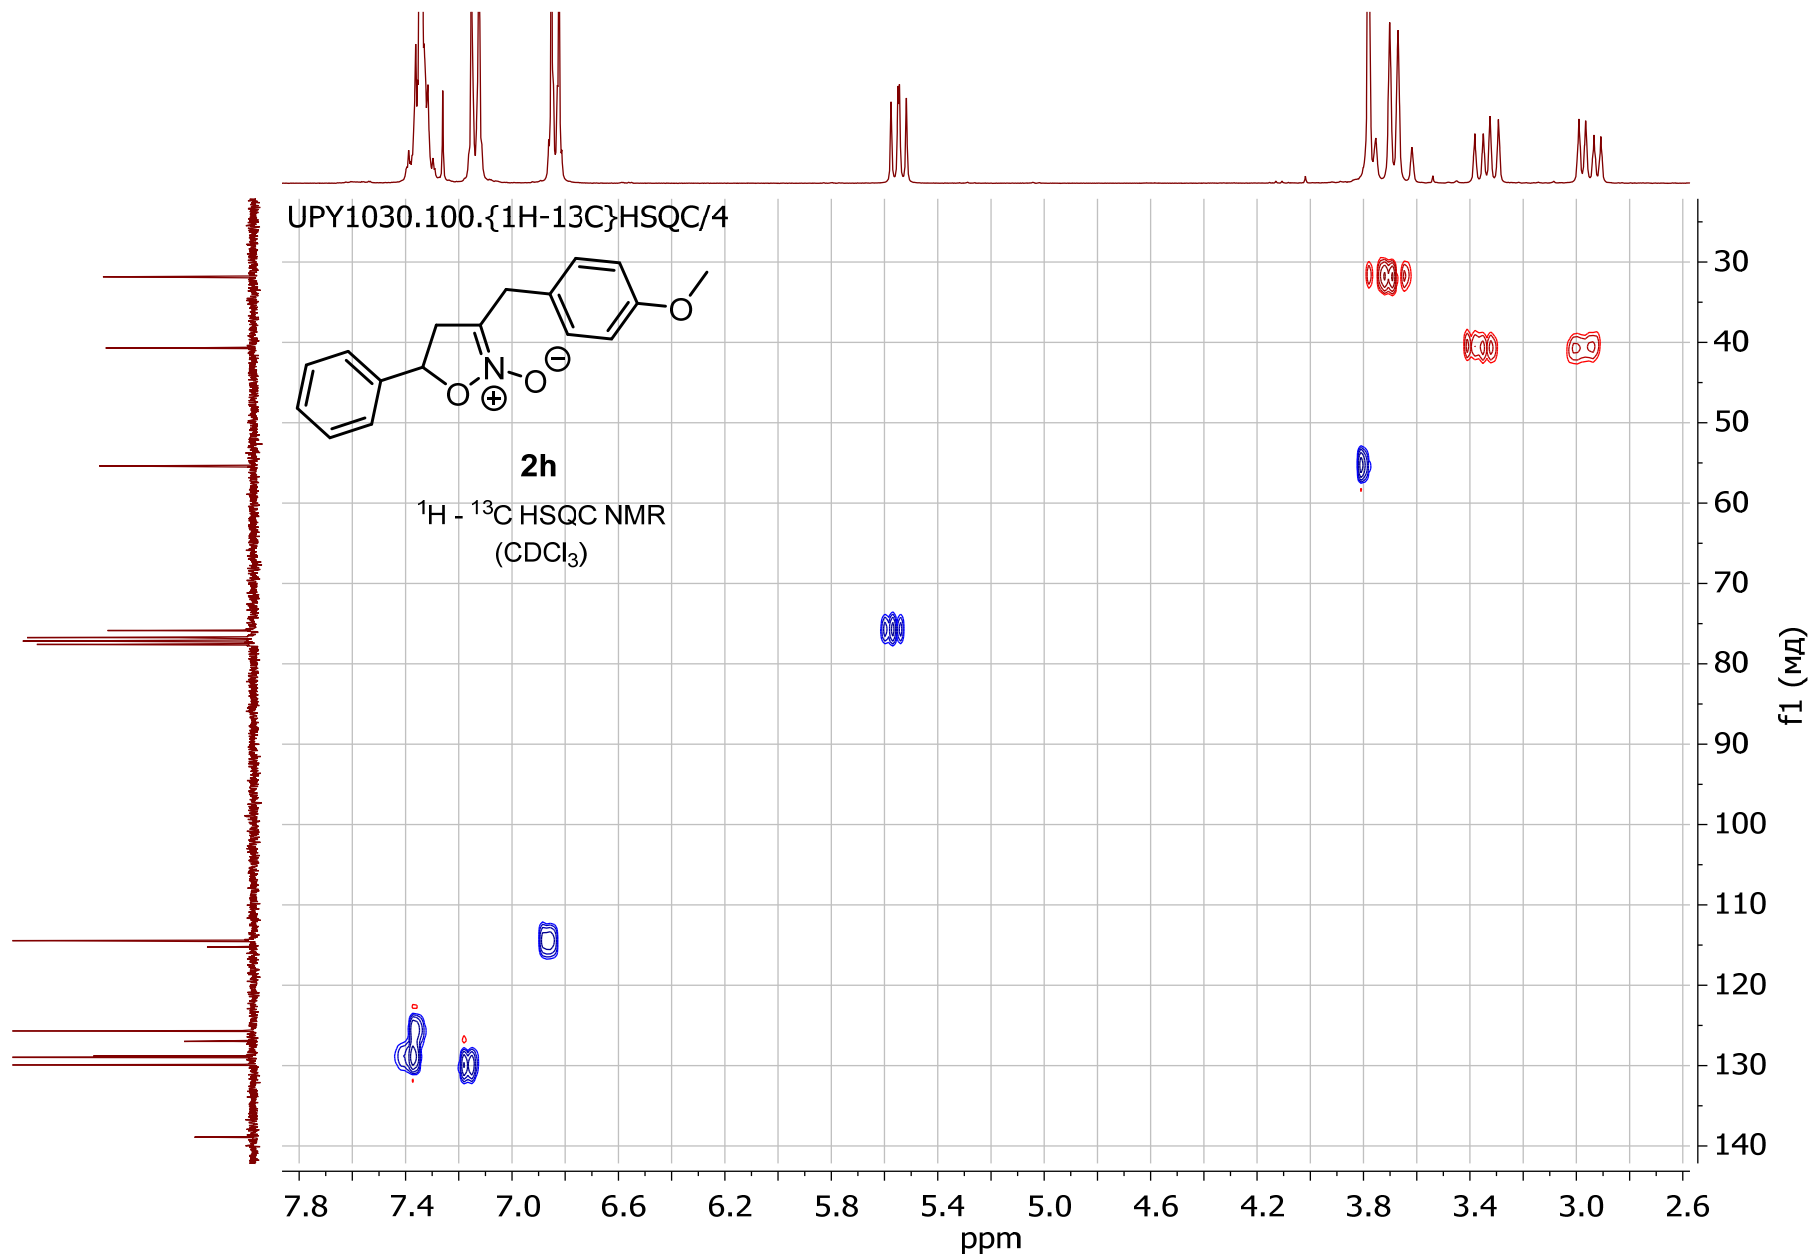

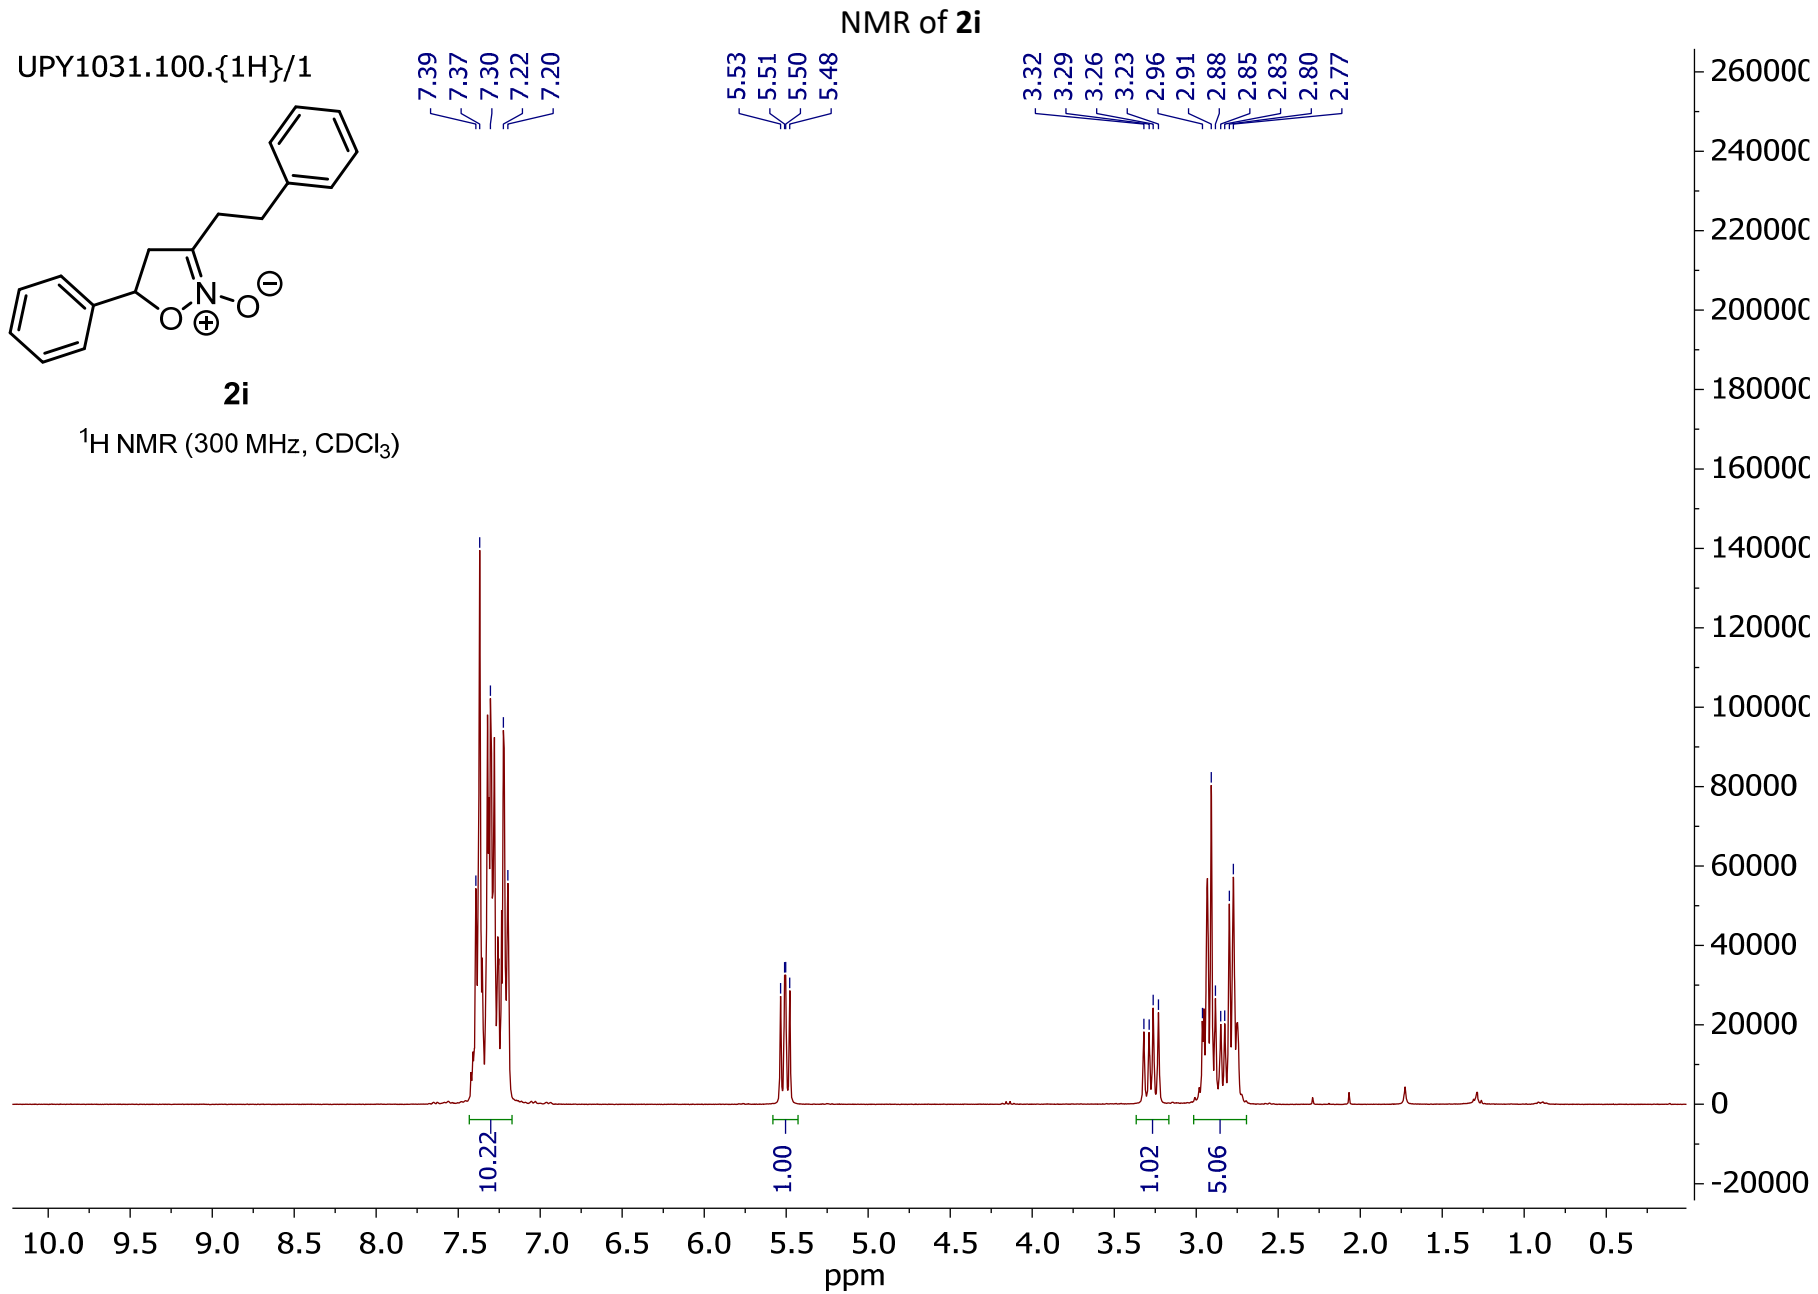

UPY1031.100.{13C}/2

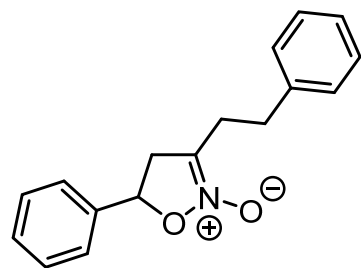

**2i**

<sup>13</sup>C NMR (75 MHz, CDCl<sub>3</sub>)

NMR of **2i**

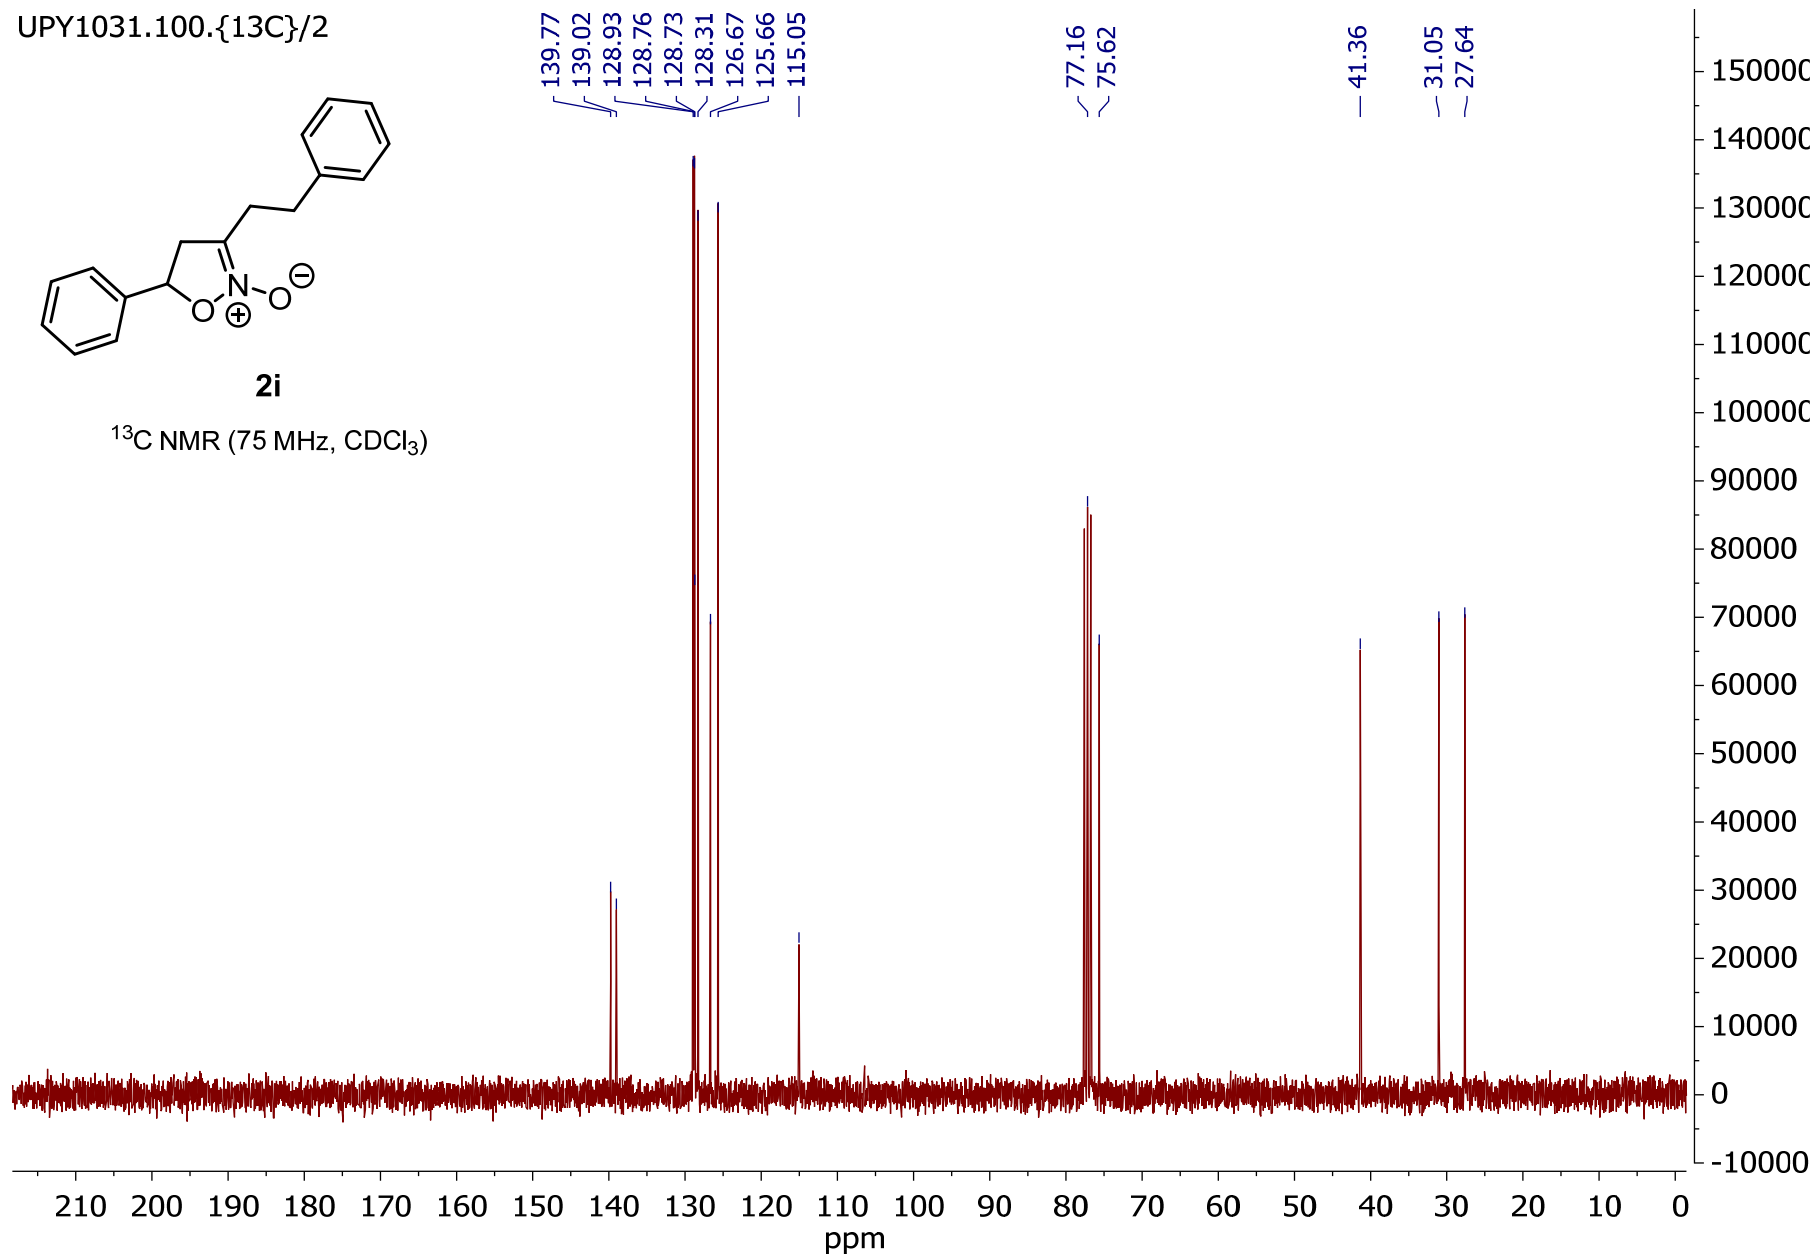



UPY1031.100.{13C}depts135/3

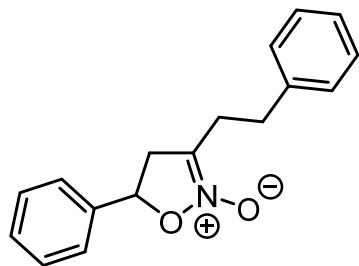

**2i**

<sup>13</sup>C DEPT NMR  
(75 MHz, CDCl<sub>3</sub>)

NMR of **2i**

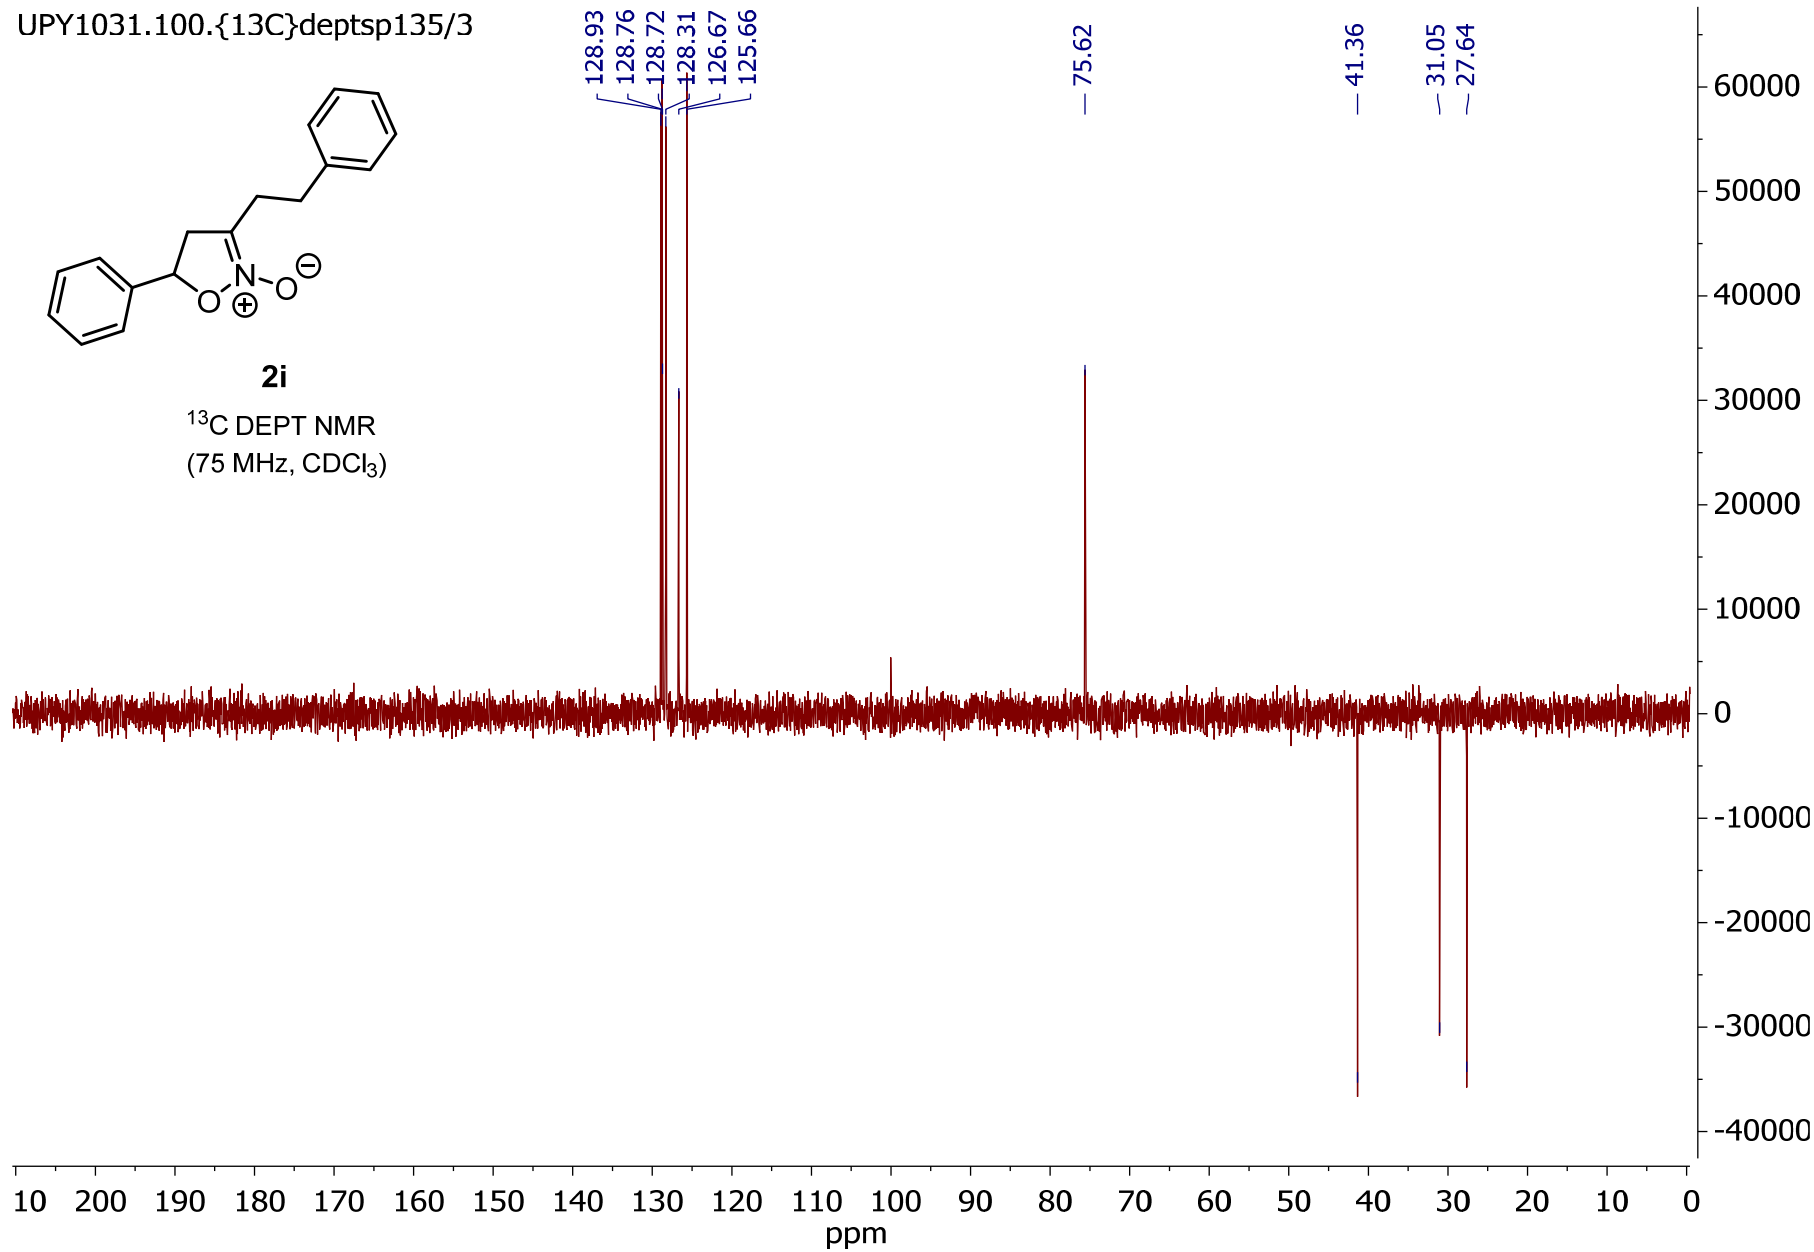

NMR of 2i

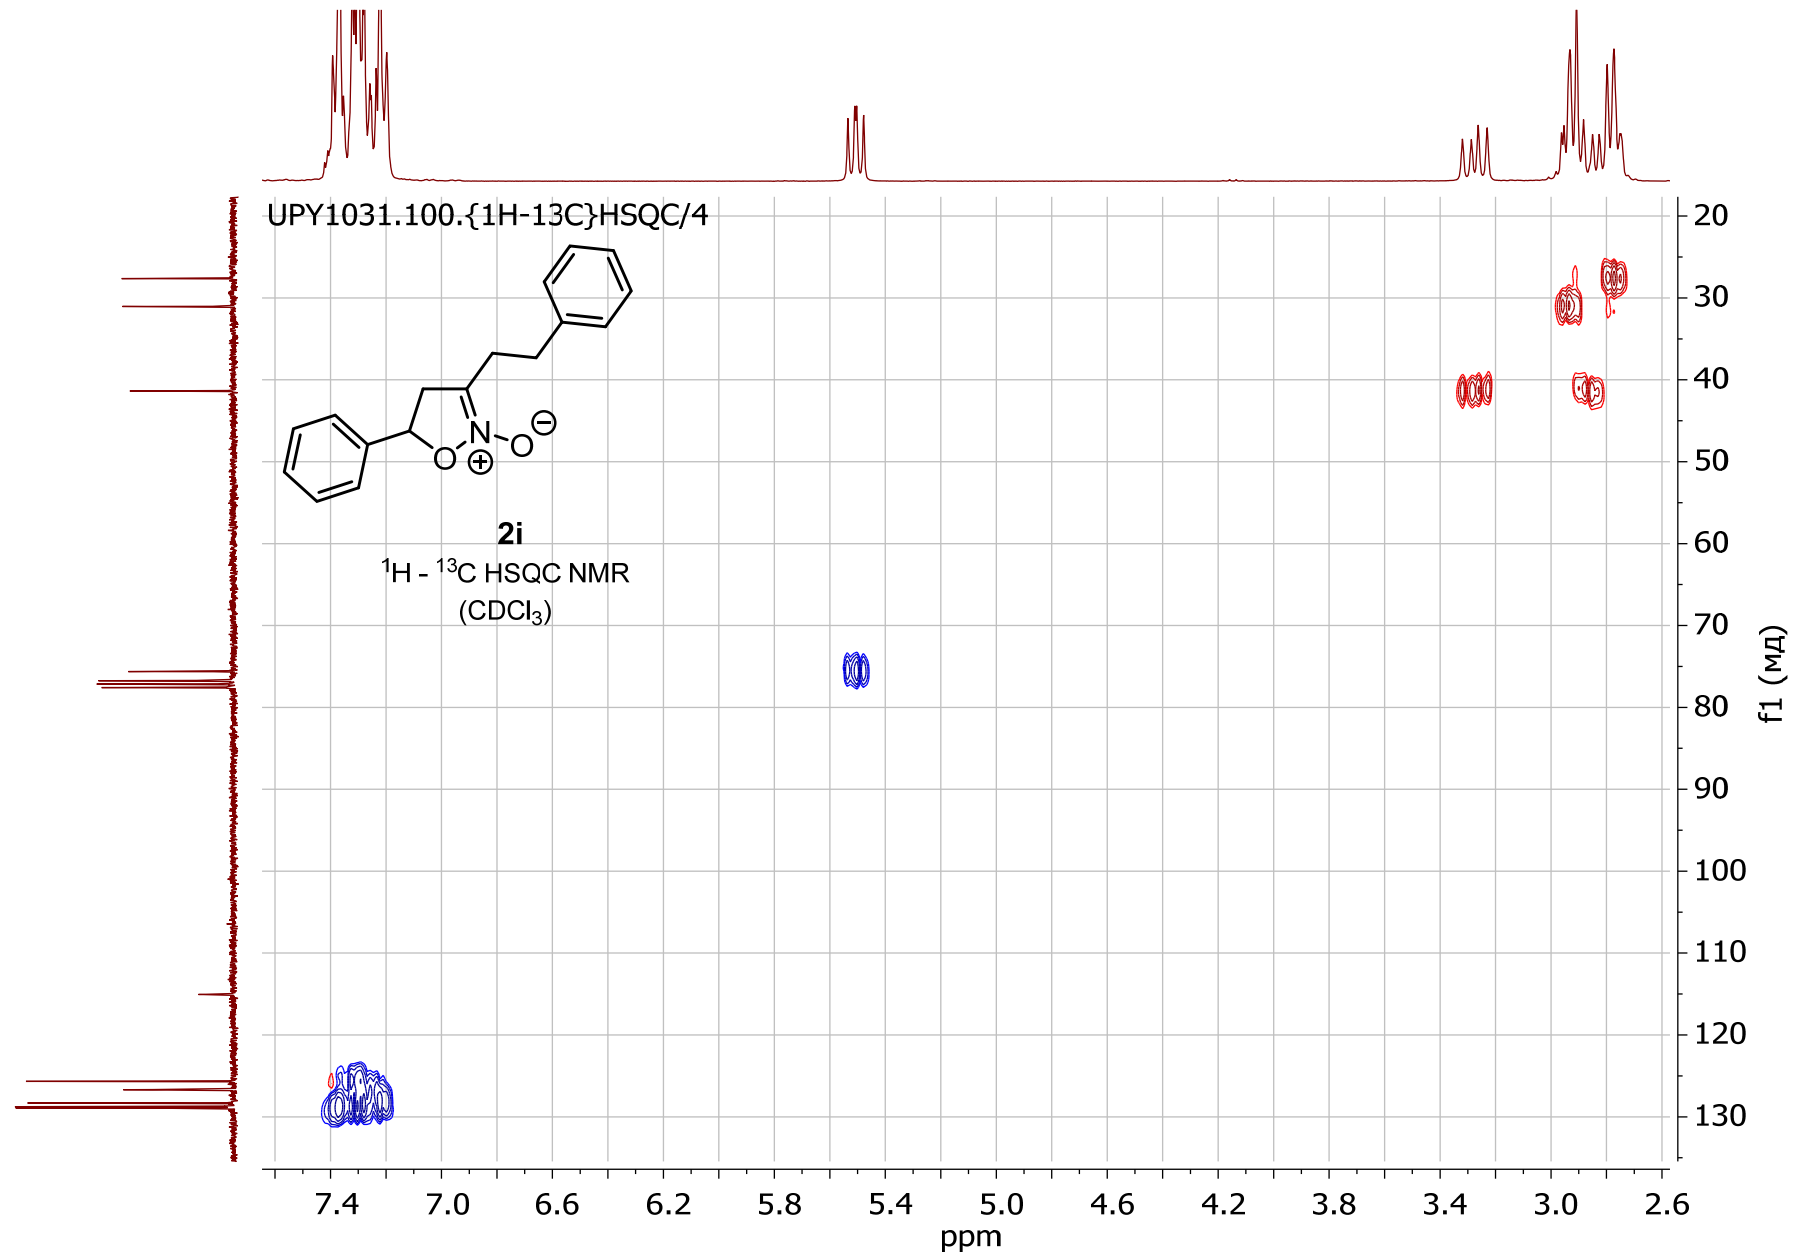

# FTIR (ATR) of 2i

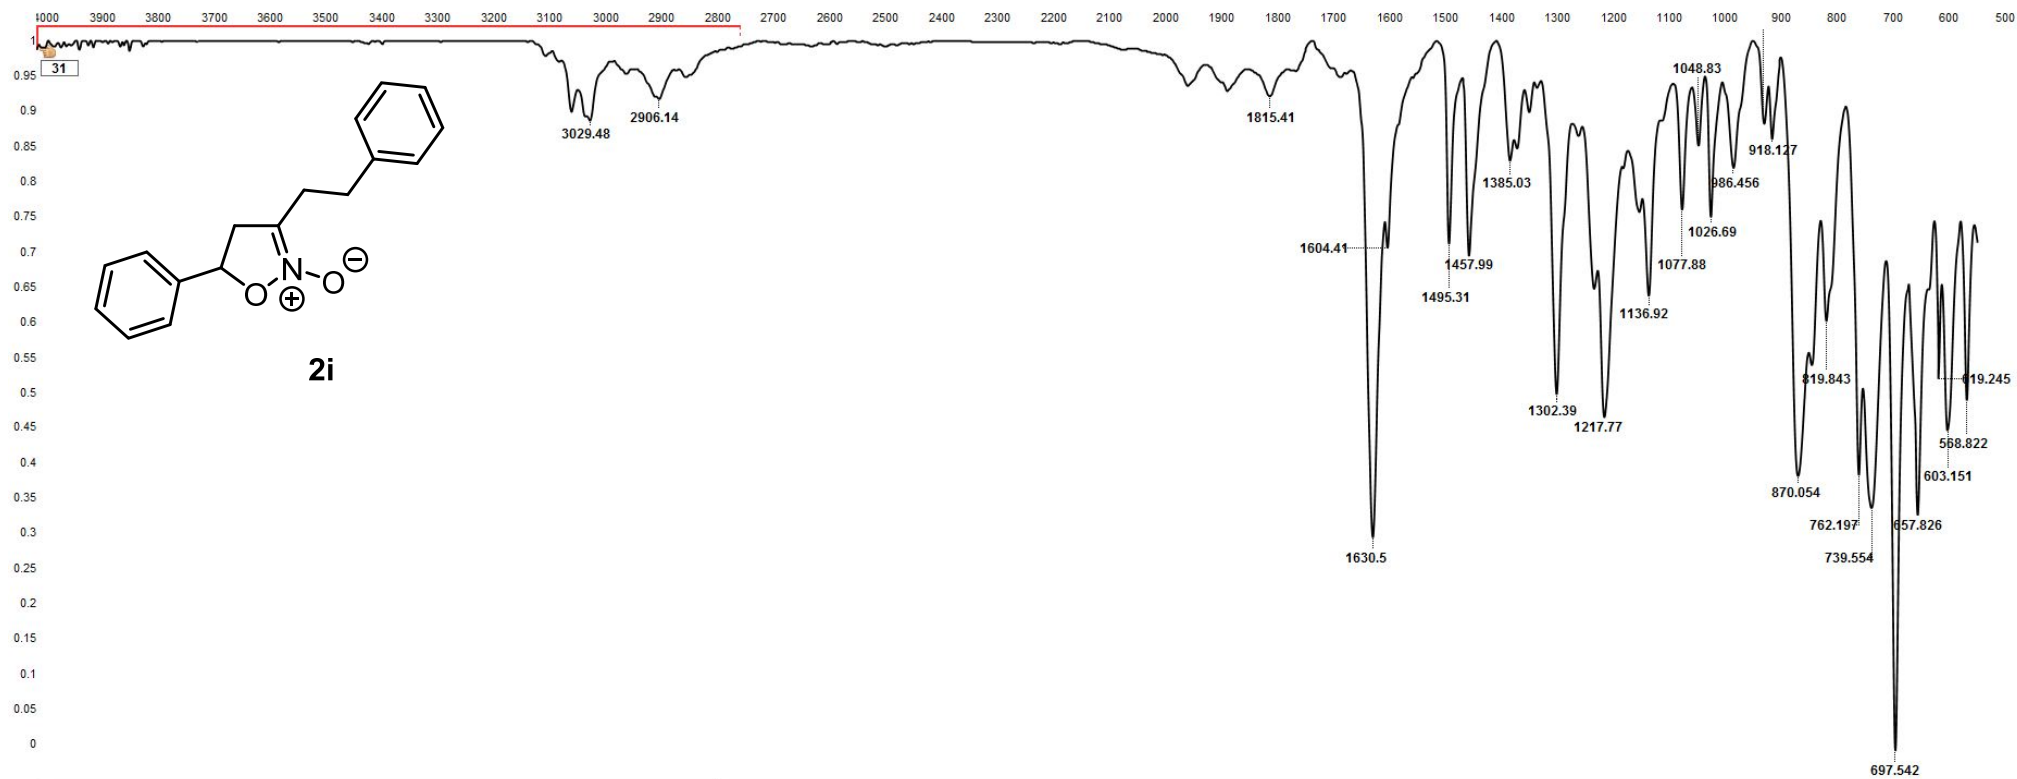

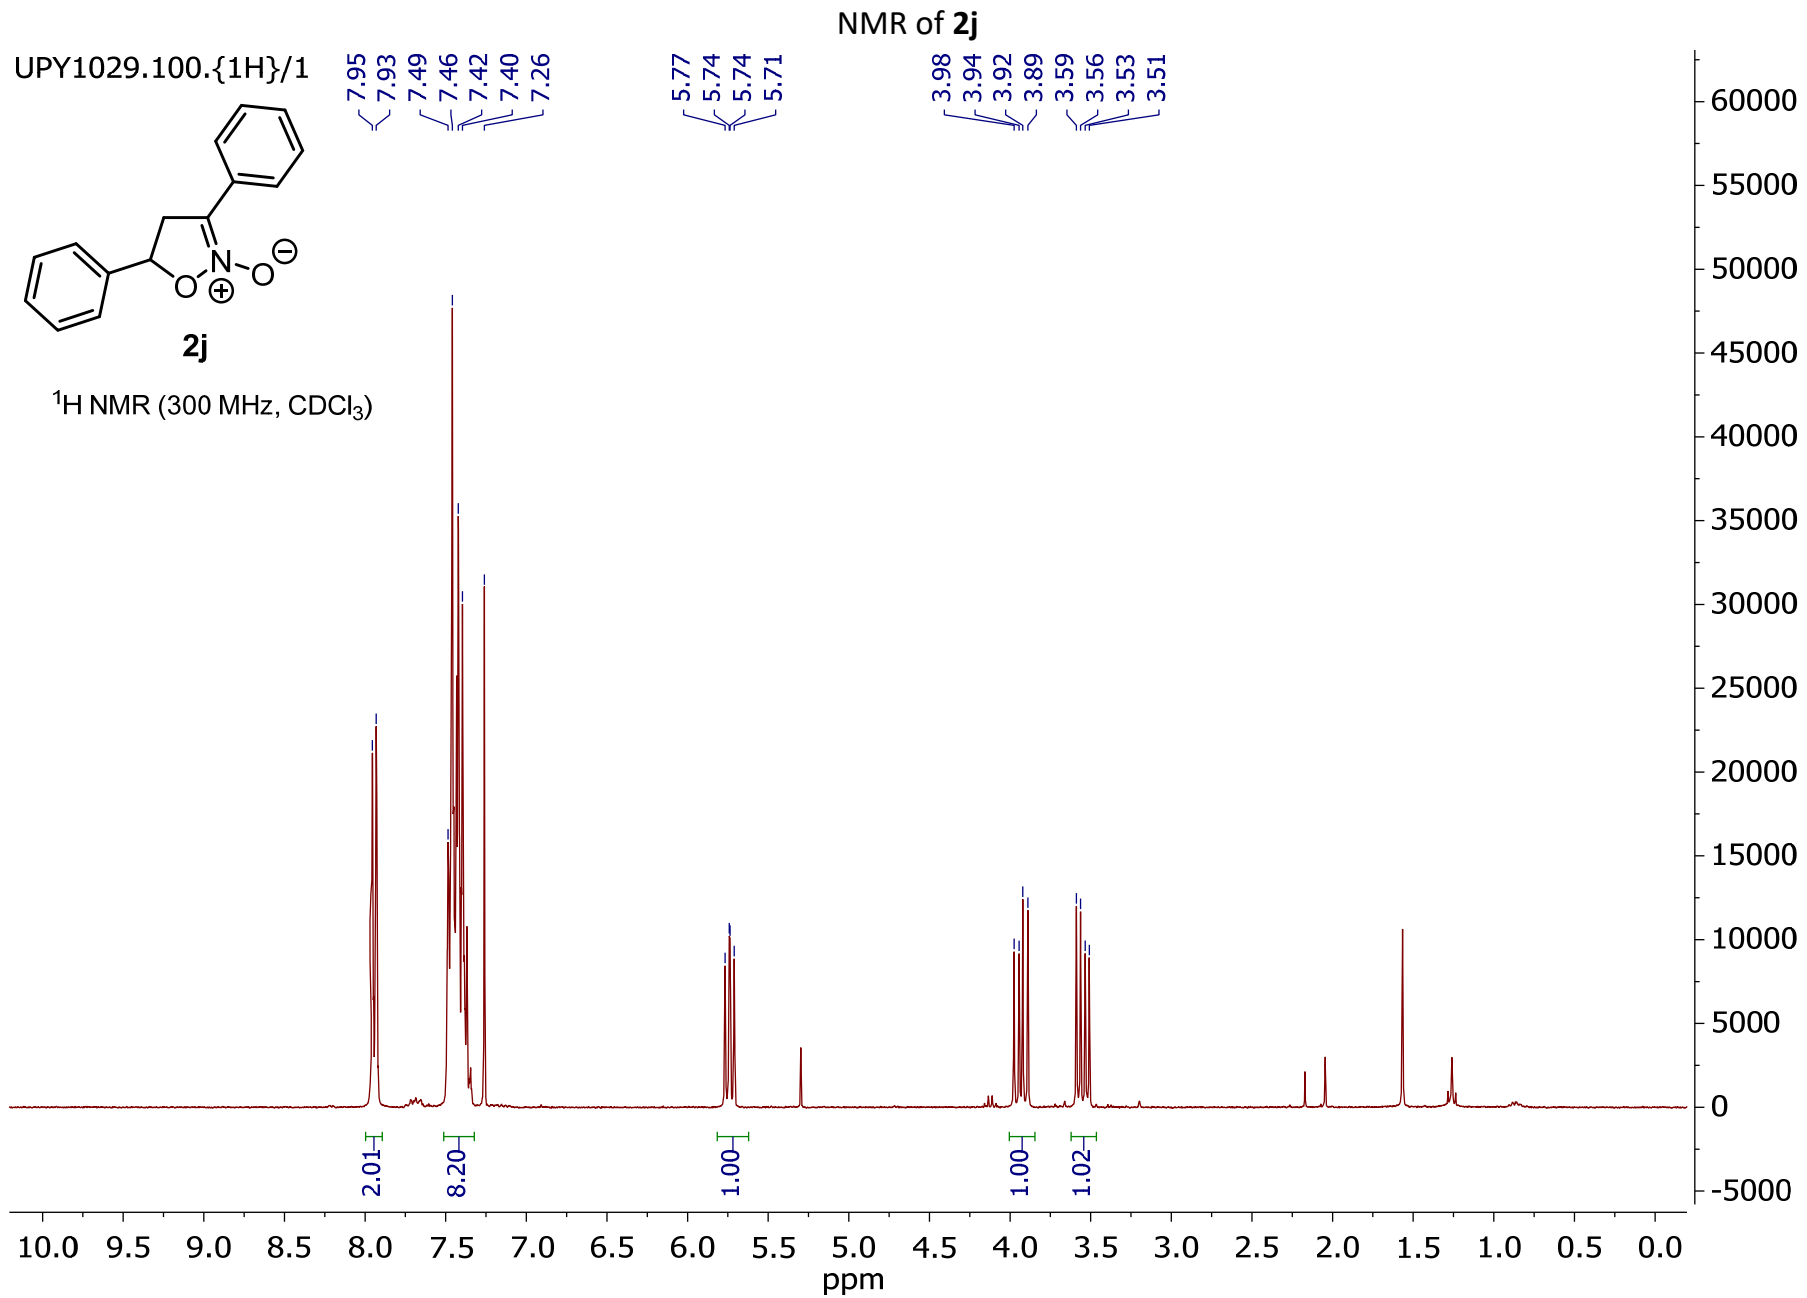

NMR of **2k**

UPY1044.100.{1H}/1

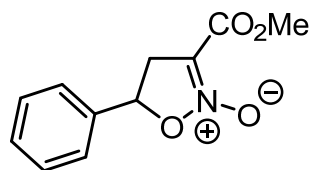

**2k**

<sup>1</sup>H NMR (300 MHz, CDCl<sub>3</sub>)

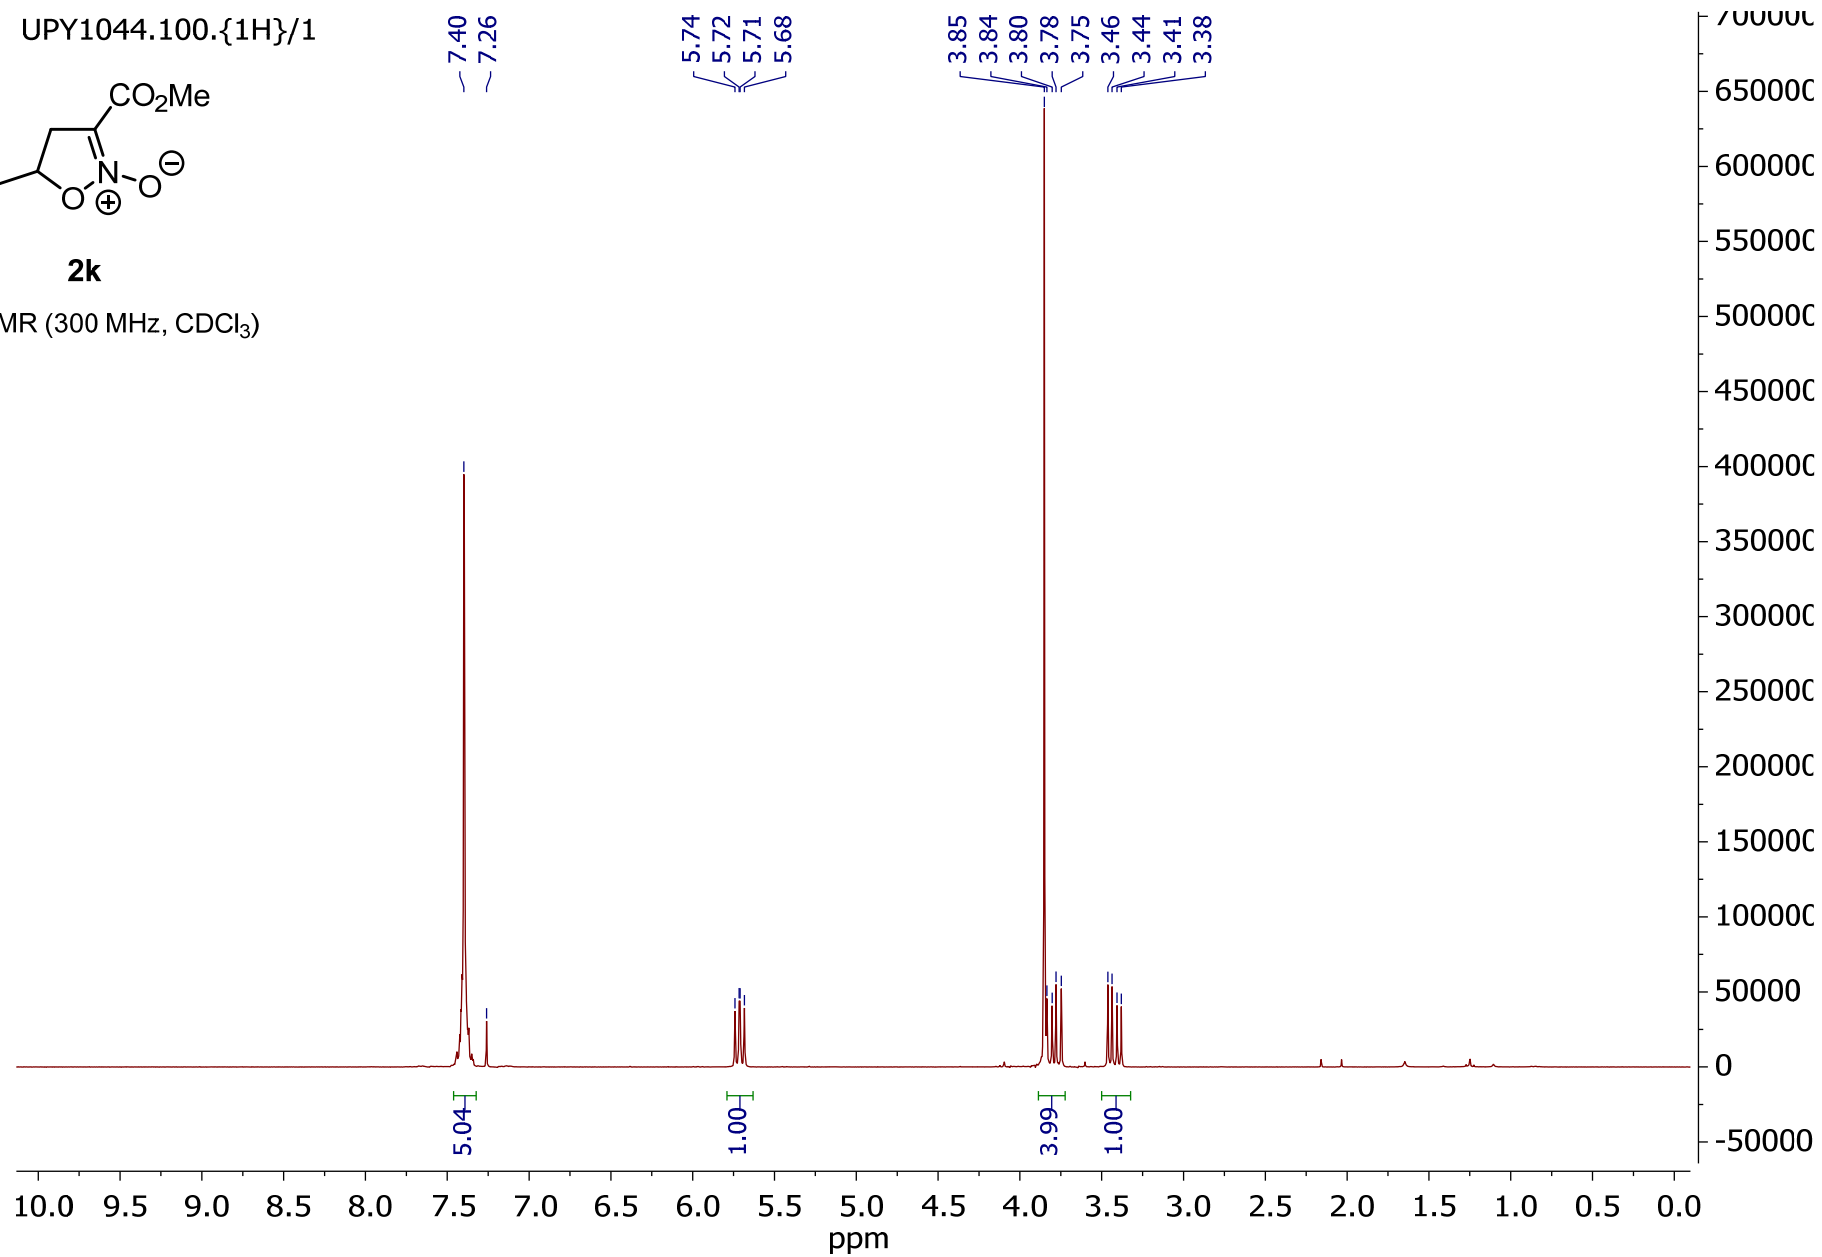

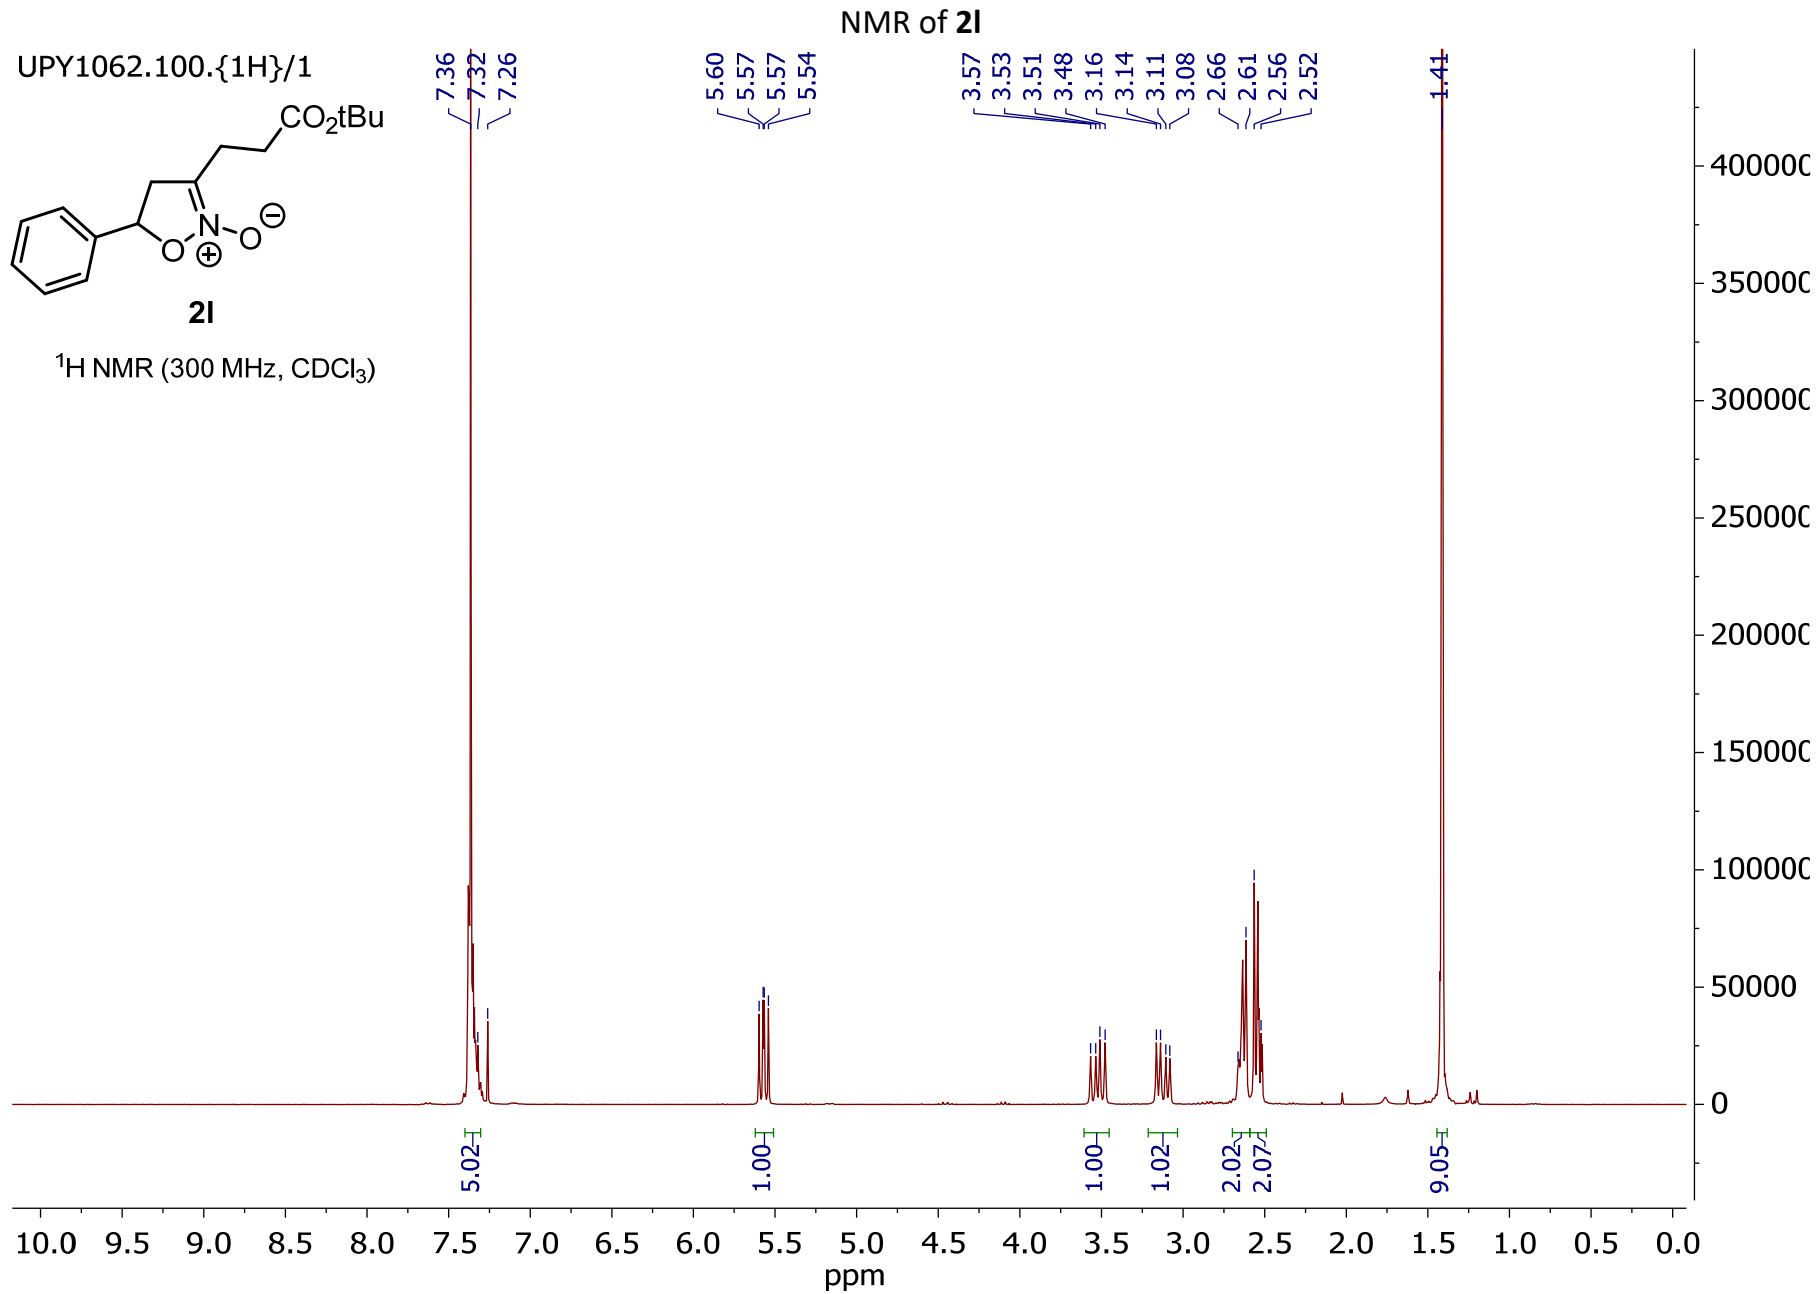

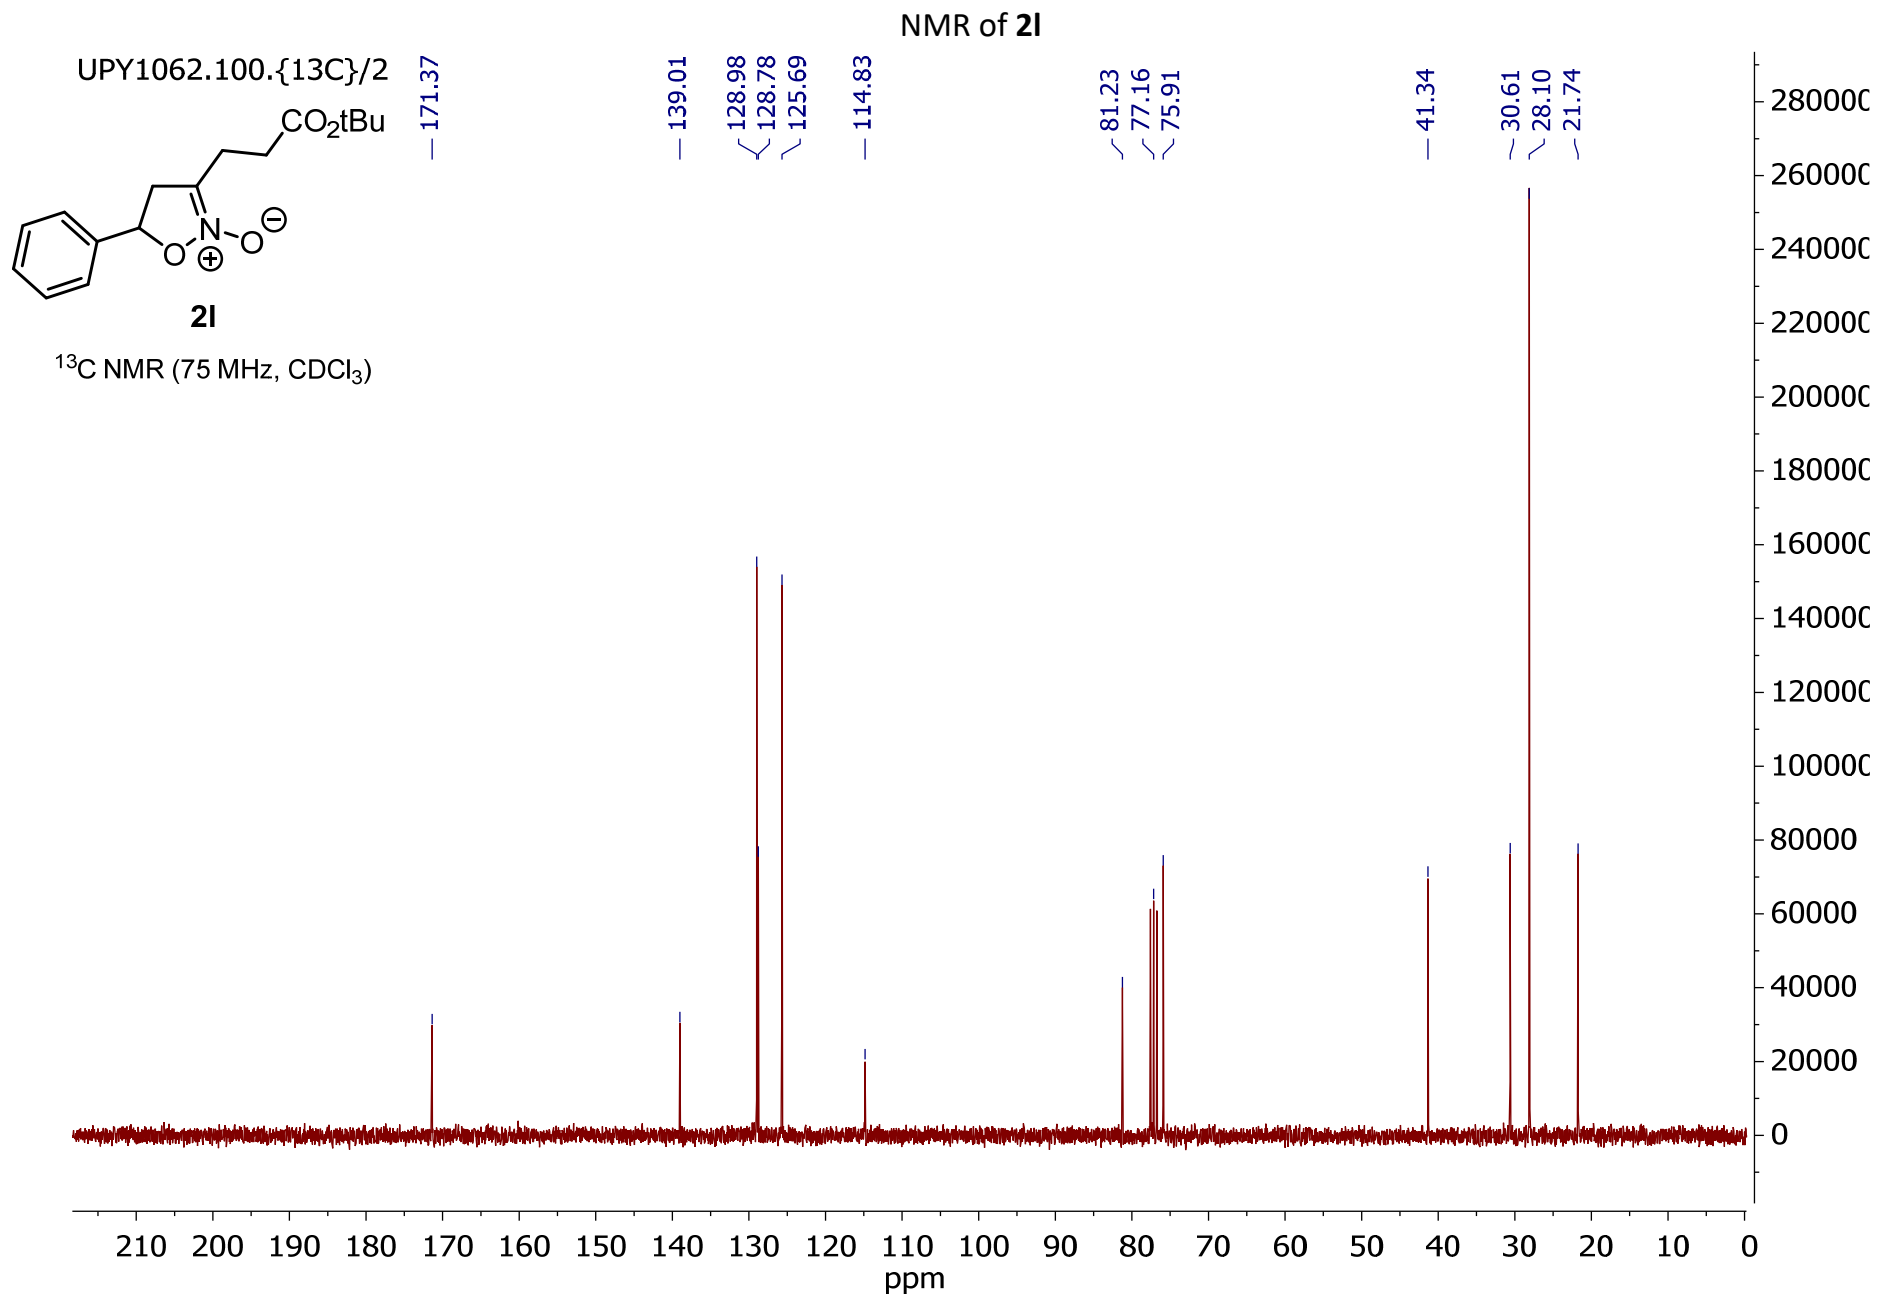

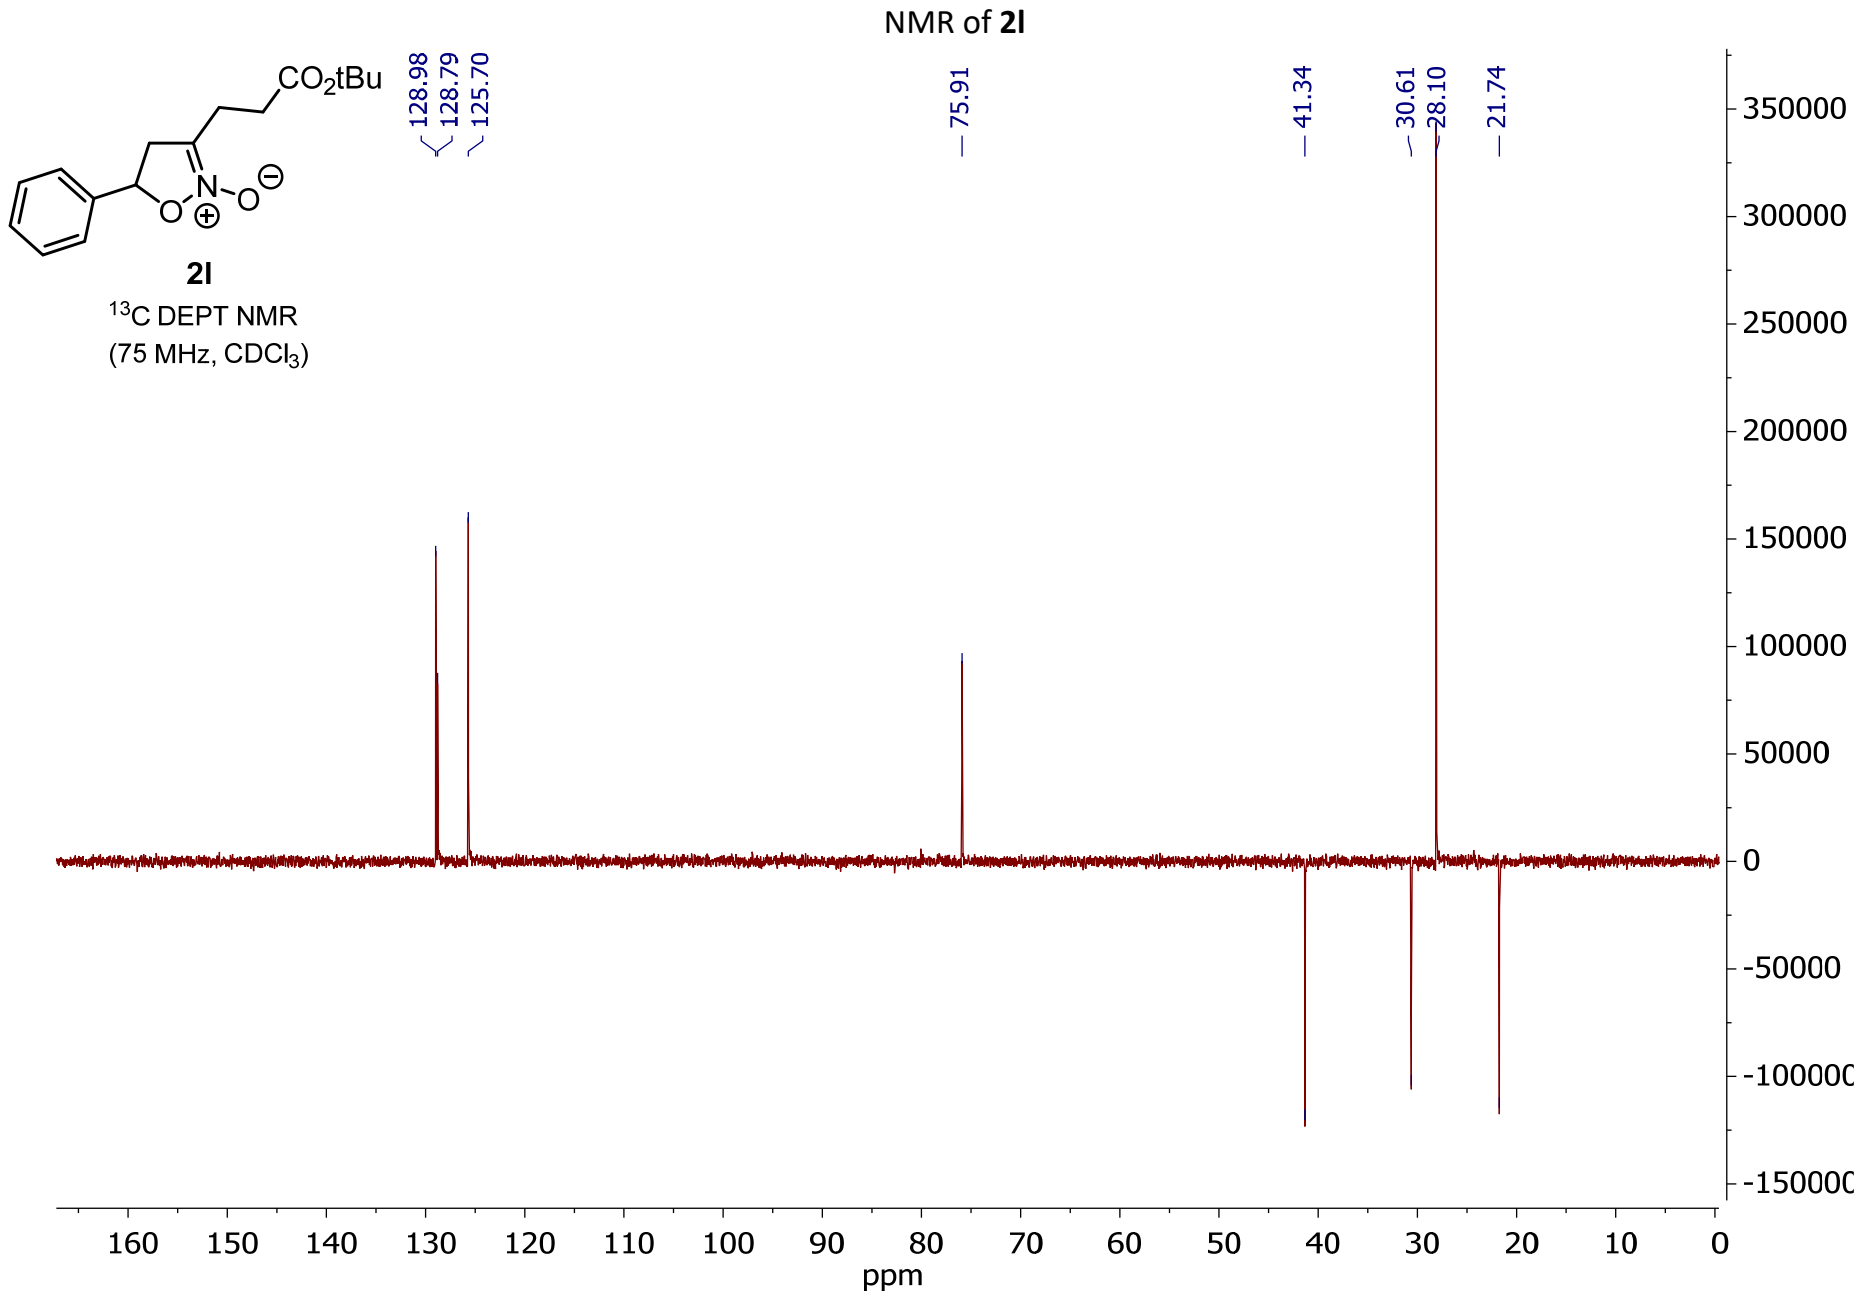



# NMR of 2I

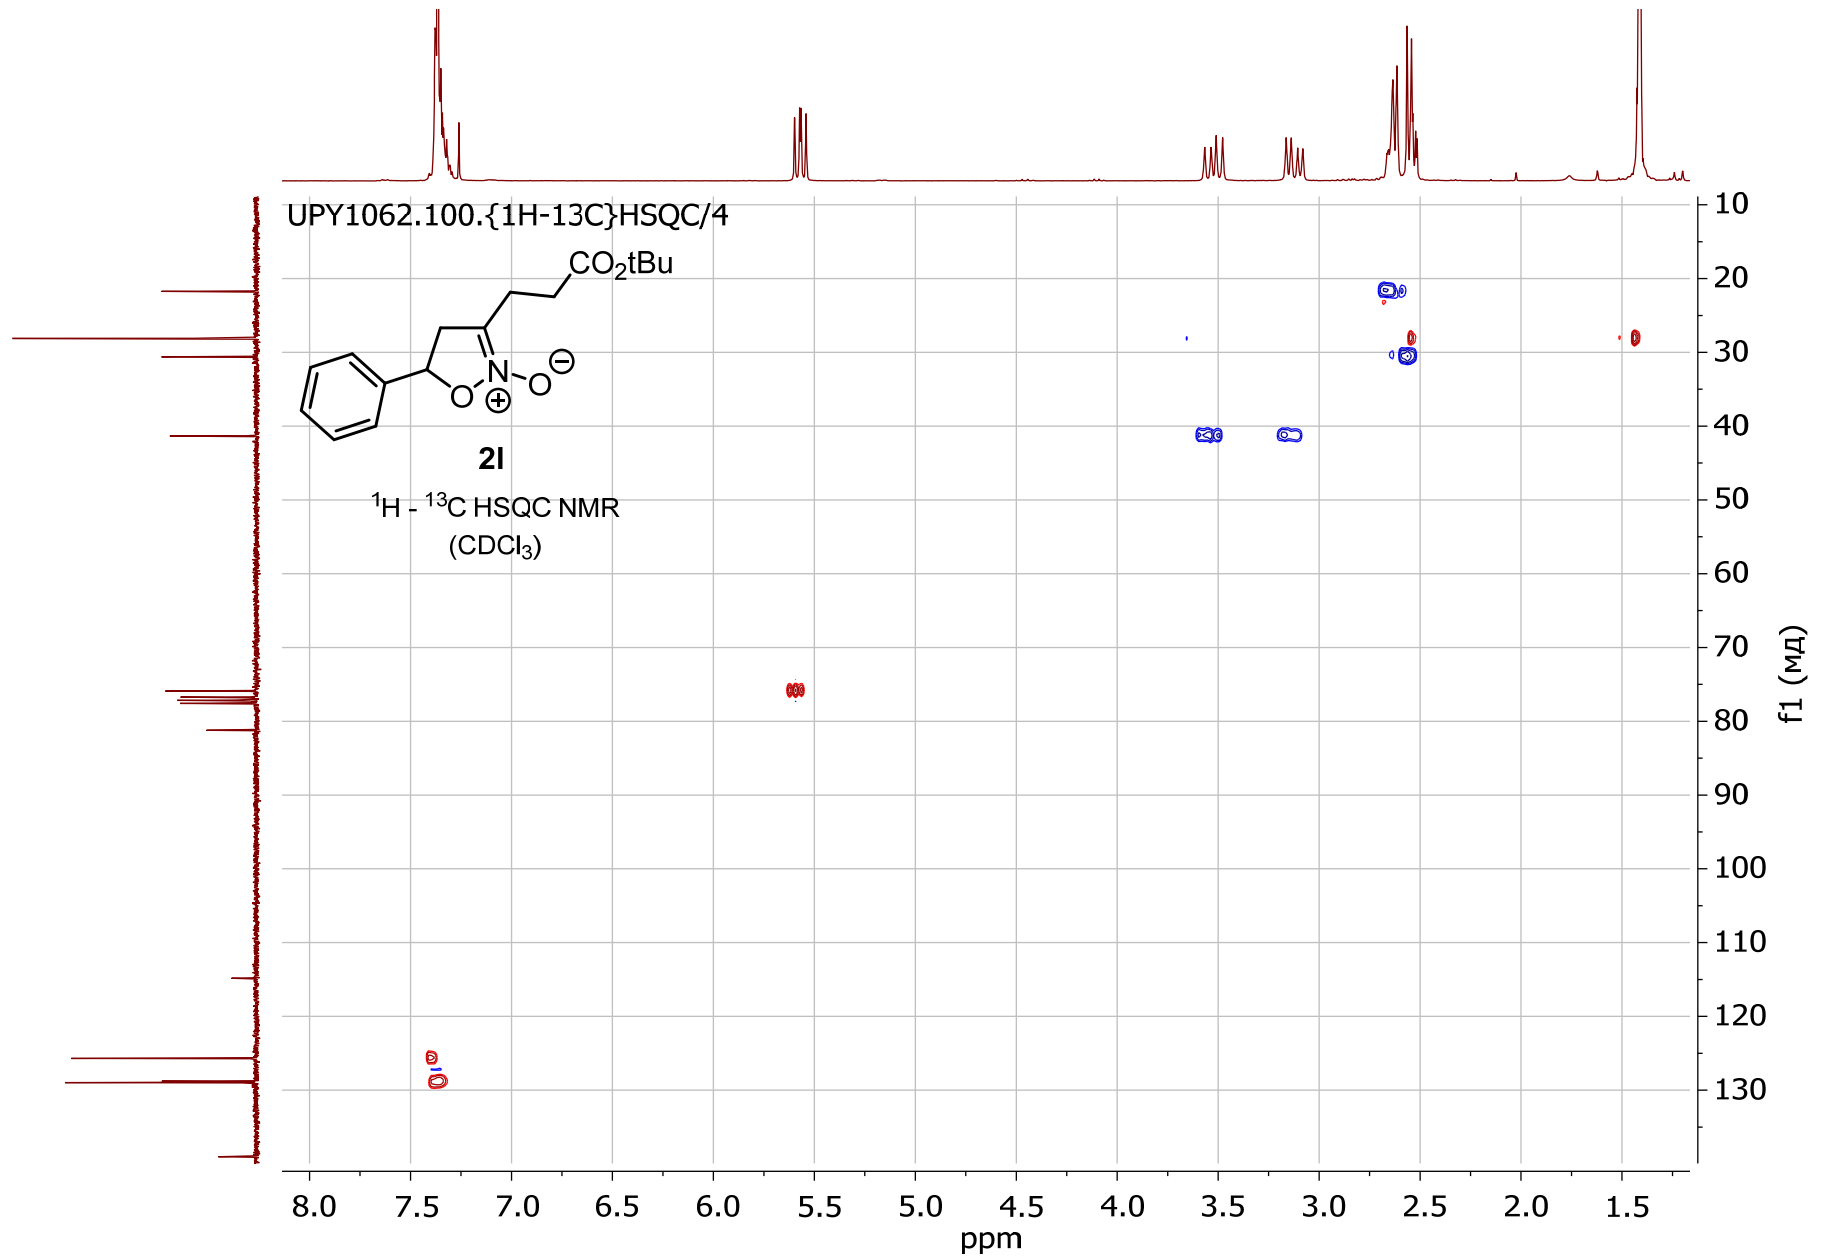

# NMR of 2m

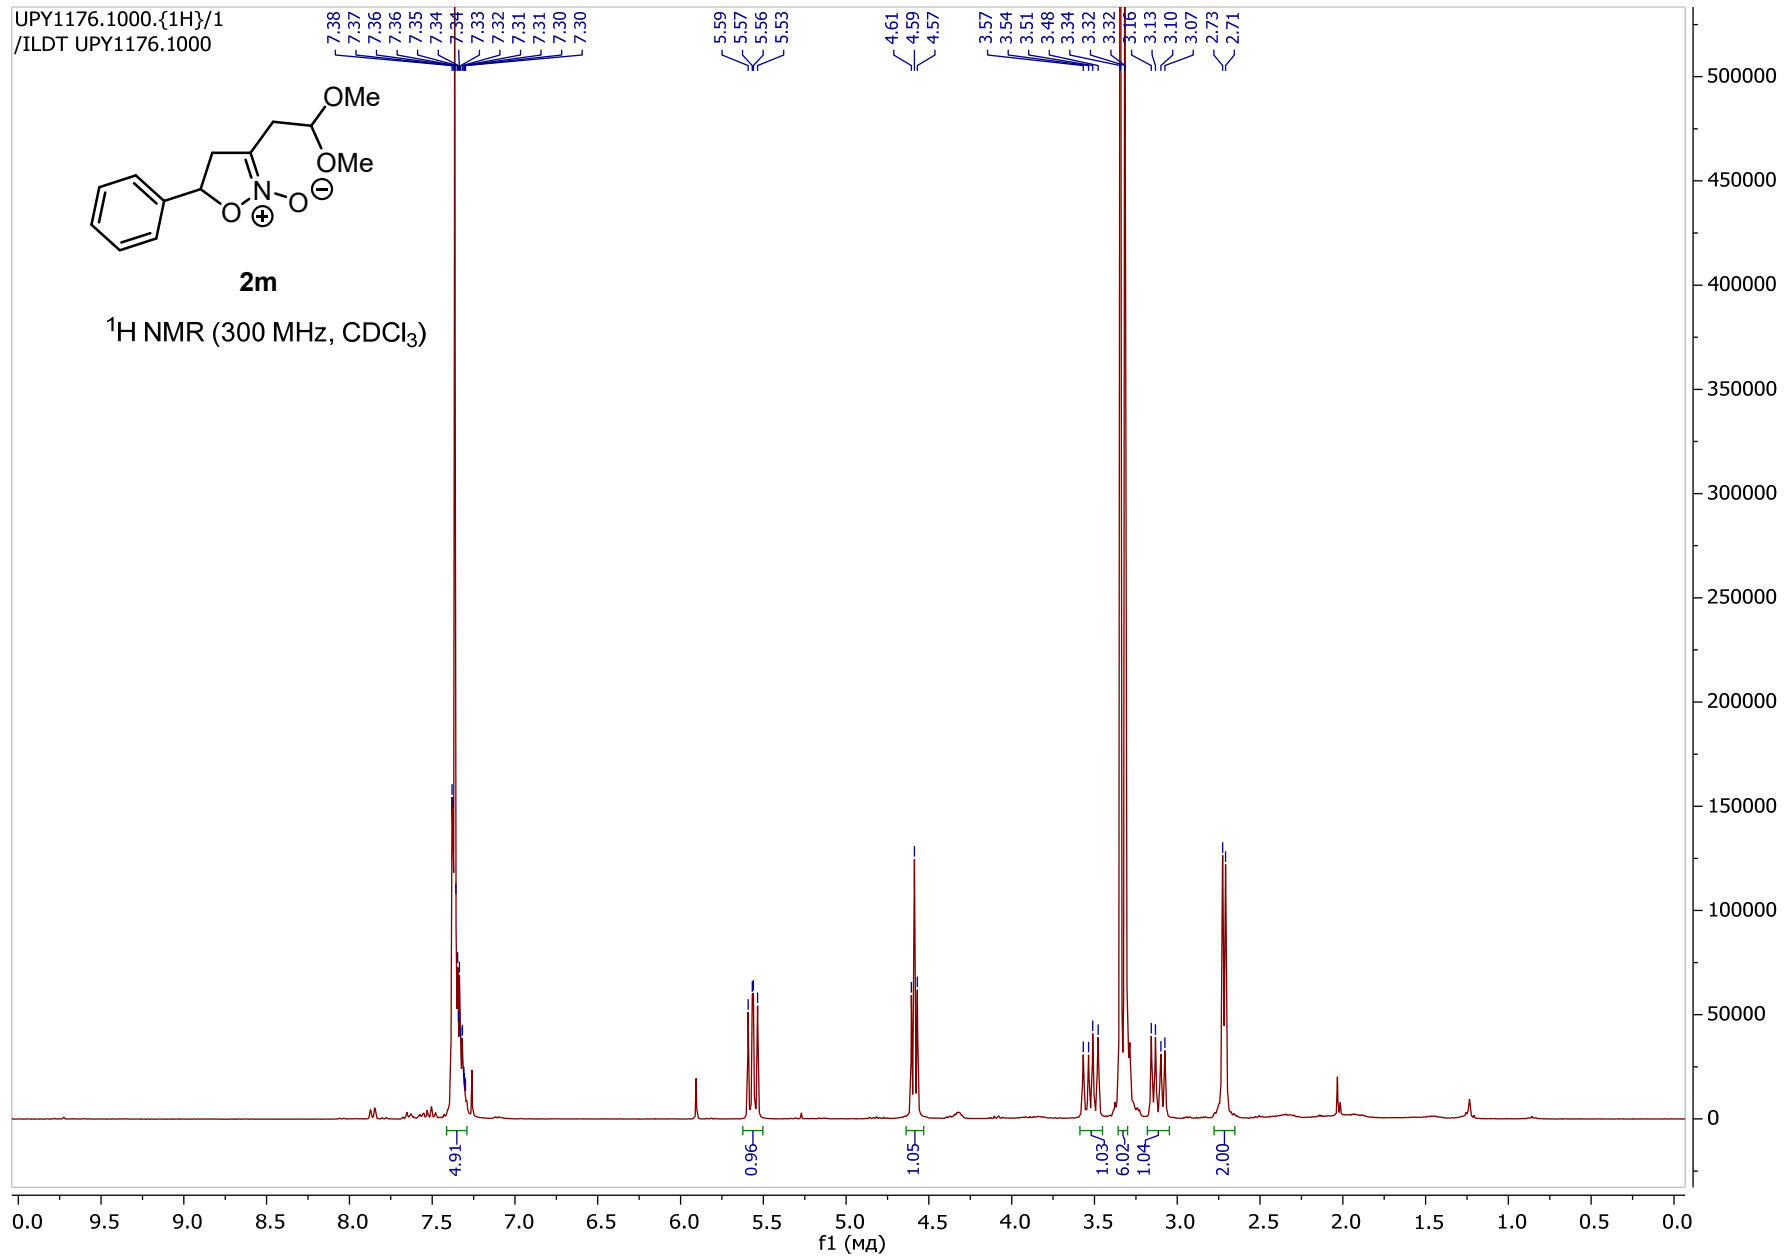

# NMR of 2m

UPY1176.1000.{13C}/2  
/ILD T UPY1176.1000

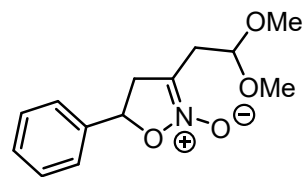

**2m**

<sup>13</sup>C NMR (75 MHz, CDCl<sub>3</sub>)

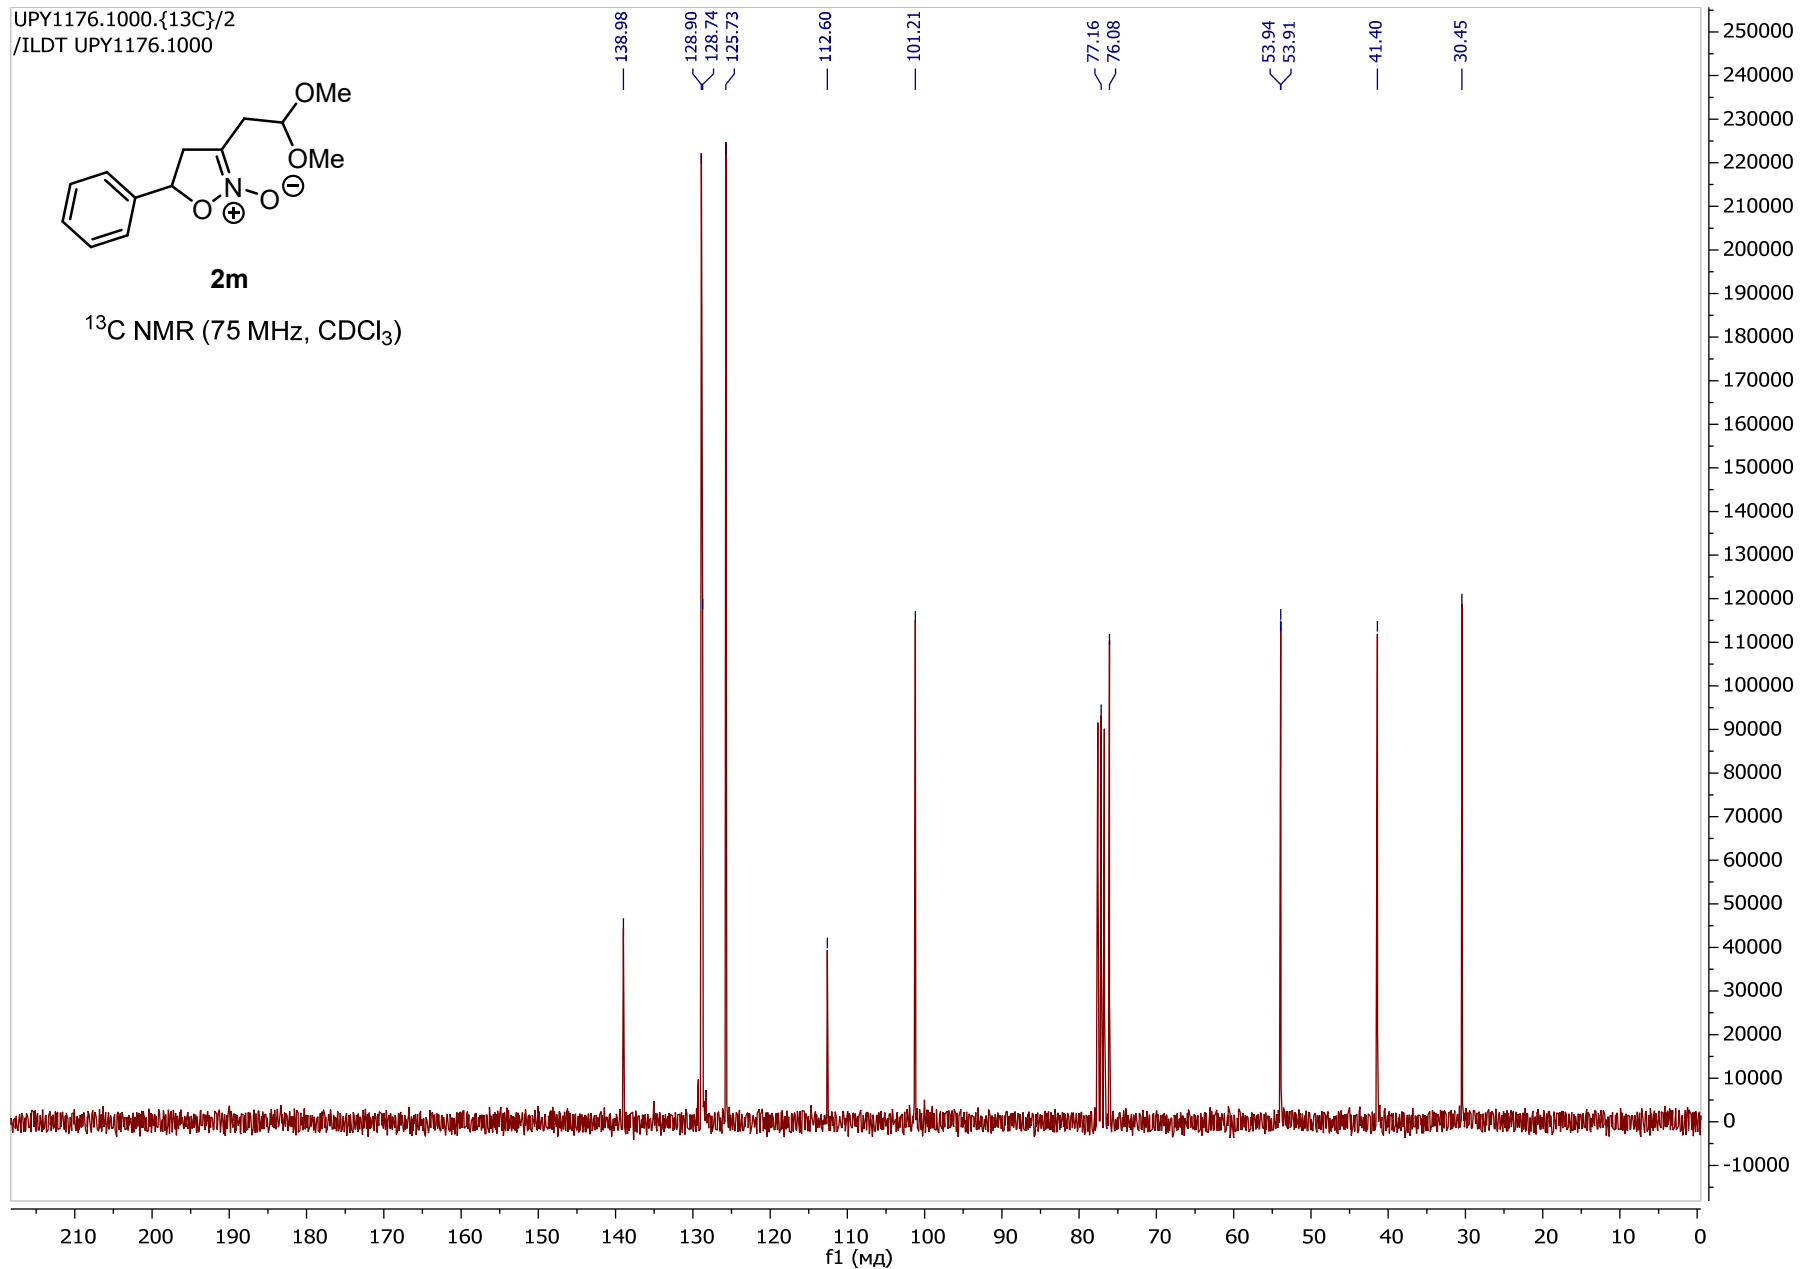

# NMR of 2m

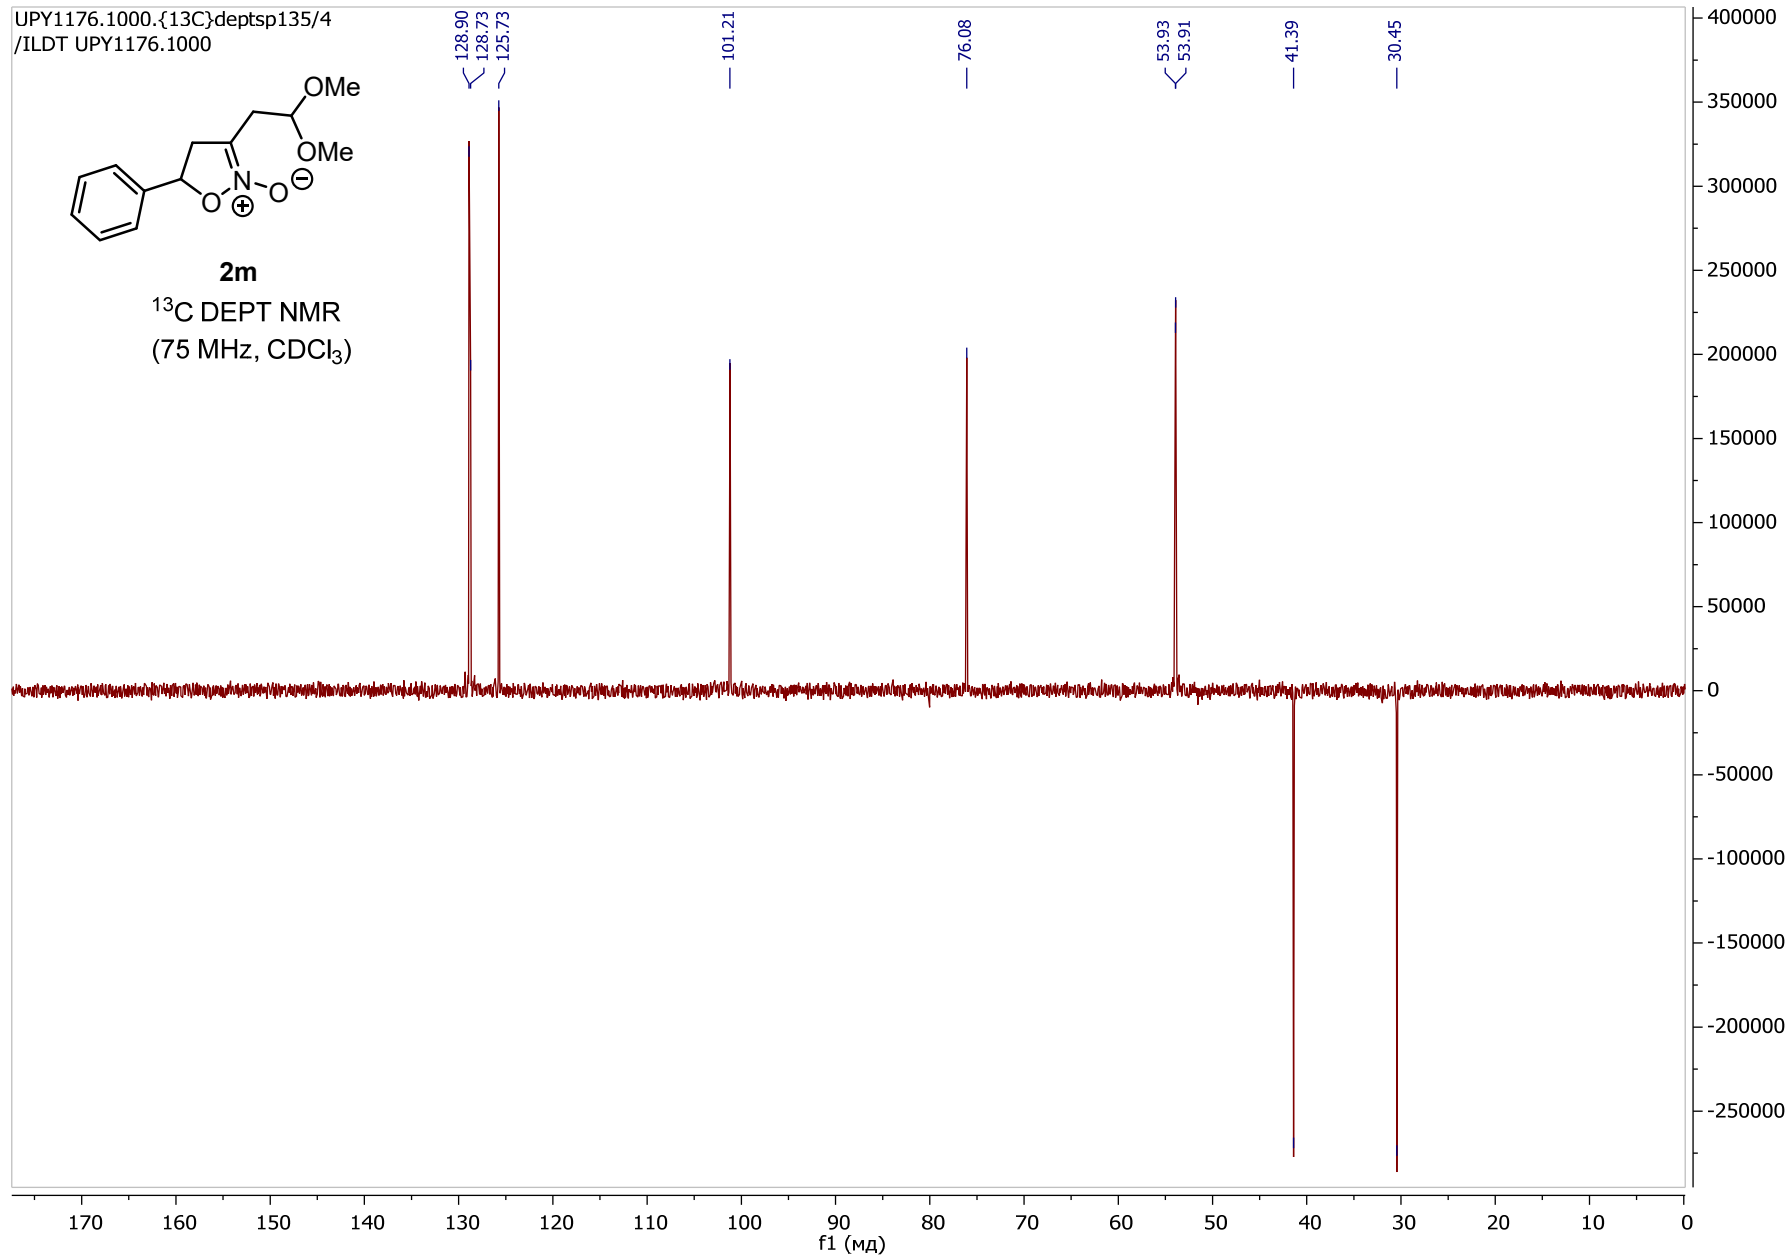

# NMR of 2m

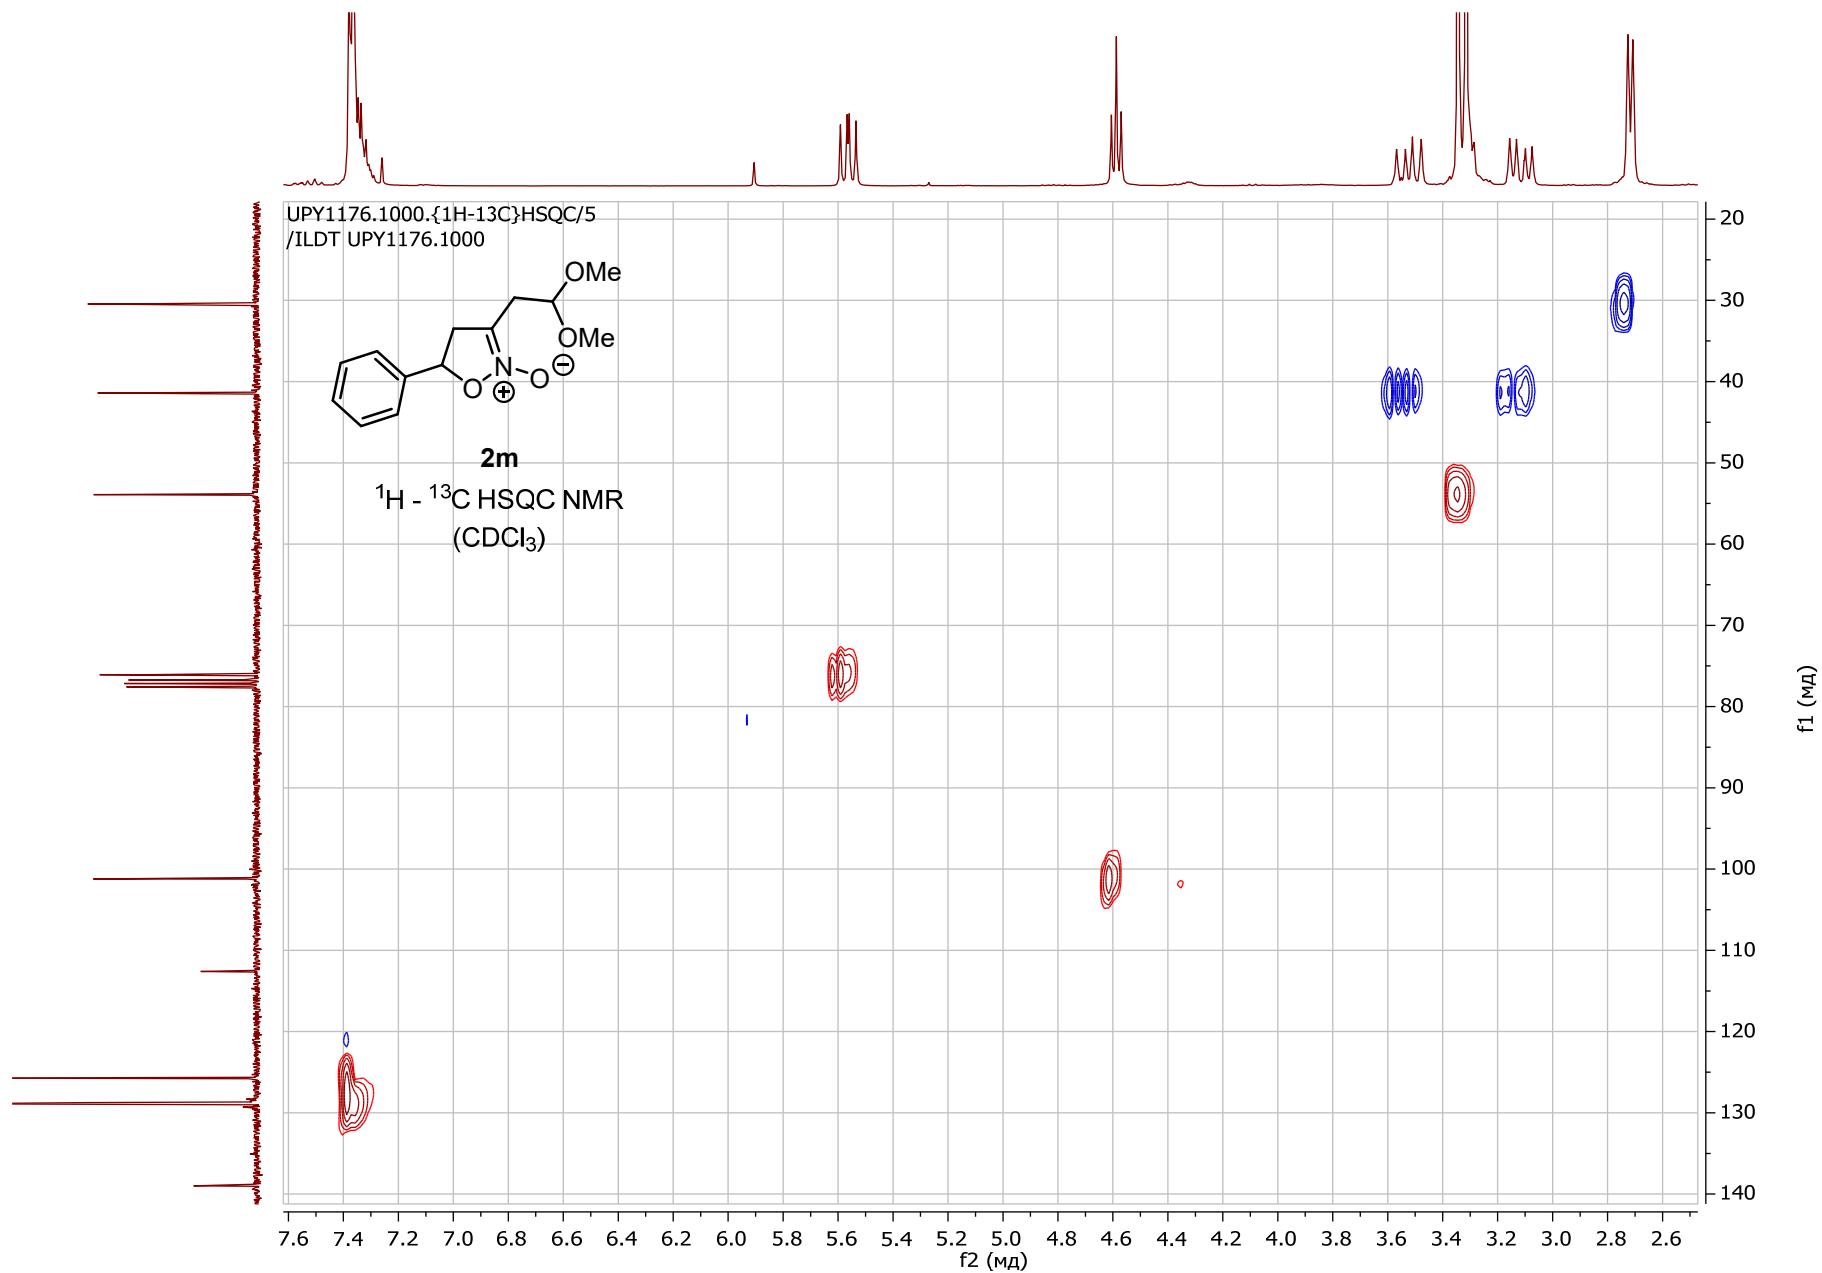

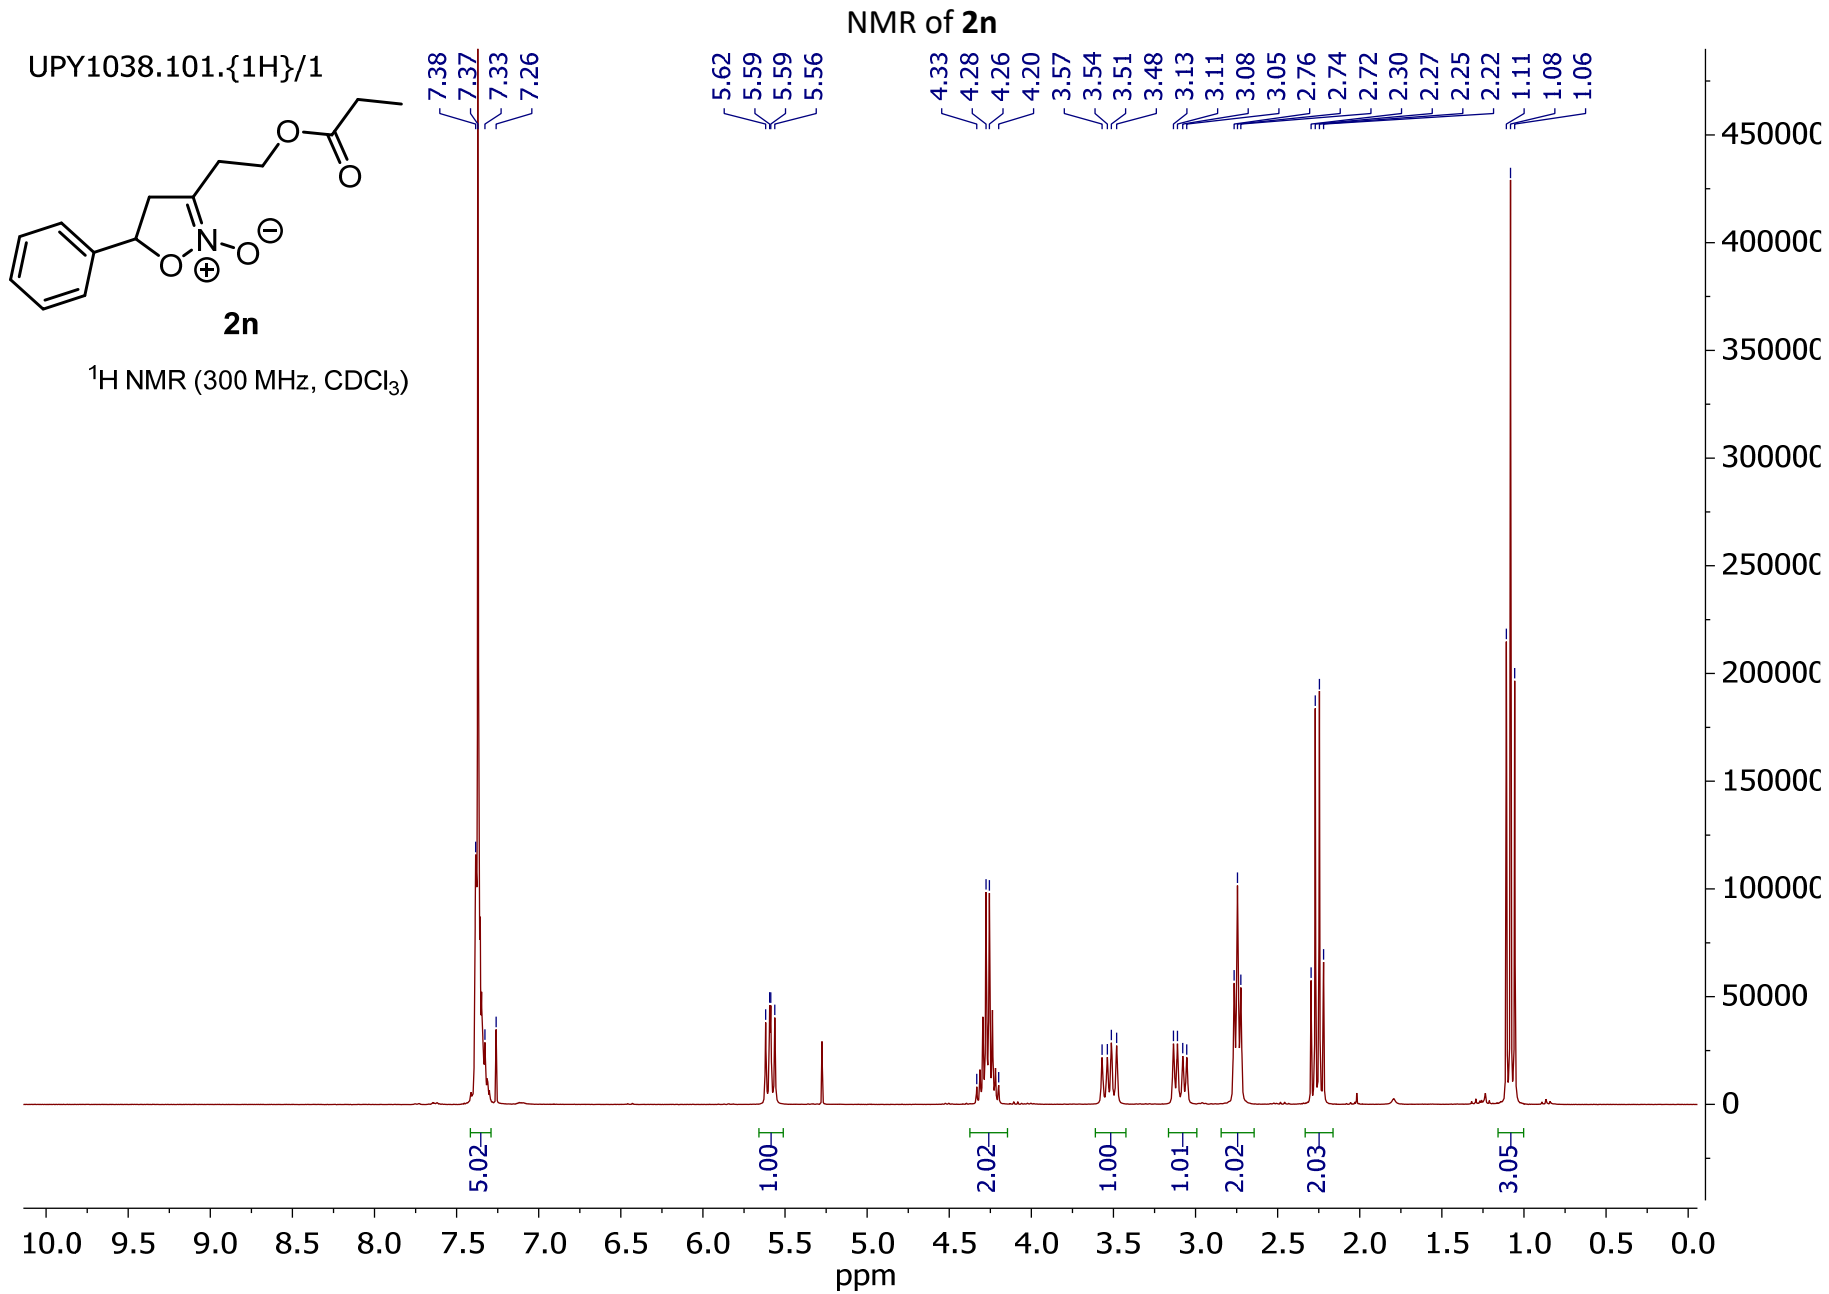

NMR of 2n

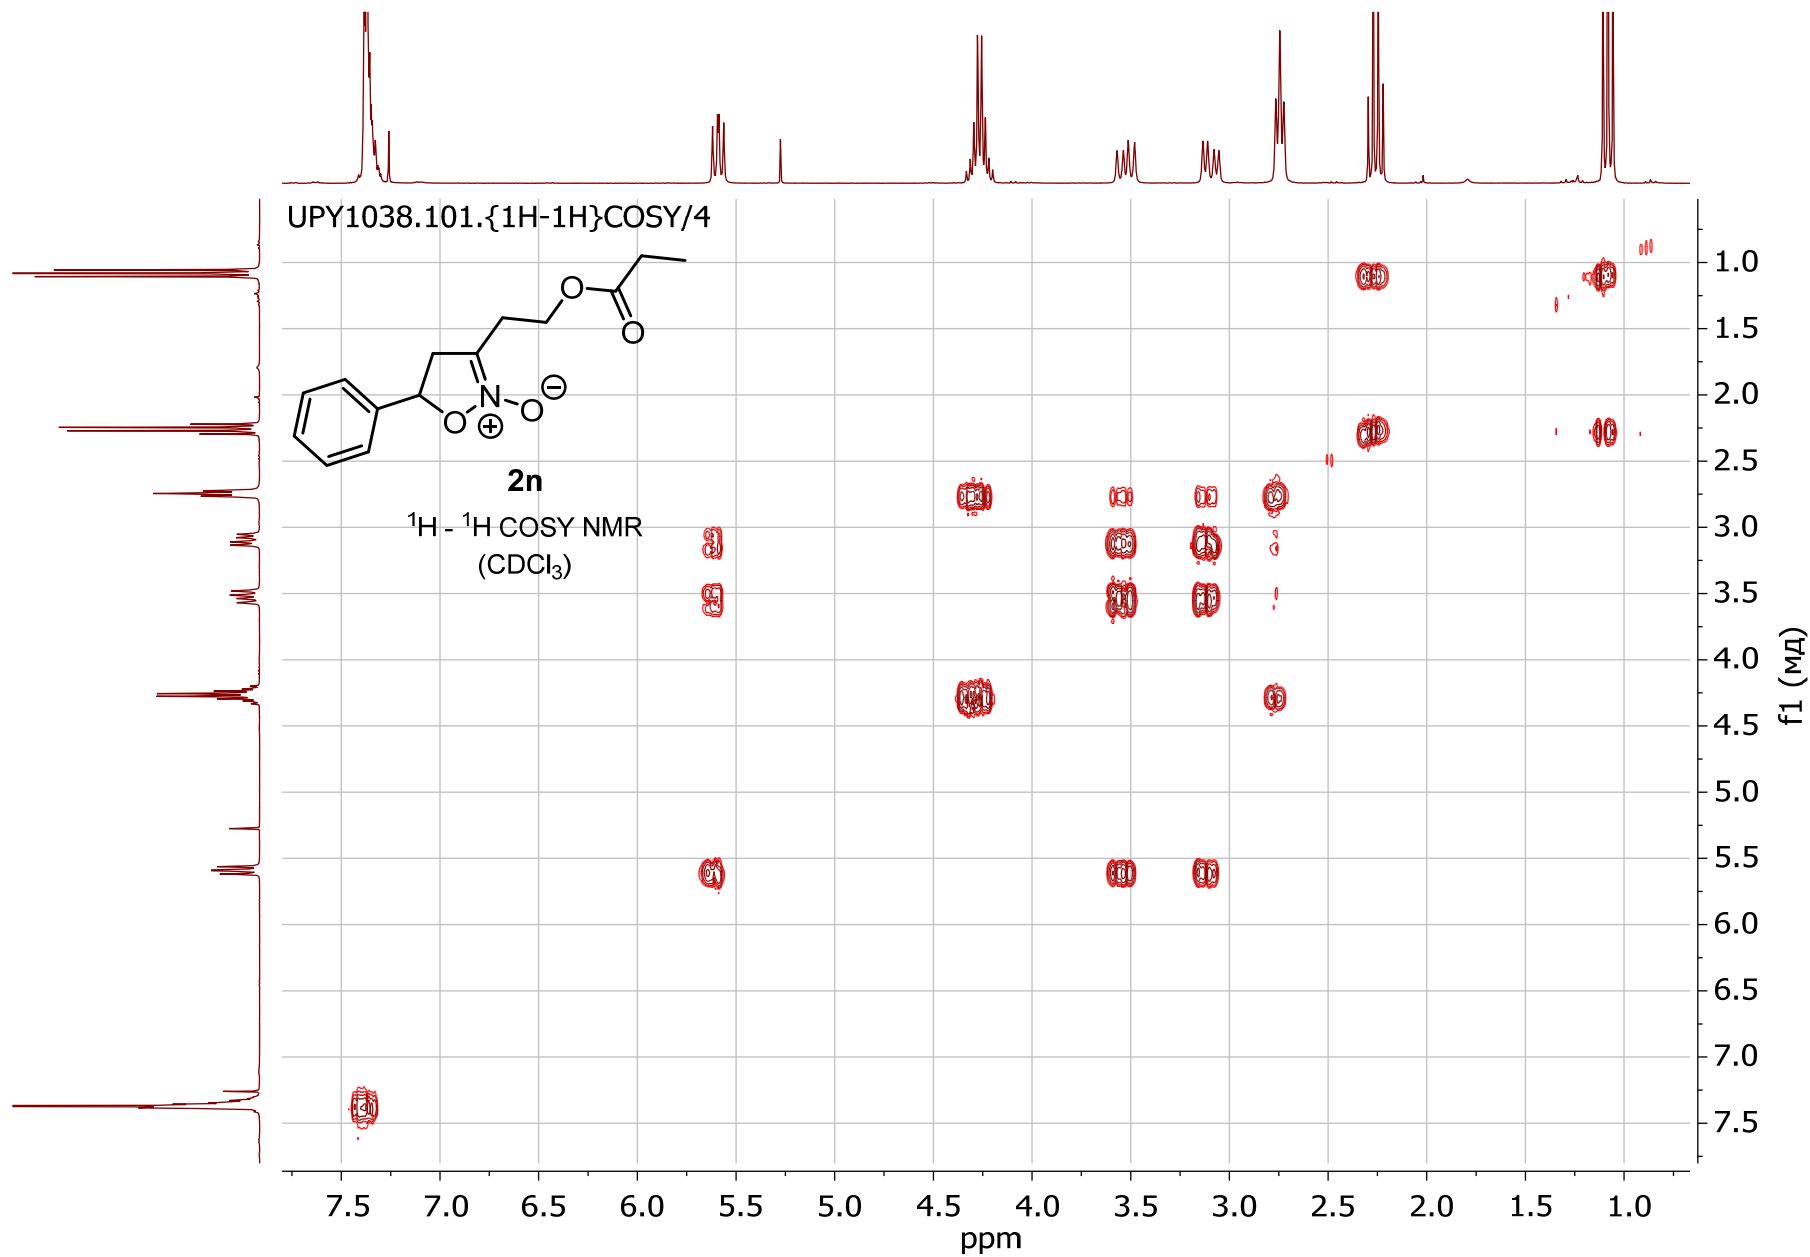

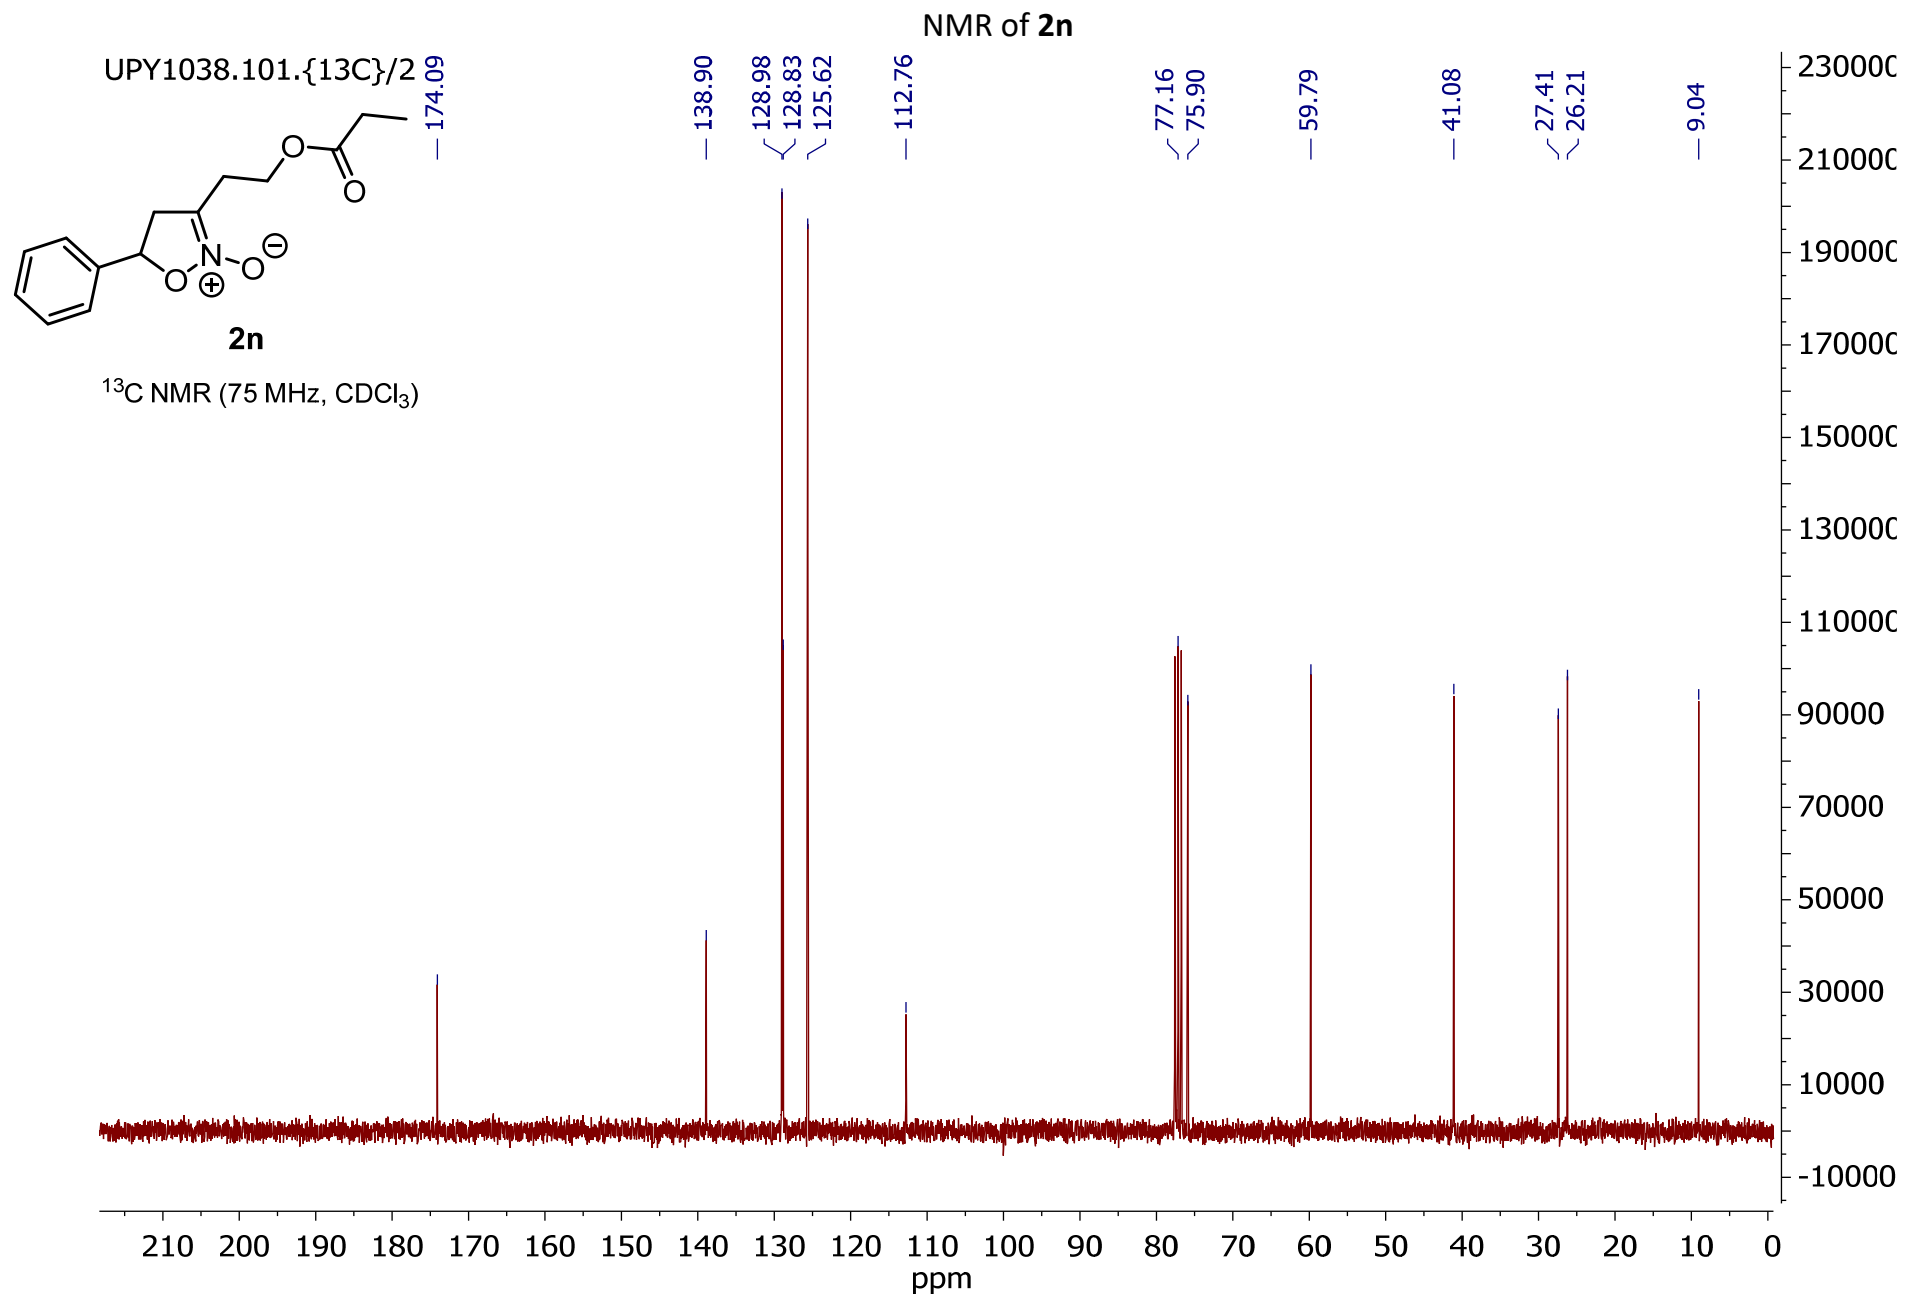



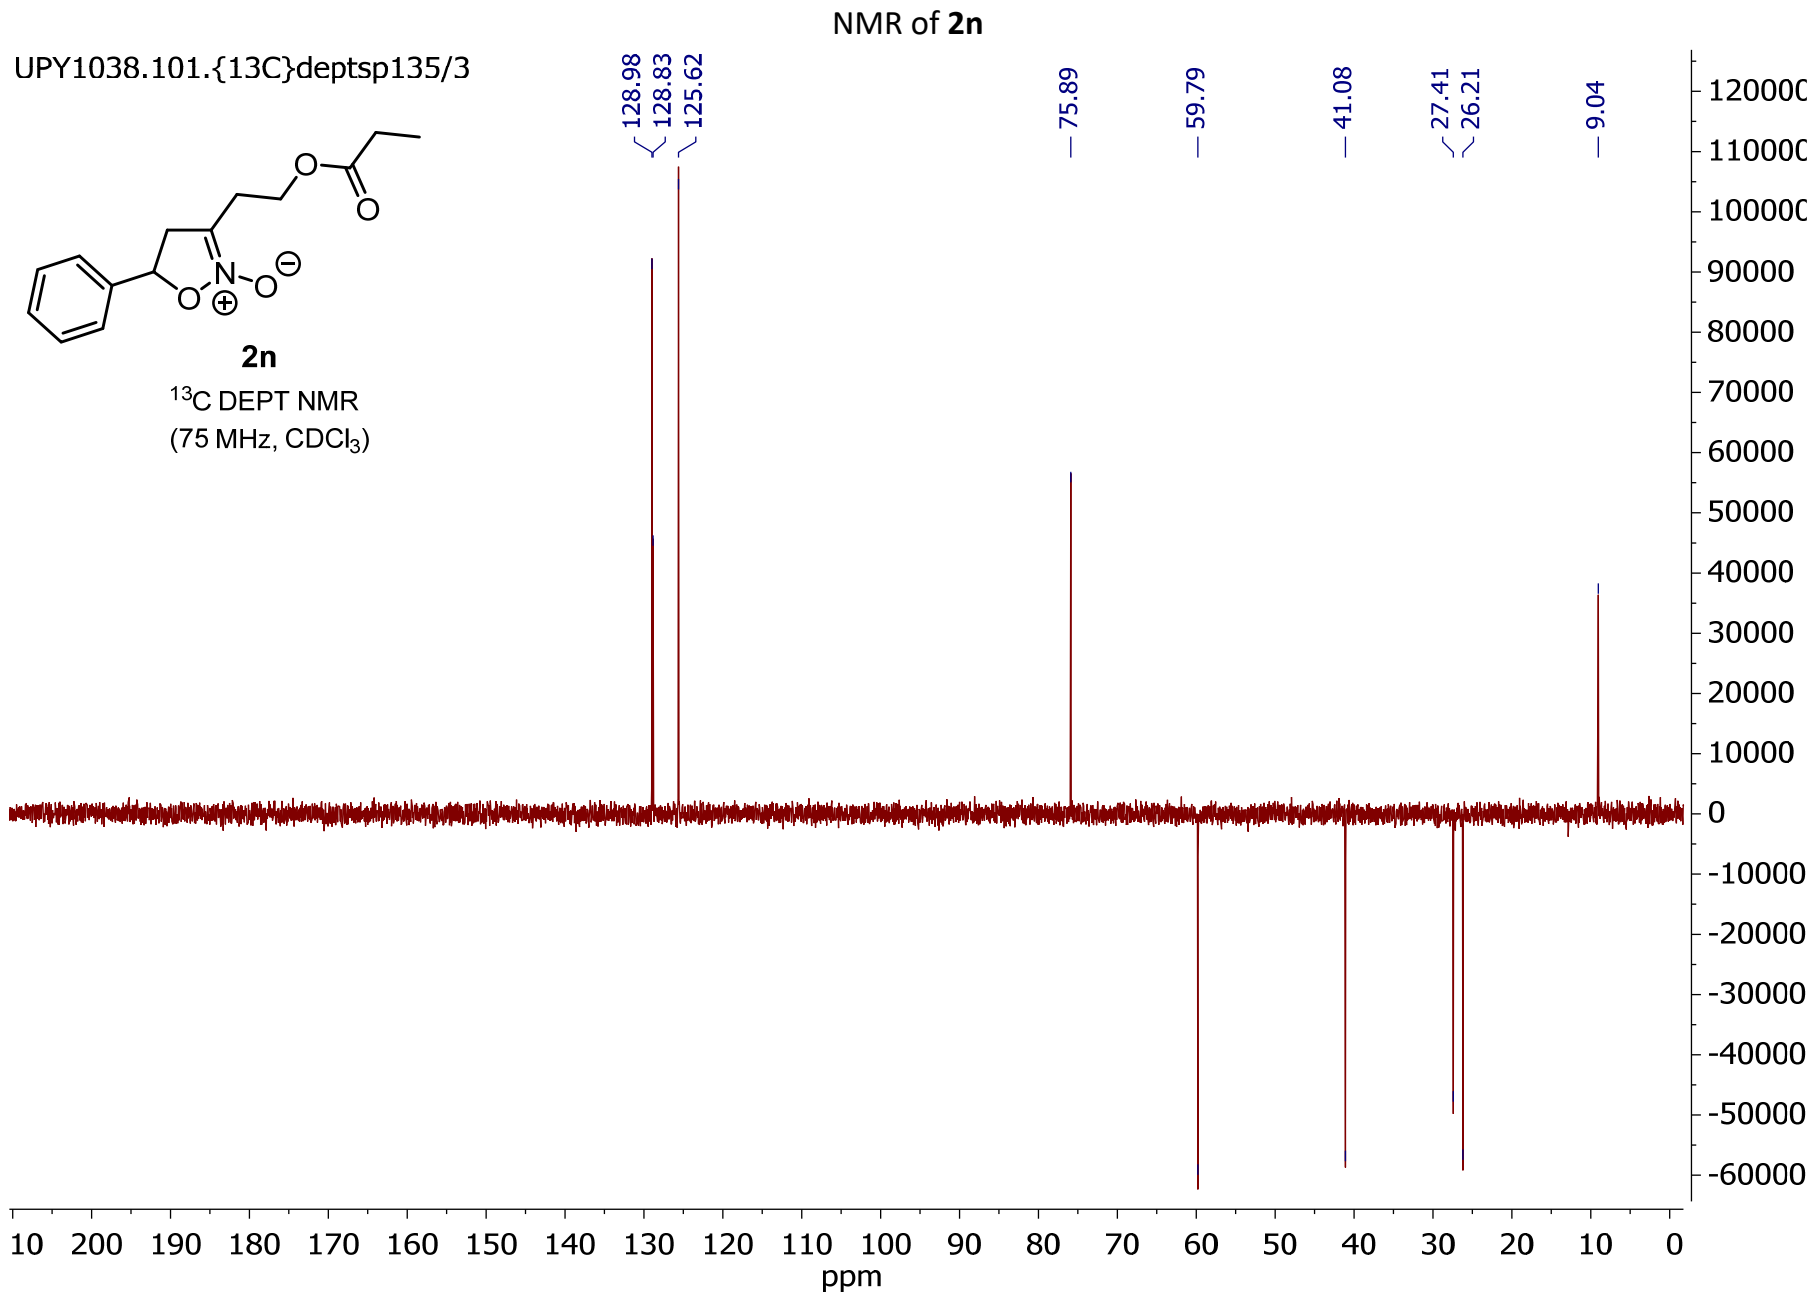

NMR of 2n

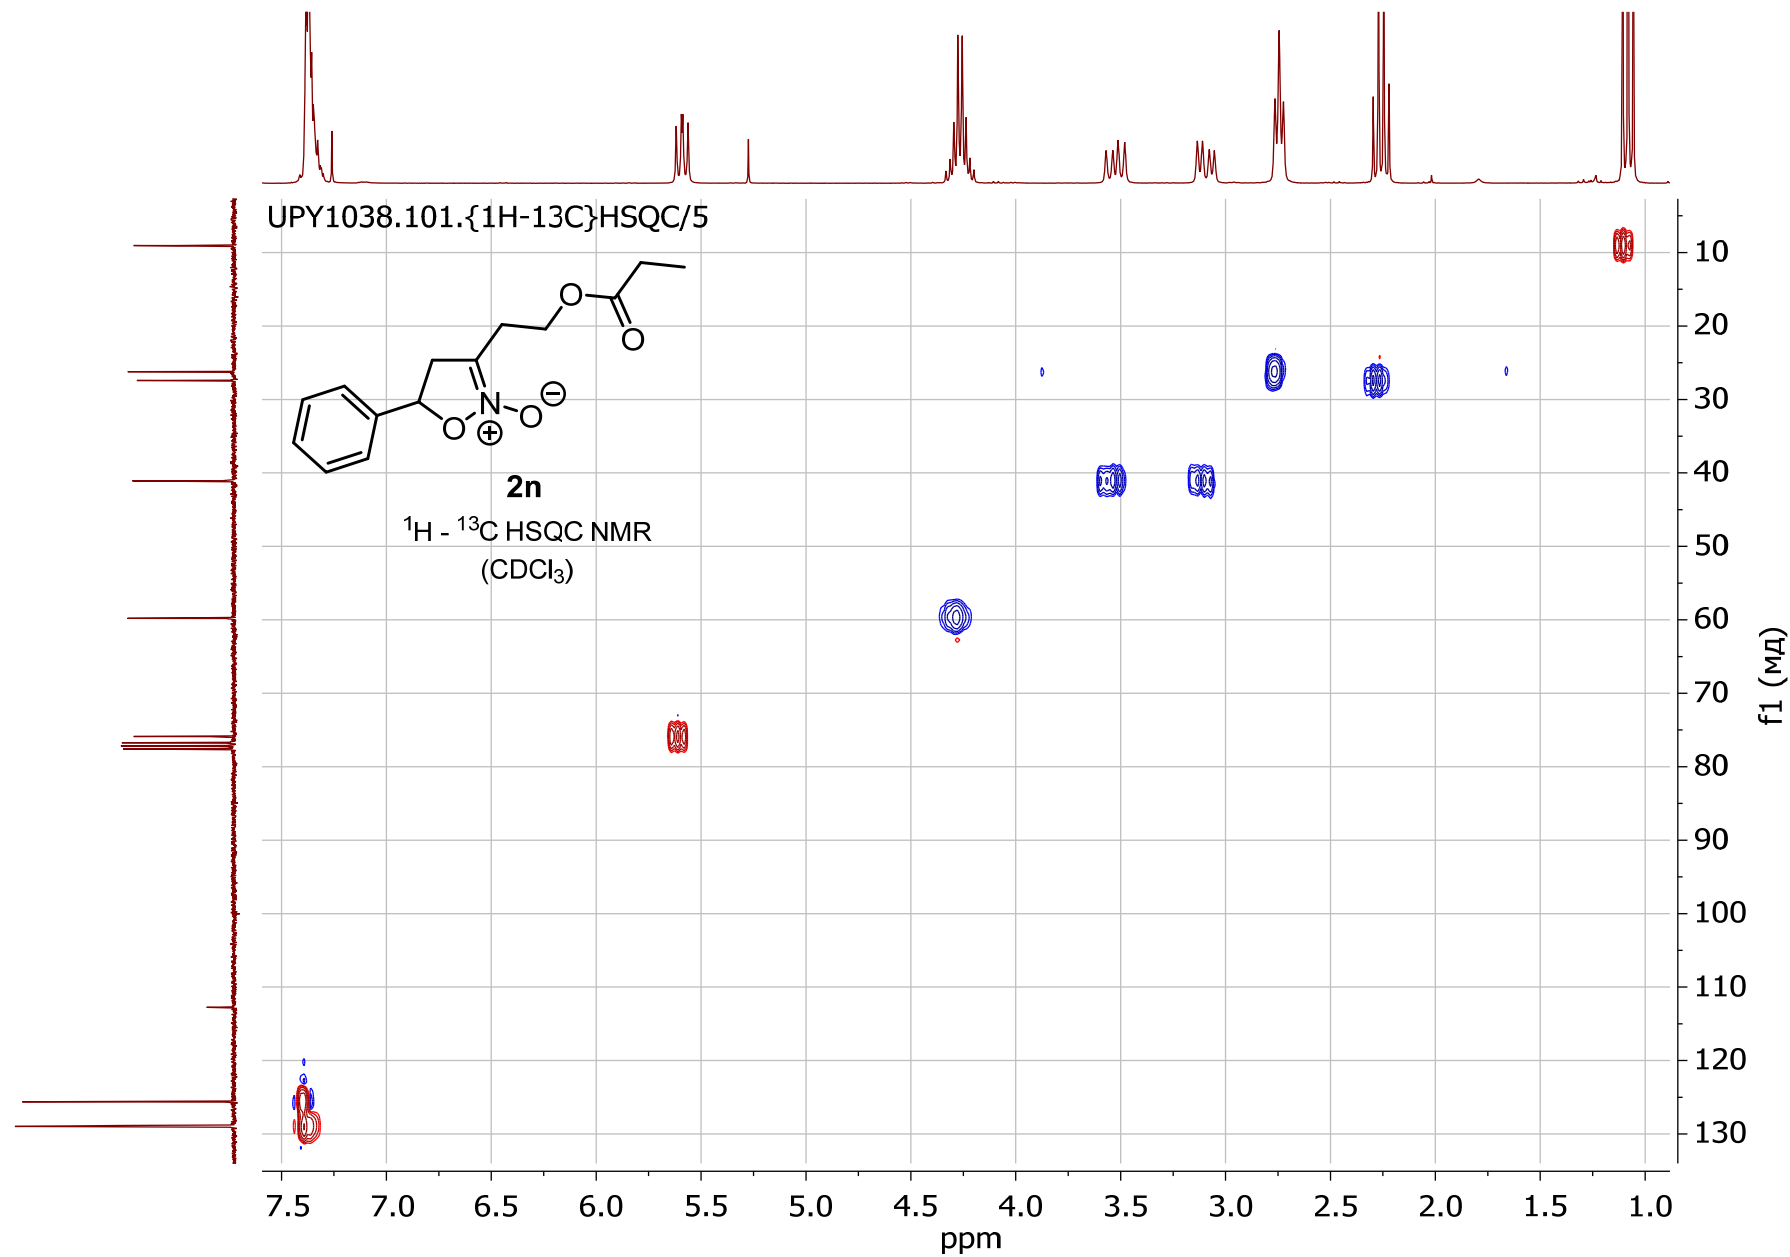

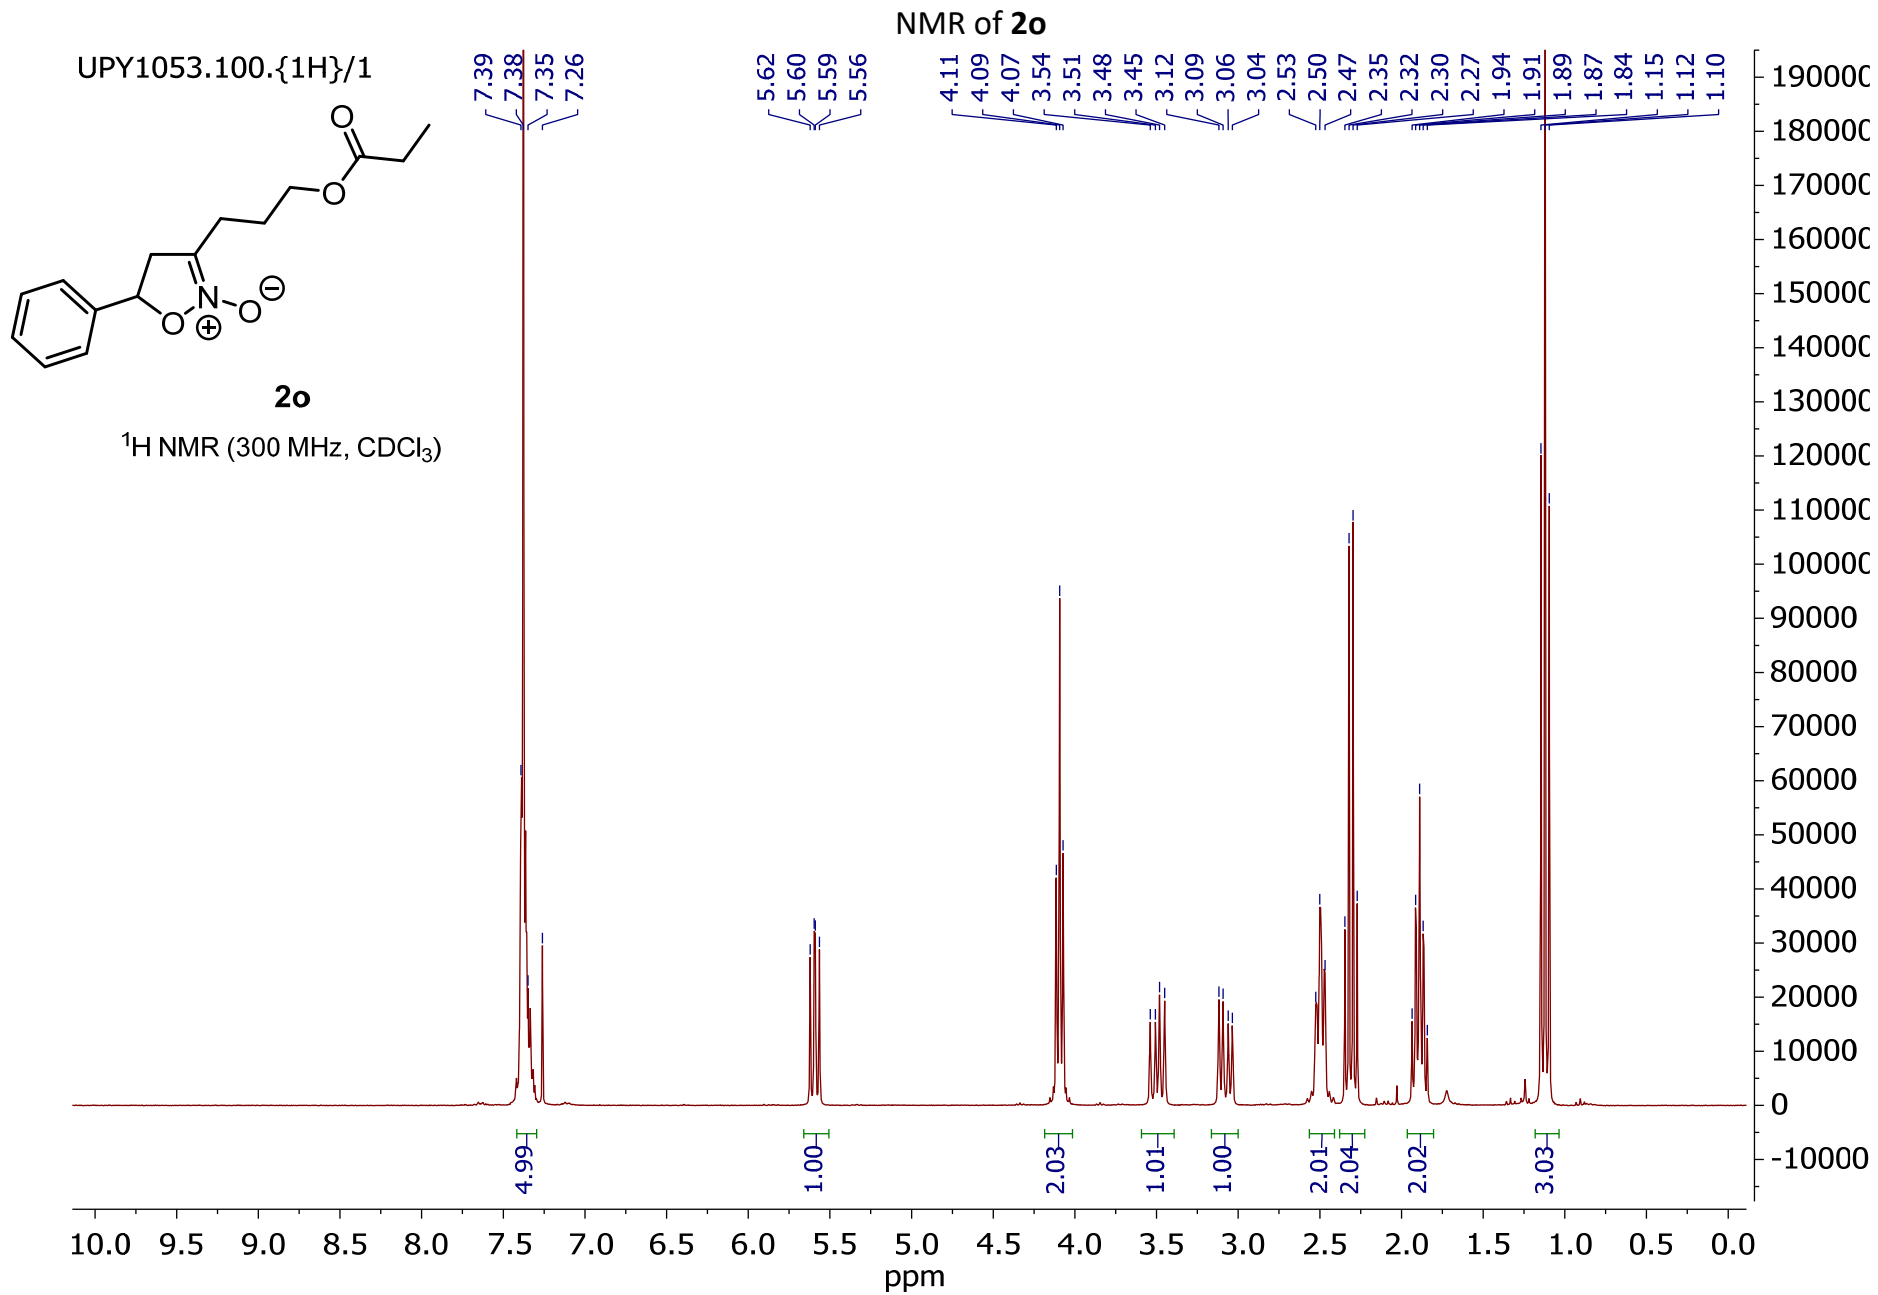

NMR of **2o**

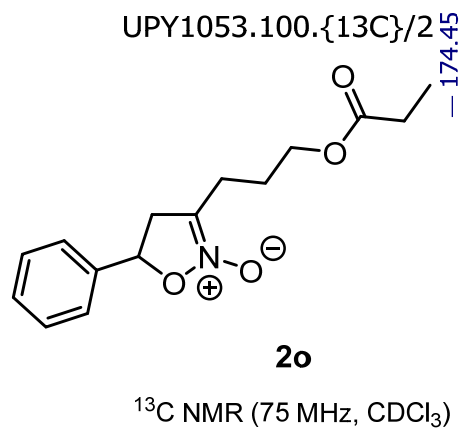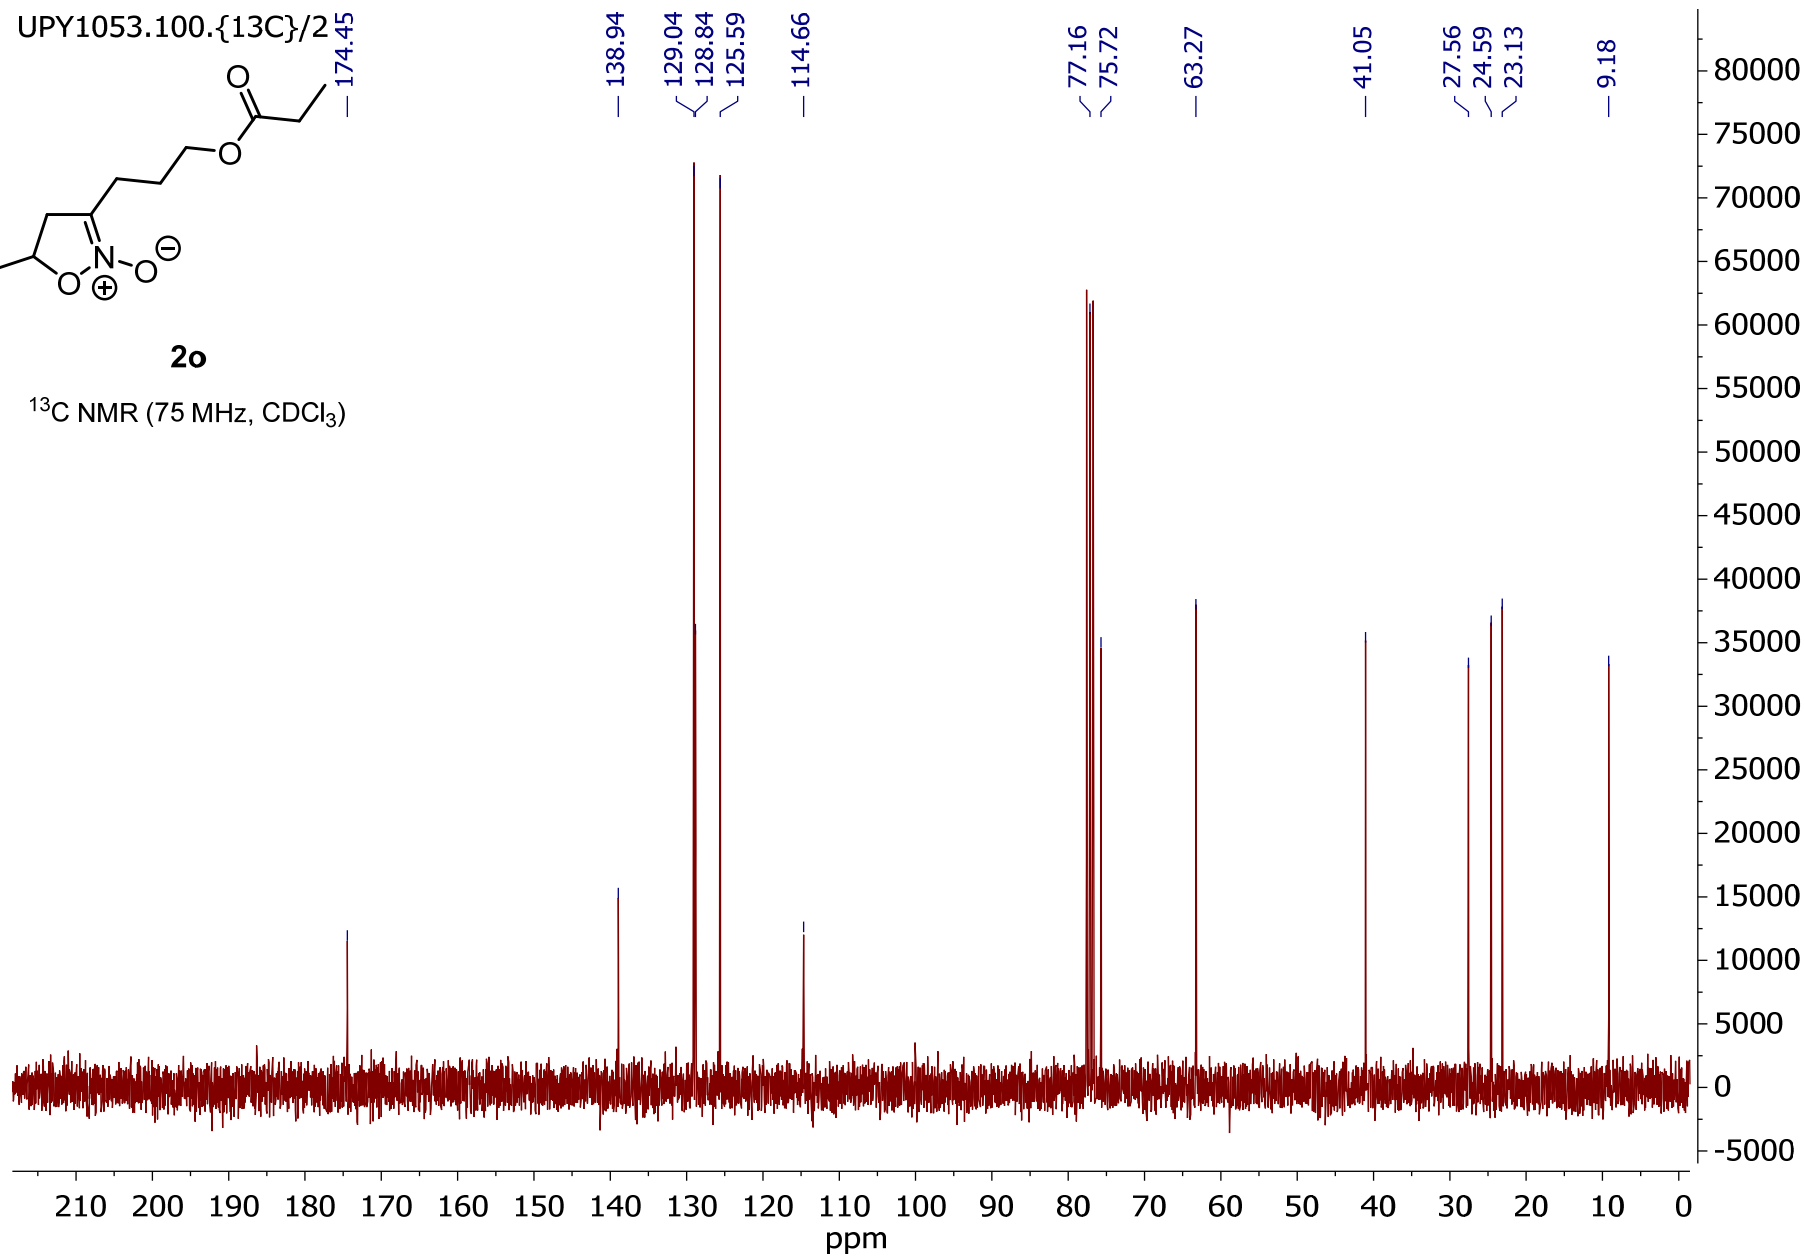

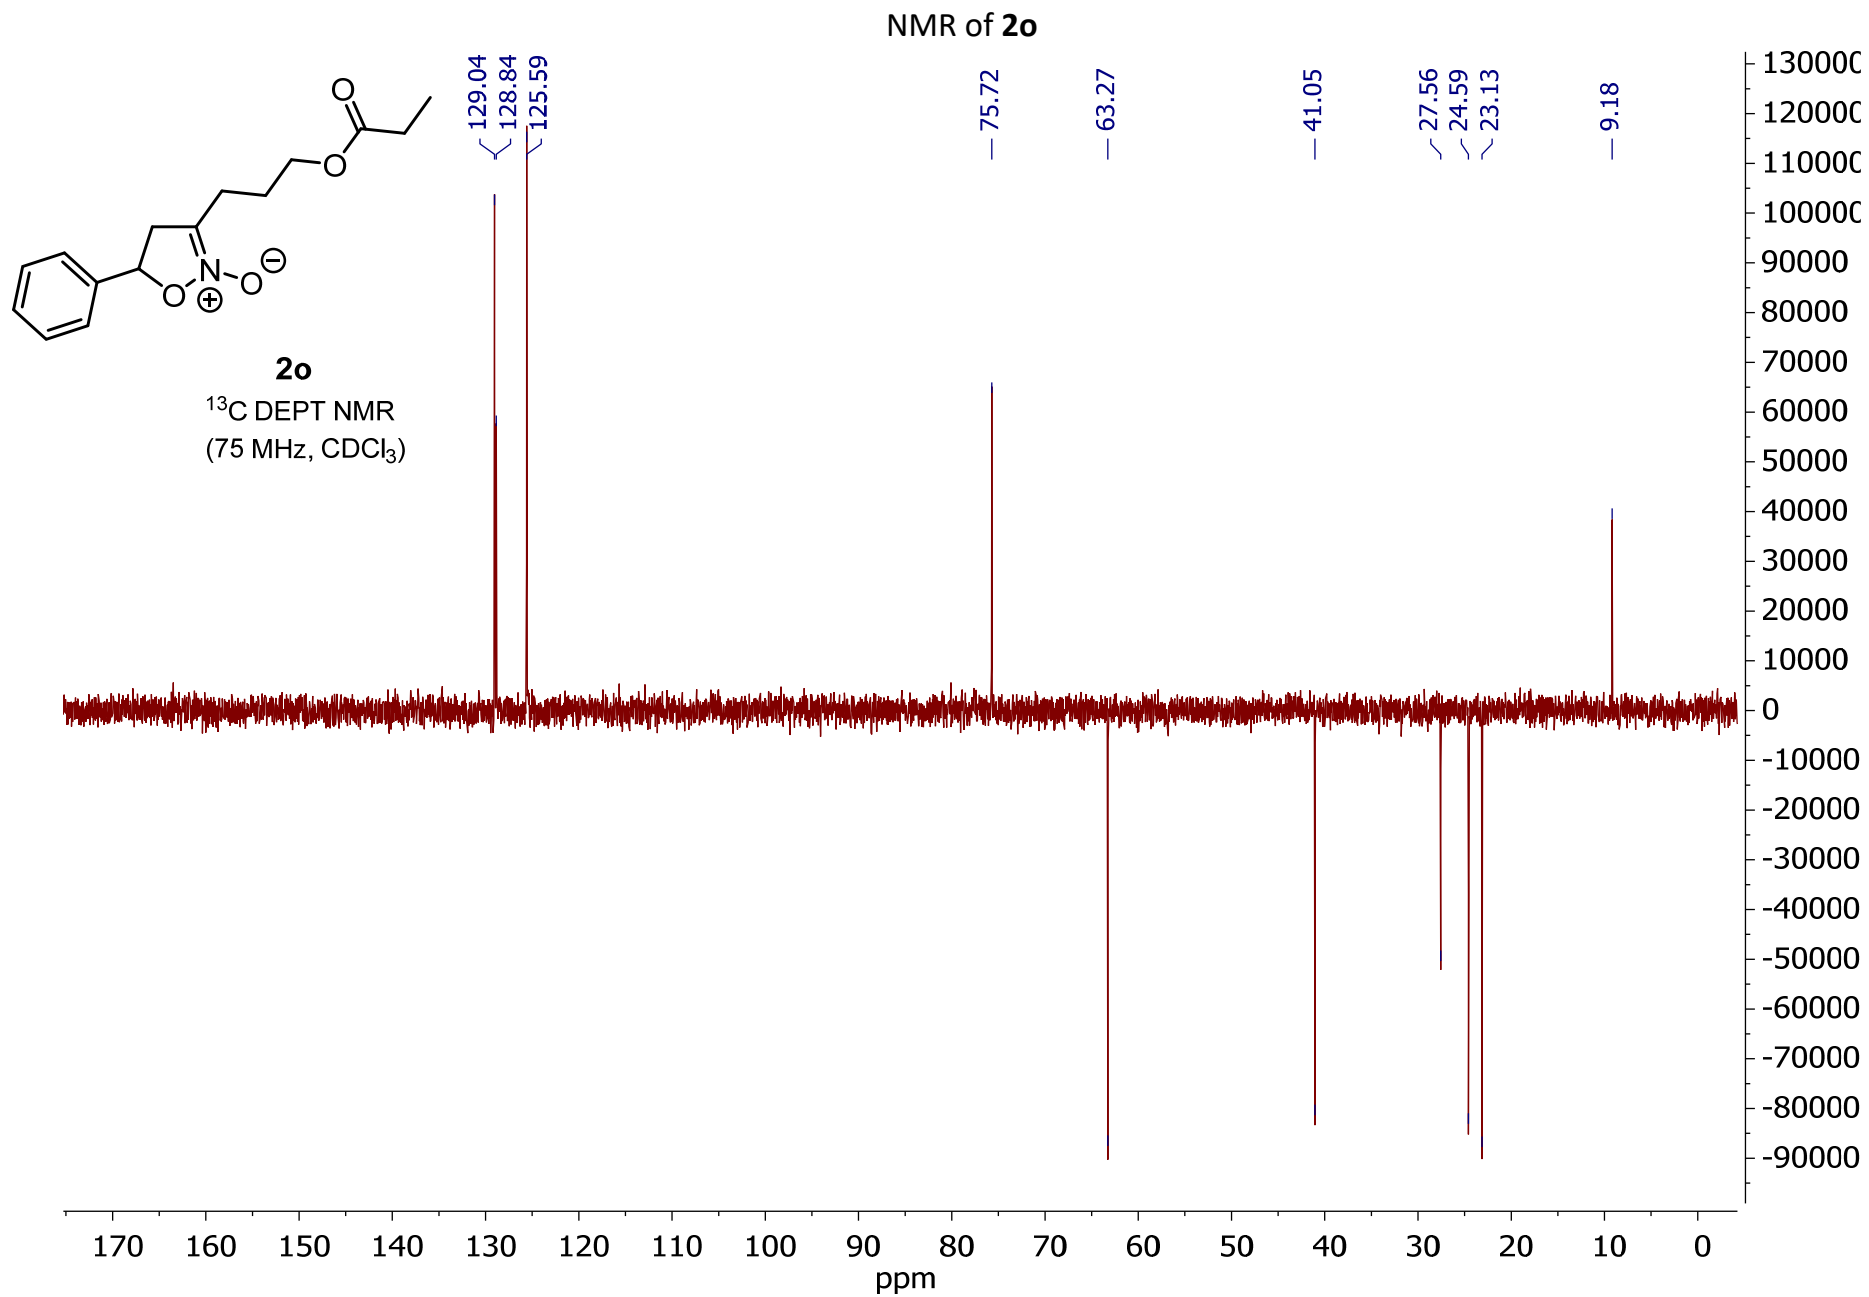

NMR of **2o**

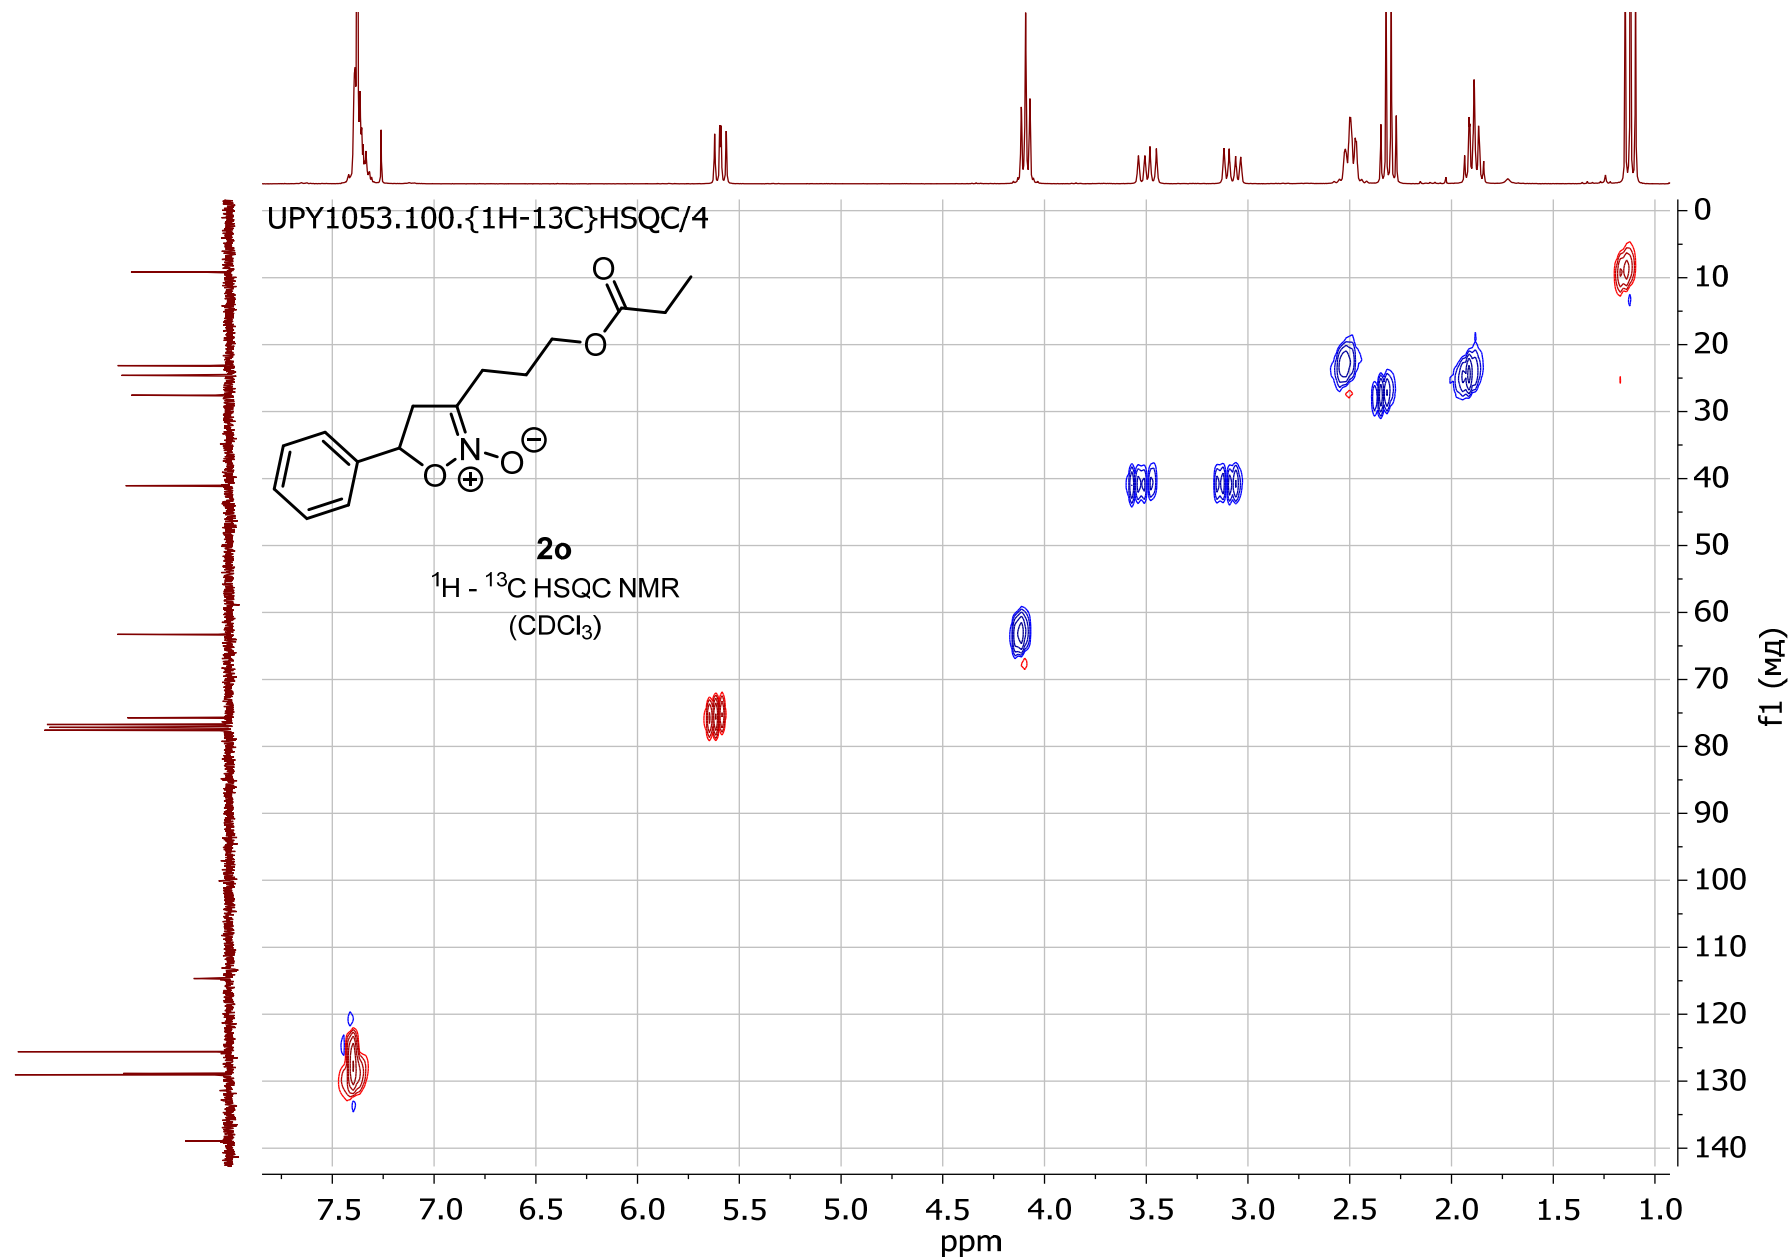

NMR of **2o**

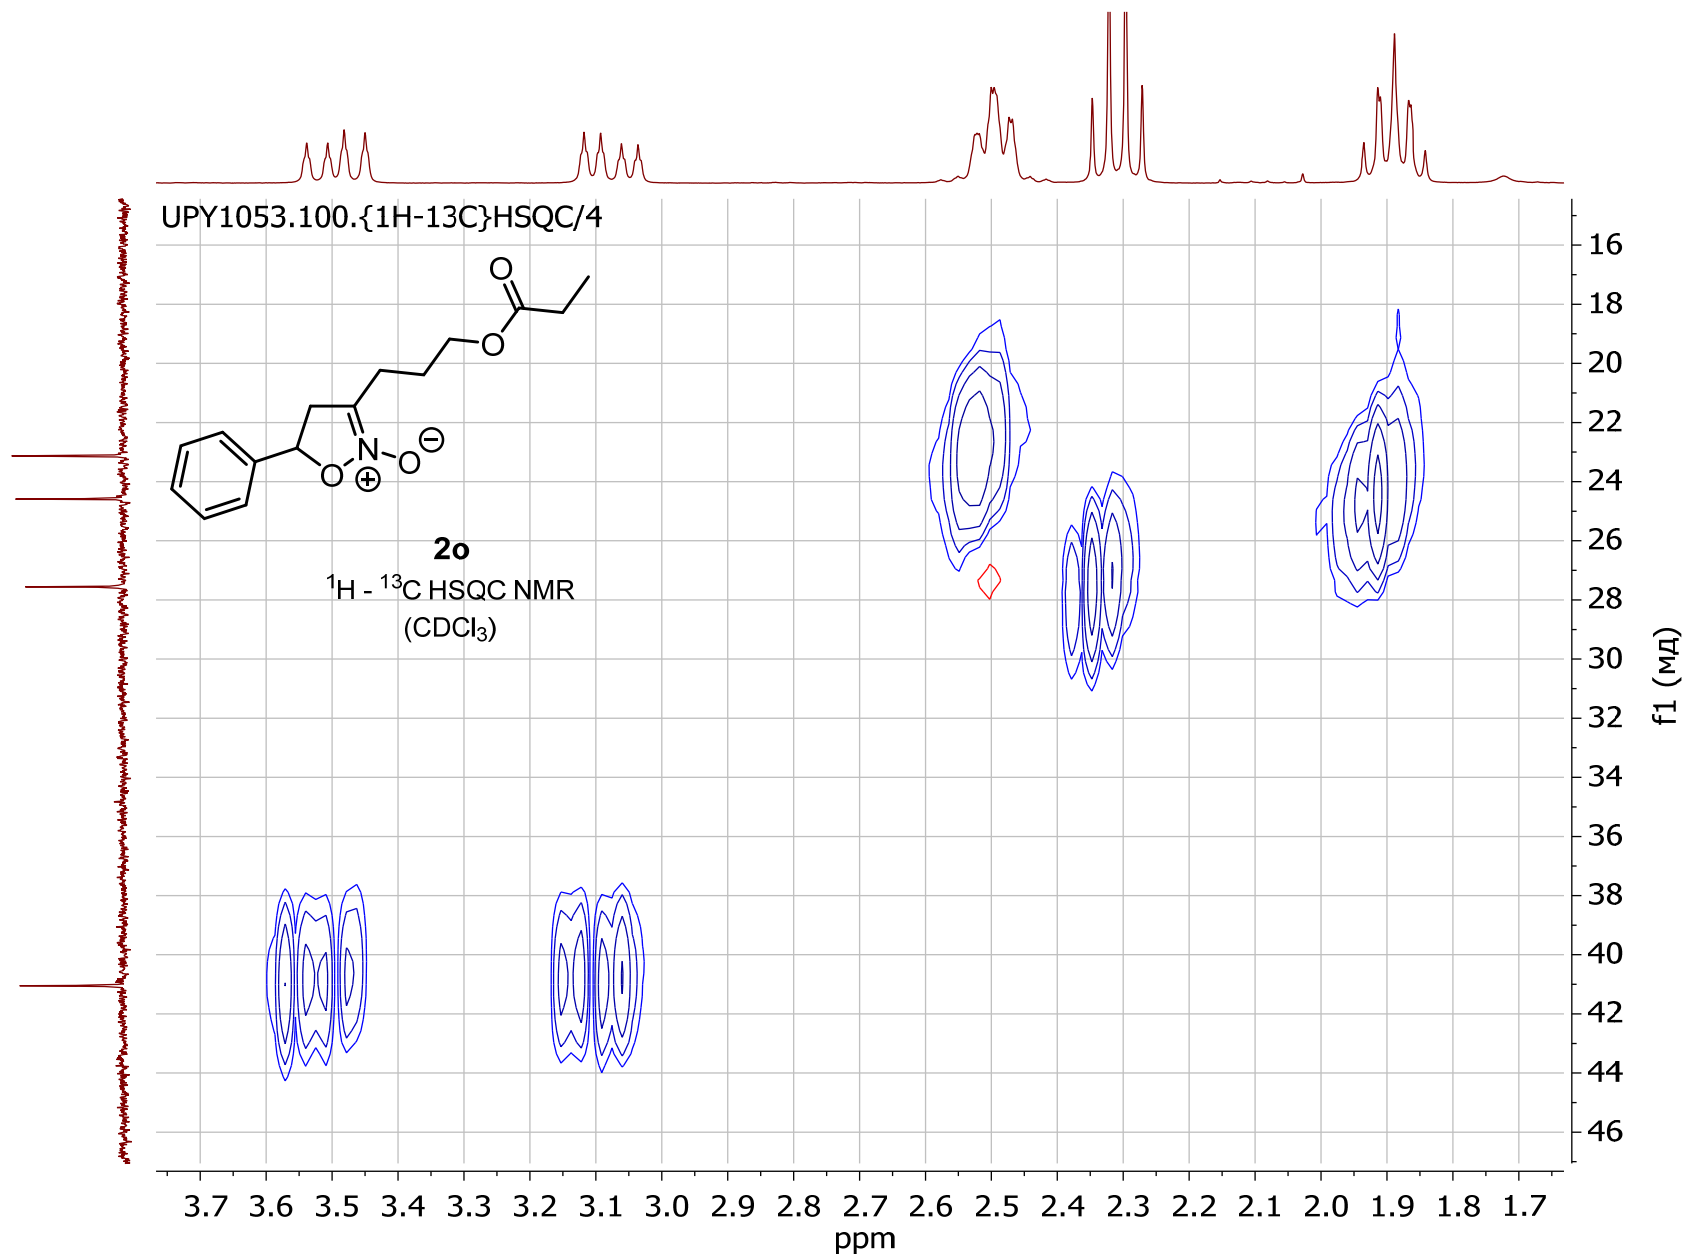

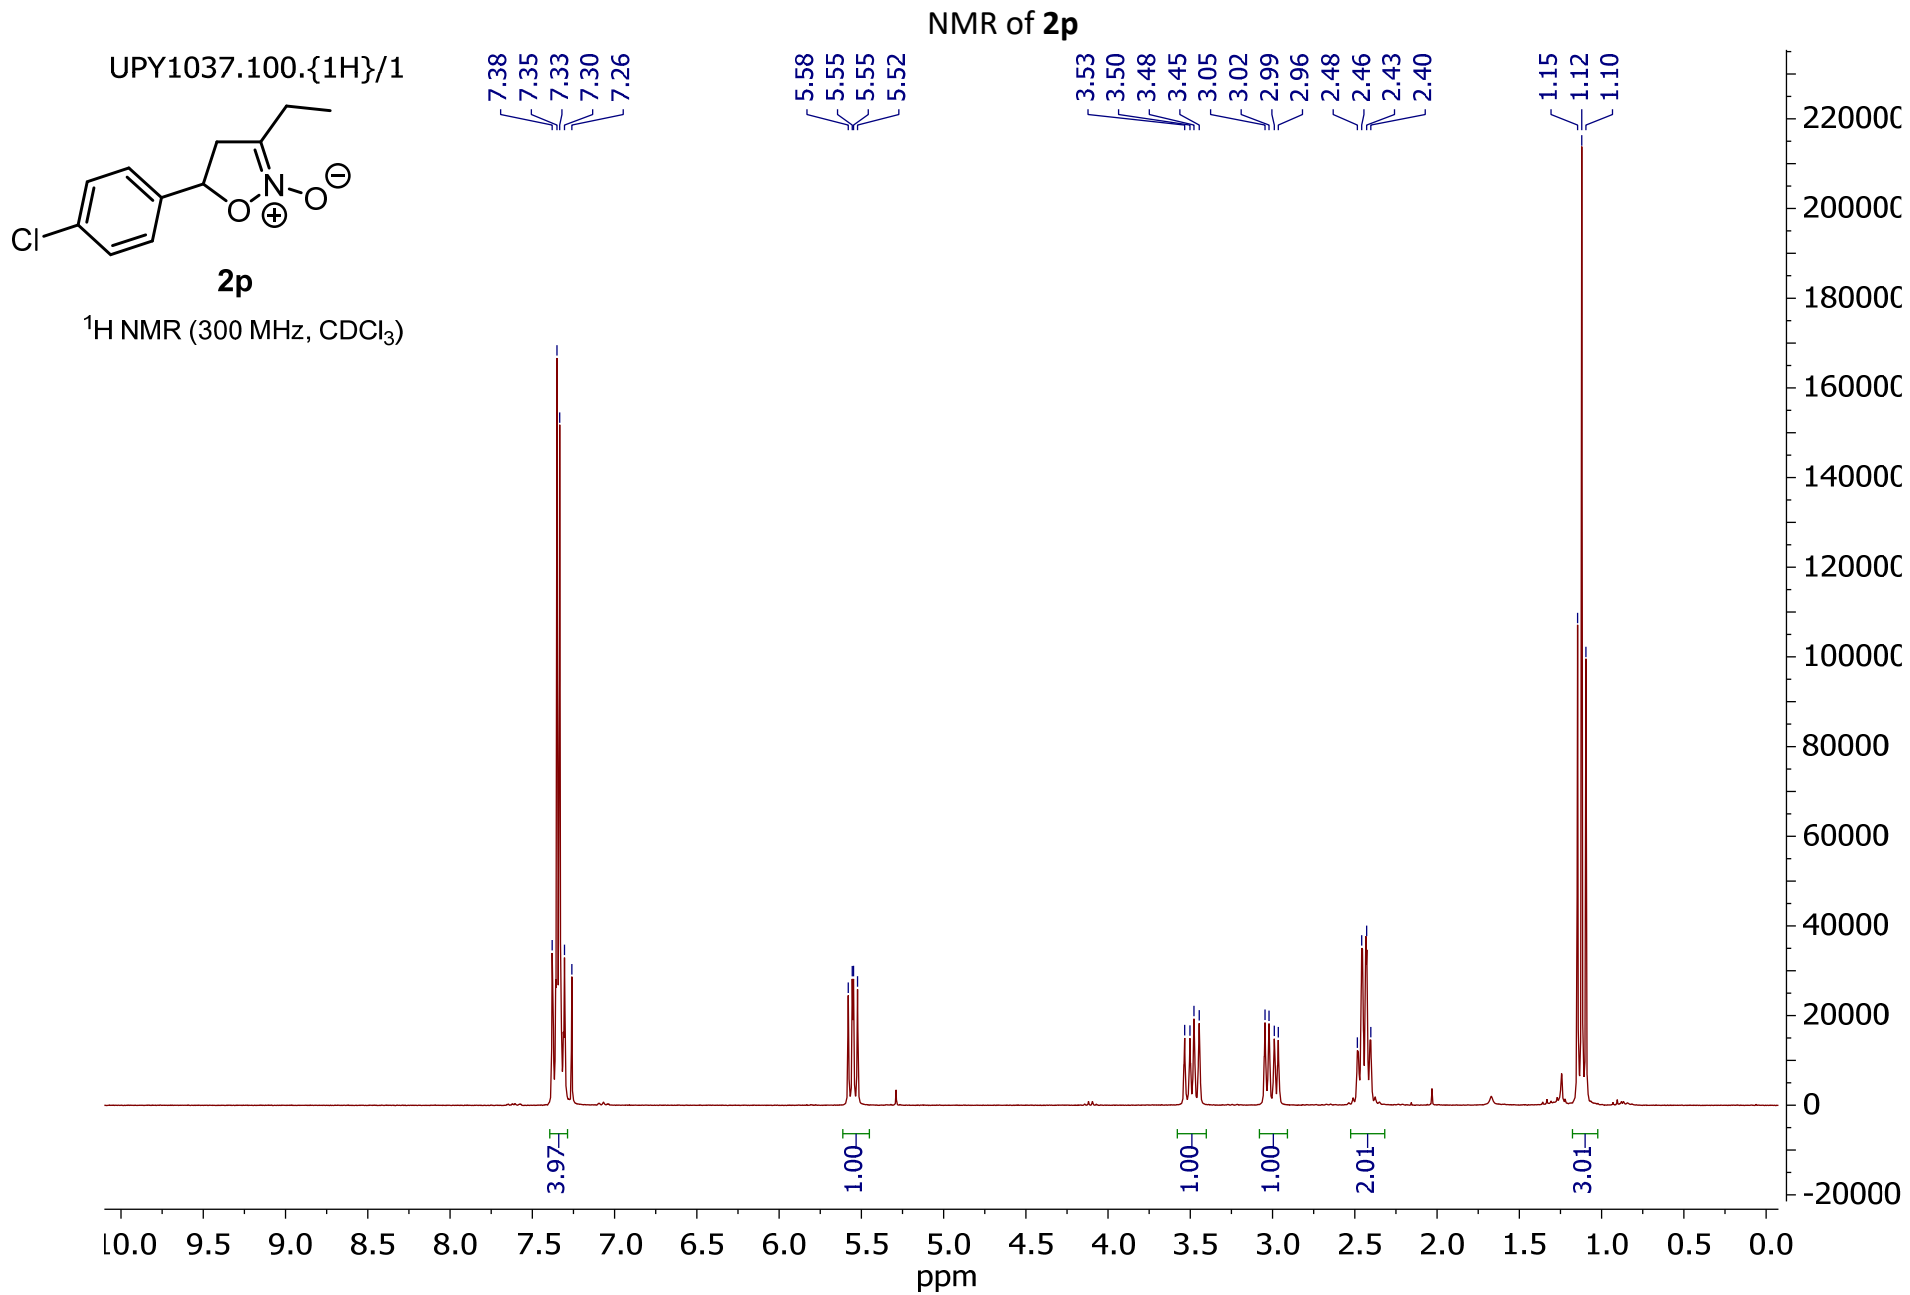



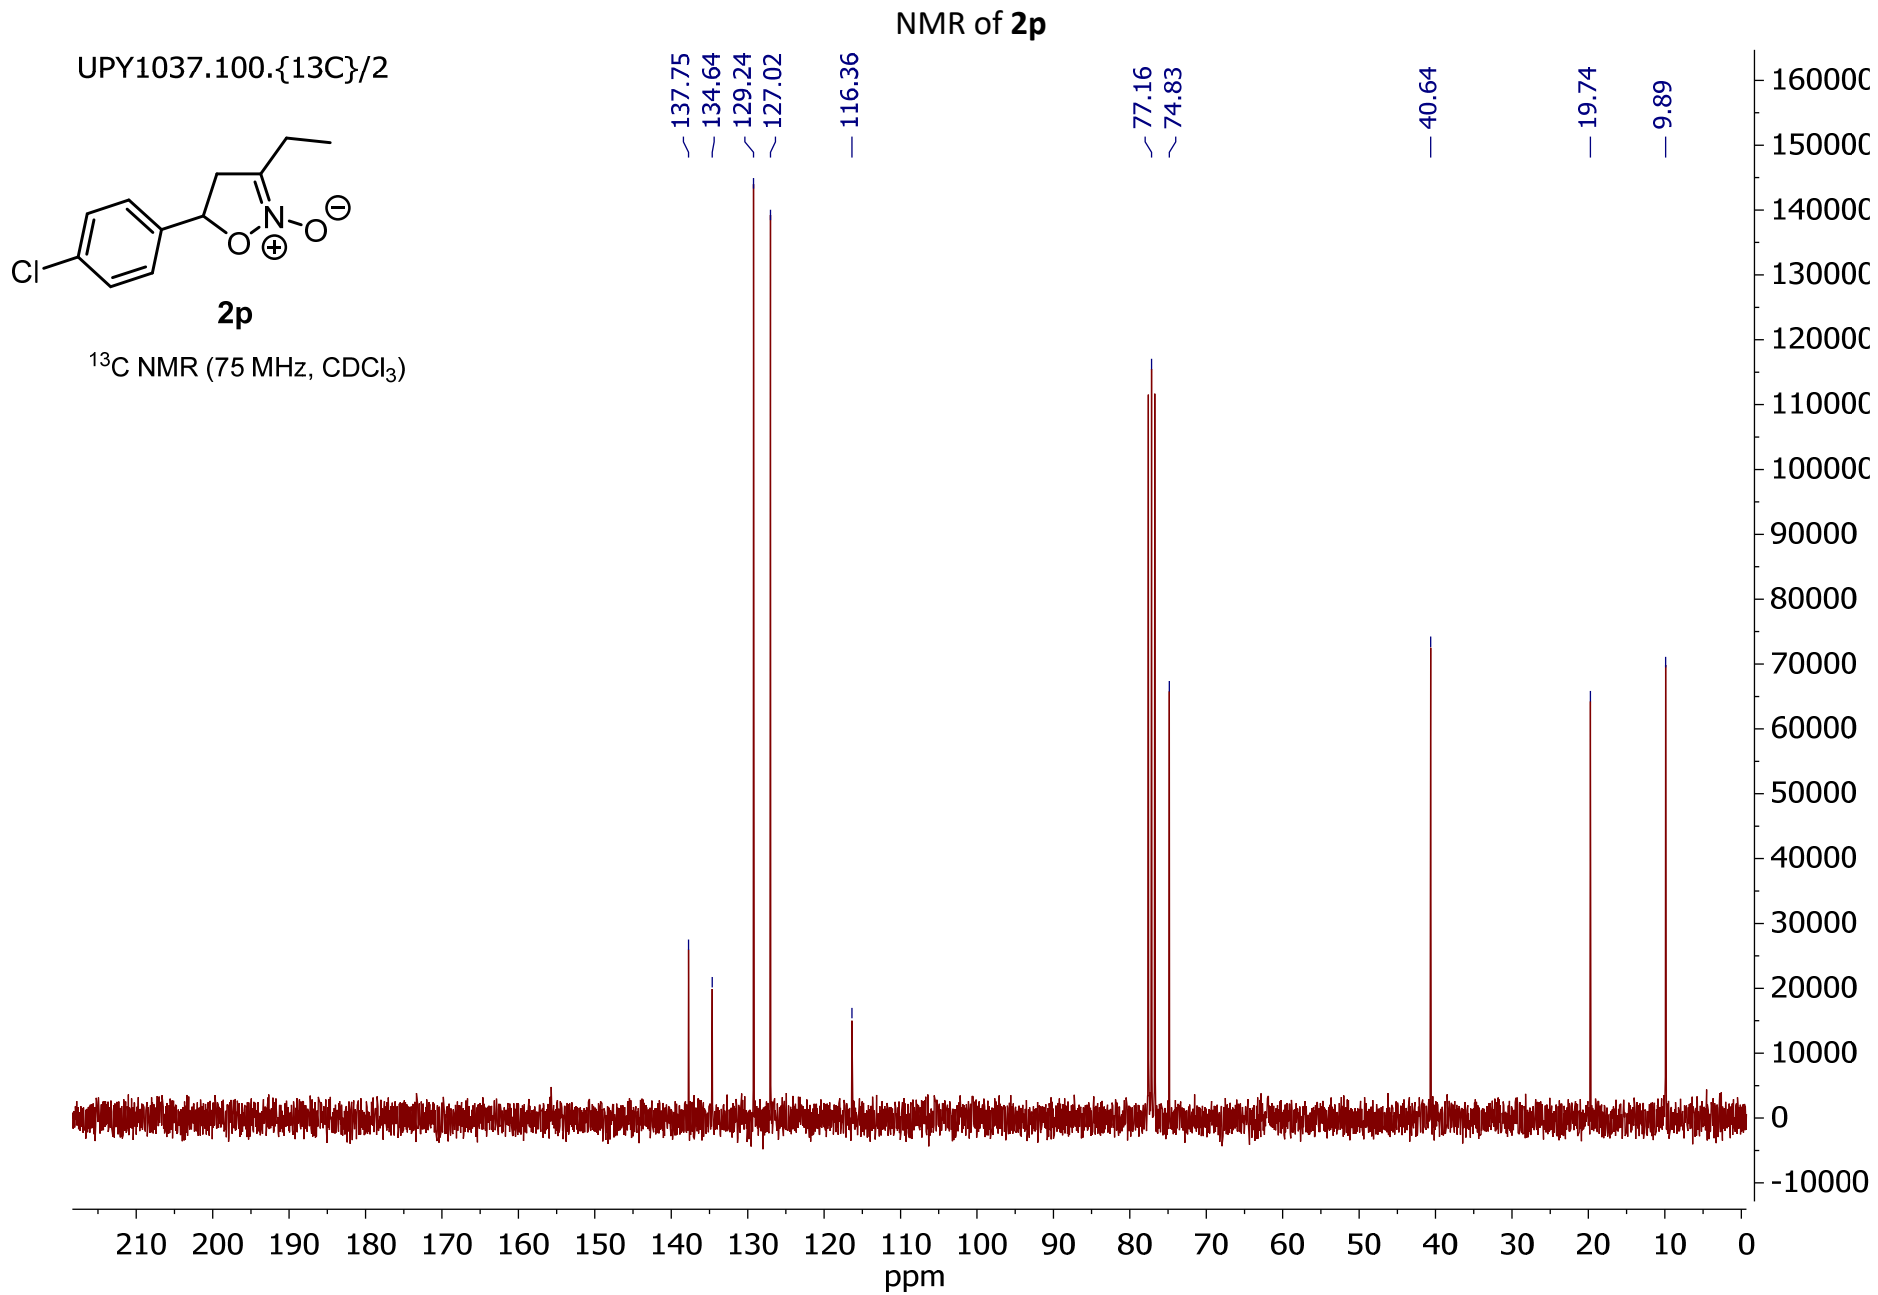

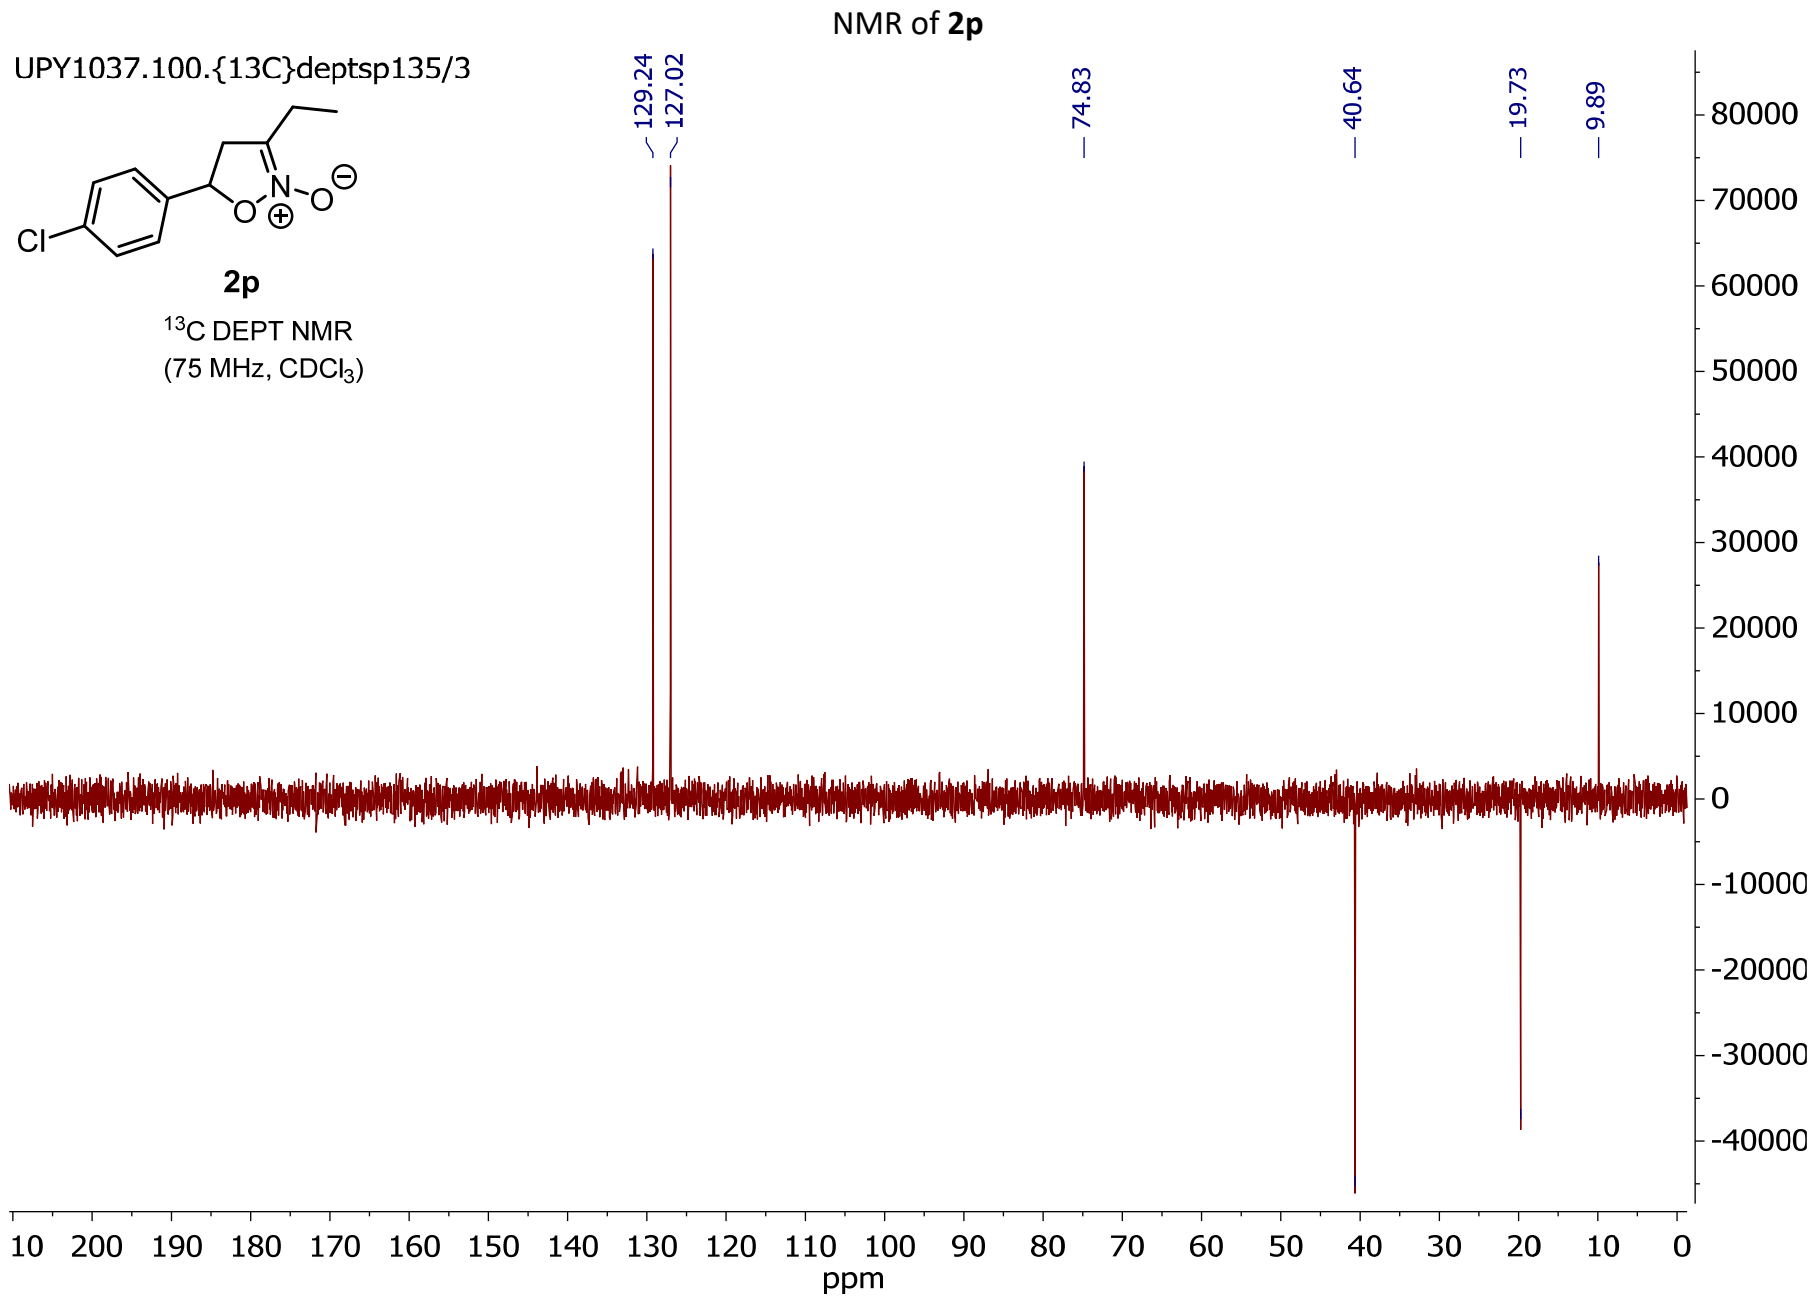

# FTIR (ATR) of 2p

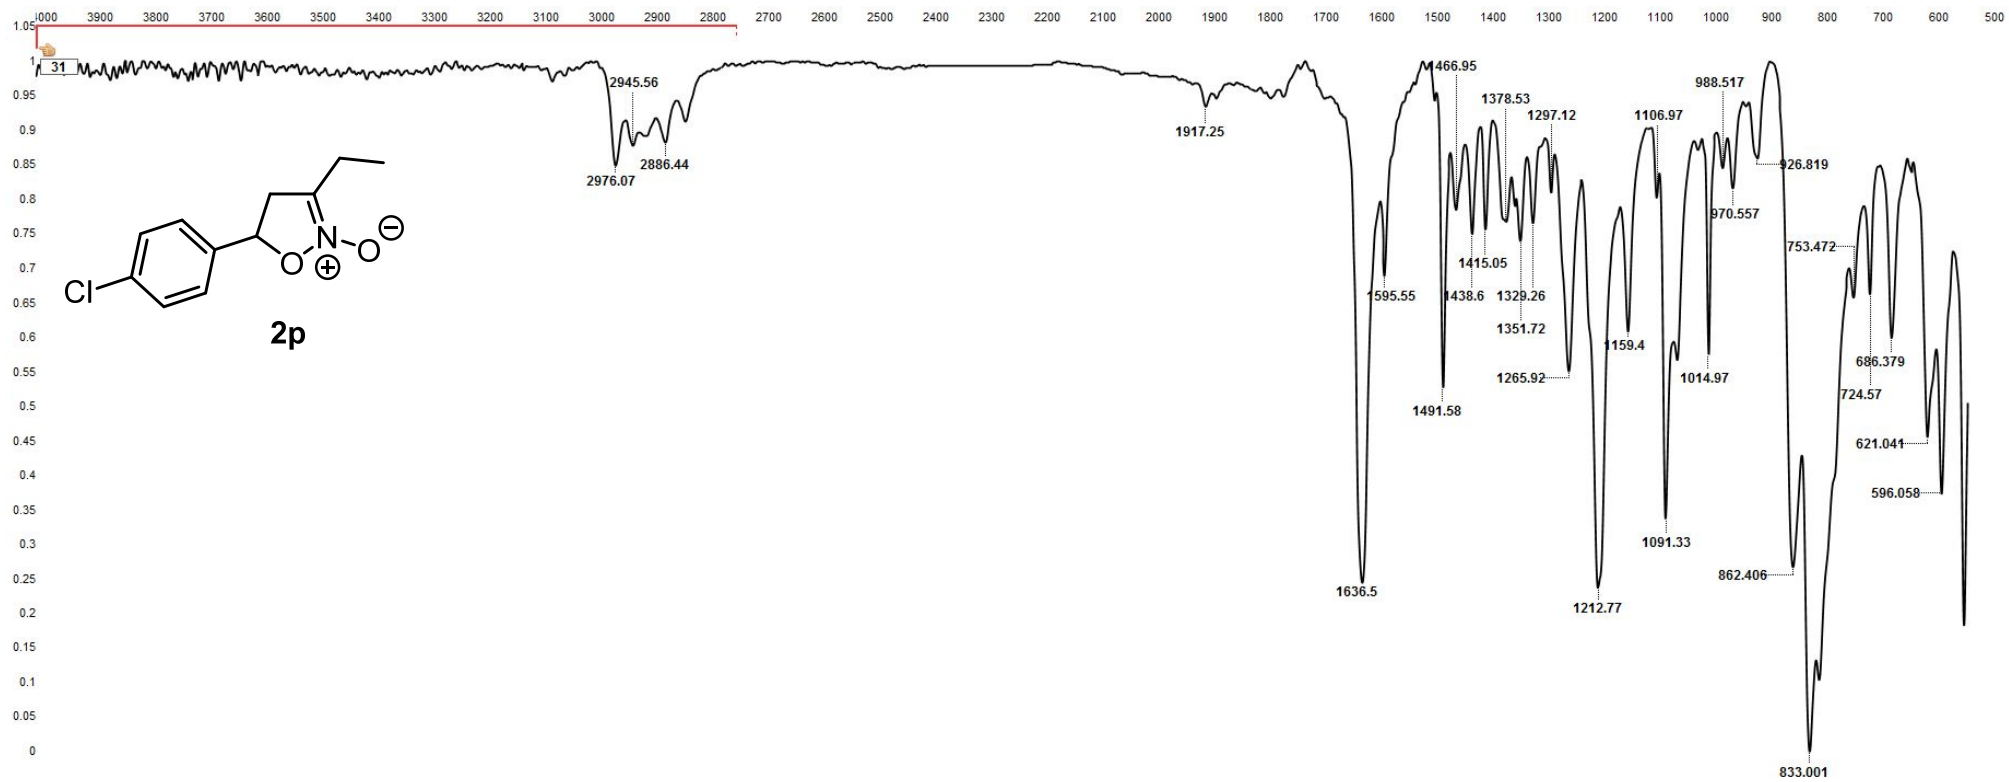

UPY1041.100.{1H}/1

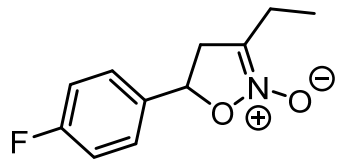

**2q**

<sup>1</sup>H NMR (300 MHz, CDCl<sub>3</sub>)

NMR of **2q**

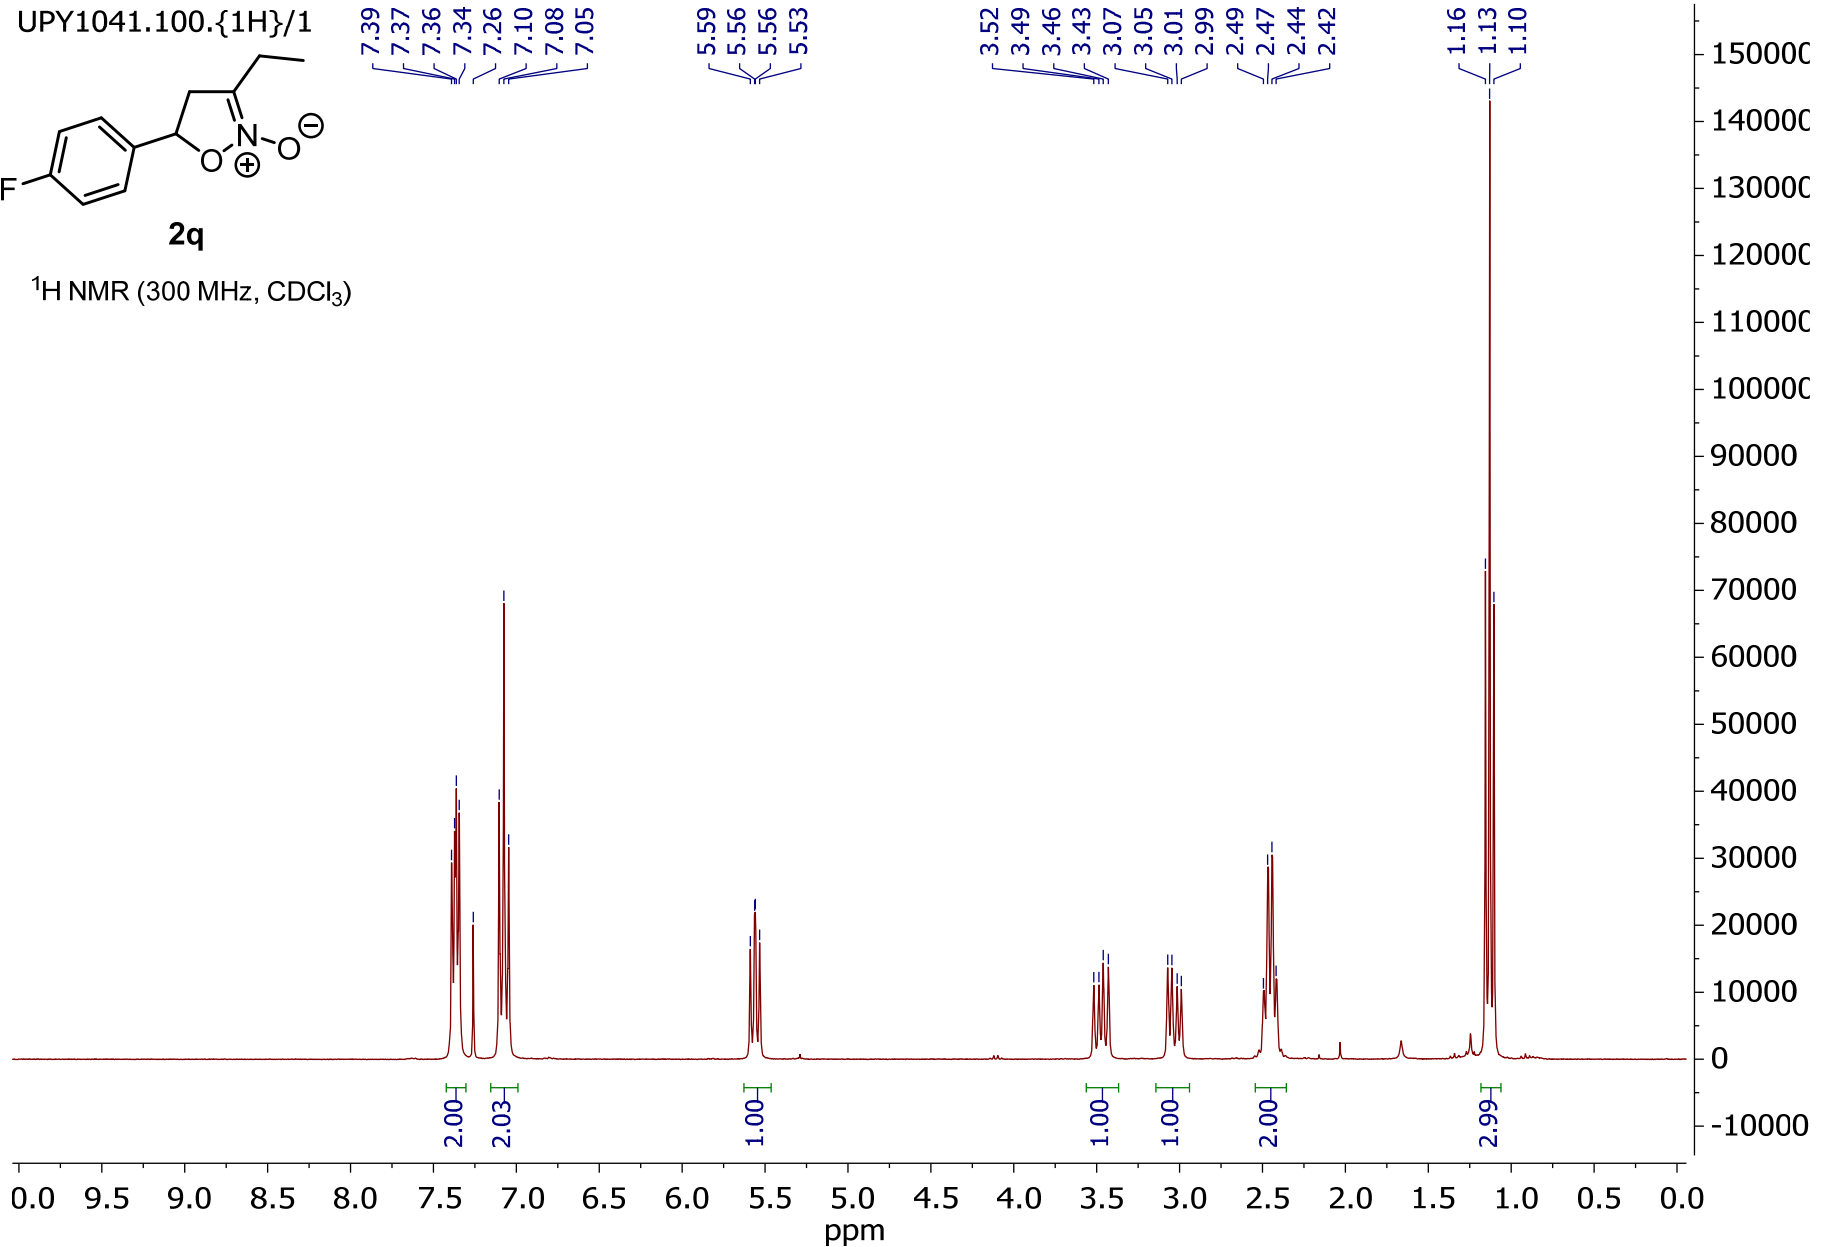

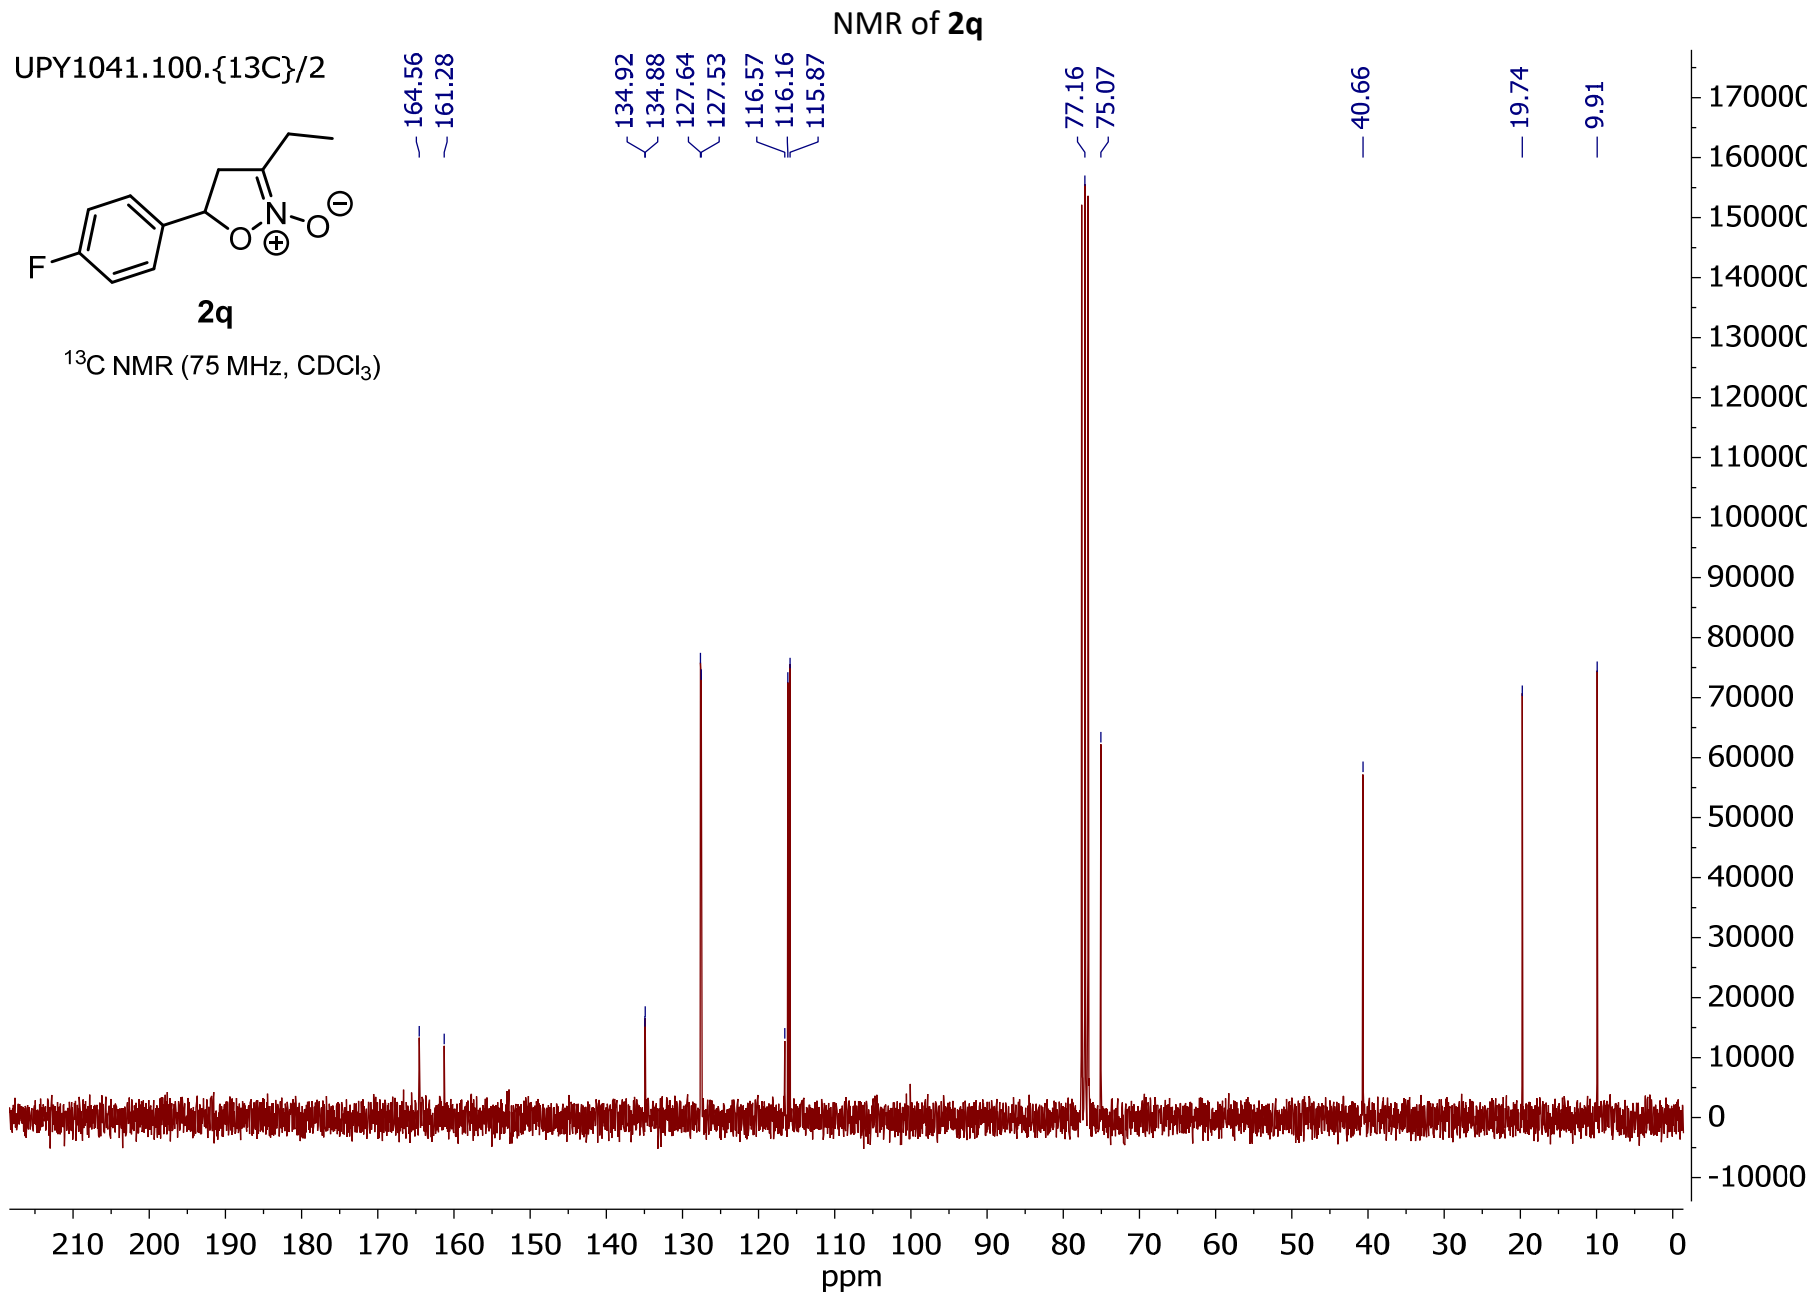

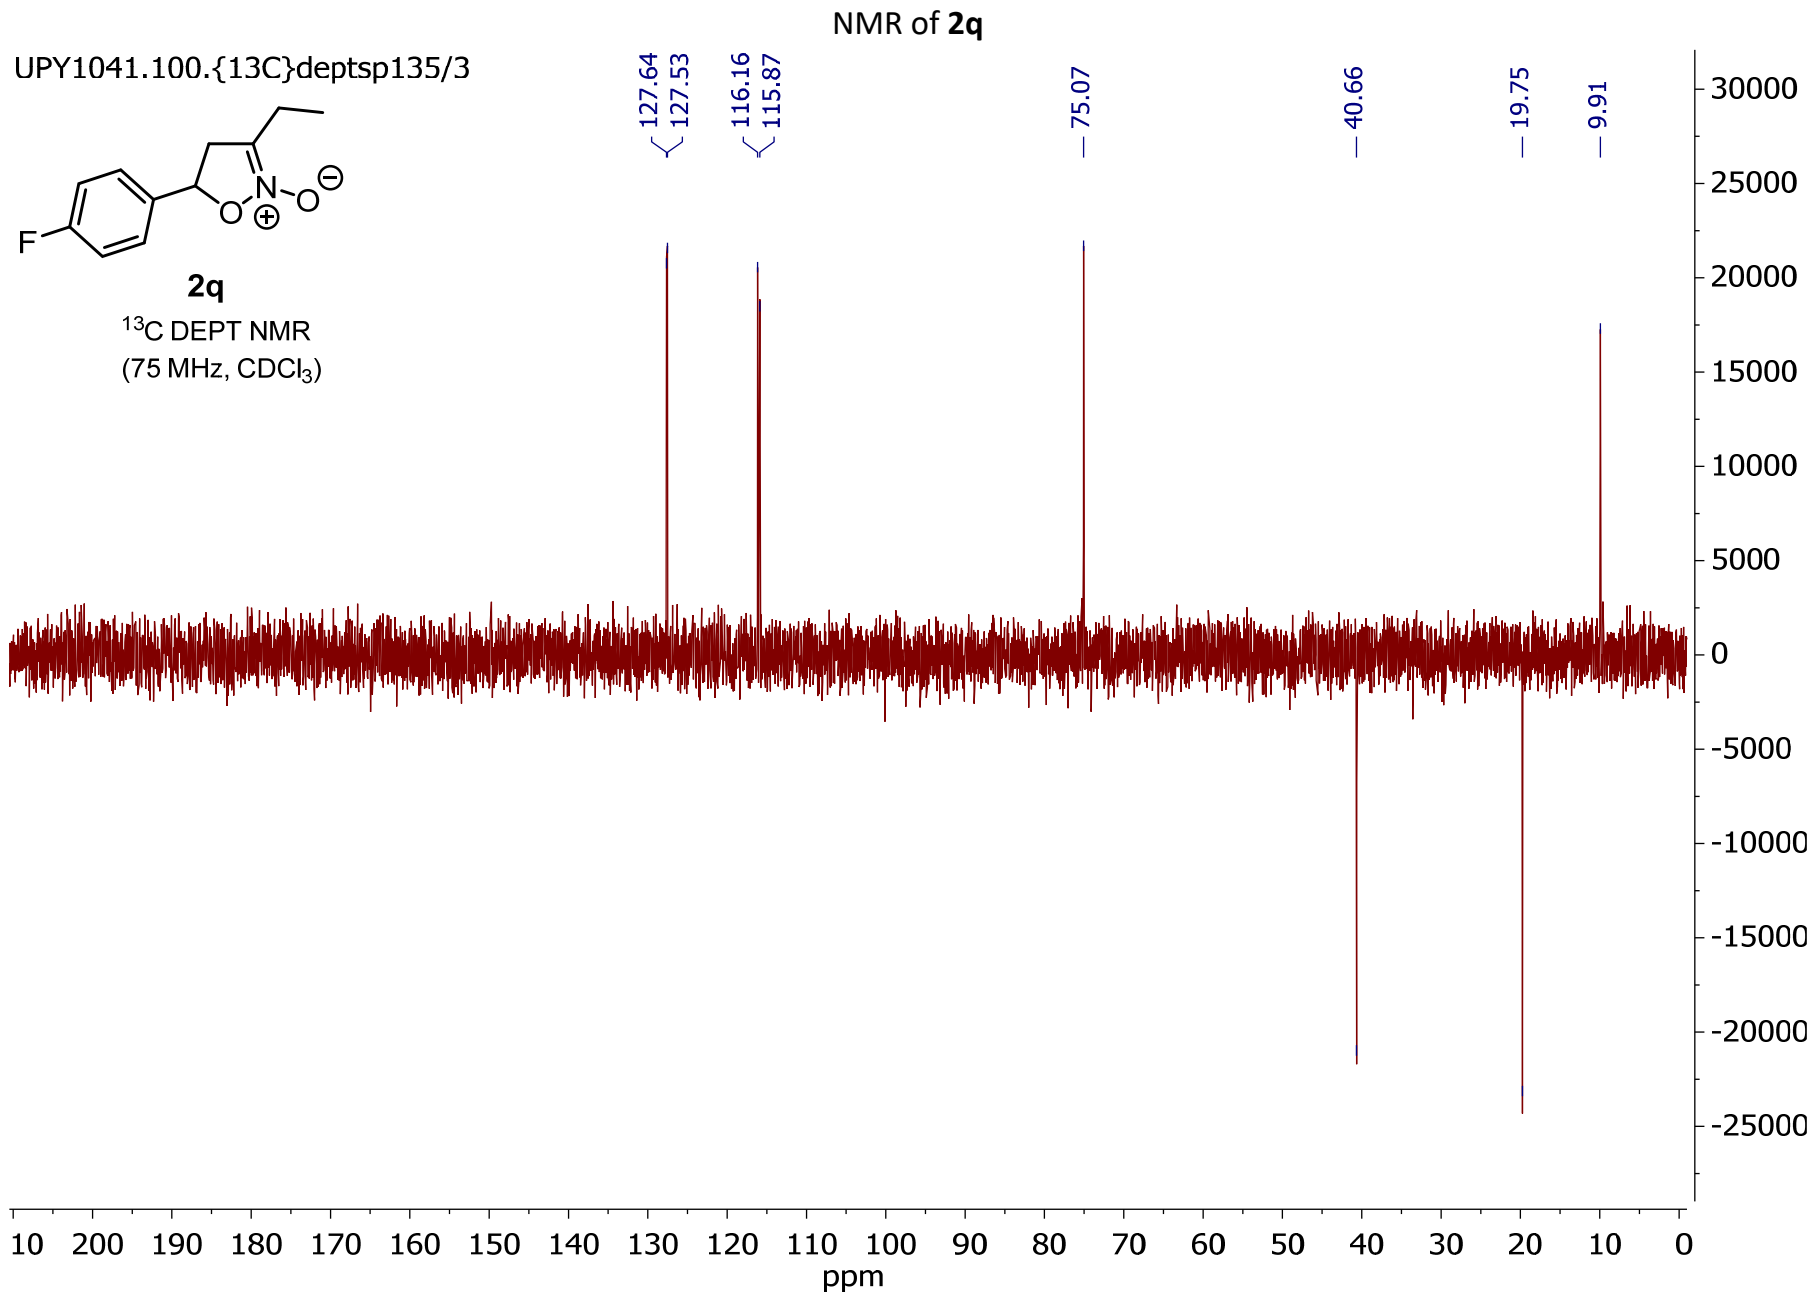

NMR of 2q

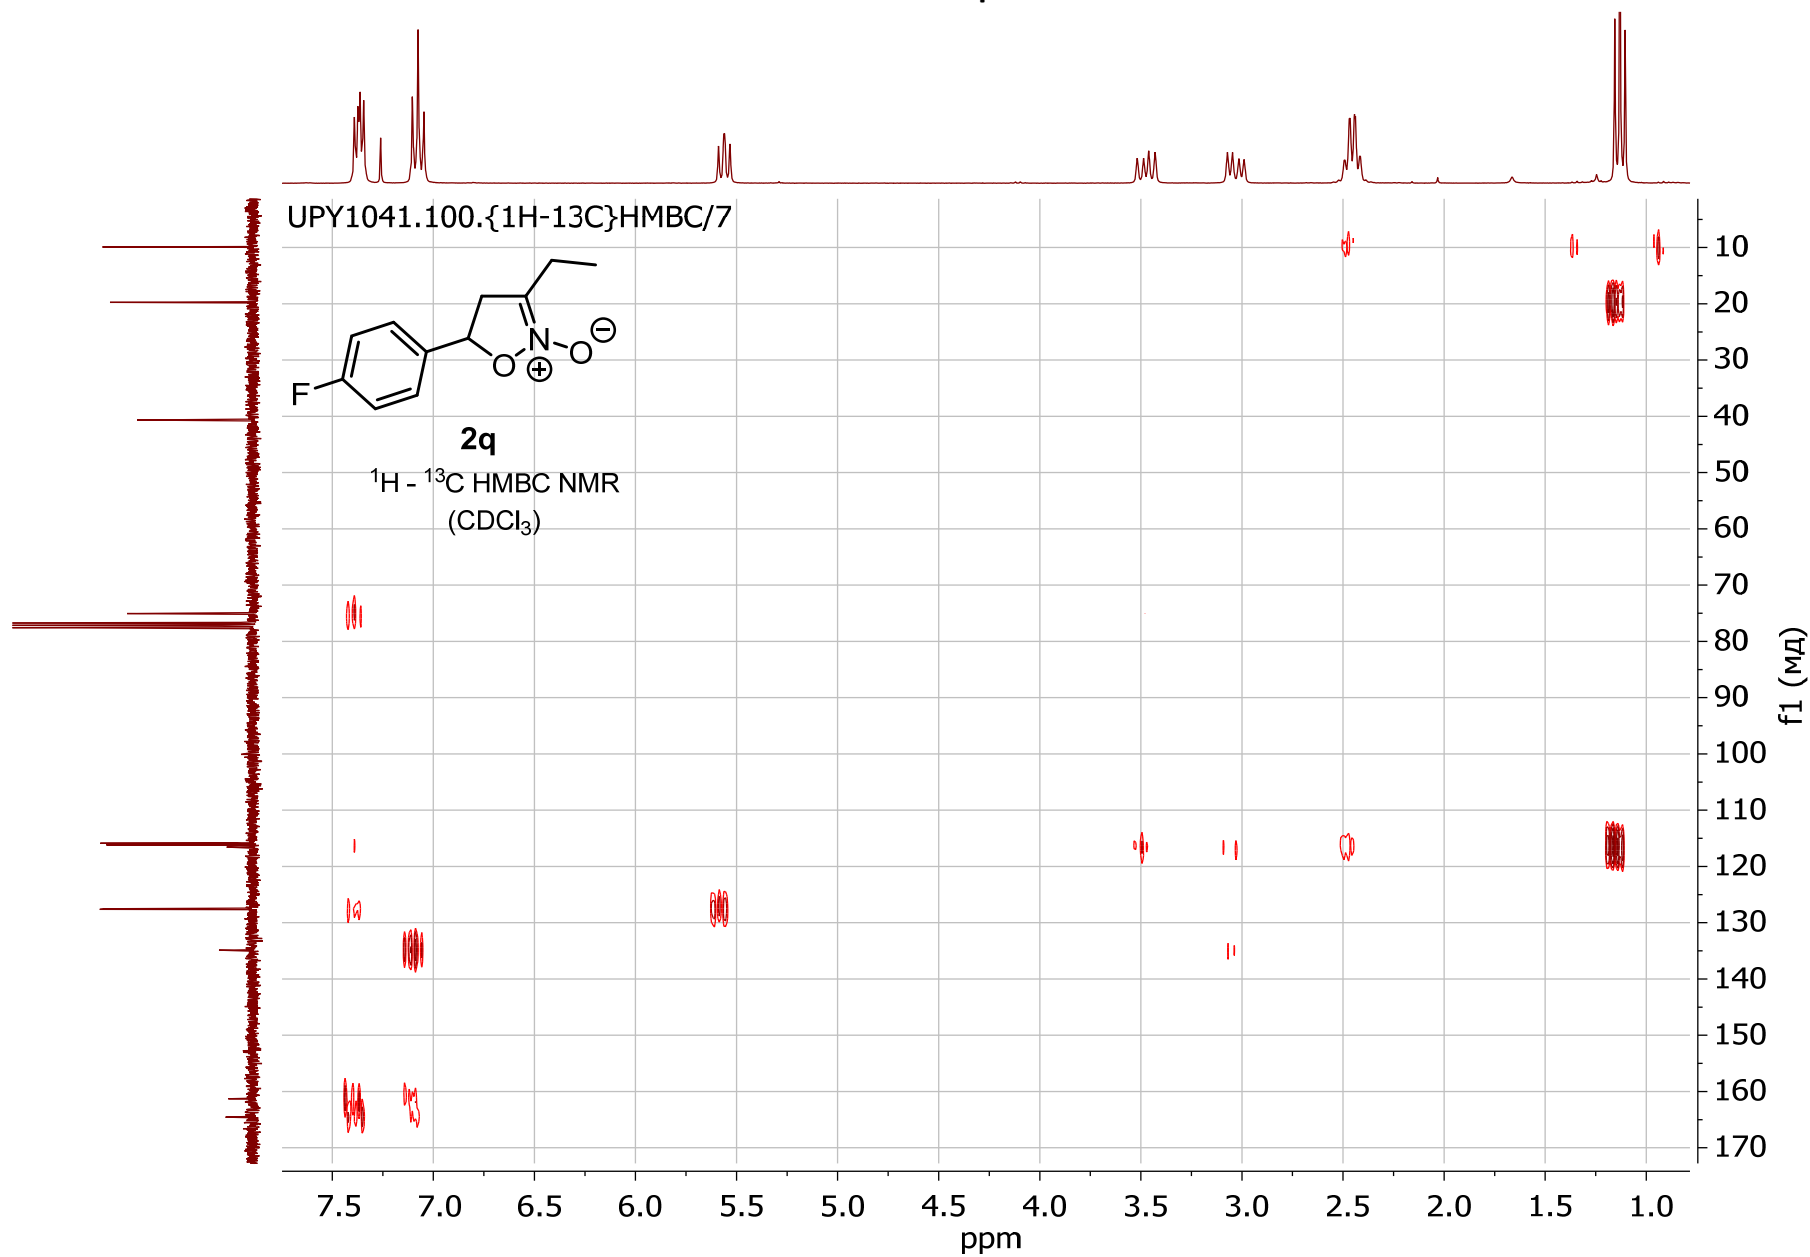

UPY1041.100.{19F}/19

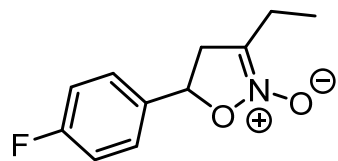

**2q**

<sup>19</sup>F NMR (282 MHz, CDCl<sub>3</sub>)

NMR of **2q**

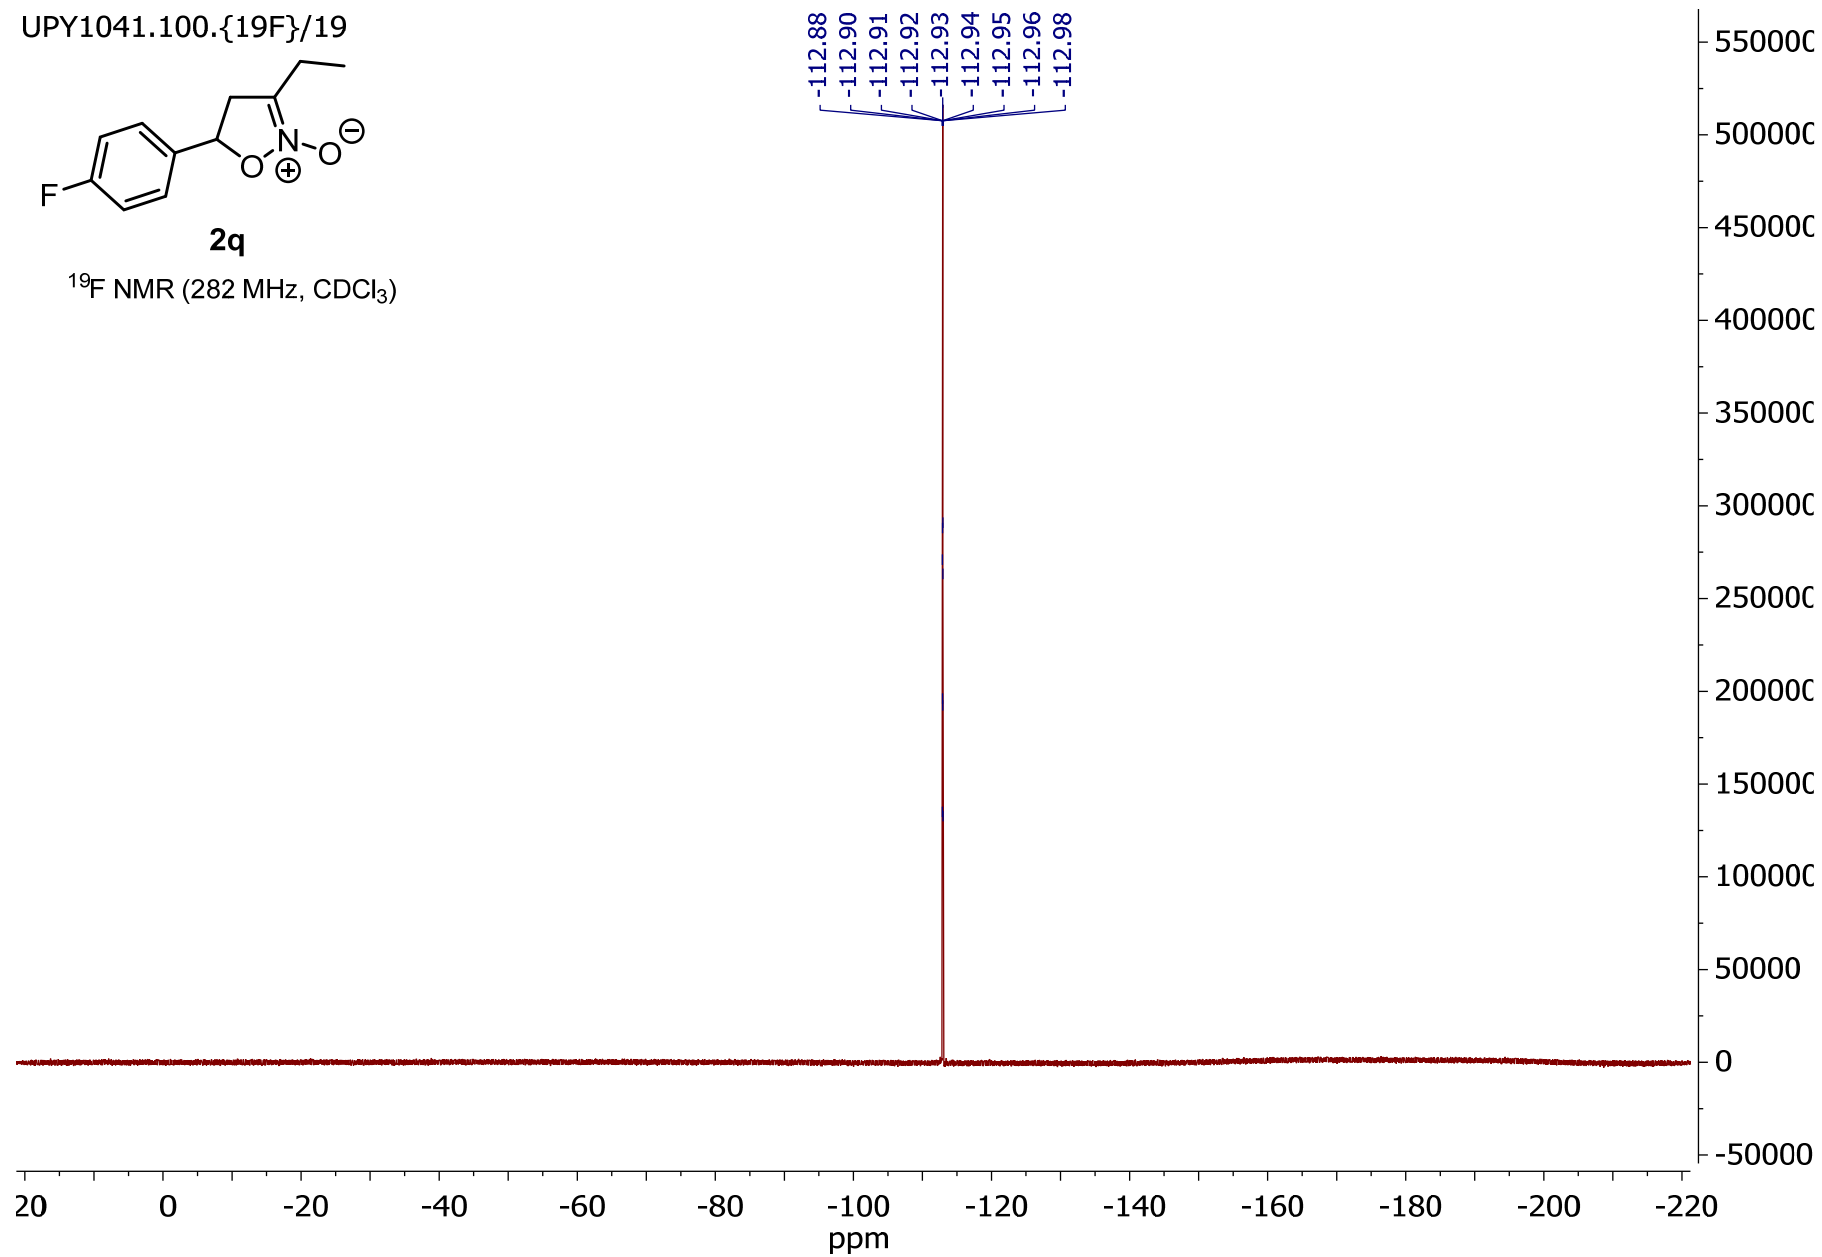



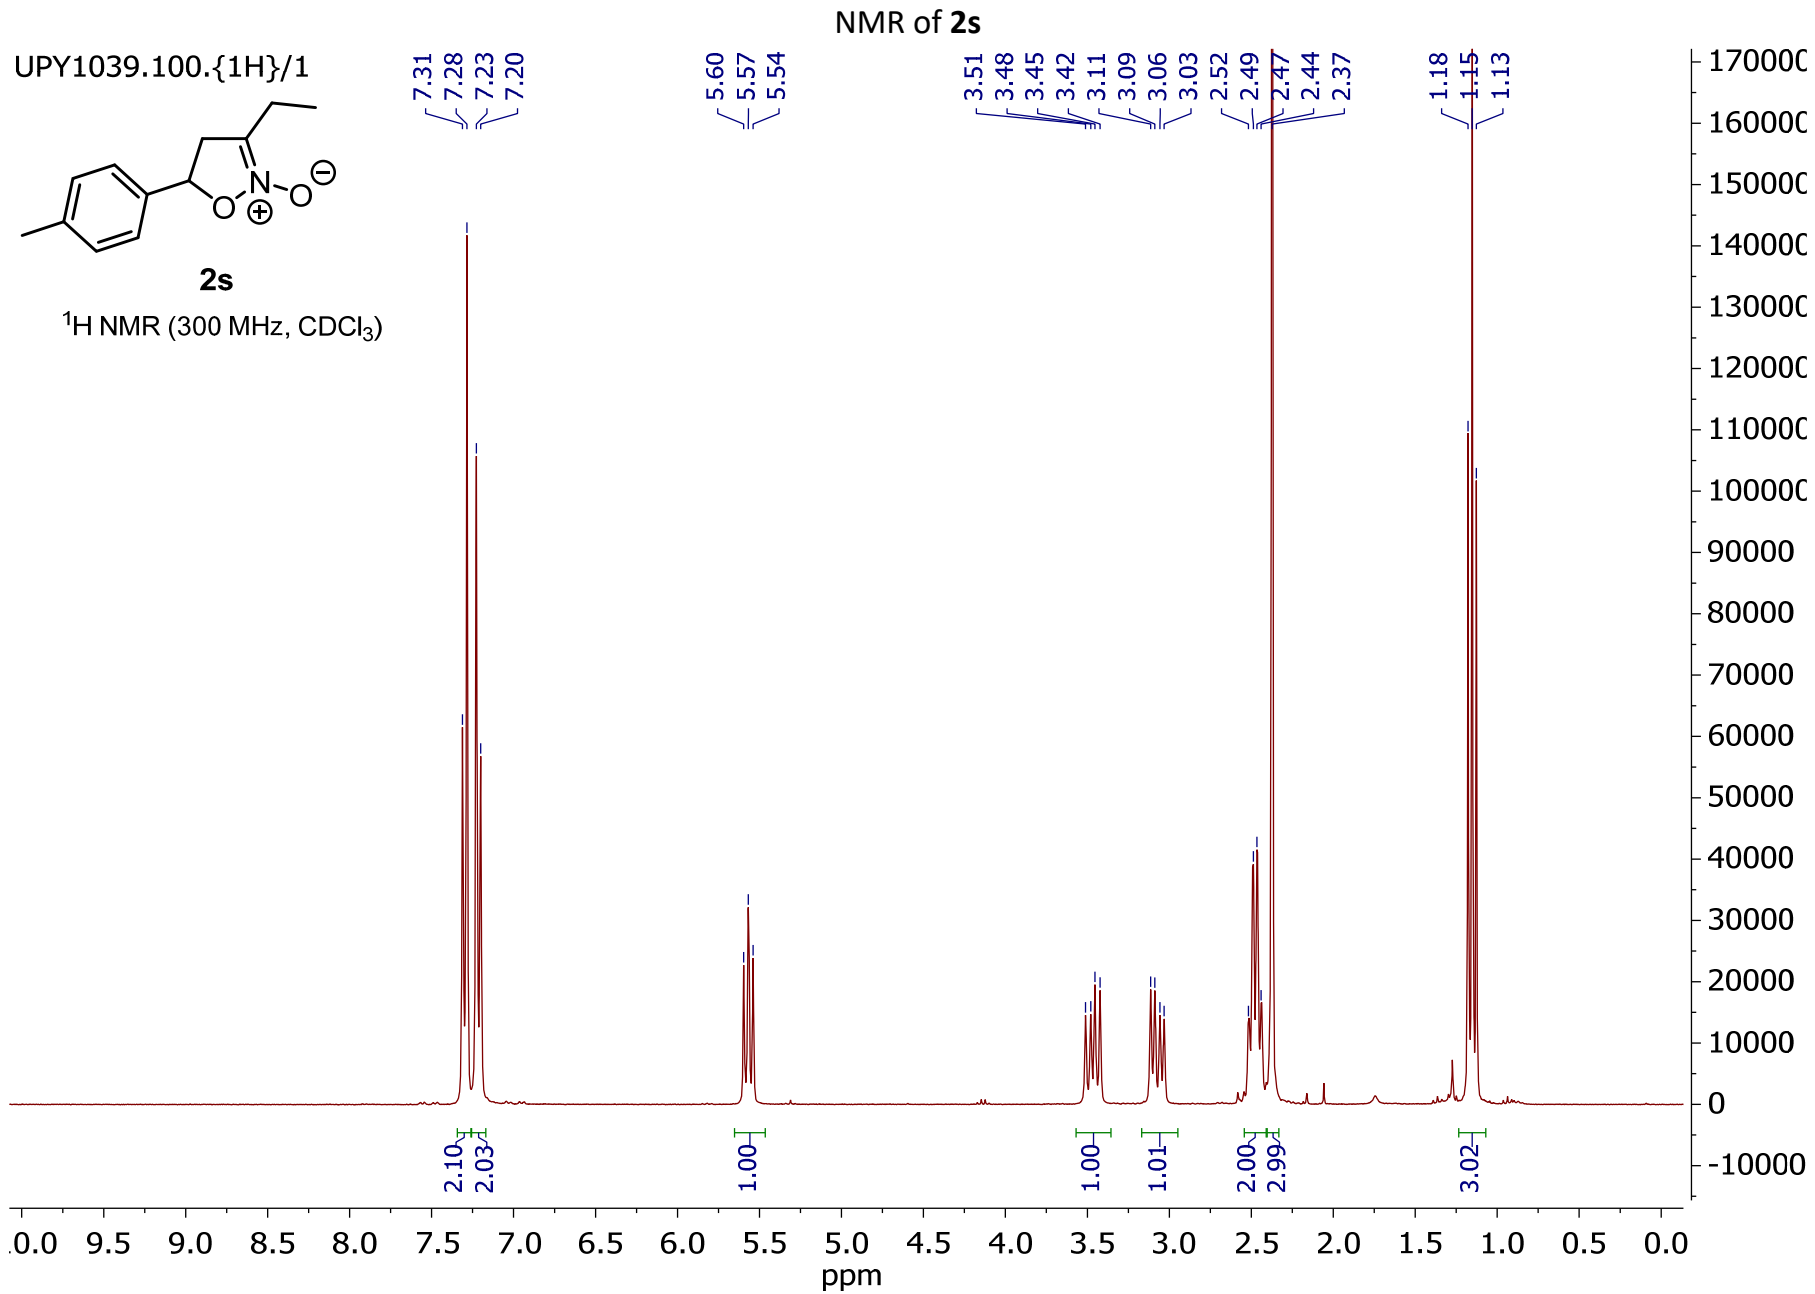

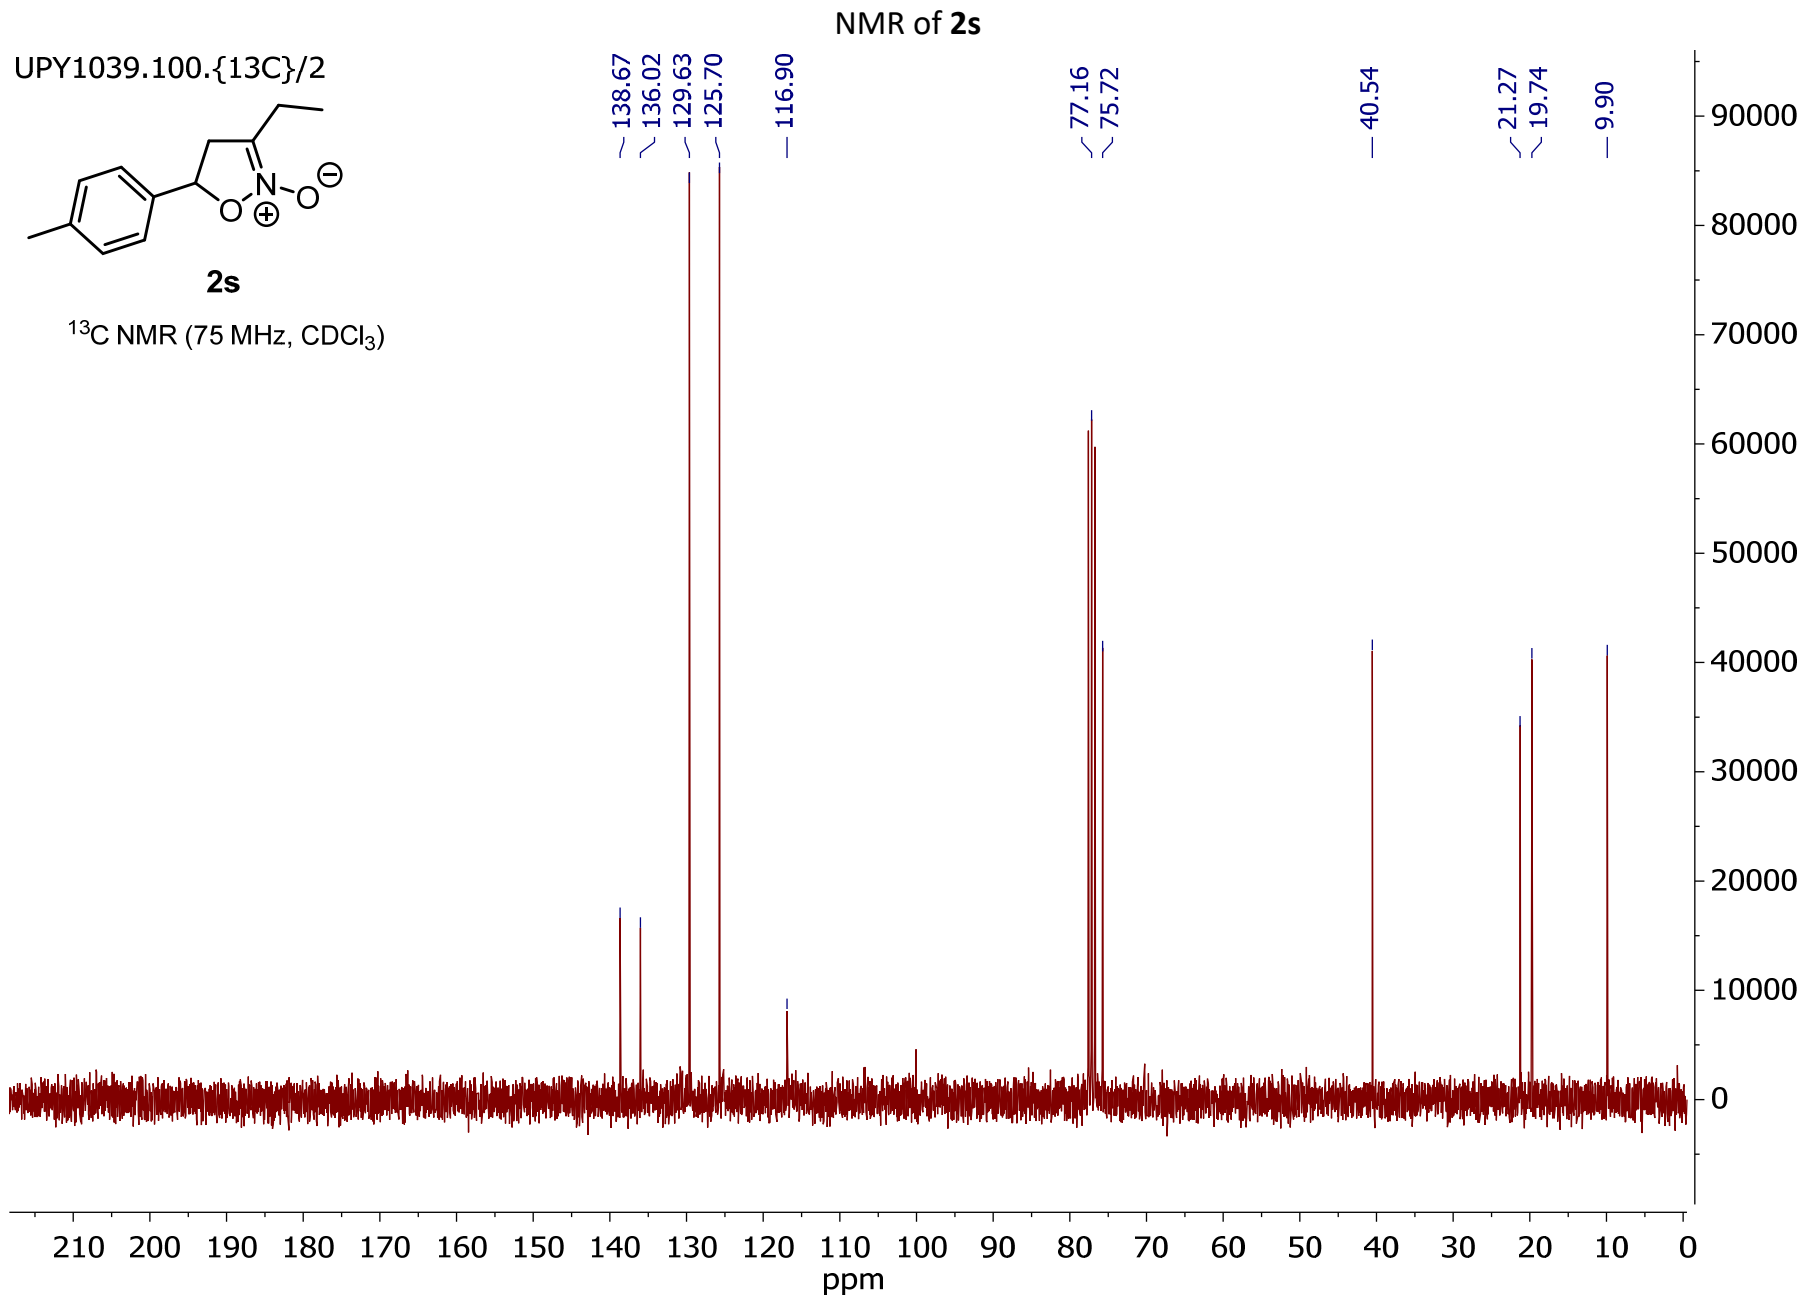

UPY1039.100.{13C}depts135/3

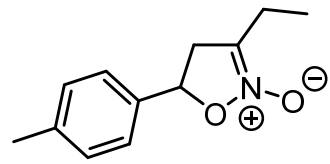

**2s**

<sup>13</sup>C DEPT NMR  
(75 MHz, CDCl<sub>3</sub>)

NMR of **2s**

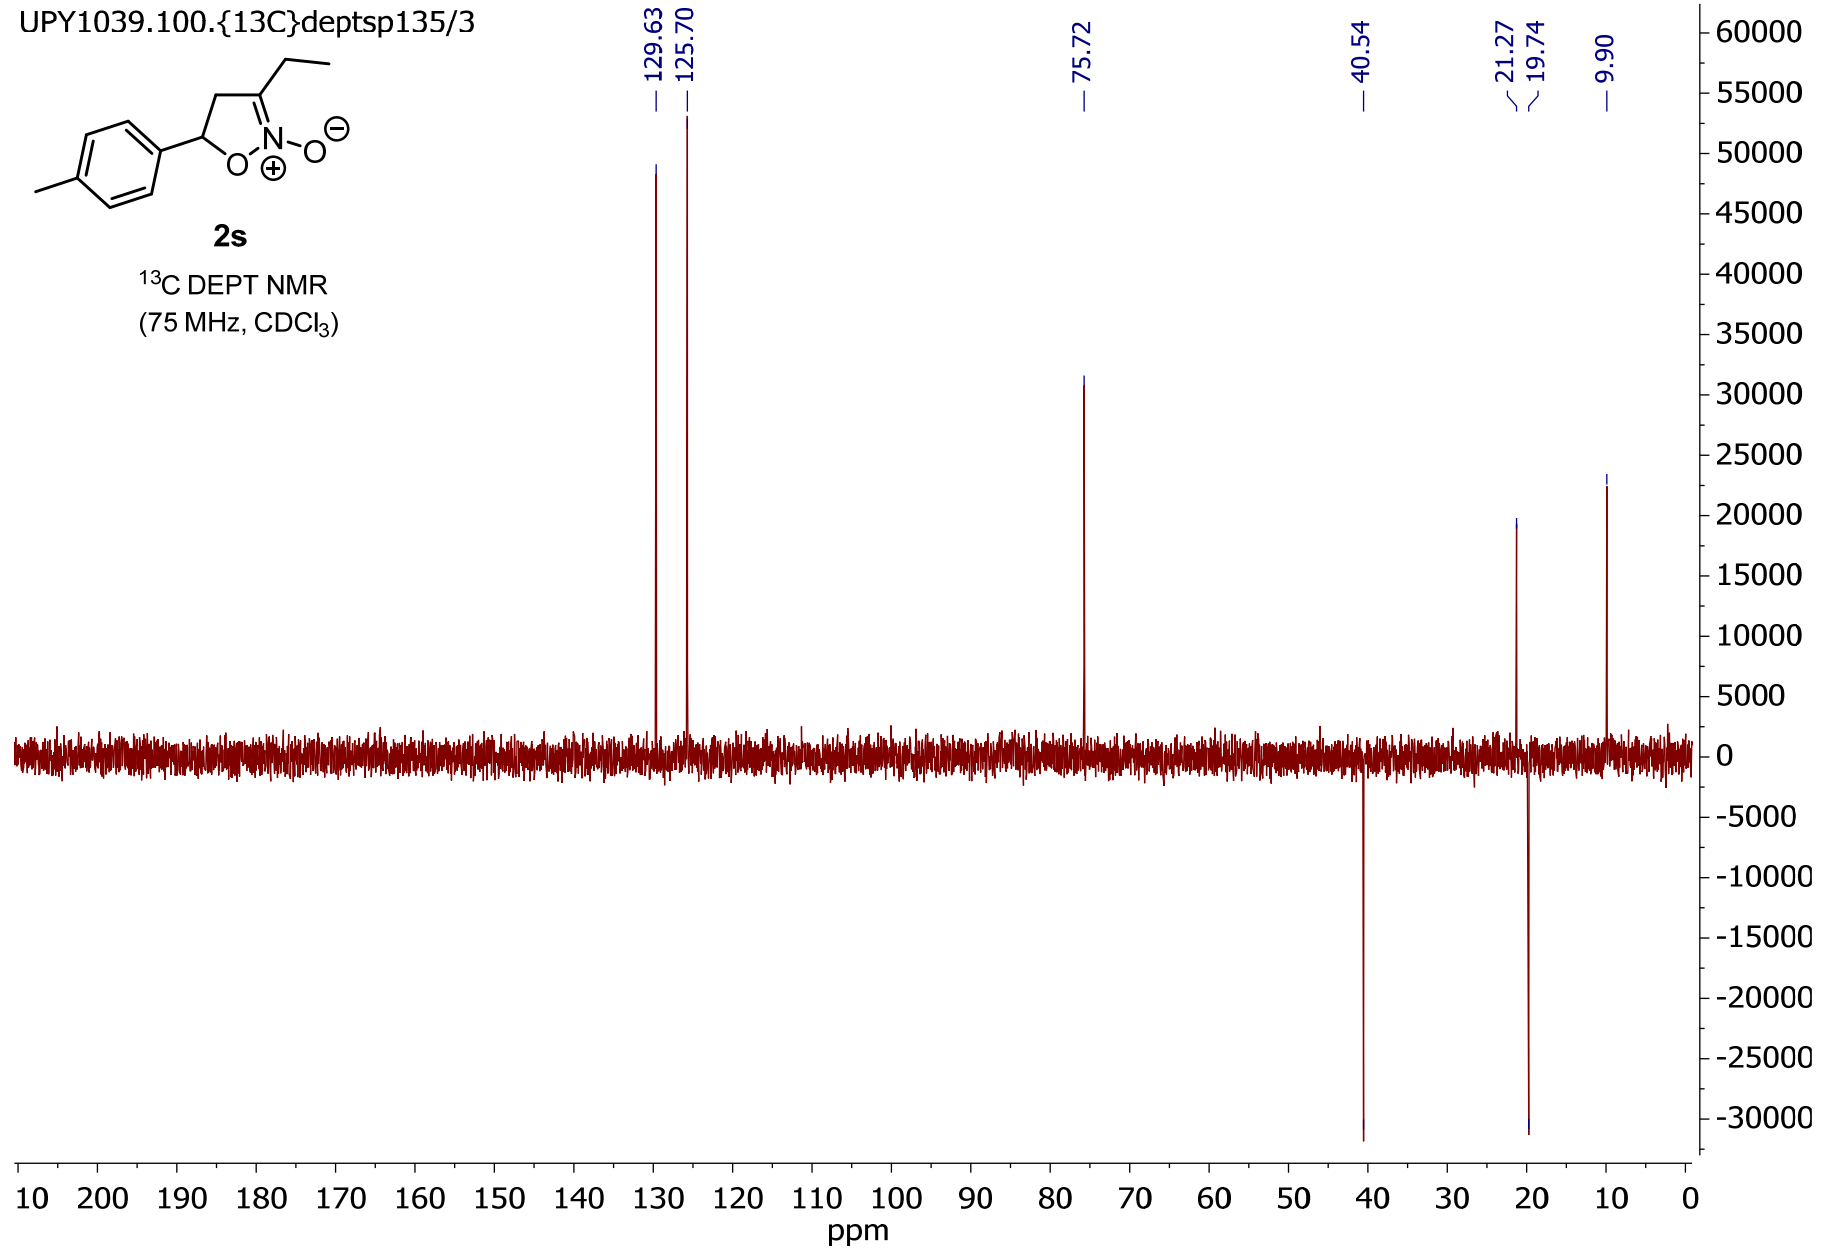

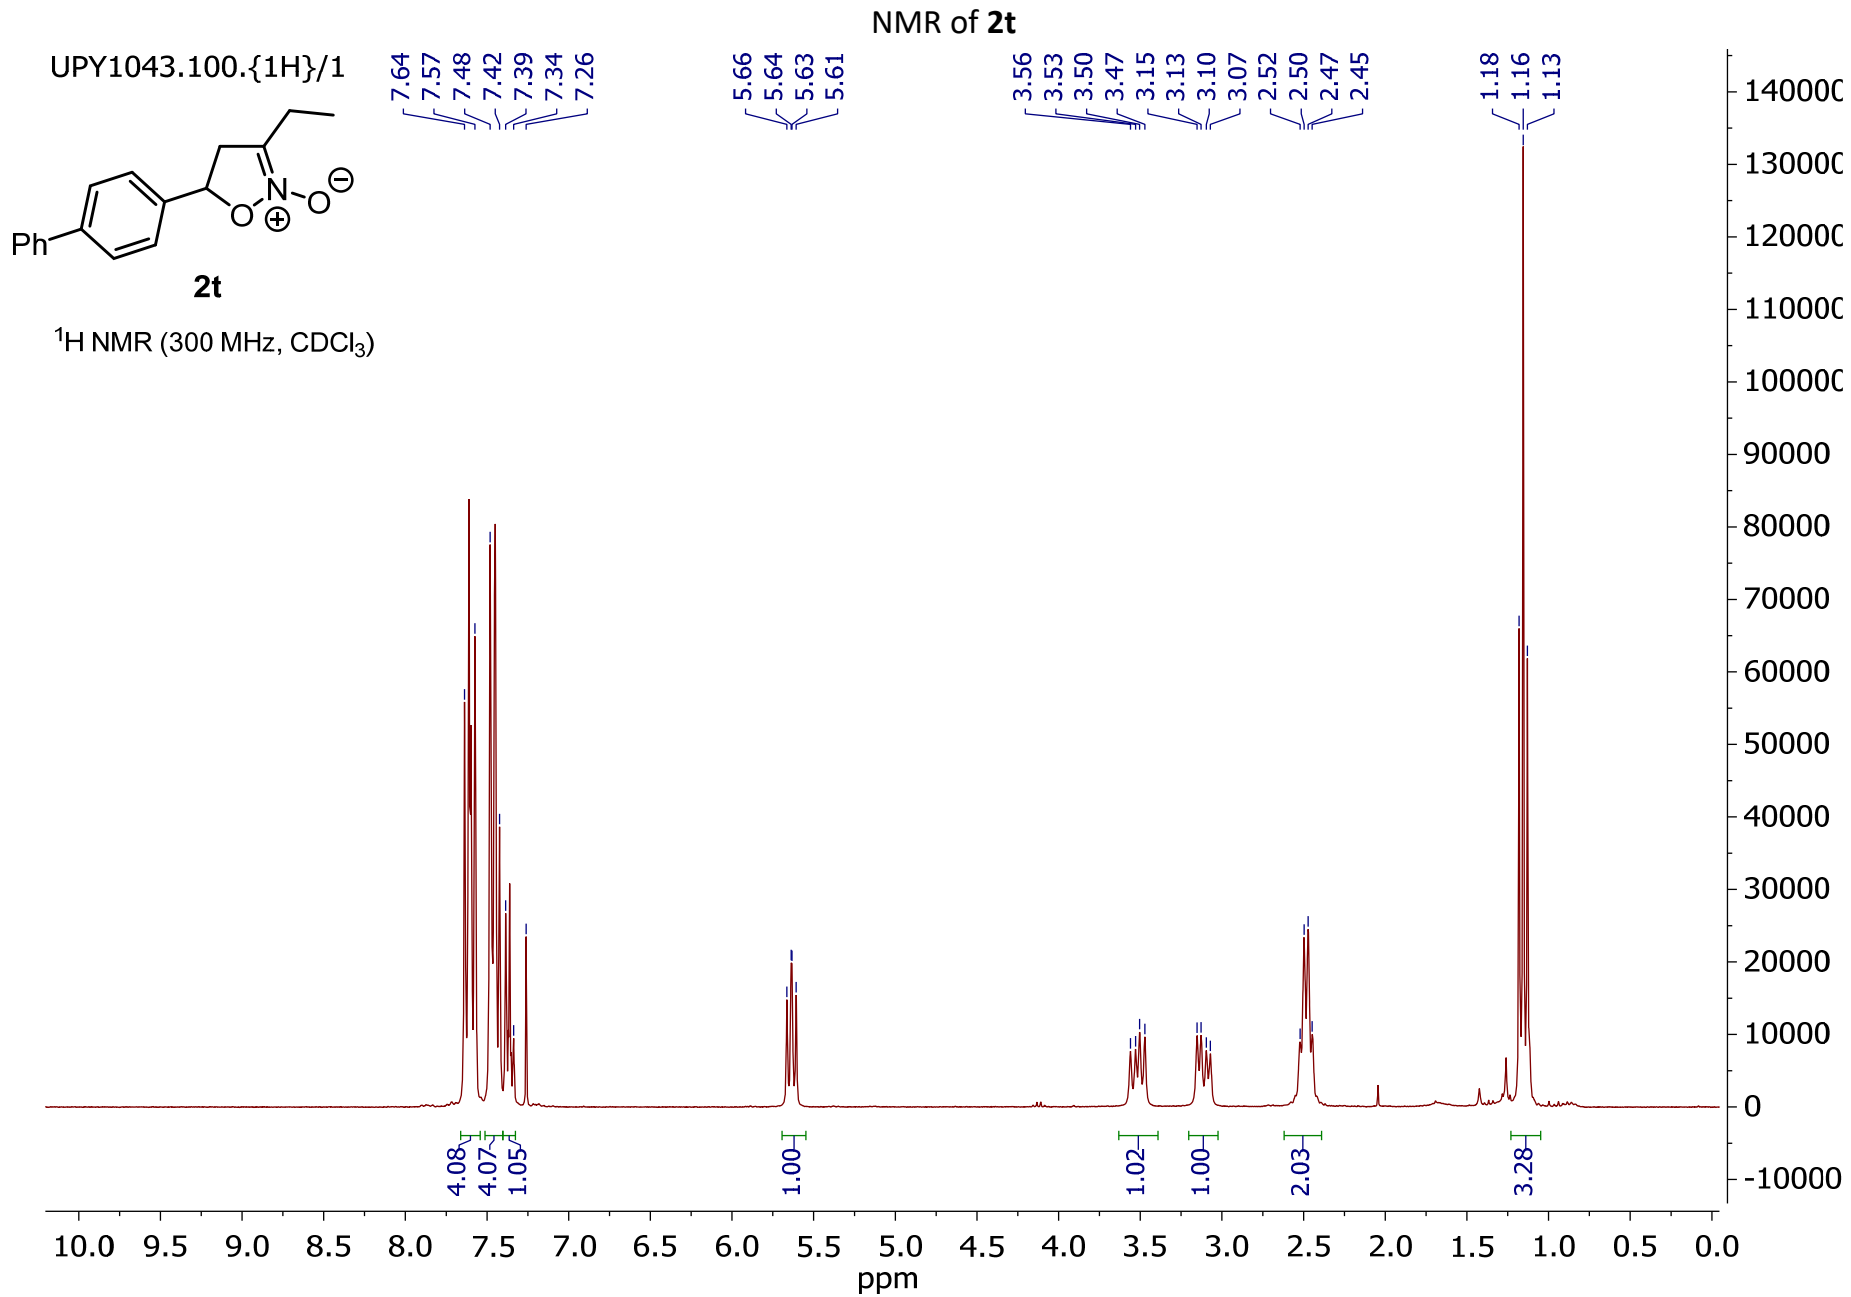

UPY1043.100.{13C}/2

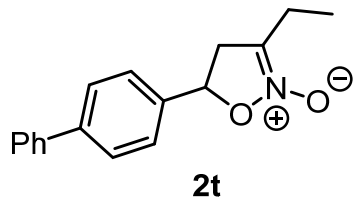

<sup>13</sup>C NMR (75 MHz, CDCl<sub>3</sub>)

NMR of 2t

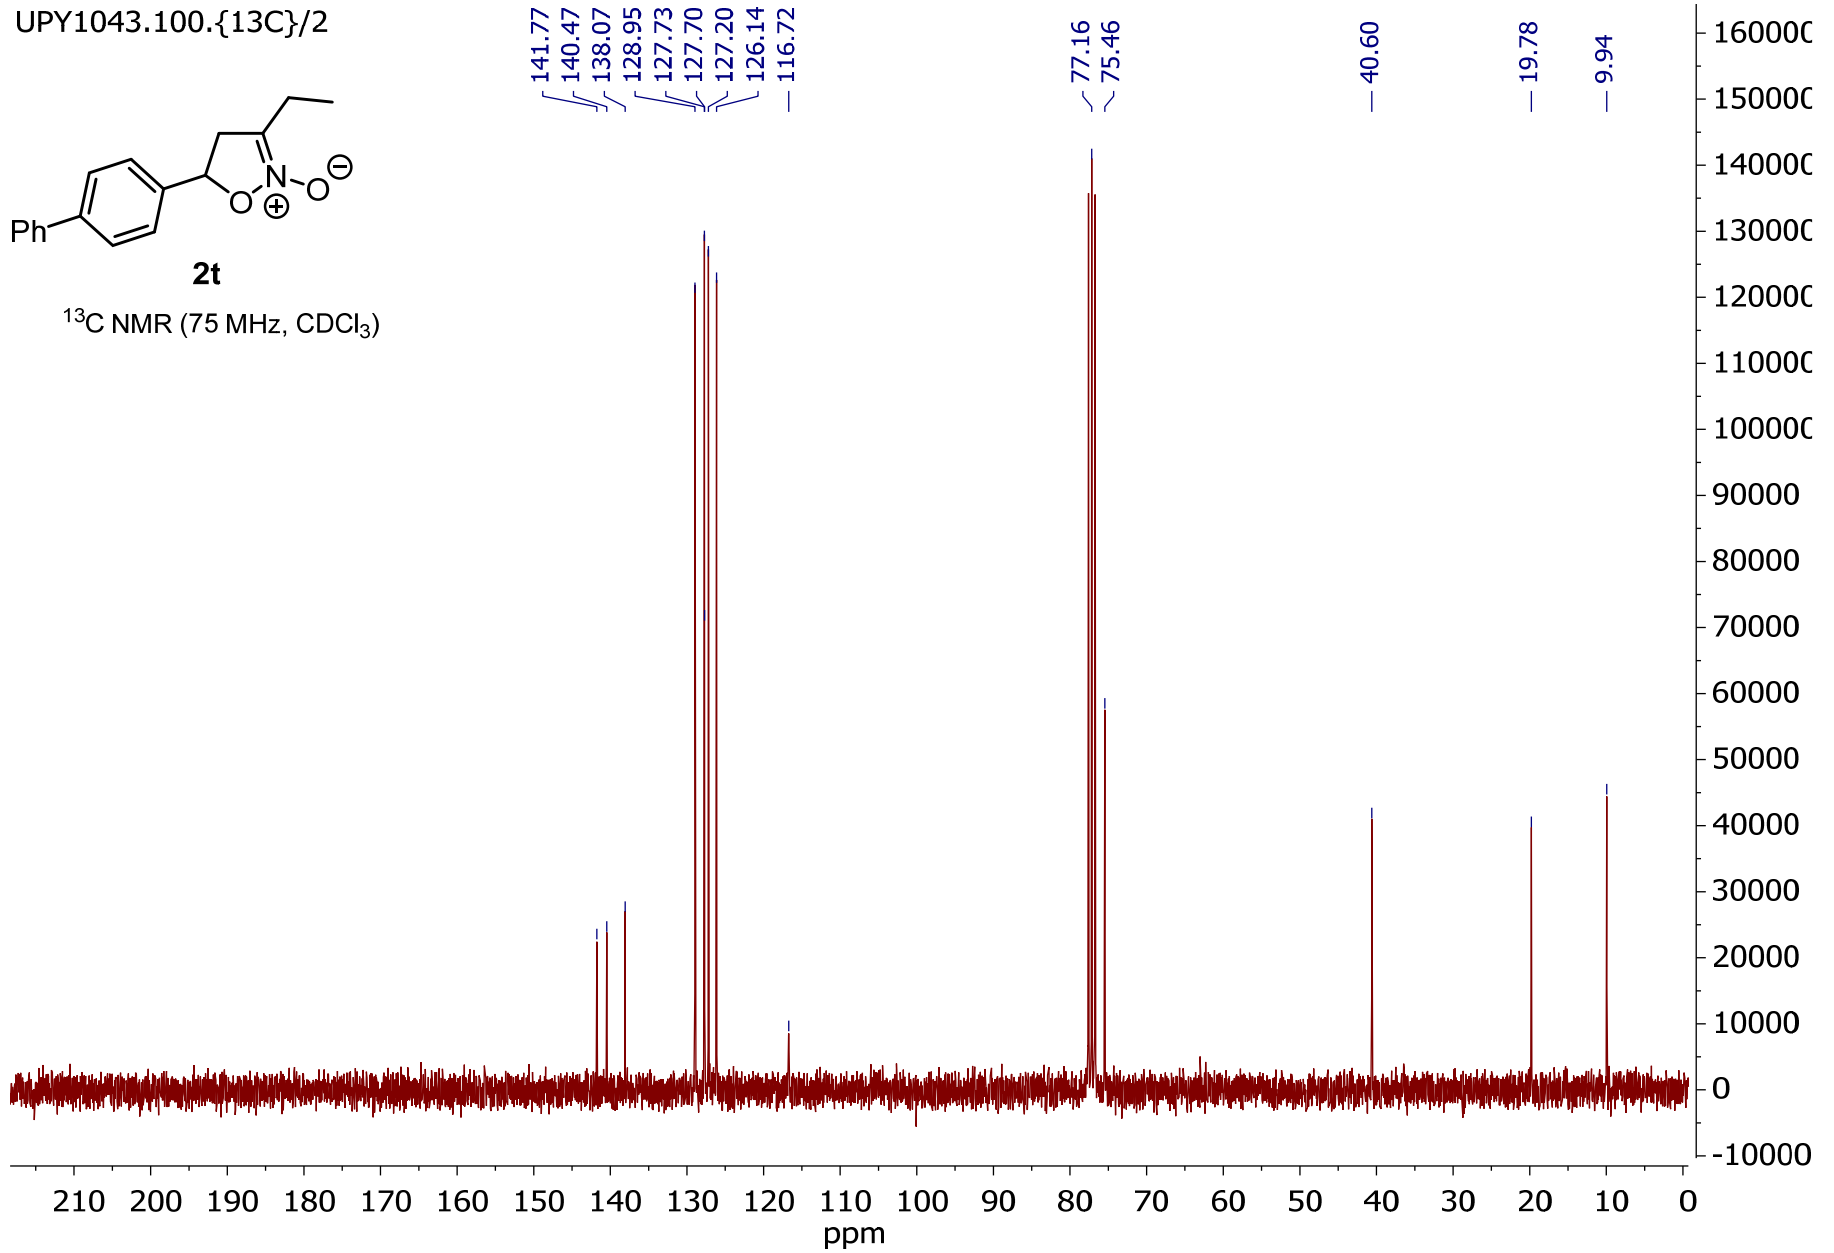

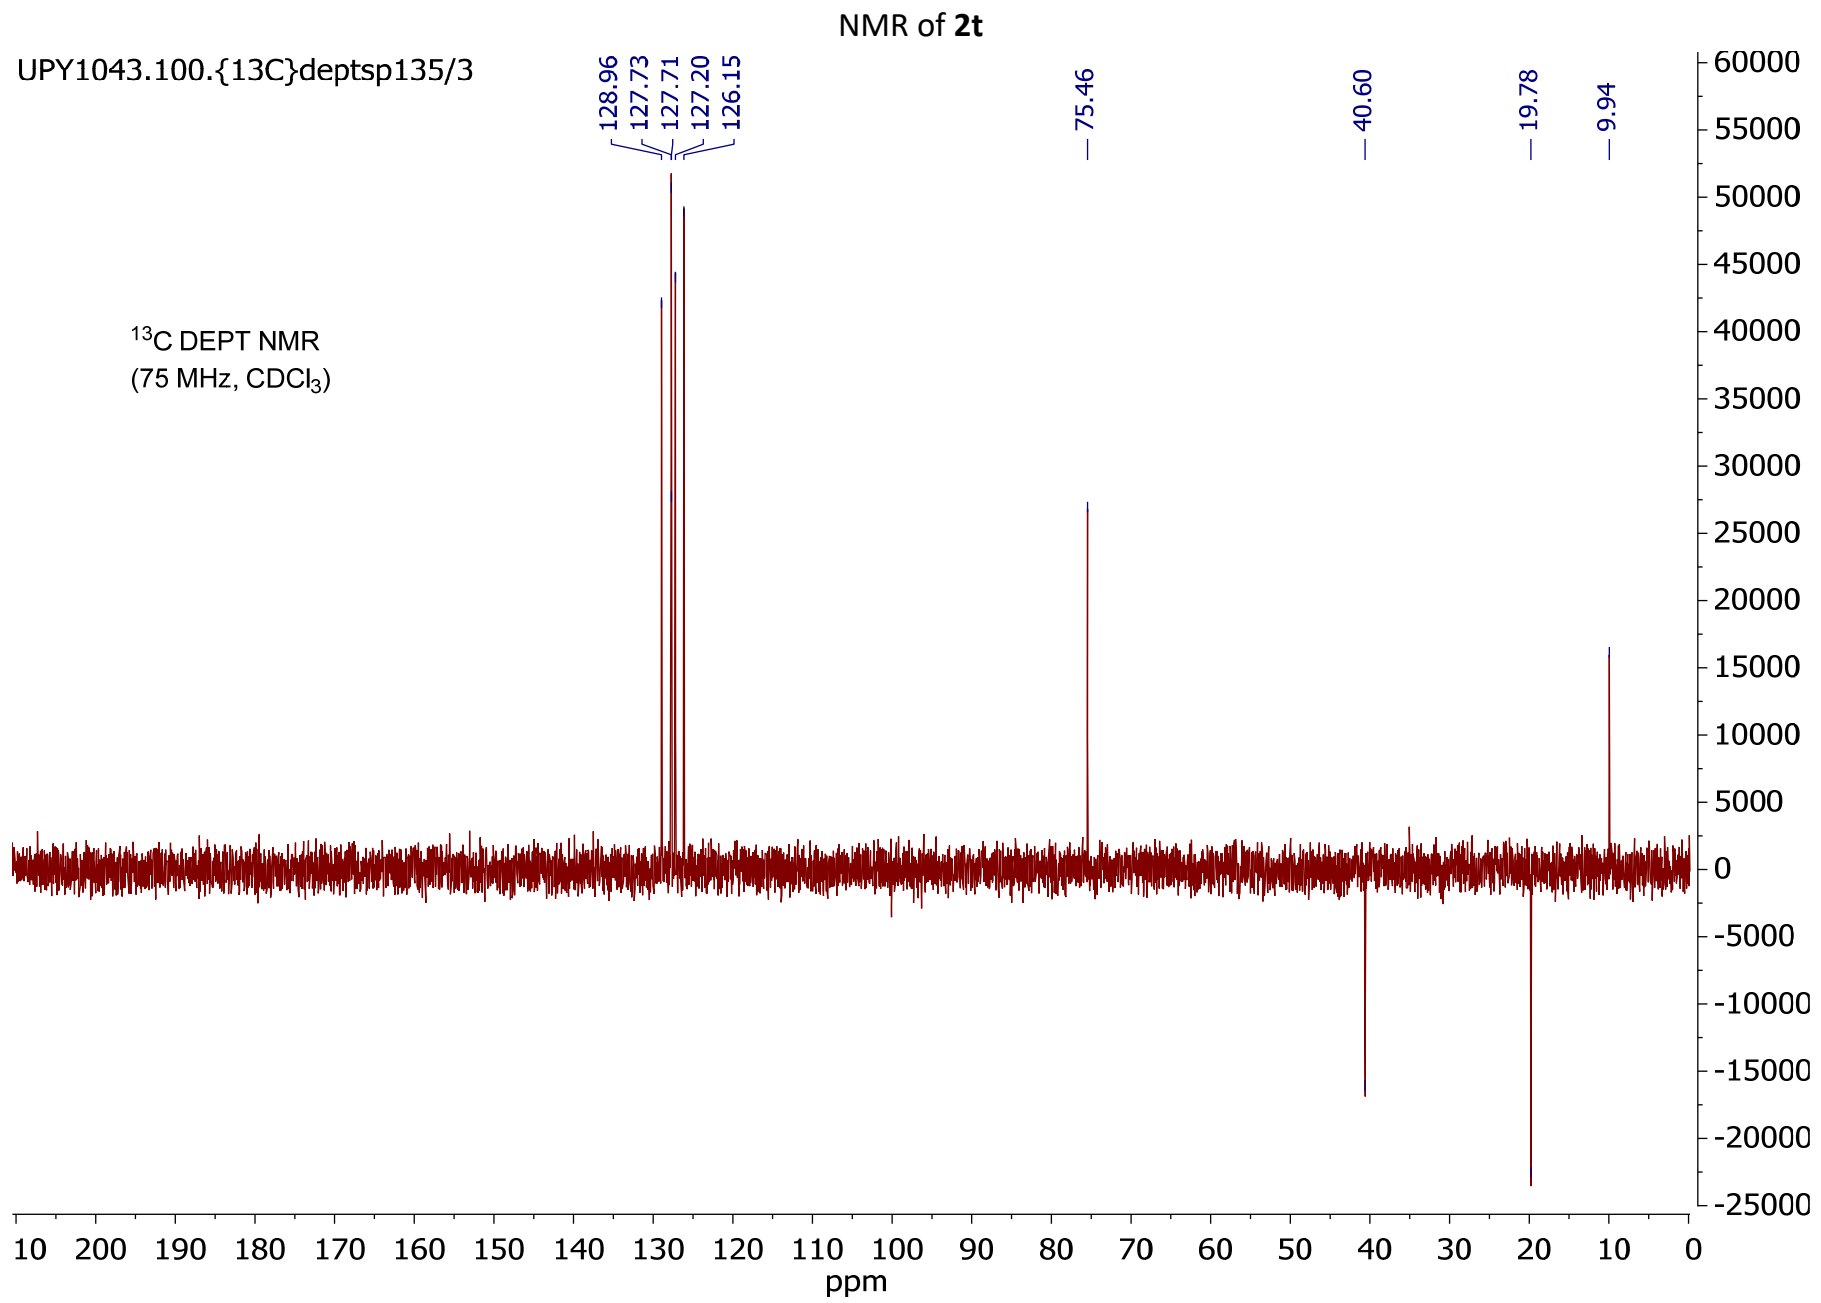

# FTIR (ATR) of 2t

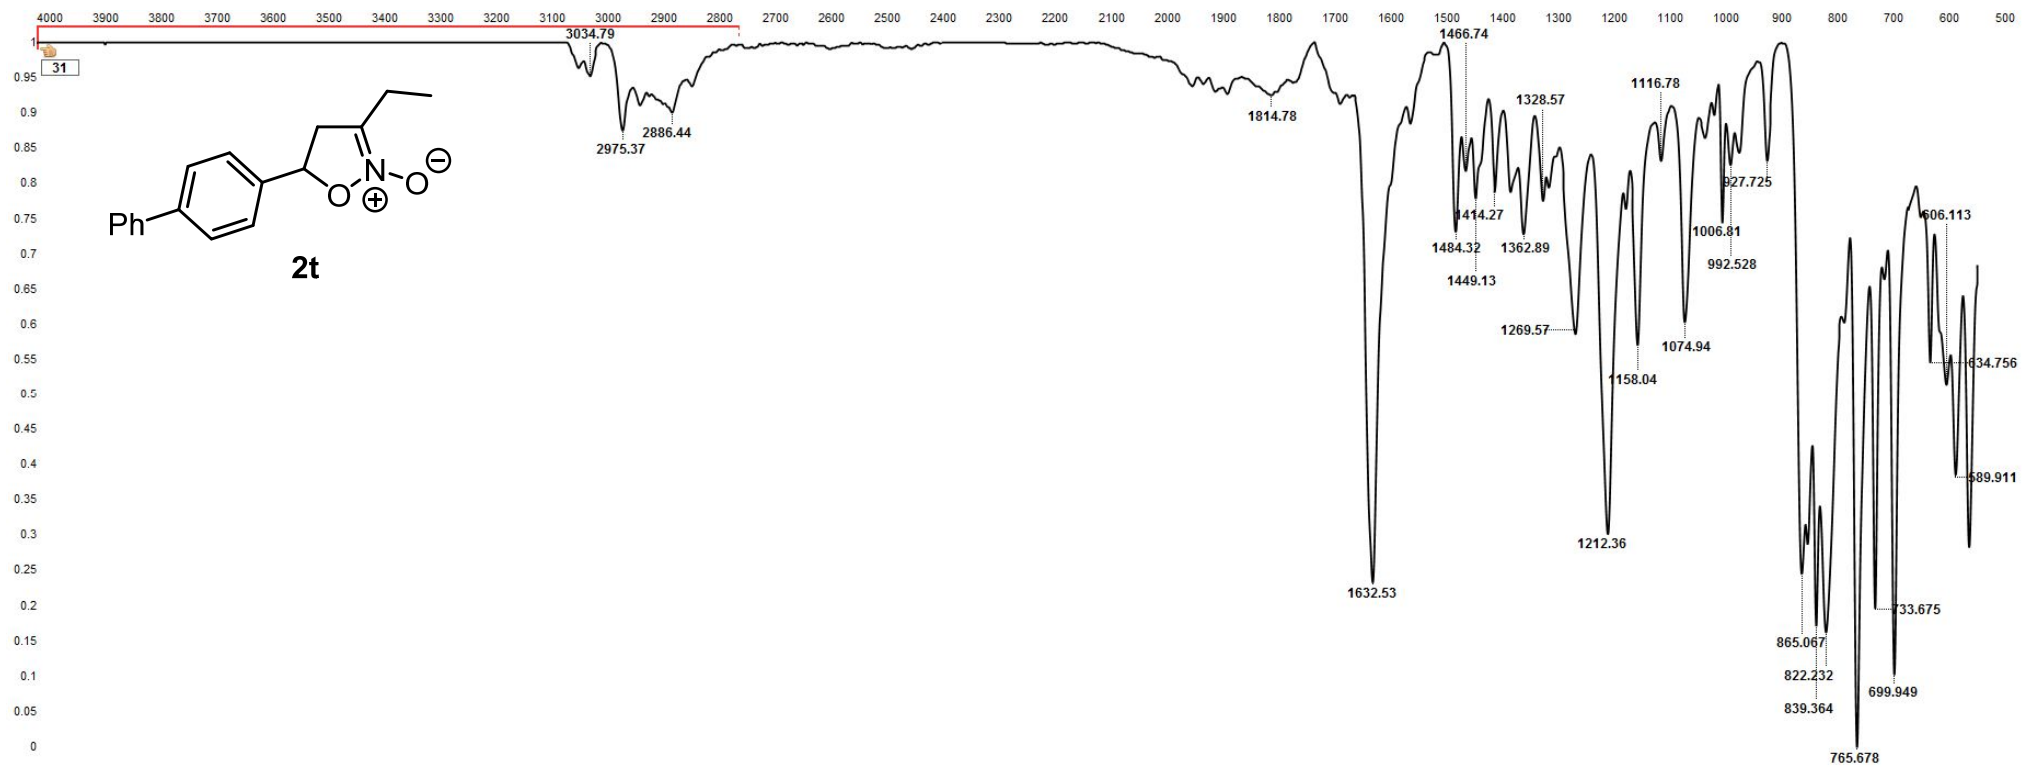

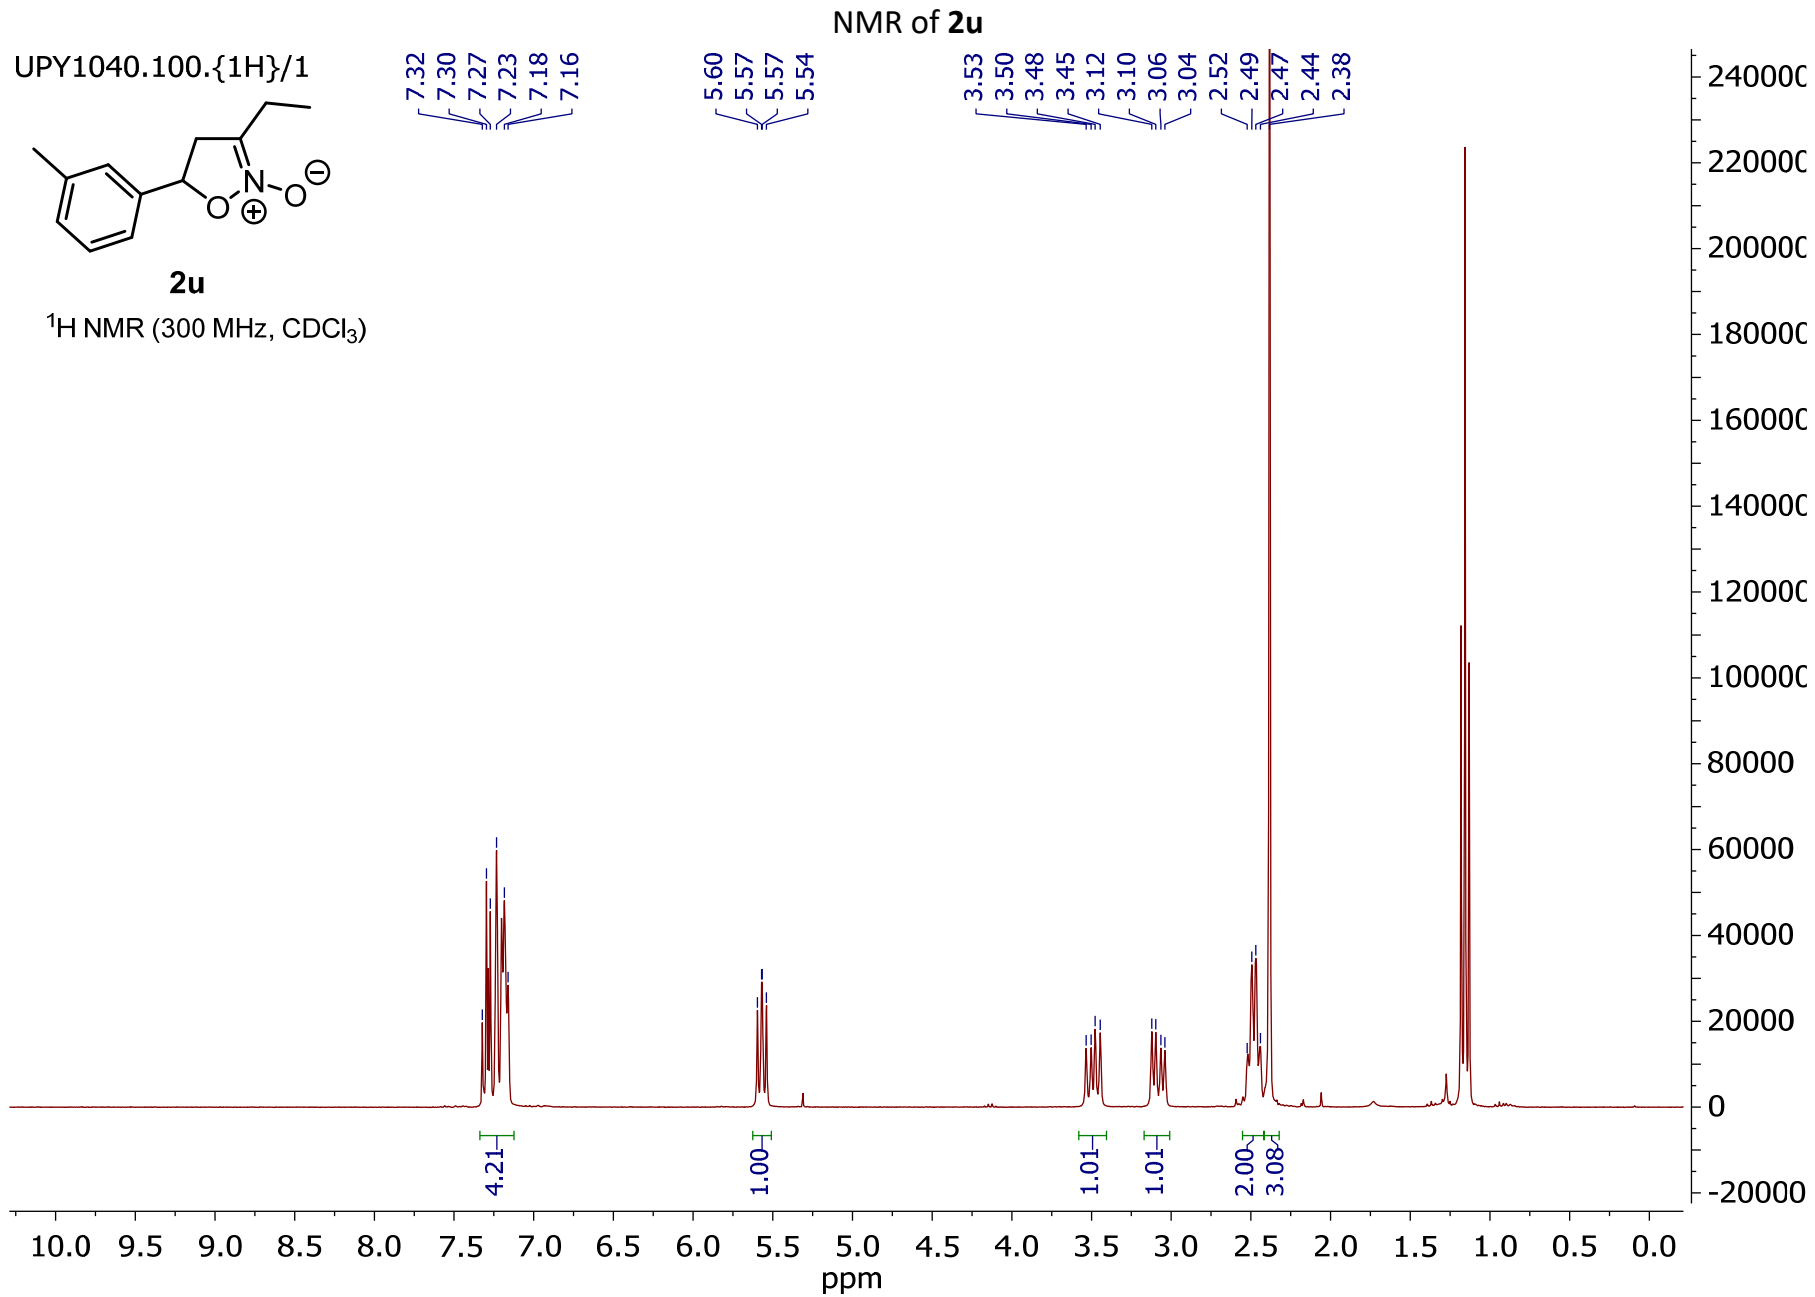



UPY1040.100.{13C}/2

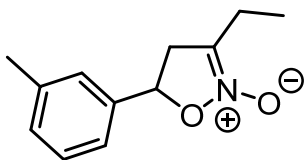

**2u**

<sup>13</sup>C NMR (75 MHz, CDCl<sub>3</sub>)

NMR of **2u**

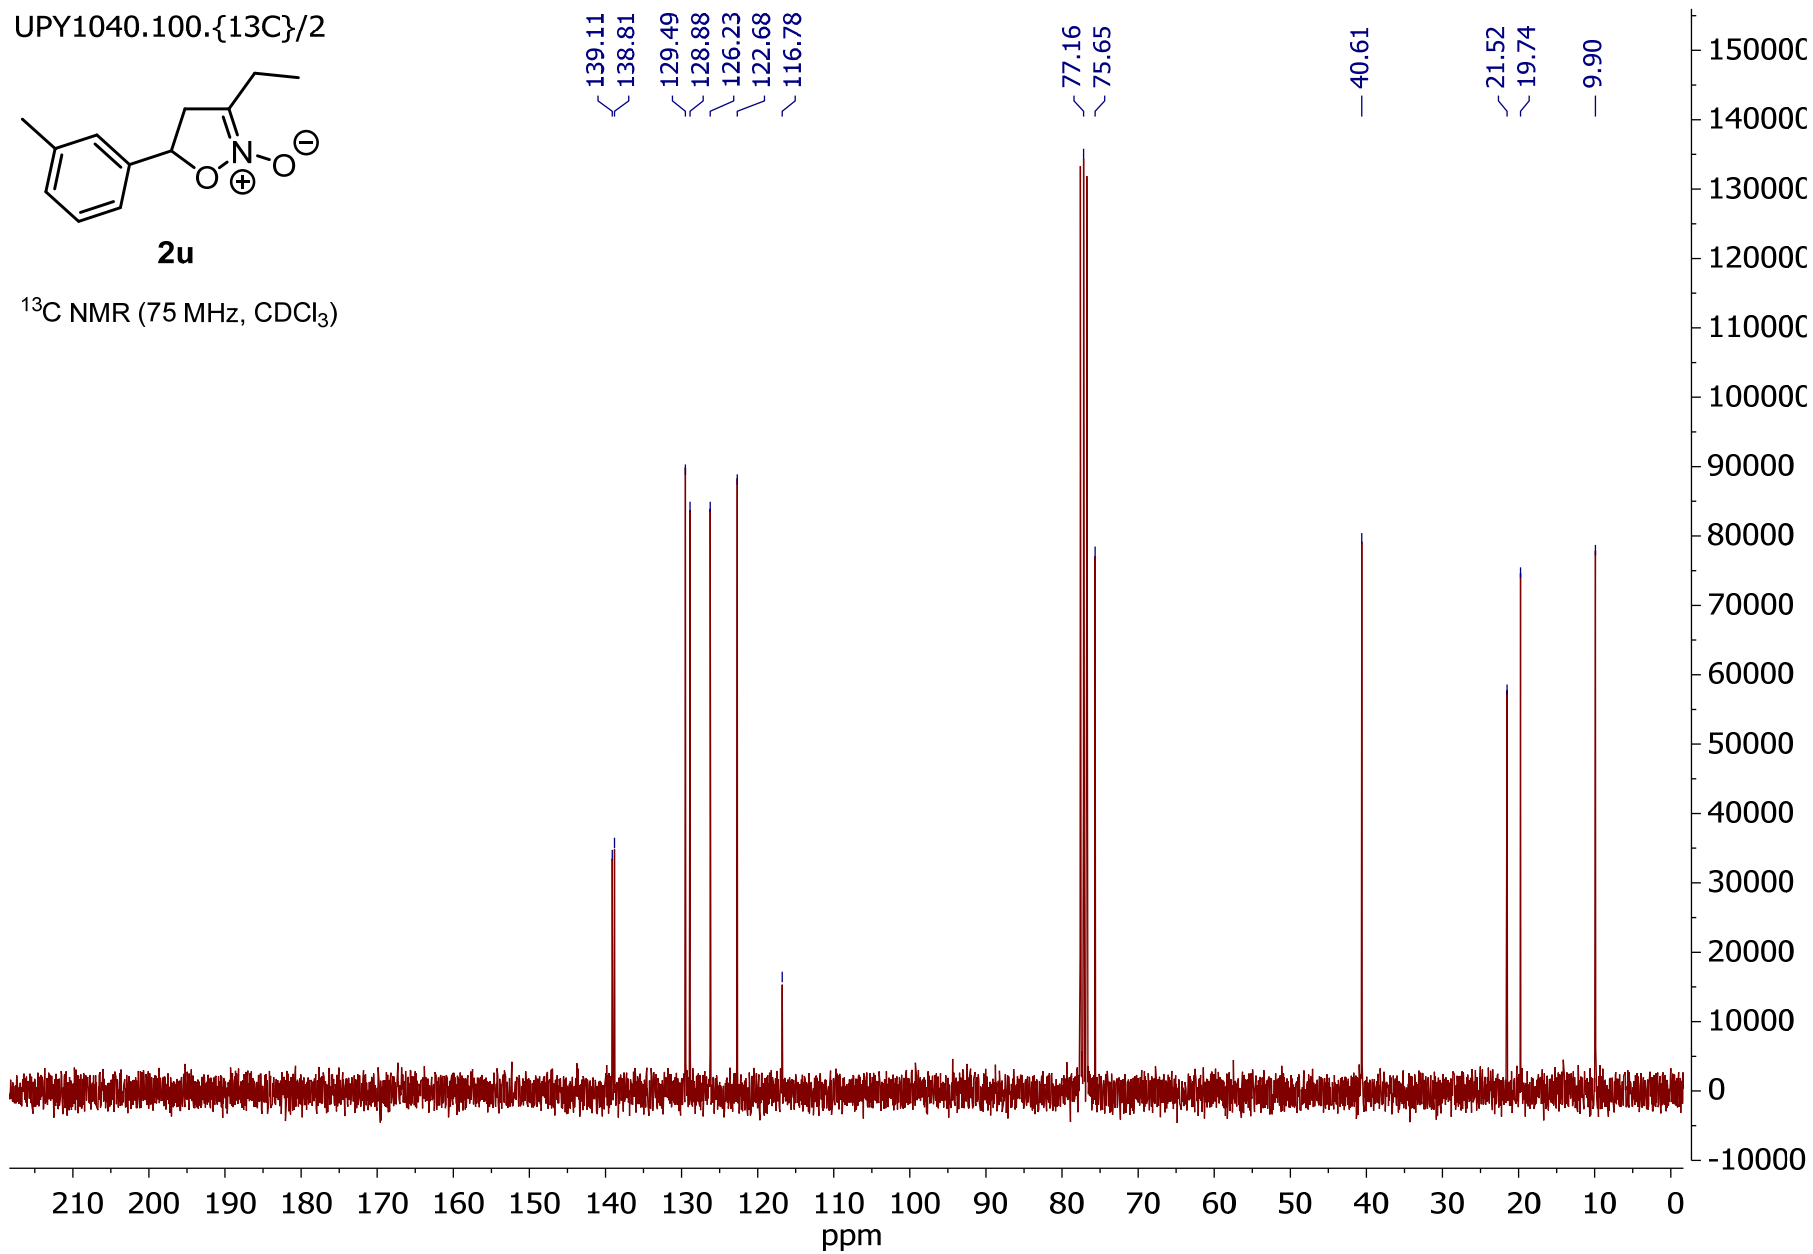

UPY1040.100.{13C}depts135/3

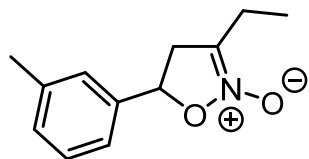

**2u**

<sup>13</sup>C DEPT NMR  
(75 MHz, CDCl<sub>3</sub>)

NMR of **2u**

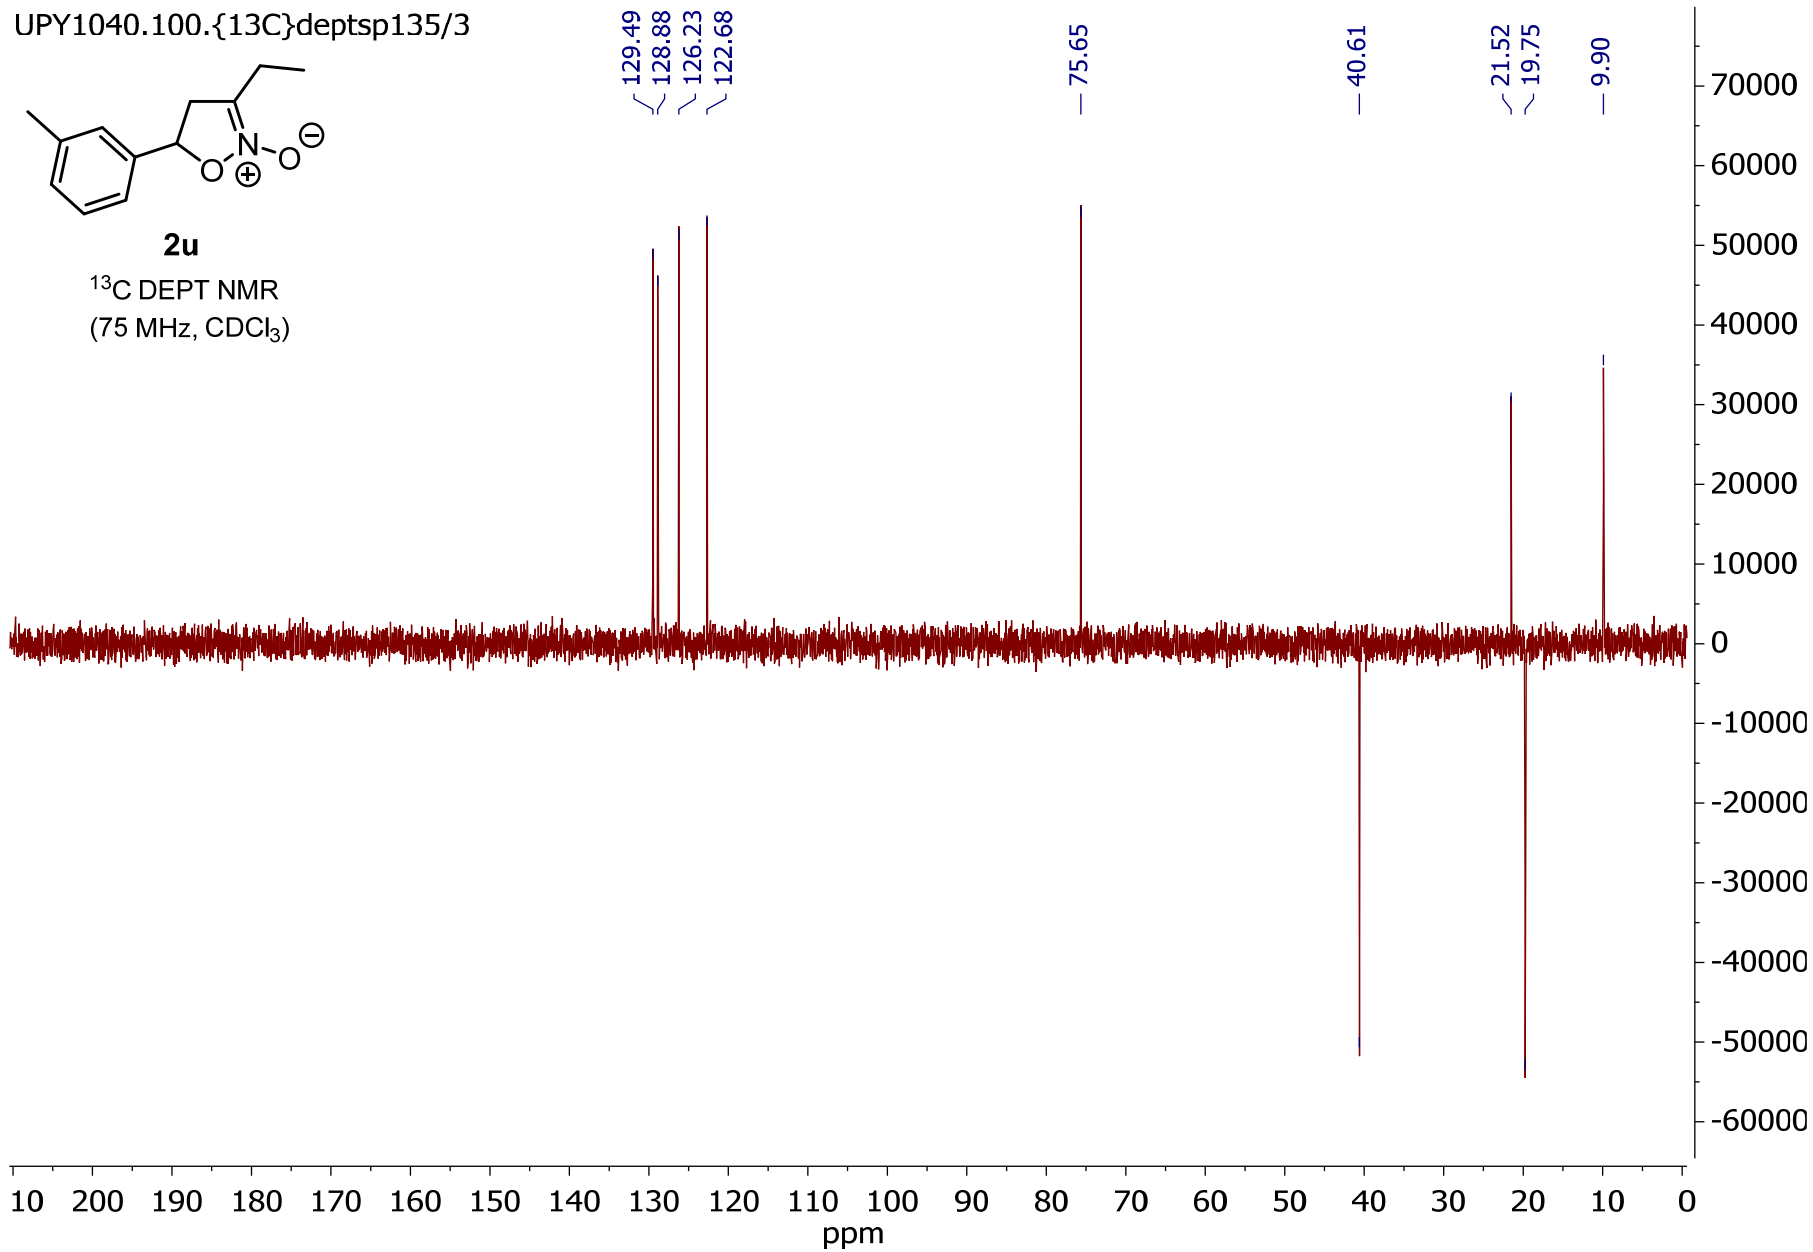

# NMR of 6

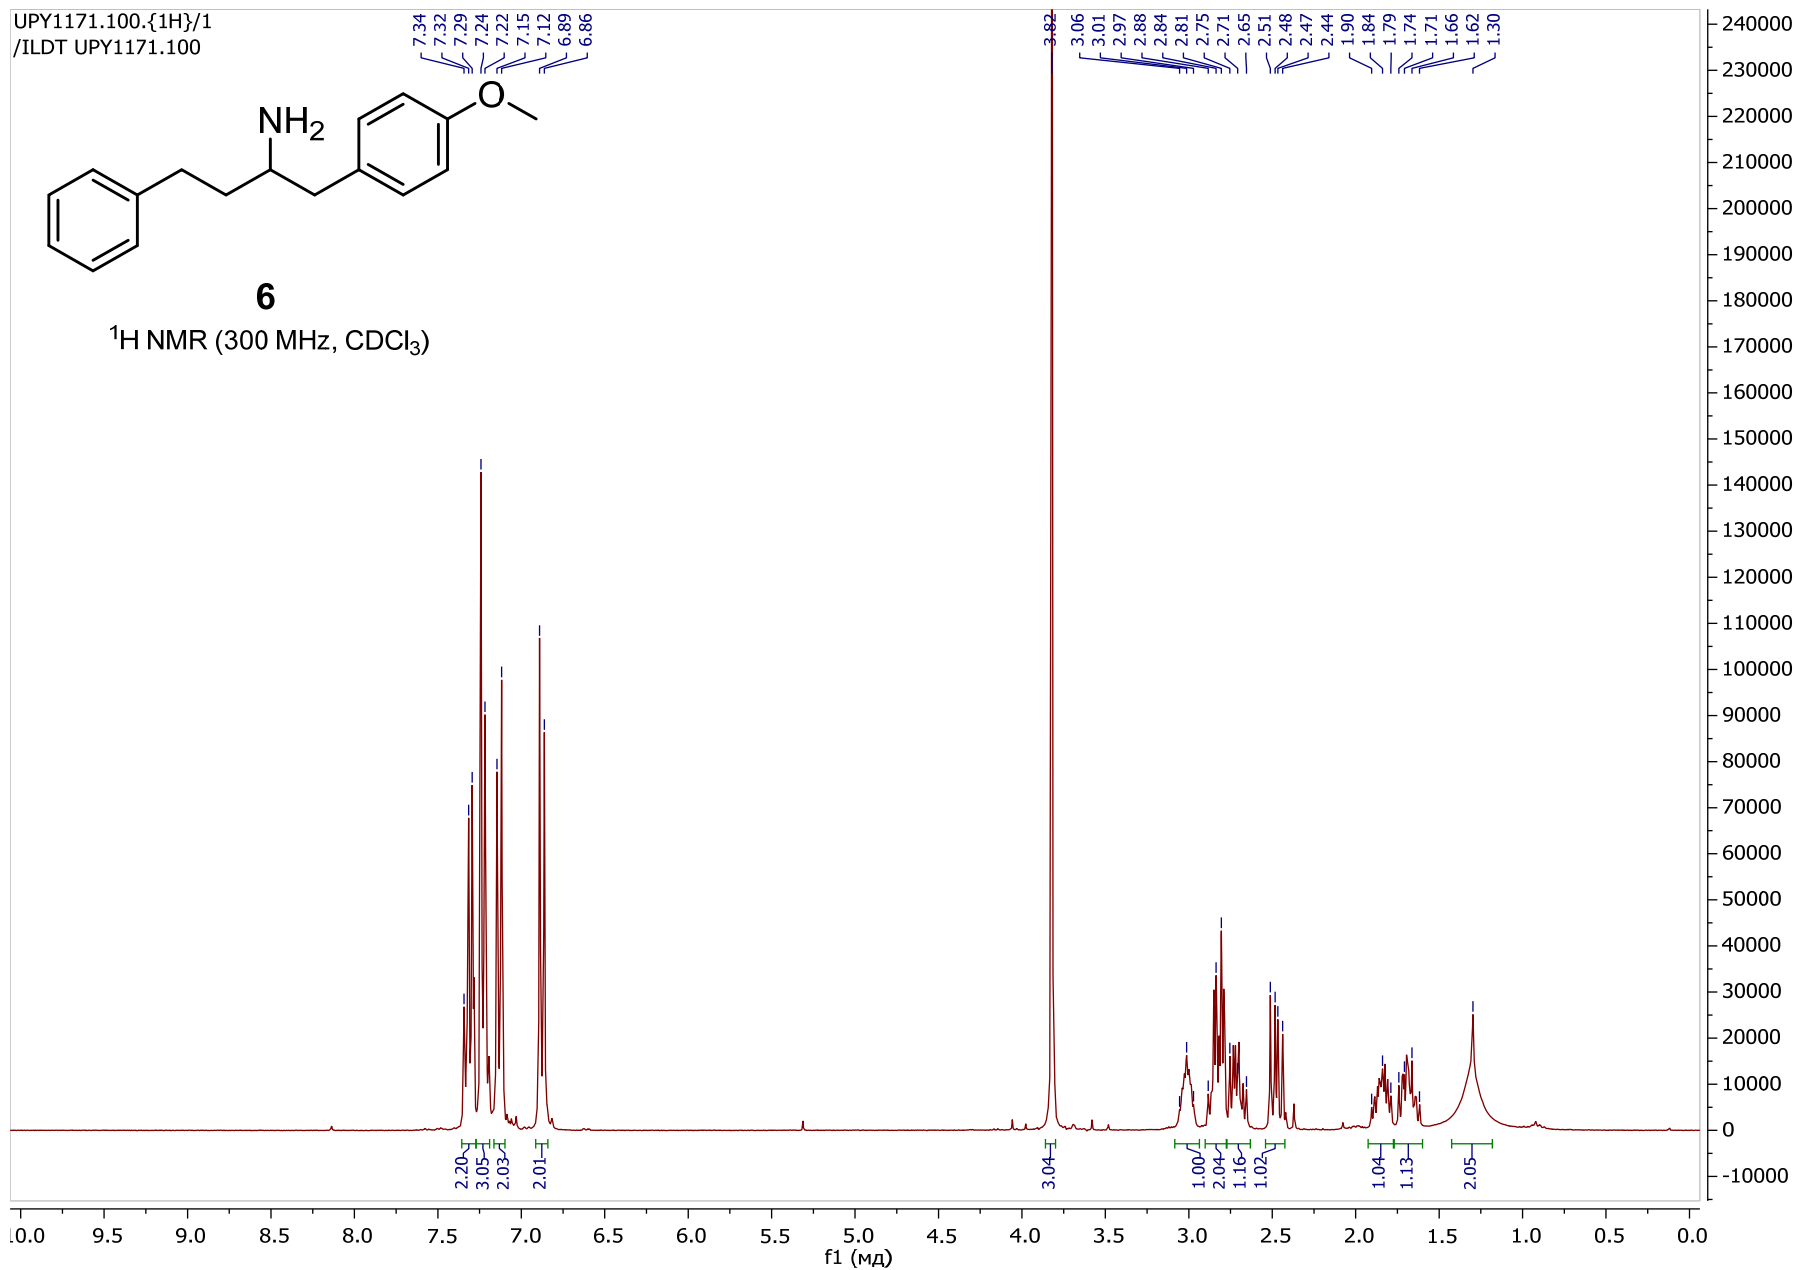

# NMR of 6

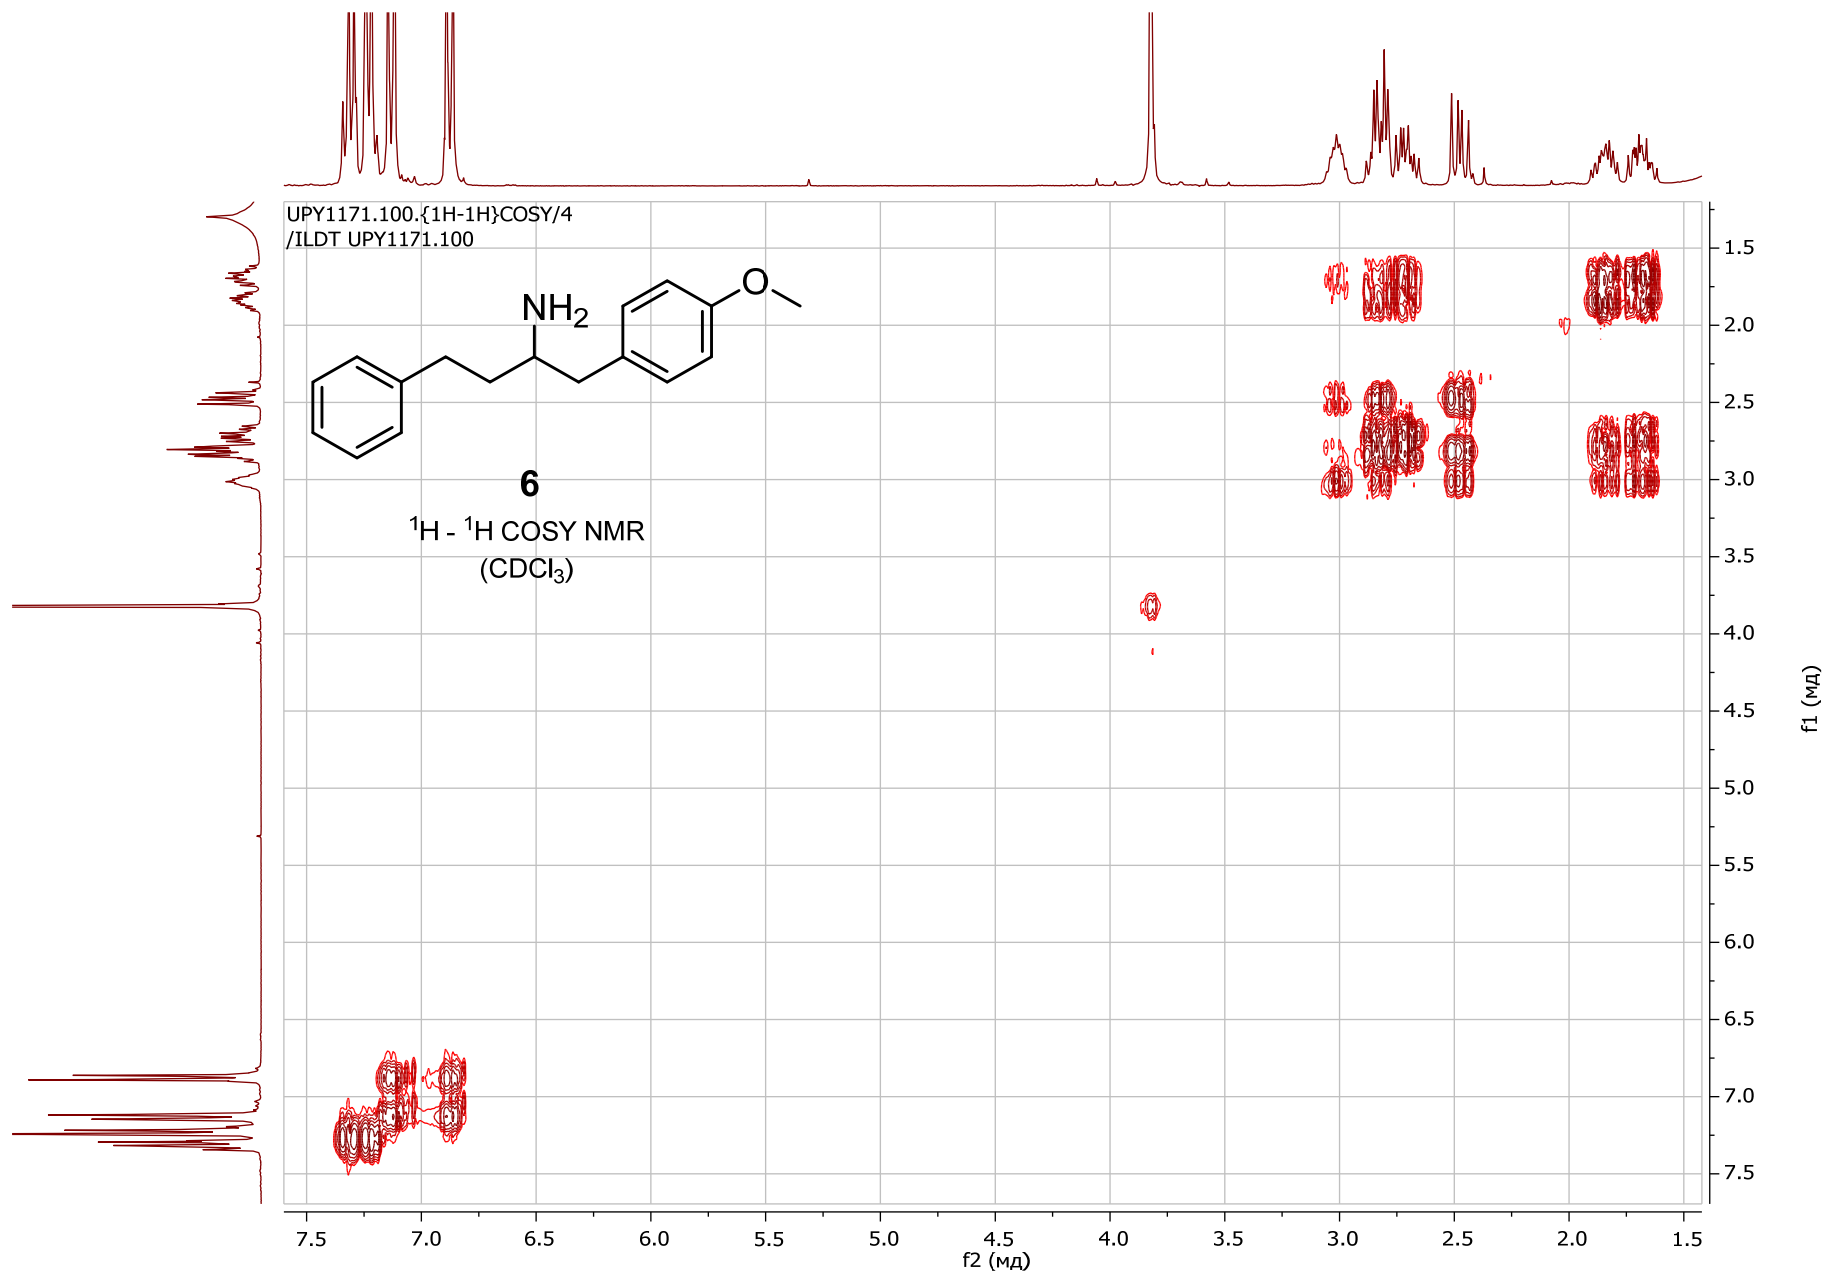

# NMR of 6

UPY1171.100.{13C}/2  
/ILD T UPY1171.100

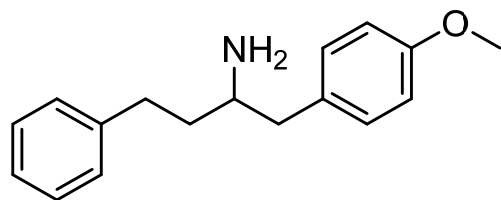

**6**

<sup>13</sup>C NMR (75 MHz, CDCl<sub>3</sub>)

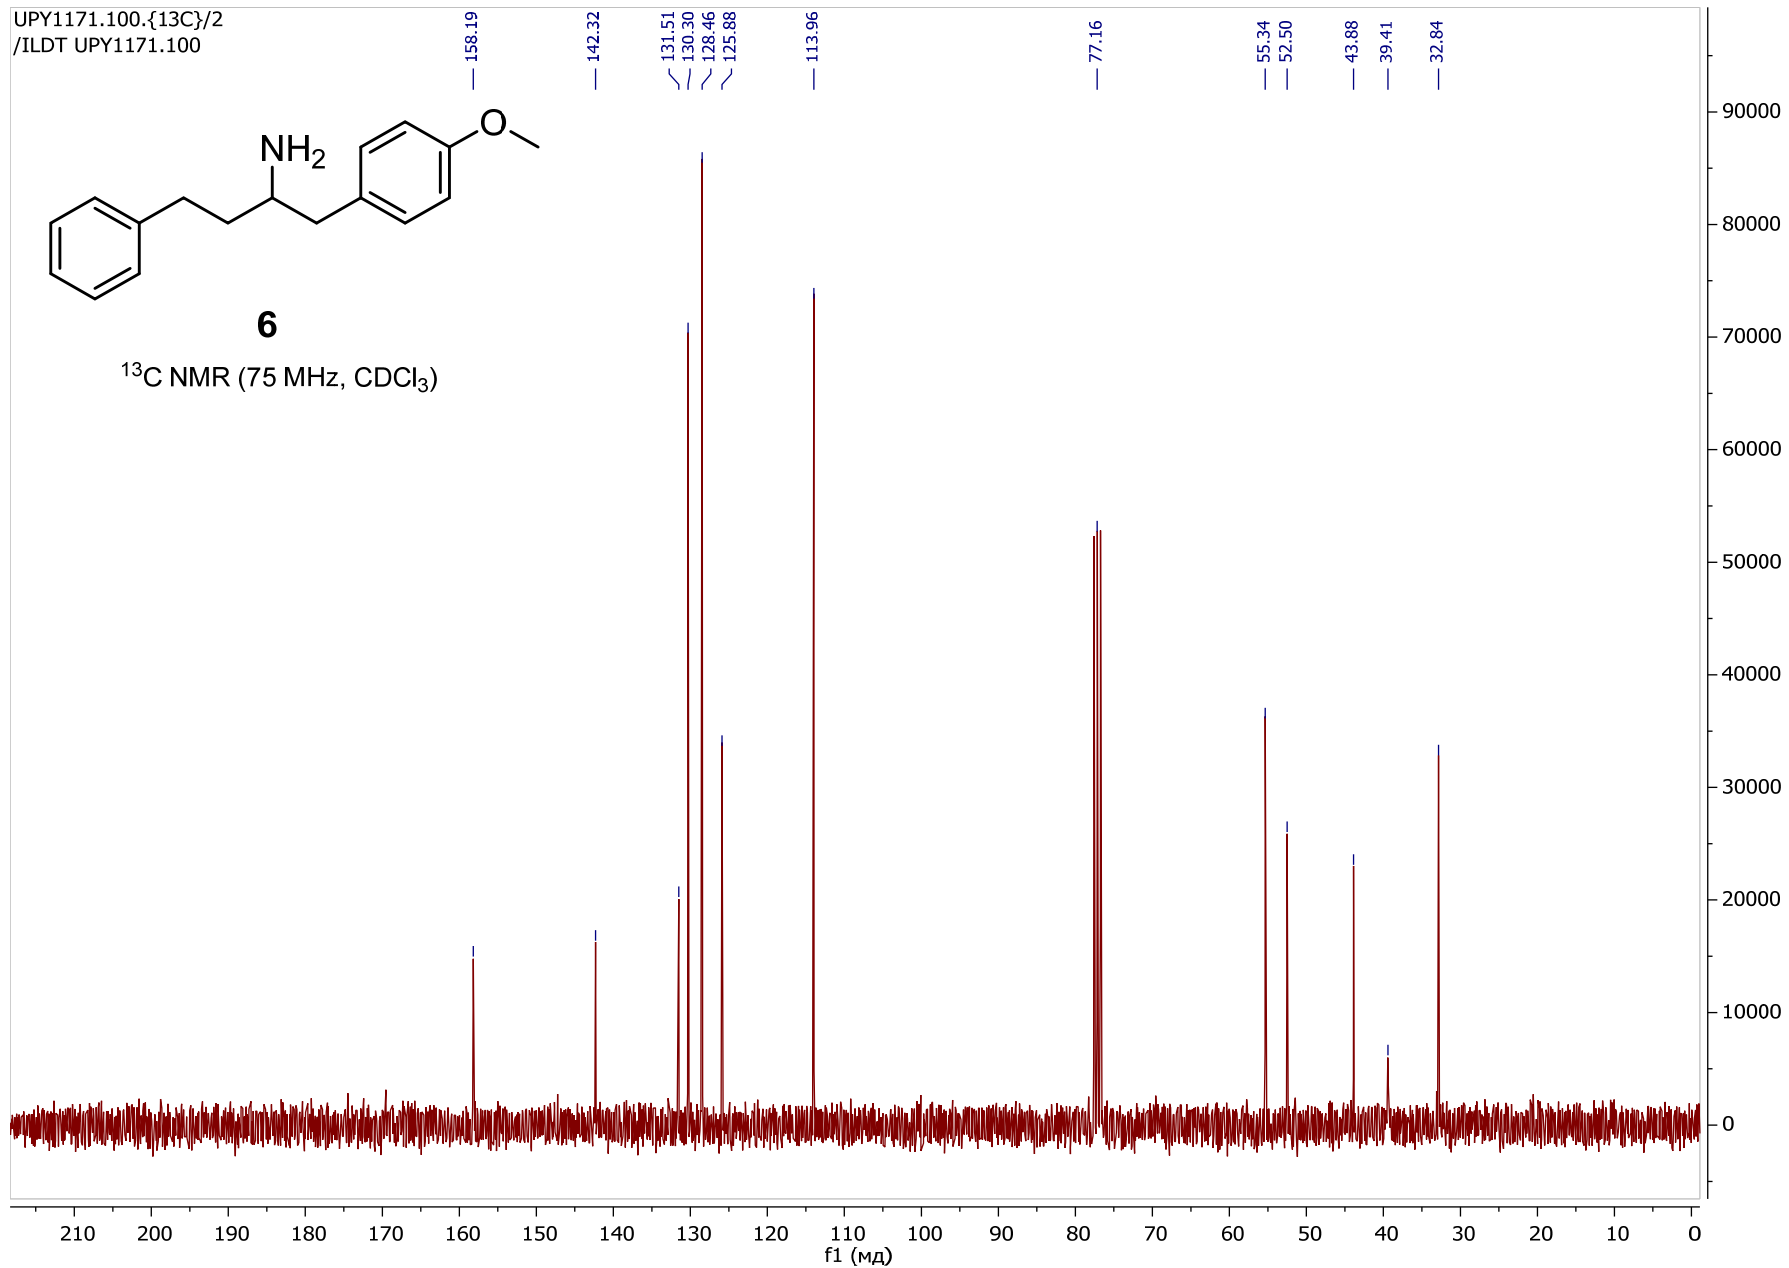

# NMR of 6

UPY1171.100.{13C}deptsp135/3  
/ILDY UPY1171.100

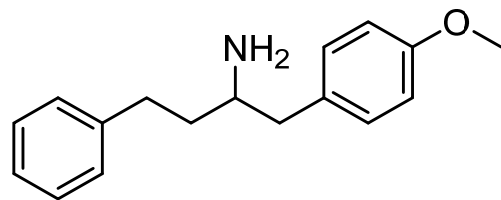

**6**

$^{13}\text{C}$  DEPT NMR  
(75 MHz,  $\text{CDCl}_3$ )

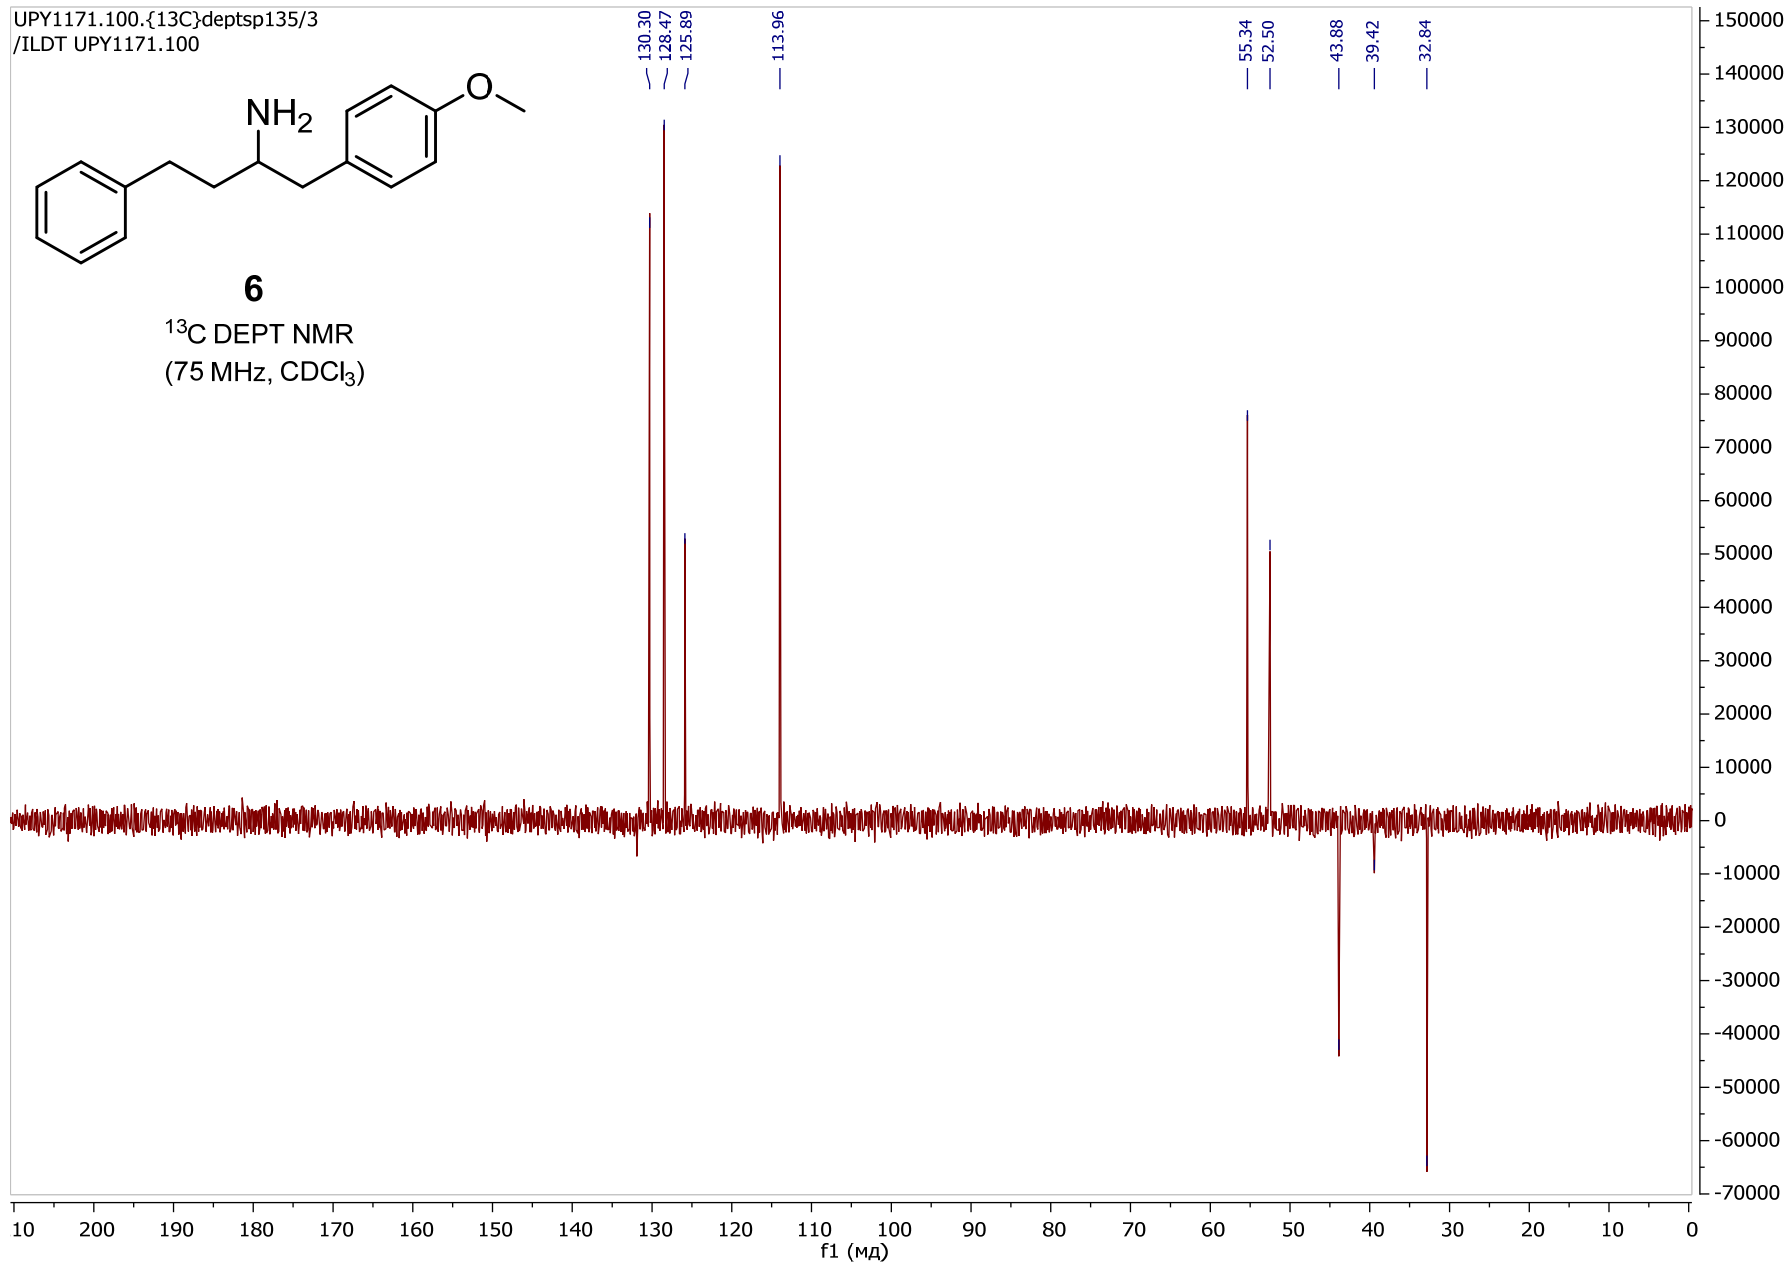

# NMR of 6

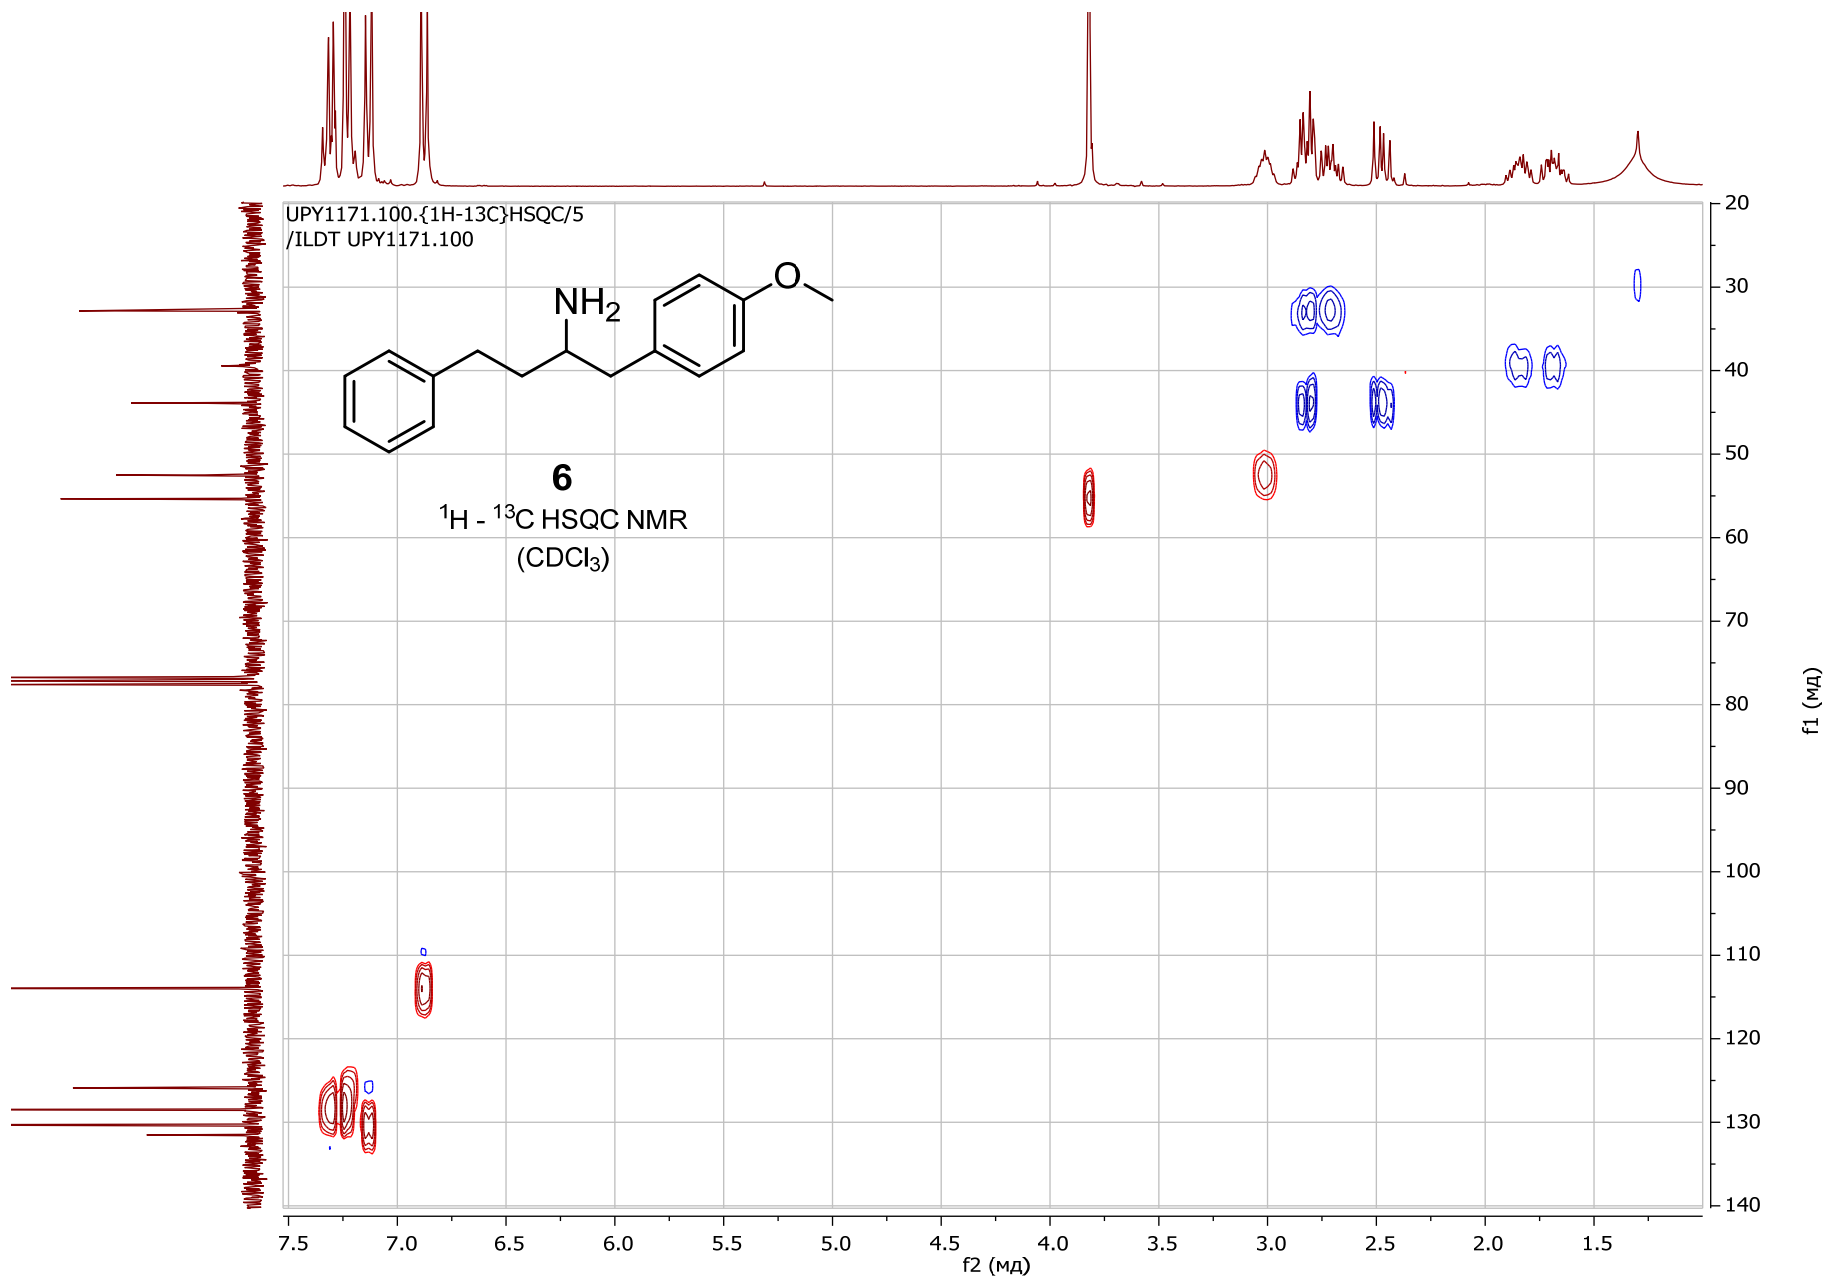

# FTIR (ATR) of 6

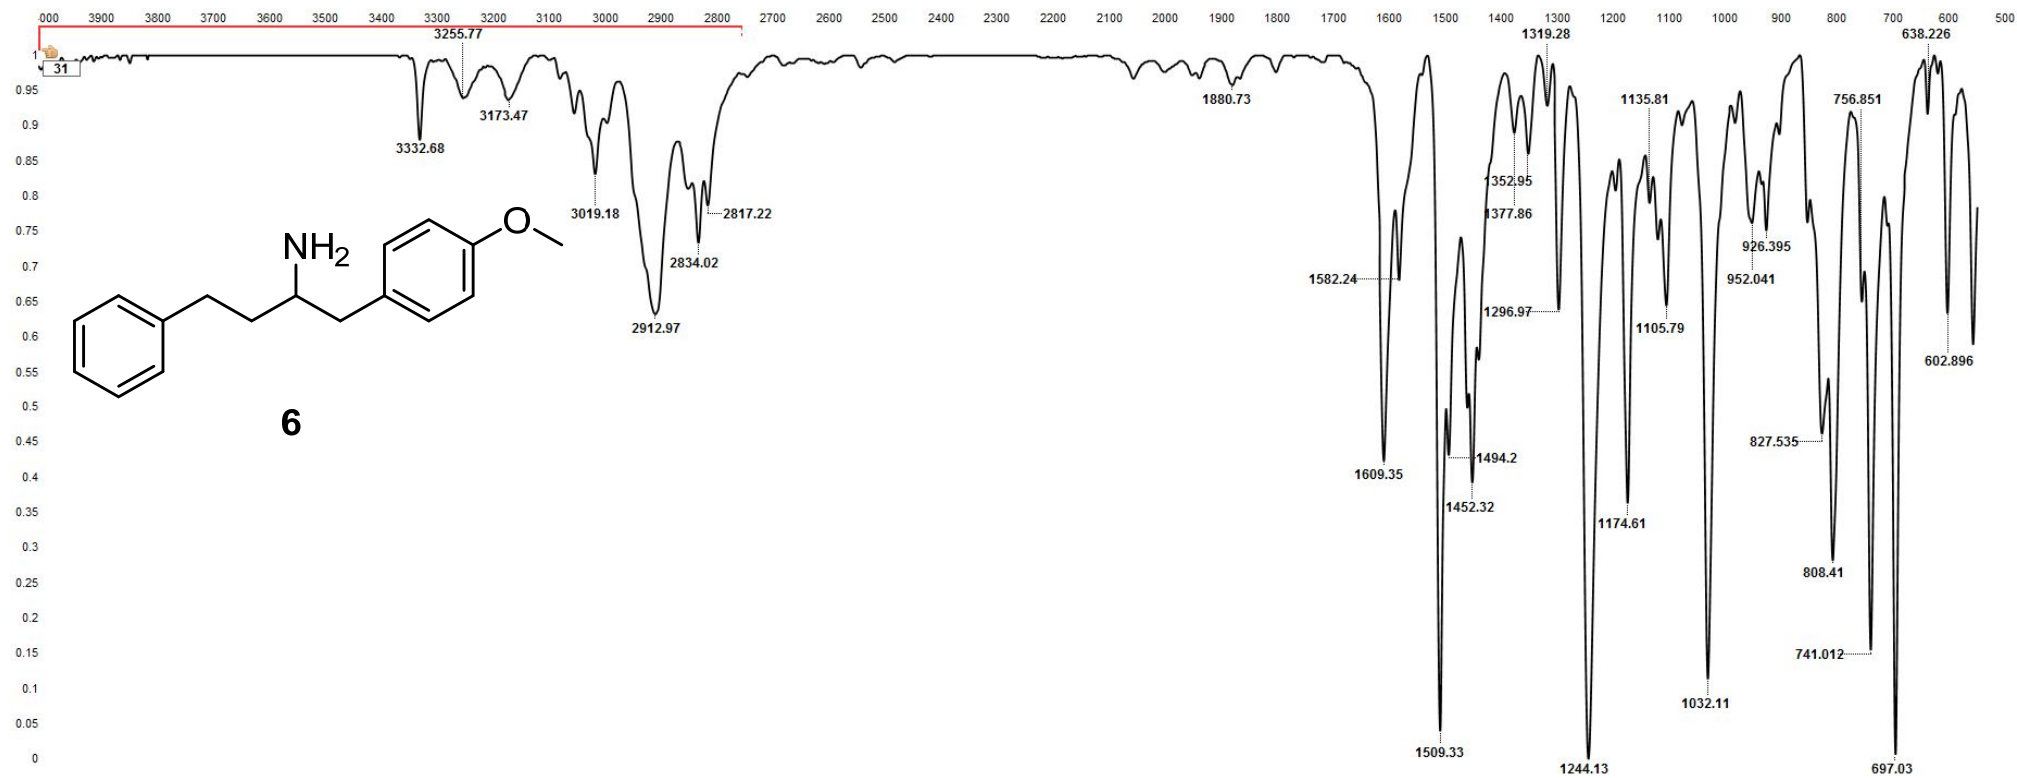



# NMR of 7

UPY1161.100.{1H}/1  
/ILDY1161.100

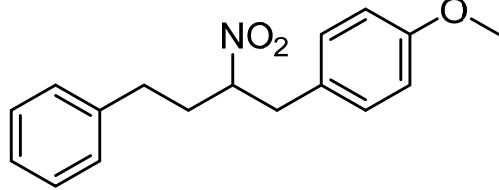

**7**

<sup>1</sup>H NMR (300 MHz, CDCl<sub>3</sub>)

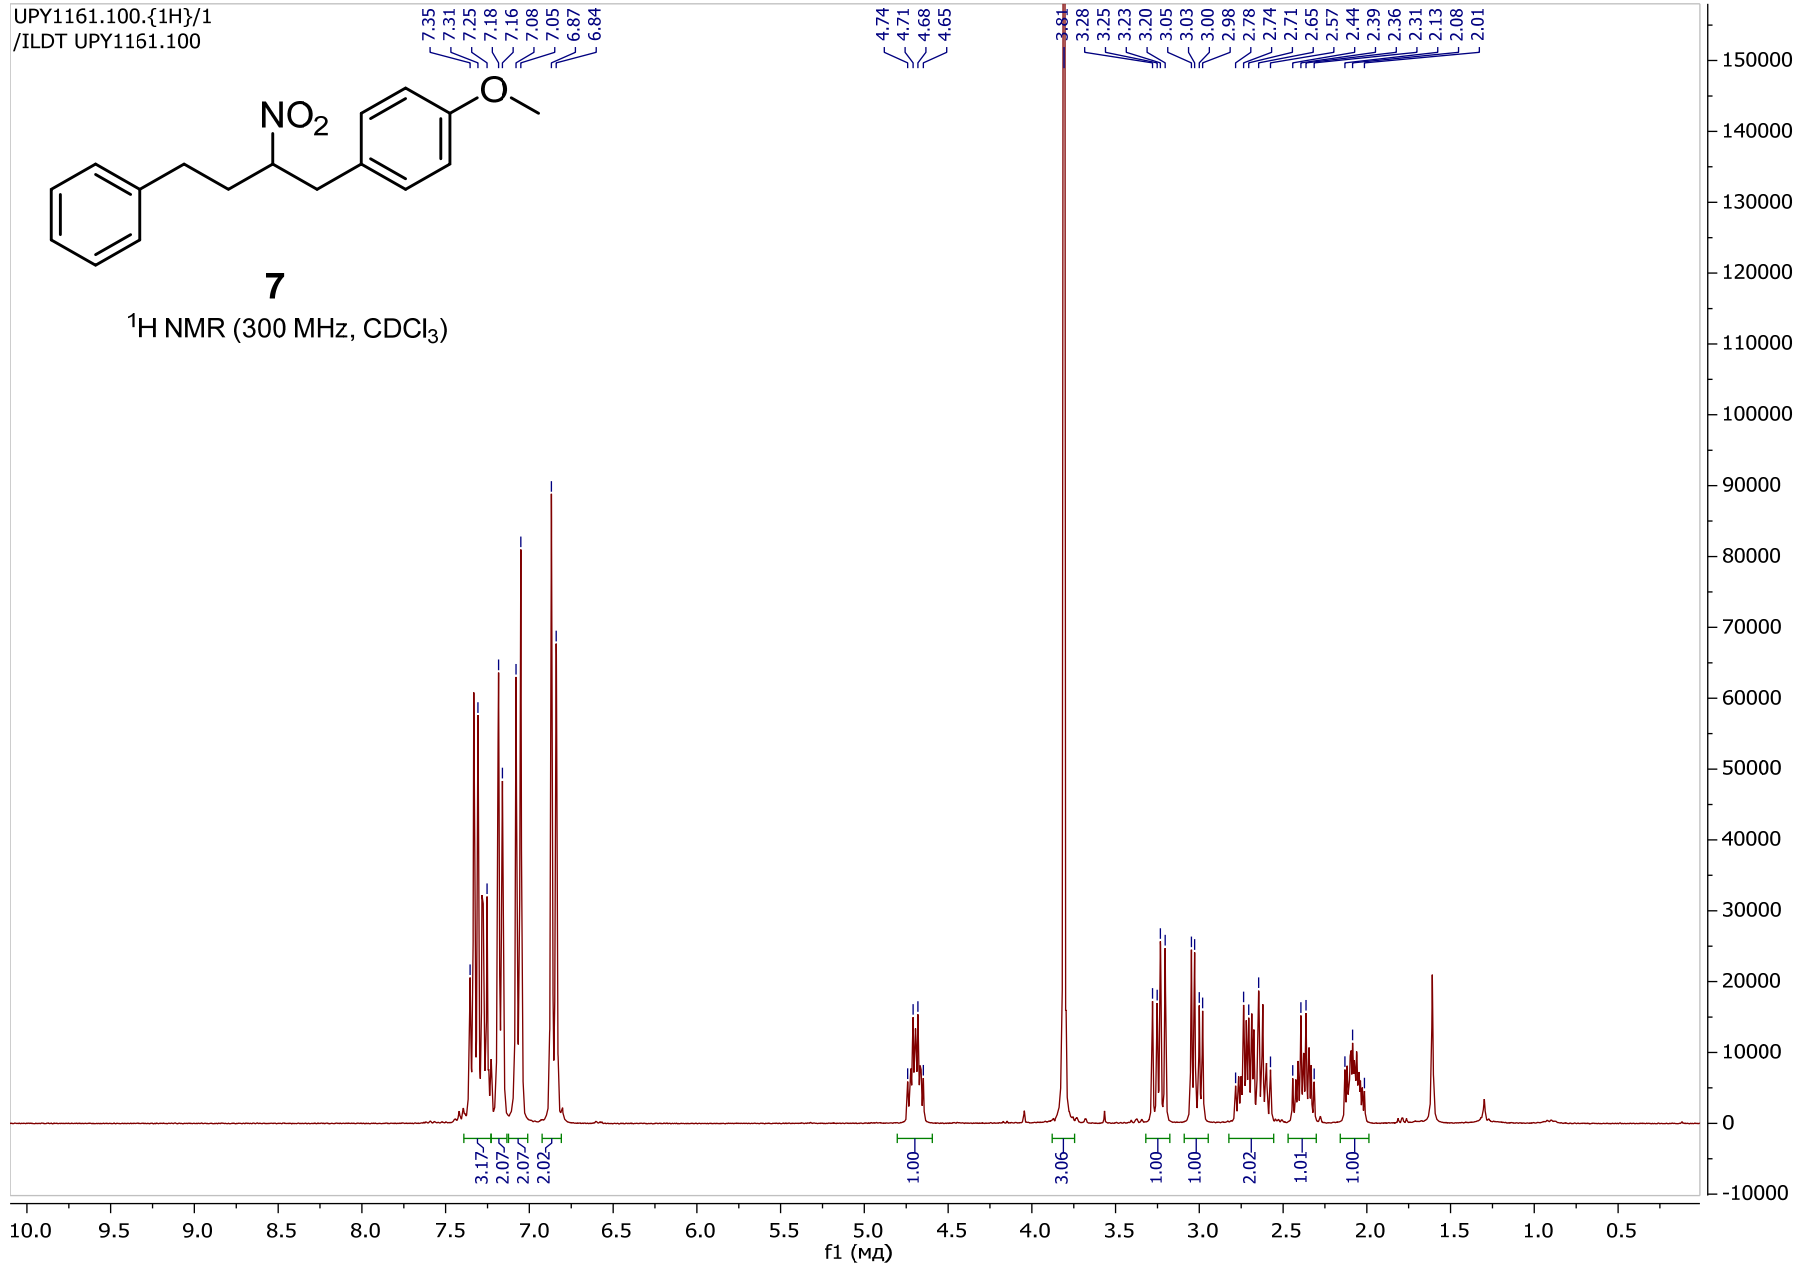

NMR of 7

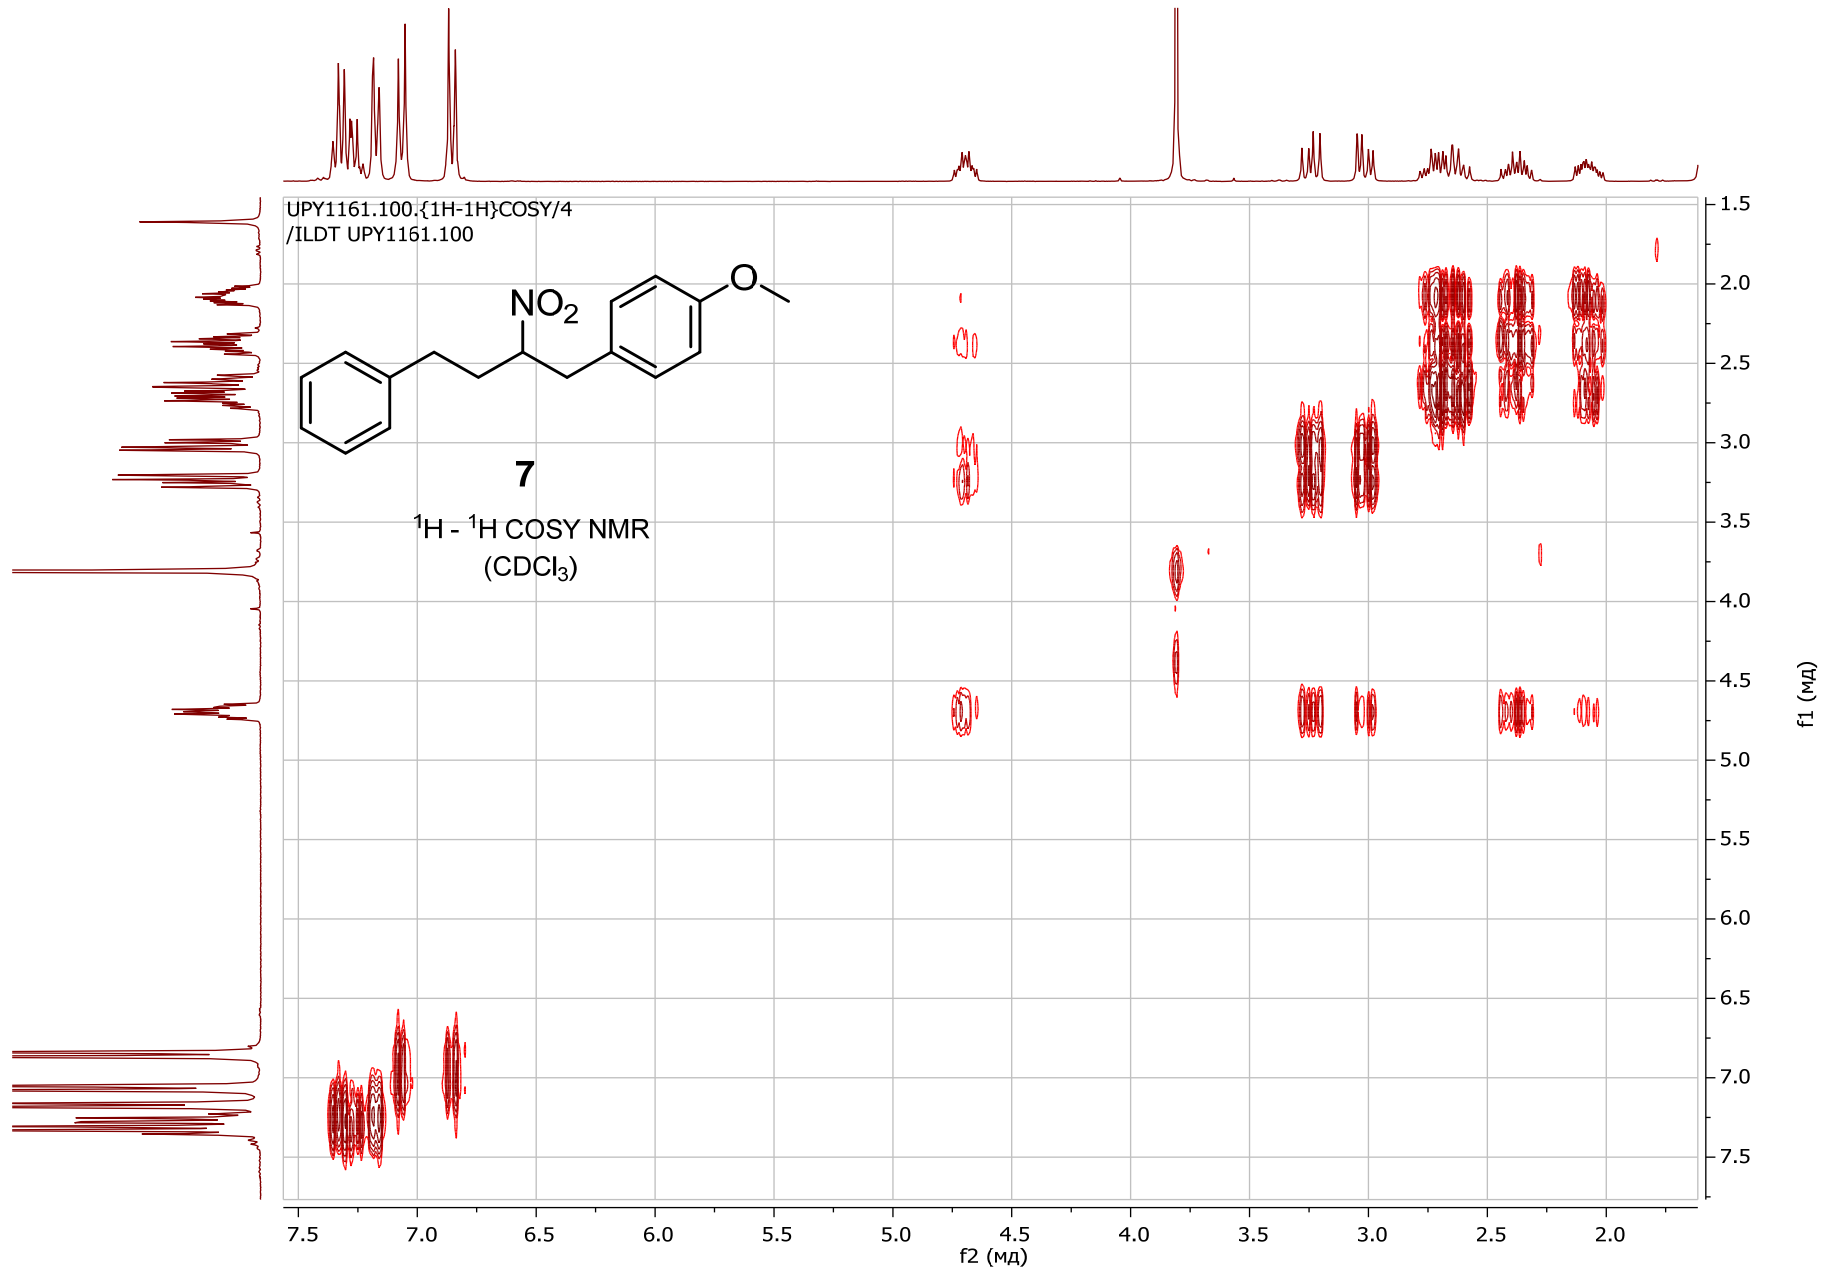

# NMR of 7

UPY1161.100.{13C}/2  
/ILDY UPY1161.100

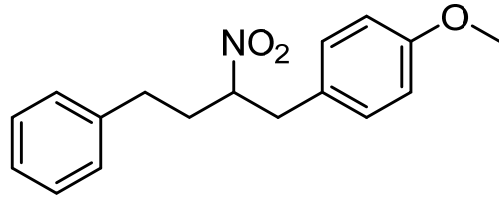

**7**

<sup>13</sup>C NMR (75 MHz, CDCl<sub>3</sub>)

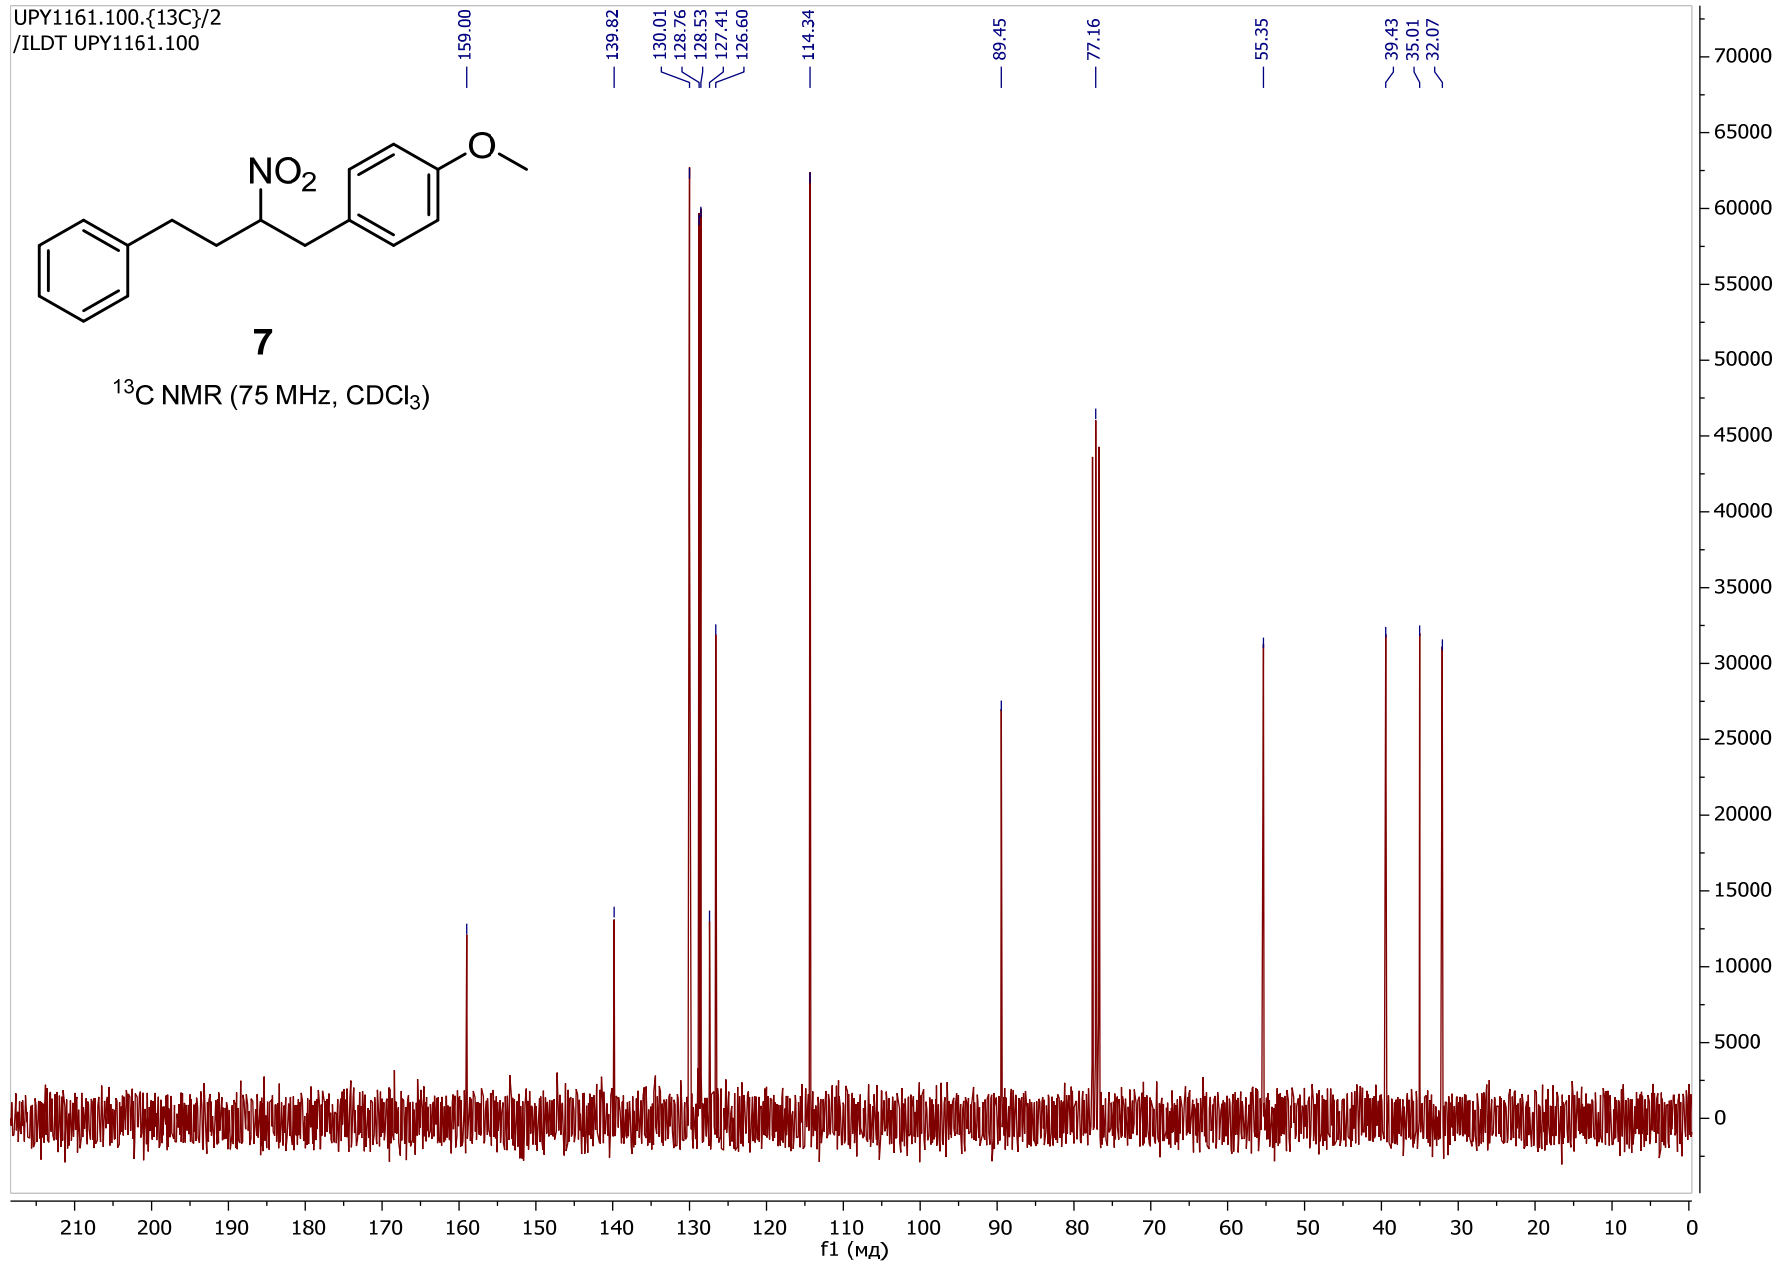

# NMR of 7

UPY1161.100.{13C}deptsp135/3  
/ILD T UPY1161.100

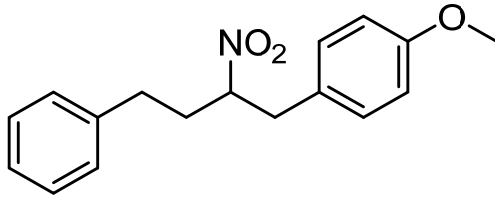

**7**

<sup>13</sup>C DEPT NMR  
(75 MHz, CDCl<sub>3</sub>)

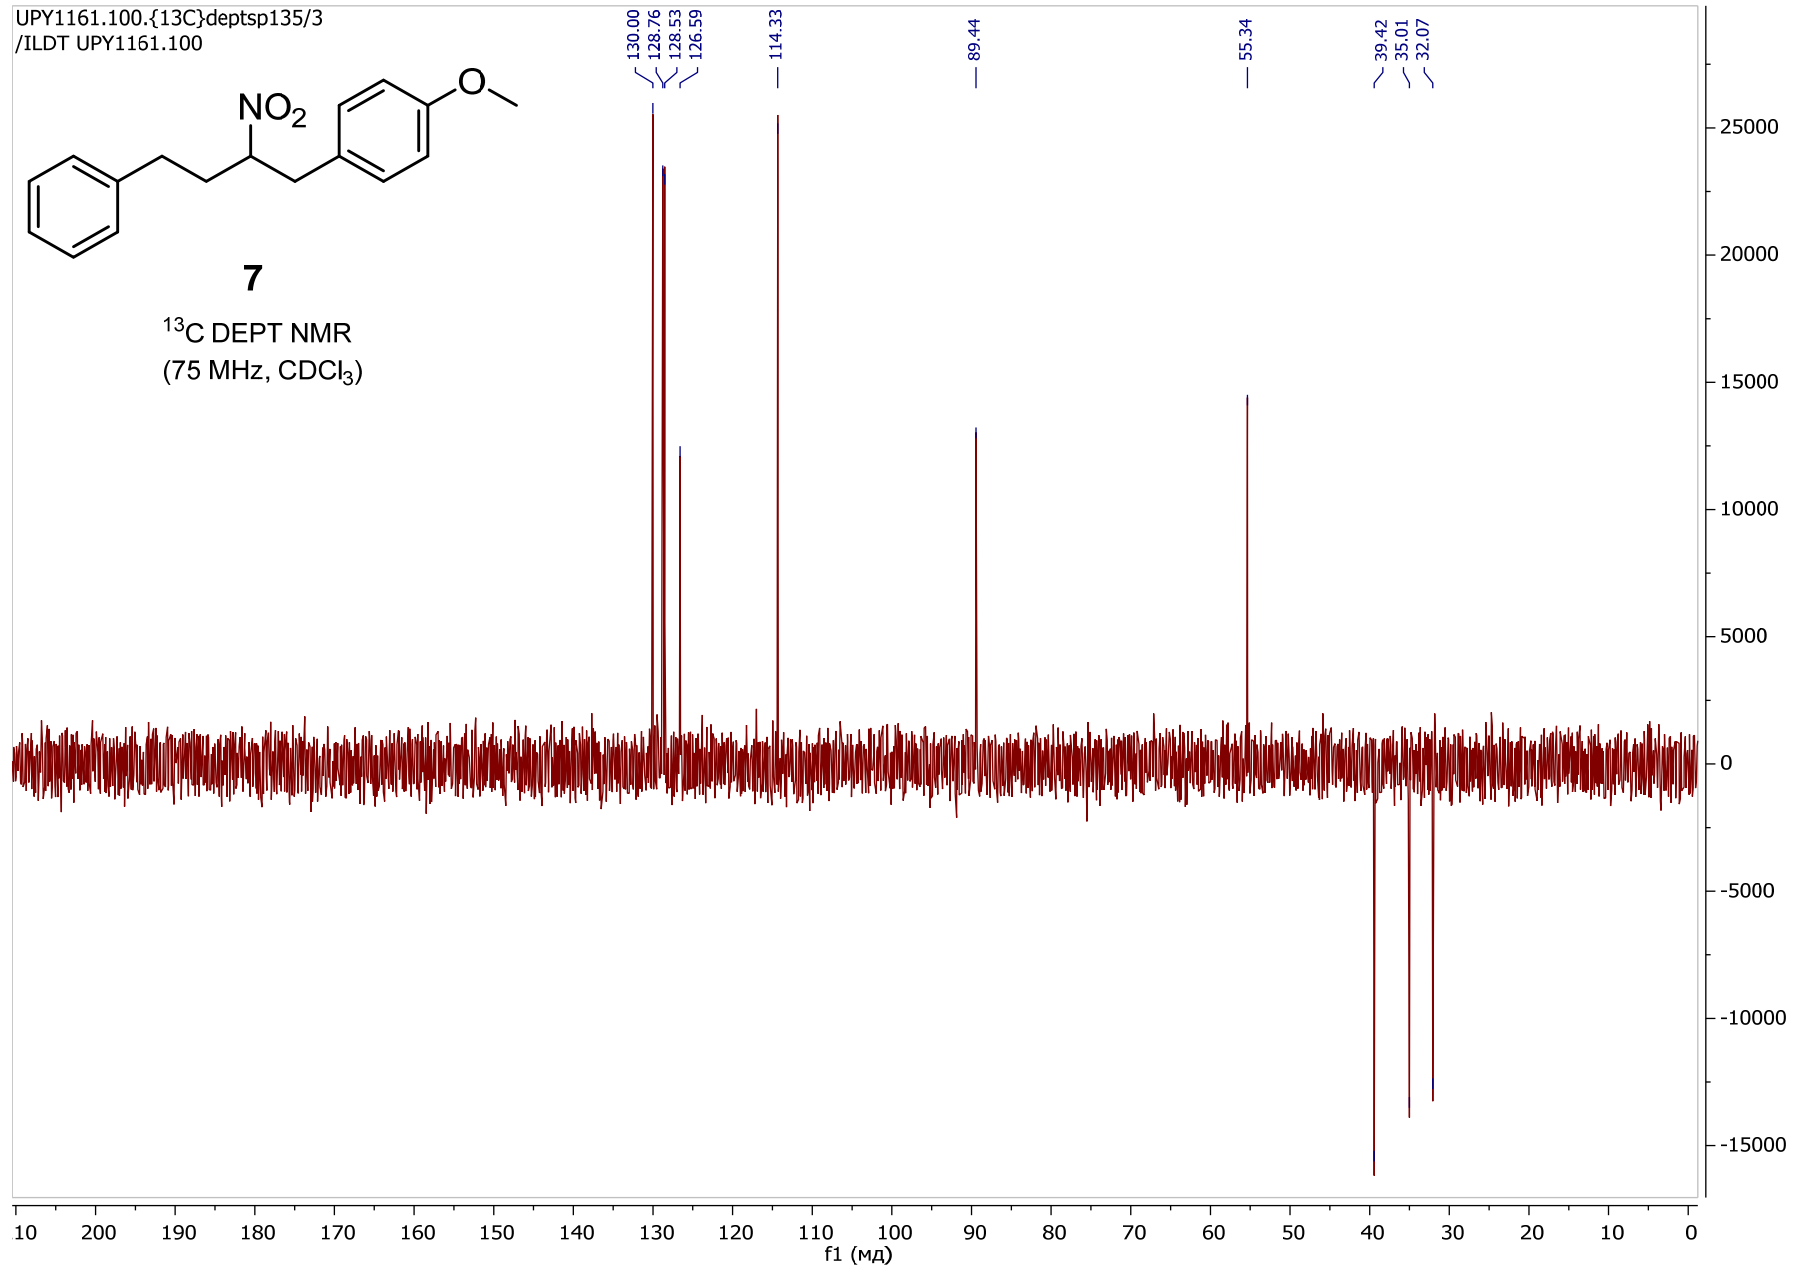

# NMR of 7

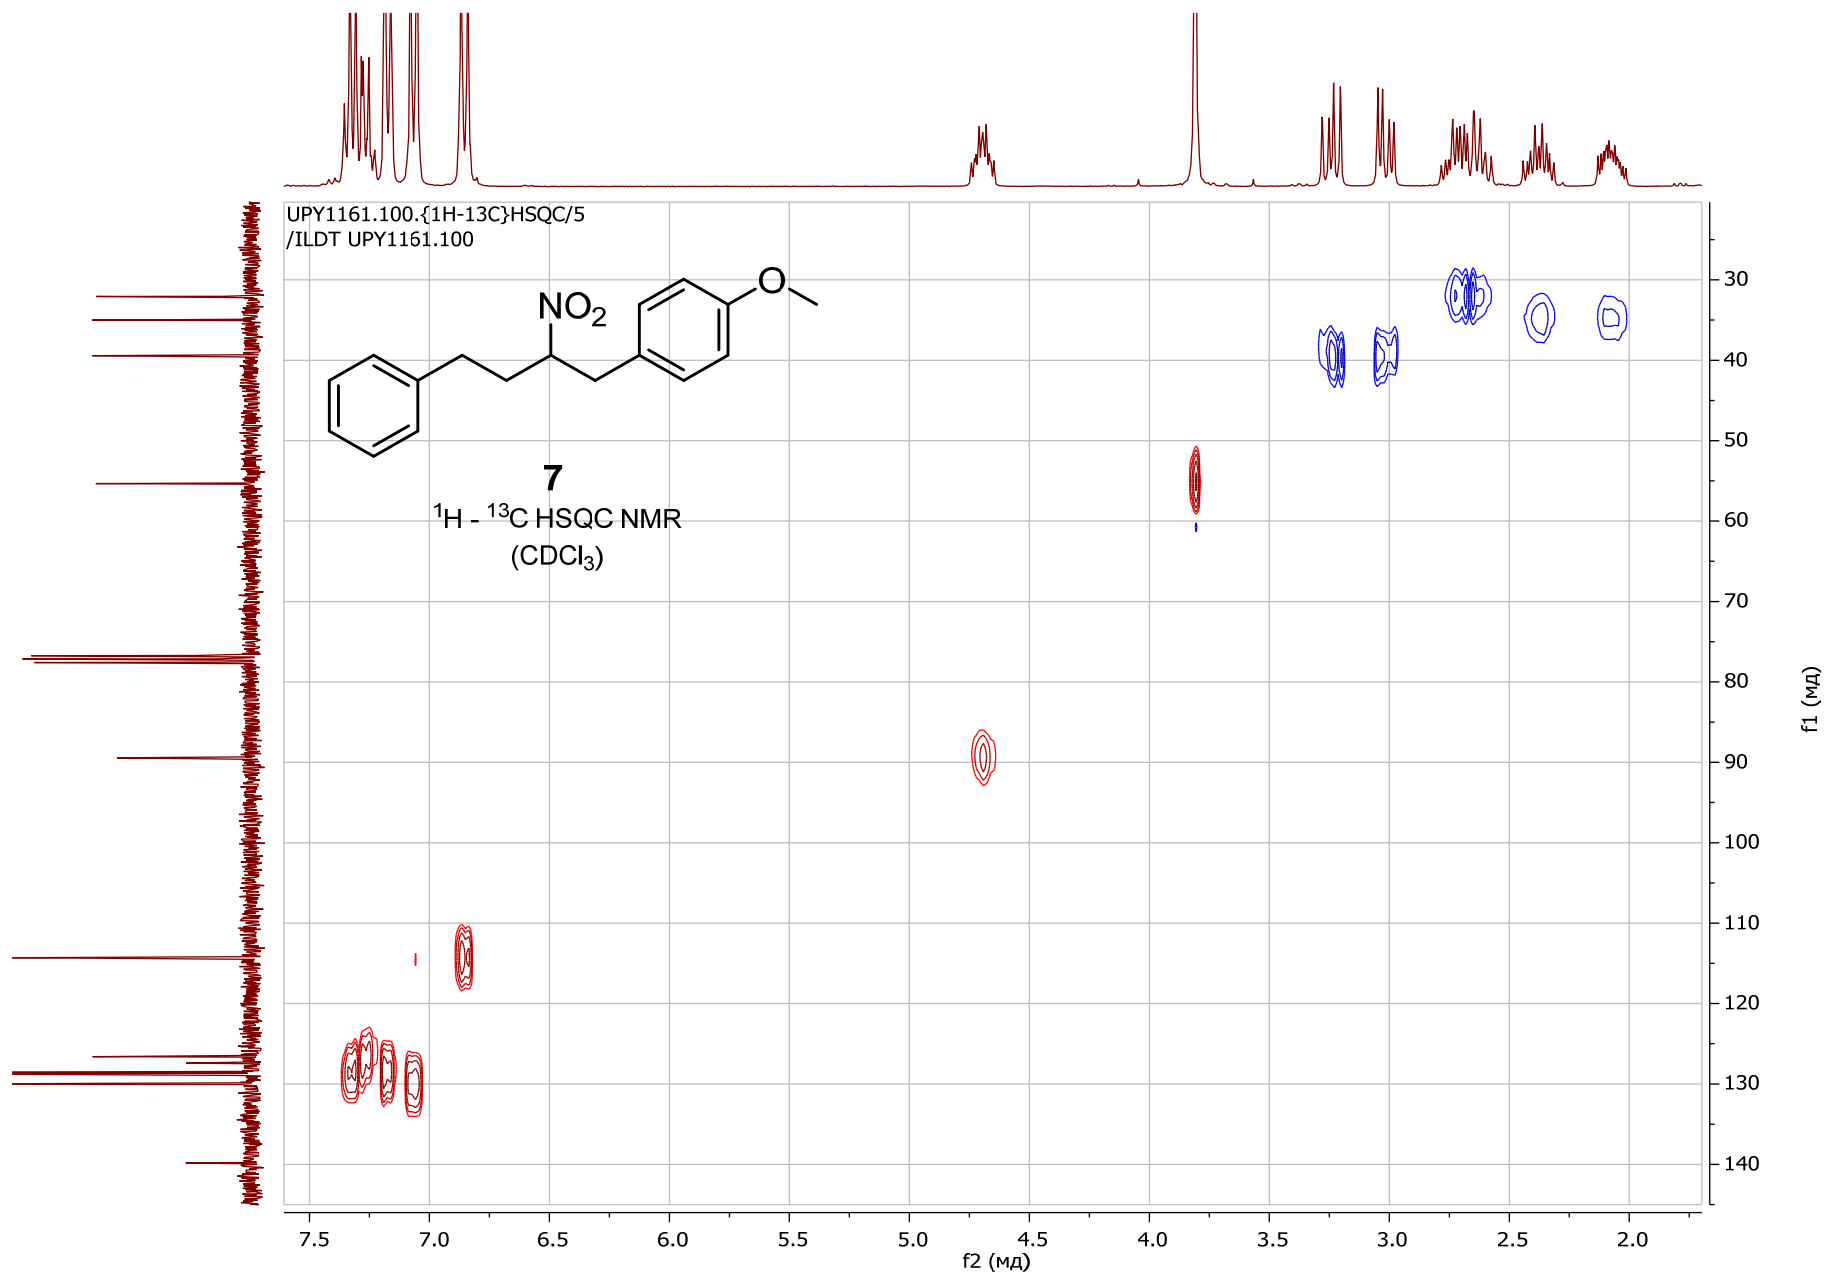

# FTIR (ATR) of 7

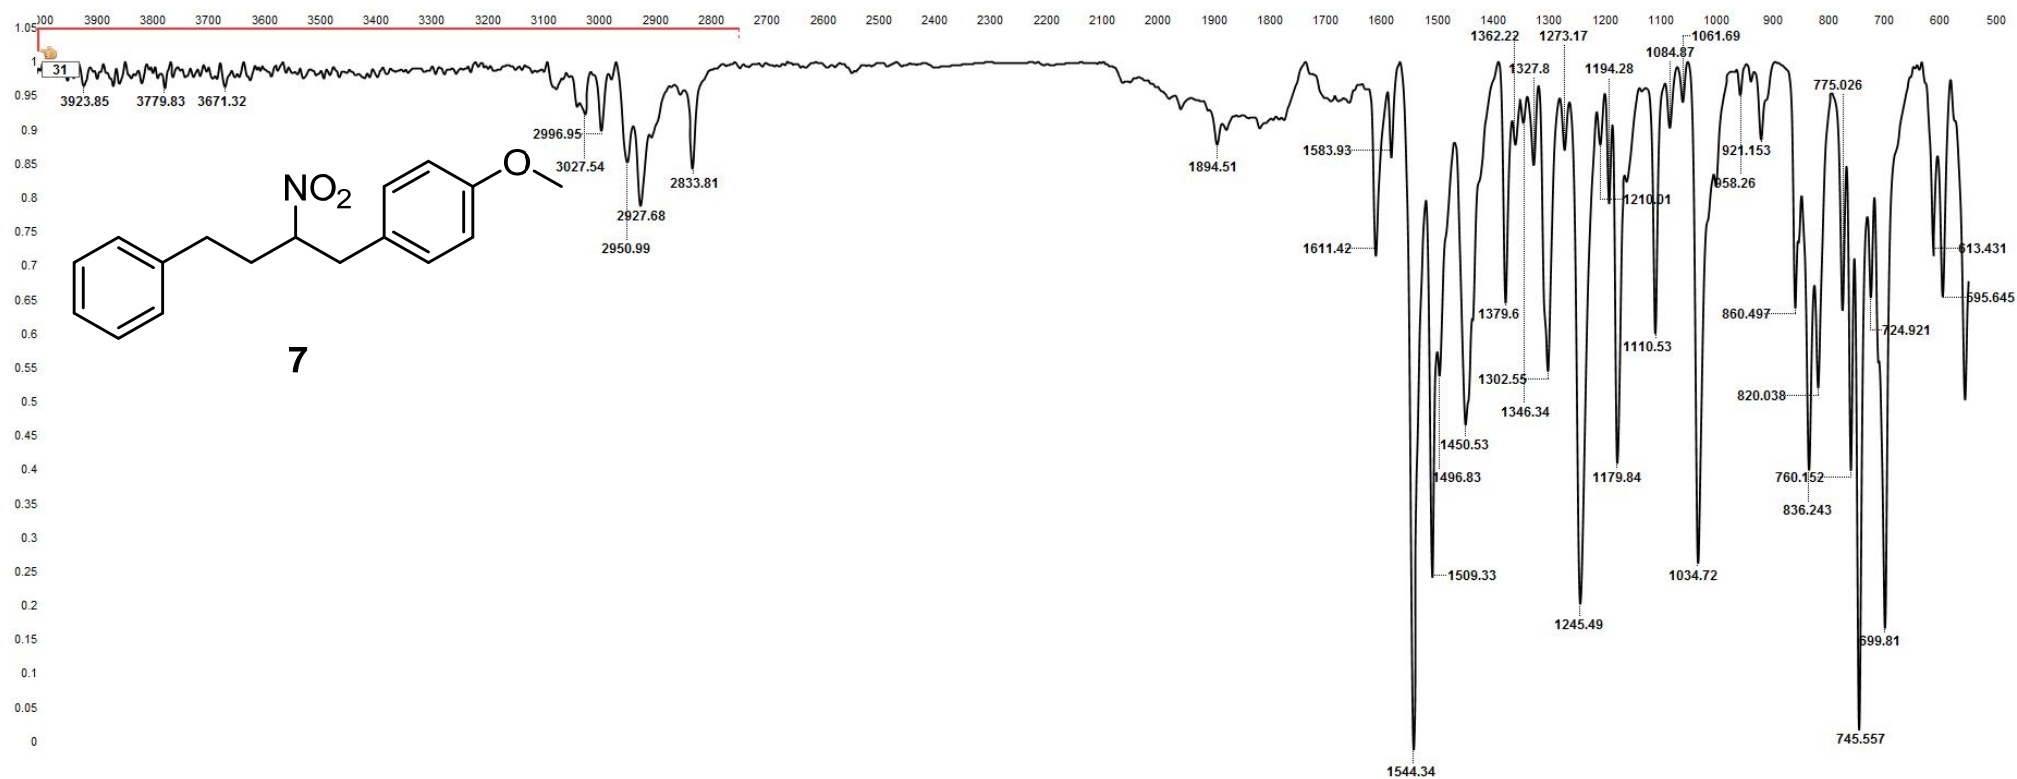

# NMR of 8

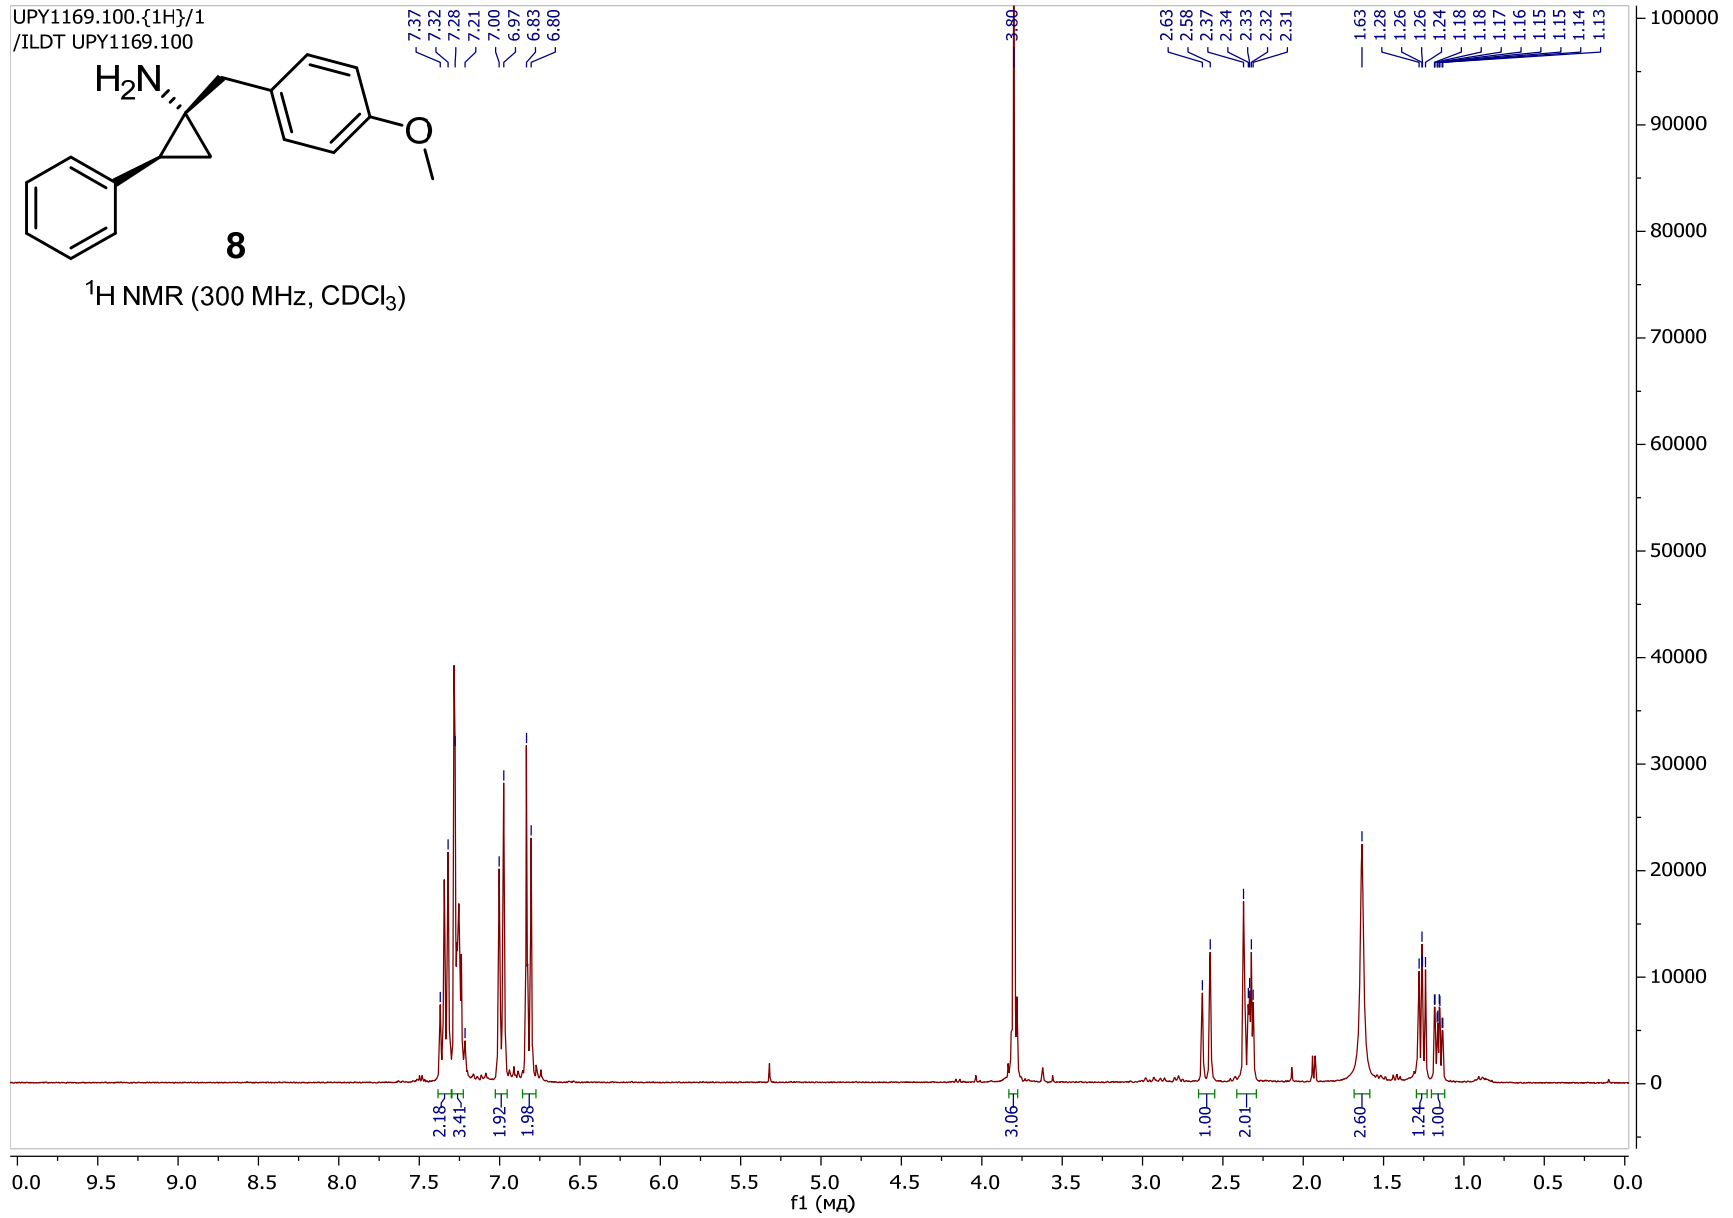

# NMR of 8

UPY1169.100.{13C}/2  
/ILDY UPY1169.100

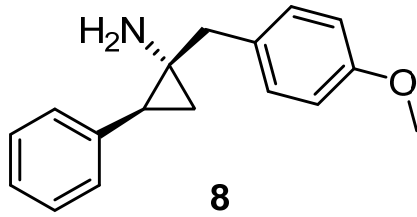

<sup>13</sup>C NMR (75 MHz, CDCl<sub>3</sub>)

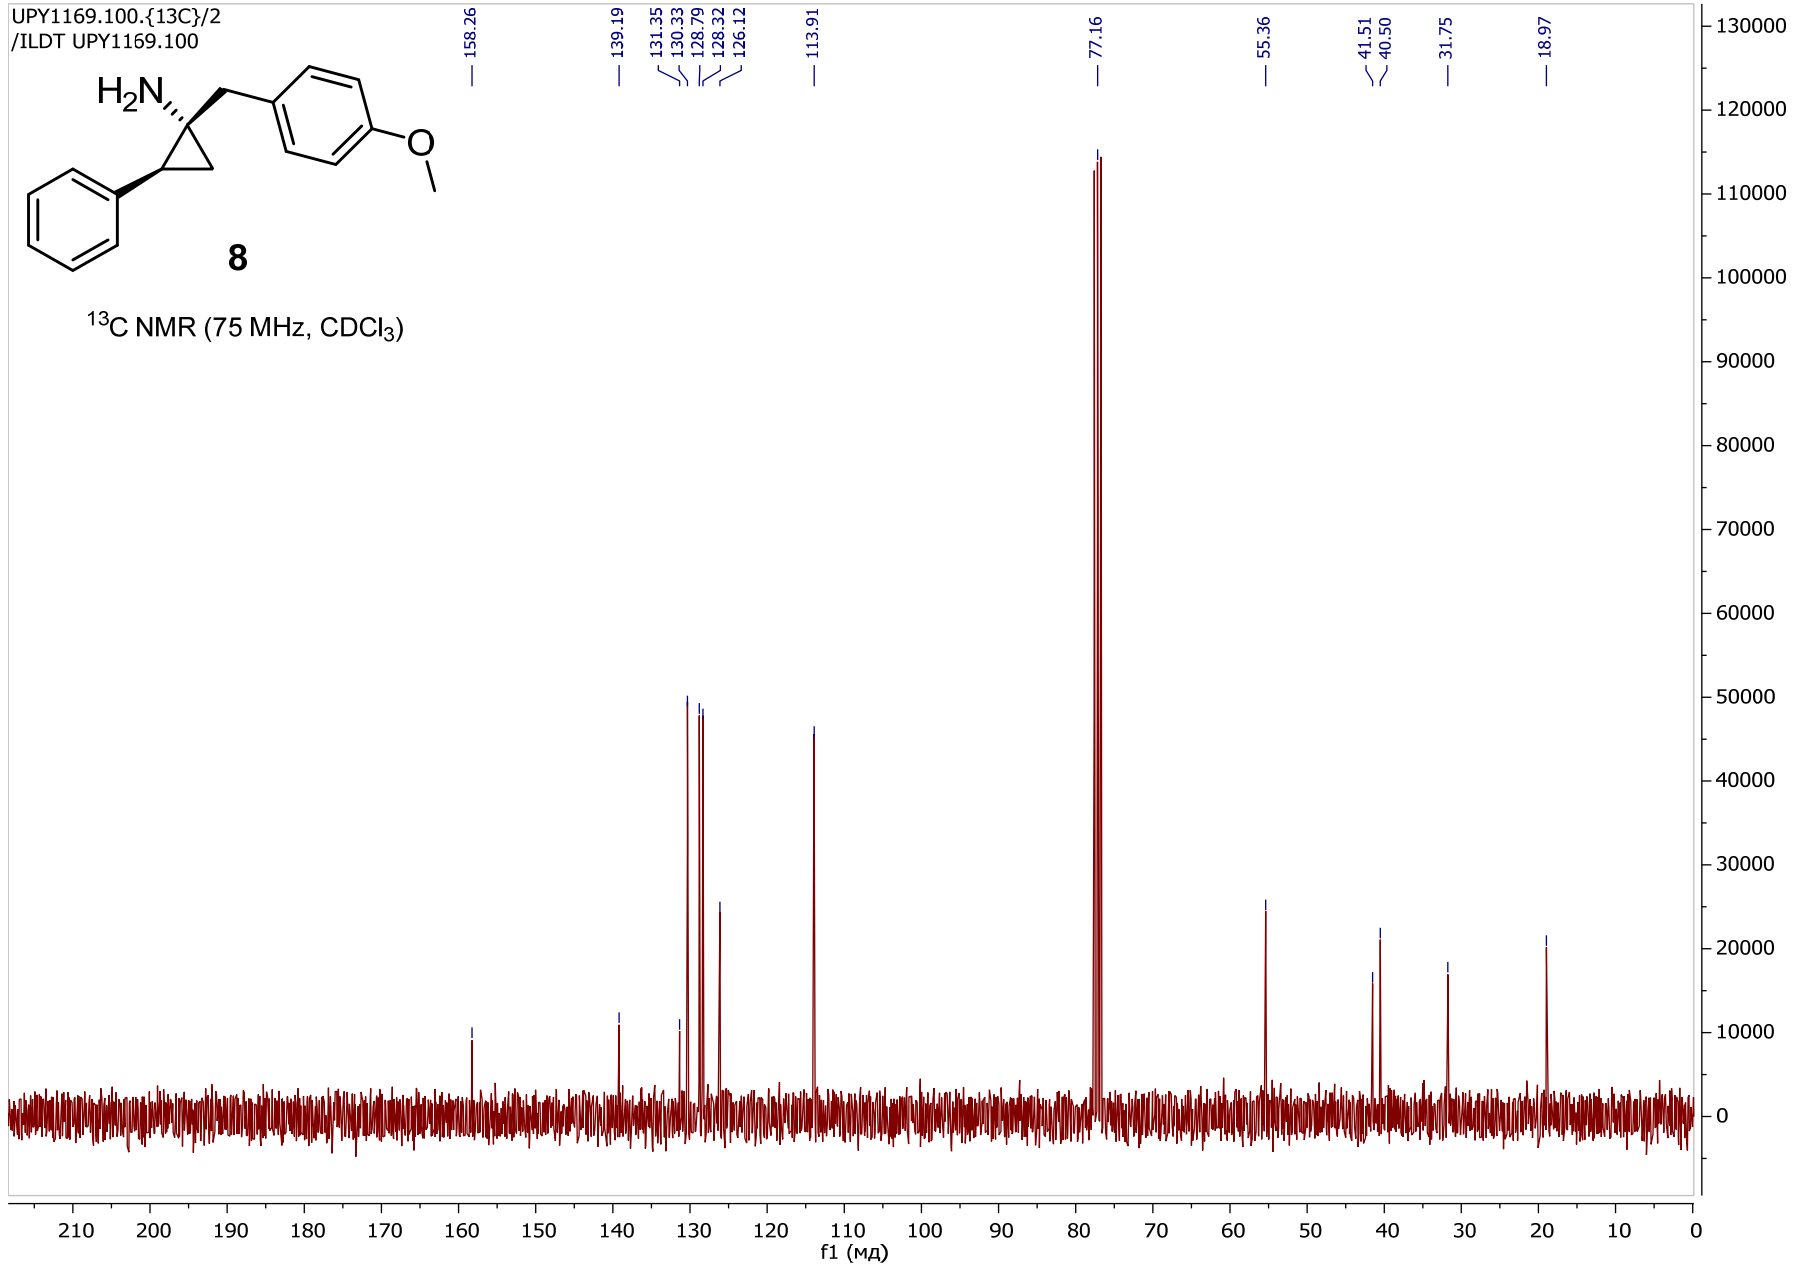



# NMR of 8

UPY1169.100.{13C}deptsp135/3  
/ILDT UPY1169.100

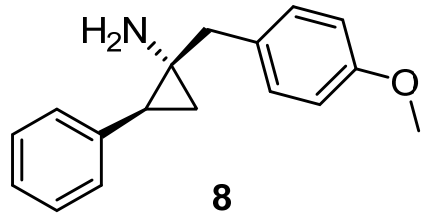

**8**  
<sup>13</sup>C DEPT NMR  
(75 MHz, CDCl<sub>3</sub>)

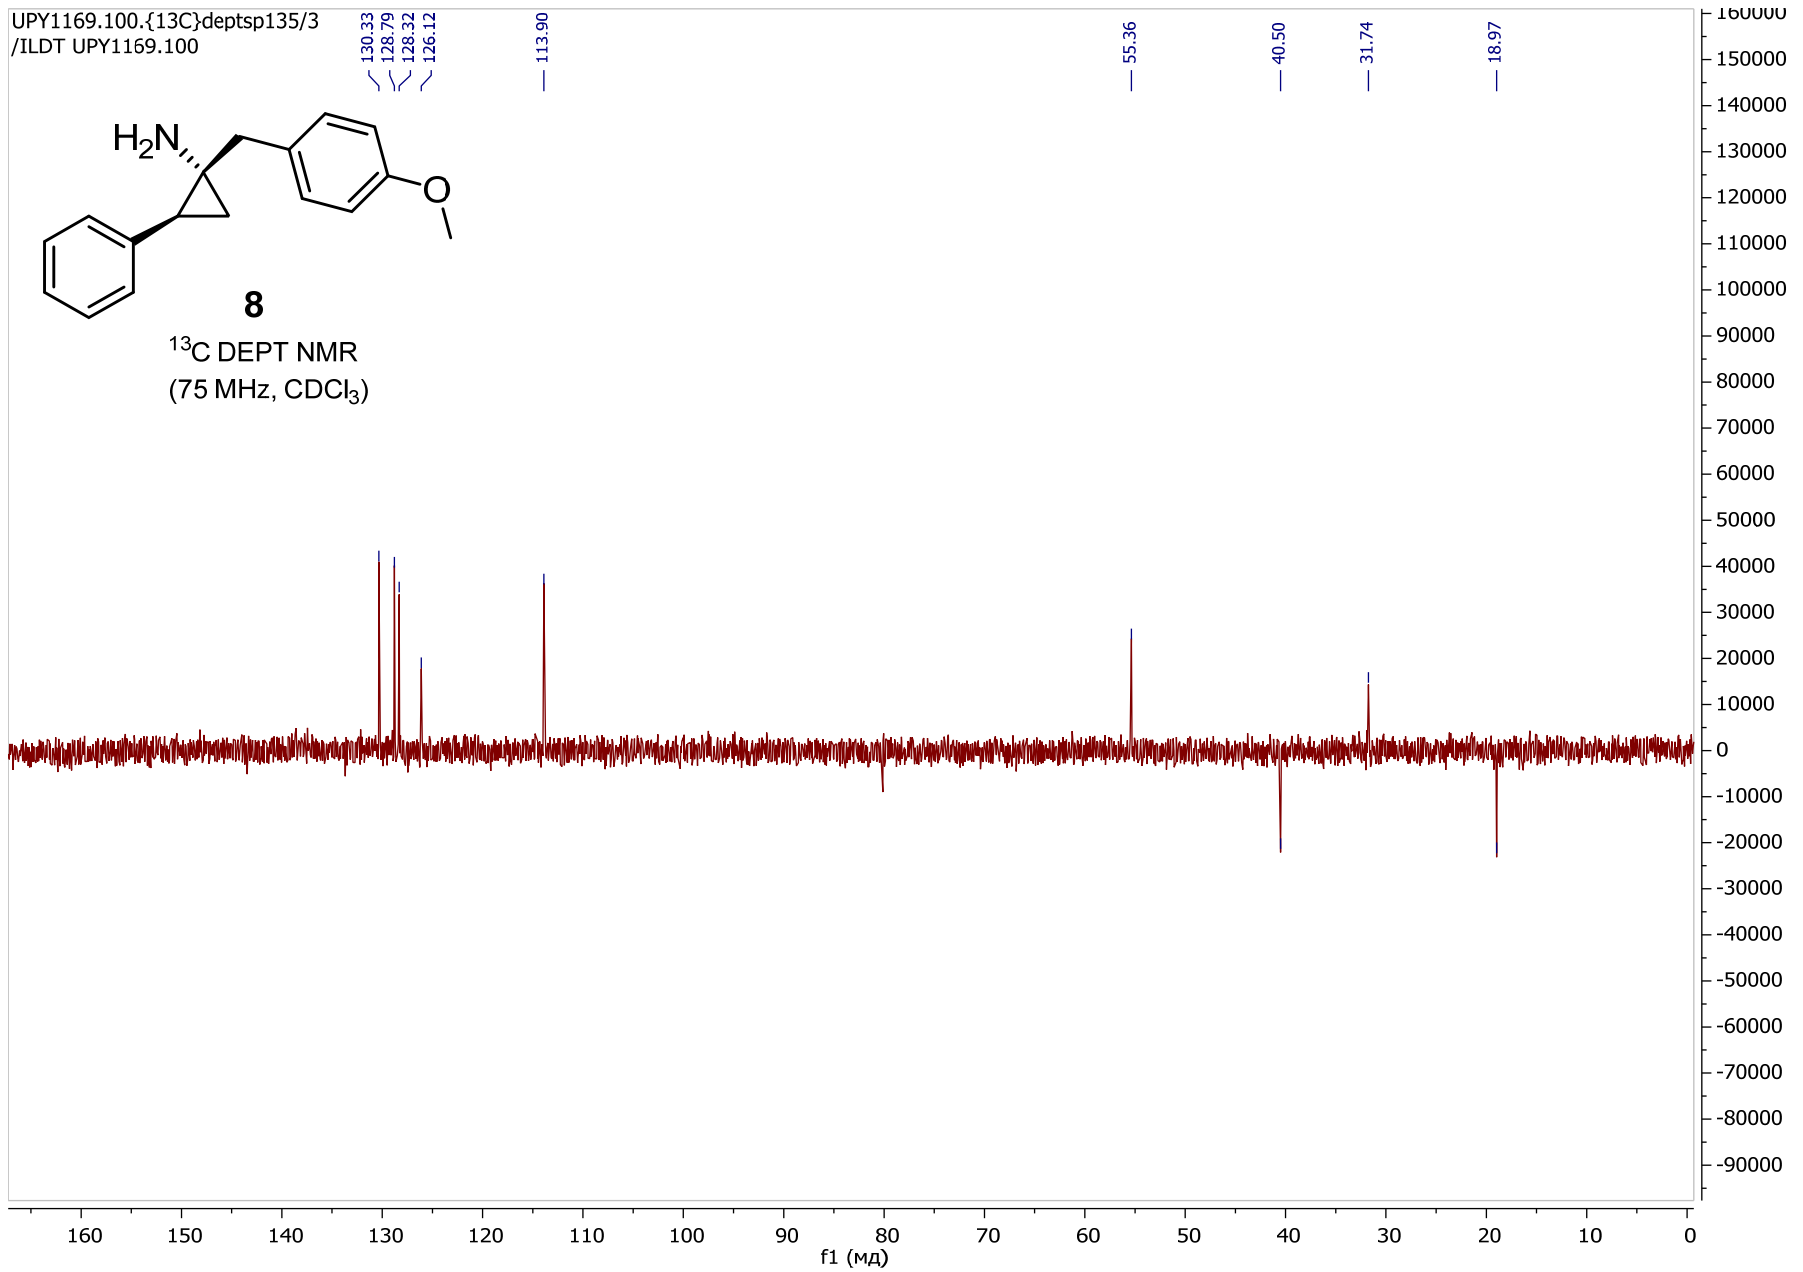

# NMR of 8

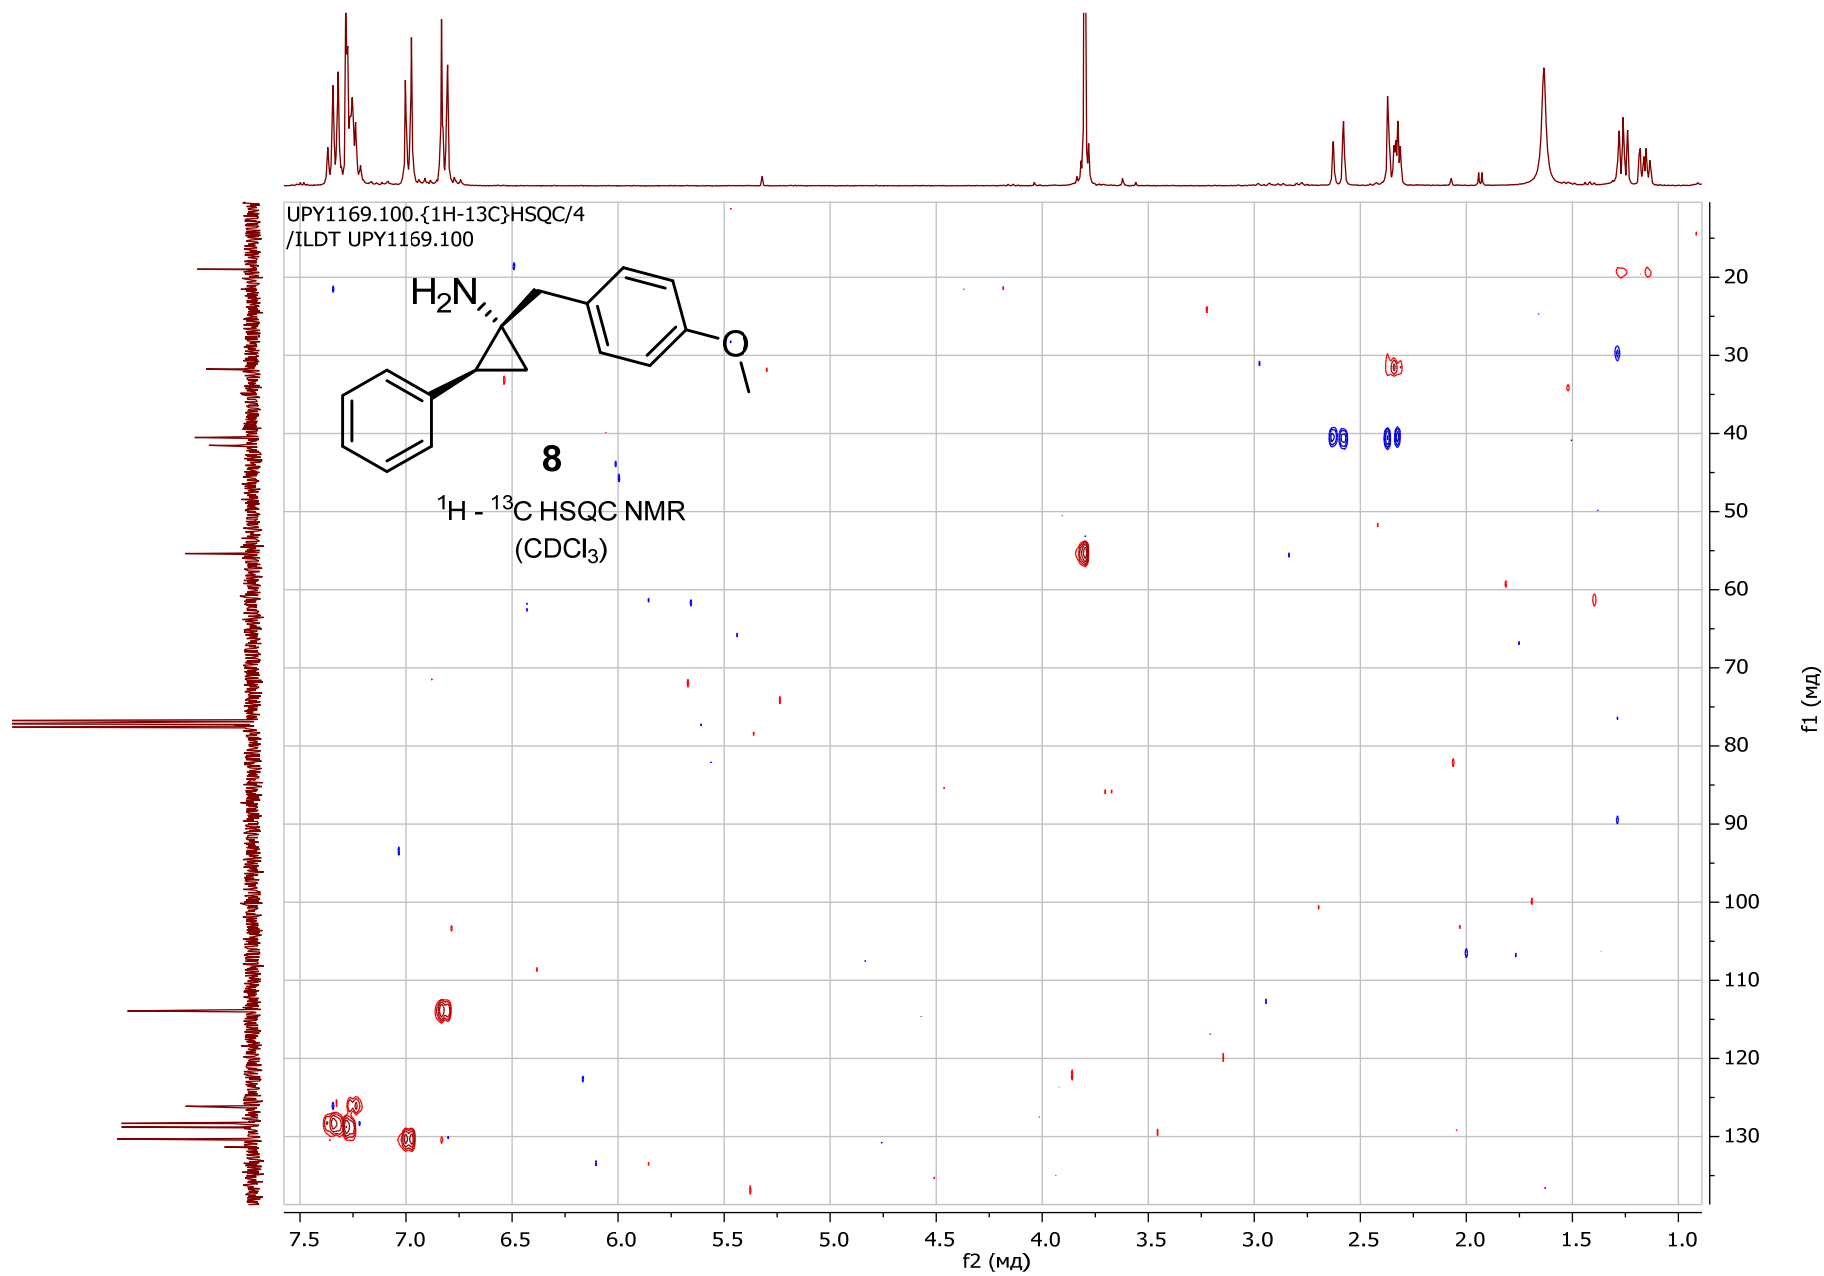

# FTIR (ATR) of 8

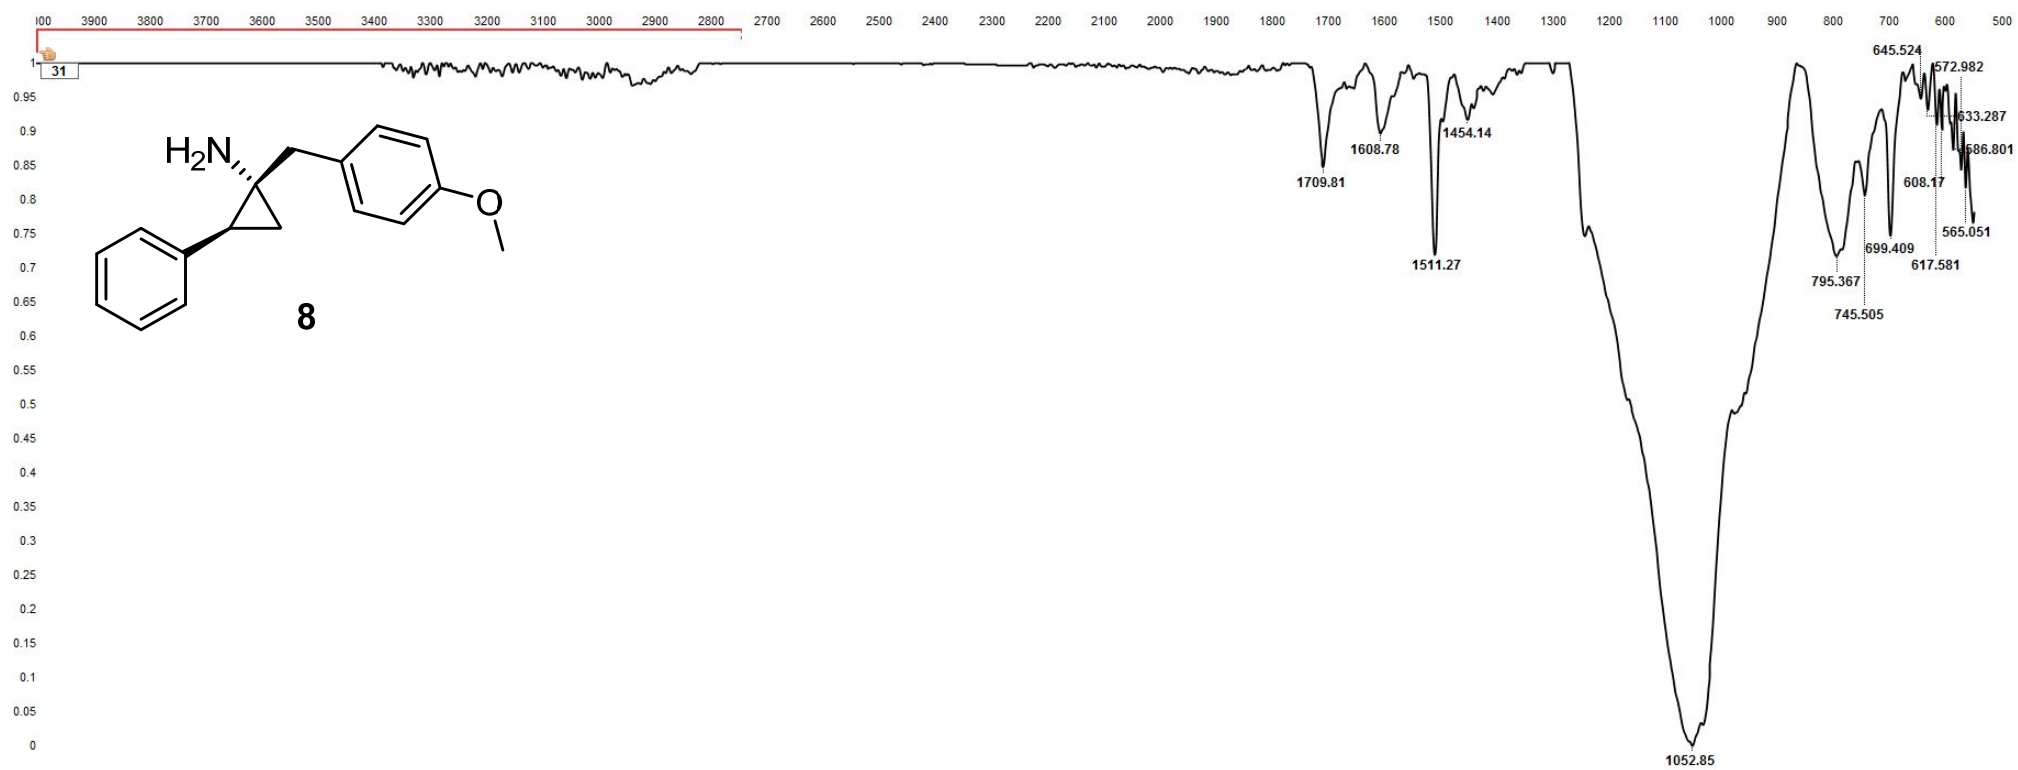

# NMR of 9 and 10

UPY1074.200.{1H}/1  
/ILDY1074.200

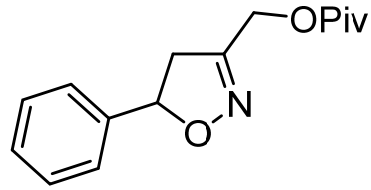

+

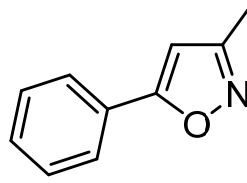

<sup>1</sup>H NMR (300 MHz, CDCl<sub>3</sub>)

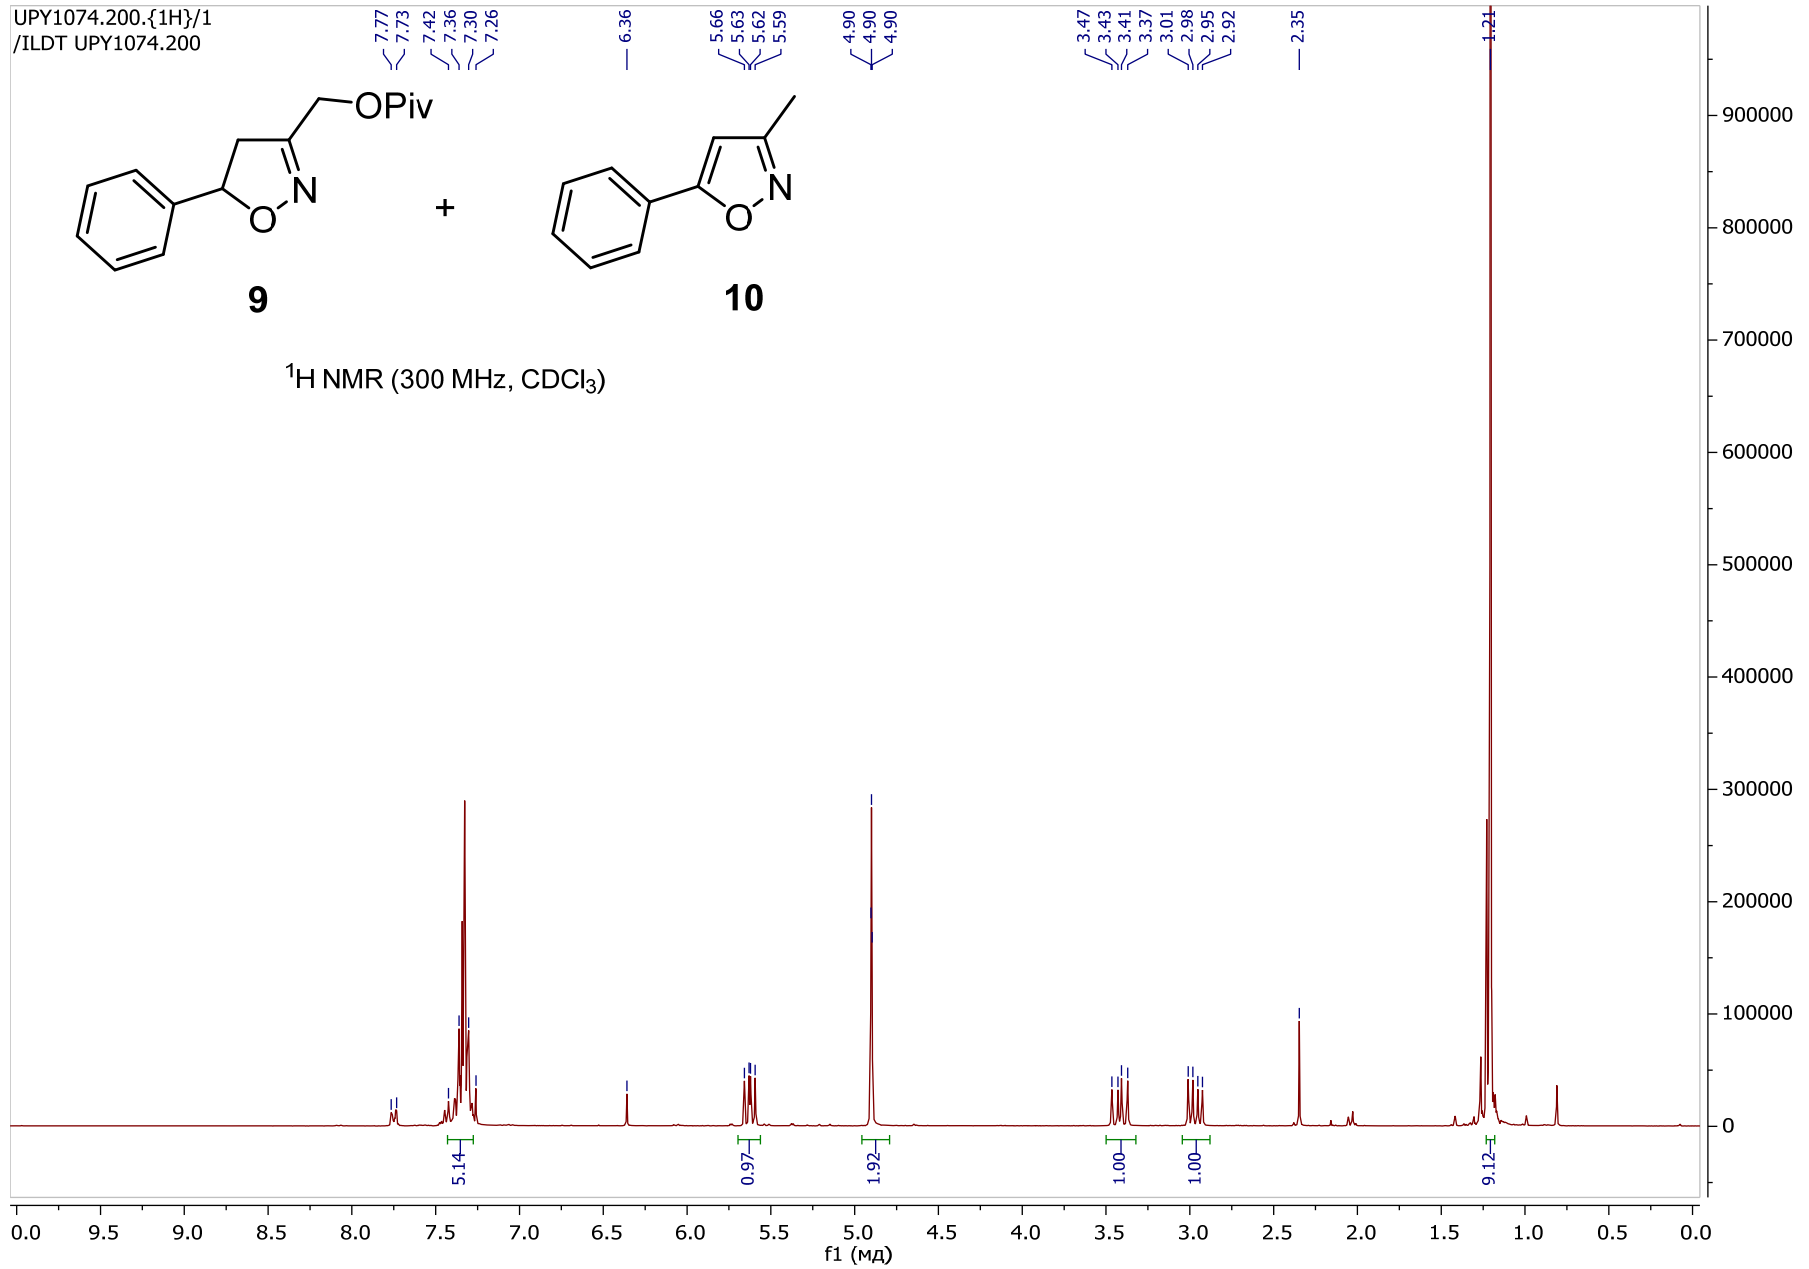

# NMR of 9 and 10

UPY1074.200.{13C}/2  
/ILDIT UPY1074.200

177.93

160.44

154.43

140.59

130.07

129.01

128.85

128.39

125.85

100.26

82.50

77.16

58.74

43.33

38.95

27.19

11.62

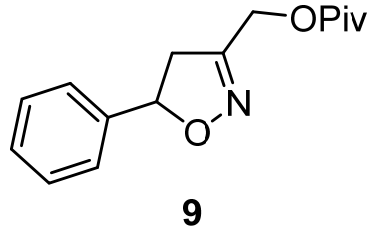

+

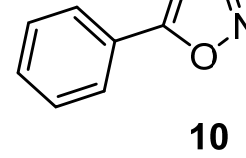

<sup>13</sup>C NMR (75 MHz, CDCl<sub>3</sub>)

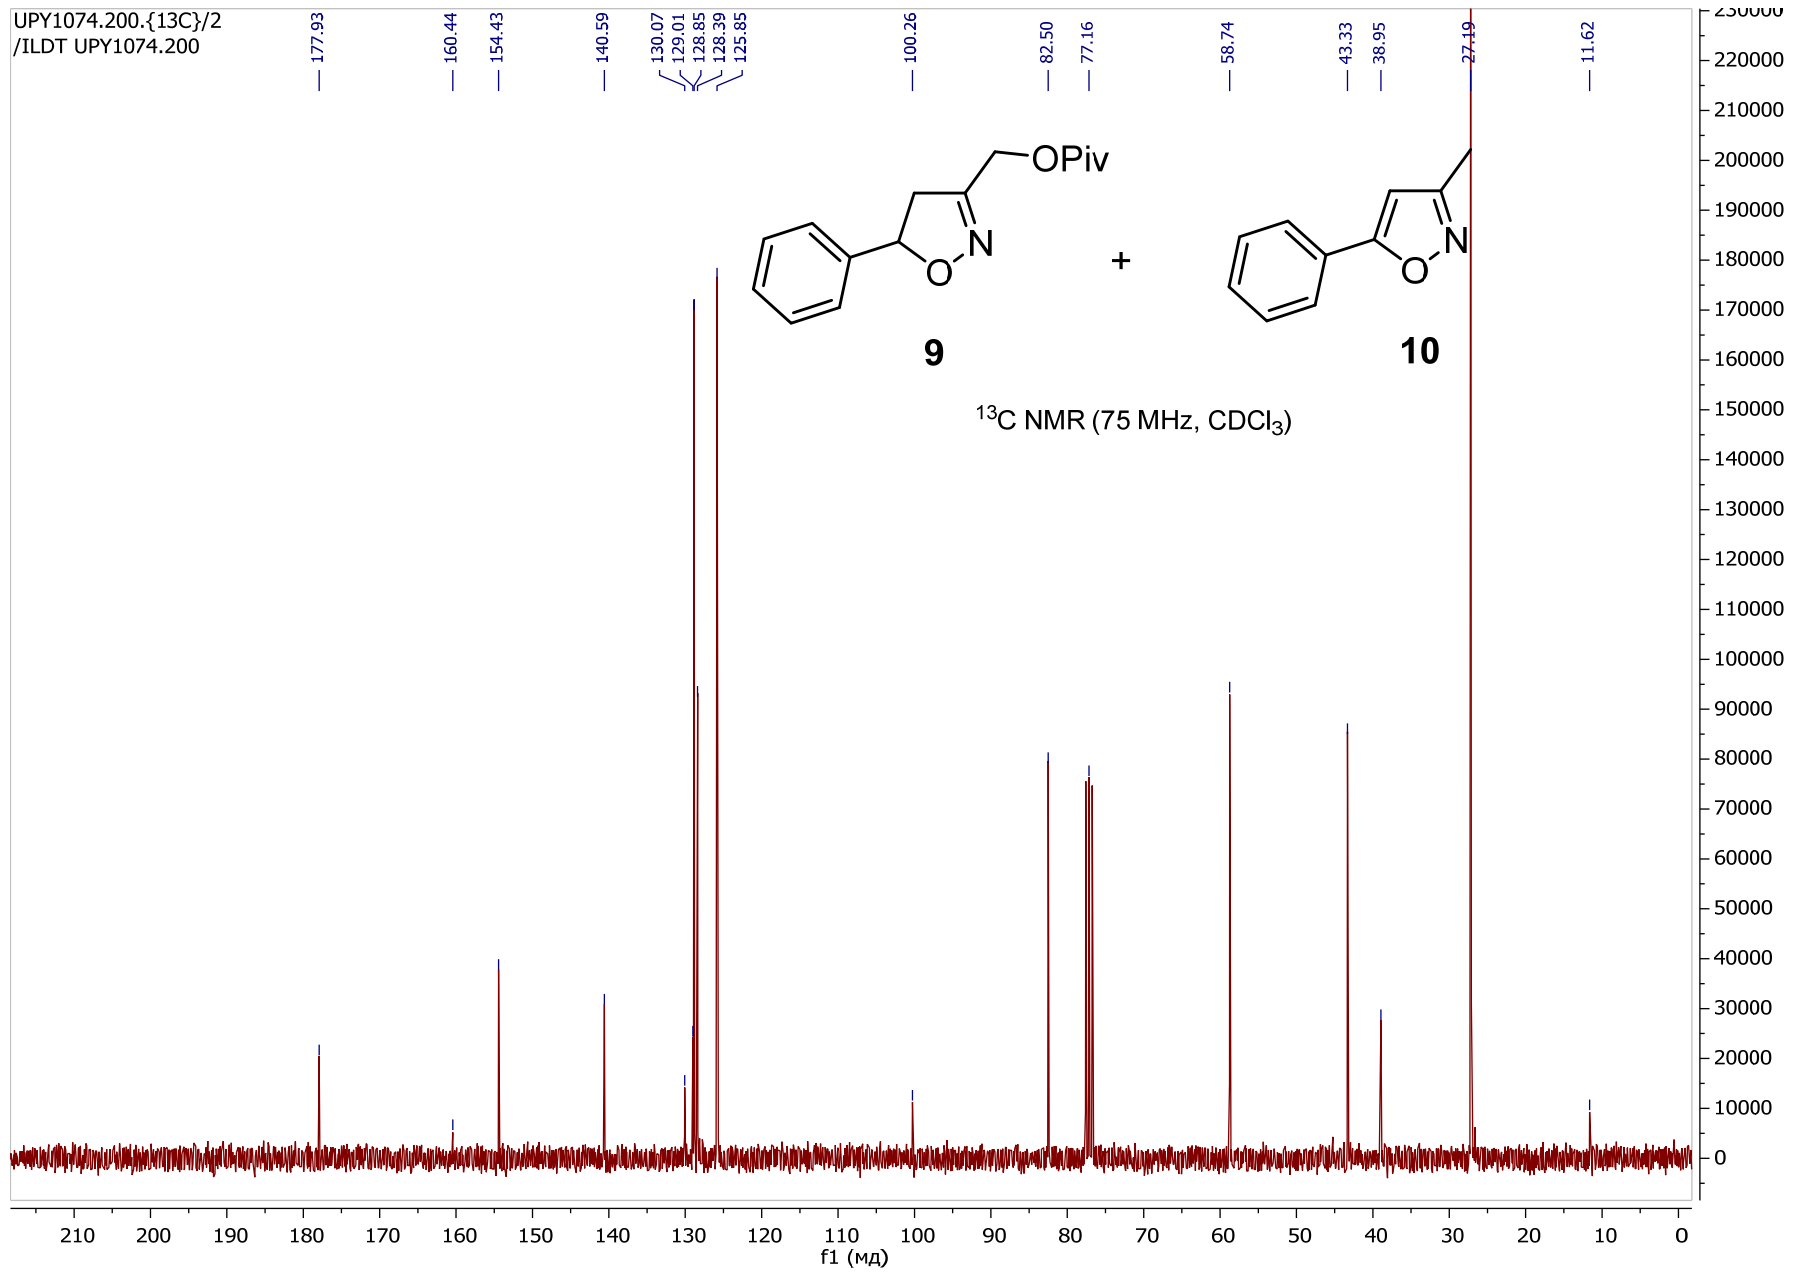

# NMR of 9 and 10

UPY1074.200.{13C}depts135/3  
/ILDY UPY1074.200

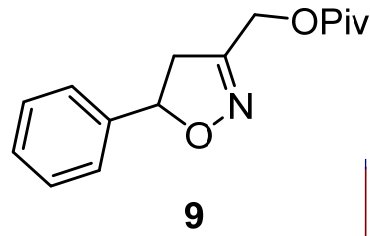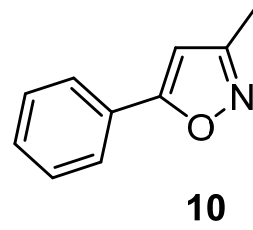

<sup>13</sup>C DEPT NMR  
(75 MHz, CDCl<sub>3</sub>)

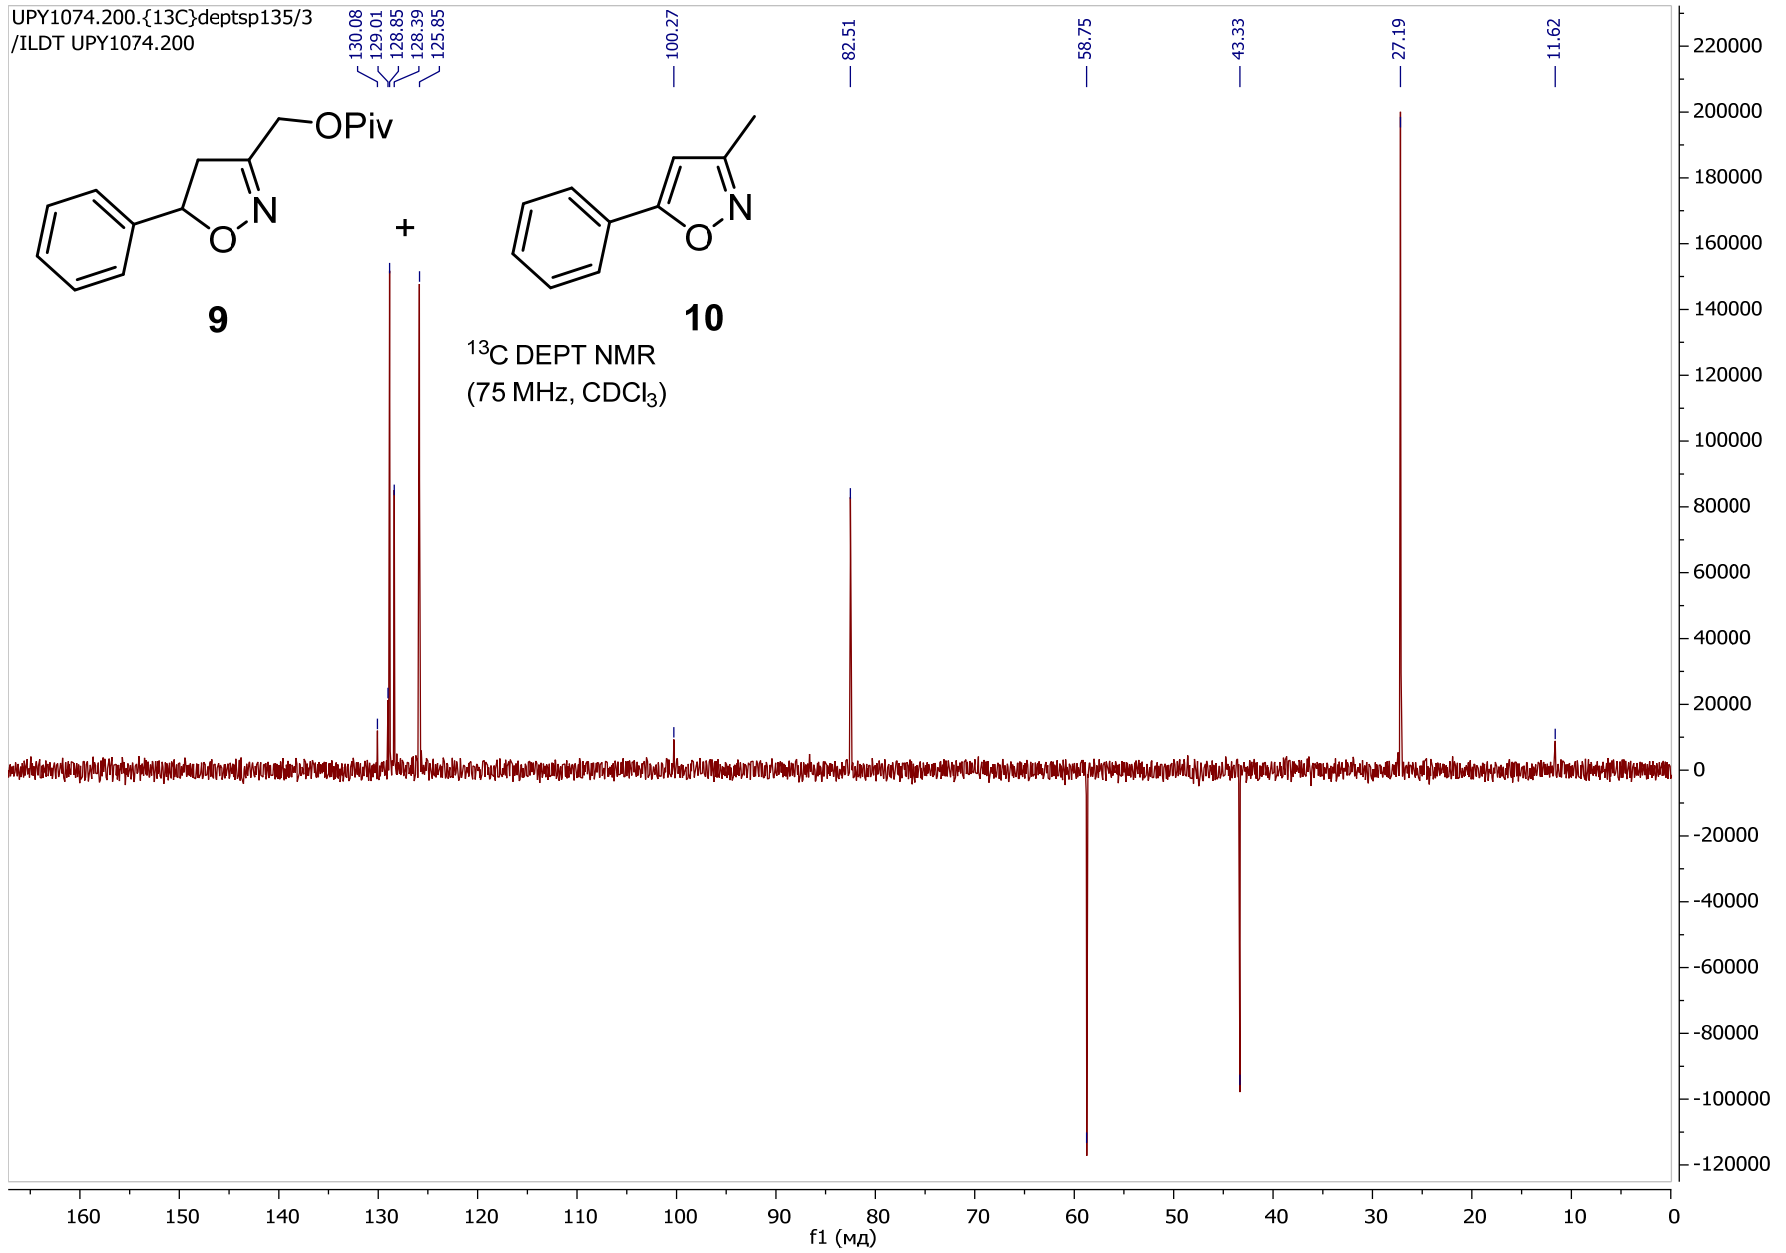

# FTIR (ATR) of 9 and 10

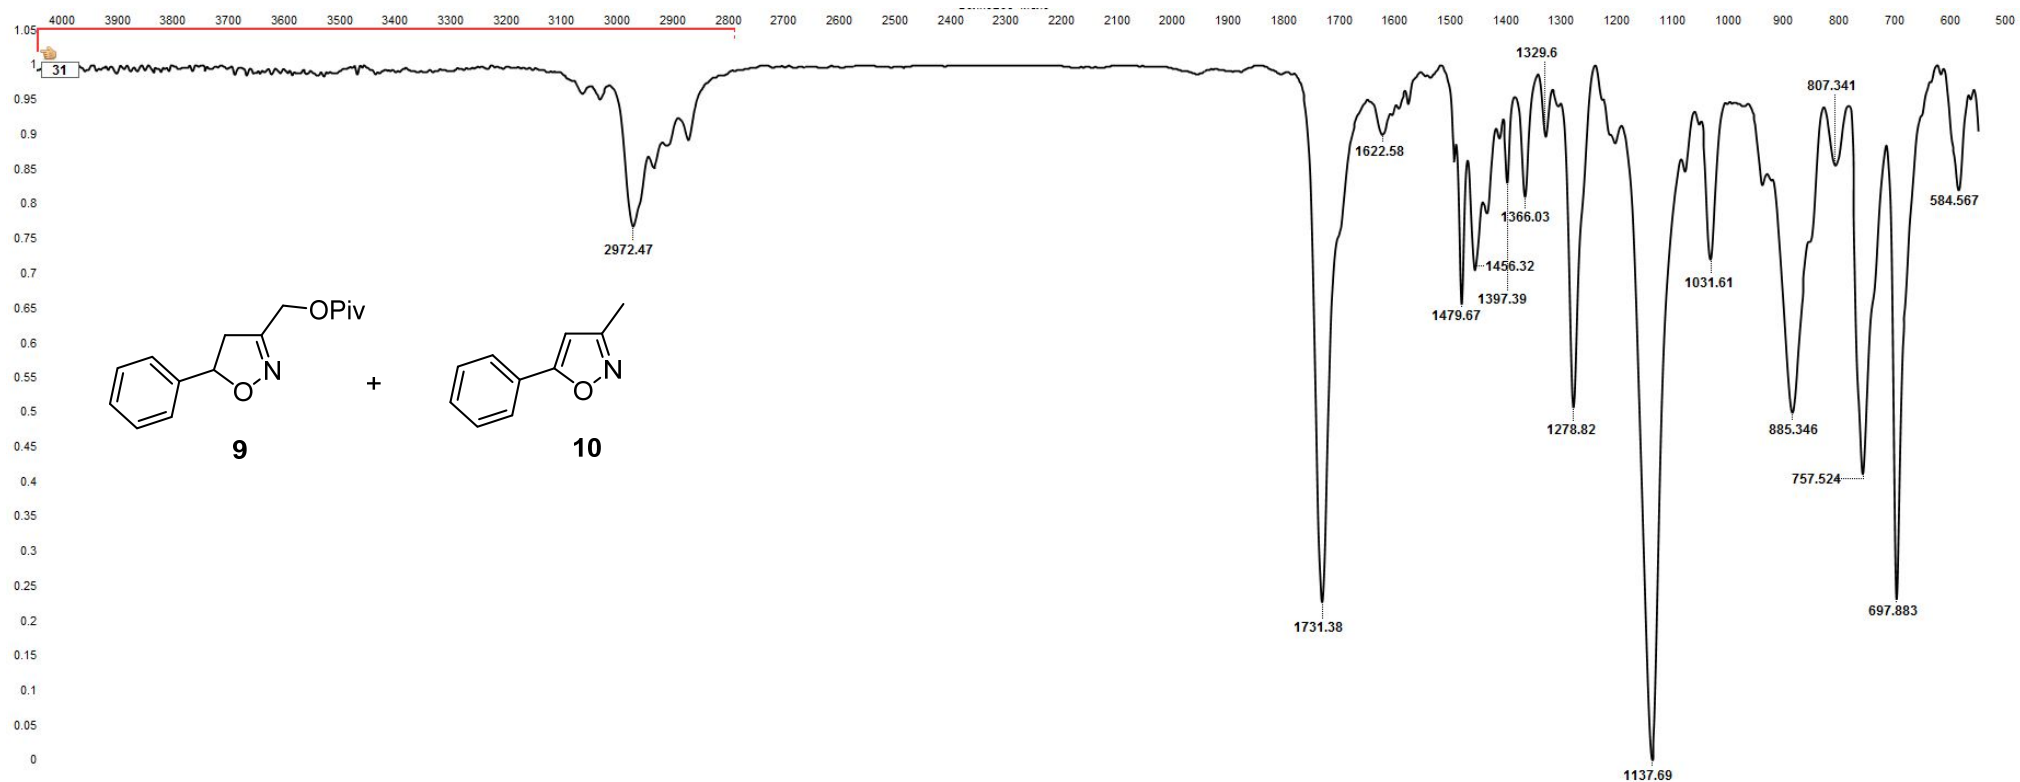

Supplement: d3qo01664a1.pdf [file d3qo01664a1.pdf]
